# Supplementary material
Source: ML conference proceedings conference paper supplement (https://openreview.net/forum?id=5Xwm8e6vbh)
Supplement: supplementary_material [file foundation_model_benchmark_results.pdf › foundation_model_benchmark_results.pdf]

## A ALZHEIMER: ALZHEIMER-DIMENTIA-HEALTHY CONTROL

### A.1 LEAVE-ONE-OUT RESULTS

#### A.1.1 LEAVE-ONE-OUT ZERO-SHOT EVALUATION

Table 1: Average Leave-One-Out Zero-Shot Performance Across All Subjects, Including Diagnosis Accuracy and AUC.

| Model (Training strategy) | Acc.1                         | Acc.2                         | Diagnosis Acc | Diagnosis AUC |
|---------------------------|-------------------------------|-------------------------------|---------------|---------------|
| <b>DeepConvnet</b>        | 0.535<br>$\pm 0.355$          | 0.811<br>$\pm 0.275$          | 0.511         | 0.534         |
| <b>EEGNet</b>             | 0.605<br>$\pm 0.324$          | <b>0.860</b><br>$\pm 0.201$   | 0.648         | 0.605         |
| <b>Conformer</b>          | 0.528<br>$\pm 0.333$<br>0.543 | 0.817<br>$\pm 0.250$<br>0.826 | 0.557         | 0.528         |
| <b>CTNet</b>              | $\pm 0.338$<br>0.557          | $\pm 0.244$<br>0.828          | 0.545         | 0.543         |
| <b>BIOT (f)</b>           | $\pm 0.336$<br>0.514          | $\pm 0.212$<br>0.795          | 0.602         | 0.556         |
| <b>BIOT (l)</b>           | $\pm 0.317$<br>0.537          | $\pm 0.236$<br>0.805          | 0.523         | 0.514         |
| <b>BENDR (f)</b>          | $\pm 0.302$<br>0.370          | $\pm 0.175$<br>0.695          | 0.511         | 0.536         |
| <b>BENDR (l)</b>          | $\pm 0.222$<br>0.530          | $\pm 0.235$<br>0.831          | 0.330         | 0.369         |
| <b>CBraMod (f)</b>        | $\pm 0.337$<br>0.435          | $\pm 0.231$<br>0.766          | 0.545         | 0.529         |
| <b>CBraMod (l)</b>        | $\pm 0.244$<br>0.582          | $\pm 0.220$<br>0.839          | 0.420         | 0.435         |
| <b>EEGPT (f)</b>          | $\pm 0.354$<br>0.561          | $\pm 0.224$<br>0.844          | 0.602         | 0.582         |
| <b>EEGPT (l)</b>          | $\pm 0.342$<br>0.558          | $\pm 0.237$<br>0.849          | 0.557         | 0.561         |
| <b>LaBraM (f)</b>         | $\pm 0.362$<br>0.446          | $\pm 0.236$<br>0.756          | 0.557         | 0.557         |
| <b>LaBraM (l)</b>         | $\pm 0.381$                   | $\pm 0.327$                   | 0.511         | 0.446         |
| <b>STEEGformer-s (f)</b>  | <b>0.593</b><br>$\pm 0.368$   | 0.864<br>$\pm 0.215$          | 0.602         | <b>0.592</b>  |
| <b>STEEGformer-s (l)</b>  | 0.526<br>$\pm 0.408$<br>0.588 | 0.784<br>$\pm 0.309$<br>0.850 | 0.534         | 0.525         |
| <b>STEEGformer-b (f)</b>  | $\pm 0.374$<br>0.554          | $\pm 0.240$<br>0.812          | <b>0.625</b>  | 0.587         |
| <b>STEEGformer-b (l)</b>  | $\pm 0.378$<br>0.590          | $\pm 0.282$<br>0.853          | 0.568         | 0.553         |
| <b>STEEGformer-l (f)</b>  | $\pm 0.368$<br>0.570          | $\pm 0.247$<br>0.822          | 0.602         | 0.589         |
| <b>STEEGformer-l (l)</b>  | $\pm 0.398$                   | $\pm 0.286$                   | 0.580         | 0.570         |

Table 2: Per-Subject Leave-One-Out Zero-Shot Performance.

| Subject   | Metric   | DeepConvnet  | EEGNet | Conformer    | CTNet | BIOT (f)     | BIOT (l)     | BENDR (f)    | BENDR (l) | CBraMod (f)  | CBraMod (l) | EEGPT (f)    | EEGPT (l)    | LaBraM (f)   | LaBraM (l)   | STEEGformer-s (f) | STEEGformer-s (l) | STEEGformer-b (f) | STEEGformer-b (l) | STEEGformer-l (f) | STEEGformer-l (l) |
|-----------|----------|--------------|--------|--------------|-------|--------------|--------------|--------------|-----------|--------------|-------------|--------------|--------------|--------------|--------------|-------------------|-------------------|-------------------|-------------------|-------------------|-------------------|
| Asub-001B | $\kappa$ | nan          | nan    | nan          | nan   | nan          | nan          | nan          | nan       | nan          | nan         | nan          | nan          | nan          | nan          | nan               | nan               | nan               | nan               | nan               | nan               |
|           | AUC      | nan          | nan    | nan          | nan   | nan          | nan          | nan          | nan       | nan          | nan         | nan          | nan          | nan          | nan          | nan               | nan               | nan               | nan               | nan               | nan               |
|           | Acc.1    | 0.047        | 1.000  | 0.531        | 0.969 | 1.000        | 0.969        | 0.953        | 0.656     | 0.844        | 0.750       | 1.000        | 1.000        | 0.891        | <b>0.984</b> | <b>0.984</b>      | 0.812             | 0.734             | 1.000             | 0.766             | 0.938             |
|           | Acc.2    | <b>0.984</b> | 1.000  | 0.922        | 1.000 | 1.000        | 1.000        | <b>0.984</b> | 0.938     | <b>0.984</b> | 1.000       | 1.000        | 1.000        | <b>0.984</b> | 1.000        | 1.000             | 1.000             | 0.969             | 1.000             | <b>0.984</b>      | 1.000             |
| Asub-002B | $\kappa$ | nan          | nan    | nan          | nan   | nan          | nan          | nan          | nan       | nan          | nan         | nan          | nan          | nan          | nan          | nan               | nan               | nan               | nan               | nan               | nan               |
|           | AUC      | nan          | nan    | nan          | nan   | nan          | nan          | nan          | nan       | nan          | nan         | nan          | nan          | nan          | nan          | nan               | nan               | nan               | nan               | nan               | nan               |
|           | Acc.1    | 0.330        | 0.645  | 0.456        | 0.583 | 0.504        | 0.379        | 0.378        | 0.519     | 0.686        | 0.504       | 0.590        | 0.377        | 0.519        | <b>0.662</b> | 0.565             | 0.164             | 0.589             | 0.321             | 0.456             | 0.173             |
|           | Acc.2    | 0.748        | 0.906  | 0.897        | 0.827 | 0.795        | 0.819        | 0.827        | 0.906     | 0.898        | 0.921       | 0.779        | <b>0.937</b> | 0.787        | 1.000        | 0.889             | 0.565             | 0.889             | 0.542             | 0.778             | 0.644             |
| Asub-003B | $\kappa$ | nan          | nan    | nan          | nan   | nan          | nan          | nan          | nan       | nan          | nan         | nan          | nan          | nan          | nan          | nan               | nan               | nan               | nan               | nan               | nan               |
|           | AUC      | nan          | nan    | nan          | nan   | nan          | nan          | nan          | nan       | nan          | nan         | nan          | nan          | nan          | nan          | nan               | nan               | nan               | nan               | nan               | nan               |
|           | Acc.1    | 0.000        | 0.429  | 0.000        | 0.190 | 0.857        | <b>0.714</b> | 0.190        | 0.333     | 0.857        | 0.333       | 0.095        | 0.381        | 0.095        | 0.524        | 0.333             | 0.000             | <b>0.714</b>      | 0.524             | 0.238             | 0.000             |
|           | Acc.2    | 0.095        | 0.571  | 0.571        | 0.381 | <b>0.952</b> | <b>0.952</b> | 0.714        | 0.762     | 1.000        | 0.905       | 0.429        | 0.619        | 1.000        | 1.000        | 1.000             | 0.190             | 1.000             | 0.810             | 0.524             | 0.857             |
| Asub-004B | $\kappa$ | nan          | nan    | nan          | nan   | nan          | nan          | nan          | nan       | nan          | nan         | nan          | nan          | nan          | nan          | nan               | nan               | nan               | nan               | nan               | nan               |
|           | AUC      | nan          | nan    | nan          | nan   | nan          | nan          | nan          | nan       | nan          | nan         | nan          | nan          | nan          | nan          | nan               | nan               | nan               | nan               | nan               | nan               |
|           | Acc.1    | 0.214        | 0.744  | 0.677        | 0.786 | 0.789        | 0.691        | 0.953        | 0.583     | 0.871        | 0.775       | 0.891        | 0.775        | 1.000        | 0.902        | 0.951             | 0.902             | 1.000             | <b>0.967</b>      | 0.902             | 0.853             |
|           | Acc.2    | 1.000        | 1.000  | 0.951        | 0.967 | 1.000        | 0.967        | 1.000        | 0.886     | <b>0.984</b> | 0.951       | <b>0.984</b> | 1.000        | 1.000        | 1.000        | 1.000             | 1.000             | 1.000             | 1.000             | 1.000             | 1.000             |
| Asub-005B | $\kappa$ | nan          | nan    | nan          | nan   | nan          | nan          | nan          | nan       | nan          | nan         | nan          | nan          | nan          | nan          | nan               | nan               | nan               | nan               | nan               | nan               |
|           | AUC      | nan          | nan    | nan          | nan   | nan          | nan          | nan          | nan       | nan          | nan         | nan          | nan          | nan          | nan          | nan               | nan               | nan               | nan               | nan               | nan               |
|           | Acc.1    | 0.209        | 0.848  | 0.984        | 0.709 | 0.541        | 0.864        | 0.861        | 0.631     | 0.739        | 0.638       | <b>0.908</b> | 0.716        | 0.510        | 0.746        | 0.685             | 0.669             | 0.793             | 0.678             | 0.570             | 0.815             |
|           | Acc.2    | 0.511        | 1.000  | 1.000        | 0.901 | 0.878        | 0.977        | 0.977        | 0.892     | 1.000        | 0.953       | 1.000        | <b>0.984</b> | 1.000        | 1.000        | 1.000             | 1.000             | <b>0.984</b>      | 0.962             | 1.000             | 1.000             |
| Asub-006B | $\kappa$ | nan          | nan    | nan          | nan   | nan          | nan          | nan          | nan       | nan          | nan         | nan          | nan          | nan          | nan          | nan               | nan               | nan               | nan               | nan               | nan               |
|           | AUC      | nan          | nan    | nan          | nan   | nan          | nan          | nan          | nan       | nan          | nan         | nan          | nan          | nan          | nan          | nan               | nan               | nan               | nan               | nan               | nan               |
|           | Acc.1    | 0.094        | 0.172  | <b>0.491</b> | 0.094 | 0.016        | 0.078        | 0.217        | 0.416     | 0.109        | 0.307       | 0.094        | 0.634        | 0.094        | 0.371        | 0.433             | 0.000             | 0.372             | 0.062             | 0.062             | 0.062             |
|           | Acc.2    | 0.544        | 0.311  | 0.784        | 0.188 | 0.264        | 0.375        | 0.494        | 0.831     | <b>0.908</b> | 0.599       | 0.540        | 0.848        | 0.585        | 0.953        | 0.740             | 0.203             | 0.803             | 0.388             | 0.599             | 0.203             |

Continued on next page

| Subject      | Metric   | DeepConvnet  | EEGNet | Conformer    | CTNet | BIOT (f) | BIOT (l) | BENDR (f)    | BENDR (l)    | CBraMod (f)  | CBraMod (l)  | EEGPT (f) | EEGPT (l)    | LaBraM (f) | LaBraM (l)   | STEGformer-s (j) | STEGformer-s (l) | STEGformer-b (j) | STEGformer-b (l) | STEGformer-l (j) | STEGformer-l (l) |
|--------------|----------|--------------|--------|--------------|-------|----------|----------|--------------|--------------|--------------|--------------|-----------|--------------|------------|--------------|------------------|------------------|------------------|------------------|------------------|------------------|
|              |          |              |        |              |       |          |          |              |              |              |              |           |              |            |              |                  |                  |                  |                  |                  |                  |
| Asub-007BAcc | $\kappa$ | nan          | nan    | nan          | nan   | nan      | nan      | nan          | nan          | nan          | nan          | nan       | nan          | nan        | nan          | nan              | nan              | nan              | nan              | nan              | nan              |
|              | AUC      | nan          | nan    | nan          | nan   | nan      | nan      | nan          | nan          | nan          | nan          | nan       | nan          | nan        | nan          | nan              | nan              | nan              | nan              | nan              | nan              |
|              | Acc.1    | 0.863        | 0.909  | 0.297        | 0.919 | 0.809    | 0.959    | 0.838        | 0.675        | 0.909        | 0.831        | 0.944     | 0.356        | 0.597      | <b>0.950</b> | 0.425            | 0.869            | 0.591            | 0.959            | 0.825            | 0.878            |
| Asub-008BAcc | Acc.2    | 1.000        | 0.975  | 0.959        | 1.000 | 1.000    | 1.000    | <b>0.984</b> | 0.919        | 1.000        | <b>0.984</b> | 1.000     | 1.000        | 1.000      | 1.000        | <b>0.984</b>     | 1.000            | 1.000            | 1.000            | 1.000            | 1.000            |
|              | $\kappa$ | nan          | nan    | nan          | nan   | nan      | nan      | nan          | nan          | nan          | nan          | nan       | nan          | nan        | nan          | nan              | nan              | nan              | nan              | nan              | nan              |
|              | AUC      | nan          | nan    | nan          | nan   | nan      | nan      | nan          | nan          | nan          | nan          | nan       | nan          | nan        | nan          | nan              | nan              | nan              | nan              | nan              | nan              |
| Asub-009BAcc | Acc.1    | 0.439        | 0.507  | 0.776        | 0.693 | 0.415    | 0.624    | 0.648        | 0.575        | 0.831        | 0.577        | 1.000     | 0.930        | 0.854      | 0.923        | <b>0.938</b>     | 1.000            | 0.930            | 1.000            | 0.892            | 1.000            |
|              | Acc.2    | 0.730        | 0.852  | 1.000        | 0.938 | 0.759    | 0.885    | 1.000        | 0.876        | 0.953        | 0.977        | 1.000     | <b>0.984</b> | 1.000      | 1.000        | 0.953            | 1.000            | 1.000            | 1.000            | 1.000            | 1.000            |
|              | $\kappa$ | nan          | nan    | nan          | nan   | nan      | nan      | nan          | nan          | nan          | nan          | nan       | nan          | nan        | nan          | nan              | nan              | nan              | nan              | nan              | nan              |
| Asub-010BAcc | AUC      | nan          | nan    | nan          | nan   | nan      | nan      | nan          | nan          | nan          | nan          | nan       | nan          | nan        | nan          | nan              | nan              | nan              | nan              | nan              | nan              |
|              | Acc.1    | 0.734        | 1.000  | 0.677        | 1.000 | 0.953    | 0.780    | 0.307        | 0.479        | <b>0.984</b> | 0.693        | 0.733     | 0.283        | 0.969      | 0.599        | 0.891            | 0.323            | 0.623            | 0.882            | 0.875            | 0.726            |
|              | Acc.2    | <b>0.984</b> | 1.000  | <b>0.984</b> | 1.000 | 1.000    | 1.000    | 0.882        | 0.731        | <b>0.984</b> | 0.913        | 1.000     | 1.000        | 1.000      | <b>0.984</b> | 1.000            | 1.000            | 0.851            | 1.000            | <b>0.984</b>     | 1.000            |
| Asub-011BAcc | $\kappa$ | nan          | nan    | nan          | nan   | nan      | nan      | nan          | nan          | nan          | nan          | nan       | nan          | nan        | nan          | nan              | nan              | nan              | nan              | nan              | nan              |
|              | AUC      | nan          | nan    | nan          | nan   | nan      | nan      | nan          | nan          | nan          | nan          | nan       | nan          | nan        | nan          | nan              | nan              | nan              | nan              | nan              | nan              |
|              | Acc.1    | 0.021        | 0.280  | 0.000        | 0.271 | 0.130    | 0.295    | 0.140        | <b>0.572</b> | 0.416        | 0.418        | 0.187     | 0.010        | 0.087      | 0.841        | 0.408            | 0.258            | 0.298            | 0.505            | 0.324            | 0.502            |
| Asub-012BAcc | Acc.2    | 0.431        | 0.503  | 0.562        | 0.498 | 0.538    | 0.678    | 0.558        | 0.855        | 0.786        | 0.749        | 0.533     | 0.228        | 0.544      | 1.000        | 0.812            | 0.732            | 0.584            | 0.856            | 0.608            | <b>0.902</b>     |
|              | $\kappa$ | nan          | nan    | nan          | nan   | nan      | nan      | nan          | nan          | nan          | nan          | nan       | nan          | nan        | nan          | nan              | nan              | nan              | nan              | nan              | nan              |
|              | AUC      | nan          | nan    | nan          | nan   | nan      | nan      | nan          | nan          | nan          | nan          | nan       | nan          | nan        | nan          | nan              | nan              | nan              | nan              | nan              | nan              |
| Asub-013BAcc | Acc.1    | 0.709        | 0.600  | 0.828        | 0.756 | 0.416    | 0.403    | 0.588        | 0.453        | 0.516        | 0.356        | 0.369     | 0.409        | 0.122      | <b>0.803</b> | 0.556            | 0.222            | 0.584            | 0.537            | 0.428            | 0.322            |
|              | Acc.2    | 0.925        | 0.925  | 0.975        | 0.975 | 0.625    | 0.778    | 0.903        | 0.869        | <b>0.953</b> | 0.738        | 0.856     | 0.919        | 0.456      | 0.925        | 0.844            | 0.806            | 0.950            | 0.975            | 0.769            | 0.759            |
|              | $\kappa$ | nan          | nan    | nan          | nan   | nan      | nan      | nan          | nan          | nan          | nan          | nan       | nan          | nan        | nan          | nan              | nan              | nan              | nan              | nan              | nan              |
| Asub-014BAcc | AUC      | nan          | nan    | nan          | nan   | nan      | nan      | nan          | nan          | nan          | nan          | nan       | nan          | nan        | nan          | nan              | nan              | nan              | nan              | nan              | nan              |
|              | Acc.1    | 0.290        | 0.188  | 0.321        | 0.174 | 0.129    | 0.132    | 0.375        | <b>0.578</b> | 0.661        | 0.310        | 0.299     | 0.266        | 0.453      | 0.100        | 0.114            | 0.000            | 0.103            | 0.085            | 0.087            | 0.000            |
|              | Acc.2    | 0.920        | 0.783  | 0.837        | 0.826 | 0.748    | 0.560    | 0.688        | 0.929        | 0.922        | 0.766        | 0.866     | <b>0.984</b> | 1.000      | 0.853        | 0.846            | 0.473            | 0.938            | 0.540            | 1.000            | 0.542            |
| Asub-015BAcc | $\kappa$ | nan          | nan    | nan          | nan   | nan      | nan      | nan          | nan          | nan          | nan          | nan       | nan          | nan        | nan          | nan              | nan              | nan              | nan              | nan              | nan              |
|              | AUC      | nan          | nan    | nan          | nan   | nan      | nan      | nan          | nan          | nan          | nan          | nan       | nan          | nan        | nan          | nan              | nan              | nan              | nan              | nan              | nan              |
|              | Acc.1    | nan          | nan    | nan          | nan   | nan      | nan      | nan          | nan          | nan          | nan          | nan       | nan          | nan        | nan          | nan              | nan              | nan              | nan              | nan              | nan              |

Continued on next page

| Subject                | Metric   | DeepConvnet | EEGNet       | Conformer    | CTNet        | BIOT (f)     | BIOT (l)     | BENDR (f)    | BENDR (l) | CBraMod (f)  | CBraMod (l)  | EEGPT (f)    | EEGPT (l) | LaBraM (f) | LaBraM (l)   | STEGformer-s (f) | STEGformer-s (l) | STEGformer-b (f) | STEGformer-b (l) | STEGformer-l (f) | STEGformer-l (l) |
|------------------------|----------|-------------|--------------|--------------|--------------|--------------|--------------|--------------|-----------|--------------|--------------|--------------|-----------|------------|--------------|------------------|------------------|------------------|------------------|------------------|------------------|
|                        |          |             |              |              |              |              |              |              |           |              |              |              |           |            |              |                  |                  |                  |                  |                  |                  |
|                        | Acc.1    | 0.573       | 0.896        | 0.589        | 0.776        | 0.964        | 0.625        | 0.698        | 0.490     | 0.750        | 0.380        | 0.802        | 0.552     | 0.682      | 0.922        | <b>0.943</b>     | 0.875            | 0.964            | 0.807            | 0.891            | 0.938            |
|                        | Acc.2    | 0.943       | 0.979        | 0.891        | 0.958        | 1.000        | <b>0.984</b> | 0.964        | 0.839     | 0.932        | 0.781        | 0.958        | 0.865     | 0.823      | 0.969        | 0.979            | <b>0.984</b>     | <b>0.984</b>     | 1.000            | 1.000            | 1.000            |
| Asub-014BAcc           | $\kappa$ | nan         | nan          | nan          | nan          | nan          | nan          | nan          | nan       | nan          | nan          | nan          | nan       | nan        | nan          | nan              | nan              | nan              | nan              | nan              | nan              |
|                        | AUC      | nan         | nan          | nan          | nan          | nan          | nan          | nan          | nan       | nan          | nan          | nan          | nan       | nan        | nan          | nan              | nan              | nan              | nan              | nan              | nan              |
|                        | Acc.1    | 0.969       | 0.842        | 0.603        | 0.906        | 0.764        | 0.857        | 0.827        | 0.666     | 0.700        | 0.493        | 0.953        | 0.904     | 0.795      | 0.953        | 1.000            | 0.937            | <b>0.984</b>     | 0.921            | <b>0.984</b>     | 0.683            |
|                        | Acc.2    | 1.000       | 0.984        | 0.984        | <b>0.984</b> | 0.921        | 1.000        | 0.984        | 0.889     | 1.000        | 0.905        | 1.000        | 1.000     | 1.000      | 1.000        | 1.000            | 1.000            | 1.000            | 1.000            | 1.000            | <b>0.984</b>     |
| Asub-015BAcc           | $\kappa$ | nan         | nan          | nan          | nan          | nan          | nan          | nan          | nan       | nan          | nan          | nan          | nan       | nan        | nan          | nan              | nan              | nan              | nan              | nan              | nan              |
|                        | AUC      | nan         | nan          | nan          | nan          | nan          | nan          | nan          | nan       | nan          | nan          | nan          | nan       | nan        | nan          | nan              | nan              | nan              | nan              | nan              | nan              |
|                        | Acc.1    | 0.747       | 0.773        | 0.851        | 0.656        | 0.851        | 0.327        | 0.211        | 0.495     | 0.617        | 0.265        | 0.325        | 0.225     | 0.279      | 0.726        | <b>0.803</b>     | 0.017            | 0.564            | 0.066            | 0.166            | 0.017            |
|                        | Acc.2    | 0.905       | 0.952        | 0.966        | <b>0.969</b> | 1.000        | 0.689        | 0.599        | 0.822     | <b>0.969</b> | 0.703        | 0.588        | 0.516     | 0.721      | 1.000        | 1.000            | 0.161            | 0.886            | 0.192            | 0.784            | 0.208            |
| Asub-016BAcc           | $\kappa$ | nan         | nan          | nan          | nan          | nan          | nan          | nan          | nan       | nan          | nan          | nan          | nan       | nan        | nan          | nan              | nan              | nan              | nan              | nan              | nan              |
|                        | AUC      | nan         | nan          | nan          | nan          | nan          | nan          | nan          | nan       | nan          | nan          | nan          | nan       | nan        | nan          | nan              | nan              | nan              | nan              | nan              | nan              |
|                        | Acc.1    | 1.000       | <b>0.990</b> | 0.594        | 0.979        | 0.740        | 0.906        | 0.604        | 0.708     | 0.906        | 0.812        | 0.792        | 0.979     | 0.958      | 0.948        | 1.000            | 1.000            | <b>0.990</b>     | 0.948            | <b>0.990</b>     | <b>0.990</b>     |
|                        | Acc.2    | 1.000       | 1.000        | <b>0.990</b> | 1.000        | 0.979        | 0.979        | 1.000        | 0.938     | 1.000        | 1.000        | 1.000        | 1.000     | 1.000      | 1.000        | 1.000            | 1.000            | 1.000            | 1.000            | 1.000            | 1.000            |
| Asub-017BAcc           | $\kappa$ | nan         | nan          | nan          | nan          | nan          | nan          | nan          | nan       | nan          | nan          | nan          | nan       | nan        | nan          | nan              | nan              | nan              | nan              | nan              | nan              |
|                        | AUC      | nan         | nan          | nan          | nan          | nan          | nan          | nan          | nan       | nan          | nan          | nan          | nan       | nan        | nan          | nan              | nan              | nan              | nan              | nan              | nan              |
|                        | Acc.1    | 0.554       | 0.969        | 0.795        | 0.933        | <b>0.980</b> | 0.902        | 0.933        | 0.679     | 0.933        | 0.731        | 0.969        | 0.969     | 1.000      | <b>0.980</b> | 1.000            | 1.000            | 1.000            | 1.000            | 1.000            | 1.000            |
|                        | Acc.2    | 1.000       | <b>0.984</b> | <b>0.984</b> | 1.000        | 1.000        | <b>0.984</b> | 1.000        | 0.924     | 1.000        | <b>0.984</b> | 1.000        | 1.000     | 1.000      | 1.000        | 1.000            | 1.000            | 1.000            | 1.000            | 1.000            | 1.000            |
| Asub-018BAcc           | $\kappa$ | nan         | nan          | nan          | nan          | nan          | nan          | nan          | nan       | nan          | nan          | nan          | nan       | nan        | nan          | nan              | nan              | nan              | nan              | nan              | nan              |
|                        | AUC      | nan         | nan          | nan          | nan          | nan          | nan          | nan          | nan       | nan          | nan          | nan          | nan       | nan        | nan          | nan              | nan              | nan              | nan              | nan              | nan              |
|                        | Acc.1    | 1.000       | 1.000        | 1.000        | 1.000        | 0.949        | <b>0.984</b> | 0.877        | 0.574     | 0.953        | 0.688        | <b>0.984</b> | 0.611     | 0.980      | 0.795        | 1.000            | 1.000            | 1.000            | 1.000            | 1.000            | 1.000            |
|                        | Acc.2    | 1.000       | 1.000        | 1.000        | 1.000        | 1.000        | 1.000        | <b>0.984</b> | 0.858     | <b>0.984</b> | 0.909        | 1.000        | 0.869     | 1.000      | 1.000        | 1.000            | 1.000            | 1.000            | 1.000            | 1.000            | 1.000            |
| Asub-019BAcc           | $\kappa$ | nan         | nan          | nan          | nan          | nan          | nan          | nan          | nan       | nan          | nan          | nan          | nan       | nan        | nan          | nan              | nan              | nan              | nan              | nan              | nan              |
|                        | AUC      | nan         | nan          | nan          | nan          | nan          | nan          | nan          | nan       | nan          | nan          | nan          | nan       | nan        | nan          | nan              | nan              | nan              | nan              | nan              | nan              |
|                        | Acc.1    | 0.404       | 0.730        | 0.691        | 0.733        | 0.488        | 0.406        | 0.401        | 0.611     | 0.952        | 0.564        | 0.097        | 0.389     | 0.289      | <b>0.902</b> | 0.080            | 0.207            | 0.295            | 0.307            | 0.356            | 0.417            |
|                        | Acc.2    | 0.803       | <b>0.983</b> | 0.967        | 1.000        | 0.763        | 0.791        | 0.691        | 0.808     | 1.000        | 0.968        | 0.403        | 0.792     | 0.904      | 1.000        | 0.491            | 0.674            | 0.636            | 0.743            | 0.730            | 0.933            |
| Continued on next page |          |             |              |              |              |              |              |              |           |              |              |              |           |            |              |                  |                  |                  |                  |                  |                  |

174  
175  
176  
177  
178  
179  
180  
181  
182  
183  
184  
185  
186  
187  
188  
189  
190  
191  
192  
193  
194  
195  
196  
197  
198  
199  
200  
201  
202  
203  
204  
205  
206

| Subject      | Metric   | DeepConvnet  | EEGNet | Conformer    | CTNet | BIOT (f) | BIOT (l)     | BENDR (f) | BENDR (l)    | CBraMod (f) | CBraMod (l)  | EEGPT (f) | EEGPT (l)    | LaBraM (f) | LaBraM (l)   | STEGformer-s (f) | STEGformer-s (l) | STEGformer-b (f) | STEGformer-b (l) | STEGformer-l (f) | STEGformer-l (l) |
|--------------|----------|--------------|--------|--------------|-------|----------|--------------|-----------|--------------|-------------|--------------|-----------|--------------|------------|--------------|------------------|------------------|------------------|------------------|------------------|------------------|
| Asub-020BAcc | $\kappa$ | nan          | nan    | nan          | nan   | nan      | nan          | nan       | nan          | nan         | nan          | nan       | nan          | nan        | nan          | nan              | nan              | nan              | nan              | nan              | nan              |
|              | AUC      | nan          | nan    | nan          | nan   | nan      | nan          | nan       | nan          | nan         | nan          | nan       | nan          | nan        | nan          | nan              | nan              | nan              | nan              | nan              | nan              |
|              | Acc.1    | 0.748        | 0.950  | 0.465        | 0.930 | 0.653    | 0.761        | 0.721     | 0.659        | 0.918       | 0.775        | 0.965     | <b>0.981</b> | 0.903      | 0.864        | 0.873            | 0.704            | 0.888            | 0.895            | 0.776            | 1.000            |
| Asub-021BAcc | Acc.2    | <b>0.984</b> | 1.000  | 0.953        | 1.000 | 1.000    | 0.981        | 1.000     | 0.938        | 0.981       | 0.950        | 1.000     | 1.000        | 1.000      | <b>0.984</b> | 1.000            | 0.962            | 1.000            | 1.000            | 0.962            | 1.000            |
|              | $\kappa$ | nan          | nan    | nan          | nan   | nan      | nan          | nan       | nan          | nan         | nan          | nan       | nan          | nan        | nan          | nan              | nan              | nan              | nan              | nan              | nan              |
|              | AUC      | nan          | nan    | nan          | nan   | nan      | nan          | nan       | nan          | nan         | nan          | nan       | nan          | nan        | nan          | nan              | nan              | nan              | nan              | nan              | nan              |
| Asub-022BAcc | Acc.1    | 0.111        | 0.597  | 0.096        | 0.324 | 0.128    | 0.617        | 0.565     | 0.646        | 0.494       | 0.596        | 0.968     | <b>0.950</b> | 0.192      | 0.858        | 0.047            | 0.276            | 0.094            | 0.662            | 0.078            | 0.810            |
|              | Acc.2    | 0.901        | 0.934  | 0.659        | 0.771 | 0.335    | 0.969        | 0.759     | 0.919        | 1.000       | <b>0.984</b> | 1.000     | 1.000        | 1.000      | 1.000        | 0.404            | 0.967            | <b>0.984</b>     | 0.920            | 0.840            | <b>0.984</b>     |
|              | $\kappa$ | nan          | nan    | nan          | nan   | nan      | nan          | nan       | nan          | nan         | nan          | nan       | nan          | nan        | nan          | nan              | nan              | nan              | nan              | nan              | nan              |
| Asub-023BAcc | AUC      | nan          | nan    | nan          | nan   | nan      | nan          | nan       | nan          | nan         | nan          | nan       | nan          | nan        | nan          | nan              | nan              | nan              | nan              | nan              | nan              |
|              | Acc.1    | 0.461        | 0.878  | 0.427        | 0.545 | 0.863    | 0.741        | 0.910     | 0.458        | 0.713       | 0.274        | 0.816     | 0.751        | 0.922      | 0.688        | 0.969            | 0.797            | <b>0.938</b>     | 0.828            | 0.906            | 0.812            |
|              | Acc.2    | 0.938        | 1.000  | 0.953        | 0.969 | 1.000    | <b>0.984</b> | 1.000     | 0.804        | 1.000       | 0.872        | 1.000     | 1.000        | 1.000      | 1.000        | 1.000            | 1.000            | 1.000            | 1.000            | 1.000            | 1.000            |
| Asub-024BAcc | $\kappa$ | nan          | nan    | nan          | nan   | nan      | nan          | nan       | nan          | nan         | nan          | nan       | nan          | nan        | nan          | nan              | nan              | nan              | nan              | nan              | nan              |
|              | AUC      | nan          | nan    | nan          | nan   | nan      | nan          | nan       | nan          | nan         | nan          | nan       | nan          | nan        | nan          | nan              | nan              | nan              | nan              | nan              | nan              |
|              | Acc.1    | 1.000        | 1.000  | <b>0.974</b> | 1.000 | 1.000    | 0.900        | 1.000     | 0.749        | 1.000       | 0.571        | 1.000     | <b>0.974</b> | 1.000      | 0.817        | 1.000            | 1.000            | 1.000            | 1.000            | 1.000            | 1.000            |
| Asub-025BAcc | Acc.2    | 1.000        | 1.000  | 1.000        | 1.000 | 1.000    | 1.000        | 1.000     | <b>0.911</b> | 1.000       | 1.000        | 1.000     | 1.000        | 1.000      | 1.000        | 1.000            | 1.000            | 1.000            | 1.000            | 1.000            | 1.000            |
|              | $\kappa$ | nan          | nan    | nan          | nan   | nan      | nan          | nan       | nan          | nan         | nan          | nan       | nan          | nan        | nan          | nan              | nan              | nan              | nan              | nan              | nan              |
|              | AUC      | nan          | nan    | nan          | nan   | nan      | nan          | nan       | nan          | nan         | nan          | nan       | nan          | nan        | nan          | nan              | nan              | nan              | nan              | nan              | nan              |
| Asub-026BAcc | Acc.1    | 0.114        | 0.033  | 0.131        | 0.131 | 0.065    | 0.147        | 0.116     | 0.290        | 0.198       | <b>0.363</b> | 0.147     | 0.049        | 0.147      | 0.693        | 0.116            | 0.049            | 0.082            | 0.049            | 0.049            | 0.016            |
|              | Acc.2    | 0.292        | 0.131  | 0.325        | 0.180 | 0.554    | 0.227        | 0.309     | 0.755        | 0.521       | 0.650        | 0.276     | 0.165        | 0.668      | 1.000        | 0.539            | 0.280            | <b>0.777</b>     | 0.131            | 0.082            | 0.309            |
|              | $\kappa$ | nan          | nan    | nan          | nan   | nan      | nan          | nan       | nan          | nan         | nan          | nan       | nan          | nan        | nan          | nan              | nan              | nan              | nan              | nan              | nan              |
| Asub-026BAcc | AUC      | nan          | nan    | nan          | nan   | nan      | nan          | nan       | nan          | nan         | nan          | nan       | nan          | nan        | nan          | nan              | nan              | nan              | nan              | nan              | nan              |
|              | Acc.1    | nan          | nan    | nan          | nan   | nan      | nan          | nan       | nan          | nan         | nan          | nan       | nan          | nan        | nan          | nan              | nan              | nan              | nan              | nan              | nan              |

Continued on next page

Continued on next page

| Subject      | Metric   | DeepConvnet  | EEGNet       | Conformer    | CTNet        | BIOT (f)     | BIOT (l)     | BENDR (f)    | BENDR (l)    | CBraMod (f)  | CBraMod (l)  | EEGPT (f) | EEGPT (l)    | LaBraM (f) | LaBraM (l)   | STEGformer-s (f) | STEGformer-s (l) | STEGformer-b (f) | STEGformer-b (l) | STEGformer-l (f) | STEGformer-l (l) |
|--------------|----------|--------------|--------------|--------------|--------------|--------------|--------------|--------------|--------------|--------------|--------------|-----------|--------------|------------|--------------|------------------|------------------|------------------|------------------|------------------|------------------|
|              |          |              |              |              |              |              |              |              |              |              |              |           |              |            |              |                  |                  |                  |                  |                  |                  |
|              | Acc.1    | 0.469        | 0.834        | 0.537        | 0.588        | 0.671        | 0.751        | 0.753        | 0.626        | 0.731        | 0.651        | 0.966     | 0.817        | 0.668      | 0.934        | 0.848            | <b>0.967</b>     | 0.832            | 0.984            | 0.602            | 0.900            |
|              | Acc.2    | 0.652        | <b>0.984</b> | 0.850        | 0.753        | 1.000        | 0.869        | 0.915        | 0.936        | 0.948        | 1.000        | 1.000     | 0.983        | 0.915      | 1.000        | 1.000            | 1.000            | 1.000            | 1.000            | 0.934            | 1.000            |
| Asub-027BAcc | $\kappa$ | nan          | nan          | nan          | nan          | nan          | nan          | nan          | nan          | nan          | nan          | nan       | nan          | nan        | nan          | nan              | nan              | nan              | nan              | nan              | nan              |
|              | AUC      | nan          | nan          | nan          | nan          | nan          | nan          | nan          | nan          | nan          | nan          | nan       | nan          | nan        | nan          | nan              | nan              | nan              | nan              | nan              | nan              |
|              | Acc.1    | 1.000        | 1.000        | 1.000        | 1.000        | 1.000        | 0.917        | 1.000        | 0.672        | 0.958        | 0.740        | 1.000     | 1.000        | 1.000      | <b>0.979</b> | 1.000            | 1.000            | 1.000            | 1.000            | 1.000            | 1.000            |
|              | Acc.2    | 1.000        | 1.000        | 1.000        | 1.000        | 1.000        | 1.000        | 1.000        | 0.932        | 1.000        | <b>0.984</b> | 1.000     | 1.000        | 1.000      | 1.000        | 1.000            | 1.000            | 1.000            | 1.000            | 1.000            | 1.000            |
| Asub-028BAcc | $\kappa$ | nan          | nan          | nan          | nan          | nan          | nan          | nan          | nan          | nan          | nan          | nan       | nan          | nan        | nan          | nan              | nan              | nan              | nan              | nan              | nan              |
|              | AUC      | nan          | nan          | nan          | nan          | nan          | nan          | nan          | nan          | nan          | nan          | nan       | nan          | nan        | nan          | nan              | nan              | nan              | nan              | nan              | nan              |
|              | Acc.1    | 1.000        | 1.000        | 0.823        | 1.000        | 1.000        | 0.711        | 0.978        | 0.579        | 1.000        | 0.617        | 1.000     | <b>0.984</b> | 1.000      | 0.894        | 1.000            | 1.000            | 1.000            | 1.000            | 1.000            | 1.000            |
|              | Acc.2    | 1.000        | 1.000        | 1.000        | 1.000        | 1.000        | 1.000        | 1.000        | <b>0.863</b> | 1.000        | 1.000        | 1.000     | 1.000        | 1.000      | 1.000        | 1.000            | 1.000            | 1.000            | 1.000            | 1.000            | 1.000            |
| Asub-029BAcc | $\kappa$ | nan          | nan          | nan          | nan          | nan          | nan          | nan          | nan          | nan          | nan          | nan       | nan          | nan        | nan          | nan              | nan              | nan              | nan              | nan              | nan              |
|              | AUC      | nan          | nan          | nan          | nan          | nan          | nan          | nan          | nan          | nan          | nan          | nan       | nan          | nan        | nan          | nan              | nan              | nan              | nan              | nan              | nan              |
|              | Acc.1    | 1.000        | 1.000        | <b>0.984</b> | <b>0.984</b> | 0.847        | <b>0.984</b> | 0.972        | 0.531        | 0.925        | 0.689        | 1.000     | 1.000        | 1.000      | <b>0.984</b> | 1.000            | 1.000            | 1.000            | 1.000            | 1.000            | 1.000            |
|              | Acc.2    | 1.000        | 1.000        | 1.000        | 1.000        | 1.000        | 1.000        | 1.000        | 0.858        | 1.000        | <b>0.972</b> | 1.000     | 1.000        | 1.000      | 1.000        | 1.000            | 1.000            | 1.000            | 1.000            | 1.000            | 1.000            |
| Asub-030BAcc | $\kappa$ | nan          | nan          | nan          | nan          | nan          | nan          | nan          | nan          | nan          | nan          | nan       | nan          | nan        | nan          | nan              | nan              | nan              | nan              | nan              | nan              |
|              | AUC      | nan          | nan          | nan          | nan          | nan          | nan          | nan          | nan          | nan          | nan          | nan       | nan          | nan        | nan          | nan              | nan              | nan              | nan              | nan              | nan              |
|              | Acc.1    | <b>0.969</b> | <b>0.969</b> | 1.000        | 0.953        | 1.000        | 0.906        | <b>0.969</b> | 0.544        | 0.906        | 0.603        | 1.000     | 0.953        | 1.000      | 1.000        | 1.000            | 1.000            | 1.000            | 1.000            | 1.000            | 1.000            |
|              | Acc.2    | 1.000        | 1.000        | 1.000        | 1.000        | 1.000        | <b>0.984</b> | 1.000        | 0.722        | <b>0.984</b> | 0.969        | 1.000     | 1.000        | 1.000      | 1.000        | 1.000            | 1.000            | 1.000            | 1.000            | 1.000            | 1.000            |
| Asub-031BAcc | $\kappa$ | nan          | nan          | nan          | nan          | nan          | nan          | nan          | nan          | nan          | nan          | nan       | nan          | nan        | nan          | nan              | nan              | nan              | nan              | nan              | nan              |
|              | AUC      | nan          | nan          | nan          | nan          | nan          | nan          | nan          | nan          | nan          | nan          | nan       | nan          | nan        | nan          | nan              | nan              | nan              | nan              | nan              | nan              |
|              | Acc.1    | 0.171        | 0.177        | 0.167        | 0.296        | <b>0.518</b> | 0.135        | 0.167        | 0.472        | 0.212        | 0.238        | 0.161     | 0.042        | 0.083      | 0.736        | 0.052            | 0.224            | 0.125            | 0.307            | 0.115            | 0.192            |
|              | Acc.2    | 0.462        | 0.674        | 0.416        | 0.716        | 0.849        | 0.534        | 0.473        | 0.803        | 0.731        | <b>0.964</b> | 0.746     | 0.416        | 0.352      | 1.000        | 0.460            | 0.663            | 0.373            | 0.808            | 0.369            | 0.958            |
| Asub-032BAcc | $\kappa$ | nan          | nan          | nan          | nan          | nan          | nan          | nan          | nan          | nan          | nan          | nan       | nan          | nan        | nan          | nan              | nan              | nan              | nan              | nan              | nan              |
|              | AUC      | nan          | nan          | nan          | nan          | nan          | nan          | nan          | nan          | nan          | nan          | nan       | nan          | nan        | nan          | nan              | nan              | nan              | nan              | nan              | nan              |
|              | Acc.1    | 0.897        | <b>0.924</b> | 0.873        | 0.822        | 0.762        | 0.791        | 0.826        | 0.517        | 0.699        | 0.548        | 0.949     | 0.949        | 0.806      | 0.664        | 0.826            | 0.862            | 0.897            | 0.949            | 0.893            | 0.811            |
|              | Acc.2    | 1.000        | 1.000        | 0.889        | 0.980        | 0.964        | 0.842        | 0.944        | 0.913        | 0.964        | 0.964        | 1.000     | 1.000        | 0.969      | 1.000        | <b>0.984</b>     | 1.000            | <b>0.984</b>     | 1.000            | 1.000            | 1.000            |

Continued on next page

| Subject                | Metric   | DeepConvnet  | EEGNet       | Conformer    | CTNet        | BIOT (f) | BIOT (l) | BENDR (f)    | BENDR (l) | CBraMod (f)  | CBraMod (l) | EEGPT (f)    | EEGPT (l)    | LaBraM (f) | LaBraM (l) | STEGformer-s (f) | STEGformer-s (l) | STEGformer-b (f) | STEGformer-b (l) | STEGformer-l (f) | STEGformer-l (l) |
|------------------------|----------|--------------|--------------|--------------|--------------|----------|----------|--------------|-----------|--------------|-------------|--------------|--------------|------------|------------|------------------|------------------|------------------|------------------|------------------|------------------|
|                        |          |              |              |              |              |          |          |              |           |              |             |              |              |            |            |                  |                  |                  |                  |                  |                  |
| Asub-033BAcc           | $\kappa$ | nan          | nan          | nan          | nan          | nan      | nan      | nan          | nan       | nan          | nan         | nan          | nan          | nan        | nan        | nan              | nan              | nan              | nan              | nan              | nan              |
|                        | AUC      | nan          | nan          | nan          | nan          | nan      | nan      | nan          | nan       | nan          | nan         | nan          | nan          | nan        | nan        | nan              | nan              | nan              | nan              | nan              | nan              |
|                        | Acc.1    | 0.824        | 0.886        | 0.628        | 0.822        | 0.082    | 0.163    | 0.726        | 0.708     | 0.405        | 0.728       | <b>0.904</b> | 0.984        | 0.423      | 0.534      | 0.229            | 0.000            | 0.163            | 0.409            | 0.532            | 0.180            |
|                        | Acc.2    | <b>0.969</b> | 1.000        | 0.886        | 0.935        | 0.713    | 0.370    | 0.840        | 0.886     | 0.857        | 0.951       | 0.935        | 1.000        | 0.826      | 0.951      | 0.779            | 0.697            | 0.505            | 0.922            | 0.938            | 0.891            |
| Asub-034BAcc           | $\kappa$ | nan          | nan          | nan          | nan          | nan      | nan      | nan          | nan       | nan          | nan         | nan          | nan          | nan        | nan        | nan              | nan              | nan              | nan              | nan              | nan              |
|                        | AUC      | nan          | nan          | nan          | nan          | nan      | nan      | nan          | nan       | nan          | nan         | nan          | nan          | nan        | nan        | nan              | nan              | nan              | nan              | nan              | nan              |
|                        | Acc.1    | 0.917        | <b>0.979</b> | 0.542        | 0.938        | 0.542    | 0.542    | 0.854        | 0.740     | 0.375        | 0.219       | 0.625        | 0.958        | 0.896      | 0.885      | 0.990            | 0.969            | <b>0.979</b>     | 0.896            | 0.625            | 0.854            |
|                        | Acc.2    | 1.000        | 1.000        | <b>0.990</b> | 1.000        | 0.646    | 0.969    | 0.948        | 0.969     | 0.604        | 0.573       | 1.000        | 1.000        | 0.979      | 1.000      | 1.000            | 1.000            | 1.000            | 0.979            | <b>0.990</b>     | <b>0.990</b>     |
| Asub-035BAcc           | $\kappa$ | nan          | nan          | nan          | nan          | nan      | nan      | nan          | nan       | nan          | nan         | nan          | nan          | nan        | nan        | nan              | nan              | nan              | nan              | nan              | nan              |
|                        | AUC      | nan          | nan          | nan          | nan          | nan      | nan      | nan          | nan       | nan          | nan         | nan          | nan          | nan        | nan        | nan              | nan              | nan              | nan              | nan              | nan              |
|                        | Acc.1    | 0.000        | 0.728        | 0.398        | 0.738        | 0.539    | 0.639    | 0.623        | 0.775     | 0.664        | 0.571       | 0.984        | <b>0.953</b> | 0.450      | 0.984      | 0.921            | 0.984            | 0.942            | 0.984            | 0.780            | 0.984            |
|                        | Acc.2    | 0.645        | 1.000        | <b>0.984</b> | <b>0.984</b> | 0.958    | 0.942    | <b>0.984</b> | 0.916     | 0.947        | 0.874       | 1.000        | 1.000        | 1.000      | 1.000      | 1.000            | 1.000            | 1.000            | 1.000            | 1.000            | 1.000            |
| Asub-036BAcc           | $\kappa$ | nan          | nan          | nan          | nan          | nan      | nan      | nan          | nan       | nan          | nan         | nan          | nan          | nan        | nan        | nan              | nan              | nan              | nan              | nan              | nan              |
|                        | AUC      | nan          | nan          | nan          | nan          | nan      | nan      | nan          | nan       | nan          | nan         | nan          | nan          | nan        | nan        | nan              | nan              | nan              | nan              | nan              | nan              |
|                        | Acc.1    | 0.154        | 0.506        | 0.158        | 0.316        | 0.474    | 0.036    | 0.367        | 0.537     | 0.738        | 0.407       | 0.403        | 0.147        | 0.036      | 0.158      | 0.552            | 0.016            | <b>0.584</b>     | 0.118            | 0.430            | 0.229            |
|                        | Acc.2    | 0.383        | 0.909        | 0.806        | 1.000        | 0.949    | 0.715    | 0.731        | 0.940     | <b>0.984</b> | 0.862       | 0.693        | 0.584        | 0.427      | 1.000      | 0.940            | 0.904            | 0.873            | 0.889            | 0.797            | 0.980            |
| Asub-037BAcc           | $\kappa$ | nan          | nan          | nan          | nan          | nan      | nan      | nan          | nan       | nan          | nan         | nan          | nan          | nan        | nan        | nan              | nan              | nan              | nan              | nan              | nan              |
|                        | AUC      | nan          | nan          | nan          | nan          | nan      | nan      | nan          | nan       | nan          | nan         | nan          | nan          | nan        | nan        | nan              | nan              | nan              | nan              | nan              | nan              |
|                        | Acc.1    | 0.319        | 0.463        | 0.091        | 0.425        | 0.734    | 0.366    | 0.319        | 0.409     | 0.328        | 0.441       | 0.516        | 0.294        | 0.716      | 0.113      | 0.631            | 0.897            | 0.759            | <b>0.934</b>     | 0.778            | 0.975            |
|                        | Acc.2    | 0.753        | 0.753        | 0.431        | 0.819        | 1.000    | 0.669    | 0.628        | 0.691     | 0.878        | 0.794       | 0.866        | 0.678        | 0.950      | 0.787      | <b>0.975</b>     | <b>0.975</b>     | 1.000            | 1.000            | <b>0.975</b>     | <b>0.975</b>     |
| Asub-038BAcc           | $\kappa$ | nan          | nan          | nan          | nan          | nan      | nan      | nan          | nan       | nan          | nan         | nan          | nan          | nan        | nan        | nan              | nan              | nan              | nan              | nan              | nan              |
|                        | AUC      | nan          | nan          | nan          | nan          | nan      | nan      | nan          | nan       | nan          | nan         | nan          | nan          | nan        | nan        | nan              | nan              | nan              | nan              | nan              | nan              |
|                        | Acc.1    | <b>0.984</b> | 0.917        | <b>0.984</b> | 0.935        | 0.699    | 0.848    | 0.904        | 0.522     | 0.558        | 0.739       | 0.951        | 0.967        | 0.967      | 0.569      | 0.844            | 0.953            | 0.967            | 1.000            | 0.915            | <b>0.984</b>     |
|                        | Acc.2    | 1.000        | 0.982        | <b>0.984</b> | 1.000        | 1.000    | 0.969    | 0.967        | 0.783     | 0.953        | 0.888       | 1.000        | 1.000        | 1.000      | 0.969      | 1.000            | 1.000            | 1.000            | 1.000            | 1.000            | 1.000            |
| Asub-039BAcc           | $\kappa$ | nan          | nan          | nan          | nan          | nan      | nan      | nan          | nan       | nan          | nan         | nan          | nan          | nan        | nan        | nan              | nan              | nan              | nan              | nan              | nan              |
|                        | AUC      | nan          | nan          | nan          | nan          | nan      | nan      | nan          | nan       | nan          | nan         | nan          | nan          | nan        | nan        | nan              | nan              | nan              | nan              | nan              | nan              |
|                        | Acc.1    | nan          | nan          | nan          | nan          | nan      | nan      | nan          | nan       | nan          | nan         | nan          | nan          | nan        | nan        | nan              | nan              | nan              | nan              | nan              | nan              |
|                        | Acc.2    | nan          | nan          | nan          | nan          | nan      | nan      | nan          | nan       | nan          | nan         | nan          | nan          | nan        | nan        | nan              | nan              | nan              | nan              | nan              | nan              |
| Continued on next page |          |              |              |              |              |          |          |              |           |              |             |              |              |            |            |                  |                  |                  |                  |                  |                  |

| Subject                | Metric   | DeepConvNet | EEGNet | Conformer | CTNet | BIOT (f) | BIOT (l) | BENDR (f) | BENDR (l) | CBraMod (f) | CBraMod (l) | EEGPT (f) | EEGPT (l) | LaBraM (f) | LaBraM (l) | STEGformer-s (f) | STEGformer-s (l) | STEGformer-b (f) | STEGformer-b (l) | STEGformer-l (f) | STEGformer-l (l) |
|------------------------|----------|-------------|--------|-----------|-------|----------|----------|-----------|-----------|-------------|-------------|-----------|-----------|------------|------------|------------------|------------------|------------------|------------------|------------------|------------------|
|                        | Acc.1    | 0.449       | 0.454  | 0.296     | 0.454 | 0.592    | 0.425    | 0.634     | 0.454     | 0.394       | 0.546       | 0.563     | 0.568     | 0.744      | 0.594      | 0.706            | 0.706            | 0.509            | 0.407            | 0.494            | 0.443            |
|                        | Acc.2    | 0.871       | 0.811  | 0.938     | 0.713 | 0.922    | 0.724    | 0.835     | 0.791     | 0.775       | 0.917       | 0.964     | 0.902     | 1.000      | 0.949      | 0.984            | 0.969            | 0.953            | 0.623            | 0.647            | 0.859            |
| Asub-040BAcc           | $\kappa$ | nan         | nan    | nan       | nan   | nan      | nan      | nan       | nan       | nan         | nan         | nan       | nan       | nan        | nan        | nan              | nan              | nan              | nan              | nan              | nan              |
|                        | AUC      | nan         | nan    | nan       | nan   | nan      | nan      | nan       | nan       | nan         | nan         | nan       | nan       | nan        | nan        | nan              | nan              | nan              | nan              | nan              | nan              |
|                        | Acc.1    | 0.896       | 0.885  | 0.844     | 0.927 | 0.781    | 0.375    | 0.844     | 0.479     | 0.729       | 0.823       | 0.875     | 0.927     | 0.885      | 0.198      | 0.781            | 0.927            | 0.719            | 0.854            | 0.958            | 0.948            |
|                        | Acc.2    | 0.969       | 0.969  | 0.979     | 0.938 | 0.979    | 0.719    | 0.917     | 0.865     | 1.000       | 0.958       | 0.990     | 0.979     | 1.000      | 0.708      | 0.990            | 0.958            | 0.927            | 0.938            | 0.990            | 1.000            |
| Asub-041BAcc           | $\kappa$ | nan         | nan    | nan       | nan   | nan      | nan      | nan       | nan       | nan         | nan         | nan       | nan       | nan        | nan        | nan              | nan              | nan              | nan              | nan              | nan              |
|                        | AUC      | nan         | nan    | nan       | nan   | nan      | nan      | nan       | nan       | nan         | nan         | nan       | nan       | nan        | nan        | nan              | nan              | nan              | nan              | nan              | nan              |
|                        | Acc.1    | 1.000       | 0.892  | 0.981     | 0.870 | 1.000    | 0.202    | 0.821     | 0.230     | 0.907       | 0.370       | 0.963     | 1.000     | 1.000      | 0.016      | 1.000            | 0.926            | 1.000            | 0.858            | 1.000            | 0.981            |
|                        | Acc.2    | 1.000       | 1.000  | 1.000     | 1.000 | 1.000    | 0.693    | 0.855     | 0.693     | 1.000       | 0.761       | 1.000     | 1.000     | 1.000      | 0.139      | 1.000            | 1.000            | 1.000            | 1.000            | 1.000            | 1.000            |
| Asub-042BAcc           | $\kappa$ | nan         | nan    | nan       | nan   | nan      | nan      | nan       | nan       | nan         | nan         | nan       | nan       | nan        | nan        | nan              | nan              | nan              | nan              | nan              | nan              |
|                        | AUC      | nan         | nan    | nan       | nan   | nan      | nan      | nan       | nan       | nan         | nan         | nan       | nan       | nan        | nan        | nan              | nan              | nan              | nan              | nan              | nan              |
|                        | Acc.1    | 0.969       | 0.615  | 0.781     | 0.417 | 0.979    | 0.969    | 0.948     | 0.333     | 0.396       | 0.406       | 1.000     | 0.990     | 0.521      | 0.354      | 0.812            | 0.990            | 0.823            | 0.979            | 0.865            | 1.000            |
|                        | Acc.2    | 1.000       | 1.000  | 0.990     | 1.000 | 1.000    | 1.000    | 0.979     | 0.896     | 0.656       | 0.896       | 1.000     | 1.000     | 1.000      | 0.958      | 1.000            | 1.000            | 0.990            | 1.000            | 1.000            | 1.000            |
| Asub-043BAcc           | $\kappa$ | nan         | nan    | nan       | nan   | nan      | nan      | nan       | nan       | nan         | nan         | nan       | nan       | nan        | nan        | nan              | nan              | nan              | nan              | nan              | nan              |
|                        | AUC      | nan         | nan    | nan       | nan   | nan      | nan      | nan       | nan       | nan         | nan         | nan       | nan       | nan        | nan        | nan              | nan              | nan              | nan              | nan              | nan              |
|                        | Acc.1    | 0.401       | 0.641  | 0.250     | 0.323 | 0.000    | 0.000    | 0.427     | 0.130     | 0.052       | 0.276       | 0.542     | 0.198     | 0.130      | 0.094      | 0.000            | 0.328            | 0.000            | 0.328            | 0.583            | 0.922            |
|                        | Acc.2    | 1.000       | 0.922  | 0.802     | 0.661 | 0.776    | 0.094    | 0.672     | 0.599     | 0.240       | 0.661       | 0.969     | 0.984     | 0.339      | 0.812      | 0.068            | 0.865            | 0.062            | 0.547            | 0.943            | 1.000            |
| Asub-044BAcc           | $\kappa$ | nan         | nan    | nan       | nan   | nan      | nan      | nan       | nan       | nan         | nan         | nan       | nan       | nan        | nan        | nan              | nan              | nan              | nan              | nan              | nan              |
|                        | AUC      | nan         | nan    | nan       | nan   | nan      | nan      | nan       | nan       | nan         | nan         | nan       | nan       | nan        | nan        | nan              | nan              | nan              | nan              | nan              | nan              |
|                        | Acc.1    | 0.718       | 0.898  | 0.134     | 0.429 | 0.572    | 0.913    | 0.758     | 0.246     | 0.900       | 0.606       | 0.805     | 0.274     | 0.674      | 0.656      | 0.569            | 0.737            | 0.603            | 0.858            | 0.411            | 0.721            |
|                        | Acc.2    | 0.873       | 1.000  | 0.482     | 0.913 | 0.826    | 0.981    | 0.892     | 0.705     | 0.984       | 0.919       | 1.000     | 0.429     | 0.913      | 0.966      | 0.823            | 1.000            | 0.876            | 0.981            | 0.984            | 1.000            |
| Asub-045BAcc           | $\kappa$ | nan         | nan    | nan       | nan   | nan      | nan      | nan       | nan       | nan         | nan         | nan       | nan       | nan        | nan        | nan              | nan              | nan              | nan              | nan              | nan              |
|                        | AUC      | nan         | nan    | nan       | nan   | nan      | nan      | nan       | nan       | nan         | nan         | nan       | nan       | nan        | nan        | nan              | nan              | nan              | nan              | nan              | nan              |
|                        | Acc.1    | 0.462       | 0.139  | 0.663     | 0.314 | 0.605    | 0.407    | 0.174     | 0.302     | 0.272       | 0.519       | 0.294     | 0.345     | 0.489      | 0.101      | 0.981            | 0.206            | 0.873            | 0.101            | 0.698            | 0.214            |
|                        | Acc.2    | 0.787       | 0.772  | 0.838     | 0.364 | 0.965    | 0.601    | 0.631     | 0.620     | 0.899       | 0.922       | 0.911     | 0.981     | 1.000      | 0.814      | 1.000            | 0.695            | 1.000            | 0.334            | 0.984            | 0.815            |
| Continued on next page |          |             |        |           |       |          |          |           |           |             |             |           |           |            |            |                  |                  |                  |                  |                  |                  |

Continued on next page



| Subject   | Metric   | DeepConvnet  | EEGNet       | Conformer | CTNet        | BIOT (f) | BIOT (l) | BENDR (f)    | BENDR (l) | CBraMod (f) | CBraMod (l)  | EEGPT (f)    | EEGPT (l) | LaBraM (f)   | LaBraM (l)   | STEGformer-s (f) | STEGformer-s (l) | STEGformer-q (f) | STEGformer-q (l) | STEGformer-l (f) | STEGformer-l (l) |
|-----------|----------|--------------|--------------|-----------|--------------|----------|----------|--------------|-----------|-------------|--------------|--------------|-----------|--------------|--------------|------------------|------------------|------------------|------------------|------------------|------------------|
| Asub-046B | $\kappa$ | nan          | nan          | nan       | nan          | nan      | nan      | nan          | nan       | nan         | nan          | nan          | nan       | nan          | nan          | nan              | nan              | nan              | nan              | nan              | nan              |
|           | AUC      | nan          | nan          | nan       | nan          | nan      | nan      | nan          | nan       | nan         | nan          | nan          | nan       | nan          | nan          | nan              | nan              | nan              | nan              | nan              | nan              |
|           | Acc.1    | 0.927        | 0.822        | 0.854     | 0.942        | 0.748    | 0.707    | 0.576        | 0.419     | 0.607       | 0.560        | 0.544        | 0.800     | 0.947        | 0.660        | 0.974            | 0.932            | 0.942            | 0.759            | <b>0.958</b>     | 0.900            |
|           | Acc.2    | 1.000        | 0.911        | 1.000     | 0.958        | 0.974    | 0.932    | 0.759        | 0.796     | 0.885       | 0.743        | 0.879        | 0.905     | 0.974        | 0.905        | 1.000            | 0.974            | 1.000            | 0.916            | <b>0.984</b>     | 0.947            |
| Asub-047B | $\kappa$ | nan          | nan          | nan       | nan          | nan      | nan      | nan          | nan       | nan         | nan          | nan          | nan       | nan          | nan          | nan              | nan              | nan              | nan              | nan              | nan              |
|           | AUC      | nan          | nan          | nan       | nan          | nan      | nan      | nan          | nan       | nan         | nan          | nan          | nan       | nan          | nan          | nan              | nan              | nan              | nan              | nan              | nan              |
|           | Acc.1    | 0.953        | 0.852        | 0.645     | 0.837        | 0.938    | 0.861    | 0.615        | 0.308     | 0.791       | 0.661        | 0.730        | 0.568     | 0.946        | 0.553        | <b>0.977</b>     | 0.946            | 0.969            | 0.800            | 0.984            | 0.969            |
|           | Acc.2    | 0.969        | <b>0.984</b> | 0.923     | <b>0.984</b> | 0.969    | 0.908    | 0.791        | 0.655     | 0.930       | 0.892        | 0.838        | 0.793     | 1.000        | <b>0.984</b> | 0.977            | 1.000            | <b>0.984</b>     | 1.000            | 1.000            | 1.000            |
| Asub-048B | $\kappa$ | nan          | nan          | nan       | nan          | nan      | nan      | nan          | nan       | nan         | nan          | nan          | nan       | nan          | nan          | nan              | nan              | nan              | nan              | nan              | nan              |
|           | AUC      | nan          | nan          | nan       | nan          | nan      | nan      | nan          | nan       | nan         | nan          | nan          | nan       | nan          | nan          | nan              | nan              | nan              | nan              | nan              | nan              |
|           | Acc.1    | <b>0.833</b> | 0.781        | 0.594     | 0.698        | 0.396    | 0.656    | 0.625        | 0.229     | 0.396       | 0.719        | 0.802        | 0.771     | 0.396        | 0.292        | 0.115            | 0.729            | 0.042            | 0.625            | 0.073            | 0.875            |
|           | Acc.2    | 0.875        | 0.854        | 0.885     | 0.844        | 0.812    | 0.792    | 0.865        | 0.729     | 0.750       | 1.000        | 0.896        | 0.896     | <b>0.990</b> | 0.740        | 0.917            | 0.865            | 0.656            | 0.729            | 0.719            | 0.938            |
| Asub-049B | $\kappa$ | nan          | nan          | nan       | nan          | nan      | nan      | nan          | nan       | nan         | nan          | nan          | nan       | nan          | nan          | nan              | nan              | nan              | nan              | nan              | nan              |
|           | AUC      | nan          | nan          | nan       | nan          | nan      | nan      | nan          | nan       | nan         | nan          | nan          | nan       | nan          | nan          | nan              | nan              | nan              | nan              | nan              | nan              |
|           | Acc.1    | 1.000        | <b>0.984</b> | 0.929     | 0.953        | 0.905    | 0.906    | 0.922        | 0.337     | 1.000       | 0.488        | 0.914        | 0.882     | 1.000        | 0.543        | 0.795            | <b>0.984</b>     | 0.818            | <b>0.984</b>     | 0.826            | 0.961            |
|           | Acc.2    | 1.000        | 1.000        | 1.000     | 1.000        | 0.976    | 1.000    | <b>0.984</b> | 0.818     | 1.000       | 0.772        | 1.000        | 0.976     | 1.000        | 0.921        | 1.000            | 1.000            | 1.000            | 1.000            | 1.000            | 1.000            |
| Asub-050B | $\kappa$ | nan          | nan          | nan       | nan          | nan      | nan      | nan          | nan       | nan         | nan          | nan          | nan       | nan          | nan          | nan              | nan              | nan              | nan              | nan              | nan              |
|           | AUC      | nan          | nan          | nan       | nan          | nan      | nan      | nan          | nan       | nan         | nan          | nan          | nan       | nan          | nan          | nan              | nan              | nan              | nan              | nan              | nan              |
|           | Acc.1    | 0.215        | 0.554        | 0.311     | 0.402        | 0.331    | 0.262    | 0.377        | 0.302     | 0.579       | 0.782        | 0.442        | 0.498     | <b>0.601</b> | 0.000        | 0.109            | 0.408            | 0.393            | 0.031            | 0.000            | 0.162            |
|           | Acc.2    | 0.851        | 0.807        | 0.557     | 0.801        | 0.537    | 0.571    | 0.660        | 0.729     | 0.888       | 0.925        | 0.885        | 0.978     | 0.841        | 0.234        | 0.630            | 0.704            | <b>0.963</b>     | 0.243            | 0.424            | 0.470            |
| Asub-051B | $\kappa$ | nan          | nan          | nan       | nan          | nan      | nan      | nan          | nan       | nan         | nan          | nan          | nan       | nan          | nan          | nan              | nan              | nan              | nan              | nan              | nan              |
|           | AUC      | nan          | nan          | nan       | nan          | nan      | nan      | nan          | nan       | nan         | nan          | nan          | nan       | nan          | nan          | nan              | nan              | nan              | nan              | nan              | nan              |
|           | Acc.1    | 0.969        | 0.921        | 0.906     | 0.952        | 0.496    | 0.653    | 0.465        | 0.299     | 0.472       | 0.749        | <b>0.976</b> | 0.952     | <b>0.976</b> | 0.079        | 1.000            | 0.858            | 1.000            | 0.615            | 1.000            | 0.961            |
|           | Acc.2    | 1.000        | 1.000        | 1.000     | 1.000        | 0.945    | 0.897    | 0.732        | 0.763     | 1.000       | <b>0.961</b> | 1.000        | 1.000     | 1.000        | 0.733        | 1.000            | 1.000            | 1.000            | 1.000            | 1.000            | 1.000            |
| Asub-052B | $\kappa$ | nan          | nan          | nan       | nan          | nan      | nan      | nan          | nan       | nan         | nan          | nan          | nan       | nan          | nan          | nan              | nan              | nan              | nan              | nan              | nan              |
|           | AUC      | nan          | nan          | nan       | nan          | nan      | nan      | nan          | nan       | nan         | nan          | nan          | nan       | nan          | nan          | nan              | nan              | nan              | nan              | nan              | nan              |

Continued on next page

| Subject                | Metric   | DeepConvnet  | EEGNet       | Conformer    | CTNet        | BIOT <sup>(f)</sup> | BIOT <sup>(l)</sup> | BENDR <sup>(f)</sup> | BENDR <sup>(l)</sup> | CBranMod <sup>(f)</sup> | CBranMod <sup>(l)</sup> | EEGPT <sup>(f)</sup> | EEGPT <sup>(l)</sup> | LaBranM <sup>(f)</sup> | LaBranM <sup>(l)</sup> | STEGformer-s <sup>(f)</sup> | STEGformer-s <sup>(l)</sup> | STEGformer-b <sup>(f)</sup> | STEGformer-b <sup>(l)</sup> | STEGformer-l <sup>(f)</sup> | STEGformer-l <sup>(l)</sup> |
|------------------------|----------|--------------|--------------|--------------|--------------|---------------------|---------------------|----------------------|----------------------|-------------------------|-------------------------|----------------------|----------------------|------------------------|------------------------|-----------------------------|-----------------------------|-----------------------------|-----------------------------|-----------------------------|-----------------------------|
|                        |          |              |              |              |              |                     |                     |                      |                      |                         |                         |                      |                      |                        |                        |                             |                             |                             |                             |                             |                             |
|                        | Acc.1    | 0.581        | 0.492        | 0.664        | 0.534        | 0.544               | 0.450               | 0.465                | 0.204                | 0.550                   | 0.451                   | 0.649                | 0.481                | 0.827                  | 0.262                  | <b>0.785</b>                | 0.544                       | 0.591                       | 0.465                       | 0.764                       | 0.497                       |
|                        | Acc.2    | 0.869        | 0.633        | 0.780        | 0.696        | 0.837               | 0.607               | 0.706                | 0.655                | 0.812                   | 0.687                   | 0.984                | 0.706                | <b>0.969</b>           | 0.922                  | 0.911                       | 0.738                       | 0.722                       | 0.523                       | 0.927                       | 0.607                       |
| Asub-053BAcc           | $\kappa$ | nan          | nan          | nan          | nan          | nan                 | nan                 | nan                  | nan                  | nan                     | nan                     | nan                  | nan                  | nan                    | nan                    | nan                         | nan                         | nan                         | nan                         | nan                         | nan                         |
|                        | AUC      | nan          | nan          | nan          | nan          | nan                 | nan                 | nan                  | nan                  | nan                     | nan                     | nan                  | nan                  | nan                    | nan                    | nan                         | nan                         | nan                         | nan                         | nan                         | nan                         |
|                        | Acc.1    | 0.768        | 0.330        | 0.401        | 0.676        | 0.815               | 0.746               | 0.655                | 0.408                | 0.776                   | 0.413                   | 0.629                | 0.254                | <b>0.847</b>           | 0.399                  | 0.899                       | 0.418                       | 0.807                       | 0.524                       | 0.822                       | 0.714                       |
|                        | Acc.2    | 0.876        | 0.807        | 0.531        | 0.938        | 0.939               | 0.869               | 0.854                | 0.847                | 0.908                   | 0.690                   | 0.876                | 0.501                | 0.977                  | 0.869                  | 1.000                       | 0.817                       | 0.969                       | 0.777                       | <b>0.984</b>                | 0.916                       |
| Asub-054BAcc           | $\kappa$ | nan          | nan          | nan          | nan          | nan                 | nan                 | nan                  | nan                  | nan                     | nan                     | nan                  | nan                  | nan                    | nan                    | nan                         | nan                         | nan                         | nan                         | nan                         | nan                         |
|                        | AUC      | nan          | nan          | nan          | nan          | nan                 | nan                 | nan                  | nan                  | nan                     | nan                     | nan                  | nan                  | nan                    | nan                    | nan                         | nan                         | nan                         | nan                         | nan                         | nan                         |
|                        | Acc.1    | 1.000        | 1.000        | 0.969        | <b>0.984</b> | 0.969               | 0.776               | 1.000                | 0.370                | <b>0.984</b>            | 0.339                   | 0.792                | 1.000                | 0.964                  | 0.677                  | 0.979                       | 1.000                       | <b>0.984</b>                | 1.000                       | <b>0.984</b>                | 1.000                       |
|                        | Acc.2    | 1.000        | 1.000        | 1.000        | 1.000        | 1.000               | <b>0.984</b>        | 1.000                | 0.849                | 1.000                   | 0.875                   | 1.000                | 1.000                | 1.000                  | 0.969                  | 1.000                       | 1.000                       | 1.000                       | 1.000                       | 1.000                       | 1.000                       |
| Asub-055BAcc           | $\kappa$ | nan          | nan          | nan          | nan          | nan                 | nan                 | nan                  | nan                  | nan                     | nan                     | nan                  | nan                  | nan                    | nan                    | nan                         | nan                         | nan                         | nan                         | nan                         | nan                         |
|                        | AUC      | nan          | nan          | nan          | nan          | nan                 | nan                 | nan                  | nan                  | nan                     | nan                     | nan                  | nan                  | nan                    | nan                    | nan                         | nan                         | nan                         | nan                         | nan                         | nan                         |
|                        | Acc.1    | 1.000        | <b>0.984</b> | 0.953        | <b>0.984</b> | 1.000               | 0.888               | 0.876                | 0.374                | 0.941                   | 0.760                   | 1.000                | 0.978                | 1.000                  | 0.969                  | 1.000                       | 1.000                       | 1.000                       | 1.000                       | 1.000                       | 1.000                       |
|                        | Acc.2    | 1.000        | 1.000        | 1.000        | <b>0.984</b> | 1.000               | 0.963               | 0.963                | 0.819                | 1.000                   | 0.925                   | 1.000                | 0.978                | 1.000                  | <b>0.984</b>           | 1.000                       | 1.000                       | 1.000                       | 1.000                       | 1.000                       | 1.000                       |
| Asub-056BAcc           | $\kappa$ | nan          | nan          | nan          | nan          | nan                 | nan                 | nan                  | nan                  | nan                     | nan                     | nan                  | nan                  | nan                    | nan                    | nan                         | nan                         | nan                         | nan                         | nan                         | nan                         |
|                        | AUC      | nan          | nan          | nan          | nan          | nan                 | nan                 | nan                  | nan                  | nan                     | nan                     | nan                  | nan                  | nan                    | nan                    | nan                         | nan                         | nan                         | nan                         | nan                         | nan                         |
|                        | Acc.1    | 0.391        | 0.286        | 0.000        | 0.317        | 0.661               | 0.593               | 0.391                | 0.441                | 0.302                   | 0.674                   | 0.633                | 0.512                | 0.451                  | 0.748                  | 0.454                       | 0.858                       | 0.199                       | 0.721                       | 0.472                       | <b>0.823</b>                |
|                        | Acc.2    | 0.686        | 0.724        | 0.071        | 0.640        | <b>0.981</b>        | 0.913               | 0.624                | 0.848                | 0.798                   | 0.916                   | 0.879                | 0.708                | 1.000                  | 1.000                  | 0.705                       | 1.000                       | 0.541                       | 0.929                       | 0.832                       | 1.000                       |
| Asub-057BAcc           | $\kappa$ | nan          | nan          | nan          | nan          | nan                 | nan                 | nan                  | nan                  | nan                     | nan                     | nan                  | nan                  | nan                    | nan                    | nan                         | nan                         | nan                         | nan                         | nan                         | nan                         |
|                        | AUC      | nan          | nan          | nan          | nan          | nan                 | nan                 | nan                  | nan                  | nan                     | nan                     | nan                  | nan                  | nan                    | nan                    | nan                         | nan                         | nan                         | nan                         | nan                         | nan                         |
|                        | Acc.1    | 0.740        | 0.733        | <b>0.874</b> | 0.685        | 0.276               | 0.086               | 0.710                | 0.339                | 0.489                   | 0.401                   | 0.756                | 0.654                | 0.921                  | 0.039                  | 0.709                       | 0.433                       | 0.749                       | 0.134                       | 0.551                       | 0.370                       |
|                        | Acc.2    | 0.914        | <b>0.976</b> | 0.945        | <b>0.976</b> | 0.496               | 0.450               | 0.914                | 0.835                | 0.763                   | 0.567                   | 0.945                | 0.945                | 1.000                  | 0.528                  | 0.866                       | 0.819                       | 0.882                       | 0.276                       | 0.961                       | 0.693                       |
| Asub-058BAcc           | $\kappa$ | nan          | nan          | nan          | nan          | nan                 | nan                 | nan                  | nan                  | nan                     | nan                     | nan                  | nan                  | nan                    | nan                    | nan                         | nan                         | nan                         | nan                         | nan                         | nan                         |
|                        | AUC      | nan          | nan          | nan          | nan          | nan                 | nan                 | nan                  | nan                  | nan                     | nan                     | nan                  | nan                  | nan                    | nan                    | nan                         | nan                         | nan                         | nan                         | nan                         | nan                         |
|                        | Acc.1    | 0.618        | 0.512        | 0.775        | 0.706        | 0.685               | 0.706               | 0.398                | 0.440                | 0.450                   | 0.414                   | 0.534                | 0.512                | 0.220                  | 0.482                  | 0.146                       | 0.974                       | <b>0.900</b>                | 0.659                       | 0.701                       | 0.848                       |
|                        | Acc.2    | <b>0.984</b> | 0.843        | 0.958        | 0.947        | 0.974               | 0.859               | 0.701                | 0.796                | 1.000                   | 0.738                   | 0.822                | 0.854                | 0.879                  | 0.927                  | 0.424                       | 1.000                       | 1.000                       | 0.969                       | 0.868                       | 0.958                       |
| Continued on next page |          |              |              |              |              |                     |                     |                      |                      |                         |                         |                      |                      |                        |                        |                             |                             |                             |                             |                             |                             |

372

373

374

375

376

377

378

379

380

381

382

383

384

385

386

387

388

389

390

391

392

393

394

395

396

397

398

399

400

401

402

403

404

| Subject                | Metric   | DeepConvnet  | EEGNet | Conformer | CTNet | BIOT <sup>(j)</sup> | BIOT <sup>(i)</sup> | BENDR <sup>(j)</sup> | BENDR <sup>(i)</sup> | CBraMod <sup>(j)</sup> | CBraMod <sup>(i)</sup> | EEGPT <sup>(j)</sup> | EEGPT <sup>(i)</sup> | LaBraM <sup>(j)</sup> | LaBraM <sup>(i)</sup> | STEGformer-s <sup>(j)</sup> | STEGformer-s <sup>(i)</sup> | STEGformer-b <sup>(j)</sup> | STEGformer-b <sup>(i)</sup> | STEGformer-l <sup>(j)</sup> | STEGformer-l <sup>(i)</sup> |
|------------------------|----------|--------------|--------|-----------|-------|---------------------|---------------------|----------------------|----------------------|------------------------|------------------------|----------------------|----------------------|-----------------------|-----------------------|-----------------------------|-----------------------------|-----------------------------|-----------------------------|-----------------------------|-----------------------------|
| Asub-059BAcc           | $\kappa$ | nan          | nan    | nan       | nan   | nan                 | nan                 | nan                  | nan                  | nan                    | nan                    | nan                  | nan                  | nan                   | nan                   | nan                         | nan                         | nan                         | nan                         | nan                         | nan                         |
|                        | AUC      | nan          | nan    | nan       | nan   | nan                 | nan                 | nan                  | nan                  | nan                    | nan                    | nan                  | nan                  | nan                   | nan                   | nan                         | nan                         | nan                         | nan                         | nan                         | nan                         |
|                        | Acc.1    | 0.732        | 0.338  | 0.094     | 0.244 | 0.629               | 0.196               | 0.315                | 0.307                | 0.000                  | 0.205                  | 0.205                | 0.133                | 0.157                 | 0.126                 | 0.055                       | 0.542                       | 0.173                       | 0.551                       | <b>0.786</b>                | 0.889                       |
| Asub-060BAcc           | $\kappa$ | nan          | nan    | nan       | nan   | nan                 | nan                 | nan                  | nan                  | nan                    | nan                    | nan                  | nan                  | nan                   | nan                   | nan                         | nan                         | nan                         | nan                         | nan                         | nan                         |
|                        | AUC      | nan          | nan    | nan       | nan   | nan                 | nan                 | nan                  | nan                  | nan                    | nan                    | nan                  | nan                  | nan                   | nan                   | nan                         | nan                         | nan                         | nan                         | nan                         | nan                         |
|                        | Acc.1    | <b>0.972</b> | 0.953  | 0.941     | 0.957 | 0.941               | 0.882               | 0.842                | 0.220                | 0.720                  | 0.531                  | 0.929                | 0.910                | <b>0.972</b>          | 0.524                 | 1.000                       | 1.000                       | 1.000                       | 0.913                       | 1.000                       | 1.000                       |
| Asub-061BAcc           | $\kappa$ | nan          | nan    | nan       | nan   | nan                 | nan                 | nan                  | nan                  | nan                    | nan                    | nan                  | nan                  | nan                   | nan                   | nan                         | nan                         | nan                         | nan                         | nan                         | nan                         |
|                        | AUC      | nan          | nan    | nan       | nan   | nan                 | nan                 | nan                  | nan                  | nan                    | nan                    | nan                  | nan                  | nan                   | nan                   | nan                         | nan                         | nan                         | nan                         | nan                         | nan                         |
|                        | Acc.1    | 0.000        | 0.085  | 0.092     | 0.054 | 0.031               | 0.116               | 0.223                | <b>0.347</b>         | 0.159                  | 0.310                  | 0.334                | 0.378                | 0.244                 | 0.000                 | 0.038                       | 0.016                       | 0.054                       | 0.070                       | 0.092                       | 0.124                       |
| Asub-062BAcc           | $\kappa$ | nan          | nan    | nan       | nan   | nan                 | nan                 | nan                  | nan                  | nan                    | nan                    | nan                  | nan                  | nan                   | nan                   | nan                         | nan                         | nan                         | nan                         | nan                         | nan                         |
|                        | AUC      | nan          | nan    | nan       | nan   | nan                 | nan                 | nan                  | nan                  | nan                    | nan                    | nan                  | nan                  | nan                   | nan                   | nan                         | nan                         | nan                         | nan                         | nan                         | nan                         |
|                        | Acc.1    | 0.590        | 0.382  | 0.462     | 0.509 | 0.410               | 0.818               | 0.803                | 0.519                | 0.800                  | 0.801                  | <b>0.836</b>         | 0.519                | 0.538                 | 0.654                 | 0.775                       | 1.000                       | 0.726                       | 1.000                       | 0.631                       | 1.000                       |
| Asub-063BAcc           | $\kappa$ | nan          | nan    | nan       | nan   | nan                 | nan                 | nan                  | nan                  | nan                    | nan                    | nan                  | nan                  | nan                   | nan                   | nan                         | nan                         | nan                         | nan                         | nan                         | nan                         |
|                        | AUC      | nan          | nan    | nan       | nan   | nan                 | nan                 | nan                  | nan                  | nan                    | nan                    | nan                  | nan                  | nan                   | nan                   | nan                         | nan                         | nan                         | nan                         | nan                         | nan                         |
|                        | Acc.1    | 0.145        | 0.237  | 0.199     | 0.176 | 0.530               | 0.061               | 0.260                | 0.162                | 0.435                  | 0.246                  | 0.392                | 0.321                | 0.530                 | 0.045                 | <b>0.791</b>                | 0.293                       | 0.723                       | 0.145                       | 1.000                       | 0.244                       |
| Asub-064BAcc           | $\kappa$ | nan          | nan    | nan       | nan   | nan                 | nan                 | nan                  | nan                  | nan                    | nan                    | nan                  | nan                  | nan                   | nan                   | nan                         | nan                         | nan                         | nan                         | nan                         | nan                         |
|                        | AUC      | nan          | nan    | nan       | nan   | nan                 | nan                 | nan                  | nan                  | nan                    | nan                    | nan                  | nan                  | nan                   | nan                   | nan                         | nan                         | nan                         | nan                         | nan                         | nan                         |
|                        | Acc.1    | <b>0.984</b> | 0.917  | 0.909     | 0.893 | 1.000               | 1.000               | 0.969                | 0.423                | 0.924                  | 0.691                  | 1.000                | 1.000                | 1.000                 | 0.924                 | 1.000                       | 1.000                       | 1.000                       | 1.000                       | 1.000                       | 1.000                       |
| Asub-065BAcc           | $\kappa$ | nan          | nan    | nan       | nan   | nan                 | nan                 | nan                  | nan                  | nan                    | nan                    | nan                  | nan                  | nan                   | nan                   | nan                         | nan                         | nan                         | nan                         | nan                         | nan                         |
|                        | AUC      | nan          | nan    | nan       | nan   | nan                 | nan                 | nan                  | nan                  | nan                    | nan                    | nan                  | nan                  | nan                   | nan                   | nan                         | nan                         | nan                         | nan                         | nan                         | nan                         |
|                        | Acc.2    | 1.000        | 1.000  | 1.000     | 1.000 | 1.000               | 1.000               | 1.000                | 0.851                | 1.000                  | <b>0.909</b>           | 1.000                | 1.000                | 1.000                 | 1.000                 | 1.000                       | 1.000                       | 1.000                       | 1.000                       | 1.000                       | 1.000                       |
| Continued on next page |          |              |        |           |       |                     |                     |                      |                      |                        |                        |                      |                      |                       |                       |                             |                             |                             |                             |                             |                             |

| Subject                | Metric   | DeepConvNet | EEGNet | Conformer | CTNet | BIOT (f) | BIOT (l) | BENDR (f) | BENDR (l) | CBraMod (f) | CBraMod (l) | EEGPT (f) | EEGPT (l) | LaBraM (f) | LaBraM (l) | STEGformer-s (f) | STEGformer-s (l) | STEGformer-b (f) | STEGformer-b (l) | STEGformer-l (f) | STEGformer-l (l) |
|------------------------|----------|-------------|--------|-----------|-------|----------|----------|-----------|-----------|-------------|-------------|-----------|-----------|------------|------------|------------------|------------------|------------------|------------------|------------------|------------------|
|                        | Acc.1    | 0.264       | 0.476  | 0.230     | 0.348 | 0.910    | 0.209    | 0.317     | 0.417     | 0.510       | 0.422       | 0.748     | 0.304     | 0.858      | 0.196      | 0.569            | 0.805            | 0.969            | 0.749            | 0.947            | 0.895            |
|                        | Acc.2    | 1.000       | 0.755  | 0.792     | 0.755 | 1.000    | 0.508    | 0.708     | 0.845     | 0.718       | 0.580       | 0.932     | 0.656     | 1.000      | 0.668      | 0.935            | 0.858            | 1.000            | 0.836            | 0.981            | 0.981            |
| Asub-066BAcc           | $\kappa$ | nan         | nan    | nan       | nan   | nan      | nan      | nan       | nan       | nan         | nan         | nan       | nan       | nan        | nan        | nan              | nan              | nan              | nan              | nan              | nan              |
|                        | AUC      | nan         | nan    | nan       | nan   | nan      | nan      | nan       | nan       | nan         | nan         | nan       | nan       | nan        | nan        | nan              | nan              | nan              | nan              | nan              | nan              |
|                        | nan      | nan         | nan    | nan       | nan   | nan      | nan      | nan       | nan       | nan         | nan         | nan       | nan       | nan        | nan        | nan              | nan              | nan              | nan              | nan              | nan              |
|                        | Acc.1    | 0.366       | 0.241  | 0.713     | 0.031 | 0.178    | 0.356    | 0.109     | 0.147     | 0.000       | 0.016       | 0.031     | 0.031     | 0.031      | 0.000      | 0.250            | 0.000            | 0.391            | 0.000            | 0.328            | 0.016            |
| Acc.2                  | 1.000    | 0.984       | 1.000  | 0.984     | 0.769 | 0.884    | 0.753    | 0.341     | 0.388     | 0.450       | 0.822       | 0.984     | 0.812     | 0.444      | 1.000      | 1.000            | 1.000            | 1.000            | 0.984            | 1.000            |                  |
| Asub-067BAcc           | $\kappa$ | nan         | nan    | nan       | nan   | nan      | nan      | nan       | nan       | nan         | nan         | nan       | nan       | nan        | nan        | nan              | nan              | nan              | nan              | nan              | nan              |
|                        | AUC      | nan         | nan    | nan       | nan   | nan      | nan      | nan       | nan       | nan         | nan         | nan       | nan       | nan        | nan        | nan              | nan              | nan              | nan              | nan              | nan              |
|                        | nan      | nan         | nan    | nan       | nan   | nan      | nan      | nan       | nan       | nan         | nan         | nan       | nan       | nan        | nan        | nan              | nan              | nan              | nan              | nan              | nan              |
|                        | Acc.1    | 0.061       | 1.000  | 0.186     | 0.016 | 0.955    | 0.798    | 0.418     | 0.124     | 0.000       | 0.000       | 0.847     | 0.955     | 0.122      | 0.016      | 0.000            | 1.000            | 0.291            | 0.969            | 0.000            | 0.906            |
| Acc.2                  | 0.876    | 1.000       | 0.878  | 0.984     | 1.000 | 0.922    | 0.862    | 0.553     | 1.000     | 0.510       | 1.000       | 1.000     | 0.616     | 0.710      | 1.000      | 1.000            | 0.876            | 1.000            | 0.984            | 1.000            |                  |
| Asub-068BAcc           | $\kappa$ | nan         | nan    | nan       | nan   | nan      | nan      | nan       | nan       | nan         | nan         | nan       | nan       | nan        | nan        | nan              | nan              | nan              | nan              | nan              | nan              |
|                        | AUC      | nan         | nan    | nan       | nan   | nan      | nan      | nan       | nan       | nan         | nan         | nan       | nan       | nan        | nan        | nan              | nan              | nan              | nan              | nan              | nan              |
|                        | nan      | nan         | nan    | nan       | nan   | nan      | nan      | nan       | nan       | nan         | nan         | nan       | nan       | nan        | nan        | nan              | nan              | nan              | nan              | nan              | nan              |
|                        | Acc.1    | 0.324       | 0.277  | 0.804     | 0.277 | 0.426    | 0.520    | 0.371     | 0.047     | 0.710       | 0.000       | 0.330     | 0.237     | 0.087      | 0.000      | 0.261            | 0.000            | 0.190            | 0.190            | 0.355            | 0.016            |
| Acc.2                  | 0.757    | 0.536       | 0.969  | 0.748     | 0.772 | 0.891    | 0.496    | 0.094     | 0.875     | 0.339       | 0.766       | 0.844     | 0.364     | 0.016      | 0.850      | 0.694            | 0.694            | 0.504            | 0.891            | 0.458            |                  |
| Asub-069BAcc           | $\kappa$ | nan         | nan    | nan       | nan   | nan      | nan      | nan       | nan       | nan         | nan         | nan       | nan       | nan        | nan        | nan              | nan              | nan              | nan              | nan              | nan              |
|                        | AUC      | nan         | nan    | nan       | nan   | nan      | nan      | nan       | nan       | nan         | nan         | nan       | nan       | nan        | nan        | nan              | nan              | nan              | nan              | nan              | nan              |
|                        | nan      | nan         | nan    | nan       | nan   | nan      | nan      | nan       | nan       | nan         | nan         | nan       | nan       | nan        | nan        | nan              | nan              | nan              | nan              | nan              | nan              |
|                        | Acc.1    | 0.446       | 0.723  | 0.831     | 0.678 | 0.246    | 0.107    | 0.047     | 0.016     | 0.016       | 0.000       | 0.000     | 0.413     | 0.141      | 0.000      | 0.616            | 0.000            | 0.016            | 0.000            | 0.892            | 0.000            |
| Acc.2                  | 1.000    | 1.000       | 1.000  | 1.000     | 0.938 | 0.815    | 0.939    | 0.214     | 0.402     | 0.185       | 0.739       | 0.984     | 0.969     | 0.000      | 0.955      | 0.876            | 1.000            | 0.908            | 1.000            | 0.831            |                  |
| Asub-070BAcc           | $\kappa$ | nan         | nan    | nan       | nan   | nan      | nan      | nan       | nan       | nan         | nan         | nan       | nan       | nan        | nan        | nan              | nan              | nan              | nan              | nan              | nan              |
|                        | AUC      | nan         | nan    | nan       | nan   | nan      | nan      | nan       | nan       | nan         | nan         | nan       | nan       | nan        | nan        | nan              | nan              | nan              | nan              | nan              | nan              |
|                        | nan      | nan         | nan    | nan       | nan   | nan      | nan      | nan       | nan       | nan         | nan         | nan       | nan       | nan        | nan        | nan              | nan              | nan              | nan              | nan              | nan              |
|                        | Acc.1    | 0.750       | 1.000  | 1.000     | 0.469 | 0.375    | 0.500    | 0.469     | 0.000     | 0.625       | 0.375       | 0.156     | 0.688     | 0.969      | 0.000      | 1.000            | 0.125            | 0.969            | 0.500            | 0.969            | 0.781            |
| Acc.2                  | 1.000    | 1.000       | 1.000  | 1.000     | 0.625 | 0.844    | 0.812    | 0.344     | 0.969     | 0.625       | 0.844       | 0.906     | 1.000     | 0.406      | 1.000      | 0.625            | 1.000            | 0.875            | 1.000            | 1.000            |                  |
| Asub-071BAcc           | $\kappa$ | nan         | nan    | nan       | nan   | nan      | nan      | nan       | nan       | nan         | nan         | nan       | nan       | nan        | nan        | nan              | nan              | nan              | nan              | nan              | nan              |
|                        | AUC      | nan         | nan    | nan       | nan   | nan      | nan      | nan       | nan       | nan         | nan         | nan       | nan       | nan        | nan        | nan              | nan              | nan              | nan              | nan              | nan              |
|                        | nan      | nan         | nan    | nan       | nan   | nan      | nan      | nan       | nan       | nan         | nan         | nan       | nan       | nan        | nan        | nan              | nan              | nan              | nan              | nan              | nan              |
|                        | Acc.1    | 0.791       | 0.225  | 0.756     | 0.188 | 0.237    | 0.141    | 0.328     | 0.097     | 0.144       | 0.081       | 0.212     | 0.572     | 0.066      | 0.000      | 0.325            | 0.050            | 0.284            | 0.156            | 0.047            | 0.188            |
| Acc.2                  | 0.950    | 0.825       | 0.984  | 0.822     | 0.528 | 0.613    | 0.669    | 0.322     | 0.738     | 0.512       | 0.684       | 0.844     | 0.722     | 0.562      | 0.953      | 0.434            | 0.487            | 0.891            | 0.919            | 0.478            |                  |
| Continued on next page |          |             |        |           |       |          |          |           |           |             |             |           |           |            |            |                  |                  |                  |                  |                  |                  |

Continued on next page

| Subject      | Metric   | DeepConvnet | EEGNet | Conformer | CTNet | BIOT (f) | BIOT (l) | BENDR (f) | BENDR (l) | CBraMod (f) | CBraMod (l) | EEGPT (f) | EEGPT (l) | LaBraM (f) | LaBraM (l) | STEGformer-s (f) | STEGformer-s (l) | STEGformer-b (f) | STEGformer-b (l) | STEGformer-l (f) | STEGformer-l (l) |
|--------------|----------|-------------|--------|-----------|-------|----------|----------|-----------|-----------|-------------|-------------|-----------|-----------|------------|------------|------------------|------------------|------------------|------------------|------------------|------------------|
|              |          |             |        |           |       |          |          |           |           |             |             |           |           |            |            |                  |                  |                  |                  |                  |                  |
| Asub-072BAcc | $\kappa$ | nan         | nan    | nan       | nan   | nan      | nan      | nan       | nan       | nan         | nan         | nan       | nan       | nan        | nan        | nan              | nan              | nan              | nan              | nan              | nan              |
|              | AUC      | nan         | nan    | nan       | nan   | nan      | nan      | nan       | nan       | nan         | nan         | nan       | nan       | nan        | nan        | nan              | nan              | nan              | nan              | nan              | nan              |
|              | Acc.1    | 0.089       | 0.016  | 0.016     | 0.031 | 0.000    | 0.016    | 0.031     | 0.016     | 0.083       | 0.000       | 0.000     | 0.016     | 0.323      | 0.000      | 0.042            | 0.000            | 0.000            | 0.042            | 0.000            | 0.000            |
|              | Acc.2    | 1.000       | 1.000  | 0.885     | 0.969 | 0.854    | 0.911    | 0.750     | 0.427     | 0.599       | 0.349       | 0.943     | 1.000     | 0.865      | 0.219      | 0.969            | 0.688            | 1.000            | 0.984            | 0.984            | 0.953            |
| Asub-073BAcc | $\kappa$ | nan         | nan    | nan       | nan   | nan      | nan      | nan       | nan       | nan         | nan         | nan       | nan       | nan        | nan        | nan              | nan              | nan              | nan              | nan              | nan              |
|              | AUC      | nan         | nan    | nan       | nan   | nan      | nan      | nan       | nan       | nan         | nan         | nan       | nan       | nan        | nan        | nan              | nan              | nan              | nan              | nan              | nan              |
|              | Acc.1    | 0.831       | 0.516  | 0.764     | 0.630 | 0.897    | 0.648    | 0.516     | 0.051     | 0.917       | 0.396       | 0.407     | 0.851     | 0.969      | 0.000      | 0.953            | 0.000            | 0.984            | 0.289            | 1.000            | 0.051            |
|              | Acc.2    | 1.000       | 0.893  | 0.913     | 0.913 | 0.964    | 0.984    | 0.846     | 0.341     | 0.984       | 0.626       | 0.842     | 1.000     | 1.000      | 0.234      | 1.000            | 0.142            | 1.000            | 0.862            | 1.000            | 0.352            |
| Asub-074BAcc | $\kappa$ | nan         | nan    | nan       | nan   | nan      | nan      | nan       | nan       | nan         | nan         | nan       | nan       | nan        | nan        | nan              | nan              | nan              | nan              | nan              | nan              |
|              | AUC      | nan         | nan    | nan       | nan   | nan      | nan      | nan       | nan       | nan         | nan         | nan       | nan       | nan        | nan        | nan              | nan              | nan              | nan              | nan              | nan              |
|              | Acc.1    | 0.979       | 0.583  | 0.829     | 0.269 | 0.825    | 0.358    | 0.694     | 0.083     | 0.958       | 0.135       | 0.544     | 0.248     | 1.000      | 0.000      | 1.000            | 0.000            | 1.000            | 0.073            | 1.000            | 0.000            |
|              | Acc.2    | 1.000       | 0.906  | 0.990     | 0.642 | 0.990    | 0.777    | 0.969     | 0.373     | 0.979       | 0.512       | 0.892     | 0.906     | 1.000      | 0.248      | 1.000            | 0.000            | 1.000            | 0.348            | 1.000            | 0.031            |
| Asub-075BAcc | $\kappa$ | nan         | nan    | nan       | nan   | nan      | nan      | nan       | nan       | nan         | nan         | nan       | nan       | nan        | nan        | nan              | nan              | nan              | nan              | nan              | nan              |
|              | AUC      | nan         | nan    | nan       | nan   | nan      | nan      | nan       | nan       | nan         | nan         | nan       | nan       | nan        | nan        | nan              | nan              | nan              | nan              | nan              | nan              |
|              | Acc.1    | 0.823       | 0.736  | 0.634     | 0.583 | 0.792    | 0.495    | 0.292     | 0.031     | 0.158       | 0.016       | 0.347     | 0.667     | 0.556      | 0.028      | 0.516            | 0.043            | 0.186            | 0.474            | 0.205            | 0.611            |
|              | Acc.2    | 1.000       | 0.953  | 0.969     | 0.913 | 0.969    | 0.814    | 0.556     | 0.259     | 0.637       | 0.347       | 0.835     | 0.969     | 0.832      | 0.323      | 0.708            | 0.816            | 0.444            | 0.957            | 0.484            | 0.925            |
| Asub-076BAcc | $\kappa$ | nan         | nan    | nan       | nan   | nan      | nan      | nan       | nan       | nan         | nan         | nan       | nan       | nan        | nan        | nan              | nan              | nan              | nan              | nan              | nan              |
|              | AUC      | nan         | nan    | nan       | nan   | nan      | nan      | nan       | nan       | nan         | nan         | nan       | nan       | nan        | nan        | nan              | nan              | nan              | nan              | nan              | nan              |
|              | Acc.1    | 0.000       | 0.000  | 0.000     | 0.000 | 0.000    | 0.000    | 0.218     | 0.134     | 0.000       | 0.031       | 0.000     | 0.000     | 0.000      | 0.000      | 0.000            | 0.000            | 0.000            | 0.000            | 0.000            | 0.000            |
|              | Acc.2    | 0.000       | 0.000  | 0.000     | 0.016 | 0.162    | 0.037    | 0.542     | 0.374     | 0.000       | 0.287       | 0.134     | 0.000     | 0.000      | 0.000      | 0.000            | 0.000            | 0.000            | 0.000            | 0.000            | 0.000            |
| Asub-077BAcc | $\kappa$ | nan         | nan    | nan       | nan   | nan      | nan      | nan       | nan       | nan         | nan         | nan       | nan       | nan        | nan        | nan              | nan              | nan              | nan              | nan              | nan              |
|              | AUC      | nan         | nan    | nan       | nan   | nan      | nan      | nan       | nan       | nan         | nan         | nan       | nan       | nan        | nan        | nan              | nan              | nan              | nan              | nan              | nan              |
|              | Acc.1    | 0.033       | 0.231  | 0.049     | 0.067 | 0.211    | 0.192    | 0.390     | 0.065     | 0.000       | 0.345       | 0.311     | 0.143     | 0.062      | 0.049      | 0.824            | 0.532            | 0.775            | 0.501            | 0.851            | 0.033            |
|              | Acc.2    | 0.098       | 0.554  | 0.129     | 0.082 | 0.583    | 0.546    | 0.693     | 0.321     | 0.109       | 0.632       | 0.468     | 0.450     | 0.454      | 0.793      | 0.920            | 0.953            | 0.953            | 0.953            | 1.000            | 0.474            |
| Asub-078BAcc | $\kappa$ | nan         | nan    | nan       | nan   | nan      | nan      | nan       | nan       | nan         | nan         | nan       | nan       | nan        | nan        | nan              | nan              | nan              | nan              | nan              | nan              |
|              | AUC      | nan         | nan    | nan       | nan   | nan      | nan      | nan       | nan       | nan         | nan         | nan       | nan       | nan        | nan        | nan              | nan              | nan              | nan              | nan              | nan              |
|              | Acc.1    | nan         | nan    | nan       | nan   | nan      | nan      | nan       | nan       | nan         | nan         | nan       | nan       | nan        | nan        | nan              | nan              | nan              | nan              | nan              | nan              |
|              | Acc.2    | nan         | nan    | nan       | nan   | nan      | nan      | nan       | nan       | nan         | nan         | nan       | nan       | nan        | nan        | nan              | nan              | nan              | nan              | nan              | nan              |

Continued on next page

| Subject      | Metric   | DeepConvnet  | EEGNet       | Conformer    | CTNet | BIOT (f) | BIOT (l)     | BENDR (f)    | BENDR (l) | CBraMod (f)  | CBraMod (l)  | EEGPT (f)    | EEGPT (l)    | LaBraM (f) | LaBraM (l) | STEGformer-s (f) | STEGformer-s (l) | STEGformer-b (f) | STEGformer-b (l) | STEGformer-l (f) | STEGformer-l (l) |
|--------------|----------|--------------|--------------|--------------|-------|----------|--------------|--------------|-----------|--------------|--------------|--------------|--------------|------------|------------|------------------|------------------|------------------|------------------|------------------|------------------|
|              |          |              |              |              |       |          |              |              |           |              |              |              |              |            |            |                  |                  |                  |                  |                  |                  |
|              | Acc.1    | 0.034        | 0.515        | 0.019        | 0.229 | 0.111    | 0.879        | 0.323        | 0.065     | 0.034        | 0.425        | 0.279        | 0.543        | 0.258      | 0.000      | 0.276            | <b>0.646</b>     | 0.019            | 0.438            | 0.037            | 0.593            |
|              | Acc.2    | 0.410        | 0.866        | 0.137        | 0.475 | 0.478    | 0.981        | 0.634        | 0.264     | 0.745        | 0.845        | 0.615        | 0.785        | 0.652      | 0.491      | 0.819            | 0.950            | 0.226            | 0.963            | 0.155            | <b>0.969</b>     |
| Asub-079BAcc | $\kappa$ | nan          | nan          | nan          | nan   | nan      | nan          | nan          | nan       | nan          | nan          | nan          | nan          | nan        | nan        | nan              | nan              | nan              | nan              | nan              | nan              |
|              | AUC      | nan          | nan          | nan          | nan   | nan      | nan          | nan          | nan       | nan          | nan          | nan          | nan          | nan        | nan        | nan              | nan              | nan              | nan              | nan              | nan              |
|              | Acc.1    | 0.544        | 0.522        | 0.373        | 0.495 | 0.603    | 0.539        | 0.851        | 0.084     | 0.249        | 0.287        | 1.000        | <b>0.897</b> | 0.124      | 0.037      | 0.320            | 0.713            | 0.174            | 0.763            | 0.292            | 0.507            |
|              | Acc.2    | 0.688        | 0.875        | <b>0.978</b> | 1.000 | 0.844    | 0.785        | 1.000        | 0.237     | 0.654        | 0.882        | 1.000        | 1.000        | 0.510      | 0.825      | 0.673            | <b>0.978</b>     | 0.351            | <b>0.978</b>     | 0.719            | 0.947            |
| Asub-080BAcc | $\kappa$ | nan          | nan          | nan          | nan   | nan      | nan          | nan          | nan       | nan          | nan          | nan          | nan          | nan        | nan        | nan              | nan              | nan              | nan              | nan              | nan              |
|              | AUC      | nan          | nan          | nan          | nan   | nan      | nan          | nan          | nan       | nan          | nan          | nan          | nan          | nan        | nan        | nan              | nan              | nan              | nan              | nan              | nan              |
|              | Acc.1    | 0.000        | <b>0.033</b> | 0.000        | 0.000 | 0.000    | 0.016        | 0.048        | 0.048     | 0.000        | 0.000        | 0.000        | 0.000        | 0.000      | 0.016      | 0.000            | 0.000            | 0.000            | 0.000            | 0.000            | 0.000            |
|              | Acc.2    | <b>0.631</b> | 0.470        | 0.241        | 0.114 | 0.475    | 0.790        | 0.454        | 0.226     | 0.016        | 0.129        | 0.259        | 0.049        | 0.032      | 0.065      | 0.442            | 0.000            | 0.017            | 0.397            | 0.147            | 0.017            |
| Asub-081BAcc | $\kappa$ | nan          | nan          | nan          | nan   | nan      | nan          | nan          | nan       | nan          | nan          | nan          | nan          | nan        | nan        | nan              | nan              | nan              | nan              | nan              | nan              |
|              | AUC      | nan          | nan          | nan          | nan   | nan      | nan          | nan          | nan       | nan          | nan          | nan          | nan          | nan        | nan        | nan              | nan              | nan              | nan              | nan              | nan              |
|              | Acc.1    | 0.021        | 0.203        | 0.078        | 0.224 | 0.000    | 0.047        | 0.250        | 0.083     | 0.000        | <b>0.312</b> | 0.125        | 0.354        | 0.068      | 0.000      | 0.021            | 0.000            | 0.000            | 0.021            | 0.000            | 0.000            |
|              | Acc.2    | 0.240        | 0.870        | 0.958        | 0.635 | 0.490    | <b>0.979</b> | 0.906        | 0.318     | 0.708        | 0.703        | 0.807        | 1.000        | 0.875      | 0.016      | 0.880            | 0.135            | 0.833            | 0.917            | 0.349            | 0.203            |
| Asub-082BAcc | $\kappa$ | nan          | nan          | nan          | nan   | nan      | nan          | nan          | nan       | nan          | nan          | nan          | nan          | nan        | nan        | nan              | nan              | nan              | nan              | nan              | nan              |
|              | AUC      | nan          | nan          | nan          | nan   | nan      | nan          | nan          | nan       | nan          | nan          | nan          | nan          | nan        | nan        | nan              | nan              | nan              | nan              | nan              | nan              |
|              | Acc.1    | 0.203        | 0.106        | 0.169        | 0.081 | 0.366    | 0.431        | 0.388        | 0.138     | 0.106        | 0.066        | 0.000        | 0.081        | 0.116      | 0.025      | <b>0.428</b>     | 0.050            | 0.369            | 0.263            | 0.281            | 0.175            |
|              | Acc.2    | 0.716        | 0.512        | 0.494        | 0.334 | 0.744    | <b>0.897</b> | 0.725        | 0.403     | 0.806        | 0.409        | 0.128        | 0.466        | 0.294      | 0.588      | 0.769            | 0.556            | 0.738            | 0.938            | 0.613            | 0.756            |
| Asub-083BAcc | $\kappa$ | nan          | nan          | nan          | nan   | nan      | nan          | nan          | nan       | nan          | nan          | nan          | nan          | nan        | nan        | nan              | nan              | nan              | nan              | nan              | nan              |
|              | AUC      | nan          | nan          | nan          | nan   | nan      | nan          | nan          | nan       | nan          | nan          | nan          | nan          | nan        | nan        | nan              | nan              | nan              | nan              | nan              | nan              |
|              | Acc.1    | 0.000        | 0.294        | 0.031        | 0.047 | 0.017    | 0.016        | <b>0.466</b> | 0.050     | 0.080        | 0.371        | 0.427        | 0.388        | 0.457      | 0.000      | 0.000            | 0.230            | 0.000            | 0.064            | 0.000            | 0.496            |
|              | Acc.2    | 0.048        | 0.886        | 0.372        | 0.872 | 0.661    | 0.839        | 0.781        | 0.344     | <b>0.938</b> | 0.765        | 0.915        | 0.950        | 0.934      | 0.629      | 0.419            | 0.747            | 0.808            | 0.809            | 0.649            | 0.920            |
| Asub-084BAcc | $\kappa$ | nan          | nan          | nan          | nan   | nan      | nan          | nan          | nan       | nan          | nan          | nan          | nan          | nan        | nan        | nan              | nan              | nan              | nan              | nan              | nan              |
|              | AUC      | nan          | nan          | nan          | nan   | nan      | nan          | nan          | nan       | nan          | nan          | nan          | nan          | nan        | nan        | nan              | nan              | nan              | nan              | nan              | nan              |
|              | Acc.1    | 0.188        | 0.000        | 0.016        | 0.000 | 0.016    | 0.146        | 0.047        | 0.062     | <b>0.167</b> | 0.031        | 0.031        | 0.016        | 0.000      | 0.000      | 0.016            | 0.000            | 0.057            | 0.000            | 0.000            | 0.000            |
|              | Acc.2    | 1.000        | 1.000        | 0.521        | 1.000 | 0.734    | <b>0.969</b> | 0.812        | 0.438     | 0.927        | 0.385        | <b>0.969</b> | 1.000        | 1.000      | 0.391      | 0.844            | 1.000            | 0.870            | 1.000            | 1.000            | 1.000            |

Continued on next page

| Subject   | Metric   | DeepConvnet | EEGNet       | Conformer    | CTNet | BIOT (f) | BIOT (l) | BENDR (f) | BENDR (l) | CBraMod (f)  | CBraMod (l) | EEGPT (f) | EEGPT (l) | LaBraM (f) | LaBraM (l) | STEGformer-s (j) | STEGformer-s (l) | STEGformer-b (j) | STEGformer-b (l) | STEGformer-l (j) | STEGformer-l (l) |
|-----------|----------|-------------|--------------|--------------|-------|----------|----------|-----------|-----------|--------------|-------------|-----------|-----------|------------|------------|------------------|------------------|------------------|------------------|------------------|------------------|
| Asub-085B | $\kappa$ | nan         | nan          | nan          | nan   | nan      | nan      | nan       | nan       | nan          | nan         | nan       | nan       | nan        | nan        | nan              | nan              | nan              | nan              | nan              | nan              |
|           | AUC      | nan         | nan          | nan          | nan   | nan      | nan      | nan       | nan       | nan          | nan         | nan       | nan       | nan        | nan        | nan              | nan              | nan              | nan              | nan              | nan              |
|           | Acc      | nan         | nan          | nan          | nan   | nan      | nan      | nan       | nan       | nan          | nan         | nan       | nan       | nan        | nan        | nan              | nan              | nan              | nan              | nan              | nan              |
|           | Acc.1    | 0.479       | 0.016        | <b>0.333</b> | 0.000 | 0.000    | 0.016    | 0.031     | 0.109     | 0.000        | 0.031       | 0.016     | 0.016     | 0.130      | 0.016      | 0.016            | 0.000            | 0.000            | 0.000            | 0.000            | 0.000            |
| Asub-086B | $\kappa$ | nan         | nan          | nan          | nan   | nan      | nan      | nan       | nan       | nan          | nan         | nan       | nan       | nan        | nan        | nan              | nan              | nan              | nan              | nan              | nan              |
|           | AUC      | nan         | nan          | nan          | nan   | nan      | nan      | nan       | nan       | nan          | nan         | nan       | nan       | nan        | nan        | nan              | nan              | nan              | nan              | nan              | nan              |
|           | Acc      | nan         | nan          | nan          | nan   | nan      | nan      | nan       | nan       | nan          | nan         | nan       | nan       | nan        | nan        | nan              | nan              | nan              | nan              | nan              | nan              |
|           | Acc.1    | 0.599       | <b>0.307</b> | 0.234        | 0.177 | 0.057    | 0.099    | 0.016     | 0.203     | 0.000        | 0.000       | 0.099     | 0.078     | 0.047      | 0.000      | 0.120            | 0.000            | 0.016            | 0.000            | 0.000            | 0.073            |
| Asub-087B | $\kappa$ | nan         | nan          | nan          | nan   | nan      | nan      | nan       | nan       | nan          | nan         | nan       | nan       | nan        | nan        | nan              | nan              | nan              | nan              | nan              | nan              |
|           | AUC      | nan         | nan          | nan          | nan   | nan      | nan      | nan       | nan       | nan          | nan         | nan       | nan       | nan        | nan        | nan              | nan              | nan              | nan              | nan              | nan              |
|           | Acc      | nan         | nan          | nan          | nan   | nan      | nan      | nan       | nan       | nan          | nan         | nan       | nan       | nan        | nan        | nan              | nan              | nan              | nan              | nan              | nan              |
|           | Acc.1    | 0.000       | 0.087        | 0.616        | 0.047 | 0.016    | 0.220    | 0.000     | 0.047     | 0.031        | 0.071       | 0.000     | 0.174     | 0.260      | 0.000      | 0.361            | 0.000            | 0.196            | 0.000            | <b>0.394</b>     | 0.000            |
| Asub-088B | $\kappa$ | nan         | nan          | nan          | nan   | nan      | nan      | nan       | nan       | nan          | nan         | nan       | nan       | nan        | nan        | nan              | nan              | nan              | nan              | nan              | nan              |
|           | AUC      | nan         | nan          | nan          | nan   | nan      | nan      | nan       | nan       | nan          | nan         | nan       | nan       | nan        | nan        | nan              | nan              | nan              | nan              | nan              | nan              |
|           | Acc      | nan         | nan          | nan          | nan   | nan      | nan      | nan       | nan       | nan          | nan         | nan       | nan       | nan        | nan        | nan              | nan              | nan              | nan              | nan              | nan              |
|           | Acc.1    | 0.339       | <b>0.536</b> | 0.134        | 0.166 | 0.481    | 0.544    | 0.134     | 0.048     | 0.386        | 0.464       | 0.031     | 0.086     | 0.393      | 0.016      | 0.314            | 0.016            | 0.141            | 0.031            | 0.503            | 0.016            |
| Asub-089B | $\kappa$ | nan         | nan          | nan          | nan   | nan      | nan      | nan       | nan       | nan          | nan         | nan       | nan       | nan        | nan        | nan              | nan              | nan              | nan              | nan              | nan              |
|           | AUC      | nan         | nan          | nan          | nan   | nan      | nan      | nan       | nan       | nan          | nan         | nan       | nan       | nan        | nan        | nan              | nan              | nan              | nan              | nan              | nan              |
|           | Acc      | nan         | nan          | nan          | nan   | nan      | nan      | nan       | nan       | nan          | nan         | nan       | nan       | nan        | nan        | nan              | nan              | nan              | nan              | nan              | nan              |
|           | Acc.1    | 0.890       | 0.866        | 0.567        | 0.551 | 0.866    | 0.749    | 0.519     | 0.324     | <b>0.867</b> | 0.812       | 0.259     | 0.749     | 0.614      | 0.055      | 0.558            | 0.173            | 0.591            | 0.354            | 0.803            | 0.141            |

## B BCI-IV2A: 4-CLASS MOTOR IMAGERY CLASSIFICATION

### B.1 POPULATION-LEVEL RESULTS

Table 3: Average Performance Metrics Across All Subjects of Population-Trained Models

| Model (Training strategy) | $\kappa$     | AUC          | BAcc         | Acc.1        | Acc.2        |
|---------------------------|--------------|--------------|--------------|--------------|--------------|
|                           | 0.604        | 0.905        | 0.703        | 0.703        | 0.895        |
| <b>DeepConvnet</b>        | $\pm 0.118$  | $\pm 0.053$  | $\pm 0.089$  | $\pm 0.089$  | $\pm 0.059$  |
|                           | 0.604        | 0.910        | 0.703        | 0.703        | 0.893        |
| <b>EEGNet</b>             | $\pm 0.103$  | $\pm 0.045$  | $\pm 0.077$  | $\pm 0.077$  | $\pm 0.045$  |
|                           | 0.414        | 0.805        | 0.561        | 0.561        | 0.785        |
| <b>Conformer</b>          | $\pm 0.104$  | $\pm 0.058$  | $\pm 0.078$  | $\pm 0.078$  | $\pm 0.041$  |
|                           | 0.663        | 0.930        | 0.747        | 0.747        | 0.907        |
| <b>CTNet</b>              | $\pm 0.146$  | $\pm 0.047$  | $\pm 0.109$  | $\pm 0.109$  | $\pm 0.066$  |
|                           | 0.255        | 0.687        | 0.441        | 0.441        | 0.694        |
| <b>BIOT (f)</b>           | $\pm 0.128$  | $\pm 0.085$  | $\pm 0.096$  | $\pm 0.096$  | $\pm 0.090$  |
|                           | 0.240        | 0.692        | 0.430        | 0.430        | 0.689        |
| <b>BIOT (l)</b>           | $\pm 0.171$  | $\pm 0.116$  | $\pm 0.128$  | $\pm 0.128$  | $\pm 0.118$  |
|                           | 0.287        | 0.725        | 0.465        | 0.465        | 0.726        |
| <b>BENDR (f)</b>          | $\pm 0.076$  | $\pm 0.053$  | $\pm 0.057$  | $\pm 0.057$  | $\pm 0.050$  |
|                           | 0.095        | 0.573        | 0.321        | 0.321        | 0.573        |
| <b>BENDR (l)</b>          | $\pm 0.035$  | $\pm 0.019$  | $\pm 0.026$  | $\pm 0.026$  | $\pm 0.020$  |
|                           | 0.490        | 0.851        | 0.617        | 0.618        | 0.840        |
| <b>CBraMod (f)</b>        | $\pm 0.102$  | $\pm 0.051$  | $\pm 0.077$  | $\pm 0.077$  | $\pm 0.053$  |
|                           | 0.092        | 0.634        | 0.319        | 0.319        | 0.616        |
| <b>CBraMod (l)</b>        | $\pm 0.044$  | $\pm 0.049$  | $\pm 0.033$  | $\pm 0.033$  | $\pm 0.028$  |
|                           | 0.203        | 0.674        | 0.402        | 0.402        | 0.670        |
| <b>EEGPT (f)</b>          | $\pm 0.061$  | $\pm 0.042$  | $\pm 0.046$  | $\pm 0.046$  | $\pm 0.039$  |
|                           | 0.475        | 0.841        | 0.606        | 0.606        | 0.821        |
| <b>EEGPT (l)</b>          | $\pm 0.104$  | $\pm 0.054$  | $\pm 0.078$  | $\pm 0.078$  | $\pm 0.055$  |
|                           | 0.226        | 0.677        | 0.419        | 0.419        | 0.701        |
| <b>LaBraM (f)</b>         | $\pm 0.085$  | $\pm 0.050$  | $\pm 0.064$  | $\pm 0.064$  | $\pm 0.050$  |
|                           | 0.048        | 0.572        | 0.286        | 0.286        | 0.562        |
| <b>LaBraM (l)</b>         | $\pm 0.056$  | $\pm 0.056$  | $\pm 0.042$  | $\pm 0.041$  | $\pm 0.051$  |
|                           | 0.586        | 0.863        | 0.689        | 0.689        | 0.876        |
| <b>STEEGformer-s (f)</b>  | $\pm 0.154$  | $\pm 0.069$  | $\pm 0.116$  | $\pm 0.116$  | $\pm 0.082$  |
|                           | 0.162        | 0.690        | 0.371        | 0.371        | 0.636        |
| <b>STEEGformer-s (l)</b>  | $\pm 0.108$  | $\pm 0.098$  | $\pm 0.081$  | $\pm 0.081$  | $\pm 0.094$  |
|                           | <b>0.700</b> | 0.908        | <b>0.775</b> | <b>0.775</b> | <b>0.921</b> |
| <b>STEEGformer-b (f)</b>  | $\pm 0.131$  | $\pm 0.058$  | $\pm 0.098$  | $\pm 0.098$  | $\pm 0.054$  |
|                           | 0.215        | 0.713        | 0.411        | 0.412        | 0.688        |
| <b>STEEGformer-b (l)</b>  | $\pm 0.128$  | $\pm 0.092$  | $\pm 0.096$  | $\pm 0.096$  | $\pm 0.107$  |
|                           | 0.728        | <b>0.928</b> | 0.796        | 0.796        | 0.928        |
| <b>STEEGformer-l (f)</b>  | $\pm 0.147$  | $\pm 0.052$  | $\pm 0.110$  | $\pm 0.110$  | $\pm 0.059$  |
|                           | 0.188        | 0.716        | 0.391        | 0.390        | 0.675        |
| <b>STEEGformer-l (l)</b>  | $\pm 0.146$  | $\pm 0.103$  | $\pm 0.109$  | $\pm 0.110$  | $\pm 0.115$  |



Table 4: Per-Subject Performance Metrics of Population-Trained Models

| Subject | Metric   | DeepConvNet | EEGNet | Conformer | CTNet        | BIOT (f) | BIOT (l) | BENDR (f) | BENDR (l) | CBraMod (f) | CBraMod (l) | EEGPT (f) | EEGPT (l) | LaBraM (f) | LaBraM (l) | STEEGformer-s (f) | STEEGformer-s (l) | STEEGformer-b (f) | STEEGformer-b (l) | STEEGformer-l (f) | STEEGformer-l (l) |
|---------|----------|-------------|--------|-----------|--------------|----------|----------|-----------|-----------|-------------|-------------|-----------|-----------|------------|------------|-------------------|-------------------|-------------------|-------------------|-------------------|-------------------|
| A1      | $\kappa$ | 0.634       | 0.653  | 0.269     | 0.713        | 0.315    | 0.426    | 0.287     | 0.093     | 0.417       | 0.046       | 0.190     | 0.588     | 0.264      | 0.009      | 0.708             | 0.301             | <b>0.759</b>      | 0.338             | 0.782             | 0.389             |
|         | AUC      | 0.922       | 0.931  | 0.720     | <b>0.950</b> | 0.749    | 0.852    | 0.709     | 0.601     | 0.808       | 0.639       | 0.664     | 0.897     | 0.698      | 0.591      | 0.910             | 0.821             | 0.947             | 0.829             | 0.967             | 0.856             |
|         | BAcc     | 0.726       | 0.740  | 0.451     | 0.785        | 0.486    | 0.569    | 0.465     | 0.319     | 0.562       | 0.285       | 0.392     | 0.691     | 0.448      | 0.257      | 0.781             | 0.476             | <b>0.819</b>      | 0.503             | 0.837             | 0.542             |
|         | Acc.1    | 0.726       | 0.740  | 0.451     | 0.785        | 0.486    | 0.569    | 0.465     | 0.319     | 0.562       | 0.285       | 0.392     | 0.691     | 0.448      | 0.264      | 0.781             | 0.476             | <b>0.819</b>      | 0.503             | 0.837             | 0.542             |
|         | Acc.2    | 0.938       | 0.910  | 0.736     | <b>0.962</b> | 0.795    | 0.885    | 0.705     | 0.601     | 0.802       | 0.580       | 0.639     | 0.868     | 0.750      | 0.615      | 0.948             | 0.809             | 0.951             | 0.885             | 0.979             | 0.903             |
| A2      | $\kappa$ | 0.338       | 0.468  | 0.301     | 0.389        | 0.106    | 0.019    | 0.185     | 0.088     | 0.324       | 0.065       | 0.065     | 0.301     | 0.116      | -0.051     | 0.287             | 0.074             | <b>0.449</b>      | 0.116             | 0.444             | 0.032             |
|         | AUC      | 0.790       | 0.827  | 0.742     | 0.838        | 0.569    | 0.541    | 0.657     | 0.553     | 0.758       | 0.575       | 0.579     | 0.741     | 0.604      | 0.488      | 0.708             | 0.555             | 0.773             | 0.568             | <b>0.827</b>      | 0.550             |
|         | BAcc     | 0.503       | 0.601  | 0.476     | 0.542        | 0.330    | 0.264    | 0.389     | 0.316     | 0.493       | 0.299       | 0.299     | 0.476     | 0.337      | 0.212      | 0.465             | 0.306             | <b>0.587</b>      | 0.337             | 0.583             | 0.274             |
|         | Acc.1    | 0.503       | 0.601  | 0.476     | 0.542        | 0.330    | 0.264    | 0.389     | 0.316     | 0.493       | 0.299       | 0.299     | 0.476     | 0.337      | 0.212      | 0.465             | 0.306             | <b>0.587</b>      | 0.337             | 0.583             | 0.274             |
|         | Acc.2    | 0.764       | 0.819  | 0.750     | 0.760        | 0.562    | 0.580    | 0.660     | 0.566     | 0.740       | 0.597       | 0.590     | 0.753     | 0.622      | 0.486      | 0.670             | 0.531             | 0.799             | 0.562             | <b>0.806</b>      | 0.562             |
| A3      | $\kappa$ | 0.787       | 0.810  | 0.532     | 0.898        | 0.370    | 0.481    | 0.292     | 0.097     | 0.648       | 0.125       | 0.278     | 0.611     | 0.417      | 0.134      | 0.829             | 0.116             | <b>0.921</b>      | 0.194             | 0.944             | 0.116             |
|         | AUC      | 0.983       | 0.983  | 0.877     | 0.994        | 0.778    | 0.835    | 0.753     | 0.583     | 0.915       | 0.633       | 0.724     | 0.916     | 0.791      | 0.629      | 0.963             | 0.770             | 0.984             | 0.786             | <b>0.991</b>      | 0.781             |
|         | BAcc     | 0.840       | 0.858  | 0.649     | 0.924        | 0.528    | 0.611    | 0.469     | 0.323     | 0.736       | 0.344       | 0.458     | 0.708     | 0.562      | 0.351      | 0.872             | 0.337             | <b>0.941</b>      | 0.396             | 0.958             | 0.337             |
|         | Acc.1    | 0.840       | 0.858  | 0.649     | 0.924        | 0.528    | 0.611    | 0.469     | 0.323     | 0.736       | 0.344       | 0.458     | 0.708     | 0.562      | 0.351      | 0.872             | 0.337             | <b>0.941</b>      | 0.396             | 0.958             | 0.337             |
|         | Acc.2    | 0.965       | 0.958  | 0.830     | <b>0.983</b> | 0.753    | 0.830    | 0.757     | 0.587     | 0.910       | 0.635       | 0.726     | 0.903     | 0.792      | 0.635      | 0.965             | 0.608             | 0.993             | 0.701             | 0.993             | 0.594             |
| A4      | $\kappa$ | 0.606       | 0.528  | 0.375     | 0.681        | 0.181    | 0.069    | 0.319     | 0.111     | 0.417       | 0.037       | 0.273     | 0.454     | 0.264      | 0.069      | 0.532             | 0.037             | <b>0.648</b>      | 0.144             | 0.630             | 0.199             |
|         | AUC      | 0.894       | 0.877  | 0.789     | 0.926        | 0.630    | 0.582    | 0.735     | 0.584     | 0.829       | 0.578       | 0.701     | 0.832     | 0.686      | 0.602      | 0.858             | 0.616             | <b>0.909</b>      | 0.676             | 0.886             | 0.708             |
|         | BAcc     | 0.705       | 0.646  | 0.531     | 0.760        | 0.385    | 0.302    | 0.490     | 0.333     | 0.562       | 0.278       | 0.455     | 0.590     | 0.448      | 0.302      | 0.649             | 0.278             | <b>0.736</b>      | 0.358             | 0.722             | 0.399             |
|         | Acc.1    | 0.705       | 0.646  | 0.531     | 0.760        | 0.385    | 0.302    | 0.490     | 0.333     | 0.562       | 0.278       | 0.455     | 0.590     | 0.448      | 0.302      | 0.649             | 0.278             | <b>0.736</b>      | 0.361             | 0.722             | 0.399             |
|         | Acc.2    | 0.910       | 0.865  | 0.764     | <b>0.920</b> | 0.628    | 0.531    | 0.743     | 0.583     | 0.837       | 0.604       | 0.694     | 0.830     | 0.684      | 0.615      | 0.878             | 0.580             | 0.941             | 0.684             | 0.917             | 0.677             |
| A5      | $\kappa$ | 0.620       | 0.606  | 0.556     | 0.565        | 0.065    | 0.074    | 0.407     | 0.079     | 0.602       | 0.083       | 0.204     | 0.366     | 0.153      | 0.046      | 0.421             | 0.060             | <b>0.676</b>      | 0.056             | 0.713             | 0.046             |
|         | AUC      | 0.922       | 0.922  | 0.885     | <b>0.927</b> | 0.588    | 0.568    | 0.824     | 0.544     | 0.923       | 0.663       | 0.684     | 0.786     | 0.643      | 0.509      | 0.850             | 0.586             | 0.897             | 0.614             | 0.945             | 0.612             |
|         | BAcc     | 0.715       | 0.705  | 0.667     | 0.674        | 0.299    | 0.306    | 0.556     | 0.309     | 0.701       | 0.312       | 0.403     | 0.524     | 0.365      | 0.285      | 0.566             | 0.295             | <b>0.757</b>      | 0.292             | 0.785             | 0.285             |
|         | Acc.1    | 0.715       | 0.705  | 0.667     | 0.674        | 0.299    | 0.306    | 0.556     | 0.309     | 0.701       | 0.312       | 0.403     | 0.524     | 0.365      | 0.285      | 0.566             | 0.295             | <b>0.757</b>      | 0.292             | 0.785             | 0.281             |

Continued on next page

| Subject | Metric   | DeepConvnet  | EEGNet       | Conformer | CTNet        | BIOT (f) | BIOT (l) | BENDR (f) | BENDR (l) | CBraMod (f) | CBraMod (l) | EEGPT (f) | EEGPT (l) | LaBraM (f) | LaBraM (l) | STEEGformer-s (f) | STEEGformer-s (l) | STEEGformer-b (f) | STEEGformer-b (l) | STEEGformer-l (f) | STEEGformer-l (l) |
|---------|----------|--------------|--------------|-----------|--------------|----------|----------|-----------|-----------|-------------|-------------|-----------|-----------|------------|------------|-------------------|-------------------|-------------------|-------------------|-------------------|-------------------|
| A6      | Acc_2    | 0.875        | <b>0.913</b> | 0.844     | 0.872        | 0.573    | 0.556    | 0.785     | 0.556     | 0.906       | 0.611       | 0.694     | 0.740     | 0.677      | 0.497      | 0.830             | 0.528             | 0.889             | 0.556             | 0.938             | 0.521             |
|         | $\kappa$ | 0.481        | 0.458        | 0.333     | 0.481        | 0.144    | 0.079    | 0.194     | 0.056     | 0.412       | 0.069       | 0.153     | 0.356     | 0.157      | -0.028     | 0.454             | 0.051             | <b>0.532</b>      | 0.102             | 0.537             | 0.074             |
|         | AUC      | 0.841        | <b>0.854</b> | 0.762     | 0.858        | 0.597    | 0.573    | 0.676     | 0.554     | 0.802       | 0.579       | 0.644     | 0.788     | 0.645      | 0.516      | 0.783             | 0.575             | 0.843             | 0.593             | 0.851             | 0.575             |
|         | BAcc     | 0.611        | 0.594        | 0.500     | 0.611        | 0.358    | 0.309    | 0.396     | 0.292     | 0.559       | 0.302       | 0.365     | 0.517     | 0.368      | 0.229      | 0.590             | 0.288             | <b>0.649</b>      | 0.326             | 0.653             | 0.306             |
|         | Acc_1    | 0.611        | 0.594        | 0.500     | 0.611        | 0.358    | 0.309    | 0.396     | 0.292     | 0.562       | 0.302       | 0.365     | 0.517     | 0.368      | 0.229      | 0.590             | 0.285             | <b>0.649</b>      | 0.326             | 0.653             | 0.306             |
|         | Acc_2    | 0.812        | 0.826        | 0.743     | 0.830        | 0.635    | 0.590    | 0.653     | 0.545     | 0.792       | 0.587       | 0.656     | 0.750     | 0.649      | 0.493      | 0.823             | 0.583             | 0.861             | 0.604             | <b>0.837</b>      | 0.583             |
| A7      | $\kappa$ | 0.657        | 0.685        | 0.579     | 0.796        | 0.236    | 0.176    | 0.412     | 0.097     | 0.639       | 0.093       | 0.199     | 0.486     | 0.296      | 0.046      | 0.676             | 0.185             | <b>0.847</b>      | 0.181             | 0.889             | 0.102             |
|         | AUC      | 0.939        | 0.943        | 0.889     | <b>0.976</b> | 0.671    | 0.673    | 0.800     | 0.587     | 0.908       | 0.734       | 0.689     | 0.857     | 0.722      | 0.570      | 0.905             | 0.737             | 0.966             | 0.764             | 0.984             | 0.791             |
|         | BAcc     | 0.743        | 0.764        | 0.684     | 0.847        | 0.427    | 0.382    | 0.559     | 0.323     | 0.729       | 0.319       | 0.399     | 0.615     | 0.472      | 0.285      | 0.757             | 0.389             | <b>0.885</b>      | 0.385             | 0.917             | 0.326             |
|         | Acc_1    | 0.743        | 0.764        | 0.684     | 0.847        | 0.427    | 0.382    | 0.559     | 0.323     | 0.729       | 0.319       | 0.399     | 0.615     | 0.472      | 0.285      | 0.757             | 0.389             | <b>0.885</b>      | 0.385             | 0.917             | 0.326             |
|         | Acc_2    | 0.927        | 0.917        | 0.840     | 0.962        | 0.681    | 0.670    | 0.819     | 0.587     | 0.906       | 0.684       | 0.684     | 0.823     | 0.747      | 0.580      | 0.913             | 0.587             | <b>0.969</b>      | 0.604             | 0.979             | 0.698             |
|         | $\kappa$ | 0.731        | 0.681        | 0.435     | <b>0.801</b> | 0.417    | 0.412    | 0.278     | 0.185     | 0.486       | 0.111       | 0.190     | 0.616     | 0.148      | 0.111      | 0.671             | 0.292             | 0.727             | 0.296             | 0.810             | 0.227             |
| A8      | AUC      | <b>0.953</b> | 0.952        | 0.816     | 0.972        | 0.788    | 0.803    | 0.717     | 0.595     | 0.858       | 0.622       | 0.654     | 0.902     | 0.632      | 0.574      | 0.892             | 0.763             | 0.924             | 0.774             | 0.948             | 0.768             |
|         | BAcc     | 0.799        | 0.760        | 0.576     | <b>0.851</b> | 0.562    | 0.559    | 0.458     | 0.389     | 0.615       | 0.333       | 0.392     | 0.712     | 0.361      | 0.333      | 0.753             | 0.469             | 0.795             | 0.472             | 0.858             | 0.420             |
|         | Acc_1    | 0.799        | 0.760        | 0.576     | <b>0.851</b> | 0.562    | 0.559    | 0.458     | 0.389     | 0.615       | 0.337       | 0.392     | 0.712     | 0.361      | 0.330      | 0.753             | 0.469             | 0.795             | 0.472             | 0.858             | 0.420             |
|         | Acc_2    | 0.944        | <b>0.955</b> | 0.812     | 0.958        | 0.802    | 0.785    | 0.733     | 0.597     | 0.840       | 0.618       | 0.632     | 0.892     | 0.656      | 0.562      | 0.931             | 0.729             | 0.944             | 0.753             | 0.958             | 0.698             |
|         | $\kappa$ | 0.583        | 0.551        | 0.347     | 0.644        | 0.463    | 0.421    | 0.204     | 0.051     | 0.463       | 0.199       | 0.273     | 0.495     | 0.218      | 0.093      | 0.694             | 0.338             | <b>0.736</b>      | 0.509             | 0.806             | 0.505             |
|         | AUC      | 0.904        | 0.903        | 0.762     | 0.924        | 0.809    | 0.799    | 0.659     | 0.552     | 0.858       | 0.692       | 0.731     | 0.850     | 0.672      | 0.683      | 0.901             | 0.817             | <b>0.930</b>      | 0.827             | 0.946             | 0.836             |
| A9      | BAcc     | 0.688        | 0.663        | 0.510     | 0.733        | 0.597    | 0.566    | 0.403     | 0.288     | 0.597       | 0.399       | 0.455     | 0.622     | 0.413      | 0.319      | 0.771             | 0.503             | <b>0.802</b>      | 0.632             | 0.854             | 0.628             |
|         | Acc_1    | 0.688        | 0.663        | 0.510     | 0.733        | 0.597    | 0.566    | 0.403     | 0.288     | 0.597       | 0.399       | 0.455     | 0.622     | 0.413      | 0.319      | 0.771             | 0.503             | <b>0.802</b>      | 0.632             | 0.854             | 0.628             |
|         | Acc_2    | 0.917        | 0.875        | 0.747     | 0.920        | 0.816    | 0.778    | 0.684     | 0.538     | 0.823       | 0.628       | 0.715     | 0.830     | 0.729      | 0.576      | 0.927             | 0.771             | <b>0.938</b>      | 0.844             | 0.948             | 0.840             |
|         | $\kappa$ | 0.583        | 0.551        | 0.347     | 0.644        | 0.463    | 0.421    | 0.204     | 0.051     | 0.463       | 0.199       | 0.273     | 0.495     | 0.218      | 0.093      | 0.694             | 0.338             | <b>0.736</b>      | 0.509             | 0.806             | 0.505             |

## B.2 PER-SUBJECT RESULTS

## B.2.1 WITHIN-SUBJECT EVALUATION

Table 5: Average ‘‘Self’’ Performance Across All Subjects

| Model (Training strategy) | $\kappa$     | AUC          | BAcc         | Acc.1        | Acc.2        |
|---------------------------|--------------|--------------|--------------|--------------|--------------|
|                           | 0.449        | 0.827        | 0.587        | 0.587        | 0.805        |
| <b>DeepConvnet</b>        | $\pm 0.155$  | $\pm 0.083$  | $\pm 0.116$  | $\pm 0.116$  | $\pm 0.084$  |
|                           | 0.454        | 0.835        | 0.591        | 0.591        | 0.825        |
| <b>EEGNet</b>             | $\pm 0.107$  | $\pm 0.060$  | $\pm 0.080$  | $\pm 0.080$  | $\pm 0.057$  |
|                           | 0.359        | 0.761        | 0.519        | 0.519        | 0.753        |
| <b>Conformer</b>          | $\pm 0.116$  | $\pm 0.064$  | $\pm 0.087$  | $\pm 0.087$  | $\pm 0.065$  |
|                           | <b>0.568</b> | <b>0.885</b> | <b>0.676</b> | <b>0.676</b> | <b>0.884</b> |
| <b>CTNet</b>              | $\pm 0.166$  | $\pm 0.072$  | $\pm 0.125$  | $\pm 0.125$  | $\pm 0.070$  |
|                           | 0.210        | 0.664        | 0.407        | 0.407        | 0.669        |
| <b>BIOT (f)</b>           | $\pm 0.141$  | $\pm 0.111$  | $\pm 0.106$  | $\pm 0.106$  | $\pm 0.127$  |
|                           | 0.203        | 0.665        | 0.402        | 0.402        | 0.659        |
| <b>BIOT (l)</b>           | $\pm 0.143$  | $\pm 0.108$  | $\pm 0.108$  | $\pm 0.108$  | $\pm 0.112$  |
|                           | 0.211        | 0.672        | 0.408        | 0.408        | 0.655        |
| <b>BENDR (f)</b>          | $\pm 0.064$  | $\pm 0.048$  | $\pm 0.048$  | $\pm 0.048$  | $\pm 0.047$  |
|                           | 0.088        | 0.575        | 0.316        | 0.316        | 0.584        |
| <b>BENDR (l)</b>          | $\pm 0.040$  | $\pm 0.030$  | $\pm 0.030$  | $\pm 0.030$  | $\pm 0.031$  |
|                           | 0.311        | 0.734        | 0.483        | 0.483        | 0.729        |
| <b>CBraMod (f)</b>        | $\pm 0.101$  | $\pm 0.061$  | $\pm 0.076$  | $\pm 0.075$  | $\pm 0.055$  |
|                           | 0.112        | 0.609        | 0.334        | 0.334        | 0.609        |
| <b>CBraMod (l)</b>        | $\pm 0.036$  | $\pm 0.038$  | $\pm 0.027$  | $\pm 0.027$  | $\pm 0.022$  |
|                           | 0.155        | 0.625        | 0.367        | 0.367        | 0.624        |
| <b>EEGPT (f)</b>          | $\pm 0.049$  | $\pm 0.045$  | $\pm 0.037$  | $\pm 0.037$  | $\pm 0.045$  |
|                           | 0.172        | 0.648        | 0.379        | 0.379        | 0.650        |
| <b>EEGPT (l)</b>          | $\pm 0.088$  | $\pm 0.068$  | $\pm 0.066$  | $\pm 0.066$  | $\pm 0.070$  |
|                           | 0.145        | 0.614        | 0.359        | 0.359        | 0.623        |
| <b>LaBraM (f)</b>         | $\pm 0.120$  | $\pm 0.081$  | $\pm 0.090$  | $\pm 0.090$  | $\pm 0.077$  |
|                           | 0.084        | 0.576        | 0.313        | 0.312        | 0.576        |
| <b>LaBraM (l)</b>         | $\pm 0.066$  | $\pm 0.058$  | $\pm 0.050$  | $\pm 0.049$  | $\pm 0.051$  |
|                           | 0.520        | 0.845        | 0.640        | 0.640        | 0.849        |
| <b>STEEGformer-s (f)</b>  | $\pm 0.202$  | $\pm 0.096$  | $\pm 0.151$  | $\pm 0.151$  | $\pm 0.087$  |
|                           | 0.229        | 0.722        | 0.422        | 0.421        | 0.698        |
| <b>STEEGformer-s (l)</b>  | $\pm 0.093$  | $\pm 0.085$  | $\pm 0.070$  | $\pm 0.072$  | $\pm 0.111$  |
|                           | 0.527        | 0.846        | 0.645        | 0.645        | 0.847        |
| <b>STEEGformer-b (f)</b>  | $\pm 0.151$  | $\pm 0.079$  | $\pm 0.114$  | $\pm 0.114$  | $\pm 0.070$  |
|                           | 0.240        | 0.722        | 0.430        | 0.430        | 0.704        |
| <b>STEEGformer-b (l)</b>  | $\pm 0.105$  | $\pm 0.081$  | $\pm 0.079$  | $\pm 0.079$  | $\pm 0.107$  |
|                           | 0.621        | 0.888        | 0.716        | 0.716        | 0.889        |
| <b>STEEGformer-l (f)</b>  | $\pm 0.156$  | $\pm 0.077$  | $\pm 0.117$  | $\pm 0.117$  | $\pm 0.084$  |
|                           | 0.238        | 0.736        | 0.428        | 0.428        | 0.704        |
| <b>STEEGformer-l (l)</b>  | $\pm 0.121$  | $\pm 0.077$  | $\pm 0.091$  | $\pm 0.091$  | $\pm 0.108$  |

Table 6: Per-Subject ‘‘Self’’ Performance (trained+tested on same subject)

| SubjectMetric          |          | DeepConvnet | EEGNet       | Conformer | CTNet        | BIOT (f) | BIOT (l) | BENDR (f) | BENDR (l) | CBraMod (f) | CBraMod (l) | EEGPT (f) | EEGPT (l) | LaBraM (f) | LaBraM (l) | STEEGformer-s (f) | STEEGformer-s (l) | STEEGformer-b (f) | STEEGformer-b (l) | STEEGformer-l (f) | STEEGformer-l (l) |
|------------------------|----------|-------------|--------------|-----------|--------------|----------|----------|-----------|-----------|-------------|-------------|-----------|-----------|------------|------------|-------------------|-------------------|-------------------|-------------------|-------------------|-------------------|
| A1                     | $\kappa$ | 0.514       | 0.574        | 0.301     | 0.657        | 0.324    | 0.398    | 0.185     | 0.157     | 0.213       | 0.074       | 0.199     | 0.315     | 0.213      | 0.083      | 0.606             | 0.310             | 0.537             | 0.356             | <b>0.639</b>      | 0.380             |
|                        | AUC      | 0.867       | 0.890        | 0.725     | 0.923        | 0.771    | 0.822    | 0.651     | 0.616     | 0.663       | 0.597       | 0.651     | 0.744     | 0.678      | 0.595      | 0.884             | 0.834             | 0.872             | 0.827             | <b>0.909</b>      | 0.840             |
|                        | BAcc     | 0.635       | 0.681        | 0.476     | 0.743        | 0.493    | 0.549    | 0.389     | 0.368     | 0.410       | 0.306       | 0.399     | 0.486     | 0.410      | 0.312      | 0.705             | 0.483             | 0.653             | 0.517             | <b>0.729</b>      | 0.535             |
|                        | Acc.1    | 0.635       | 0.681        | 0.476     | 0.743        | 0.493    | 0.549    | 0.389     | 0.368     | 0.410       | 0.306       | 0.399     | 0.486     | 0.410      | 0.309      | 0.705             | 0.483             | 0.653             | 0.517             | <b>0.729</b>      | 0.535             |
|                        | Acc.2    | 0.882       | 0.872        | 0.736     | <b>0.944</b> | 0.833    | 0.858    | 0.618     | 0.635     | 0.694       | 0.608       | 0.653     | 0.750     | 0.674      | 0.611      | 0.931             | 0.924             | 0.924             | 0.899             | 0.965             | 0.910             |
| A2                     | $\kappa$ | 0.273       | 0.264        | 0.213     | 0.278        | 0.032    | 0.065    | 0.111     | 0.060     | 0.130       | 0.079       | 0.069     | 0.051     | -0.051     | 0.009      | 0.255             | 0.102             | <b>0.301</b>      | 0.125             | 0.407             | 0.139             |
|                        | AUC      | 0.696       | 0.722        | 0.675     | <b>0.743</b> | 0.519    | 0.541    | 0.591     | 0.558     | 0.629       | 0.553       | 0.537     | 0.538     | 0.488      | 0.488      | 0.705             | 0.612             | 0.713             | 0.622             | 0.796             | 0.655             |
|                        | BAcc     | 0.455       | 0.448        | 0.410     | 0.458        | 0.274    | 0.299    | 0.333     | 0.295     | 0.347       | 0.309       | 0.302     | 0.288     | 0.212      | 0.257      | 0.441             | 0.326             | <b>0.476</b>      | 0.344             | 0.556             | 0.354             |
|                        | Acc.1    | 0.455       | 0.448        | 0.410     | 0.458        | 0.274    | 0.299    | 0.333     | 0.295     | 0.347       | 0.309       | 0.302     | 0.288     | 0.212      | 0.257      | 0.441             | 0.323             | <b>0.476</b>      | 0.344             | 0.556             | 0.354             |
|                        | Acc.2    | 0.663       | 0.729        | 0.649     | 0.729        | 0.500    | 0.549    | 0.569     | 0.552     | 0.618       | 0.590       | 0.538     | 0.531     | 0.490      | 0.493      | <b>0.733</b>      | 0.628             | 0.722             | 0.625             | 0.764             | 0.667             |
| A3                     | $\kappa$ | 0.639       | 0.514        | 0.421     | 0.843        | 0.255    | 0.356    | 0.282     | 0.120     | 0.454       | 0.060       | 0.167     | 0.167     | 0.167      | 0.157      | <b>0.847</b>      | 0.255             | 0.718             | 0.259             | 0.861             | 0.273             |
|                        | AUC      | 0.913       | 0.847        | 0.806     | 0.985        | 0.731    | 0.748    | 0.734     | 0.603     | 0.810       | 0.593       | 0.647     | 0.662     | 0.652      | 0.619      | <b>0.982</b>      | 0.775             | 0.938             | 0.785             | 0.982             | 0.795             |
|                        | BAcc     | 0.729       | 0.635        | 0.566     | 0.882        | 0.441    | 0.517    | 0.462     | 0.340     | 0.590       | 0.295       | 0.375     | 0.375     | 0.375      | 0.368      | <b>0.885</b>      | 0.441             | 0.788             | 0.444             | 0.896             | 0.455             |
|                        | Acc.1    | 0.729       | 0.635        | 0.566     | 0.882        | 0.441    | 0.517    | 0.462     | 0.340     | 0.590       | 0.295       | 0.375     | 0.375     | 0.375      | 0.368      | <b>0.885</b>      | 0.438             | 0.788             | 0.444             | 0.896             | 0.455             |
|                        | Acc.2    | 0.878       | 0.826        | 0.802     | <b>0.976</b> | 0.726    | 0.733    | 0.733     | 0.590     | 0.778       | 0.580       | 0.632     | 0.712     | 0.628      | 0.615      | 0.979             | 0.771             | 0.927             | 0.799             | 0.969             | 0.788             |
| A4                     | $\kappa$ | 0.347       | 0.375        | 0.241     | <b>0.454</b> | 0.093    | 0.056    | 0.162     | 0.060     | 0.324       | 0.093       | 0.185     | 0.227     | 0.042      | 0.060      | 0.306             | 0.199             | 0.412             | 0.222             | 0.458             | 0.208             |
|                        | AUC      | 0.757       | <b>0.812</b> | 0.689     | 0.841        | 0.582    | 0.575    | 0.650     | 0.569     | 0.727       | 0.578       | 0.636     | 0.694     | 0.541      | 0.570      | 0.758             | 0.716             | 0.802             | 0.702             | 0.807             | 0.708             |
|                        | BAcc     | 0.510       | 0.531        | 0.431     | <b>0.590</b> | 0.319    | 0.292    | 0.372     | 0.295     | 0.493       | 0.319       | 0.389     | 0.420     | 0.281      | 0.295      | 0.479             | 0.399             | 0.559             | 0.417             | 0.594             | 0.406             |
|                        | Acc.1    | 0.510       | 0.531        | 0.431     | <b>0.590</b> | 0.319    | 0.292    | 0.372     | 0.295     | 0.493       | 0.319       | 0.389     | 0.420     | 0.281      | 0.295      | 0.479             | 0.399             | 0.559             | 0.417             | 0.594             | 0.406             |
|                        | Acc.2    | 0.743       | 0.802        | 0.688     | 0.840        | 0.615    | 0.583    | 0.646     | 0.556     | 0.698       | 0.569       | 0.628     | 0.660     | 0.583      | 0.587      | 0.792             | 0.670             | 0.806             | 0.670             | <b>0.819</b>      | 0.688             |
| A5                     | $\kappa$ | 0.583       | 0.565        | 0.583     | 0.639        | 0.083    | 0.014    | 0.264     | 0.060     | 0.435       | 0.134       | 0.125     | 0.051     | 0.083      | 0.065      | 0.449             | 0.111             | 0.574             | 0.120             | <b>0.625</b>      | 0.144             |
|                        | AUC      | 0.885       | 0.904        | 0.867     | 0.910        | 0.537    | 0.523    | 0.708     | 0.570     | 0.813       | 0.587       | 0.594     | 0.565     | 0.562      | 0.547      | 0.832             | 0.602             | 0.847             | 0.601             | <b>0.909</b>      | 0.632             |
|                        | BAcc     | 0.688       | 0.674        | 0.688     | 0.729        | 0.312    | 0.260    | 0.448     | 0.295     | 0.576       | 0.351       | 0.344     | 0.288     | 0.312      | 0.299      | 0.587             | 0.333             | 0.681             | 0.340             | <b>0.719</b>      | 0.358             |
|                        | Acc.1    | 0.688       | 0.674        | 0.688     | 0.729        | 0.312    | 0.260    | 0.448     | 0.295     | 0.576       | 0.351       | 0.344     | 0.288     | 0.312      | 0.299      | 0.587             | 0.330             | 0.681             | 0.340             | <b>0.719</b>      | 0.358             |
| Continued on next page |          |             |              |           |              |          |          |           |           |             |             |           |           |            |            |                   |                   |                   |                   |                   |                   |

744  
745  
746  
747  
748  
749  
750  
751  
752  
753  
754  
755  
756  
757  
758  
759  
760  
761  
762  
763  
764  
765  
766  
767  
768  
769  
770  
771  
772  
773  
774  
775  
776

| Subject | Metric   | DeepConvnet | EEGNet | Conformer | CTNet | BIOT (f) | BIOT (l) | BENDR (f) | BENDR (l) | CBraMod (f) | CBraMod (l) | EEGPT (f) | EEGPT (l) | LaBraM (f) | LaBraM (l) | STEEGformer-s (f) | STEEGformer-s (l) | STEEGformer-b (f) | STEEGformer-b (l) | STEEGformer-l (f) | STEEGformer-l (l) |
|---------|----------|-------------|--------|-----------|-------|----------|----------|-----------|-----------|-------------|-------------|-----------|-----------|------------|------------|-------------------|-------------------|-------------------|-------------------|-------------------|-------------------|
| A6      | Acc_2    | 0.882       | 0.882  | 0.837     | 0.899 | 0.517    | 0.521    | 0.670     | 0.580     | 0.802       | 0.615       | 0.587     | 0.566     | 0.583      | 0.535      | 0.812             | 0.549             | 0.819             | 0.576             | 0.889             | 0.583             |
|         | $\kappa$ | 0.171       | 0.301  | 0.241     | 0.356 | 0.065    | 0.120    | 0.134     | 0.019     | 0.241       | 0.116       | 0.097     | 0.130     | 0.074      | -0.019     | 0.264             | 0.190             | 0.282             | 0.213             | 0.398             | 0.167             |
|         | AUC      | 0.693       | 0.748  | 0.698     | 0.799 | 0.543    | 0.568    | 0.629     | 0.507     | 0.702       | 0.601       | 0.602     | 0.609     | 0.548      | 0.515      | 0.703             | 0.630             | 0.718             | 0.649             | 0.753             | 0.651             |
|         | BAcc     | 0.378       | 0.476  | 0.431     | 0.517 | 0.299    | 0.340    | 0.351     | 0.264     | 0.431       | 0.337       | 0.323     | 0.347     | 0.306      | 0.236      | 0.448             | 0.392             | 0.462             | 0.410             | 0.549             | 0.375             |
|         | Acc_1    | 0.378       | 0.476  | 0.431     | 0.517 | 0.299    | 0.340    | 0.351     | 0.264     | 0.431       | 0.337       | 0.323     | 0.347     | 0.306      | 0.236      | 0.448             | 0.392             | 0.462             | 0.410             | 0.549             | 0.375             |
| A7      | Acc_2    | 0.705       | 0.733  | 0.681     | 0.833 | 0.531    | 0.549    | 0.625     | 0.531     | 0.701       | 0.628       | 0.611     | 0.628     | 0.562      | 0.528      | 0.712             | 0.632             | 0.757             | 0.660             | 0.750             | 0.618             |
|         | $\kappa$ | 0.551       | 0.505  | 0.472     | 0.565 | 0.236    | 0.199    | 0.306     | 0.088     | 0.366       | 0.171       | 0.190     | 0.157     | 0.227      | 0.069      | 0.708             | 0.208             | 0.579             | 0.120             | 0.708             | 0.120             |
|         | AUC      | 0.882       | 0.874  | 0.837     | 0.912 | 0.704    | 0.713    | 0.748     | 0.579     | 0.790       | 0.674       | 0.631     | 0.646     | 0.671      | 0.555      | 0.938             | 0.770             | 0.900             | 0.761             | 0.960             | 0.799             |
|         | BAcc     | 0.663       | 0.628  | 0.604     | 0.674 | 0.427    | 0.399    | 0.479     | 0.316     | 0.524       | 0.378       | 0.392     | 0.368     | 0.420      | 0.302      | 0.781             | 0.406             | 0.684             | 0.340             | 0.781             | 0.340             |
|         | Acc_1    | 0.663       | 0.628  | 0.604     | 0.674 | 0.427    | 0.399    | 0.479     | 0.316     | 0.524       | 0.378       | 0.392     | 0.368     | 0.420      | 0.302      | 0.781             | 0.406             | 0.684             | 0.340             | 0.781             | 0.340             |
| A8      | Acc_2    | 0.858       | 0.858  | 0.840     | 0.906 | 0.681    | 0.681    | 0.712     | 0.608     | 0.792       | 0.625       | 0.660     | 0.632     | 0.684      | 0.552      | 0.913             | 0.601             | 0.878             | 0.580             | 0.965             | 0.597             |
|         | $\kappa$ | 0.366       | 0.519  | 0.389     | 0.681 | 0.333    | 0.213    | 0.218     | 0.106     | 0.269       | 0.157       | 0.134     | 0.157     | 0.162      | 0.120      | 0.560             | 0.264             | 0.685             | 0.306             | 0.764             | 0.204             |
|         | AUC      | 0.844       | 0.880  | 0.783     | 0.936 | 0.761    | 0.704    | 0.651     | 0.593     | 0.714       | 0.637       | 0.613     | 0.635     | 0.623      | 0.599      | 0.879             | 0.732             | 0.919             | 0.721             | 0.943             | 0.711             |
|         | BAcc     | 0.524       | 0.639  | 0.542     | 0.760 | 0.500    | 0.410    | 0.413     | 0.330     | 0.451       | 0.368       | 0.351     | 0.368     | 0.372      | 0.340      | 0.670             | 0.448             | 0.764             | 0.479             | 0.823             | 0.403             |
|         | Acc_1    | 0.524       | 0.639  | 0.542     | 0.760 | 0.500    | 0.410    | 0.413     | 0.330     | 0.451       | 0.368       | 0.351     | 0.368     | 0.372      | 0.337      | 0.670             | 0.448             | 0.764             | 0.479             | 0.823             | 0.403             |
| A9      | Acc_2    | 0.750       | 0.889  | 0.767     | 0.934 | 0.774    | 0.663    | 0.642     | 0.608     | 0.722       | 0.632       | 0.604     | 0.635     | 0.628      | 0.594      | 0.861             | 0.701             | 0.913             | 0.698             | 0.948             | 0.649             |
|         | $\kappa$ | 0.597       | 0.472  | 0.366     | 0.639 | 0.468    | 0.403    | 0.236     | 0.120     | 0.370       | 0.120       | 0.231     | 0.296     | 0.389      | 0.208      | 0.685             | 0.421             | 0.653             | 0.435             | 0.727             | 0.505             |
|         | AUC      | 0.904       | 0.834  | 0.766     | 0.917 | 0.827    | 0.795    | 0.683     | 0.583     | 0.761       | 0.663       | 0.713     | 0.744     | 0.764      | 0.697      | 0.921             | 0.830             | 0.902             | 0.830             | 0.937             | 0.831             |
|         | BAcc     | 0.698       | 0.604  | 0.524     | 0.729 | 0.601    | 0.552    | 0.427     | 0.340     | 0.528       | 0.340       | 0.424     | 0.472     | 0.542      | 0.406      | 0.764             | 0.566             | 0.740             | 0.576             | 0.795             | 0.628             |
|         | Acc_1    | 0.698       | 0.604  | 0.524     | 0.729 | 0.601    | 0.552    | 0.427     | 0.340     | 0.524       | 0.340       | 0.424     | 0.472     | 0.542      | 0.406      | 0.764             | 0.569             | 0.740             | 0.576             | 0.795             | 0.628             |
| A9      | Acc_2    | 0.882       | 0.833  | 0.778     | 0.892 | 0.844    | 0.795    | 0.684     | 0.594     | 0.757       | 0.632       | 0.705     | 0.740     | 0.774      | 0.670      | 0.906             | 0.809             | 0.875             | 0.826             | 0.931             | 0.833             |

## B.2.2 PER-SUBJECT ZERO-SHOT TRANSFER

Table 7: Average Zero-Shot Transfer Performance Across All Subjects

| Model (Training strategy) | $\kappa$     | AUC          | BAcc         | Acc.1        | Acc.2        |
|---------------------------|--------------|--------------|--------------|--------------|--------------|
|                           | 0.129        | 0.632        | 0.347        | 0.347        | 0.616        |
| <b>DeepConvnet</b>        | $\pm 0.038$  | $\pm 0.023$  | $\pm 0.029$  | $\pm 0.029$  | $\pm 0.026$  |
|                           | 0.146        | 0.635        | 0.359        | 0.359        | <b>0.625</b> |
| <b>EEGNet</b>             | $\pm 0.025$  | $\pm 0.017$  | $\pm 0.018$  | $\pm 0.018$  | $\pm 0.014$  |
|                           | 0.128        | 0.611        | 0.346        | 0.346        | 0.607        |
| <b>Conformer</b>          | $\pm 0.032$  | $\pm 0.021$  | $\pm 0.024$  | $\pm 0.024$  | $\pm 0.015$  |
|                           | 0.175        | 0.675        | 0.381        | 0.381        | 0.648        |
| <b>CTNet</b>              | $\pm 0.031$  | $\pm 0.022$  | $\pm 0.024$  | $\pm 0.024$  | $\pm 0.025$  |
|                           | 0.031        | 0.534        | 0.273        | 0.273        | 0.531        |
| <b>BIOT (f)</b>           | $\pm 0.026$  | $\pm 0.026$  | $\pm 0.019$  | $\pm 0.019$  | $\pm 0.021$  |
|                           | 0.034        | 0.539        | 0.276        | 0.276        | 0.531        |
| <b>BIOT (l)</b>           | $\pm 0.027$  | $\pm 0.025$  | $\pm 0.020$  | $\pm 0.020$  | $\pm 0.021$  |
|                           | 0.067        | 0.561        | 0.301        | 0.301        | 0.562        |
| <b>BENDR (f)</b>          | $\pm 0.014$  | $\pm 0.009$  | $\pm 0.011$  | $\pm 0.011$  | $\pm 0.008$  |
|                           | 0.025        | 0.522        | 0.269        | 0.269        | 0.522        |
| <b>BENDR (l)</b>          | $\pm 0.012$  | $\pm 0.006$  | $\pm 0.009$  | $\pm 0.009$  | $\pm 0.009$  |
|                           | 0.099        | 0.587        | 0.325        | 0.325        | 0.582        |
| <b>CBraMod (f)</b>        | $\pm 0.023$  | $\pm 0.016$  | $\pm 0.017$  | $\pm 0.017$  | $\pm 0.015$  |
|                           | 0.040        | 0.546        | 0.280        | 0.280        | 0.541        |
| <b>CBraMod (l)</b>        | $\pm 0.020$  | $\pm 0.010$  | $\pm 0.015$  | $\pm 0.015$  | $\pm 0.015$  |
|                           | 0.036        | 0.533        | 0.277        | 0.277        | 0.531        |
| <b>EEGPT (f)</b>          | $\pm 0.019$  | $\pm 0.016$  | $\pm 0.014$  | $\pm 0.014$  | $\pm 0.016$  |
|                           | 0.043        | 0.541        | 0.283        | 0.283        | 0.535        |
| <b>EEGPT (l)</b>          | $\pm 0.019$  | $\pm 0.021$  | $\pm 0.014$  | $\pm 0.014$  | $\pm 0.019$  |
|                           | 0.038        | 0.538        | 0.278        | 0.278        | 0.531        |
| <b>LaBraM (f)</b>         | $\pm 0.016$  | $\pm 0.018$  | $\pm 0.012$  | $\pm 0.012$  | $\pm 0.010$  |
|                           | 0.018        | 0.531        | 0.263        | 0.263        | 0.518        |
| <b>LaBraM (l)</b>         | $\pm 0.015$  | $\pm 0.013$  | $\pm 0.011$  | $\pm 0.011$  | $\pm 0.011$  |
|                           | 0.108        | 0.613        | 0.331        | 0.331        | 0.581        |
| <b>STEEGformer-s (f)</b>  | $\pm 0.057$  | $\pm 0.055$  | $\pm 0.043$  | $\pm 0.043$  | $\pm 0.034$  |
|                           | 0.032        | 0.602        | 0.274        | 0.274        | 0.539        |
| <b>STEEGformer-s (l)</b>  | $\pm 0.023$  | $\pm 0.023$  | $\pm 0.017$  | $\pm 0.017$  | $\pm 0.012$  |
|                           | 0.127        | 0.625        | 0.345        | 0.345        | 0.593        |
| <b>STEEGformer-b (f)</b>  | $\pm 0.051$  | $\pm 0.039$  | $\pm 0.038$  | $\pm 0.038$  | $\pm 0.036$  |
|                           | 0.029        | 0.596        | 0.272        | 0.272        | 0.538        |
| <b>STEEGformer-b (l)</b>  | $\pm 0.019$  | $\pm 0.020$  | $\pm 0.014$  | $\pm 0.014$  | $\pm 0.014$  |
|                           | <b>0.151</b> | <b>0.645</b> | <b>0.364</b> | <b>0.364</b> | 0.612        |
| <b>STEEGformer-l (f)</b>  | $\pm 0.046$  | $\pm 0.045$  | $\pm 0.035$  | $\pm 0.035$  | $\pm 0.031$  |
|                           | 0.028        | 0.600        | 0.271        | 0.271        | 0.533        |
| <b>STEEGformer-l (l)</b>  | $\pm 0.015$  | $\pm 0.022$  | $\pm 0.011$  | $\pm 0.011$  | $\pm 0.017$  |

Table 8: Per-Subject Zero-Shot Transfer Performance

| Subject | Metric   | DeepConvnet                 | EEGNet                      | Conformer                   | CTNet                       | BIOT (f)             | BIOT (l)             | BENDR (f)            | BENDR (l)            | CBraMod (f)          | CBraMod (l)          | EEGPT (f)            | EEGPT (l)            | LaBraM (f)           | LaBraM (l)           | STEEGformer-s (f)     | STEEGformer-s (l)    | STEEGformer-b (f)    | STEEGformer-b (l)    | STEEGformer-l (f)           | STEEGformer-l (l)    |
|---------|----------|-----------------------------|-----------------------------|-----------------------------|-----------------------------|----------------------|----------------------|----------------------|----------------------|----------------------|----------------------|----------------------|----------------------|----------------------|----------------------|-----------------------|----------------------|----------------------|----------------------|-----------------------------|----------------------|
| A1      | $\kappa$ | <b>0.150</b><br>$\pm 0.071$ | 0.144<br>$\pm 0.085$        | 0.103<br>$\pm 0.034$        | 0.173<br>$\pm 0.135$        | 0.030<br>$\pm 0.048$ | 0.047<br>$\pm 0.047$ | 0.046<br>$\pm 0.025$ | 0.009<br>$\pm 0.044$ | 0.072<br>$\pm 0.035$ | 0.082<br>$\pm 0.023$ | 0.061<br>$\pm 0.058$ | 0.063<br>$\pm 0.075$ | 0.036<br>$\pm 0.035$ | 0.017<br>$\pm 0.041$ | 0.098<br>$\pm 0.110$  | 0.022<br>$\pm 0.030$ | 0.080<br>$\pm 0.092$ | 0.031<br>$\pm 0.040$ | 0.101<br>$\pm 0.148$        | 0.014<br>$\pm 0.035$ |
|         | AUC      | <b>0.651</b><br>$\pm 0.061$ | 0.647<br>$\pm 0.051$        | 0.598<br>$\pm 0.030$        | 0.690<br>$\pm 0.088$        | 0.539<br>$\pm 0.046$ | 0.554<br>$\pm 0.058$ | 0.550<br>$\pm 0.018$ | 0.516<br>$\pm 0.014$ | 0.566<br>$\pm 0.029$ | 0.567<br>$\pm 0.028$ | 0.542<br>$\pm 0.043$ | 0.563<br>$\pm 0.046$ | 0.551<br>$\pm 0.040$ | 0.552<br>$\pm 0.056$ | 0.621<br>$\pm 0.083$  | 0.624<br>$\pm 0.070$ | 0.608<br>$\pm 0.050$ | 0.613<br>$\pm 0.078$ | 0.623<br>$\pm 0.103$        | 0.623<br>$\pm 0.076$ |
|         | BAcc     | <b>0.362</b><br>$\pm 0.054$ | 0.358<br>$\pm 0.064$        | 0.327<br>$\pm 0.026$        | 0.380<br>$\pm 0.101$        | 0.272<br>$\pm 0.036$ | 0.285<br>$\pm 0.035$ | 0.284<br>$\pm 0.019$ | 0.257<br>$\pm 0.033$ | 0.304<br>$\pm 0.026$ | 0.311<br>$\pm 0.017$ | 0.296<br>$\pm 0.044$ | 0.297<br>$\pm 0.056$ | 0.277<br>$\pm 0.026$ | 0.263<br>$\pm 0.031$ | 0.323<br>$\pm 0.082$  | 0.266<br>$\pm 0.023$ | 0.310<br>$\pm 0.069$ | 0.273<br>$\pm 0.030$ | 0.326<br>$\pm 0.111$        | 0.260<br>$\pm 0.026$ |
|         | Acc.1    | <b>0.362</b><br>$\pm 0.054$ | 0.358<br>$\pm 0.064$        | 0.327<br>$\pm 0.026$        | 0.380<br>$\pm 0.101$        | 0.272<br>$\pm 0.036$ | 0.285<br>$\pm 0.035$ | 0.284<br>$\pm 0.019$ | 0.257<br>$\pm 0.033$ | 0.304<br>$\pm 0.026$ | 0.311<br>$\pm 0.017$ | 0.296<br>$\pm 0.044$ | 0.297<br>$\pm 0.056$ | 0.277<br>$\pm 0.026$ | 0.263<br>$\pm 0.031$ | 0.323<br>$\pm 0.082$  | 0.266<br>$\pm 0.023$ | 0.309<br>$\pm 0.068$ | 0.273<br>$\pm 0.030$ | 0.326<br>$\pm 0.111$        | 0.261<br>$\pm 0.026$ |
|         | Acc.2    | <b>0.631</b><br>$\pm 0.085$ | 0.616<br>$\pm 0.047$        | 0.595<br>$\pm 0.023$        | 0.635<br>$\pm 0.089$        | 0.545<br>$\pm 0.047$ | 0.547<br>$\pm 0.052$ | 0.558<br>$\pm 0.018$ | 0.528<br>$\pm 0.018$ | 0.565<br>$\pm 0.035$ | 0.571<br>$\pm 0.028$ | 0.532<br>$\pm 0.044$ | 0.552<br>$\pm 0.049$ | 0.536<br>$\pm 0.033$ | 0.535<br>$\pm 0.043$ | 0.571<br>$\pm 0.096$  | 0.539<br>$\pm 0.048$ | 0.554<br>$\pm 0.062$ | 0.536<br>$\pm 0.044$ | 0.586<br>$\pm 0.110$        | 0.527<br>$\pm 0.038$ |
| A2      | $\kappa$ | 0.112<br>$\pm 0.044$        | 0.109<br>$\pm 0.058$        | <b>0.116</b><br>$\pm 0.044$ | 0.135<br>$\pm 0.048$        | 0.014<br>$\pm 0.030$ | 0.036<br>$\pm 0.043$ | 0.057<br>$\pm 0.027$ | 0.021<br>$\pm 0.030$ | 0.090<br>$\pm 0.040$ | 0.014<br>$\pm 0.032$ | 0.022<br>$\pm 0.042$ | 0.025<br>$\pm 0.018$ | 0.037<br>$\pm 0.027$ | 0.008<br>$\pm 0.030$ | -0.020<br>$\pm 0.032$ | 0.010<br>$\pm 0.017$ | 0.045<br>$\pm 0.049$ | 0.014<br>$\pm 0.051$ | 0.072<br>$\pm 0.079$        | 0.023<br>$\pm 0.067$ |
|         | AUC      | 0.604<br>$\pm 0.027$        | <b>0.619</b><br>$\pm 0.032$ | 0.601<br>$\pm 0.025$        | 0.639<br>$\pm 0.026$        | 0.519<br>$\pm 0.027$ | 0.536<br>$\pm 0.032$ | 0.560<br>$\pm 0.019$ | 0.527<br>$\pm 0.024$ | 0.575<br>$\pm 0.021$ | 0.533<br>$\pm 0.026$ | 0.515<br>$\pm 0.019$ | 0.514<br>$\pm 0.016$ | 0.529<br>$\pm 0.013$ | 0.518<br>$\pm 0.015$ | 0.494<br>$\pm 0.018$  | 0.572<br>$\pm 0.044$ | 0.558<br>$\pm 0.051$ | 0.570<br>$\pm 0.049$ | 0.571<br>$\pm 0.048$        | 0.559<br>$\pm 0.057$ |
|         | BAcc     | 0.334<br>$\pm 0.033$        | 0.332<br>$\pm 0.044$        | <b>0.337</b><br>$\pm 0.033$ | 0.351<br>$\pm 0.036$        | 0.260<br>$\pm 0.022$ | 0.277<br>$\pm 0.032$ | 0.293<br>$\pm 0.020$ | 0.266<br>$\pm 0.022$ | 0.318<br>$\pm 0.030$ | 0.261<br>$\pm 0.024$ | 0.266<br>$\pm 0.031$ | 0.269<br>$\pm 0.014$ | 0.278<br>$\pm 0.020$ | 0.256<br>$\pm 0.022$ | 0.235<br>$\pm 0.024$  | 0.257<br>$\pm 0.013$ | 0.284<br>$\pm 0.037$ | 0.260<br>$\pm 0.038$ | 0.304<br>$\pm 0.059$        | 0.267<br>$\pm 0.050$ |
|         | Acc.1    | 0.334<br>$\pm 0.033$        | 0.332<br>$\pm 0.044$        | <b>0.337</b><br>$\pm 0.033$ | 0.351<br>$\pm 0.036$        | 0.260<br>$\pm 0.022$ | 0.277<br>$\pm 0.032$ | 0.293<br>$\pm 0.020$ | 0.266<br>$\pm 0.022$ | 0.318<br>$\pm 0.030$ | 0.261<br>$\pm 0.024$ | 0.266<br>$\pm 0.031$ | 0.269<br>$\pm 0.014$ | 0.278<br>$\pm 0.020$ | 0.257<br>$\pm 0.022$ | 0.235<br>$\pm 0.024$  | 0.257<br>$\pm 0.013$ | 0.284<br>$\pm 0.037$ | 0.261<br>$\pm 0.037$ | 0.304<br>$\pm 0.059$        | 0.267<br>$\pm 0.050$ |
|         | Acc.2    | 0.599<br>$\pm 0.033$        | 0.610<br>$\pm 0.026$        | 0.609<br>$\pm 0.027$        | <b>0.609</b><br>$\pm 0.034$ | 0.522<br>$\pm 0.030$ | 0.543<br>$\pm 0.038$ | 0.555<br>$\pm 0.021$ | 0.526<br>$\pm 0.035$ | 0.567<br>$\pm 0.027$ | 0.525<br>$\pm 0.027$ | 0.520<br>$\pm 0.024$ | 0.505<br>$\pm 0.021$ | 0.534<br>$\pm 0.012$ | 0.516<br>$\pm 0.019$ | 0.506<br>$\pm 0.029$  | 0.540<br>$\pm 0.050$ | 0.532<br>$\pm 0.051$ | 0.534<br>$\pm 0.039$ | 0.559<br>$\pm 0.046$        | 0.533<br>$\pm 0.039$ |
| A3      | $\kappa$ | 0.092<br>$\pm 0.074$        | 0.127<br>$\pm 0.061$        | 0.123<br>$\pm 0.047$        | <b>0.178</b><br>$\pm 0.081$ | 0.070<br>$\pm 0.058$ | 0.054<br>$\pm 0.040$ | 0.090<br>$\pm 0.031$ | 0.041<br>$\pm 0.013$ | 0.128<br>$\pm 0.050$ | 0.050<br>$\pm 0.062$ | 0.062<br>$\pm 0.050$ | 0.053<br>$\pm 0.047$ | 0.049<br>$\pm 0.041$ | 0.000<br>$\pm 0.011$ | 0.132<br>$\pm 0.140$  | 0.068<br>$\pm 0.076$ | 0.119<br>$\pm 0.158$ | 0.038<br>$\pm 0.084$ | 0.203<br>$\pm 0.197$        | 0.027<br>$\pm 0.062$ |
|         | AUC      | 0.625<br>$\pm 0.027$        | 0.615<br>$\pm 0.047$        | 0.608<br>$\pm 0.029$        | 0.704<br>$\pm 0.058$        | 0.565<br>$\pm 0.044$ | 0.554<br>$\pm 0.052$ | 0.576<br>$\pm 0.025$ | 0.523<br>$\pm 0.014$ | 0.605<br>$\pm 0.033$ | 0.552<br>$\pm 0.045$ | 0.557<br>$\pm 0.042$ | 0.558<br>$\pm 0.036$ | 0.554<br>$\pm 0.039$ | 0.529<br>$\pm 0.031$ | 0.684<br>$\pm 0.105$  | 0.644<br>$\pm 0.107$ | 0.643<br>$\pm 0.110$ | 0.634<br>$\pm 0.106$ | <b>0.685</b><br>$\pm 0.130$ | 0.634<br>$\pm 0.115$ |
|         | BAcc     | 0.319<br>$\pm 0.056$        | 0.345<br>$\pm 0.046$        | 0.342<br>$\pm 0.035$        | <b>0.384</b><br>$\pm 0.061$ | 0.303<br>$\pm 0.044$ | 0.291<br>$\pm 0.030$ | 0.318<br>$\pm 0.023$ | 0.281<br>$\pm 0.010$ | 0.346<br>$\pm 0.038$ | 0.287<br>$\pm 0.046$ | 0.297<br>$\pm 0.038$ | 0.289<br>$\pm 0.035$ | 0.287<br>$\pm 0.031$ | 0.250<br>$\pm 0.008$ | 0.349<br>$\pm 0.105$  | 0.301<br>$\pm 0.057$ | 0.339<br>$\pm 0.118$ | 0.279<br>$\pm 0.063$ | 0.402<br>$\pm 0.147$        | 0.270<br>$\pm 0.047$ |
|         | Acc.1    | 0.319<br>$\pm 0.056$        | 0.345<br>$\pm 0.046$        | 0.342<br>$\pm 0.035$        | <b>0.384</b><br>$\pm 0.061$ | 0.303<br>$\pm 0.044$ | 0.291<br>$\pm 0.030$ | 0.318<br>$\pm 0.024$ | 0.281<br>$\pm 0.010$ | 0.346<br>$\pm 0.038$ | 0.287<br>$\pm 0.046$ | 0.297<br>$\pm 0.038$ | 0.289<br>$\pm 0.035$ | 0.287<br>$\pm 0.031$ | 0.250<br>$\pm 0.008$ | 0.349<br>$\pm 0.105$  | 0.301<br>$\pm 0.057$ | 0.339<br>$\pm 0.118$ | 0.279<br>$\pm 0.063$ | 0.402<br>$\pm 0.147$        | 0.270<br>$\pm 0.047$ |
|         | Acc.2    | 0.617<br>$\pm 0.021$        | 0.603<br>$\pm 0.053$        | 0.607<br>$\pm 0.030$        | 0.684<br>$\pm 0.068$        | 0.556<br>$\pm 0.034$ | 0.559<br>$\pm 0.063$ | 0.576<br>$\pm 0.030$ | 0.526<br>$\pm 0.022$ | 0.591<br>$\pm 0.039$ | 0.534<br>$\pm 0.043$ | 0.549<br>$\pm 0.033$ | 0.542<br>$\pm 0.035$ | 0.537<br>$\pm 0.037$ | 0.515<br>$\pm 0.019$ | 0.620<br>$\pm 0.111$  | 0.563<br>$\pm 0.105$ | 0.602<br>$\pm 0.121$ | 0.560<br>$\pm 0.094$ | <b>0.640</b><br>$\pm 0.126$ | 0.539<br>$\pm 0.097$ |

Continued on next page

A7

Continued on next page



| Subject | Metric | DeepConvnet      | EEGNet           | Conformer       | CTNet            | BIOT (f)        | BIOT (l)        | BENDR (f)       | BENDR (l)       | CBraMod (f)     | CBraMod (l)     | EEGPT (f)       | EEGPT (l)       | LaBraM (f)      | LaBraM (l)      | STEEGformer-s (f) | STEEGformer-s (l) | STEEGformer-b (f) | STEEGformer-b (l) | STEEGformer-l (f) | STEEGformer-l (l) |
|---------|--------|------------------|------------------|-----------------|------------------|-----------------|-----------------|-----------------|-----------------|-----------------|-----------------|-----------------|-----------------|-----------------|-----------------|-------------------|-------------------|-------------------|-------------------|-------------------|-------------------|
| A8      | AUC    | 0.658<br>±0.066  | 0.642<br>±0.073  | 0.640<br>±0.055 | 0.690<br>± 0.073 | 0.568<br>±0.050 | 0.568<br>±0.061 | 0.576<br>±0.049 | 0.517<br>±0.025 | 0.607<br>±0.054 | 0.549<br>±0.031 | 0.523<br>±0.020 | 0.536<br>±0.014 | 0.550<br>±0.024 | 0.534<br>±0.023 | 0.660<br>±0.110   | 0.624<br>±0.083   | 0.683<br>±0.115   | 0.619<br>±0.086   | 0.697<br>± 0.107  | 0.625<br>±0.088   |
|         | BAcc   | 0.396<br>±0.067  | 0.366<br>±0.069  | 0.372<br>±0.047 | 0.419<br>± 0.082 | 0.302<br>±0.043 | 0.283<br>±0.052 | 0.314<br>±0.040 | 0.264<br>±0.032 | 0.347<br>±0.062 | 0.274<br>±0.035 | 0.273<br>±0.025 | 0.286<br>±0.010 | 0.296<br>±0.026 | 0.269<br>±0.026 | 0.379<br>±0.116   | 0.298<br>±0.073   | 0.400<br>± 0.120  | 0.294<br>±0.065   | 0.376<br>±0.094   | 0.291<br>±0.059   |
|         | Acc.1  | 0.396<br>±0.067  | 0.366<br>±0.069  | 0.372<br>±0.047 | 0.419<br>± 0.082 | 0.302<br>±0.043 | 0.283<br>±0.052 | 0.315<br>±0.040 | 0.264<br>±0.032 | 0.347<br>±0.062 | 0.275<br>±0.035 | 0.273<br>±0.025 | 0.286<br>±0.010 | 0.296<br>±0.026 | 0.269<br>±0.026 | 0.379<br>±0.116   | 0.298<br>±0.073   | 0.400<br>± 0.120  | 0.294<br>±0.065   | 0.376<br>±0.094   | 0.291<br>±0.059   |
|         | Acc.2  | 0.661<br>± 0.065 | 0.642<br>±0.091  | 0.624<br>±0.071 | 0.645<br>± 0.062 | 0.552<br>±0.049 | 0.558<br>±0.076 | 0.574<br>±0.058 | 0.505<br>±0.037 | 0.599<br>±0.059 | 0.545<br>±0.023 | 0.513<br>±0.020 | 0.533<br>±0.015 | 0.542<br>±0.026 | 0.531<br>±0.016 | 0.608<br>±0.092   | 0.543<br>±0.066   | 0.629<br>±0.126   | 0.546<br>±0.061   | 0.636<br>±0.068   | 0.547<br>±0.070   |
|         | κ      | 0.142<br>±0.125  | 0.177<br>±0.085  | 0.153<br>±0.033 | 0.183<br>± 0.099 | 0.036<br>±0.042 | 0.075<br>±0.078 | 0.079<br>±0.026 | 0.028<br>±0.032 | 0.095<br>±0.036 | 0.047<br>±0.035 | 0.054<br>±0.045 | 0.065<br>±0.030 | 0.045<br>±0.030 | 0.021<br>±0.032 | 0.130<br>±0.120   | 0.026<br>±0.026   | 0.134<br>±0.128   | 0.020<br>±0.048   | 0.186<br>± 0.143  | 0.024<br>±0.028   |
|         | AUC    | 0.663<br>±0.070  | 0.659<br>±0.067  | 0.626<br>±0.035 | 0.681<br>± 0.068 | 0.557<br>±0.050 | 0.573<br>±0.060 | 0.555<br>±0.018 | 0.524<br>±0.022 | 0.588<br>±0.027 | 0.545<br>±0.036 | 0.547<br>±0.048 | 0.562<br>±0.035 | 0.552<br>±0.025 | 0.550<br>±0.044 | 0.622<br>±0.094   | 0.603<br>±0.079   | 0.625<br>±0.090   | 0.585<br>±0.068   | 0.698<br>± 0.096  | 0.595<br>±0.069   |
|         | BAcc   | 0.357<br>±0.094  | 0.382<br>±0.063  | 0.365<br>±0.024 | 0.387<br>± 0.075 | 0.277<br>±0.031 | 0.306<br>±0.058 | 0.309<br>±0.020 | 0.271<br>±0.024 | 0.321<br>±0.027 | 0.286<br>±0.026 | 0.290<br>±0.034 | 0.299<br>±0.023 | 0.283<br>±0.022 | 0.266<br>±0.024 | 0.348<br>±0.090   | 0.270<br>±0.020   | 0.351<br>±0.096   | 0.265<br>±0.036   | 0.389<br>± 0.107  | 0.268<br>±0.021   |
|         | Acc.1  | 0.357<br>±0.094  | 0.382<br>±0.063  | 0.365<br>±0.024 | 0.387<br>± 0.075 | 0.277<br>±0.031 | 0.306<br>±0.058 | 0.309<br>±0.020 | 0.271<br>±0.024 | 0.321<br>±0.027 | 0.286<br>±0.026 | 0.290<br>±0.034 | 0.299<br>±0.023 | 0.283<br>±0.022 | 0.266<br>±0.024 | 0.347<br>±0.089   | 0.270<br>±0.020   | 0.351<br>±0.096   | 0.265<br>±0.036   | 0.389<br>± 0.107  | 0.268<br>±0.021   |
|         | Acc.2  | 0.605<br>±0.090  | 0.638<br>±0.057  | 0.609<br>±0.038 | 0.669<br>± 0.075 | 0.539<br>±0.051 | 0.537<br>±0.043 | 0.563<br>±0.029 | 0.525<br>±0.026 | 0.578<br>±0.022 | 0.549<br>±0.034 | 0.547<br>±0.040 | 0.549<br>±0.031 | 0.539<br>±0.014 | 0.518<br>±0.023 | 0.608<br>±0.067   | 0.537<br>±0.058   | 0.587<br>±0.097   | 0.513<br>±0.035   | 0.645<br>± 0.107  | 0.511<br>±0.030   |
|         | A9     | κ                | 0.068<br>±0.049  | 0.163<br>±0.069 | 0.148<br>±0.073  | 0.153<br>±0.080 | 0.038<br>±0.049 | 0.038<br>±0.066 | 0.059<br>±0.044 | 0.036<br>±0.037 | 0.113<br>±0.043 | 0.010<br>±0.023 | 0.035<br>±0.037 | 0.061<br>±0.040 | 0.055<br>±0.060 | -0.011<br>±0.021  | 0.156<br>±0.150   | 0.005<br>±0.015   | 0.171<br>± 0.119  | 0.012<br>±0.031   | 0.203<br>± 0.145  |
| AUC     |        | 0.623<br>±0.052  | 0.645<br>±0.044  | 0.612<br>±0.054 | 0.681<br>± 0.062 | 0.543<br>±0.051 | 0.529<br>±0.048 | 0.561<br>±0.025 | 0.529<br>±0.018 | 0.602<br>±0.024 | 0.538<br>±0.022 | 0.547<br>±0.028 | 0.568<br>±0.034 | 0.557<br>±0.046 | 0.531<br>±0.038 | 0.642<br>±0.112   | 0.585<br>±0.058   | 0.665<br>±0.085   | 0.582<br>±0.057   | 0.675<br>± 0.111  | 0.582<br>±0.054   |
| BAcc    |        | 0.301<br>±0.037  | 0.372<br>±0.052  | 0.361<br>±0.055 | 0.365<br>±0.060  | 0.279<br>±0.037 | 0.278<br>±0.049 | 0.294<br>±0.033 | 0.277<br>±0.028 | 0.335<br>±0.032 | 0.257<br>±0.017 | 0.276<br>±0.028 | 0.296<br>±0.030 | 0.291<br>±0.045 | 0.242<br>±0.016 | 0.367<br>±0.112   | 0.253<br>±0.011   | 0.378<br>± 0.089  | 0.259<br>±0.023   | 0.402<br>± 0.108  | 0.260<br>±0.026   |
| Acc.1   |        | 0.301<br>±0.037  | 0.372<br>±0.052  | 0.361<br>±0.055 | 0.365<br>±0.060  | 0.279<br>±0.037 | 0.278<br>±0.049 | 0.294<br>±0.032 | 0.277<br>±0.028 | 0.335<br>±0.032 | 0.257<br>±0.017 | 0.276<br>±0.028 | 0.296<br>±0.030 | 0.291<br>±0.045 | 0.242<br>±0.017 | 0.367<br>±0.112   | 0.253<br>±0.011   | 0.378<br>± 0.089  | 0.259<br>±0.023   | 0.402<br>± 0.108  | 0.260<br>±0.026   |
| Acc.2   |        | 0.572<br>±0.041  | 0.632<br>± 0.043 | 0.605<br>±0.058 | 0.638<br>± 0.066 | 0.544<br>±0.047 | 0.516<br>±0.039 | 0.566<br>±0.034 | 0.532<br>±0.019 | 0.608<br>±0.032 | 0.520<br>±0.025 | 0.558<br>±0.034 | 0.568<br>±0.035 | 0.541<br>±0.033 | 0.506<br>±0.008 | 0.599<br>±0.108   | 0.514<br>±0.036   | 0.625<br>±0.099   | 0.523<br>±0.027   | 0.618<br>±0.128   | 0.500<br>±0.003   |

## B.3 LEAVE-ONE-OUT RESULTS

## B.3.1 LEAVE-ONE-OUT ZERO-SHOT EVALUATION

Table 9: Average Leave-One-Out Zero-Shot Performance Across All Subjects.

| Model (Training strategy) | $\kappa$     | AUC          | BAcc         | Acc.1        | Acc.2        |
|---------------------------|--------------|--------------|--------------|--------------|--------------|
|                           | 0.418        | 0.838        | 0.563        | 0.563        | 0.804        |
| <b>DeepConvnet</b>        | $\pm 0.108$  | $\pm 0.069$  | $\pm 0.081$  | $\pm 0.081$  | $\pm 0.068$  |
|                           | <b>0.454</b> | <b>0.858</b> | <b>0.591</b> | <b>0.591</b> | <b>0.824</b> |
| <b>EEGNet</b>             | $\pm 0.129$  | $\pm 0.063$  | $\pm 0.097$  | $\pm 0.097$  | $\pm 0.069$  |
|                           | 0.308        | 0.738        | 0.481        | 0.481        | 0.731        |
| <b>Conformer</b>          | $\pm 0.092$  | $\pm 0.062$  | $\pm 0.069$  | $\pm 0.069$  | $\pm 0.043$  |
|                           | 0.489        | 0.876        | 0.617        | 0.617        | 0.829        |
| <b>CTNet</b>              | $\pm 0.150$  | $\pm 0.068$  | $\pm 0.112$  | $\pm 0.112$  | $\pm 0.089$  |
|                           | 0.084        | 0.578        | 0.313        | 0.313        | 0.576        |
| <b>BIOT (f)</b>           | $\pm 0.094$  | $\pm 0.064$  | $\pm 0.071$  | $\pm 0.071$  | $\pm 0.064$  |
|                           | 0.086        | 0.597        | 0.315        | 0.315        | 0.565        |
| <b>BIOT (l)</b>           | $\pm 0.071$  | $\pm 0.071$  | $\pm 0.053$  | $\pm 0.053$  | $\pm 0.065$  |
|                           | 0.217        | 0.676        | 0.412        | 0.412        | 0.657        |
| <b>BENDR (f)</b>          | $\pm 0.063$  | $\pm 0.046$  | $\pm 0.047$  | $\pm 0.048$  | $\pm 0.044$  |
|                           | 0.065        | 0.555        | 0.299        | 0.299        | 0.555        |
| <b>BENDR (l)</b>          | $\pm 0.026$  | $\pm 0.024$  | $\pm 0.020$  | $\pm 0.021$  | $\pm 0.034$  |
|                           | 0.359        | 0.775        | 0.519        | 0.519        | 0.750        |
| <b>CBraMod (f)</b>        | $\pm 0.097$  | $\pm 0.062$  | $\pm 0.073$  | $\pm 0.073$  | $\pm 0.058$  |
|                           | 0.114        | 0.623        | 0.335        | 0.335        | 0.607        |
| <b>CBraMod (l)</b>        | $\pm 0.039$  | $\pm 0.050$  | $\pm 0.029$  | $\pm 0.030$  | $\pm 0.039$  |
|                           | 0.129        | 0.618        | 0.347        | 0.347        | 0.614        |
| <b>EEGPT (f)</b>          | $\pm 0.049$  | $\pm 0.035$  | $\pm 0.037$  | $\pm 0.037$  | $\pm 0.033$  |
|                           | 0.330        | 0.774        | 0.498        | 0.498        | 0.745        |
| <b>EEGPT (l)</b>          | $\pm 0.137$  | $\pm 0.064$  | $\pm 0.103$  | $\pm 0.103$  | $\pm 0.094$  |
|                           | 0.081        | 0.573        | 0.311        | 0.311        | 0.576        |
| <b>LaBraM (f)</b>         | $\pm 0.056$  | $\pm 0.040$  | $\pm 0.042$  | $\pm 0.042$  | $\pm 0.050$  |
|                           | 0.040        | 0.557        | 0.280        | 0.279        | 0.535        |
| <b>LaBraM (l)</b>         | $\pm 0.044$  | $\pm 0.050$  | $\pm 0.033$  | $\pm 0.031$  | $\pm 0.042$  |
|                           | 0.349        | 0.746        | 0.512        | 0.512        | 0.735        |
| <b>STEEGformer-s (f)</b>  | $\pm 0.166$  | $\pm 0.083$  | $\pm 0.125$  | $\pm 0.125$  | $\pm 0.094$  |
|                           | 0.031        | 0.642        | 0.273        | 0.273        | 0.545        |
| <b>STEEGformer-s (l)</b>  | $\pm 0.074$  | $\pm 0.087$  | $\pm 0.055$  | $\pm 0.055$  | $\pm 0.063$  |
|                           | 0.377        | 0.780        | 0.533        | 0.533        | 0.754        |
| <b>STEEGformer-b (f)</b>  | $\pm 0.151$  | $\pm 0.085$  | $\pm 0.114$  | $\pm 0.114$  | $\pm 0.089$  |
|                           | 0.043        | 0.660        | 0.282        | 0.282        | 0.561        |
| <b>STEEGformer-b (l)</b>  | $\pm 0.089$  | $\pm 0.095$  | $\pm 0.066$  | $\pm 0.066$  | $\pm 0.086$  |
|                           | 0.434        | 0.800        | 0.575        | 0.575        | 0.788        |
| <b>STEEGformer-l (f)</b>  | $\pm 0.197$  | $\pm 0.103$  | $\pm 0.148$  | $\pm 0.148$  | $\pm 0.119$  |
|                           | 0.074        | 0.672        | 0.306        | 0.305        | 0.577        |
| <b>STEEGformer-l (l)</b>  | $\pm 0.104$  | $\pm 0.105$  | $\pm 0.078$  | $\pm 0.078$  | $\pm 0.103$  |

Table 10: Per-Subject Leave-One-Out Zero-Shot Performance.

| SubjectMetric |          | DeepConvnet | EEGNet       | Conformer    | CTNet        | BIOT (f) | BIOT (l) | BENDR (f) | BENDR (l) | CBraMod (f)  | CBraMod (l) | EEGPT (f) | EEGPT (l) | LaBraM (f) | LaBraM (l) | STEEGformer-s (f) | STEEGformer-s (l) | STEEGformer-b (f) | STEEGformer-b (l) | STEEGformer-l (f) | STEEGformer-l (l) |
|---------------|----------|-------------|--------------|--------------|--------------|----------|----------|-----------|-----------|--------------|-------------|-----------|-----------|------------|------------|-------------------|-------------------|-------------------|-------------------|-------------------|-------------------|
| A1            | $\kappa$ | 0.384       | 0.486        | 0.157        | 0.565        | 0.194    | 0.148    | 0.185     | 0.097     | 0.292        | 0.097       | 0.069     | 0.509     | 0.171      | 0.005      | 0.556             | 0.231             | <b>0.606</b>      | 0.282             | 0.681             | 0.310             |
|               | AUC      | 0.833       | 0.858        | 0.653        | <b>0.898</b> | 0.660    | 0.648    | 0.657     | 0.588     | 0.747        | 0.631       | 0.586     | 0.843     | 0.643      | 0.568      | 0.841             | 0.764             | 0.875             | 0.785             | 0.914             | 0.833             |
|               | BAcc     | 0.538       | 0.615        | 0.368        | 0.674        | 0.396    | 0.361    | 0.389     | 0.323     | 0.469        | 0.323       | 0.302     | 0.632     | 0.378      | 0.253      | 0.667             | 0.424             | <b>0.705</b>      | 0.462             | 0.760             | 0.483             |
|               | Acc.1    | 0.538       | 0.615        | 0.368        | 0.674        | 0.396    | 0.361    | 0.389     | 0.323     | 0.469        | 0.323       | 0.302     | 0.632     | 0.378      | 0.253      | 0.667             | 0.424             | <b>0.705</b>      | 0.462             | 0.760             | 0.483             |
|               | Acc.2    | 0.833       | 0.851        | 0.656        | <b>0.889</b> | 0.642    | 0.632    | 0.628     | 0.594     | 0.712        | 0.608       | 0.615     | 0.854     | 0.646      | 0.545      | 0.851             | 0.715             | 0.872             | 0.788             | 0.941             | 0.844             |
| A2            | $\kappa$ | 0.292       | 0.324        | 0.213        | <b>0.315</b> | 0.019    | 0.074    | 0.162     | 0.046     | 0.245        | 0.102       | 0.051     | 0.157     | 0.019      | -0.009     | 0.204             | 0.023             | 0.218             | 0.000             | 0.194             | -0.028            |
|               | AUC      | 0.712       | 0.771        | 0.684        | <b>0.761</b> | 0.530    | 0.543    | 0.628     | 0.545     | 0.702        | 0.566       | 0.545     | 0.679     | 0.513      | 0.488      | 0.638             | 0.536             | 0.646             | 0.532             | 0.648             | 0.505             |
|               | BAcc     | 0.469       | 0.493        | 0.410        | <b>0.486</b> | 0.264    | 0.306    | 0.372     | 0.285     | 0.434        | 0.326       | 0.288     | 0.368     | 0.264      | 0.243      | 0.403             | 0.267             | 0.413             | 0.250             | 0.396             | 0.229             |
|               | Acc.1    | 0.469       | 0.493        | 0.410        | <b>0.486</b> | 0.264    | 0.306    | 0.372     | 0.285     | 0.434        | 0.326       | 0.288     | 0.368     | 0.264      | 0.243      | 0.403             | 0.267             | 0.413             | 0.250             | 0.396             | 0.229             |
|               | Acc.2    | 0.681       | 0.733        | <b>0.701</b> | 0.688        | 0.517    | 0.552    | 0.608     | 0.573     | <b>0.701</b> | 0.580       | 0.542     | 0.691     | 0.503      | 0.497      | 0.628             | 0.531             | 0.653             | 0.514             | 0.688             | 0.490             |
| A3            | $\kappa$ | 0.569       | 0.657        | 0.431        | 0.708        | 0.176    | 0.208    | 0.296     | 0.051     | 0.380        | 0.162       | 0.171     | 0.523     | 0.106      | 0.130      | 0.639             | 0.000             | 0.519             | 0.014             | <b>0.681</b>      | 0.005             |
|               | AUC      | 0.946       | <b>0.960</b> | 0.806        | 0.977        | 0.636    | 0.664    | 0.721     | 0.570     | 0.827        | 0.626       | 0.647     | 0.876     | 0.591      | 0.592      | 0.881             | 0.723             | 0.901             | 0.729             | 0.899             | 0.734             |
|               | BAcc     | 0.677       | 0.743        | 0.573        | 0.781        | 0.382    | 0.406    | 0.472     | 0.288     | 0.535        | 0.372       | 0.378     | 0.642     | 0.330      | 0.347      | 0.729             | 0.250             | 0.639             | 0.260             | <b>0.760</b>      | 0.253             |
|               | Acc.1    | 0.677       | 0.743        | 0.573        | 0.781        | 0.382    | 0.406    | 0.472     | 0.288     | 0.535        | 0.372       | 0.378     | 0.642     | 0.330      | 0.344      | 0.729             | 0.250             | 0.639             | 0.260             | <b>0.760</b>      | 0.253             |
|               | Acc.2    | 0.899       | 0.924        | 0.767        | 0.924        | 0.656    | 0.660    | 0.653     | 0.545     | 0.743        | 0.656       | 0.649     | 0.878     | 0.608      | 0.583      | 0.878             | 0.566             | 0.851             | 0.587             | <b>0.920</b>      | 0.594             |
| A4            | $\kappa$ | 0.347       | 0.398        | 0.273        | <b>0.370</b> | 0.069    | 0.028    | 0.227     | 0.097     | 0.241        | 0.051       | 0.134     | 0.208     | 0.093      | 0.088      | 0.144             | 0.000             | 0.167             | 0.083             | 0.208             | 0.116             |
|               | AUC      | 0.790       | <b>0.827</b> | 0.714        | 0.835        | 0.552    | 0.542    | 0.692     | 0.573     | 0.688        | 0.572       | 0.654     | 0.734     | 0.570      | 0.594      | 0.653             | 0.568             | 0.704             | 0.629             | 0.674             | 0.665             |
|               | BAcc     | 0.510       | 0.549        | 0.455        | <b>0.528</b> | 0.302    | 0.271    | 0.420     | 0.323     | 0.431        | 0.288       | 0.351     | 0.406     | 0.319      | 0.316      | 0.358             | 0.250             | 0.375             | 0.312             | 0.406             | 0.337             |
|               | Acc.1    | 0.510       | 0.549        | 0.455        | <b>0.528</b> | 0.302    | 0.271    | 0.420     | 0.326     | 0.431        | 0.288       | 0.351     | 0.406     | 0.319      | 0.312      | 0.358             | 0.250             | 0.375             | 0.312             | 0.403             | 0.337             |
|               | Acc.2    | 0.795       | <b>0.792</b> | 0.715        | 0.788        | 0.559    | 0.514    | 0.691     | 0.608     | 0.660        | 0.562       | 0.608     | 0.653     | 0.562      | 0.625      | 0.646             | 0.507             | 0.688             | 0.545             | 0.688             | 0.590             |
| A5            | $\kappa$ | 0.333       | <b>0.417</b> | 0.398        | 0.380        | 0.014    | 0.009    | 0.292     | 0.028     | 0.495        | 0.125       | 0.083     | 0.181     | 0.046      | 0.019      | 0.236             | 0.000             | 0.245             | 0.000             | 0.269             | 0.028             |
|               | AUC      | 0.873       | <b>0.886</b> | 0.816        | 0.890        | 0.511    | 0.522    | 0.740     | 0.508     | 0.873        | 0.674       | 0.592     | 0.717     | 0.553      | 0.499      | 0.709             | 0.563             | 0.716             | 0.558             | 0.776             | 0.598             |
|               | BAcc     | 0.500       | <b>0.563</b> | 0.549        | 0.535        | 0.260    | 0.257    | 0.469     | 0.271     | 0.622        | 0.344       | 0.312     | 0.385     | 0.285      | 0.264      | 0.427             | 0.250             | 0.434             | 0.250             | 0.451             | 0.271             |
|               | Acc.1    | 0.500       | <b>0.562</b> | 0.549        | 0.535        | 0.260    | 0.257    | 0.469     | 0.271     | 0.622        | 0.344       | 0.312     | 0.385     | 0.285      | 0.264      | 0.427             | 0.250             | 0.434             | 0.250             | 0.451             | 0.271             |

Continued on next page

| Subject | Metric   | DeepConvnet | EEGNet | Conformer | CTNet | BIOT (f) | BIOT (l) | BENDR (f) | BENDR (l) | CBraMod (f) | CBraMod (l) | EEGPT (f) | EEGPT (l) | LaBraM (f) | LaBraM (l) | STEEGformer-s (f) | STEEGformer-s (l) | STEEGformer-b (f) | STEEGformer-b (l) | STEEGformer-l (f) | STEEGformer-l (l) |      |
|---------|----------|-------------|--------|-----------|-------|----------|----------|-----------|-----------|-------------|-------------|-----------|-----------|------------|------------|-------------------|-------------------|-------------------|-------------------|-------------------|-------------------|------|
|         |          |             |        |           |       |          |          |           |           |             |             |           |           |            |            |                   |                   |                   |                   |                   |                   |      |
| A6      | Acc_2    | 0.705       | 0.795  | 0.733     | 0.715 | 0.500    | 0.479    | 0.729     | 0.500     | 0.788       | 0.597       | 0.583     | 0.580     | 0.576      | 0.486      | 0.625             | 0.500             | 0.649             | 0.500             | 0.660             | 0.500             | 1050 |
|         | $\kappa$ | 0.296       | 0.278  | 0.287     | 0.310 | -0.032   | 0.014    | 0.181     | 0.042     | 0.347       | 0.074       | 0.144     | 0.282     | 0.102      | -0.014     | 0.218             | -0.037            | 0.273             | -0.014            | 0.222             | -0.046            | 1051 |
|         | AUC      | 0.771       | 0.774  | 0.696     | 0.791 | 0.513    | 0.538    | 0.637     | 0.542     | 0.760       | 0.574       | 0.611     | 0.743     | 0.596      | 0.504      | 0.682             | 0.533             | 0.719             | 0.527             | 0.676             | 0.518             | 1052 |
|         | BAcc     | 0.472       | 0.458  | 0.465     | 0.483 | 0.226    | 0.260    | 0.385     | 0.281     | 0.510       | 0.306       | 0.358     | 0.462     | 0.326      | 0.240      | 0.413             | 0.222             | 0.455             | 0.240             | 0.417             | 0.215             | 1053 |
|         | Acc_1    | 0.472       | 0.458  | 0.465     | 0.483 | 0.226    | 0.260    | 0.382     | 0.278     | 0.510       | 0.306       | 0.358     | 0.462     | 0.326      | 0.243      | 0.413             | 0.222             | 0.455             | 0.240             | 0.417             | 0.215             | 1054 |
|         | Acc_2    | 0.781       | 0.736  | 0.726     | 0.757 | 0.517    | 0.500    | 0.632     | 0.524     | 0.774       | 0.576       | 0.611     | 0.715     | 0.587      | 0.507      | 0.667             | 0.542             | 0.681             | 0.545             | 0.611             | 0.524             | 1055 |
| A7      | $\kappa$ | 0.565       | 0.634  | 0.426     | 0.644 | -0.019   | 0.042    | 0.306     | 0.097     | 0.542       | 0.167       | 0.148     | 0.282     | 0.088      | 0.042      | 0.315             | 0.037             | 0.380             | 0.014             | 0.509             | 0.144             | 1056 |
|         | AUC      | 0.887       | 0.920  | 0.825     | 0.937 | 0.506    | 0.530    | 0.732     | 0.568     | 0.861       | 0.711       | 0.642     | 0.776     | 0.565      | 0.572      | 0.754             | 0.662             | 0.788             | 0.718             | 0.850             | 0.730             | 1057 |
|         | BAcc     | 0.674       | 0.726  | 0.569     | 0.733 | 0.236    | 0.281    | 0.479     | 0.323     | 0.656       | 0.375       | 0.361     | 0.462     | 0.316      | 0.281      | 0.486             | 0.278             | 0.535             | 0.260             | 0.632             | 0.358             | 1058 |
|         | Acc_1    | 0.674       | 0.726  | 0.569     | 0.733 | 0.236    | 0.281    | 0.479     | 0.323     | 0.656       | 0.375       | 0.361     | 0.462     | 0.316      | 0.281      | 0.486             | 0.278             | 0.535             | 0.260             | 0.632             | 0.358             | 1059 |
|         | Acc_2    | 0.840       | 0.917  | 0.809     | 0.938 | 0.521    | 0.510    | 0.726     | 0.556     | 0.875       | 0.684       | 0.635     | 0.733     | 0.611      | 0.528      | 0.774             | 0.524             | 0.760             | 0.573             | 0.847             | 0.552             | 1060 |
|         | $\kappa$ | 0.546       | 0.551  | 0.343     | 0.671 | 0.245    | 0.185    | 0.181     | 0.083     | 0.352       | 0.088       | 0.148     | 0.500     | -0.023     | 0.051      | 0.514             | 0.023             | 0.560             | 0.000             | 0.616             | 0.111             | 1061 |
| A8      | AUC      | 0.907       | 0.913  | 0.768     | 0.939 | 0.667    | 0.710    | 0.674     | 0.572     | 0.764       | 0.586       | 0.633     | 0.849     | 0.514      | 0.548      | 0.835             | 0.686             | 0.876             | 0.714             | 0.912             | 0.703             | 1062 |
|         | BAcc     | 0.660       | 0.663  | 0.507     | 0.753 | 0.434    | 0.389    | 0.385     | 0.312     | 0.514       | 0.316       | 0.361     | 0.625     | 0.233      | 0.288      | 0.635             | 0.267             | 0.670             | 0.250             | 0.712             | 0.333             | 1063 |
|         | Acc_1    | 0.660       | 0.663  | 0.507     | 0.753 | 0.434    | 0.389    | 0.385     | 0.312     | 0.514       | 0.312       | 0.361     | 0.625     | 0.233      | 0.288      | 0.635             | 0.267             | 0.670             | 0.250             | 0.712             | 0.330             | 1064 |
|         | Acc_2    | 0.861       | 0.889  | 0.771     | 0.910 | 0.674    | 0.646    | 0.635     | 0.580     | 0.757       | 0.569       | 0.622     | 0.847     | 0.483      | 0.528      | 0.826             | 0.514             | 0.882             | 0.500             | 0.892             | 0.500             | 1065 |
|         | $\kappa$ | 0.426       | 0.343  | 0.241     | 0.440 | 0.088    | 0.069    | 0.120     | 0.046     | 0.333       | 0.157       | 0.213     | 0.329     | 0.130      | 0.046      | 0.319             | 0.000             | 0.426             | 0.009             | 0.523             | 0.028             | 1066 |
|         | AUC      | 0.825       | 0.815  | 0.683     | 0.855 | 0.626    | 0.674    | 0.603     | 0.527     | 0.750       | 0.671       | 0.650     | 0.748     | 0.608      | 0.652      | 0.718             | 0.740             | 0.797             | 0.752             | 0.851             | 0.764             | 1067 |
| A9      | BAcc     | 0.569       | 0.507  | 0.431     | 0.580 | 0.316    | 0.302    | 0.340     | 0.285     | 0.500       | 0.368       | 0.410     | 0.497     | 0.347      | 0.285      | 0.490             | 0.250             | 0.569             | 0.257             | 0.642             | 0.271             | 1068 |
|         | Acc_1    | 0.569       | 0.507  | 0.431     | 0.580 | 0.316    | 0.302    | 0.340     | 0.285     | 0.500       | 0.368       | 0.410     | 0.497     | 0.347      | 0.285      | 0.490             | 0.250             | 0.569             | 0.257             | 0.642             | 0.271             | 1069 |
|         | Acc_2    | 0.837       | 0.785  | 0.698     | 0.858 | 0.601    | 0.590    | 0.611     | 0.517     | 0.743       | 0.628       | 0.660     | 0.757     | 0.608      | 0.514      | 0.719             | 0.507             | 0.753             | 0.500             | 0.847             | 0.601             | 1070 |
|         |          |             |        |           |       |          |          |           |           |             |             |           |           |            |            |                   |                   |                   |                   |                   |                   | 1071 |
|         |          |             |        |           |       |          |          |           |           |             |             |           |           |            |            |                   |                   |                   |                   |                   |                   | 1072 |
|         |          |             |        |           |       |          |          |           |           |             |             |           |           |            |            |                   |                   |                   |                   |                   |                   | 1073 |
|         |          |             |        |           |       |          |          |           |           |             |             |           |           |            |            |                   |                   |                   |                   |                   |                   | 1074 |
|         |          |             |        |           |       |          |          |           |           |             |             |           |           |            |            |                   |                   |                   |                   |                   |                   | 1075 |
|         |          |             |        |           |       |          |          |           |           |             |             |           |           |            |            |                   |                   |                   |                   |                   |                   | 1076 |
|         |          |             |        |           |       |          |          |           |           |             |             |           |           |            |            |                   |                   |                   |                   |                   |                   | 1077 |
|         |          |             |        |           |       |          |          |           |           |             |             |           |           |            |            |                   |                   |                   |                   |                   |                   | 1078 |
|         |          |             |        |           |       |          |          |           |           |             |             |           |           |            |            |                   |                   |                   |                   |                   |                   | 1079 |
|         |          |             |        |           |       |          |          |           |           |             |             |           |           |            |            |                   |                   |                   |                   |                   |                   | 1080 |
|         |          |             |        |           |       |          |          |           |           |             |             |           |           |            |            |                   |                   |                   |                   |                   |                   | 1081 |
|         |          |             |        |           |       |          |          |           |           |             |             |           |           |            |            |                   |                   |                   |                   |                   |                   | 1082 |

## B.3.2 LEAVE-ONE-OUT FINE-TUNING RESULTS

Table 11: Average Leave-One-Out Fine-Tuned Performance Across All Subjects.

| Model (Training strategy) | $\kappa$     | AUC          | BAcc         | Acc.1        | Acc.2        |
|---------------------------|--------------|--------------|--------------|--------------|--------------|
|                           | 0.665        | 0.920        | 0.748        | 0.748        | 0.913        |
| <b>DeepConvnet</b>        | $\pm 0.118$  | $\pm 0.049$  | $\pm 0.089$  | $\pm 0.089$  | $\pm 0.054$  |
|                           | 0.681        | 0.929        | 0.760        | 0.760        | 0.920        |
| <b>EEGNet</b>             | $\pm 0.113$  | $\pm 0.043$  | $\pm 0.085$  | $\pm 0.085$  | $\pm 0.049$  |
|                           | 0.501        | 0.846        | 0.626        | 0.626        | 0.839        |
| <b>Conformer</b>          | $\pm 0.091$  | $\pm 0.052$  | $\pm 0.068$  | $\pm 0.068$  | $\pm 0.042$  |
|                           | <b>0.725</b> | 0.947        | <b>0.794</b> | <b>0.794</b> | 0.938        |
| <b>CTNet</b>              | $\pm 0.136$  | $\pm 0.040$  | $\pm 0.102$  | $\pm 0.102$  | $\pm 0.041$  |
|                           | 0.254        | 0.689        | 0.440        | 0.440        | 0.699        |
| <b>BIOT (f)</b>           | $\pm 0.165$  | $\pm 0.098$  | $\pm 0.124$  | $\pm 0.124$  | $\pm 0.104$  |
|                           | 0.306        | 0.736        | 0.480        | 0.480        | 0.735        |
| <b>BIOT (l)</b>           | $\pm 0.149$  | $\pm 0.100$  | $\pm 0.111$  | $\pm 0.111$  | $\pm 0.098$  |
|                           | 0.347        | 0.769        | 0.510        | 0.510        | 0.752        |
| <b>BENDR (f)</b>          | $\pm 0.119$  | $\pm 0.064$  | $\pm 0.089$  | $\pm 0.089$  | $\pm 0.063$  |
|                           | 0.101        | 0.589        | 0.326        | 0.326        | 0.595        |
| <b>BENDR (l)</b>          | $\pm 0.032$  | $\pm 0.020$  | $\pm 0.024$  | $\pm 0.024$  | $\pm 0.026$  |
|                           | 0.528        | 0.871        | 0.646        | 0.646        | 0.868        |
| <b>CBraMod (f)</b>        | $\pm 0.105$  | $\pm 0.052$  | $\pm 0.079$  | $\pm 0.079$  | $\pm 0.049$  |
|                           | 0.131        | 0.634        | 0.348        | 0.348        | 0.623        |
| <b>CBraMod (l)</b>        | $\pm 0.047$  | $\pm 0.048$  | $\pm 0.035$  | $\pm 0.035$  | $\pm 0.042$  |
|                           | 0.245        | 0.698        | 0.434        | 0.434        | 0.706        |
| <b>EEGPT (f)</b>          | $\pm 0.095$  | $\pm 0.054$  | $\pm 0.071$  | $\pm 0.071$  | $\pm 0.053$  |
|                           | 0.428        | 0.815        | 0.571        | 0.571        | 0.816        |
| <b>EEGPT (l)</b>          | $\pm 0.121$  | $\pm 0.067$  | $\pm 0.091$  | $\pm 0.091$  | $\pm 0.069$  |
|                           | 0.164        | 0.617        | 0.373        | 0.373        | 0.625        |
| <b>LaBraM (f)</b>         | $\pm 0.075$  | $\pm 0.061$  | $\pm 0.056$  | $\pm 0.056$  | $\pm 0.075$  |
|                           | 0.085        | 0.581        | 0.314        | 0.313        | 0.583        |
| <b>LaBraM (l)</b>         | $\pm 0.071$  | $\pm 0.061$  | $\pm 0.053$  | $\pm 0.053$  | $\pm 0.063$  |
|                           | 0.634        | 0.896        | 0.725        | 0.725        | 0.897        |
| <b>STEEGformer-s (f)</b>  | $\pm 0.130$  | $\pm 0.060$  | $\pm 0.098$  | $\pm 0.098$  | $\pm 0.057$  |
|                           | 0.186        | 0.713        | 0.390        | 0.390        | 0.651        |
| <b>STEEGformer-s (l)</b>  | $\pm 0.117$  | $\pm 0.092$  | $\pm 0.088$  | $\pm 0.088$  | $\pm 0.115$  |
|                           | 0.707        | 0.929        | 0.780        | 0.780        | 0.928        |
| <b>STEEGformer-b (f)</b>  | $\pm 0.119$  | $\pm 0.049$  | $\pm 0.089$  | $\pm 0.089$  | $\pm 0.051$  |
|                           | 0.218        | 0.714        | 0.414        | 0.413        | 0.681        |
| <b>STEEGformer-b (l)</b>  | $\pm 0.102$  | $\pm 0.089$  | $\pm 0.077$  | $\pm 0.077$  | $\pm 0.111$  |
|                           | 0.744        | <b>0.937</b> | 0.808        | 0.808        | <b>0.931</b> |
| <b>STEEGformer-l (f)</b>  | $\pm 0.143$  | $\pm 0.057$  | $\pm 0.108$  | $\pm 0.108$  | $\pm 0.064$  |
|                           | 0.161        | 0.713        | 0.371        | 0.371        | 0.677        |
| <b>STEEGformer-l (l)</b>  | $\pm 0.117$  | $\pm 0.099$  | $\pm 0.088$  | $\pm 0.088$  | $\pm 0.127$  |

Table 12: Per-Subject Leave-One-Out Fine-Tuned Performance.

| Subject | Metric   | DeepConvnet  | EEGNet       | Conformer | CTNet        | BIOT (f) | BIOT (l) | BENDR (f) | BENDR (l) | CBraMod (f)  | CBraMod (l) | EEGPT (f) | EEGPT (l) | LaBraM (f) | LaBraM (l) | STEEGformer-s (f) | STEEGformer-s (l) | STEEGformer-b (f) | STEEGformer-b (l) | STEEGformer-l (f) | STEEGformer-l (l) |
|---------|----------|--------------|--------------|-----------|--------------|----------|----------|-----------|-----------|--------------|-------------|-----------|-----------|------------|------------|-------------------|-------------------|-------------------|-------------------|-------------------|-------------------|
| A1      | $\kappa$ | 0.745        | 0.773        | 0.431     | <b>0.792</b> | 0.426    | 0.491    | 0.204     | 0.167     | 0.486        | 0.088       | 0.245     | 0.579     | 0.245      | 0.102      | 0.736             | 0.347             | 0.778             | 0.315             | 0.806             | 0.343             |
|         | AUC      | 0.955        | 0.968        | 0.813     | 0.972        | 0.795    | 0.871    | 0.711     | 0.632     | 0.854        | 0.627       | 0.709     | 0.896     | 0.706      | 0.611      | 0.937             | 0.844             | 0.966             | 0.827             | <b>0.971</b>      | 0.850             |
|         | BAcc     | 0.809        | 0.830        | 0.573     | <b>0.844</b> | 0.569    | 0.618    | 0.403     | 0.375     | 0.615        | 0.316       | 0.434     | 0.684     | 0.434      | 0.326      | 0.802             | 0.510             | 0.833             | 0.486             | 0.854             | 0.507             |
|         | Acc.1    | 0.809        | 0.830        | 0.573     | <b>0.844</b> | 0.569    | 0.618    | 0.403     | 0.375     | 0.615        | 0.316       | 0.434     | 0.684     | 0.434      | 0.326      | 0.802             | 0.510             | 0.833             | 0.486             | 0.854             | 0.510             |
|         | Acc.2    | 0.972        | 0.972        | 0.819     | <b>0.979</b> | 0.840    | 0.913    | 0.708     | 0.646     | 0.826        | 0.628       | 0.712     | 0.920     | 0.736      | 0.632      | 0.944             | 0.885             | <b>0.979</b>      | 0.868             | 0.983             | 0.931             |
| A2      | $\kappa$ | 0.440        | 0.472        | 0.366     | <b>0.468</b> | 0.000    | 0.097    | 0.204     | 0.093     | 0.366        | 0.120       | 0.102     | 0.255     | 0.106      | -0.009     | 0.394             | 0.065             | <b>0.468</b>      | 0.111             | 0.463             | 0.046             |
|         | AUC      | 0.816        | <b>0.851</b> | 0.790     | 0.865        | 0.545    | 0.602    | 0.697     | 0.596     | 0.779        | 0.577       | 0.614     | 0.696     | 0.547      | 0.490      | 0.780             | 0.576             | 0.822             | 0.581             | 0.814             | 0.552             |
|         | BAcc     | 0.580        | 0.604        | 0.524     | <b>0.601</b> | 0.250    | 0.323    | 0.403     | 0.319     | 0.524        | 0.340       | 0.326     | 0.441     | 0.330      | 0.243      | 0.545             | 0.299             | <b>0.601</b>      | 0.333             | 0.597             | 0.285             |
|         | Acc.1    | 0.580        | 0.604        | 0.524     | <b>0.601</b> | 0.250    | 0.323    | 0.403     | 0.319     | 0.524        | 0.340       | 0.326     | 0.441     | 0.330      | 0.243      | 0.545             | 0.302             | <b>0.601</b>      | 0.330             | 0.597             | 0.285             |
|         | Acc.2    | 0.806        | <b>0.833</b> | 0.774     | 0.847        | 0.573    | 0.580    | 0.681     | 0.576     | 0.781        | 0.583       | 0.622     | 0.715     | 0.524      | 0.503      | 0.774             | 0.549             | 0.819             | 0.545             | 0.799             | 0.514             |
| A3      | $\kappa$ | 0.884        | 0.856        | 0.644     | <b>0.935</b> | 0.481    | 0.407    | 0.426     | 0.065     | 0.648        | 0.111       | 0.329     | 0.579     | 0.204      | 0.106      | 0.843             | 0.153             | 0.889             | 0.231             | 0.944             | 0.111             |
|         | AUC      | 0.988        | 0.986        | 0.925     | <b>0.996</b> | 0.810    | 0.807    | 0.811     | 0.580     | 0.936        | 0.620       | 0.757     | 0.897     | 0.656      | 0.616      | 0.981             | 0.758             | 0.987             | 0.782             | 0.997             | 0.763             |
|         | BAcc     | 0.913        | 0.892        | 0.733     | <b>0.951</b> | 0.611    | 0.556    | 0.569     | 0.299     | 0.736        | 0.333       | 0.497     | 0.684     | 0.403      | 0.330      | 0.882             | 0.365             | 0.917             | 0.424             | 0.958             | 0.333             |
|         | Acc.1    | 0.913        | 0.892        | 0.733     | <b>0.951</b> | 0.611    | 0.556    | 0.569     | 0.299     | 0.736        | 0.333       | 0.497     | 0.684     | 0.403      | 0.330      | 0.882             | 0.365             | 0.917             | 0.424             | 0.958             | 0.333             |
|         | Acc.2    | <b>0.990</b> | 0.972        | 0.896     | 0.986        | 0.799    | 0.792    | 0.795     | 0.608     | 0.931        | 0.632       | 0.771     | 0.903     | 0.649      | 0.608      | 0.972             | 0.646             | 0.983             | 0.715             | 1.000             | 0.632             |
| A4      | $\kappa$ | 0.644        | <b>0.685</b> | 0.514     | 0.759        | 0.199    | 0.218    | 0.431     | 0.083     | 0.495        | 0.088       | 0.347     | 0.435     | 0.153      | 0.106      | 0.514             | 0.074             | 0.676             | 0.190             | 0.593             | 0.171             |
|         | AUC      | 0.912        | 0.928        | 0.844     | 0.957        | 0.667    | 0.665    | 0.813     | 0.596     | 0.853        | 0.586       | 0.754     | 0.817     | 0.601      | 0.590      | 0.846             | 0.675             | <b>0.932</b>      | 0.682             | 0.899             | 0.707             |
|         | BAcc     | 0.733        | <b>0.764</b> | 0.635     | 0.819        | 0.399    | 0.413    | 0.573     | 0.312     | 0.622        | 0.316       | 0.510     | 0.576     | 0.365      | 0.330      | 0.635             | 0.306             | 0.757             | 0.392             | 0.694             | 0.378             |
|         | Acc.1    | 0.733        | <b>0.764</b> | 0.635     | 0.819        | 0.399    | 0.413    | 0.573     | 0.312     | 0.622        | 0.316       | 0.510     | 0.576     | 0.365      | 0.326      | 0.635             | 0.302             | 0.757             | 0.392             | 0.694             | 0.382             |
|         | Acc.2    | 0.903        | 0.917        | 0.819     | 0.955        | 0.660    | 0.705    | 0.809     | 0.628     | 0.854        | 0.545       | 0.764     | 0.823     | 0.628      | 0.590      | 0.872             | 0.566             | <b>0.941</b>      | 0.684             | 0.899             | 0.715             |
| A5      | $\kappa$ | 0.648        | 0.667        | 0.611     | 0.620        | 0.037    | 0.144    | 0.560     | 0.065     | 0.676        | 0.181       | 0.162     | 0.245     | 0.120      | 0.046      | 0.630             | 0.074             | <b>0.694</b>      | 0.093             | 0.815             | 0.088             |
|         | AUC      | 0.932        | 0.936        | 0.920     | 0.930        | 0.570    | 0.608    | 0.882     | 0.585     | <b>0.943</b> | 0.656       | 0.652     | 0.738     | 0.585      | 0.531      | 0.908             | 0.612             | 0.930             | 0.621             | 0.959             | 0.636             |
|         | BAcc     | 0.736        | 0.750        | 0.708     | 0.715        | 0.278    | 0.358    | 0.670     | 0.299     | 0.757        | 0.385       | 0.372     | 0.434     | 0.340      | 0.285      | 0.722             | 0.306             | <b>0.771</b>      | 0.319             | 0.861             | 0.316             |
|         | Acc.1    | 0.736        | 0.750        | 0.708     | 0.715        | 0.278    | 0.358    | 0.670     | 0.299     | 0.757        | 0.385       | 0.372     | 0.434     | 0.340      | 0.285      | 0.722             | 0.306             | <b>0.771</b>      | 0.319             | 0.861             | 0.316             |

Continued on next page

|         |          | 1170<br>1171<br>1172<br>1173<br>1174<br>1175<br>1176<br>1177<br>1178<br>1179<br>1180<br>1181<br>1182<br>1183<br>1184<br>1185<br>1186<br>1187<br>1188<br>1189<br>1190<br>1191<br>1192<br>1193<br>1194<br>1195<br>1196<br>1197<br>1198<br>1199<br>1200<br>1201<br>1202 |        |           |       |          |          |           |           |             |             |           |           |            |            |                   |                   |                   |                   |                   |                   |
|---------|----------|----------------------------------------------------------------------------------------------------------------------------------------------------------------------------------------------------------------------------------------------------------------------|--------|-----------|-------|----------|----------|-----------|-----------|-------------|-------------|-----------|-----------|------------|------------|-------------------|-------------------|-------------------|-------------------|-------------------|-------------------|
| Subject | Metric   | DeepConvnet                                                                                                                                                                                                                                                          | EEGNet | Conformer | CTNet | BIOT (f) | BIOT (l) | BENDR (f) | BENDR (l) | CBraMod (f) | CBraMod (l) | EEGPT (f) | EEGPT (l) | LaBraM (f) | LaBraM (l) | STEEGformer-s (f) | STEEGformer-s (l) | STEEGformer-b (f) | STEEGformer-b (l) | STEEGformer-l (f) | STEEGformer-l (l) |
| A6      | Acc_2    | 0.938                                                                                                                                                                                                                                                                | 0.934  | 0.913     | 0.931 | 0.580    | 0.625    | 0.826     | 0.594     | 0.934       | 0.656       | 0.674     | 0.736     | 0.622      | 0.517      | 0.889             | 0.556             | 0.924             | 0.594             | 0.958             | 0.552             |
|         | $\kappa$ | 0.542                                                                                                                                                                                                                                                                | 0.528  | 0.398     | 0.574 | 0.144    | 0.134    | 0.208     | 0.102     | 0.426       | 0.111       | 0.134     | 0.310     | 0.093      | -0.023     | 0.509             | 0.097             | 0.574             | 0.120             | 0.620             | 0.037             |
|         | AUC      | 0.862                                                                                                                                                                                                                                                                | 0.864  | 0.779     | 0.899 | 0.591    | 0.637    | 0.685     | 0.556     | 0.832       | 0.588       | 0.634     | 0.751     | 0.569      | 0.518      | 0.833             | 0.617             | 0.869             | 0.610             | 0.876             | 0.578             |
|         | BAcc     | 0.656                                                                                                                                                                                                                                                                | 0.646  | 0.549     | 0.681 | 0.358    | 0.351    | 0.406     | 0.326     | 0.569       | 0.333       | 0.351     | 0.483     | 0.319      | 0.233      | 0.632             | 0.323             | 0.681             | 0.340             | 0.715             | 0.278             |
|         | Acc_1    | 0.656                                                                                                                                                                                                                                                                | 0.646  | 0.549     | 0.681 | 0.358    | 0.351    | 0.406     | 0.330     | 0.569       | 0.333       | 0.351     | 0.483     | 0.319      | 0.233      | 0.632             | 0.323             | 0.681             | 0.340             | 0.715             | 0.278             |
| A7      | Acc_2    | 0.854                                                                                                                                                                                                                                                                | 0.840  | 0.799     | 0.896 | 0.580    | 0.656    | 0.639     | 0.562     | 0.844       | 0.597       | 0.677     | 0.743     | 0.569      | 0.517      | 0.844             | 0.594             | 0.861             | 0.597             | 0.851             | 0.566             |
|         | $\kappa$ | 0.685                                                                                                                                                                                                                                                                | 0.764  | 0.574     | 0.829 | 0.231    | 0.370    | 0.435     | 0.130     | 0.671       | 0.241       | 0.250     | 0.477     | 0.250      | 0.088      | 0.685             | 0.213             | 0.815             | 0.199             | 0.852             | 0.097             |
|         | AUC      | 0.943                                                                                                                                                                                                                                                                | 0.957  | 0.891     | 0.989 | 0.683    | 0.816    | 0.825     | 0.576     | 0.929       | 0.733       | 0.702     | 0.846     | 0.672      | 0.577      | 0.934             | 0.765             | 0.973             | 0.754             | 0.984             | 0.782             |
|         | BAcc     | 0.764                                                                                                                                                                                                                                                                | 0.823  | 0.681     | 0.872 | 0.424    | 0.528    | 0.576     | 0.347     | 0.753       | 0.431       | 0.438     | 0.608     | 0.438      | 0.316      | 0.764             | 0.410             | 0.861             | 0.399             | 0.889             | 0.323             |
|         | Acc_1    | 0.764                                                                                                                                                                                                                                                                | 0.823  | 0.681     | 0.872 | 0.424    | 0.528    | 0.576     | 0.347     | 0.753       | 0.431       | 0.438     | 0.608     | 0.438      | 0.316      | 0.764             | 0.410             | 0.861             | 0.399             | 0.889             | 0.323             |
| A8      | Acc_2    | 0.920                                                                                                                                                                                                                                                                | 0.955  | 0.854     | 0.948 | 0.660    | 0.767    | 0.816     | 0.580     | 0.920       | 0.684       | 0.715     | 0.812     | 0.722      | 0.559      | 0.924             | 0.556             | 0.965             | 0.562             | 0.965             | 0.722             |
|         | $\kappa$ | 0.727                                                                                                                                                                                                                                                                | 0.718  | 0.514     | 0.801 | 0.421    | 0.486    | 0.329     | 0.130     | 0.509       | 0.111       | 0.236     | 0.468     | 0.042      | 0.116      | 0.713             | 0.264             | 0.745             | 0.278             | 0.796             | 0.171             |
|         | AUC      | 0.951                                                                                                                                                                                                                                                                | 0.951  | 0.853     | 0.965 | 0.797    | 0.831    | 0.766     | 0.601     | 0.876       | 0.630       | 0.685     | 0.837     | 0.531      | 0.588      | 0.926             | 0.740             | 0.941             | 0.744             | 0.967             | 0.728             |
|         | BAcc     | 0.795                                                                                                                                                                                                                                                                | 0.788  | 0.635     | 0.851 | 0.566    | 0.615    | 0.497     | 0.347     | 0.632       | 0.333       | 0.427     | 0.601     | 0.281      | 0.337      | 0.785             | 0.448             | 0.809             | 0.458             | 0.847             | 0.378             |
|         | Acc_1    | 0.795                                                                                                                                                                                                                                                                | 0.788  | 0.635     | 0.851 | 0.566    | 0.615    | 0.497     | 0.347     | 0.632       | 0.333       | 0.427     | 0.601     | 0.281      | 0.337      | 0.785             | 0.448             | 0.809             | 0.455             | 0.847             | 0.375             |
| A9      | Acc_2    | 0.938                                                                                                                                                                                                                                                                | 0.941  | 0.847     | 0.962 | 0.816    | 0.809    | 0.767     | 0.583     | 0.868       | 0.611       | 0.646     | 0.851     | 0.510      | 0.611      | 0.934             | 0.708             | 0.944             | 0.719             | 0.951             | 0.649             |
|         | $\kappa$ | 0.667                                                                                                                                                                                                                                                                | 0.662  | 0.458     | 0.745 | 0.343    | 0.407    | 0.324     | 0.079     | 0.472       | 0.125       | 0.398     | 0.505     | 0.264      | 0.231      | 0.681             | 0.389             | 0.722             | 0.426             | 0.810             | 0.384             |
|         | AUC      | 0.919                                                                                                                                                                                                                                                                | 0.916  | 0.802     | 0.948 | 0.747    | 0.785    | 0.733     | 0.583     | 0.841       | 0.688       | 0.776     | 0.852     | 0.686      | 0.709      | 0.923             | 0.833             | 0.939             | 0.831             | 0.965             | 0.824             |
|         | BAcc     | 0.750                                                                                                                                                                                                                                                                | 0.747  | 0.594     | 0.809 | 0.507    | 0.556    | 0.493     | 0.309     | 0.604       | 0.344       | 0.549     | 0.628     | 0.448      | 0.424      | 0.760             | 0.542             | 0.792             | 0.569             | 0.858             | 0.538             |
|         | Acc_1    | 0.750                                                                                                                                                                                                                                                                | 0.747  | 0.594     | 0.809 | 0.507    | 0.556    | 0.493     | 0.309     | 0.604       | 0.344       | 0.549     | 0.628     | 0.448      | 0.424      | 0.760             | 0.542             | 0.792             | 0.569             | 0.858             | 0.538             |
|         | Acc_2    | 0.896                                                                                                                                                                                                                                                                | 0.917  | 0.830     | 0.934 | 0.781    | 0.767    | 0.722     | 0.576     | 0.851       | 0.670       | 0.778     | 0.844     | 0.667      | 0.712      | 0.920             | 0.799             | 0.938             | 0.844             | 0.972             | 0.816             |

## B.3.3 GENERALIZATION DROP AFTER FINE-TUNING

Table 13: Average Model Performance Drop

| Model (Strategy)         | $\kappa$     | AUC          | BAcc         | Acc.1        | Acc.2        |
|--------------------------|--------------|--------------|--------------|--------------|--------------|
|                          | 0.256        | 0.098        | 0.192        | 0.192        | 0.125        |
| <b>DeepConvnet</b>       | $\pm 0.048$  | $\pm 0.020$  | $\pm 0.036$  | $\pm 0.036$  | $\pm 0.024$  |
|                          | 0.245        | 0.086        | 0.183        | 0.183        | 0.120        |
| <b>EEGNet</b>            | $\pm 0.034$  | $\pm 0.011$  | $\pm 0.025$  | $\pm 0.025$  | $\pm 0.026$  |
|                          | 0.097        | 0.047        | 0.073        | 0.073        | 0.054        |
| <b>Conformer</b>         | $\pm 0.021$  | $\pm 0.013$  | $\pm 0.016$  | $\pm 0.016$  | $\pm 0.010$  |
|                          | 0.323        | 0.113        | 0.242        | 0.242        | 0.146        |
| <b>CTNet</b>             | $\pm 0.071$  | $\pm 0.019$  | $\pm 0.054$  | $\pm 0.054$  | $\pm 0.023$  |
|                          | 0.089        | 0.050        | 0.067        | 0.067        | 0.064        |
| <b>BIOT (f)</b>          | $\pm 0.050$  | $\pm 0.022$  | $\pm 0.037$  | $\pm 0.037$  | $\pm 0.037$  |
|                          | 0.129        | 0.068        | 0.097        | 0.097        | 0.096        |
| <b>BIOT (l)</b>          | $\pm 0.063$  | $\pm 0.034$  | $\pm 0.047$  | $\pm 0.047$  | $\pm 0.042$  |
|                          | 0.068        | 0.047        | 0.051        | 0.051        | 0.050        |
| <b>BENDR (f)</b>         | $\pm 0.029$  | $\pm 0.014$  | $\pm 0.022$  | $\pm 0.022$  | $\pm 0.012$  |
|                          | 0.007        | <b>0.005</b> | 0.005        | 0.005        | 0.004        |
| <b>BENDR (l)</b>         | $\pm 0.013$  | $\pm 0.007$  | $\pm 0.009$  | $\pm 0.009$  | $\pm 0.009$  |
|                          | 0.103        | 0.054        | 0.077        | 0.077        | 0.055        |
| <b>CBraMod (f)</b>       | $\pm 0.029$  | $\pm 0.011$  | $\pm 0.022$  | $\pm 0.022$  | $\pm 0.011$  |
|                          | 0.043        | 0.043        | 0.032        | 0.033        | 0.047        |
| <b>CBraMod (l)</b>       | $\pm 0.029$  | $\pm 0.013$  | $\pm 0.022$  | $\pm 0.022$  | $\pm 0.020$  |
|                          | 0.031        | 0.018        | 0.023        | 0.023        | 0.024        |
| <b>EEGPT (f)</b>         | $\pm 0.029$  | $\pm 0.017$  | $\pm 0.022$  | $\pm 0.022$  | $\pm 0.015$  |
|                          | 0.267        | 0.146        | 0.200        | 0.200        | 0.161        |
| <b>EEGPT (l)</b>         | $\pm 0.048$  | $\pm 0.038$  | $\pm 0.036$  | $\pm 0.036$  | $\pm 0.033$  |
|                          | <b>0.012</b> | 0.003        | <b>0.009</b> | <b>0.009</b> | <b>0.018</b> |
| <b>LaBraM (f)</b>        | $\pm 0.016$  | $\pm 0.008$  | $\pm 0.012$  | $\pm 0.012$  | $\pm 0.015$  |
|                          | 0.017        | 0.021        | 0.013        | 0.013        | 0.029        |
| <b>LaBraM (l)</b>        | $\pm 0.019$  | $\pm 0.013$  | $\pm 0.015$  | $\pm 0.014$  | $\pm 0.014$  |
|                          | 0.176        | 0.063        | 0.132        | 0.132        | 0.102        |
| <b>STEEGformer-s (f)</b> | $\pm 0.050$  | $\pm 0.009$  | $\pm 0.037$  | $\pm 0.038$  | $\pm 0.021$  |
|                          | 0.094        | 0.021        | 0.070        | 0.070        | 0.079        |
| <b>STEEGformer-s (l)</b> | $\pm 0.042$  | $\pm 0.016$  | $\pm 0.032$  | $\pm 0.032$  | $\pm 0.037$  |
|                          | 0.145        | 0.048        | 0.108        | 0.108        | 0.070        |
| <b>STEEGformer-b (f)</b> | $\pm 0.034$  | $\pm 0.012$  | $\pm 0.025$  | $\pm 0.025$  | $\pm 0.017$  |
|                          | 0.118        | 0.019        | 0.088        | 0.088        | 0.084        |
| <b>STEEGformer-b (l)</b> | $\pm 0.053$  | $\pm 0.015$  | $\pm 0.039$  | $\pm 0.039$  | $\pm 0.048$  |
|                          | 0.146        | 0.044        | 0.109        | 0.109        | 0.070        |
| <b>STEEGformer-l (f)</b> | $\pm 0.035$  | $\pm 0.017$  | $\pm 0.026$  | $\pm 0.026$  | $\pm 0.018$  |
|                          | 0.115        | 0.020        | 0.086        | 0.086        | 0.092        |
| <b>STEEGformer-l (l)</b> | $\pm 0.051$  | $\pm 0.015$  | $\pm 0.038$  | $\pm 0.038$  | $\pm 0.049$  |



Table 14: Per-Subject Average Drop on Seen Subjects (Post-Fine-Tuning).

| Subject | Metric   | DeepConvnet | EEGNet      | Conformer   | CTNet       | BIOT (f)     | BIOT (l)    | BENDR (f)   | BENDR (l)    | CBraMod (f) | CBraMod (l) | EEGPT (f)    | EEGPT (l)   | LaBraM (f)   | LaBraM (l)    | STEEGformer-s (f) | STEEGformer-s (l) | STEEGformer-b (f) | STEEGformer-b (l) | STEEGformer-l (f) | STEEGformer-l (l) |
|---------|----------|-------------|-------------|-------------|-------------|--------------|-------------|-------------|--------------|-------------|-------------|--------------|-------------|--------------|---------------|-------------------|-------------------|-------------------|-------------------|-------------------|-------------------|
| A1      | $\kappa$ | 0.252       | 0.193       | 0.120       | 0.278       | 0.061        | 0.061       | 0.086       | 0.003        | 0.102       | 0.032       | <b>0.006</b> | 0.233       | 0.021        | 0.016         | 0.094             | 0.115             | 0.134             | 0.130             | 0.136             | 0.101             |
|         |          | $\pm 0.082$ | $\pm 0.085$ | $\pm 0.063$ | $\pm 0.077$ | $\pm 0.046$  | $\pm 0.077$ | $\pm 0.049$ | $\pm 0.031$  | $\pm 0.042$ | $\pm 0.036$ | $\pm 0.023$  | $\pm 0.076$ | $\pm 0.048$  | $\pm 0.031$   | $\pm 0.090$       | $\pm 0.119$       | $\pm 0.118$       | $\pm 0.131$       | $\pm 0.110$       | $\pm 0.149$       |
|         | AUC      | 0.085       | 0.066       | 0.057       | 0.105       | 0.037        | 0.011       | 0.050       | -0.006       | 0.056       | 0.027       | -0.001       | 0.103       | -0.002       | <b>-0.002</b> | 0.047             | 0.022             | 0.036             | 0.032             | 0.021             | 0.021             |
|         |          | $\pm 0.027$ | $\pm 0.026$ | $\pm 0.036$ | $\pm 0.036$ | $\pm 0.038$  | $\pm 0.044$ | $\pm 0.024$ | $\pm 0.015$  | $\pm 0.025$ | $\pm 0.015$ | $\pm 0.016$  | $\pm 0.027$ | $\pm 0.024$  | $\pm 0.020$   | $\pm 0.048$       | $\pm 0.027$       | $\pm 0.025$       | $\pm 0.026$       | $\pm 0.020$       | $\pm 0.029$       |
|         | BAcc     | 0.189       | 0.145       | 0.090       | 0.208       | 0.046        | 0.046       | 0.064       | 0.003        | 0.077       | 0.024       | <b>0.004</b> | 0.174       | 0.016        | 0.012         | 0.070             | 0.086             | 0.101             | 0.098             | 0.102             | 0.076             |
|         |          | $\pm 0.062$ | $\pm 0.063$ | $\pm 0.047$ | $\pm 0.058$ | $\pm 0.034$  | $\pm 0.058$ | $\pm 0.037$ | $\pm 0.023$  | $\pm 0.032$ | $\pm 0.027$ | $\pm 0.017$  | $\pm 0.057$ | $\pm 0.036$  | $\pm 0.023$   | $\pm 0.068$       | $\pm 0.089$       | $\pm 0.089$       | $\pm 0.099$       | $\pm 0.082$       | $\pm 0.112$       |
| A2      | $\kappa$ | 0.189       | 0.145       | 0.090       | 0.208       | 0.046        | 0.046       | 0.064       | 0.002        | 0.076       | 0.024       | <b>0.004</b> | 0.174       | 0.016        | 0.013         | 0.070             | 0.086             | 0.101             | 0.097             | 0.102             | 0.075             |
|         |          | $\pm 0.062$ | $\pm 0.063$ | $\pm 0.047$ | $\pm 0.058$ | $\pm 0.034$  | $\pm 0.058$ | $\pm 0.038$ | $\pm 0.023$  | $\pm 0.031$ | $\pm 0.027$ | $\pm 0.017$  | $\pm 0.057$ | $\pm 0.036$  | $\pm 0.022$   | $\pm 0.068$       | $\pm 0.089$       | $\pm 0.089$       | $\pm 0.098$       | $\pm 0.082$       | $\pm 0.113$       |
|         | Acc.1    | 0.125       | 0.117       | 0.078       | 0.136       | 0.045        | 0.027       | 0.050       | -0.001       | 0.053       | 0.043       | 0.010        | 0.126       | 0.018        | <b>0.005</b>  | 0.078             | 0.082             | 0.076             | 0.086             | 0.071             | 0.079             |
|         |          | $\pm 0.087$ | $\pm 0.098$ | $\pm 0.039$ | $\pm 0.058$ | $\pm 0.037$  | $\pm 0.068$ | $\pm 0.022$ | $\pm 0.032$  | $\pm 0.027$ | $\pm 0.026$ | $\pm 0.025$  | $\pm 0.048$ | $\pm 0.025$  | $\pm 0.026$   | $\pm 0.067$       | $\pm 0.118$       | $\pm 0.059$       | $\pm 0.117$       | $\pm 0.060$       | $\pm 0.116$       |
|         | Acc.2    | 0.325       | 0.247       | 0.123       | 0.409       | 0.072        | 0.207       | 0.086       | <b>0.020</b> | 0.127       | 0.067       | 0.086        | 0.367       | 0.004        | 0.020         | 0.168             | 0.122             | 0.186             | 0.097             | 0.159             | 0.171             |
|         |          | $\pm 0.054$ | $\pm 0.064$ | $\pm 0.065$ | $\pm 0.113$ | $\pm 0.083$  | $\pm 0.126$ | $\pm 0.063$ | $\pm 0.028$  | $\pm 0.051$ | $\pm 0.045$ | $\pm 0.065$  | $\pm 0.107$ | $\pm 0.038$  | $\pm 0.036$   | $\pm 0.067$       | $\pm 0.097$       | $\pm 0.092$       | $\pm 0.061$       | $\pm 0.076$       | $\pm 0.117$       |
| A3      | $\kappa$ | 0.147       | 0.082       | 0.070       | 0.154       | 0.047        | 0.088       | 0.061       | -0.000       | 0.065       | 0.059       | 0.045        | 0.206       | <b>0.009</b> | 0.040         | 0.067             | 0.020             | 0.053             | 0.010             | 0.048             | 0.020             |
|         |          | $\pm 0.024$ | $\pm 0.017$ | $\pm 0.027$ | $\pm 0.022$ | $\pm 0.046$  | $\pm 0.069$ | $\pm 0.030$ | $\pm 0.011$  | $\pm 0.027$ | $\pm 0.034$ | $\pm 0.019$  | $\pm 0.048$ | $\pm 0.020$  | $\pm 0.026$   | $\pm 0.027$       | $\pm 0.024$       | $\pm 0.034$       | $\pm 0.016$       | $\pm 0.022$       | $\pm 0.017$       |
|         | BAcc     | 0.243       | 0.185       | 0.092       | 0.307       | 0.054        | 0.155       | 0.064       | <b>0.015</b> | 0.095       | 0.050       | 0.065        | 0.275       | 0.003        | 0.015         | 0.126             | 0.091             | 0.139             | 0.072             | 0.119             | 0.128             |
|         |          | $\pm 0.041$ | $\pm 0.048$ | $\pm 0.049$ | $\pm 0.085$ | $\pm 0.062$  | $\pm 0.094$ | $\pm 0.048$ | $\pm 0.021$  | $\pm 0.039$ | $\pm 0.034$ | $\pm 0.049$  | $\pm 0.080$ | $\pm 0.028$  | $\pm 0.027$   | $\pm 0.050$       | $\pm 0.073$       | $\pm 0.069$       | $\pm 0.046$       | $\pm 0.057$       | $\pm 0.088$       |
|         | Acc.1    | 0.243       | 0.185       | 0.092       | 0.307       | 0.054        | 0.155       | 0.064       | <b>0.014</b> | 0.095       | 0.051       | 0.065        | 0.275       | 0.003        | 0.016         | 0.126             | 0.091             | 0.139             | 0.073             | 0.119             | 0.129             |
|         |          | $\pm 0.041$ | $\pm 0.048$ | $\pm 0.049$ | $\pm 0.085$ | $\pm 0.062$  | $\pm 0.094$ | $\pm 0.048$ | $\pm 0.021$  | $\pm 0.039$ | $\pm 0.034$ | $\pm 0.049$  | $\pm 0.080$ | $\pm 0.028$  | $\pm 0.027$   | $\pm 0.050$       | $\pm 0.073$       | $\pm 0.069$       | $\pm 0.046$       | $\pm 0.057$       | $\pm 0.088$       |
| A3      | $\kappa$ | 0.140       | 0.073       | 0.050       | 0.144       | 0.063        | 0.120       | 0.051       | -0.011       | 0.064       | 0.063       | 0.046        | 0.204       | 0.035        | <b>0.026</b>  | 0.103             | 0.129             | 0.090             | 0.097             | 0.083             | 0.161             |
|         |          | $\pm 0.045$ | $\pm 0.024$ | $\pm 0.025$ | $\pm 0.034$ | $\pm 0.058$  | $\pm 0.081$ | $\pm 0.043$ | $\pm 0.021$  | $\pm 0.036$ | $\pm 0.038$ | $\pm 0.030$  | $\pm 0.059$ | $\pm 0.026$  | $\pm 0.029$   | $\pm 0.040$       | $\pm 0.088$       | $\pm 0.040$       | $\pm 0.057$       | $\pm 0.050$       | $\pm 0.114$       |
|         | BAcc     | 0.204       | 0.228       | 0.113       | 0.274       | <b>0.018</b> | 0.060       | 0.076       | 0.022        | 0.119       | 0.050       | 0.006        | 0.201       | 0.019        | 0.039         | 0.166             | 0.041             | 0.144             | 0.076             | 0.166             | 0.082             |
|         |          | $\pm 0.080$ | $\pm 0.100$ | $\pm 0.050$ | $\pm 0.109$ | $\pm 0.046$  | $\pm 0.054$ | $\pm 0.057$ | $\pm 0.036$  | $\pm 0.081$ | $\pm 0.075$ | $\pm 0.063$  | $\pm 0.074$ | $\pm 0.037$  | $\pm 0.050$   | $\pm 0.109$       | $\pm 0.098$       | $\pm 0.087$       | $\pm 0.112$       | $\pm 0.093$       | $\pm 0.140$       |
|         | Acc.1    | 0.079       | 0.078       | 0.057       | 0.101       | 0.015        | 0.046       | 0.063       | 0.013        | 0.054       | 0.035       | -0.004       | 0.100       | 0.003        | 0.023         | 0.058             | <b>-0.002</b>     | 0.050             | 0.010             | 0.033             | 0.010             |
|         |          | $\pm 0.031$ | $\pm 0.034$ | $\pm 0.021$ | $\pm 0.042$ | $\pm 0.048$  | $\pm 0.038$ | $\pm 0.029$ | $\pm 0.018$  | $\pm 0.037$ | $\pm 0.024$ | $\pm 0.028$  | $\pm 0.034$ | $\pm 0.013$  | $\pm 0.030$   | $\pm 0.037$       | $\pm 0.022$       | $\pm 0.037$       | $\pm 0.011$       | $\pm 0.030$       | $\pm 0.025$       |
| A3      | BAcc     | 0.153       | 0.171       | 0.085       | 0.206       | <b>0.013</b> | 0.045       | 0.057       | 0.016        | 0.089       | 0.038       | 0.004        | 0.151       | 0.014        | 0.030         | 0.124             | 0.030             | 0.108             | 0.057             | 0.124             | 0.062             |
|         |          | $\pm 0.060$ | $\pm 0.075$ | $\pm 0.037$ | $\pm 0.082$ | $\pm 0.034$  | $\pm 0.041$ | $\pm 0.043$ | $\pm 0.027$  | $\pm 0.061$ | $\pm 0.057$ | $\pm 0.047$  | $\pm 0.055$ | $\pm 0.028$  | $\pm 0.037$   | $\pm 0.082$       | $\pm 0.074$       | $\pm 0.065$       | $\pm 0.084$       | $\pm 0.070$       | $\pm 0.105$       |
|         | Acc.1    | 0.153       | 0.171       | 0.085       | 0.206       | <b>0.013</b> | 0.045       | 0.058       | 0.016        | 0.089       | 0.038       | 0.004        | 0.151       | 0.014        | 0.030         | 0.124             | 0.029             | 0.108             | 0.058             | 0.124             | 0.062             |
|         |          | $\pm 0.060$ | $\pm 0.075$ | $\pm 0.037$ | $\pm 0.082$ | $\pm 0.034$  | $\pm 0.041$ | $\pm 0.042$ | $\pm 0.027$  | $\pm 0.061$ | $\pm 0.057$ | $\pm 0.047$  | $\pm 0.055$ | $\pm 0.028$  | $\pm 0.036$   | $\pm 0.082$       | $\pm 0.074$       | $\pm 0.065$       | $\pm 0.084$       | $\pm 0.070$       | $\pm 0.105$       |
|         | Acc.2    | 0.103       | 0.115       | 0.054       | 0.139       | <b>0.003</b> | 0.067       | 0.058       | 0.007        | 0.064       | 0.019       | 0.016        | 0.119       | 0.003        | 0.039         | 0.093             | 0.041             | 0.061             | 0.045             | 0.079             | 0.081             |
|         |          | $\pm 0.050$ | $\pm 0.055$ | $\pm 0.023$ | $\pm 0.074$ | $\pm 0.036$  | $\pm 0.051$ | $\pm 0.038$ | $\pm 0.020$  | $\pm 0.051$ | $\pm 0.039$ | $\pm 0.043$  | $\pm 0.028$ | $\pm 0.027$  | $\pm 0.053$   | $\pm 0.060$       | $\pm 0.069$       | $\pm 0.041$       | $\pm 0.106$       | $\pm 0.068$       | $\pm 0.081$       |

Continued on next page

| SubjectMetric |          | DeepConvnet          | EEGNet               | Conformer            | CTNet                | BIOT (f)             | BIOT (l)             | BENDR (f)            | BENDR (l)               | CBraMod (f)          | CBraMod (l)             | EEGPT (f)               | EEGPT (l)            | LaBraM (f)              | LaBraM (l)              | STEEGformer-s (f)    | STEEGformer-s (l)       | STEEGformer-b (f)    | STEEGformer-b (l)       | STEEGformer-h (f)    | STEEGformer-h (l)       |
|---------------|----------|----------------------|----------------------|----------------------|----------------------|----------------------|----------------------|----------------------|-------------------------|----------------------|-------------------------|-------------------------|----------------------|-------------------------|-------------------------|----------------------|-------------------------|----------------------|-------------------------|----------------------|-------------------------|
| A4            | $\kappa$ | 0.227<br>$\pm 0.073$ | 0.192<br>$\pm 0.069$ | 0.097<br>$\pm 0.060$ | 0.255<br>$\pm 0.067$ | 0.080<br>$\pm 0.056$ | 0.103<br>$\pm 0.087$ | 0.054<br>$\pm 0.041$ | 0.010<br>$\pm 0.040$    | 0.076<br>$\pm 0.055$ | 0.069<br>$\pm 0.038$    | $-0.001$<br>$\pm 0.036$ | 0.271<br>$\pm 0.108$ | $-0.013$<br>$\pm 0.049$ | 0.008<br>$\pm 0.029$    | 0.230<br>$\pm 0.099$ | 0.074<br>$\pm 0.085$    | 0.117<br>$\pm 0.070$ | 0.076<br>$\pm 0.057$    | 0.104<br>$\pm 0.037$ | 0.047<br>$\pm 0.055$    |
|               | AUC      | 0.108<br>$\pm 0.039$ | 0.084<br>$\pm 0.024$ | 0.051<br>$\pm 0.024$ | 0.103<br>$\pm 0.037$ | 0.054<br>$\pm 0.031$ | 0.046<br>$\pm 0.036$ | 0.043<br>$\pm 0.026$ | $0.009$<br>$\pm 0.017$  | 0.049<br>$\pm 0.018$ | 0.053<br>$\pm 0.024$    | 0.015<br>$\pm 0.017$    | 0.161<br>$\pm 0.061$ | $-0.008$<br>$\pm 0.017$ | 0.017<br>$\pm 0.016$    | 0.063<br>$\pm 0.018$ | 0.015<br>$\pm 0.013$    | 0.039<br>$\pm 0.013$ | 0.015<br>$\pm 0.009$    | 0.020<br>$\pm 0.019$ | 0.010<br>$\pm 0.008$    |
|               | BAcc     | 0.170<br>$\pm 0.055$ | 0.144<br>$\pm 0.052$ | 0.073<br>$\pm 0.045$ | 0.191<br>$\pm 0.050$ | 0.060<br>$\pm 0.042$ | 0.077<br>$\pm 0.065$ | 0.041<br>$\pm 0.031$ | 0.008<br>$\pm 0.030$    | 0.057<br>$\pm 0.041$ | 0.052<br>$\pm 0.028$    | $-0.001$<br>$\pm 0.027$ | 0.203<br>$\pm 0.081$ | $-0.010$<br>$\pm 0.037$ | 0.006<br>$\pm 0.022$    | 0.172<br>$\pm 0.074$ | 0.056<br>$\pm 0.064$    | 0.088<br>$\pm 0.053$ | 0.057<br>$\pm 0.043$    | 0.078<br>$\pm 0.028$ | 0.035<br>$\pm 0.041$    |
|               | Acc_1    | 0.170<br>$\pm 0.055$ | 0.144<br>$\pm 0.052$ | 0.073<br>$\pm 0.045$ | 0.191<br>$\pm 0.050$ | 0.060<br>$\pm 0.042$ | 0.077<br>$\pm 0.065$ | 0.041<br>$\pm 0.031$ | 0.007<br>$\pm 0.031$    | 0.057<br>$\pm 0.041$ | 0.052<br>$\pm 0.028$    | $-0.001$<br>$\pm 0.027$ | 0.203<br>$\pm 0.081$ | $-0.010$<br>$\pm 0.037$ | 0.006<br>$\pm 0.021$    | 0.172<br>$\pm 0.074$ | 0.056<br>$\pm 0.064$    | 0.088<br>$\pm 0.053$ | 0.059<br>$\pm 0.042$    | 0.078<br>$\pm 0.028$ | 0.036<br>$\pm 0.041$    |
|               | Acc_2    | 0.102<br>$\pm 0.043$ | 0.100<br>$\pm 0.037$ | 0.057<br>$\pm 0.043$ | 0.109<br>$\pm 0.026$ | 0.058<br>$\pm 0.032$ | 0.084<br>$\pm 0.071$ | 0.084<br>$\pm 0.025$ | 0.056<br>$\pm 0.034$    | 0.016<br>$\pm 0.032$ | 0.043<br>$\pm 0.026$    | $0.012$<br>$\pm 0.043$  | 0.167<br>$\pm 0.053$ | $-0.004$<br>$\pm 0.039$ | 0.020<br>$\pm 0.030$    | 0.119<br>$\pm 0.043$ | 0.058<br>$\pm 0.058$    | 0.060<br>$\pm 0.036$ | 0.089<br>$\pm 0.070$    | 0.048<br>$\pm 0.024$ | 0.031<br>$\pm 0.032$    |
| A5            | $\kappa$ | 0.352<br>$\pm 0.124$ | 0.297<br>$\pm 0.128$ | 0.094<br>$\pm 0.068$ | 0.482<br>$\pm 0.169$ | 0.207<br>$\pm 0.151$ | 0.229<br>$\pm 0.162$ | 0.016<br>$\pm 0.050$ | 0.024<br>$\pm 0.032$    | 0.073<br>$\pm 0.055$ | 0.036<br>$\pm 0.048$    | 0.064<br>$\pm 0.043$    | 0.323<br>$\pm 0.070$ | $-0.001$<br>$\pm 0.045$ | $0.000$<br>$\pm 0.031$  | 0.271<br>$\pm 0.103$ | 0.180<br>$\pm 0.100$    | 0.197<br>$\pm 0.051$ | 0.231<br>$\pm 0.103$    | 0.223<br>$\pm 0.076$ | 0.207<br>$\pm 0.138$    |
|               | AUC      | 0.107<br>$\pm 0.039$ | 0.084<br>$\pm 0.028$ | 0.035<br>$\pm 0.024$ | 0.136<br>$\pm 0.035$ | 0.098<br>$\pm 0.067$ | 0.132<br>$\pm 0.090$ | 0.027<br>$\pm 0.041$ | $0.019$<br>$\pm 0.024$  | 0.050<br>$\pm 0.023$ | 0.057<br>$\pm 0.039$    | 0.039<br>$\pm 0.023$    | 0.209<br>$\pm 0.037$ | 0.006<br>$\pm 0.016$    | 0.038<br>$\pm 0.019$    | 0.078<br>$\pm 0.032$ | 0.044<br>$\pm 0.023$    | 0.067<br>$\pm 0.033$ | 0.035<br>$\pm 0.022$    | 0.069<br>$\pm 0.026$ | 0.045<br>$\pm 0.021$    |
|               | BAcc     | 0.264<br>$\pm 0.093$ | 0.223<br>$\pm 0.096$ | 0.070<br>$\pm 0.051$ | 0.362<br>$\pm 0.127$ | 0.155<br>$\pm 0.113$ | 0.171<br>$\pm 0.121$ | 0.012<br>$\pm 0.037$ | 0.018<br>$\pm 0.024$    | 0.055<br>$\pm 0.041$ | 0.027<br>$\pm 0.036$    | 0.048<br>$\pm 0.032$    | 0.243<br>$\pm 0.052$ | $-0.001$<br>$\pm 0.034$ | $0.000$<br>$\pm 0.024$  | 0.204<br>$\pm 0.078$ | 0.135<br>$\pm 0.075$    | 0.148<br>$\pm 0.039$ | 0.173<br>$\pm 0.077$    | 0.167<br>$\pm 0.057$ | 0.155<br>$\pm 0.103$    |
|               | Acc_1    | 0.264<br>$\pm 0.093$ | 0.223<br>$\pm 0.096$ | 0.070<br>$\pm 0.051$ | 0.362<br>$\pm 0.127$ | 0.155<br>$\pm 0.113$ | 0.171<br>$\pm 0.121$ | 0.012<br>$\pm 0.037$ | 0.018<br>$\pm 0.024$    | 0.055<br>$\pm 0.041$ | 0.027<br>$\pm 0.036$    | 0.048<br>$\pm 0.032$    | 0.243<br>$\pm 0.052$ | $-0.001$<br>$\pm 0.034$ | $0.000$<br>$\pm 0.024$  | 0.204<br>$\pm 0.078$ | 0.135<br>$\pm 0.075$    | 0.148<br>$\pm 0.039$ | 0.173<br>$\pm 0.077$    | 0.167<br>$\pm 0.057$ | 0.155<br>$\pm 0.104$    |
|               | Acc_2    | 0.176<br>$\pm 0.084$ | 0.139<br>$\pm 0.068$ | 0.051<br>$\pm 0.041$ | 0.173<br>$\pm 0.057$ | 0.148<br>$\pm 0.108$ | 0.181<br>$\pm 0.123$ | 0.031<br>$\pm 0.054$ | $0.006$<br>$\pm 0.024$  | 0.045<br>$\pm 0.018$ | 0.047<br>$\pm 0.053$    | 0.046<br>$\pm 0.024$    | 0.223<br>$\pm 0.040$ | $0.025$<br>$\pm 0.053$  | 0.043<br>$\pm 0.031$    | 0.152<br>$\pm 0.051$ | 0.154<br>$\pm 0.096$    | 0.095<br>$\pm 0.042$ | 0.191<br>$\pm 0.093$    | 0.095<br>$\pm 0.046$ | 0.186<br>$\pm 0.089$    |
| A6            | $\kappa$ | 0.204<br>$\pm 0.080$ | 0.259<br>$\pm 0.112$ | 0.114<br>$\pm 0.060$ | 0.326<br>$\pm 0.141$ | 0.125<br>$\pm 0.047$ | 0.145<br>$\pm 0.123$ | 0.117<br>$\pm 0.042$ | 0.006<br>$\pm 0.028$    | 0.148<br>$\pm 0.056$ | $-0.020$<br>$\pm 0.044$ | 0.044<br>$\pm 0.068$    | 0.269<br>$\pm 0.117$ | 0.008<br>$\pm 0.036$    | $-0.010$<br>$\pm 0.058$ | 0.162<br>$\pm 0.078$ | 0.052<br>$\pm 0.081$    | 0.126<br>$\pm 0.068$ | 0.039<br>$\pm 0.086$    | 0.152<br>$\pm 0.106$ | 0.050<br>$\pm 0.164$    |
|               | AUC      | 0.089<br>$\pm 0.033$ | 0.095<br>$\pm 0.047$ | 0.049<br>$\pm 0.032$ | 0.118<br>$\pm 0.053$ | 0.070<br>$\pm 0.022$ | 0.077<br>$\pm 0.083$ | 0.069<br>$\pm 0.032$ | 0.005<br>$\pm 0.011$    | 0.073<br>$\pm 0.020$ | 0.027<br>$\pm 0.038$    | 0.034<br>$\pm 0.026$    | 0.161<br>$\pm 0.047$ | 0.011<br>$\pm 0.023$    | 0.027<br>$\pm 0.039$    | 0.054<br>$\pm 0.037$ | $-0.007$<br>$\pm 0.023$ | 0.038<br>$\pm 0.024$ | $-0.013$<br>$\pm 0.016$ | 0.052<br>$\pm 0.033$ | $-0.009$<br>$\pm 0.015$ |
|               | BAcc     | 0.153<br>$\pm 0.060$ | 0.194<br>$\pm 0.084$ | 0.086<br>$\pm 0.045$ | 0.245<br>$\pm 0.105$ | 0.094<br>$\pm 0.035$ | 0.109<br>$\pm 0.092$ | 0.088<br>$\pm 0.032$ | 0.004<br>$\pm 0.021$    | 0.111<br>$\pm 0.042$ | $-0.015$<br>$\pm 0.033$ | 0.033<br>$\pm 0.051$    | 0.201<br>$\pm 0.088$ | 0.006<br>$\pm 0.027$    | $-0.008$<br>$\pm 0.043$ | 0.122<br>$\pm 0.058$ | 0.039<br>$\pm 0.061$    | 0.095<br>$\pm 0.051$ | 0.029<br>$\pm 0.064$    | 0.114<br>$\pm 0.080$ | 0.038<br>$\pm 0.123$    |
|               | Acc_1    | 0.153<br>$\pm 0.060$ | 0.194<br>$\pm 0.084$ | 0.086<br>$\pm 0.045$ | 0.245<br>$\pm 0.105$ | 0.094<br>$\pm 0.035$ | 0.109<br>$\pm 0.092$ | 0.088<br>$\pm 0.032$ | 0.004<br>$\pm 0.021$    | 0.111<br>$\pm 0.042$ | $-0.014$<br>$\pm 0.033$ | 0.033<br>$\pm 0.051$    | 0.201<br>$\pm 0.088$ | 0.006<br>$\pm 0.027$    | $-0.007$<br>$\pm 0.043$ | 0.122<br>$\pm 0.058$ | 0.039<br>$\pm 0.061$    | 0.095<br>$\pm 0.051$ | 0.029<br>$\pm 0.064$    | 0.114<br>$\pm 0.080$ | 0.039<br>$\pm 0.122$    |
|               | Acc_2    | 0.092<br>$\pm 0.056$ | 0.114<br>$\pm 0.062$ | 0.059<br>$\pm 0.060$ | 0.138<br>$\pm 0.057$ | 0.091<br>$\pm 0.043$ | 0.105<br>$\pm 0.080$ | 0.071<br>$\pm 0.042$ | $0.010$<br>$\pm 0.028$  | 0.075<br>$\pm 0.027$ | 0.013<br>$\pm 0.043$    | 0.039<br>$\pm 0.031$    | 0.164<br>$\pm 0.049$ | 0.026<br>$\pm 0.037$    | 0.016<br>$\pm 0.029$    | 0.086<br>$\pm 0.047$ | 0.046<br>$\pm 0.047$    | 0.055<br>$\pm 0.021$ | $0.008$<br>$\pm 0.055$  | 0.079<br>$\pm 0.054$ | 0.037<br>$\pm 0.086$    |
| A7            | $\kappa$ | 0.241<br>$\pm 0.129$ | 0.282<br>$\pm 0.151$ | 0.057<br>$\pm 0.070$ | 0.319<br>$\pm 0.122$ | 0.091<br>$\pm 0.075$ | 0.165<br>$\pm 0.135$ | 0.034<br>$\pm 0.058$ | $-0.010$<br>$\pm 0.037$ | 0.054<br>$\pm 0.075$ | 0.042<br>$\pm 0.083$    | $0.005$<br>$\pm 0.032$  | 0.254<br>$\pm 0.087$ | 0.010<br>$\pm 0.035$    | 0.013<br>$\pm 0.050$    | 0.171<br>$\pm 0.087$ | 0.106<br>$\pm 0.114$    | 0.185<br>$\pm 0.090$ | 0.144<br>$\pm 0.097$    | 0.152<br>$\pm 0.082$ | 0.141<br>$\pm 0.132$    |

Continued on next page

| Subject | Metric   | DeepConvnet | EEGNet      | Conformer   | CTNet       | BIOT (f)    | BIOT (l)    | BENDR (f)   | BENDR (l)    | CBraMod (f) | CBraMod (l) | EEGPT (f)    | EEGPT (l)   | LaBraM (f)   | LaBraM (l)   | STEEGformer-s (j) | STEEGformer-s (l) | STEEGformer-b (j) | STEEGformer-b (l) | STEEGformer-l (j) | STEEGformer-l (l) |
|---------|----------|-------------|-------------|-------------|-------------|-------------|-------------|-------------|--------------|-------------|-------------|--------------|-------------|--------------|--------------|-------------------|-------------------|-------------------|-------------------|-------------------|-------------------|
| A8      | AUC      | 0.081       | 0.078       | 0.027       | 0.093       | 0.047       | 0.057       | 0.028       | <b>0.005</b> | 0.030       | 0.035       | 0.006        | 0.118       | -0.012       | 0.018        | 0.069             | 0.033             | 0.066             | 0.034             | 0.067             | 0.040             |
|         |          | $\pm 0.036$ | $\pm 0.041$ | $\pm 0.041$ | $\pm 0.042$ | $\pm 0.034$ | $\pm 0.051$ | $\pm 0.044$ | $\pm 0.017$  | $\pm 0.032$ | $\pm 0.031$ | $\pm 0.013$  | $\pm 0.039$ | $\pm 0.013$  | $\pm 0.030$  | $\pm 0.046$       | $\pm 0.022$       | $\pm 0.050$       | $\pm 0.008$       | $\pm 0.045$       | $\pm 0.021$       |
|         | BAcc     | 0.181       | 0.211       | 0.043       | 0.239       | 0.069       | 0.124       | 0.025       | -0.008       | 0.041       | 0.032       | <b>0.003</b> | 0.191       | 0.007        | 0.010        | 0.128             | 0.079             | 0.138             | 0.108             | 0.114             | 0.106             |
|         |          | $\pm 0.097$ | $\pm 0.113$ | $\pm 0.052$ | $\pm 0.091$ | $\pm 0.056$ | $\pm 0.101$ | $\pm 0.044$ | $\pm 0.027$  | $\pm 0.056$ | $\pm 0.062$ | $\pm 0.024$  | $\pm 0.065$ | $\pm 0.026$  | $\pm 0.038$  | $\pm 0.065$       | $\pm 0.085$       | $\pm 0.067$       | $\pm 0.073$       | $\pm 0.062$       | $\pm 0.099$       |
|         | Acc.1    | 0.181       | 0.211       | 0.043       | 0.239       | 0.069       | 0.124       | 0.025       | -0.008       | 0.041       | 0.032       | <b>0.003</b> | 0.191       | 0.007        | 0.009        | 0.128             | 0.079             | 0.138             | 0.108             | 0.114             | 0.106             |
|         |          | $\pm 0.097$ | $\pm 0.113$ | $\pm 0.052$ | $\pm 0.091$ | $\pm 0.056$ | $\pm 0.101$ | $\pm 0.044$ | $\pm 0.027$  | $\pm 0.056$ | $\pm 0.062$ | $\pm 0.024$  | $\pm 0.065$ | $\pm 0.026$  | $\pm 0.037$  | $\pm 0.065$       | $\pm 0.085$       | $\pm 0.067$       | $\pm 0.073$       | $\pm 0.062$       | $\pm 0.099$       |
|         | Acc.2    | 0.137       | 0.173       | 0.043       | 0.192       | 0.063       | 0.074       | 0.032       | -0.005       | 0.042       | 0.034       | 0.011        | 0.129       | <b>0.001</b> | 0.024        | 0.103             | 0.077             | 0.082             | 0.088             | 0.070             | 0.064             |
|         |          | $\pm 0.058$ | $\pm 0.105$ | $\pm 0.041$ | $\pm 0.094$ | $\pm 0.053$ | $\pm 0.099$ | $\pm 0.065$ | $\pm 0.028$  | $\pm 0.034$ | $\pm 0.048$ | $\pm 0.024$  | $\pm 0.074$ | $\pm 0.023$  | $\pm 0.022$  | $\pm 0.046$       | $\pm 0.067$       | $\pm 0.035$       | $\pm 0.067$       | $\pm 0.053$       | $\pm 0.077$       |
|         | $\kappa$ | 0.240       | 0.259       | 0.072       | 0.262       | 0.093       | 0.044       | 0.061       | -0.001       | 0.134       | 0.024       | 0.041        | 0.225       | <b>0.010</b> | 0.011        | 0.123             | 0.047             | 0.100             | 0.116             | 0.119             | 0.099             |
|         |          | $\pm 0.103$ | $\pm 0.096$ | $\pm 0.084$ | $\pm 0.116$ | $\pm 0.060$ | $\pm 0.052$ | $\pm 0.035$ | $\pm 0.032$  | $\pm 0.065$ | $\pm 0.044$ | $\pm 0.037$  | $\pm 0.082$ | $\pm 0.035$  | $\pm 0.043$  | $\pm 0.055$       | $\pm 0.063$       | $\pm 0.047$       | $\pm 0.142$       | $\pm 0.062$       | $\pm 0.107$       |
| A9      | AUC      | 0.091       | 0.106       | 0.037       | 0.105       | 0.040       | 0.056       | 0.039       | 0.001        | 0.057       | 0.057       | 0.010        | 0.125       | <b>0.008</b> | 0.010        | 0.057             | 0.024             | 0.048             | 0.025             | 0.044             | 0.020             |
|         |          | $\pm 0.041$ | $\pm 0.042$ | $\pm 0.035$ | $\pm 0.045$ | $\pm 0.035$ | $\pm 0.057$ | $\pm 0.037$ | $\pm 0.018$  | $\pm 0.023$ | $\pm 0.027$ | $\pm 0.025$  | $\pm 0.043$ | $\pm 0.026$  | $\pm 0.030$  | $\pm 0.037$       | $\pm 0.021$       | $\pm 0.027$       | $\pm 0.014$       | $\pm 0.028$       | $\pm 0.022$       |
|         | BAcc     | 0.180       | 0.194       | 0.054       | 0.197       | 0.070       | 0.033       | 0.046       | -0.001       | 0.101       | 0.018       | 0.031        | 0.169       | <b>0.008</b> | 0.008        | 0.092             | 0.035             | 0.075             | 0.087             | 0.089             | 0.074             |
|         |          | $\pm 0.077$ | $\pm 0.072$ | $\pm 0.063$ | $\pm 0.087$ | $\pm 0.045$ | $\pm 0.039$ | $\pm 0.026$ | $\pm 0.024$  | $\pm 0.049$ | $\pm 0.033$ | $\pm 0.028$  | $\pm 0.061$ | $\pm 0.026$  | $\pm 0.033$  | $\pm 0.041$       | $\pm 0.047$       | $\pm 0.036$       | $\pm 0.107$       | $\pm 0.046$       | $\pm 0.081$       |
|         | Acc.1    | 0.180       | 0.194       | 0.054       | 0.197       | 0.070       | 0.033       | 0.045       | -0.000       | 0.101       | 0.019       | 0.031        | 0.169       | 0.008        | <b>0.008</b> | 0.092             | 0.036             | 0.075             | 0.087             | 0.089             | 0.074             |
|         |          | $\pm 0.077$ | $\pm 0.072$ | $\pm 0.063$ | $\pm 0.087$ | $\pm 0.045$ | $\pm 0.039$ | $\pm 0.025$ | $\pm 0.023$  | $\pm 0.049$ | $\pm 0.034$ | $\pm 0.028$  | $\pm 0.061$ | $\pm 0.026$  | $\pm 0.033$  | $\pm 0.041$       | $\pm 0.047$       | $\pm 0.036$       | $\pm 0.107$       | $\pm 0.046$       | $\pm 0.081$       |
|         | Acc.2    | 0.120       | 0.134       | 0.046       | 0.131       | 0.055       | 0.078       | 0.044       | -0.000       | 0.063       | 0.075       | 0.022        | 0.148       | <b>0.018</b> | 0.040        | 0.098             | 0.042             | 0.072             | 0.045             | 0.073             | 0.086             |
|         |          | $\pm 0.065$ | $\pm 0.041$ | $\pm 0.042$ | $\pm 0.055$ | $\pm 0.060$ | $\pm 0.080$ | $\pm 0.038$ | $\pm 0.036$  | $\pm 0.033$ | $\pm 0.030$ | $\pm 0.041$  | $\pm 0.076$ | $\pm 0.038$  | $\pm 0.045$  | $\pm 0.043$       | $\pm 0.083$       | $\pm 0.043$       | $\pm 0.068$       | $\pm 0.050$       | $\pm 0.094$       |
|         | $\kappa$ | 0.264       | 0.246       | 0.086       | 0.304       | 0.055       | 0.147       | 0.084       | -0.012       | 0.095       | 0.087       | <b>0.026</b> | 0.260       | 0.046        | 0.058        | 0.197             | 0.108             | 0.112             | 0.151             | 0.101             | 0.134             |
|         |          | $\pm 0.114$ | $\pm 0.071$ | $\pm 0.052$ | $\pm 0.082$ | $\pm 0.063$ | $\pm 0.112$ | $\pm 0.059$ | $\pm 0.039$  | $\pm 0.059$ | $\pm 0.035$ | $\pm 0.054$  | $\pm 0.070$ | $\pm 0.044$  | $\pm 0.048$  | $\pm 0.092$       | $\pm 0.073$       | $\pm 0.060$       | $\pm 0.078$       | $\pm 0.064$       | $\pm 0.114$       |
| A9      | AUC      | 0.096       | 0.097       | 0.041       | 0.102       | 0.044       | 0.103       | 0.045       | 0.003        | 0.051       | 0.035       | 0.016        | 0.135       | <b>0.010</b> | 0.015        | 0.070             | 0.036             | 0.034             | 0.026             | 0.040             | 0.026             |
|         |          | $\pm 0.023$ | $\pm 0.026$ | $\pm 0.030$ | $\pm 0.026$ | $\pm 0.029$ | $\pm 0.072$ | $\pm 0.033$ | $\pm 0.021$  | $\pm 0.018$ | $\pm 0.013$ | $\pm 0.027$  | $\pm 0.028$ | $\pm 0.035$  | $\pm 0.020$  | $\pm 0.048$       | $\pm 0.025$       | $\pm 0.023$       | $\pm 0.013$       | $\pm 0.015$       | $\pm 0.033$       |
|         | BAcc     | 0.198       | 0.184       | 0.064       | 0.228       | 0.041       | 0.110       | 0.063       | -0.009       | 0.071       | 0.066       | <b>0.020</b> | 0.195       | 0.035        | 0.043        | 0.148             | 0.081             | 0.084             | 0.113             | 0.076             | 0.100             |
|         |          | $\pm 0.085$ | $\pm 0.053$ | $\pm 0.039$ | $\pm 0.061$ | $\pm 0.047$ | $\pm 0.084$ | $\pm 0.044$ | $\pm 0.029$  | $\pm 0.044$ | $\pm 0.026$ | $\pm 0.040$  | $\pm 0.053$ | $\pm 0.033$  | $\pm 0.036$  | $\pm 0.069$       | $\pm 0.055$       | $\pm 0.045$       | $\pm 0.059$       | $\pm 0.048$       | $\pm 0.085$       |
|         | Acc.1    | 0.198       | 0.184       | 0.064       | 0.228       | 0.041       | 0.110       | 0.063       | -0.009       | 0.071       | 0.066       | <b>0.020</b> | 0.195       | 0.035        | 0.043        | 0.148             | 0.080             | 0.084             | 0.113             | 0.076             | 0.101             |
|         |          | $\pm 0.085$ | $\pm 0.053$ | $\pm 0.039$ | $\pm 0.061$ | $\pm 0.047$ | $\pm 0.084$ | $\pm 0.044$ | $\pm 0.029$  | $\pm 0.044$ | $\pm 0.026$ | $\pm 0.040$  | $\pm 0.053$ | $\pm 0.033$  | $\pm 0.036$  | $\pm 0.069$       | $\pm 0.054$       | $\pm 0.045$       | $\pm 0.059$       | $\pm 0.048$       | $\pm 0.085$       |
|         | Acc.2    | 0.127       | 0.116       | 0.049       | 0.155       | 0.048       | 0.130       | 0.056       | <b>0.017</b> | 0.048       | 0.062       | 0.014        | 0.166       | 0.042        | 0.049        | 0.085             | 0.086             | 0.036             | 0.112             | 0.033             | 0.099             |
|         |          | $\pm 0.047$ | $\pm 0.042$ | $\pm 0.035$ | $\pm 0.028$ | $\pm 0.021$ | $\pm 0.085$ | $\pm 0.026$ | $\pm 0.026$  | $\pm 0.029$ | $\pm 0.032$ | $\pm 0.041$  | $\pm 0.043$ | $\pm 0.043$  | $\pm 0.051$  | $\pm 0.050$       | $\pm 0.073$       | $\pm 0.024$       | $\pm 0.084$       | $\pm 0.028$       | $\pm 0.112$       |

## C 7-MOVEMENT UPPER LIMB MOTOR EXECUTION CLASSIFICATION

## C.1 POPULATION-LEVEL RESULTS

Table 15: Average Performance Metrics Across All Subjects of Population-Trained Models

| Model (Training strategy) | $\kappa$     | AUC          | BAcc         | Acc.1        | Acc.2        |
|---------------------------|--------------|--------------|--------------|--------------|--------------|
|                           | 0.289        | 0.780        | 0.391        | 0.391        | 0.598        |
| <b>DeepConvnet</b>        | $\pm 0.135$  | $\pm 0.064$  | $\pm 0.115$  | $\pm 0.115$  | $\pm 0.103$  |
|                           | 0.278        | 0.770        | 0.381        | 0.381        | 0.596        |
| <b>EEGNet</b>             | $\pm 0.127$  | $\pm 0.067$  | $\pm 0.109$  | $\pm 0.109$  | $\pm 0.096$  |
|                           | 0.286        | 0.758        | 0.388        | 0.388        | 0.594        |
| <b>Conformer</b>          | $\pm 0.158$  | $\pm 0.076$  | $\pm 0.136$  | $\pm 0.136$  | $\pm 0.113$  |
|                           | 0.293        | 0.785        | 0.394        | 0.394        | 0.611        |
| <b>CTNet</b>              | $\pm 0.126$  | $\pm 0.062$  | $\pm 0.108$  | $\pm 0.108$  | $\pm 0.092$  |
|                           | 0.110        | 0.592        | 0.237        | 0.237        | 0.398        |
| <b>BIOT (f)</b>           | $\pm 0.084$  | $\pm 0.061$  | $\pm 0.072$  | $\pm 0.072$  | $\pm 0.073$  |
|                           | 0.010        | 0.539        | 0.151        | 0.151        | 0.296        |
| <b>BIOT (l)</b>           | $\pm 0.019$  | $\pm 0.034$  | $\pm 0.017$  | $\pm 0.017$  | $\pm 0.025$  |
|                           | 0.200        | 0.683        | 0.314        | 0.314        | 0.497        |
| <b>BENDR (f)</b>          | $\pm 0.079$  | $\pm 0.056$  | $\pm 0.068$  | $\pm 0.068$  | $\pm 0.074$  |
|                           | 0.043        | 0.556        | 0.179        | 0.179        | 0.342        |
| <b>BENDR (l)</b>          | $\pm 0.025$  | $\pm 0.026$  | $\pm 0.022$  | $\pm 0.022$  | $\pm 0.032$  |
|                           | 0.145        | 0.625        | 0.267        | 0.267        | 0.440        |
| <b>CBraMod (f)</b>        | $\pm 0.137$  | $\pm 0.099$  | $\pm 0.118$  | $\pm 0.118$  | $\pm 0.140$  |
|                           | -0.006       | 0.482        | 0.137        | 0.137        | 0.276        |
| <b>CBraMod (l)</b>        | $\pm 0.010$  | $\pm 0.022$  | $\pm 0.008$  | $\pm 0.009$  | $\pm 0.014$  |
|                           | 0.106        | 0.605        | 0.233        | 0.233        | 0.403        |
| <b>EEGPT (f)</b>          | $\pm 0.096$  | $\pm 0.065$  | $\pm 0.082$  | $\pm 0.082$  | $\pm 0.078$  |
|                           | 0.175        | 0.677        | 0.293        | 0.293        | 0.486        |
| <b>EEGPT (l)</b>          | $\pm 0.088$  | $\pm 0.061$  | $\pm 0.076$  | $\pm 0.076$  | $\pm 0.085$  |
|                           | 0.037        | 0.559        | 0.175        | 0.174        | 0.340        |
| <b>LaBraM (f)</b>         | $\pm 0.015$  | $\pm 0.020$  | $\pm 0.013$  | $\pm 0.016$  | $\pm 0.022$  |
|                           | -0.002       | 0.496        | 0.141        | 0.142        | 0.284        |
| <b>LaBraM (l)</b>         | $\pm 0.016$  | $\pm 0.021$  | $\pm 0.013$  | $\pm 0.013$  | $\pm 0.024$  |
|                           | 0.414        | 0.793        | 0.497        | 0.497        | 0.693        |
| <b>STEEGformer-s (f)</b>  | $\pm 0.192$  | $\pm 0.082$  | $\pm 0.165$  | $\pm 0.165$  | $\pm 0.119$  |
|                           | 0.082        | 0.603        | 0.213        | 0.213        | 0.374        |
| <b>STEEGformer-s (l)</b>  | $\pm 0.077$  | $\pm 0.066$  | $\pm 0.066$  | $\pm 0.066$  | $\pm 0.070$  |
|                           | <b>0.426</b> | <b>0.802</b> | <b>0.508</b> | <b>0.508</b> | <b>0.698</b> |
| <b>STEEGformer-b (f)</b>  | $\pm 0.193$  | $\pm 0.083$  | $\pm 0.165$  | $\pm 0.165$  | $\pm 0.122$  |
|                           | 0.094        | 0.613        | 0.224        | 0.224        | 0.395        |
| <b>STEEGformer-b (l)</b>  | $\pm 0.080$  | $\pm 0.080$  | $\pm 0.069$  | $\pm 0.069$  | $\pm 0.089$  |
|                           | 0.453        | 0.810        | 0.531        | 0.534        | 0.734        |
| <b>STEEGformer-l (f)</b>  | $\pm 0.184$  | $\pm 0.075$  | $\pm 0.157$  | $\pm 0.158$  | $\pm 0.104$  |
|                           | 0.105        | 0.620        | 0.233        | 0.232        | 0.398        |
| <b>STEEGformer-l (l)</b>  | $\pm 0.082$  | $\pm 0.076$  | $\pm 0.070$  | $\pm 0.070$  | $\pm 0.091$  |

Table 16: Per-Subject Performance Metrics of Population-Trained Models

| Subject          | Metric           | DeepConvnet          | EEGNet               | Conformer                          | CTNet                | BIOT (f)             | BIOT (l)             | BENDR (f)            | BENDR (l)            | CBraMod (f)          | CBraMod (l)           | EEGPT (f)             | EEGPT (l)            | LaBraM (f)           | LaBraM (l)            | STEEGformer-s (f)                  | STEEGformer-s (l)                  | STEEGformer-b (f)                  | STEEGformer-b (l)    | STEEGformer-l (f)                  | STEEGformer-l (l)                  |
|------------------|------------------|----------------------|----------------------|------------------------------------|----------------------|----------------------|----------------------|----------------------|----------------------|----------------------|-----------------------|-----------------------|----------------------|----------------------|-----------------------|------------------------------------|------------------------------------|------------------------------------|----------------------|------------------------------------|------------------------------------|
| sub1             | $\kappa$         | 0.217<br>$\pm 0.050$ | 0.267<br>$\pm 0.046$ | 0.228<br>$\pm 0.087$               | 0.206<br>$\pm 0.018$ | 0.078<br>$\pm 0.025$ | 0.000<br>$\pm 0.000$ | 0.153<br>$\pm 0.089$ | 0.044<br>$\pm 0.030$ | 0.061<br>$\pm 0.045$ | -0.006<br>$\pm 0.032$ | 0.042<br>$\pm 0.064$  | 0.164<br>$\pm 0.057$ | 0.017<br>$\pm 0.023$ | -0.022<br>$\pm 0.015$ | <b>0.344</b><br>$\pm$ <b>0.043</b> | 0.072<br>$\pm 0.030$               | 0.314<br>$\pm 0.054$               | 0.053<br>$\pm 0.006$ | 0.372<br>$\pm 0.067$               | 0.056<br>$\pm 0.020$               |
|                  | AUC              | 0.725<br>$\pm 0.021$ | 0.754<br>$\pm 0.013$ | 0.732<br>$\pm 0.039$               | 0.744<br>$\pm 0.018$ | 0.575<br>$\pm 0.023$ | 0.589<br>$\pm 0.037$ | 0.641<br>$\pm 0.035$ | 0.538<br>$\pm 0.019$ | 0.570<br>$\pm 0.022$ | 0.504<br>$\pm 0.032$  | 0.567<br>$\pm 0.037$  | 0.662<br>$\pm 0.029$ | 0.550<br>$\pm 0.065$ | 0.512<br>$\pm 0.023$  | <b>0.754</b><br>$\pm$ <b>0.022</b> | 0.584<br>$\pm 0.035$               | 0.746<br>$\pm 0.021$               | 0.552<br>$\pm 0.039$ | 0.770<br>$\pm 0.020$               | 0.580<br>$\pm 0.026$               |
|                  | BAcc             | 0.329<br>$\pm 0.043$ | 0.371<br>$\pm 0.040$ | 0.338<br>$\pm 0.075$               | 0.319<br>$\pm 0.016$ | 0.210<br>$\pm 0.022$ | 0.143<br>$\pm 0.000$ | 0.274<br>$\pm 0.076$ | 0.181<br>$\pm 0.026$ | 0.195<br>$\pm 0.038$ | 0.138<br>$\pm 0.027$  | 0.179<br>$\pm 0.055$  | 0.283<br>$\pm 0.049$ | 0.157<br>$\pm 0.020$ | 0.124<br>$\pm 0.013$  | <b>0.438</b><br>$\pm$ <b>0.037</b> | 0.205<br>$\pm 0.026$               | 0.412<br>$\pm 0.047$               | 0.188<br>$\pm 0.005$ | 0.461<br>$\pm 0.058$               | 0.190<br>$\pm 0.017$               |
|                  | Acc <sub>1</sub> | 0.329<br>$\pm 0.043$ | 0.371<br>$\pm 0.040$ | 0.336<br>$\pm 0.073$               | 0.319<br>$\pm 0.016$ | 0.210<br>$\pm 0.022$ | 0.143<br>$\pm 0.000$ | 0.276<br>$\pm 0.080$ | 0.181<br>$\pm 0.026$ | 0.195<br>$\pm 0.038$ | 0.133<br>$\pm 0.023$  | 0.179<br>$\pm 0.055$  | 0.283<br>$\pm 0.049$ | 0.155<br>$\pm 0.022$ | 0.124<br>$\pm 0.013$  | <b>0.438</b><br>$\pm$ <b>0.037</b> | 0.205<br>$\pm 0.026$               | 0.412<br>$\pm 0.047$               | 0.186<br>$\pm 0.011$ | 0.463<br>$\pm 0.056$               | 0.188<br>$\pm 0.016$               |
|                  | Acc <sub>2</sub> | 0.543<br>$\pm 0.059$ | 0.576<br>$\pm 0.040$ | 0.562<br>$\pm 0.053$               | 0.552<br>$\pm 0.043$ | 0.364<br>$\pm 0.014$ | 0.286<br>$\pm 0.000$ | 0.440<br>$\pm 0.060$ | 0.333<br>$\pm 0.029$ | 0.355<br>$\pm 0.028$ | 0.283<br>$\pm 0.018$  | 0.386<br>$\pm 0.060$  | 0.445<br>$\pm 0.037$ | 0.314<br>$\pm 0.051$ | 0.288<br>$\pm 0.018$  | <b>0.638</b><br>$\pm$ <b>0.063</b> | 0.362<br>$\pm 0.047$               | 0.605<br>$\pm 0.016$               | 0.333<br>$\pm 0.017$ | 0.679<br>$\pm 0.042$               | 0.340<br>$\pm 0.023$               |
|                  | sub10            | $\kappa$             | 0.236<br>$\pm 0.052$ | 0.289<br>$\pm 0.074$               | 0.331<br>$\pm 0.096$ | 0.286<br>$\pm 0.027$ | 0.069<br>$\pm 0.040$ | 0.019<br>$\pm 0.035$ | 0.242<br>$\pm 0.064$ | 0.031<br>$\pm 0.025$ | 0.103<br>$\pm 0.036$  | -0.011<br>$\pm 0.012$ | 0.058<br>$\pm 0.086$ | 0.133<br>$\pm 0.039$ | 0.031<br>$\pm 0.042$  | -0.006<br>$\pm 0.026$              | 0.361<br>$\pm 0.076$               | 0.017<br>$\pm 0.060$               | 0.450<br>$\pm 0.056$ | 0.067<br>$\pm 0.079$               | <b>0.399</b><br>$\pm$ <b>0.040</b> |
| AUC              |                  | 0.793<br>$\pm 0.022$ | 0.804<br>$\pm 0.013$ | <b>0.816</b><br>$\pm$ <b>0.025</b> | 0.807<br>$\pm 0.023$ | 0.566<br>$\pm 0.029$ | 0.514<br>$\pm 0.020$ | 0.727<br>$\pm 0.031$ | 0.574<br>$\pm 0.026$ | 0.606<br>$\pm 0.034$ | 0.451<br>$\pm 0.012$  | 0.599<br>$\pm 0.028$  | 0.658<br>$\pm 0.025$ | 0.574<br>$\pm 0.057$ | 0.498<br>$\pm 0.039$  | 0.809<br>$\pm 0.022$               | 0.555<br>$\pm 0.068$               | 0.831<br>$\pm 0.020$               | 0.576<br>$\pm 0.040$ | 0.805<br>$\pm 0.019$               | 0.581<br>$\pm 0.042$               |
| BAcc             |                  | 0.345<br>$\pm 0.045$ | 0.390<br>$\pm 0.063$ | 0.426<br>$\pm 0.083$               | 0.388<br>$\pm 0.023$ | 0.202<br>$\pm 0.035$ | 0.160<br>$\pm 0.030$ | 0.350<br>$\pm 0.055$ | 0.169<br>$\pm 0.021$ | 0.231<br>$\pm 0.031$ | 0.133<br>$\pm 0.010$  | 0.193<br>$\pm 0.074$  | 0.257<br>$\pm 0.033$ | 0.169<br>$\pm 0.036$ | 0.138<br>$\pm 0.022$  | 0.452<br>$\pm 0.065$               | 0.157<br>$\pm 0.051$               | 0.529<br>$\pm 0.048$               | 0.200<br>$\pm 0.068$ | <b>0.485</b><br>$\pm$ <b>0.034</b> | 0.210<br>$\pm 0.041$               |
| Acc <sub>1</sub> |                  | 0.345<br>$\pm 0.045$ | 0.390<br>$\pm 0.063$ | 0.426<br>$\pm 0.083$               | 0.386<br>$\pm 0.022$ | 0.202<br>$\pm 0.035$ | 0.160<br>$\pm 0.030$ | 0.350<br>$\pm 0.055$ | 0.169<br>$\pm 0.021$ | 0.231<br>$\pm 0.031$ | 0.133<br>$\pm 0.010$  | 0.193<br>$\pm 0.074$  | 0.257<br>$\pm 0.033$ | 0.171<br>$\pm 0.036$ | 0.138<br>$\pm 0.022$  | 0.452<br>$\pm 0.065$               | 0.155<br>$\pm 0.052$               | 0.529<br>$\pm 0.048$               | 0.200<br>$\pm 0.068$ | <b>0.492</b><br>$\pm$ <b>0.034</b> | 0.210<br>$\pm 0.041$               |
| Acc <sub>2</sub> |                  | 0.605<br>$\pm 0.059$ | 0.645<br>$\pm 0.034$ | 0.667<br>$\pm 0.075$               | 0.650<br>$\pm 0.064$ | 0.371<br>$\pm 0.055$ | 0.293<br>$\pm 0.034$ | 0.583<br>$\pm 0.079$ | 0.362<br>$\pm 0.059$ | 0.398<br>$\pm 0.047$ | 0.290<br>$\pm 0.025$  | 0.379<br>$\pm 0.044$  | 0.464<br>$\pm 0.063$ | 0.345<br>$\pm 0.065$ | 0.274<br>$\pm 0.054$  | 0.712<br>$\pm 0.061$               | 0.305<br>$\pm 0.099$               | 0.750<br>$\pm 0.035$               | 0.379<br>$\pm 0.071$ | <b>0.748</b><br>$\pm$ <b>0.047</b> | 0.355<br>$\pm 0.040$               |
| sub11            |                  | $\kappa$             | 0.211<br>$\pm 0.054$ | 0.242<br>$\pm 0.029$               | 0.222<br>$\pm 0.102$ | 0.256<br>$\pm 0.045$ | 0.089<br>$\pm 0.036$ | 0.050<br>$\pm 0.029$ | 0.158<br>$\pm 0.051$ | 0.011<br>$\pm 0.036$ | 0.094<br>$\pm 0.032$  | 0.000<br>$\pm 0.000$  | 0.056<br>$\pm 0.047$ | 0.089<br>$\pm 0.021$ | 0.053<br>$\pm 0.049$  | 0.000<br>$\pm 0.050$               | <b>0.283</b><br>$\pm$ <b>0.063</b> | 0.033<br>$\pm 0.021$               | 0.306<br>$\pm 0.031$ | 0.056<br>$\pm 0.020$               | 0.278<br>$\pm 0.059$               |
|                  | AUC              | 0.738<br>$\pm 0.018$ | 0.740<br>$\pm 0.026$ | 0.727<br>$\pm 0.056$               | 0.757<br>$\pm 0.012$ | 0.566<br>$\pm 0.025$ | 0.549<br>$\pm 0.021$ | 0.638<br>$\pm 0.038$ | 0.514<br>$\pm 0.042$ | 0.573<br>$\pm 0.040$ | 0.470<br>$\pm 0.052$  | 0.563<br>$\pm 0.039$  | 0.605<br>$\pm 0.018$ | 0.546<br>$\pm 0.047$ | 0.519<br>$\pm 0.032$  | 0.728<br>$\pm 0.029$               | 0.568<br>$\pm 0.044$               | <b>0.750</b><br>$\pm$ <b>0.041</b> | 0.598<br>$\pm 0.047$ | 0.745<br>$\pm 0.025$               | 0.589<br>$\pm 0.045$               |
|                  | BAcc             | 0.324<br>$\pm 0.046$ | 0.350<br>$\pm 0.025$ | 0.333<br>$\pm 0.087$               | 0.362<br>$\pm 0.038$ | 0.219<br>$\pm 0.031$ | 0.186<br>$\pm 0.025$ | 0.279<br>$\pm 0.043$ | 0.152<br>$\pm 0.031$ | 0.224<br>$\pm 0.027$ | 0.143<br>$\pm 0.000$  | 0.190<br>$\pm 0.040$  | 0.219<br>$\pm 0.018$ | 0.188<br>$\pm 0.042$ | 0.143<br>$\pm 0.043$  | <b>0.386</b><br>$\pm$ <b>0.054</b> | 0.171<br>$\pm 0.018$               | 0.405<br>$\pm 0.027$               | 0.190<br>$\pm 0.017$ | 0.381<br>$\pm 0.051$               | 0.200<br>$\pm 0.040$               |
|                  | Acc <sub>1</sub> | 0.326<br>$\pm 0.042$ | 0.350<br>$\pm 0.025$ | 0.333<br>$\pm 0.087$               | 0.362<br>$\pm 0.038$ | 0.219<br>$\pm 0.031$ | 0.186<br>$\pm 0.025$ | 0.279<br>$\pm 0.043$ | 0.152<br>$\pm 0.031$ | 0.224<br>$\pm 0.027$ | 0.140<br>$\pm 0.005$  | 0.190<br>$\pm 0.040$  | 0.219<br>$\pm 0.018$ | 0.198<br>$\pm 0.042$ | 0.143<br>$\pm 0.043$  | <b>0.386</b><br>$\pm$ <b>0.054</b> | 0.171<br>$\pm 0.018$               | 0.405<br>$\pm 0.027$               | 0.190<br>$\pm 0.017$ | 0.369<br>$\pm 0.058$               | 0.200<br>$\pm 0.040$               |

Continued on next page

| SubjectMetric |          | DeepConvnet     | EEGNet          | Conformer       | CTNet                          | BIOT (f)        | BIOT (l)         | BENDR (f)       | BENDR (l)       | CBraMod (f)     | CBraMod (l)      | EEGPT (f)       | EEGPT (l)       | LaBraM (f)      | LaBraM (l)       | STEEGformer-s (f)              | STEEGformer-s (l) | STEEGformer-b (f)              | STEEGformer-b (l) | STEEGformer-h (f)              | STEEGformer-h (l) |
|---------------|----------|-----------------|-----------------|-----------------|--------------------------------|-----------------|------------------|-----------------|-----------------|-----------------|------------------|-----------------|-----------------|-----------------|------------------|--------------------------------|-------------------|--------------------------------|-------------------|--------------------------------|-------------------|
| sub12         | Acc.2    | 0.471<br>±0.043 | 0.545<br>±0.033 | 0.540<br>±0.076 | 0.531<br>±0.055                | 0.360<br>±0.044 | 0.326<br>±0.027  | 0.433<br>±0.078 | 0.271<br>±0.045 | 0.352<br>±0.043 | 0.281<br>±0.022  | 0.357<br>±0.027 | 0.383<br>±0.031 | 0.343<br>±0.050 | 0.319<br>±0.037  | 0.614<br>±0.040                | 0.338<br>±0.055   | <b>0.624</b><br>± <b>0.032</b> | 0.357<br>±0.035   | 0.648<br>± 0.070               | 0.336<br>±0.059   |
|               | $\kappa$ | 0.211<br>±0.050 | 0.178<br>±0.051 | 0.167<br>±0.079 | 0.214<br>±0.033                | 0.042<br>±0.052 | 0.036<br>±0.038  | 0.175<br>±0.063 | 0.042<br>±0.014 | 0.147<br>±0.045 | -0.025<br>±0.045 | 0.072<br>±0.032 | 0.183<br>±0.050 | 0.053<br>±0.059 | 0.006<br>±0.038  | <b>0.328</b><br>± <b>0.046</b> | 0.083<br>±0.044   | 0.325<br>±0.038                | 0.094<br>±0.030   | 0.344<br>± 0.055               | 0.117<br>±0.065   |
|               | AUC      | 0.735<br>±0.022 | 0.712<br>±0.026 | 0.683<br>±0.038 | 0.740<br>±0.037                | 0.545<br>±0.024 | 0.547<br>±0.047  | 0.667<br>±0.030 | 0.547<br>±0.030 | 0.639<br>±0.029 | 0.459<br>±0.035  | 0.586<br>±0.019 | 0.677<br>±0.013 | 0.553<br>±0.082 | 0.496<br>±0.032  | 0.599<br>±0.025                | 0.748<br>±0.026   | 0.599<br>±0.032                | 0.603<br>±0.021   | <b>0.753</b><br>± <b>0.040</b> | 0.624<br>±0.036   |
|               | BAcc     | 0.324<br>±0.043 | 0.295<br>±0.044 | 0.286<br>±0.068 | 0.326<br>±0.029                | 0.179<br>±0.045 | 0.174<br>±0.032  | 0.293<br>±0.054 | 0.179<br>±0.012 | 0.269<br>±0.038 | 0.121<br>±0.039  | 0.205<br>±0.027 | 0.300<br>±0.043 | 0.188<br>±0.050 | 0.148<br>±0.032  | <b>0.424</b><br>± <b>0.039</b> | 0.214<br>±0.038   | 0.421<br>±0.032                | 0.224<br>±0.026   | 0.438<br>± 0.047               | 0.243<br>±0.056   |
|               | Acc.1    | 0.326<br>±0.047 | 0.295<br>±0.044 | 0.286<br>±0.068 | 0.326<br>±0.029                | 0.179<br>±0.045 | 0.174<br>±0.032  | 0.293<br>±0.054 | 0.179<br>±0.012 | 0.269<br>±0.038 | 0.119<br>±0.037  | 0.205<br>±0.027 | 0.300<br>±0.043 | 0.183<br>±0.056 | 0.148<br>±0.032  | <b>0.424</b><br>± <b>0.039</b> | 0.214<br>±0.038   | 0.421<br>±0.032                | 0.224<br>±0.026   | 0.431<br>± 0.045               | 0.243<br>±0.056   |
|               | Acc.2    | 0.531<br>±0.047 | 0.507<br>±0.060 | 0.488<br>±0.022 | 0.564<br>±0.040                | 0.350<br>±0.018 | 0.345<br>±0.053  | 0.490<br>±0.067 | 0.340<br>±0.042 | 0.452<br>±0.048 | 0.238<br>±0.061  | 0.388<br>±0.050 | 0.512<br>±0.059 | 0.352<br>±0.091 | 0.286<br>±0.058  | 0.610<br>±0.042                | 0.376<br>±0.055   | <b>0.645</b><br>± <b>0.075</b> | 0.405<br>±0.035   | 0.679<br>± 0.041               | 0.424<br>±0.053   |
| sub13         | $\kappa$ | 0.242<br>±0.069 | 0.208<br>±0.039 | 0.208<br>±0.045 | 0.203<br>±0.059                | 0.058<br>±0.055 | -0.025<br>±0.021 | 0.172<br>±0.080 | 0.053<br>±0.046 | 0.011<br>±0.025 | -0.003<br>±0.006 | 0.022<br>±0.063 | 0.131<br>±0.088 | 0.019<br>±0.049 | -0.011<br>±0.082 | <b>0.303</b><br>± <b>0.095</b> | -0.014<br>±0.031  | 0.294<br>±0.090                | 0.000<br>±0.033   | 0.361<br>± 0.131               | -0.017<br>±0.030  |
|               | AUC      | 0.733<br>±0.034 | 0.739<br>±0.024 | 0.736<br>±0.038 | <b>0.740</b><br>± <b>0.020</b> | 0.530<br>±0.024 | 0.470<br>±0.034  | 0.684<br>±0.028 | 0.585<br>±0.032 | 0.516<br>±0.014 | 0.455<br>±0.041  | 0.546<br>±0.023 | 0.657<br>±0.040 | 0.535<br>±0.077 | 0.484<br>±0.051  | 0.736<br>±0.048                | 0.535<br>±0.037   | 0.726<br>±0.034                | 0.524<br>±0.028   | 0.781<br>± 0.065               | 0.539<br>±0.051   |
|               | BAcc     | 0.350<br>±0.059 | 0.321<br>±0.034 | 0.321<br>±0.039 | 0.317<br>±0.051                | 0.193<br>±0.047 | 0.121<br>±0.018  | 0.290<br>±0.068 | 0.188<br>±0.040 | 0.152<br>±0.021 | 0.140<br>±0.005  | 0.162<br>±0.054 | 0.255<br>±0.076 | 0.160<br>±0.042 | 0.133<br>±0.070  | <b>0.402</b><br>± <b>0.081</b> | 0.131<br>±0.027   | 0.395<br>±0.077                | 0.143<br>±0.028   | 0.452<br>± 0.112               | 0.129<br>±0.026   |
|               | Acc.1    | 0.352<br>±0.063 | 0.321<br>±0.034 | 0.324<br>±0.042 | 0.317<br>±0.051                | 0.193<br>±0.047 | 0.121<br>±0.018  | 0.290<br>±0.068 | 0.188<br>±0.040 | 0.152<br>±0.021 | 0.140<br>±0.005  | 0.162<br>±0.054 | 0.255<br>±0.076 | 0.157<br>±0.044 | 0.133<br>±0.070  | <b>0.402</b><br>± <b>0.081</b> | 0.131<br>±0.027   | 0.395<br>±0.077                | 0.143<br>±0.028   | 0.458<br>± 0.114               | 0.129<br>±0.026   |
|               | Acc.2    | 0.548<br>±0.069 | 0.529<br>±0.043 | 0.531<br>±0.047 | 0.540<br>±0.059                | 0.338<br>±0.047 | 0.257<br>±0.034  | 0.476<br>±0.048 | 0.374<br>±0.056 | 0.302<br>±0.040 | 0.293<br>±0.018  | 0.331<br>±0.053 | 0.460<br>±0.027 | 0.324<br>±0.062 | 0.255<br>±0.081  | <b>0.610</b><br>± <b>0.051</b> | 0.298<br>±0.036   | 0.583<br>±0.040                | 0.293<br>±0.018   | 0.699<br>± 0.100               | 0.286<br>±0.039   |
|               | $\kappa$ | 0.258<br>±0.029 | 0.289<br>±0.081 | 0.258<br>±0.059 | 0.311<br>±0.029                | 0.161<br>±0.054 | 0.003<br>±0.006  | 0.214<br>±0.049 | 0.042<br>±0.033 | 0.089<br>±0.059 | -0.006<br>±0.012 | 0.072<br>±0.062 | 0.189<br>±0.036 | 0.036<br>±0.053 | -0.006<br>±0.022 | 0.336<br>±0.037                | 0.075<br>±0.051   | <b>0.347</b><br>± <b>0.069</b> | 0.069<br>±0.029   | 0.375<br>± 0.036               | 0.075<br>±0.040   |
| sub14         | AUC      | 0.783<br>±0.010 | 0.782<br>±0.028 | 0.769<br>±0.033 | 0.802<br>± 0.022               | 0.622<br>±0.018 | 0.549<br>±0.030  | 0.709<br>±0.030 | 0.567<br>±0.045 | 0.571<br>±0.036 | 0.507<br>±0.062  | 0.580<br>±0.049 | 0.665<br>±0.026 | 0.579<br>±0.079 | 0.465<br>±0.055  | 0.758<br>±0.020                | 0.601<br>±0.053   | 0.775<br>±0.036                | 0.588<br>±0.037   | <b>0.790</b><br>± <b>0.013</b> | 0.598<br>±0.041   |
|               | BAcc     | 0.364<br>±0.025 | 0.390<br>±0.070 | 0.364<br>±0.051 | 0.410<br>±0.025                | 0.281<br>±0.047 | 0.145<br>±0.005  | 0.326<br>±0.042 | 0.179<br>±0.028 | 0.219<br>±0.051 | 0.138<br>±0.011  | 0.205<br>±0.054 | 0.305<br>±0.031 | 0.174<br>±0.045 | 0.138<br>±0.019  | 0.431<br>±0.032                | 0.207<br>±0.043   | <b>0.440</b><br>± <b>0.059</b> | 0.202<br>±0.025   | 0.464<br>± 0.031               | 0.207<br>±0.034   |
|               | Acc.1    | 0.364<br>±0.025 | 0.388<br>±0.075 | 0.364<br>±0.051 | 0.410<br>±0.025                | 0.281<br>±0.047 | 0.145<br>±0.005  | 0.326<br>±0.042 | 0.179<br>±0.028 | 0.219<br>±0.051 | 0.143<br>±0.000  | 0.205<br>±0.054 | 0.305<br>±0.031 | 0.186<br>±0.036 | 0.143<br>±0.025  | 0.431<br>±0.032                | 0.205<br>±0.046   | <b>0.440</b><br>± <b>0.059</b> | 0.202<br>±0.025   | 0.466<br>± 0.021               | 0.205<br>±0.032   |
|               | Acc.2    | 0.531<br>±0.047 | 0.507<br>±0.060 | 0.488<br>±0.022 | 0.564<br>±0.040                | 0.350<br>±0.018 | 0.345<br>±0.053  | 0.490<br>±0.067 | 0.340<br>±0.042 | 0.452<br>±0.048 | 0.238<br>±0.061  | 0.388<br>±0.050 | 0.512<br>±0.059 | 0.352<br>±0.091 | 0.286<br>±0.058  | 0.610<br>±0.042                | 0.376<br>±0.055   | <b>0.645</b><br>± <b>0.075</b> | 0.405<br>±0.035   | 0.679<br>± 0.041               | 0.424<br>±0.053   |

Continued on next page

| Subject | Metric   | DeepConvnet     | EEGNet          | Conformer       | CTNet           | BIOT (f)        | BIOT (l)        | BENDR (f)       | BENDR (l)       | CBraMod (f)     | CBraMod (l)      | EEGPT (f)       | EEGPT (l)       | LaBraM (f)      | LaBraM (l)       | STEEGformer-s (f) | STEEGformer-s (l) | STEEGformer-b (f) | STEEGformer-b (l) | STEEGformer-h (f) | STEEGformer-h (l) |
|---------|----------|-----------------|-----------------|-----------------|-----------------|-----------------|-----------------|-----------------|-----------------|-----------------|------------------|-----------------|-----------------|-----------------|------------------|-------------------|-------------------|-------------------|-------------------|-------------------|-------------------|
|         |          | 0.564<br>±0.042 | 0.631<br>±0.040 | 0.586<br>±0.047 | 0.629<br>±0.073 | 0.460<br>±0.027 | 0.310<br>±0.024 | 0.540<br>±0.063 | 0.345<br>±0.060 | 0.362<br>±0.040 | 0.276<br>±0.021  | 0.362<br>±0.059 | 0.450<br>±0.042 | 0.338<br>±0.067 | 0.276<br>±0.034  | 0.638<br>±0.018   | 0.371<br>±0.049   | 0.648<br>±0.060   | 0.340<br>±0.043   | 0.681<br>±0.048   | 0.369<br>±0.051   |
| sub15   | $\kappa$ | 0.264<br>±0.047 | 0.194<br>±0.044 | 0.239<br>±0.068 | 0.261<br>±0.060 | 0.072<br>±0.023 | 0.006<br>±0.025 | 0.144<br>±0.036 | 0.050<br>±0.060 | 0.133<br>±0.042 | -0.006<br>±0.029 | 0.072<br>±0.025 | 0.164<br>±0.032 | 0.011<br>±0.031 | 0.019<br>±0.030  | 0.244<br>±0.059   | 0.031<br>±0.028   | 0.281<br>±0.060   | 0.078<br>±0.055   | 0.392<br>±0.049   | 0.092<br>±0.036   |
|         | AUC      | 0.762<br>±0.025 | 0.743<br>±0.029 | 0.720<br>±0.046 | 0.757<br>±0.009 | 0.563<br>±0.026 | 0.536<br>±0.018 | 0.651<br>±0.036 | 0.563<br>±0.027 | 0.618<br>±0.023 | 0.489<br>±0.022  | 0.574<br>±0.026 | 0.670<br>±0.029 | 0.573<br>±0.063 | 0.493<br>±0.038  | 0.714<br>±0.039   | 0.561<br>±0.023   | 0.734<br>±0.036   | 0.570<br>±0.041   | 0.772<br>±0.028   | 0.586<br>±0.014   |
|         | BACc     | 0.369<br>±0.040 | 0.310<br>±0.038 | 0.348<br>±0.059 | 0.367<br>±0.051 | 0.205<br>±0.020 | 0.148<br>±0.022 | 0.267<br>±0.031 | 0.186<br>±0.052 | 0.257<br>±0.036 | 0.138<br>±0.025  | 0.205<br>±0.021 | 0.283<br>±0.027 | 0.152<br>±0.027 | 0.160<br>±0.026  | 0.352<br>±0.050   | 0.169<br>±0.024   | 0.383<br>±0.051   | 0.210<br>±0.047   | 0.479<br>±0.042   | 0.221<br>±0.031   |
|         | Acc.1    | 0.369<br>±0.040 | 0.310<br>±0.038 | 0.348<br>±0.059 | 0.367<br>±0.051 | 0.205<br>±0.020 | 0.148<br>±0.022 | 0.267<br>±0.031 | 0.186<br>±0.052 | 0.257<br>±0.036 | 0.150<br>±0.007  | 0.205<br>±0.021 | 0.283<br>±0.027 | 0.148<br>±0.023 | 0.162<br>±0.030  | 0.352<br>±0.050   | 0.171<br>±0.027   | 0.383<br>±0.051   | 0.210<br>±0.047   | 0.476<br>±0.036   | 0.219<br>±0.029   |
|         | Acc.2    | 0.593<br>±0.016 | 0.540<br>±0.054 | 0.533<br>±0.057 | 0.595<br>±0.060 | 0.355<br>±0.042 | 0.264<br>±0.016 | 0.457<br>±0.077 | 0.352<br>±0.057 | 0.436<br>±0.022 | 0.276<br>±0.010  | 0.362<br>±0.045 | 0.490<br>±0.039 | 0.336<br>±0.060 | 0.302<br>±0.019  | 0.595<br>±0.047   | 0.350<br>±0.063   | 0.619<br>±0.083   | 0.367<br>±0.060   | 0.707<br>±0.036   | 0.393<br>±0.029   |
|         | $\kappa$ | 0.247<br>±0.057 | 0.261<br>±0.075 | 0.200<br>±0.063 | 0.231<br>±0.053 | 0.097<br>±0.043 | 0.019<br>±0.038 | 0.158<br>±0.069 | 0.000<br>±0.035 | 0.081<br>±0.065 | 0.000<br>±0.017  | 0.069<br>±0.049 | 0.164<br>±0.030 | 0.056<br>±0.074 | -0.025<br>±0.041 | 0.322<br>±0.048   | 0.069<br>±0.035   | 0.300<br>±0.066   | 0.058<br>±0.042   | 0.392<br>±0.047   | 0.114<br>±0.039   |
| sub2    | AUC      | 0.746<br>±0.025 | 0.736<br>±0.035 | 0.712<br>±0.037 | 0.755<br>±0.022 | 0.607<br>±0.033 | 0.589<br>±0.034 | 0.639<br>±0.050 | 0.515<br>±0.014 | 0.573<br>±0.051 | 0.491<br>±0.028  | 0.581<br>±0.031 | 0.664<br>±0.038 | 0.541<br>±0.075 | 0.507<br>±0.034  | 0.734<br>±0.034   | 0.570<br>±0.028   | 0.742<br>±0.033   | 0.596<br>±0.029   | 0.783<br>±0.023   | 0.611<br>±0.047   |
|         | BACc     | 0.355<br>±0.049 | 0.367<br>±0.064 | 0.314<br>±0.054 | 0.340<br>±0.046 | 0.226<br>±0.037 | 0.160<br>±0.032 | 0.279<br>±0.059 | 0.143<br>±0.030 | 0.212<br>±0.056 | 0.143<br>±0.015  | 0.202<br>±0.042 | 0.283<br>±0.026 | 0.190<br>±0.063 | 0.121<br>±0.035  | 0.419<br>±0.041   | 0.202<br>±0.030   | 0.400<br>±0.056   | 0.193<br>±0.036   | 0.479<br>±0.041   | 0.240<br>±0.033   |
|         | Acc.1    | 0.355<br>±0.049 | 0.367<br>±0.064 | 0.314<br>±0.054 | 0.343<br>±0.049 | 0.226<br>±0.037 | 0.160<br>±0.032 | 0.281<br>±0.059 | 0.143<br>±0.030 | 0.212<br>±0.056 | 0.143<br>±0.022  | 0.202<br>±0.042 | 0.283<br>±0.026 | 0.193<br>±0.063 | 0.126<br>±0.029  | 0.419<br>±0.041   | 0.205<br>±0.031   | 0.400<br>±0.056   | 0.193<br>±0.036   | 0.476<br>±0.034   | 0.238<br>±0.030   |
|         | Acc.2    | 0.562<br>±0.060 | 0.588<br>±0.038 | 0.538<br>±0.057 | 0.574<br>±0.051 | 0.395<br>±0.070 | 0.295<br>±0.064 | 0.421<br>±0.063 | 0.302<br>±0.027 | 0.352<br>±0.068 | 0.274<br>±0.012  | 0.360<br>±0.055 | 0.457<br>±0.034 | 0.324<br>±0.061 | 0.290<br>±0.055  | 0.605<br>±0.057   | 0.352<br>±0.032   | 0.624<br>±0.042   | 0.376<br>±0.037   | 0.685<br>±0.046   | 0.400<br>±0.056   |
|         | $\kappa$ | 0.653<br>±0.079 | 0.600<br>±0.060 | 0.689<br>±0.069 | 0.581<br>±0.101 | 0.183<br>±0.057 | 0.033<br>±0.036 | 0.386<br>±0.058 | 0.094<br>±0.036 | 0.431<br>±0.054 | 0.008<br>±0.019  | 0.283<br>±0.067 | 0.281<br>±0.027 | 0.072<br>±0.066 | -0.014<br>±0.023 | 0.892<br>±0.033   | 0.239<br>±0.051   | 0.919<br>±0.015   | 0.281<br>±0.032   | 0.948<br>±0.017   | 0.272<br>±0.038   |
|         | AUC      | 0.939<br>±0.010 | 0.928<br>±0.012 | 0.938<br>±0.021 | 0.938<br>±0.012 | 0.652<br>±0.024 | 0.554<br>±0.020 | 0.820<br>±0.021 | 0.596<br>±0.014 | 0.836<br>±0.018 | 0.500<br>±0.020  | 0.726<br>±0.046 | 0.777<br>±0.016 | 0.604<br>±0.103 | 0.508<br>±0.021  | 0.984<br>±0.010   | 0.759<br>±0.026   | 0.991<br>±0.005   | 0.812<br>±0.025   | 0.996<br>±0.004   | 0.812<br>±0.028   |
| sub3    | BACc     | 0.702<br>±0.068 | 0.657<br>±0.051 | 0.733<br>±0.059 | 0.640<br>±0.087 | 0.300<br>±0.049 | 0.171<br>±0.031 | 0.474<br>±0.050 | 0.224<br>±0.031 | 0.512<br>±0.046 | 0.150<br>±0.016  | 0.386<br>±0.057 | 0.383<br>±0.023 | 0.205<br>±0.057 | 0.131<br>±0.019  | 0.907<br>±0.028   | 0.348<br>±0.044   | 0.931<br>±0.013   | 0.383<br>±0.027   | 0.955<br>±0.015   | 0.376<br>±0.032   |
|         | Acc.1    | 0.702<br>±0.068 | 0.657<br>±0.051 | 0.733<br>±0.059 | 0.640<br>±0.087 | 0.300<br>±0.049 | 0.171<br>±0.031 | 0.474<br>±0.050 | 0.224<br>±0.031 | 0.512<br>±0.046 | 0.145<br>±0.013  | 0.386<br>±0.057 | 0.383<br>±0.023 | 0.207<br>±0.058 | 0.131<br>±0.021  | 0.907<br>±0.028   | 0.348<br>±0.044   | 0.931<br>±0.013   | 0.386<br>±0.027   | 0.952<br>±0.016   | 0.376<br>±0.032   |

Continued on next page

| SubjectMetric |          | DeepConvnet     | EEGNet          | Conformer       | CTNet                          | BIOT (f)        | BIOT (l)        | BENDR (f)       | BENDR (l)       | CBraMod (f)     | CBraMod (l)      | EEGPT (f)       | EEGPT (l)       | LaBraM (f)      | LaBraM (l)      | STEEGformer-s (f)              | STEEGformer-s (l) | STEEGformer-b (f) | STEEGformer-b (l) | STEEGformer-l (f)              | STEEGformer-l (l) |
|---------------|----------|-----------------|-----------------|-----------------|--------------------------------|-----------------|-----------------|-----------------|-----------------|-----------------|------------------|-----------------|-----------------|-----------------|-----------------|--------------------------------|-------------------|-------------------|-------------------|--------------------------------|-------------------|
| sub4          | Acc.2    | 0.867<br>±0.026 | 0.833<br>±0.056 | 0.874<br>±0.032 | 0.840<br>±0.043                | 0.474<br>±0.043 | 0.336<br>±0.034 | 0.664<br>±0.039 | 0.388<br>±0.052 | 0.743<br>±0.045 | 0.295<br>±0.016  | 0.560<br>±0.049 | 0.610<br>±0.026 | 0.398<br>±0.118 | 0.298<br>±0.021 | 0.976<br>±0.022                | 0.514<br>±0.042   | 0.983<br>±0.007   | 0.629<br>±0.064   | <b>0.979</b><br>± <b>0.013</b> | 0.586<br>±0.054   |
|               | $\kappa$ | 0.611<br>±0.040 | 0.589<br>±0.045 | 0.686<br>±0.041 | 0.631<br>±0.041                | 0.394<br>±0.042 | 0.000<br>±0.000 | 0.403<br>±0.097 | 0.069<br>±0.038 | 0.544<br>±0.030 | 0.003<br>±0.006  | 0.408<br>±0.036 | 0.464<br>±0.066 | 0.039<br>±0.054 | 0.006<br>±0.024 | 0.883<br>±0.041                | 0.281<br>±0.087   | 0.869<br>±0.027   | 0.294<br>±0.054   | <b>0.878</b><br>± <b>0.029</b> | 0.317<br>±0.049   |
|               | AUC      | 0.933<br>±0.009 | 0.934<br>±0.010 | 0.937<br>±0.004 | 0.931<br>±0.008                | 0.791<br>±0.027 | 0.598<br>±0.065 | 0.800<br>±0.037 | 0.584<br>±0.040 | 0.898<br>±0.021 | 0.505<br>±0.030  | 0.807<br>±0.021 | 0.869<br>±0.018 | 0.573<br>±0.094 | 0.501<br>±0.043 | <b>0.985</b><br>± <b>0.011</b> | 0.762<br>±0.037   | 0.979<br>±0.008   | 0.802<br>±0.023   | 0.988<br>±0.007                | 0.789<br>±0.037   |
|               | BACc     | 0.667<br>±0.035 | 0.648<br>±0.038 | 0.731<br>±0.035 | 0.683<br>±0.035                | 0.481<br>±0.036 | 0.143<br>±0.000 | 0.488<br>±0.083 | 0.202<br>±0.033 | 0.610<br>±0.026 | 0.145<br>±0.005  | 0.493<br>±0.031 | 0.540<br>±0.056 | 0.176<br>±0.046 | 0.148<br>±0.020 | 0.900<br>±0.035                | 0.383<br>±0.075   | 0.888<br>±0.023   | 0.395<br>±0.046   | <b>0.896</b><br>± <b>0.025</b> | 0.414<br>±0.042   |
|               | Acc.1    | 0.664<br>±0.033 | 0.648<br>±0.038 | 0.731<br>±0.035 | 0.683<br>±0.035                | 0.481<br>±0.036 | 0.143<br>±0.000 | 0.488<br>±0.083 | 0.202<br>±0.033 | 0.610<br>±0.026 | 0.145<br>±0.005  | 0.493<br>±0.031 | 0.540<br>±0.056 | 0.176<br>±0.044 | 0.148<br>±0.020 | <b>0.900</b><br>± <b>0.035</b> | 0.381<br>±0.077   | 0.888<br>±0.023   | 0.395<br>±0.046   | 0.903<br>±0.016                | 0.414<br>±0.042   |
|               | Acc.2    | 0.831<br>±0.026 | 0.812<br>±0.016 | 0.864<br>±0.041 | 0.819<br>±0.033                | 0.636<br>±0.052 | 0.283<br>±0.005 | 0.631<br>±0.083 | 0.374<br>±0.039 | 0.829<br>±0.053 | 0.286<br>±0.000  | 0.640<br>±0.065 | 0.750<br>±0.038 | 0.367<br>±0.105 | 0.283<br>±0.041 | <b>0.976</b><br>± <b>0.028</b> | 0.552<br>±0.071   | 0.971<br>±0.014   | 0.595<br>±0.042   | 0.987<br>±0.010                | 0.638<br>±0.054   |
|               | $\kappa$ | 0.300<br>±0.027 | 0.233<br>±0.045 | 0.244<br>±0.029 | 0.278<br>±0.017                | 0.069<br>±0.060 | 0.014<br>±0.040 | 0.194<br>±0.067 | 0.058<br>±0.042 | 0.083<br>±0.026 | 0.006<br>±0.029  | 0.081<br>±0.051 | 0.178<br>±0.088 | 0.042<br>±0.056 | 0.022<br>±0.024 | <b>0.344</b><br>± <b>0.039</b> | 0.033<br>±0.030   | 0.319<br>±0.064   | 0.067<br>±0.046   | 0.385<br>±0.081                | 0.092<br>±0.058   |
| sub5          | AUC      | 0.788<br>±0.016 | 0.760<br>±0.031 | 0.746<br>±0.027 | <b>0.776</b><br>± <b>0.033</b> | 0.554<br>±0.034 | 0.519<br>±0.042 | 0.675<br>±0.057 | 0.564<br>±0.024 | 0.567<br>±0.030 | 0.454<br>±0.043  | 0.606<br>±0.055 | 0.678<br>±0.023 | 0.555<br>±0.061 | 0.501<br>±0.026 | 0.773<br>±0.039                | 0.594<br>±0.048   | 0.749<br>±0.028   | 0.601<br>±0.048   | 0.772<br>±0.050                | 0.604<br>±0.043   |
|               | BACc     | 0.400<br>±0.023 | 0.343<br>±0.039 | 0.352<br>±0.025 | 0.381<br>±0.015                | 0.202<br>±0.051 | 0.155<br>±0.035 | 0.310<br>±0.058 | 0.193<br>±0.036 | 0.214<br>±0.022 | 0.148<br>±0.025  | 0.212<br>±0.044 | 0.295<br>±0.075 | 0.179<br>±0.048 | 0.162<br>±0.020 | <b>0.438</b><br>± <b>0.033</b> | 0.171<br>±0.026   | 0.417<br>±0.055   | 0.200<br>±0.040   | 0.473<br>±0.070                | 0.221<br>±0.050   |
|               | Acc.1    | 0.400<br>±0.023 | 0.343<br>±0.039 | 0.352<br>±0.025 | 0.381<br>±0.015                | 0.202<br>±0.051 | 0.155<br>±0.035 | 0.310<br>±0.058 | 0.193<br>±0.036 | 0.214<br>±0.022 | 0.145<br>±0.005  | 0.212<br>±0.044 | 0.295<br>±0.075 | 0.181<br>±0.046 | 0.162<br>±0.020 | <b>0.438</b><br>± <b>0.033</b> | 0.171<br>±0.026   | 0.417<br>±0.055   | 0.198<br>±0.043   | 0.487<br>±0.077                | 0.221<br>±0.050   |
|               | Acc.2    | 0.624<br>±0.027 | 0.574<br>±0.055 | 0.581<br>±0.021 | 0.619<br>±0.038                | 0.362<br>±0.042 | 0.317<br>±0.032 | 0.505<br>±0.111 | 0.343<br>±0.053 | 0.374<br>±0.042 | 0.257<br>±0.020  | 0.405<br>±0.079 | 0.490<br>±0.053 | 0.348<br>±0.081 | 0.293<br>±0.019 | 0.695<br>±0.070                | 0.362<br>±0.072   | 0.624<br>±0.048   | 0.398<br>±0.087   | <b>0.679</b><br>± <b>0.052</b> | 0.395<br>±0.084   |
|               | $\kappa$ | 0.306<br>±0.024 | 0.269<br>±0.053 | 0.294<br>±0.072 | 0.319<br>±0.026                | 0.161<br>±0.021 | 0.006<br>±0.061 | 0.192<br>±0.051 | 0.067<br>±0.043 | 0.178<br>±0.043 | -0.003<br>±0.025 | 0.086<br>±0.043 | 0.192<br>±0.066 | 0.036<br>±0.049 | 0.014<br>±0.032 | 0.553<br>±0.030                | 0.153<br>±0.049   | 0.589<br>±0.064   | 0.158<br>±0.016   | <b>0.562</b><br>± <b>0.029</b> | 0.164<br>±0.045   |
| sub6          | AUC      | 0.806<br>±0.019 | 0.764<br>±0.033 | 0.773<br>±0.020 | 0.802<br>±0.012                | 0.632<br>±0.022 | 0.534<br>±0.043 | 0.686<br>±0.040 | 0.588<br>±0.040 | 0.669<br>±0.028 | 0.455<br>±0.036  | 0.575<br>±0.012 | 0.680<br>±0.044 | 0.566<br>±0.108 | 0.527<br>±0.028 | 0.875<br>±0.004                | 0.663<br>±0.034   | 0.915<br>±0.016   | 0.673<br>±0.041   | <b>0.876</b><br>± <b>0.015</b> | 0.675<br>±0.039   |
|               | BACc     | 0.405<br>±0.021 | 0.374<br>±0.045 | 0.395<br>±0.062 | 0.417<br>±0.022                | 0.281<br>±0.018 | 0.148<br>±0.052 | 0.307<br>±0.044 | 0.200<br>±0.037 | 0.295<br>±0.037 | 0.140<br>±0.021  | 0.217<br>±0.037 | 0.307<br>±0.057 | 0.174<br>±0.042 | 0.155<br>±0.027 | 0.617<br>±0.026                | 0.274<br>±0.042   | 0.648<br>±0.055   | 0.279<br>±0.014   | <b>0.625</b><br>± <b>0.025</b> | 0.283<br>±0.039   |
|               | Acc.1    | 0.405<br>±0.021 | 0.374<br>±0.045 | 0.395<br>±0.062 | 0.417<br>±0.022                | 0.281<br>±0.018 | 0.148<br>±0.052 | 0.307<br>±0.044 | 0.200<br>±0.037 | 0.295<br>±0.037 | 0.133<br>±0.013  | 0.217<br>±0.037 | 0.307<br>±0.057 | 0.179<br>±0.039 | 0.155<br>±0.027 | 0.617<br>±0.026                | 0.274<br>±0.042   | 0.648<br>±0.055   | 0.279<br>±0.014   | <b>0.639</b><br>± <b>0.025</b> | 0.286<br>±0.039   |
|               | Acc.2    | 0.405<br>±0.021 | 0.374<br>±0.045 | 0.395<br>±0.062 | 0.417<br>±0.022                | 0.281<br>±0.018 | 0.148<br>±0.052 | 0.307<br>±0.044 | 0.200<br>±0.037 | 0.295<br>±0.037 | 0.133<br>±0.013  | 0.217<br>±0.037 | 0.307<br>±0.057 | 0.179<br>±0.039 | 0.155<br>±0.027 | 0.617<br>±0.026                | 0.274<br>±0.042   | 0.648<br>±0.055   | 0.279<br>±0.014   | <b>0.639</b><br>± <b>0.025</b> | 0.286<br>±0.039   |

Continued on next page



| Subject | Metric | DeepConvnet     | EEGNet          | Conformer       | CTNet           | BIOT (f)        | BIOT (l)         | BENDR (f)       | BENDR (l)        | CBraMod (f)     | CBraMod (l)      | EEGPT (f)       | EEGPT (l)       | LaBraM (f)      | LaBraM (l)       | STEEGformer-s (f) | STEEGformer-s (l) | STEEGformer-b (f) | STEEGformer-b (l) | STEEGformer-l (f) | STEEGformer-l (l) |
|---------|--------|-----------------|-----------------|-----------------|-----------------|-----------------|------------------|-----------------|------------------|-----------------|------------------|-----------------|-----------------|-----------------|------------------|-------------------|-------------------|-------------------|-------------------|-------------------|-------------------|
|         |        | Acc.2           | κ               | AUC             | BAcc            | Acc.1           | Acc.2            | κ               | AUC              | BAcc            | Acc.1            | Acc.2           | κ               | AUC             | BAcc             | Acc.1             | Acc.2             | κ                 | AUC               | BAcc              | Acc.1             |
| sub7    | κ      | 0.617<br>±0.049 | 0.581<br>±0.067 | 0.602<br>±0.068 | 0.598<br>±0.039 | 0.433<br>±0.057 | 0.283<br>±0.051  | 0.536<br>±0.065 | 0.379<br>±0.049  | 0.498<br>±0.037 | 0.257<br>±0.034  | 0.364<br>±0.042 | 0.507<br>±0.066 | 0.350<br>±0.073 | 0.283<br>±0.030  | 0.798<br>±0.037   | 0.438<br>±0.066   | 0.831<br>±0.026   | 0.426<br>±0.049   | 0.830<br>±0.046   | 0.445<br>±0.054   |
|         | κ      | 0.211<br>±0.033 | 0.244<br>±0.046 | 0.203<br>±0.045 | 0.253<br>±0.036 | 0.053<br>±0.040 | 0.017<br>±0.039  | 0.136<br>±0.018 | 0.061<br>±0.048  | 0.069<br>±0.028 | -0.011<br>±0.018 | 0.072<br>±0.030 | 0.100<br>±0.048 | 0.028<br>±0.040 | 0.017<br>±0.033  | 0.289<br>±0.059   | 0.069<br>±0.082   | 0.339<br>±0.071   | 0.069<br>±0.061   | 0.354<br>±0.099   | 0.072<br>±0.043   |
|         | AUC    | 0.760<br>±0.026 | 0.759<br>±0.017 | 0.702<br>±0.038 | 0.777<br>±0.023 | 0.550<br>±0.027 | 0.540<br>±0.038  | 0.632<br>±0.024 | 0.561<br>±0.024  | 0.558<br>±0.013 | 0.519<br>±0.033  | 0.593<br>±0.046 | 0.655<br>±0.034 | 0.548<br>±0.038 | 0.519<br>±0.035  | 0.747<br>±0.030   | 0.592<br>±0.041   | 0.769<br>±0.036   | 0.583<br>±0.031   | 0.757<br>±0.035   | 0.619<br>±0.035   |
|         | BAcc   | 0.324<br>±0.028 | 0.352<br>±0.039 | 0.317<br>±0.038 | 0.360<br>±0.031 | 0.188<br>±0.034 | 0.157<br>±0.033  | 0.260<br>±0.016 | 0.195<br>±0.041  | 0.202<br>±0.024 | 0.133<br>±0.016  | 0.205<br>±0.026 | 0.229<br>±0.041 | 0.167<br>±0.035 | 0.157<br>±0.028  | 0.390<br>±0.051   | 0.202<br>±0.070   | 0.433<br>±0.060   | 0.202<br>±0.053   | 0.446<br>±0.085   | 0.205<br>±0.037   |
|         | Acc.1  | 0.324<br>±0.028 | 0.352<br>±0.039 | 0.317<br>±0.038 | 0.360<br>±0.031 | 0.188<br>±0.034 | 0.157<br>±0.033  | 0.260<br>±0.016 | 0.195<br>±0.041  | 0.202<br>±0.024 | 0.140<br>±0.010  | 0.205<br>±0.026 | 0.229<br>±0.041 | 0.164<br>±0.037 | 0.157<br>±0.028  | 0.390<br>±0.051   | 0.202<br>±0.070   | 0.433<br>±0.060   | 0.202<br>±0.053   | 0.453<br>±0.078   | 0.202<br>±0.035   |
|         | Acc.2  | 0.593<br>±0.095 | 0.590<br>±0.035 | 0.550<br>±0.059 | 0.631<br>±0.035 | 0.352<br>±0.043 | 0.298<br>±0.040  | 0.426<br>±0.037 | 0.350<br>±0.026  | 0.376<br>±0.035 | 0.281<br>±0.014  | 0.376<br>±0.056 | 0.448<br>±0.038 | 0.333<br>±0.077 | 0.324<br>±0.018  | 0.621<br>±0.063   | 0.352<br>±0.073   | 0.638<br>±0.056   | 0.360<br>±0.067   | 0.649<br>±0.079   | 0.364<br>±0.065   |
| sub8    | κ      | 0.189<br>±0.084 | 0.169<br>±0.042 | 0.147<br>±0.053 | 0.175<br>±0.027 | 0.056<br>±0.055 | -0.011<br>±0.023 | 0.142<br>±0.083 | 0.019<br>±0.023  | 0.036<br>±0.041 | -0.017<br>±0.046 | 0.117<br>±0.025 | 0.081<br>±0.056 | 0.031<br>±0.034 | -0.033<br>±0.045 | 0.286<br>±0.023   | 0.011<br>±0.035   | 0.325<br>±0.047   | 0.022<br>±0.012   | 0.347<br>±0.070   | 0.028<br>±0.056   |
|         | AUC    | 0.736<br>±0.033 | 0.718<br>±0.035 | 0.696<br>±0.023 | 0.723<br>±0.033 | 0.554<br>±0.029 | 0.489<br>±0.036  | 0.636<br>±0.049 | 0.540<br>±0.017  | 0.567<br>±0.038 | 0.479<br>±0.054  | 0.586<br>±0.029 | 0.621<br>±0.034 | 0.572<br>±0.073 | 0.449<br>±0.049  | 0.736<br>±0.023   | 0.536<br>±0.006   | 0.738<br>±0.035   | 0.541<br>±0.034   | 0.753<br>±0.047   | 0.539<br>±0.021   |
|         | BAcc   | 0.305<br>±0.072 | 0.288<br>±0.036 | 0.269<br>±0.046 | 0.293<br>±0.023 | 0.190<br>±0.047 | 0.133<br>±0.020  | 0.264<br>±0.071 | 0.160<br>±0.020  | 0.174<br>±0.035 | 0.129<br>±0.040  | 0.243<br>±0.022 | 0.212<br>±0.048 | 0.169<br>±0.029 | 0.114<br>±0.039  | 0.388<br>±0.020   | 0.152<br>±0.030   | 0.421<br>±0.040   | 0.162<br>±0.011   | 0.440<br>±0.060   | 0.167<br>±0.048   |
|         | Acc.1  | 0.305<br>±0.072 | 0.288<br>±0.036 | 0.269<br>±0.046 | 0.293<br>±0.023 | 0.190<br>±0.047 | 0.133<br>±0.020  | 0.264<br>±0.071 | 0.160<br>±0.020  | 0.174<br>±0.035 | 0.119<br>±0.040  | 0.243<br>±0.022 | 0.212<br>±0.048 | 0.162<br>±0.036 | 0.117<br>±0.035  | 0.388<br>±0.020   | 0.152<br>±0.030   | 0.421<br>±0.040   | 0.162<br>±0.011   | 0.448<br>±0.057   | 0.167<br>±0.048   |
|         | Acc.2  | 0.526<br>±0.047 | 0.517<br>±0.043 | 0.493<br>±0.071 | 0.510<br>±0.051 | 0.360<br>±0.046 | 0.290<br>±0.026  | 0.419<br>±0.068 | 0.324<br>±0.038  | 0.348<br>±0.059 | 0.269<br>±0.051  | 0.379<br>±0.021 | 0.390<br>±0.081 | 0.336<br>±0.058 | 0.217<br>±0.047  | 0.621<br>±0.051   | 0.281<br>±0.045   | 0.612<br>±0.061   | 0.317<br>±0.034   | 0.644<br>±0.043   | 0.319<br>±0.023   |
| sub9    | κ      | 0.181<br>±0.063 | 0.139<br>±0.054 | 0.181<br>±0.039 | 0.186<br>±0.049 | 0.067<br>±0.021 | -0.022<br>±0.029 | 0.125<br>±0.048 | -0.003<br>±0.050 | 0.114<br>±0.039 | -0.028<br>±0.039 | 0.072<br>±0.042 | 0.119<br>±0.056 | 0.033<br>±0.033 | 0.003<br>±0.034  | 0.436<br>±0.046   | 0.072<br>±0.041   | 0.417<br>±0.071   | 0.050<br>±0.064   | 0.410<br>±0.027   | 0.050<br>±0.054   |
|         | AUC    | 0.722<br>±0.031 | 0.681<br>±0.033 | 0.675<br>±0.028 | 0.722<br>±0.022 | 0.568<br>±0.024 | 0.514<br>±0.040  | 0.634<br>±0.027 | 0.510<br>±0.025  | 0.604<br>±0.027 | 0.494<br>±0.063  | 0.586<br>±0.047 | 0.620<br>±0.027 | 0.520<br>±0.033 | 0.463<br>±0.024  | 0.814<br>±0.027   | 0.582<br>±0.033   | 0.808<br>±0.020   | 0.583<br>±0.030   | 0.804<br>±0.005   | 0.558<br>±0.033   |
|         | BAcc   | 0.298<br>±0.054 | 0.262<br>±0.046 | 0.298<br>±0.034 | 0.302<br>±0.042 | 0.200<br>±0.018 | 0.124<br>±0.025  | 0.250<br>±0.041 | 0.140<br>±0.043  | 0.240<br>±0.033 | 0.119<br>±0.034  | 0.205<br>±0.036 | 0.245<br>±0.048 | 0.171<br>±0.028 | 0.145<br>±0.029  | 0.517<br>±0.039   | 0.205<br>±0.035   | 0.500<br>±0.061   | 0.186<br>±0.055   | 0.494<br>±0.023   | 0.186<br>±0.047   |
|         | Acc.1  | 0.298<br>±0.054 | 0.264<br>±0.049 | 0.298<br>±0.034 | 0.302<br>±0.042 | 0.200<br>±0.018 | 0.124<br>±0.025  | 0.250<br>±0.041 | 0.140<br>±0.043  | 0.240<br>±0.033 | 0.124<br>±0.038  | 0.205<br>±0.036 | 0.245<br>±0.048 | 0.155<br>±0.033 | 0.143<br>±0.026  | 0.517<br>±0.039   | 0.205<br>±0.035   | 0.500<br>±0.061   | 0.186<br>±0.055   | 0.499<br>±0.028   | 0.186<br>±0.047   |
|         | Acc.2  | 0.298<br>±0.054 | 0.264<br>±0.049 | 0.298<br>±0.034 | 0.302<br>±0.042 | 0.200<br>±0.018 | 0.124<br>±0.025  | 0.250<br>±0.041 | 0.140<br>±0.043  | 0.240<br>±0.033 | 0.124<br>±0.038  | 0.205<br>±0.036 | 0.245<br>±0.048 | 0.155<br>±0.033 | 0.143<br>±0.026  | 0.517<br>±0.039   | 0.205<br>±0.035   | 0.500<br>±0.061   | 0.186<br>±0.055   | 0.499<br>±0.028   | 0.186<br>±0.047   |

Continued on next page

|               |                 |                 |                 |                 |                 |                 |                 |                 |                 |                 |                 |                 |                 |                 |                  |                  |                                |                  |                              |                  |
|---------------|-----------------|-----------------|-----------------|-----------------|-----------------|-----------------|-----------------|-----------------|-----------------|-----------------|-----------------|-----------------|-----------------|-----------------|------------------|------------------|--------------------------------|------------------|------------------------------|------------------|
| SubjectMetric | DeepConvnet     | EEGNet          | Conformer       | CTNet           | BIOT (f)        | BIOT (l)        | BENDR (f)       | BENDR (l)       | CBraMod (f)     | CBraMod (l)     | EEGPT (f)       | EEGPT (l)       | LaBraM (f)      | LaBraM (l)      | STEGformer-s (f) | STEGformer-s (l) | STEGformer-h (f)               | STEGformer-h (l) | STEGformer-l (f)             | STEGformer-l (l) |
|               | 0.502<br>±0.016 | 0.476<br>±0.051 | 0.495<br>±0.007 | 0.517<br>±0.018 | 0.367<br>±0.039 | 0.257<br>±0.030 | 0.436<br>±0.062 | 0.286<br>±0.057 | 0.431<br>±0.042 | 0.279<br>±0.066 | 0.390<br>±0.067 | 0.433<br>±0.054 | 0.295<br>±0.041 | 0.276<br>±0.044 | 0.688<br>±0.016  | 0.360<br>±0.055  | <b>0.707</b><br>± <b>0.040</b> | 0.345<br>±0.063  | <div>0.710<br/>± 0.055</div> | 0.319<br>±0.042  |

1575  
1576  
1577  
1578  
1579  
1580  
1581  
1582  
1583  
1584  
1585  
1586  
1587  
1588  
1589  
1590  
1591  
1592  
1593  
1594  
1595  
1596  
1597  
1598  
1599  
1600  
1601  
1602  
1603  
1604  
1605  
1606  
1607

## C.2 PER-SUBJECT RESULTS

## C.2.1 WITHIN-SUBJECT EVALUATION

Table 17: Average ‘‘Self’’ Performance Across All Subjects

| Model (Training strategy) | $\kappa$     | AUC          | BAcc         | Acc.1        | Acc.2        |
|---------------------------|--------------|--------------|--------------|--------------|--------------|
| DeepConvnet               | 0.269        | 0.745        | 0.373        | 0.373        | 0.583        |
|                           | $\pm 0.173$  | $\pm 0.087$  | $\pm 0.148$  | $\pm 0.148$  | $\pm 0.115$  |
| EEGNet                    | 0.278        | <b>0.740</b> | 0.381        | 0.381        | 0.581        |
|                           | $\pm 0.154$  | $\pm 0.086$  | $\pm 0.132$  | $\pm 0.132$  | $\pm 0.119$  |
| Conformer                 | 0.284        | 0.731        | 0.386        | 0.386        | 0.580        |
|                           | $\pm 0.174$  | $\pm 0.091$  | $\pm 0.149$  | $\pm 0.149$  | $\pm 0.125$  |
| CTNet                     | 0.264        | 0.726        | 0.369        | 0.369        | 0.559        |
|                           | $\pm 0.168$  | $\pm 0.093$  | $\pm 0.144$  | $\pm 0.143$  | $\pm 0.128$  |
| BIOT (f)                  | 0.116        | 0.590        | 0.242        | 0.242        | 0.407        |
|                           | $\pm 0.150$  | $\pm 0.091$  | $\pm 0.129$  | $\pm 0.129$  | $\pm 0.130$  |
| BIOT (l)                  | 0.016        | 0.538        | 0.157        | 0.157        | 0.308        |
|                           | $\pm 0.029$  | $\pm 0.043$  | $\pm 0.025$  | $\pm 0.025$  | $\pm 0.026$  |
| BENDR (f)                 | 0.168        | 0.649        | 0.287        | 0.287        | 0.462        |
|                           | $\pm 0.162$  | $\pm 0.103$  | $\pm 0.139$  | $\pm 0.139$  | $\pm 0.138$  |
| BENDR (l)                 | 0.039        | 0.547        | 0.177        | 0.177        | 0.342        |
|                           | $\pm 0.033$  | $\pm 0.034$  | $\pm 0.029$  | $\pm 0.028$  | $\pm 0.040$  |
| CBraMod (f)               | 0.070        | 0.551        | 0.203        | 0.203        | 0.363        |
|                           | $\pm 0.147$  | $\pm 0.126$  | $\pm 0.126$  | $\pm 0.126$  | $\pm 0.163$  |
| CBraMod (l)               | -0.029       | 0.459        | 0.118        | 0.117        | 0.252        |
|                           | $\pm 0.026$  | $\pm 0.034$  | $\pm 0.022$  | $\pm 0.022$  | $\pm 0.032$  |
| EEGPT (f)                 | 0.067        | 0.563        | 0.201        | 0.203        | 0.359        |
|                           | $\pm 0.098$  | $\pm 0.080$  | $\pm 0.084$  | $\pm 0.085$  | $\pm 0.101$  |
| EEGPT (l)                 | 0.090        | 0.586        | 0.220        | 0.222        | 0.385        |
|                           | $\pm 0.123$  | $\pm 0.095$  | $\pm 0.106$  | $\pm 0.108$  | $\pm 0.126$  |
| LaBraM (f)                | 0.004        | 0.499        | 0.146        | 0.145        | 0.293        |
|                           | $\pm 0.038$  | $\pm 0.037$  | $\pm 0.032$  | $\pm 0.032$  | $\pm 0.043$  |
| LaBraM (l)                | -0.013       | 0.474        | 0.132        | 0.131        | 0.259        |
|                           | $\pm 0.023$  | $\pm 0.028$  | $\pm 0.020$  | $\pm 0.019$  | $\pm 0.026$  |
| STEEGformer-s (f)         | <b>0.312</b> | 0.731        | <b>0.410</b> | <b>0.410</b> | <b>0.597</b> |
|                           | $\pm 0.232$  | $\pm 0.116$  | $\pm 0.199$  | $\pm 0.199$  | $\pm 0.169$  |
| STEEGformer-s (l)         | 0.077        | 0.584        | 0.209        | 0.210        | 0.377        |
|                           | $\pm 0.078$  | $\pm 0.078$  | $\pm 0.067$  | $\pm 0.067$  | $\pm 0.083$  |
| STEEGformer-b (f)         | 0.300        | 0.719        | 0.400        | 0.400        | 0.567        |
|                           | $\pm 0.250$  | $\pm 0.127$  | $\pm 0.214$  | $\pm 0.214$  | $\pm 0.183$  |
| STEEGformer-b (l)         | 0.090        | 0.592        | 0.220        | 0.220        | 0.386        |
|                           | $\pm 0.092$  | $\pm 0.089$  | $\pm 0.079$  | $\pm 0.079$  | $\pm 0.104$  |
| STEEGformer-l (f)         | 0.328        | 0.737        | 0.424        | 0.425        | 0.603        |
|                           | $\pm 0.235$  | $\pm 0.114$  | $\pm 0.201$  | $\pm 0.202$  | $\pm 0.169$  |
| STEEGformer-l (l)         | 0.085        | 0.598        | 0.215        | 0.216        | 0.386        |
|                           | $\pm 0.077$  | $\pm 0.076$  | $\pm 0.066$  | $\pm 0.066$  | $\pm 0.093$  |

Table 18: Per-Subject ‘‘Self’’ Performance (trained+tested on same subject)

| Subject | Metric   | DeepConvNet                 | EEGNet                      | Conformer                   | CTNet                       | BIOT (f)             | BIOT (l)             | BENDR (f)            | BENDR (l)            | CBraMod (f)           | CBraMod (l)           | EEGPT (f)            | EEGPT (l)            | LaBraM (f)            | LaBraM (l)            | STEEGformer-s (f)           | STEEGformer-s (l)    | STEEGformer-b (f)           | STEEGformer-b (l)    | STEEGformer-l (f)           | STEEGformer-l (l)    |
|---------|----------|-----------------------------|-----------------------------|-----------------------------|-----------------------------|----------------------|----------------------|----------------------|----------------------|-----------------------|-----------------------|----------------------|----------------------|-----------------------|-----------------------|-----------------------------|----------------------|-----------------------------|----------------------|-----------------------------|----------------------|
| sub1    | $\kappa$ | <b>0.247</b><br>$\pm 0.070$ | 0.253<br>$\pm 0.039$        | 0.239<br>$\pm 0.045$        | 0.233<br>$\pm 0.068$        | 0.047<br>$\pm 0.082$ | 0.011<br>$\pm 0.023$ | 0.111<br>$\pm 0.093$ | 0.011<br>$\pm 0.049$ | -0.006<br>$\pm 0.041$ | -0.008<br>$\pm 0.012$ | 0.069<br>$\pm 0.028$ | 0.039<br>$\pm 0.046$ | 0.022<br>$\pm 0.038$  | -0.008<br>$\pm 0.008$ | 0.214<br>$\pm 0.051$        | 0.056<br>$\pm 0.033$ | 0.181<br>$\pm 0.082$        | 0.047<br>$\pm 0.029$ | 0.219<br>$\pm 0.077$        | 0.036<br>$\pm 0.036$ |
|         | AUC      | 0.761<br>$\pm 0.033$        | <b>0.731</b><br>$\pm 0.015$ | 0.720<br>$\pm 0.025$        | 0.722<br>$\pm 0.029$        | 0.562<br>$\pm 0.069$ | 0.525<br>$\pm 0.027$ | 0.631<br>$\pm 0.020$ | 0.513<br>$\pm 0.062$ | 0.487<br>$\pm 0.022$  | 0.493<br>$\pm 0.028$  | 0.537<br>$\pm 0.025$ | 0.558<br>$\pm 0.045$ | 0.507<br>$\pm 0.012$  | 0.518<br>$\pm 0.029$  | 0.687<br>$\pm 0.017$        | 0.534<br>$\pm 0.027$ | 0.663<br>$\pm 0.043$        | 0.528<br>$\pm 0.026$ | 0.697<br>$\pm 0.030$        | 0.551<br>$\pm 0.030$ |
|         | BAcc     | <b>0.355</b><br>$\pm 0.060$ | 0.360<br>$\pm 0.033$        | 0.348<br>$\pm 0.039$        | 0.343<br>$\pm 0.058$        | 0.183<br>$\pm 0.070$ | 0.152<br>$\pm 0.020$ | 0.238<br>$\pm 0.079$ | 0.152<br>$\pm 0.042$ | 0.138<br>$\pm 0.035$  | 0.136<br>$\pm 0.011$  | 0.202<br>$\pm 0.024$ | 0.176<br>$\pm 0.040$ | 0.162<br>$\pm 0.032$  | 0.136<br>$\pm 0.007$  | 0.326<br>$\pm 0.043$        | 0.190<br>$\pm 0.028$ | 0.298<br>$\pm 0.070$        | 0.183<br>$\pm 0.025$ | 0.331<br>$\pm 0.066$        | 0.174<br>$\pm 0.031$ |
|         | Acc.1    | <b>0.355</b><br>$\pm 0.060$ | 0.360<br>$\pm 0.033$        | 0.348<br>$\pm 0.039$        | 0.345<br>$\pm 0.061$        | 0.183<br>$\pm 0.070$ | 0.152<br>$\pm 0.020$ | 0.238<br>$\pm 0.079$ | 0.152<br>$\pm 0.042$ | 0.138<br>$\pm 0.035$  | 0.136<br>$\pm 0.011$  | 0.205<br>$\pm 0.022$ | 0.177<br>$\pm 0.040$ | 0.150<br>$\pm 0.030$  | 0.133<br>$\pm 0.010$  | 0.326<br>$\pm 0.043$        | 0.190<br>$\pm 0.028$ | 0.298<br>$\pm 0.070$        | 0.183<br>$\pm 0.025$ | 0.336<br>$\pm 0.063$        | 0.174<br>$\pm 0.031$ |
|         | Acc.2    | 0.612<br>$\pm 0.070$        | 0.543<br>$\pm 0.026$        | 0.545<br>$\pm 0.053$        | <b>0.576</b><br>$\pm 0.043$ | 0.386<br>$\pm 0.093$ | 0.298<br>$\pm 0.035$ | 0.429<br>$\pm 0.074$ | 0.317<br>$\pm 0.076$ | 0.295<br>$\pm 0.027$  | 0.274<br>$\pm 0.012$  | 0.341<br>$\pm 0.055$ | 0.330<br>$\pm 0.071$ | 0.293<br>$\pm 0.023$  | 0.293<br>$\pm 0.016$  | 0.540<br>$\pm 0.020$        | 0.333<br>$\pm 0.037$ | 0.495<br>$\pm 0.063$        | 0.331<br>$\pm 0.045$ | 0.563<br>$\pm 0.052$        | 0.350<br>$\pm 0.032$ |
| sub10   | $\kappa$ | 0.272<br>$\pm 0.061$        | 0.328<br>$\pm 0.054$        | <b>0.306</b><br>$\pm 0.089$ | 0.289<br>$\pm 0.108$        | 0.053<br>$\pm 0.051$ | 0.033<br>$\pm 0.023$ | 0.214<br>$\pm 0.112$ | 0.056<br>$\pm 0.056$ | 0.075<br>$\pm 0.039$  | -0.017<br>$\pm 0.035$ | 0.081<br>$\pm 0.089$ | 0.069<br>$\pm 0.028$ | 0.075<br>$\pm 0.021$  | 0.025<br>$\pm 0.043$  | 0.247<br>$\pm 0.039$        | 0.042<br>$\pm 0.044$ | 0.219<br>$\pm 0.097$        | 0.056<br>$\pm 0.010$ | 0.281<br>$\pm 0.057$        | 0.081<br>$\pm 0.040$ |
|         | AUC      | <b>0.782</b><br>$\pm 0.018$ | 0.802<br>$\pm 0.021$        | <b>0.782</b><br>$\pm 0.026$ | 0.760<br>$\pm 0.033$        | 0.549<br>$\pm 0.026$ | 0.513<br>$\pm 0.019$ | 0.691<br>$\pm 0.061$ | 0.602<br>$\pm 0.043$ | 0.563<br>$\pm 0.022$  | 0.483<br>$\pm 0.042$  | 0.581<br>$\pm 0.037$ | 0.575<br>$\pm 0.034$ | 0.549<br>$\pm 0.039$  | 0.486<br>$\pm 0.015$  | 0.737<br>$\pm 0.043$        | 0.550<br>$\pm 0.027$ | 0.681<br>$\pm 0.079$        | 0.540<br>$\pm 0.022$ | 0.725<br>$\pm 0.023$        | 0.576<br>$\pm 0.044$ |
|         | BAcc     | 0.376<br>$\pm 0.052$        | 0.424<br>$\pm 0.047$        | <b>0.405</b><br>$\pm 0.077$ | 0.390<br>$\pm 0.093$        | 0.188<br>$\pm 0.044$ | 0.188<br>$\pm 0.020$ | 0.171<br>$\pm 0.096$ | 0.326<br>$\pm 0.048$ | 0.190<br>$\pm 0.033$  | 0.129<br>$\pm 0.030$  | 0.212<br>$\pm 0.076$ | 0.202<br>$\pm 0.024$ | 0.207<br>$\pm 0.018$  | 0.164<br>$\pm 0.037$  | 0.355<br>$\pm 0.033$        | 0.179<br>$\pm 0.038$ | 0.331<br>$\pm 0.084$        | 0.190<br>$\pm 0.008$ | 0.383<br>$\pm 0.049$        | 0.212<br>$\pm 0.034$ |
|         | Acc.1    | 0.376<br>$\pm 0.052$        | 0.424<br>$\pm 0.047$        | <b>0.405</b><br>$\pm 0.077$ | 0.390<br>$\pm 0.093$        | 0.188<br>$\pm 0.044$ | 0.171<br>$\pm 0.020$ | 0.326<br>$\pm 0.096$ | 0.190<br>$\pm 0.048$ | 0.207<br>$\pm 0.033$  | 0.129<br>$\pm 0.030$  | 0.214<br>$\pm 0.064$ | 0.210<br>$\pm 0.030$ | 0.207<br>$\pm 0.018$  | 0.162<br>$\pm 0.038$  | 0.355<br>$\pm 0.033$        | 0.179<br>$\pm 0.038$ | 0.331<br>$\pm 0.084$        | 0.190<br>$\pm 0.008$ | 0.383<br>$\pm 0.032$        | 0.212<br>$\pm 0.034$ |
|         | Acc.2    | <b>0.619</b><br>$\pm 0.025$ | 0.671<br>$\pm 0.023$        | 0.671<br>$\pm 0.040$        | 0.612<br>$\pm 0.040$        | 0.364<br>$\pm 0.049$ | 0.290<br>$\pm 0.029$ | 0.517<br>$\pm 0.069$ | 0.386<br>$\pm 0.032$ | 0.390<br>$\pm 0.026$  | 0.281<br>$\pm 0.056$  | 0.398<br>$\pm 0.063$ | 0.357<br>$\pm 0.044$ | 0.371<br>$\pm 0.021$  | 0.267<br>$\pm 0.018$  | 0.610<br>$\pm 0.065$        | 0.329<br>$\pm 0.022$ | 0.498<br>$\pm 0.092$        | 0.331<br>$\pm 0.016$ | 0.605<br>$\pm 0.033$        | 0.357<br>$\pm 0.040$ |
| sub11   | $\kappa$ | 0.103<br>$\pm 0.076$        | 0.178<br>$\pm 0.085$        | 0.178<br>$\pm 0.062$        | 0.128<br>$\pm 0.069$        | 0.094<br>$\pm 0.035$ | 0.033<br>$\pm 0.042$ | 0.050<br>$\pm 0.033$ | 0.028<br>$\pm 0.051$ | -0.006<br>$\pm 0.051$ | -0.053<br>$\pm 0.046$ | 0.000<br>$\pm 0.043$ | 0.031<br>$\pm 0.058$ | -0.036<br>$\pm 0.030$ | -0.039<br>$\pm 0.033$ | <b>0.181</b><br>$\pm 0.046$ | 0.025<br>$\pm 0.041$ | 0.172<br>$\pm 0.035$        | 0.036<br>$\pm 0.048$ | 0.197<br>$\pm 0.049$        | 0.042<br>$\pm 0.067$ |
|         | AUC      | 0.644<br>$\pm 0.037$        | 0.674<br>$\pm 0.046$        | 0.651<br>$\pm 0.021$        | 0.629<br>$\pm 0.058$        | 0.603<br>$\pm 0.016$ | 0.547<br>$\pm 0.010$ | 0.557<br>$\pm 0.035$ | 0.536<br>$\pm 0.022$ | 0.484<br>$\pm 0.048$  | 0.442<br>$\pm 0.025$  | 0.504<br>$\pm 0.067$ | 0.524<br>$\pm 0.038$ | 0.492<br>$\pm 0.021$  | 0.471<br>$\pm 0.018$  | 0.649<br>$\pm 0.029$        | 0.563<br>$\pm 0.027$ | <b>0.654</b><br>$\pm 0.012$ | 0.556<br>$\pm 0.029$ | 0.652<br>$\pm 0.040$        | 0.575<br>$\pm 0.040$ |
|         | BAcc     | 0.231<br>$\pm 0.066$        | 0.295<br>$\pm 0.073$        | 0.295<br>$\pm 0.053$        | 0.252<br>$\pm 0.059$        | 0.224<br>$\pm 0.030$ | 0.171<br>$\pm 0.036$ | 0.186<br>$\pm 0.029$ | 0.167<br>$\pm 0.044$ | 0.138<br>$\pm 0.043$  | 0.098<br>$\pm 0.040$  | 0.143<br>$\pm 0.037$ | 0.169<br>$\pm 0.049$ | 0.112<br>$\pm 0.026$  | 0.110<br>$\pm 0.028$  | <b>0.298</b><br>$\pm 0.039$ | 0.164<br>$\pm 0.035$ | 0.290<br>$\pm 0.030$        | 0.174<br>$\pm 0.041$ | 0.312<br>$\pm 0.042$        | 0.179<br>$\pm 0.057$ |
|         | Acc.1    | 0.233<br>$\pm 0.070$        | 0.295<br>$\pm 0.073$        | 0.295<br>$\pm 0.053$        | 0.252<br>$\pm 0.059$        | 0.224<br>$\pm 0.030$ | 0.171<br>$\pm 0.036$ | 0.186<br>$\pm 0.029$ | 0.167<br>$\pm 0.044$ | 0.138<br>$\pm 0.043$  | 0.100<br>$\pm 0.043$  | 0.150<br>$\pm 0.040$ | 0.168<br>$\pm 0.040$ | 0.112<br>$\pm 0.026$  | 0.110<br>$\pm 0.028$  | <b>0.298</b><br>$\pm 0.039$ | 0.164<br>$\pm 0.035$ | 0.290<br>$\pm 0.030$        | 0.174<br>$\pm 0.041$ | 0.313<br>$\pm 0.042$        | 0.179<br>$\pm 0.057$ |
|         | Acc.2    | 0.467<br>$\pm 0.052$        | 0.500<br>$\pm 0.081$        | 0.500<br>$\pm 0.033$        | 0.448<br>$\pm 0.070$        | 0.405<br>$\pm 0.024$ | 0.329<br>$\pm 0.025$ | 0.336<br>$\pm 0.060$ | 0.333<br>$\pm 0.027$ | 0.262<br>$\pm 0.064$  | 0.238<br>$\pm 0.048$  | 0.305<br>$\pm 0.081$ | 0.335<br>$\pm 0.045$ | 0.274<br>$\pm 0.051$  | 0.264<br>$\pm 0.026$  | 0.452<br>$\pm 0.048$        | 0.355<br>$\pm 0.046$ | 0.464<br>$\pm 0.030$        | 0.326<br>$\pm 0.041$ | <b>0.468</b><br>$\pm 0.048$ | 0.345<br>$\pm 0.051$ |

Continued on next page

|                        |          | 172717261725172417231722172117201719171817171716171517141713171217111710170917081707170617051704170317021701170016991698169716961695 |                      |                      |                      |                       |                       |                      |                      |                       |                       |                      |                       |                       |                       |                      |                       |                      |                      |                      |                      |
|------------------------|----------|--------------------------------------------------------------------------------------------------------------------------------------|----------------------|----------------------|----------------------|-----------------------|-----------------------|----------------------|----------------------|-----------------------|-----------------------|----------------------|-----------------------|-----------------------|-----------------------|----------------------|-----------------------|----------------------|----------------------|----------------------|----------------------|
| Subject                | Metric   | DeepConvnet                                                                                                                          | EEGNet               | Conformer            | CTNet                | BIOT (f)              | BIOT (l)              | BENDR (f)            | BENDR (l)            | CBraMod (f)           | CBraMod (l)           | EEGPT (f)            | EEGPT (l)             | LaBraM (f)            | LaBraM (l)            | STEEGformer-s (f)    | STEEGformer-s (l)     | STEEGformer-b (f)    | STEEGformer-b (l)    | STEEGformer-l (f)    | STEEGformer-l (l)    |
| sub12                  | $\kappa$ | 0.200<br>$\pm 0.051$                                                                                                                 | 0.178<br>$\pm 0.066$ | 0.156<br>$\pm 0.032$ | 0.128<br>$\pm 0.030$ | 0.022<br>$\pm 0.050$  | 0.022<br>$\pm 0.063$  | 0.083<br>$\pm 0.044$ | 0.028<br>$\pm 0.046$ | 0.025<br>$\pm 0.027$  | -0.044<br>$\pm 0.021$ | 0.011<br>$\pm 0.062$ | -0.014<br>$\pm 0.071$ | 0.061<br>$\pm 0.039$  | 0.000<br>$\pm 0.010$  | 0.161<br>$\pm 0.035$ | 0.075<br>$\pm 0.038$  | 0.150<br>$\pm 0.074$ | 0.069<br>$\pm 0.035$ | 0.242<br>$\pm 0.056$ | 0.064<br>$\pm 0.063$ |
|                        | AUC      | 0.698<br>$\pm 0.042$                                                                                                                 | 0.678<br>$\pm 0.035$ | 0.657<br>$\pm 0.037$ | 0.655<br>$\pm 0.029$ | 0.516<br>$\pm 0.019$  | 0.543<br>$\pm 0.036$  | 0.598<br>$\pm 0.036$ | 0.551<br>$\pm 0.030$ | 0.524<br>$\pm 0.030$  | 0.453<br>$\pm 0.020$  | 0.513<br>$\pm 0.043$ | 0.525<br>$\pm 0.065$  | 0.558<br>$\pm 0.023$  | 0.471<br>$\pm 0.019$  | 0.661<br>$\pm 0.019$ | 0.570<br>$\pm 0.036$  | 0.648<br>$\pm 0.054$ | 0.574<br>$\pm 0.050$ | 0.702<br>$\pm 0.047$ | 0.587<br>$\pm 0.040$ |
|                        | BAcc     | 0.314<br>$\pm 0.043$                                                                                                                 | 0.295<br>$\pm 0.057$ | 0.276<br>$\pm 0.027$ | 0.252<br>$\pm 0.026$ | 0.162<br>$\pm 0.043$  | 0.162<br>$\pm 0.054$  | 0.214<br>$\pm 0.038$ | 0.167<br>$\pm 0.039$ | 0.164<br>$\pm 0.023$  | 0.105<br>$\pm 0.018$  | 0.152<br>$\pm 0.054$ | 0.131<br>$\pm 0.061$  | 0.195<br>$\pm 0.033$  | 0.143<br>$\pm 0.008$  | 0.281<br>$\pm 0.030$ | 0.207<br>$\pm 0.032$  | 0.271<br>$\pm 0.064$ | 0.202<br>$\pm 0.030$ | 0.350<br>$\pm 0.048$ | 0.198<br>$\pm 0.054$ |
|                        | Acc_1    | 0.314<br>$\pm 0.043$                                                                                                                 | 0.295<br>$\pm 0.057$ | 0.276<br>$\pm 0.027$ | 0.252<br>$\pm 0.026$ | 0.162<br>$\pm 0.043$  | 0.162<br>$\pm 0.054$  | 0.214<br>$\pm 0.038$ | 0.167<br>$\pm 0.039$ | 0.164<br>$\pm 0.023$  | 0.105<br>$\pm 0.018$  | 0.157<br>$\pm 0.054$ | 0.133<br>$\pm 0.064$  | 0.195<br>$\pm 0.033$  | 0.143<br>$\pm 0.008$  | 0.281<br>$\pm 0.030$ | 0.210<br>$\pm 0.033$  | 0.271<br>$\pm 0.064$ | 0.202<br>$\pm 0.030$ | 0.350<br>$\pm 0.047$ | 0.200<br>$\pm 0.058$ |
|                        | Acc_2    | 0.531<br>$\pm 0.052$                                                                                                                 | 0.502<br>$\pm 0.042$ | 0.474<br>$\pm 0.045$ | 0.436<br>$\pm 0.068$ | 0.331<br>$\pm 0.046$  | 0.326<br>$\pm 0.068$  | 0.400<br>$\pm 0.046$ | 0.345<br>$\pm 0.039$ | 0.314<br>$\pm 0.025$  | 0.240<br>$\pm 0.037$  | 0.299<br>$\pm 0.049$ | 0.299<br>$\pm 0.056$  | 0.352<br>$\pm 0.057$  | 0.250<br>$\pm 0.028$  | 0.460<br>$\pm 0.038$ | 0.386<br>$\pm 0.063$  | 0.443<br>$\pm 0.045$ | 0.376<br>$\pm 0.043$ | 0.527<br>$\pm 0.053$ | 0.343<br>$\pm 0.047$ |
| sub13                  | $\kappa$ | 0.150<br>$\pm 0.036$                                                                                                                 | 0.183<br>$\pm 0.090$ | 0.167<br>$\pm 0.074$ | 0.158<br>$\pm 0.035$ | -0.011<br>$\pm 0.036$ | -0.036<br>$\pm 0.029$ | 0.067<br>$\pm 0.037$ | 0.003<br>$\pm 0.043$ | 0.014<br>$\pm 0.043$  | -0.064<br>$\pm 0.021$ | 0.056<br>$\pm 0.054$ | 0.039<br>$\pm 0.068$  | -0.042<br>$\pm 0.033$ | -0.036<br>$\pm 0.025$ | 0.100<br>$\pm 0.012$ | -0.003<br>$\pm 0.023$ | 0.081<br>$\pm 0.021$ | 0.006<br>$\pm 0.036$ | 0.114<br>$\pm 0.032$ | 0.003<br>$\pm 0.037$ |
|                        | AUC      | 0.695<br>$\pm 0.039$                                                                                                                 | 0.688<br>$\pm 0.046$ | 0.685<br>$\pm 0.022$ | 0.673<br>$\pm 0.038$ | 0.474<br>$\pm 0.020$  | 0.485<br>$\pm 0.022$  | 0.588<br>$\pm 0.035$ | 0.516<br>$\pm 0.029$ | 0.504<br>$\pm 0.031$  | 0.412<br>$\pm 0.037$  | 0.552<br>$\pm 0.038$ | 0.555<br>$\pm 0.030$  | 0.467<br>$\pm 0.023$  | 0.453<br>$\pm 0.020$  | 0.598<br>$\pm 0.050$ | 0.508<br>$\pm 0.025$  | 0.555<br>$\pm 0.019$ | 0.510<br>$\pm 0.028$ | 0.608<br>$\pm 0.024$ | 0.509<br>$\pm 0.027$ |
|                        | BAcc     | 0.271<br>$\pm 0.031$                                                                                                                 | 0.300<br>$\pm 0.077$ | 0.286<br>$\pm 0.064$ | 0.279<br>$\pm 0.030$ | 0.133<br>$\pm 0.031$  | 0.112<br>$\pm 0.025$  | 0.200<br>$\pm 0.032$ | 0.145<br>$\pm 0.037$ | 0.155<br>$\pm 0.037$  | 0.088<br>$\pm 0.018$  | 0.190<br>$\pm 0.046$ | 0.176<br>$\pm 0.058$  | 0.107<br>$\pm 0.028$  | 0.112<br>$\pm 0.022$  | 0.229<br>$\pm 0.010$ | 0.140<br>$\pm 0.020$  | 0.212<br>$\pm 0.018$ | 0.148<br>$\pm 0.031$ | 0.240<br>$\pm 0.027$ | 0.145<br>$\pm 0.032$ |
|                        | Acc_1    | 0.271<br>$\pm 0.031$                                                                                                                 | 0.300<br>$\pm 0.077$ | 0.286<br>$\pm 0.064$ | 0.276<br>$\pm 0.032$ | 0.133<br>$\pm 0.031$  | 0.112<br>$\pm 0.025$  | 0.200<br>$\pm 0.032$ | 0.145<br>$\pm 0.037$ | 0.155<br>$\pm 0.037$  | 0.088<br>$\pm 0.018$  | 0.192<br>$\pm 0.054$ | 0.170<br>$\pm 0.048$  | 0.107<br>$\pm 0.028$  | 0.112<br>$\pm 0.022$  | 0.229<br>$\pm 0.010$ | 0.143<br>$\pm 0.024$  | 0.212<br>$\pm 0.018$ | 0.148<br>$\pm 0.031$ | 0.241<br>$\pm 0.020$ | 0.145<br>$\pm 0.032$ |
|                        | Acc_2    | 0.490<br>$\pm 0.077$                                                                                                                 | 0.512<br>$\pm 0.050$ | 0.495<br>$\pm 0.043$ | 0.488<br>$\pm 0.062$ | 0.248<br>$\pm 0.020$  | 0.262<br>$\pm 0.024$  | 0.376<br>$\pm 0.040$ | 0.302<br>$\pm 0.056$ | 0.302<br>$\pm 0.043$  | 0.205<br>$\pm 0.046$  | 0.329<br>$\pm 0.014$ | 0.307<br>$\pm 0.032$  | 0.257<br>$\pm 0.050$  | 0.233<br>$\pm 0.027$  | 0.440<br>$\pm 0.055$ | 0.295<br>$\pm 0.037$  | 0.371<br>$\pm 0.020$ | 0.288<br>$\pm 0.038$ | 0.420<br>$\pm 0.039$ | 0.305<br>$\pm 0.031$ |
| sub14                  | $\kappa$ | 0.206<br>$\pm 0.025$                                                                                                                 | 0.233<br>$\pm 0.081$ | 0.231<br>$\pm 0.080$ | 0.167<br>$\pm 0.043$ | 0.067<br>$\pm 0.051$  | -0.011<br>$\pm 0.033$ | 0.119<br>$\pm 0.049$ | 0.053<br>$\pm 0.049$ | -0.047<br>$\pm 0.032$ | 0.000<br>$\pm 0.000$  | 0.019<br>$\pm 0.055$ | 0.028<br>$\pm 0.040$  | -0.011<br>$\pm 0.025$ | 0.008<br>$\pm 0.021$  | 0.214<br>$\pm 0.075$ | 0.050<br>$\pm 0.056$  | 0.169<br>$\pm 0.059$ | 0.028<br>$\pm 0.033$ | 0.206<br>$\pm 0.061$ | 0.017<br>$\pm 0.023$ |
|                        | AUC      | 0.710<br>$\pm 0.029$                                                                                                                 | 0.721<br>$\pm 0.016$ | 0.713<br>$\pm 0.032$ | 0.677<br>$\pm 0.020$ | 0.581<br>$\pm 0.088$  | 0.487<br>$\pm 0.039$  | 0.615<br>$\pm 0.042$ | 0.550<br>$\pm 0.032$ | 0.428<br>$\pm 0.037$  | 0.450<br>$\pm 0.028$  | 0.533<br>$\pm 0.026$ | 0.539<br>$\pm 0.047$  | 0.482<br>$\pm 0.023$  | 0.436<br>$\pm 0.038$  | 0.669<br>$\pm 0.034$ | 0.549<br>$\pm 0.038$  | 0.682<br>$\pm 0.045$ | 0.549<br>$\pm 0.037$ | 0.690<br>$\pm 0.036$ | 0.544<br>$\pm 0.036$ |
|                        | BAcc     | 0.319<br>$\pm 0.021$                                                                                                                 | 0.343<br>$\pm 0.069$ | 0.340<br>$\pm 0.068$ | 0.286<br>$\pm 0.037$ | 0.200<br>$\pm 0.044$  | 0.133<br>$\pm 0.028$  | 0.245<br>$\pm 0.042$ | 0.188<br>$\pm 0.042$ | 0.102<br>$\pm 0.027$  | 0.143<br>$\pm 0.000$  | 0.160<br>$\pm 0.047$ | 0.167<br>$\pm 0.035$  | 0.133<br>$\pm 0.021$  | 0.150<br>$\pm 0.018$  | 0.326<br>$\pm 0.064$ | 0.186<br>$\pm 0.048$  | 0.288<br>$\pm 0.051$ | 0.167<br>$\pm 0.028$ | 0.319<br>$\pm 0.052$ | 0.157<br>$\pm 0.020$ |
|                        | Acc_1    | 0.319<br>$\pm 0.021$                                                                                                                 | 0.343<br>$\pm 0.069$ | 0.340<br>$\pm 0.068$ | 0.286<br>$\pm 0.037$ | 0.200<br>$\pm 0.044$  | 0.133<br>$\pm 0.028$  | 0.245<br>$\pm 0.042$ | 0.188<br>$\pm 0.042$ | 0.102<br>$\pm 0.027$  | 0.143<br>$\pm 0.000$  | 0.156<br>$\pm 0.043$ | 0.168<br>$\pm 0.037$  | 0.133<br>$\pm 0.021$  | 0.148<br>$\pm 0.014$  | 0.326<br>$\pm 0.064$ | 0.186<br>$\pm 0.048$  | 0.288<br>$\pm 0.051$ | 0.167<br>$\pm 0.028$ | 0.318<br>$\pm 0.046$ | 0.157<br>$\pm 0.020$ |
|                        | Acc_2    | 0.512<br>$\pm 0.024$                                                                                                                 | 0.517<br>$\pm 0.032$ | 0.552<br>$\pm 0.054$ | 0.490<br>$\pm 0.033$ | 0.383<br>$\pm 0.078$  | 0.295<br>$\pm 0.038$  | 0.429<br>$\pm 0.092$ | 0.355<br>$\pm 0.047$ | 0.202<br>$\pm 0.036$  | 0.286<br>$\pm 0.000$  | 0.317<br>$\pm 0.035$ | 0.343<br>$\pm 0.074$  | 0.288<br>$\pm 0.013$  | 0.264<br>$\pm 0.032$  | 0.524<br>$\pm 0.081$ | 0.331<br>$\pm 0.058$  | 0.510<br>$\pm 0.062$ | 0.336<br>$\pm 0.035$ | 0.524<br>$\pm 0.024$ | 0.298<br>$\pm 0.042$ |
| sub15                  | $\kappa$ | 0.217<br>$\pm 0.021$                                                                                                                 | 0.172<br>$\pm 0.063$ | 0.164<br>$\pm 0.055$ | 0.167<br>$\pm 0.071$ | 0.097<br>$\pm 0.047$  | 0.025<br>$\pm 0.023$  | 0.072<br>$\pm 0.041$ | 0.017<br>$\pm 0.027$ | 0.067<br>$\pm 0.039$  | -0.019<br>$\pm 0.023$ | 0.019<br>$\pm 0.032$ | 0.067<br>$\pm 0.030$  | -0.025<br>$\pm 0.037$ | -0.011<br>$\pm 0.055$ | 0.181<br>$\pm 0.067$ | 0.042<br>$\pm 0.061$  | 0.172<br>$\pm 0.059$ | 0.047<br>$\pm 0.053$ | 0.236<br>$\pm 0.054$ | 0.033<br>$\pm 0.066$ |
| Continued on next page |          |                                                                                                                                      |                      |                      |                      |                       |                       |                      |                      |                       |                       |                      |                       |                       |                       |                      |                       |                      |                      |                      |                      |

| SubjectMetric |                  | DeepConvnet                                                        | EEGNet               | Conformer                                                          | CTNet                | BIOT (f)             | BIOT (l)             | BENDR (f)            | BENDR (l)             | CBraMod (f)           | CBraMod (l)           | EEGPT (f)            | EEGPT (l)            | LaBraM (f)            | LaBraM (l)            | STEEGformer-s (f)                                                  | STEEGformer-s (l)    | STEEGformer-b (f)                                                  | STEEGformer-b (l)    | STEEGformer-h (f)                                                  | STEEGformer-h (l)    |
|---------------|------------------|--------------------------------------------------------------------|----------------------|--------------------------------------------------------------------|----------------------|----------------------|----------------------|----------------------|-----------------------|-----------------------|-----------------------|----------------------|----------------------|-----------------------|-----------------------|--------------------------------------------------------------------|----------------------|--------------------------------------------------------------------|----------------------|--------------------------------------------------------------------|----------------------|
|               | AUC              | $\begin{matrix} 0.706 \\ \pm 0.008 \end{matrix}$                   | 0.668<br>$\pm 0.047$ | 0.652<br>$\pm 0.034$                                               | 0.658<br>$\pm 0.031$ | 0.567<br>$\pm 0.038$ | 0.534<br>$\pm 0.044$ | 0.562<br>$\pm 0.034$ | 0.557<br>$\pm 0.046$  | 0.589<br>$\pm 0.029$  | 0.484<br>$\pm 0.022$  | 0.536<br>$\pm 0.036$ | 0.554<br>$\pm 0.021$ | 0.473<br>$\pm 0.052$  | 0.479<br>$\pm 0.062$  | 0.675<br>$\pm 0.056$                                               | 0.540<br>$\pm 0.064$ | 0.656<br>$\pm 0.053$                                               | 0.539<br>$\pm 0.058$ | $\begin{matrix} \mathbf{0.689} \\ \pm \mathbf{0.030} \end{matrix}$ | 0.546<br>$\pm 0.053$ |
|               | BAcc             | $\begin{matrix} \mathbf{0.329} \\ \pm \mathbf{0.018} \end{matrix}$ | 0.290<br>$\pm 0.054$ | 0.283<br>$\pm 0.047$                                               | 0.286<br>$\pm 0.061$ | 0.226<br>$\pm 0.040$ | 0.164<br>$\pm 0.020$ | 0.205<br>$\pm 0.035$ | 0.157<br>$\pm 0.023$  | 0.200<br>$\pm 0.033$  | 0.126<br>$\pm 0.020$  | 0.160<br>$\pm 0.027$ | 0.200<br>$\pm 0.026$ | 0.121<br>$\pm 0.032$  | 0.133<br>$\pm 0.047$  | 0.298<br>$\pm 0.058$                                               | 0.179<br>$\pm 0.052$ | 0.290<br>$\pm 0.050$                                               | 0.183<br>$\pm 0.046$ | $\begin{matrix} 0.345 \\ \pm 0.046 \end{matrix}$                   | 0.171<br>$\pm 0.057$ |
|               | Acc <sub>1</sub> | $\begin{matrix} \mathbf{0.329} \\ \pm \mathbf{0.018} \end{matrix}$ | 0.290<br>$\pm 0.054$ | 0.283<br>$\pm 0.047$                                               | 0.286<br>$\pm 0.061$ | 0.226<br>$\pm 0.040$ | 0.164<br>$\pm 0.020$ | 0.205<br>$\pm 0.035$ | 0.160<br>$\pm 0.023$  | 0.200<br>$\pm 0.033$  | 0.126<br>$\pm 0.020$  | 0.158<br>$\pm 0.035$ | 0.205<br>$\pm 0.027$ | 0.121<br>$\pm 0.032$  | 0.131<br>$\pm 0.049$  | 0.298<br>$\pm 0.058$                                               | 0.179<br>$\pm 0.052$ | 0.290<br>$\pm 0.050$                                               | 0.183<br>$\pm 0.046$ | $\begin{matrix} 0.350 \\ \pm 0.044 \end{matrix}$                   | 0.171<br>$\pm 0.057$ |
|               | Acc <sub>2</sub> | $\begin{matrix} \mathbf{0.538} \\ \pm \mathbf{0.018} \end{matrix}$ | 0.498<br>$\pm 0.076$ | 0.469<br>$\pm 0.044$                                               | 0.467<br>$\pm 0.068$ | 0.364<br>$\pm 0.056$ | 0.314<br>$\pm 0.045$ | 0.350<br>$\pm 0.031$ | 0.350<br>$\pm 0.041$  | 0.388<br>$\pm 0.041$  | 0.260<br>$\pm 0.021$  | 0.297<br>$\pm 0.035$ | 0.351<br>$\pm 0.025$ | 0.262<br>$\pm 0.053$  | 0.262<br>$\pm 0.033$  | $\begin{matrix} \mathbf{0.538} \\ \pm \mathbf{0.066} \end{matrix}$ | 0.329<br>$\pm 0.068$ | 0.476<br>$\pm 0.048$                                               | 0.324<br>$\pm 0.057$ | $\begin{matrix} 0.555 \\ \pm 0.050 \end{matrix}$                   | 0.336<br>$\pm 0.059$ |
|               | κ                | $\begin{matrix} 0.178 \\ \pm 0.025 \end{matrix}$                   | 0.192<br>$\pm 0.068$ | 0.208<br>$\pm 0.051$                                               | 0.175<br>$\pm 0.051$ | 0.139<br>$\pm 0.035$ | 0.000<br>$\pm 0.071$ | 0.072<br>$\pm 0.048$ | -0.017<br>$\pm 0.025$ | -0.022<br>$\pm 0.016$ | -0.011<br>$\pm 0.012$ | 0.014<br>$\pm 0.055$ | 0.014<br>$\pm 0.028$ | -0.003<br>$\pm 0.025$ | 0.003<br>$\pm 0.063$  | 0.197<br>$\pm 0.086$                                               | 0.039<br>$\pm 0.062$ | $\begin{matrix} \mathbf{0.225} \\ \pm \mathbf{0.043} \end{matrix}$ | 0.047<br>$\pm 0.041$ | $\begin{matrix} 0.236 \\ \pm 0.086 \end{matrix}$                   | 0.075<br>$\pm 0.061$ |
| sub2          | AUC              | $\begin{matrix} 0.667 \\ \pm 0.021 \end{matrix}$                   | 0.675<br>$\pm 0.036$ | $\begin{matrix} \mathbf{0.685} \\ \pm \mathbf{0.033} \end{matrix}$ | 0.635<br>$\pm 0.037$ | 0.608<br>$\pm 0.030$ | 0.548<br>$\pm 0.030$ | 0.571<br>$\pm 0.020$ | 0.479<br>$\pm 0.038$  | 0.432<br>$\pm 0.028$  | 0.448<br>$\pm 0.018$  | 0.508<br>$\pm 0.048$ | 0.511<br>$\pm 0.025$ | 0.483<br>$\pm 0.035$  | 0.476<br>$\pm 0.051$  | 0.672<br>$\pm 0.035$                                               | 0.552<br>$\pm 0.041$ | 0.668<br>$\pm 0.017$                                               | 0.568<br>$\pm 0.035$ | $\begin{matrix} 0.693 \\ \pm 0.056 \end{matrix}$                   | 0.590<br>$\pm 0.025$ |
|               | BAcc             | $\begin{matrix} 0.295 \\ \pm 0.021 \end{matrix}$                   | 0.307<br>$\pm 0.059$ | 0.321<br>$\pm 0.044$                                               | 0.293<br>$\pm 0.043$ | 0.262<br>$\pm 0.030$ | 0.143<br>$\pm 0.061$ | 0.205<br>$\pm 0.041$ | 0.129<br>$\pm 0.021$  | 0.124<br>$\pm 0.014$  | 0.133<br>$\pm 0.010$  | 0.155<br>$\pm 0.047$ | 0.155<br>$\pm 0.024$ | 0.140<br>$\pm 0.021$  | 0.145<br>$\pm 0.054$  | 0.312<br>$\pm 0.074$                                               | 0.176<br>$\pm 0.054$ | $\begin{matrix} \mathbf{0.336} \\ \pm \mathbf{0.037} \end{matrix}$ | 0.183<br>$\pm 0.035$ | $\begin{matrix} 0.345 \\ \pm 0.073 \end{matrix}$                   | 0.207<br>$\pm 0.052$ |
|               | Acc <sub>1</sub> | $\begin{matrix} 0.295 \\ \pm 0.021 \end{matrix}$                   | 0.307<br>$\pm 0.059$ | 0.321<br>$\pm 0.044$                                               | 0.290<br>$\pm 0.039$ | 0.262<br>$\pm 0.030$ | 0.143<br>$\pm 0.061$ | 0.205<br>$\pm 0.041$ | 0.129<br>$\pm 0.021$  | 0.126<br>$\pm 0.011$  | 0.131<br>$\pm 0.015$  | 0.152<br>$\pm 0.045$ | 0.153<br>$\pm 0.018$ | 0.138<br>$\pm 0.022$  | 0.145<br>$\pm 0.054$  | 0.312<br>$\pm 0.074$                                               | 0.176<br>$\pm 0.054$ | $\begin{matrix} \mathbf{0.336} \\ \pm \mathbf{0.037} \end{matrix}$ | 0.183<br>$\pm 0.035$ | $\begin{matrix} 0.341 \\ \pm 0.082 \end{matrix}$                   | 0.210<br>$\pm 0.051$ |
|               | Acc <sub>2</sub> | $\begin{matrix} 0.495 \\ \pm 0.020 \end{matrix}$                   | 0.493<br>$\pm 0.056$ | $\begin{matrix} \mathbf{0.521} \\ \pm \mathbf{0.051} \end{matrix}$ | 0.448<br>$\pm 0.036$ | 0.405<br>$\pm 0.056$ | 0.290<br>$\pm 0.043$ | 0.345<br>$\pm 0.037$ | 0.260<br>$\pm 0.042$  | 0.248<br>$\pm 0.035$  | 0.271<br>$\pm 0.020$  | 0.302<br>$\pm 0.045$ | 0.300<br>$\pm 0.017$ | 0.286<br>$\pm 0.022$  | 0.271<br>$\pm 0.054$  | 0.507<br>$\pm 0.054$                                               | 0.340<br>$\pm 0.034$ | 0.510<br>$\pm 0.021$                                               | 0.364<br>$\pm 0.055$ | $\begin{matrix} 0.529 \\ \pm 0.071 \end{matrix}$                   | 0.395<br>$\pm 0.051$ |
|               | κ                | $\begin{matrix} 0.686 \\ \pm 0.066 \end{matrix}$                   | 0.636<br>$\pm 0.040$ | 0.706<br>$\pm 0.051$                                               | 0.667<br>$\pm 0.040$ | 0.189<br>$\pm 0.038$ | 0.064<br>$\pm 0.021$ | 0.583<br>$\pm 0.085$ | 0.106<br>$\pm 0.070$  | 0.381<br>$\pm 0.025$  | 0.019<br>$\pm 0.074$  | 0.133<br>$\pm 0.059$ | 0.389<br>$\pm 0.051$ | 0.000<br>$\pm 0.000$  | -0.014<br>$\pm 0.044$ | 0.861<br>$\pm 0.029$                                               | 0.239<br>$\pm 0.027$ | $\begin{matrix} \mathbf{0.894} \\ \pm \mathbf{0.032} \end{matrix}$ | 0.311<br>$\pm 0.066$ | $\begin{matrix} 0.925 \\ \pm 0.021 \end{matrix}$                   | 0.256<br>$\pm 0.060$ |
| sub3          | AUC              | $\begin{matrix} 0.947 \\ \pm 0.014 \end{matrix}$                   | 0.927<br>$\pm 0.021$ | 0.933<br>$\pm 0.025$                                               | 0.938<br>$\pm 0.009$ | 0.648<br>$\pm 0.028$ | 0.598<br>$\pm 0.032$ | 0.897<br>$\pm 0.021$ | 0.598<br>$\pm 0.041$  | 0.810<br>$\pm 0.021$  | 0.515<br>$\pm 0.051$  | 0.630<br>$\pm 0.059$ | 0.812<br>$\pm 0.032$ | 0.507<br>$\pm 0.010$  | 0.496<br>$\pm 0.021$  | 0.986<br>$\pm 0.005$                                               | 0.754<br>$\pm 0.031$ | $\begin{matrix} \mathbf{0.991} \\ \pm \mathbf{0.004} \end{matrix}$ | 0.796<br>$\pm 0.027$ | $\begin{matrix} 0.993 \\ \pm 0.004 \end{matrix}$                   | 0.779<br>$\pm 0.036$ |
|               | BAcc             | $\begin{matrix} 0.731 \\ \pm 0.056 \end{matrix}$                   | 0.688<br>$\pm 0.034$ | 0.748<br>$\pm 0.044$                                               | 0.714<br>$\pm 0.035$ | 0.305<br>$\pm 0.032$ | 0.198<br>$\pm 0.018$ | 0.643<br>$\pm 0.073$ | 0.233<br>$\pm 0.060$  | 0.469<br>$\pm 0.022$  | 0.160<br>$\pm 0.063$  | 0.257<br>$\pm 0.051$ | 0.476<br>$\pm 0.044$ | 0.143<br>$\pm 0.000$  | 0.131<br>$\pm 0.038$  | 0.881<br>$\pm 0.025$                                               | 0.348<br>$\pm 0.023$ | $\begin{matrix} \mathbf{0.910} \\ \pm \mathbf{0.027} \end{matrix}$ | 0.410<br>$\pm 0.057$ | $\begin{matrix} 0.936 \\ \pm 0.018 \end{matrix}$                   | 0.362<br>$\pm 0.052$ |
|               | Acc <sub>1</sub> | $\begin{matrix} 0.731 \\ \pm 0.056 \end{matrix}$                   | 0.688<br>$\pm 0.034$ | 0.748<br>$\pm 0.044$                                               | 0.712<br>$\pm 0.036$ | 0.305<br>$\pm 0.032$ | 0.198<br>$\pm 0.018$ | 0.640<br>$\pm 0.077$ | 0.233<br>$\pm 0.060$  | 0.469<br>$\pm 0.022$  | 0.157<br>$\pm 0.059$  | 0.265<br>$\pm 0.051$ | 0.485<br>$\pm 0.046$ | 0.143<br>$\pm 0.000$  | 0.129<br>$\pm 0.042$  | 0.881<br>$\pm 0.025$                                               | 0.348<br>$\pm 0.023$ | $\begin{matrix} \mathbf{0.910} \\ \pm \mathbf{0.027} \end{matrix}$ | 0.410<br>$\pm 0.057$ | $\begin{matrix} 0.934 \\ \pm 0.020 \end{matrix}$                   | 0.362<br>$\pm 0.052$ |
|               | Acc <sub>2</sub> | $\begin{matrix} 0.833 \\ \pm 0.060 \end{matrix}$                   | 0.843<br>$\pm 0.042$ | 0.843<br>$\pm 0.058$                                               | 0.855<br>$\pm 0.028$ | 0.460<br>$\pm 0.034$ | 0.371<br>$\pm 0.046$ | 0.788<br>$\pm 0.042$ | 0.412<br>$\pm 0.057$  | 0.686<br>$\pm 0.043$  | 0.312<br>$\pm 0.044$  | 0.415<br>$\pm 0.073$ | 0.691<br>$\pm 0.034$ | 0.286<br>$\pm 0.000$  | 0.267<br>$\pm 0.031$  | $\begin{matrix} \mathbf{0.960} \\ \pm \mathbf{0.014} \end{matrix}$ | 0.562<br>$\pm 0.074$ | 0.955<br>$\pm 0.013$                                               | 0.619<br>$\pm 0.028$ | $\begin{matrix} 0.983 \\ \pm 0.013 \end{matrix}$                   | 0.576<br>$\pm 0.042$ |
|               | κ                | $\begin{matrix} 0.692 \\ \pm 0.035 \end{matrix}$                   | 0.664<br>$\pm 0.051$ | 0.719<br>$\pm 0.025$                                               | 0.658<br>$\pm 0.049$ | 0.639<br>$\pm 0.084$ | 0.008<br>$\pm 0.012$ | 0.544<br>$\pm 0.040$ | 0.097<br>$\pm 0.064$  | 0.469<br>$\pm 0.021$  | 0.000<br>$\pm 0.000$  | 0.411<br>$\pm 0.038$ | 0.403<br>$\pm 0.058$ | 0.078<br>$\pm 0.174$  | -0.003<br>$\pm 0.027$ | 0.833<br>$\pm 0.026$                                               | 0.275<br>$\pm 0.054$ | $\begin{matrix} 0.853 \\ \pm 0.040 \end{matrix}$                   | 0.292<br>$\pm 0.040$ | $\begin{matrix} \mathbf{0.836} \\ \pm \mathbf{0.048} \end{matrix}$ | 0.261<br>$\pm 0.062$ |
| sub4          | AUC              | $\begin{matrix} 0.946 \\ \pm 0.011 \end{matrix}$                   | 0.946<br>$\pm 0.012$ | 0.956<br>$\pm 0.013$                                               | 0.930<br>$\pm 0.019$ | 0.893<br>$\pm 0.020$ | 0.893<br>$\pm 0.067$ | 0.533<br>$\pm 0.023$ | 0.883<br>$\pm 0.060$  | 0.533<br>$\pm 0.028$  | 0.837<br>$\pm 0.036$  | 0.830<br>$\pm 0.037$ | 0.830<br>$\pm 0.023$ | 0.584<br>$\pm 0.168$  | 0.497<br>$\pm 0.022$  | $\begin{matrix} 0.983 \\ \pm 0.005 \end{matrix}$                   | 0.771<br>$\pm 0.028$ | 0.981<br>$\pm 0.009$                                               | 0.800<br>$\pm 0.030$ | $\begin{matrix} \mathbf{0.982} \\ \pm \mathbf{0.008} \end{matrix}$ | 0.769<br>$\pm 0.042$ |

Continued on next page

| Subject | Metric   | DeepConvnet     | EEGNet                         | Conformer                      | CTNet                          | BIOT (f)        | BIOT (l)        | BENDR (f)       | BENDR (l)       | CBraMod (f)      | CBraMod (l)      | EEGPT (f)       | EEGPT (l)       | LaBraM (f)       | LaBraM (l)       | STEEGformer-s (f)              | STEEGformer-s (l) | STEEGformer-b (f)              | STEEGformer-b (l) | STEEGformer-l (f)              | STEEGformer-l (l) |      |
|---------|----------|-----------------|--------------------------------|--------------------------------|--------------------------------|-----------------|-----------------|-----------------|-----------------|------------------|------------------|-----------------|-----------------|------------------|------------------|--------------------------------|-------------------|--------------------------------|-------------------|--------------------------------|-------------------|------|
|         |          |                 |                                |                                |                                |                 |                 |                 |                 |                  |                  |                 |                 |                  |                  |                                |                   |                                |                   |                                |                   |      |
| sub5    | BAcc     | 0.736<br>±0.030 | 0.712<br>±0.044                | 0.760<br>±0.021                | 0.707<br>±0.042                | 0.690<br>±0.072 | 0.150<br>±0.011 | 0.610<br>±0.034 | 0.226<br>±0.055 | 0.545<br>±0.018  | 0.143<br>±0.000  | 0.495<br>±0.032 | 0.488<br>±0.050 | 0.210<br>±0.149  | 0.140<br>±0.023  | 0.857<br>±0.022                | 0.379<br>±0.046   | 0.874<br>±0.034                | 0.393<br>±0.035   | <b>0.860</b><br>± <b>0.041</b> | 0.367<br>±0.053   | 1761 |
|         | Acc_1    | 0.736<br>±0.030 | 0.712<br>±0.044                | 0.760<br>±0.021                | 0.707<br>±0.042                | 0.690<br>±0.072 | 0.150<br>±0.011 | 0.610<br>±0.034 | 0.226<br>±0.055 | 0.545<br>±0.018  | 0.143<br>±0.000  | 0.497<br>±0.032 | 0.495<br>±0.057 | 0.210<br>±0.149  | 0.140<br>±0.023  | 0.857<br>±0.022                | 0.379<br>±0.046   | 0.874<br>±0.034                | 0.393<br>±0.035   | <b>0.867</b><br>± <b>0.031</b> | 0.367<br>±0.053   | 1762 |
|         | Acc_2    | 0.862<br>±0.026 | 0.871<br>±0.018                | 0.898<br>±0.034                | 0.850<br>±0.036                | 0.855<br>±0.033 | 0.310<br>±0.028 | 0.781<br>±0.041 | 0.393<br>±0.110 | 0.800<br>±0.043  | 0.286<br>±0.000  | 0.713<br>±0.087 | 0.703<br>±0.035 | 0.388<br>±0.229  | 0.283<br>±0.027  | 0.969<br>±0.018                | 0.583<br>±0.049   | 0.960<br>±0.016                | 0.621<br>±0.069   | <b>0.967</b><br>± <b>0.023</b> | 0.624<br>±0.080   | 1763 |
|         | $\kappa$ | 0.158<br>±0.049 | 0.203<br>±0.065                | <b>0.247</b><br>± <b>0.065</b> | 0.244<br>±0.042                | 0.061<br>±0.062 | 0.003<br>±0.030 | 0.097<br>±0.067 | 0.033<br>±0.053 | 0.006<br>±0.071  | -0.036<br>±0.041 | 0.017<br>±0.037 | 0.011<br>±0.049 | 0.003<br>±0.057  | -0.008<br>±0.038 | 0.258<br>±0.071                | -0.008<br>±0.016  | 0.139<br>±0.049                | 0.014<br>±0.026   | 0.239<br>±0.058                | 0.036<br>±0.016   | 1764 |
|         | AUC      | 0.717<br>±0.039 | <b>0.718</b><br>± <b>0.026</b> | 0.715<br>±0.021                | 0.726<br>±0.018                | 0.559<br>±0.027 | 0.506<br>±0.025 | 0.629<br>±0.045 | 0.526<br>±0.027 | 0.499<br>±0.049  | 0.438<br>±0.031  | 0.541<br>±0.036 | 0.554<br>±0.035 | 0.491<br>±0.077  | 0.476<br>±0.009  | 0.696<br>±0.048                | 0.517<br>±0.019   | 0.627<br>±0.033                | 0.517<br>±0.014   | 0.680<br>±0.040                | 0.537<br>±0.020   | 1765 |
|         | BAcc     | 0.279<br>±0.042 | 0.317<br>±0.056                | <b>0.355</b><br>± <b>0.055</b> | 0.352<br>±0.036                | 0.195<br>±0.053 | 0.145<br>±0.026 | 0.226<br>±0.058 | 0.171<br>±0.045 | 0.148<br>±0.060  | 0.112<br>±0.035  | 0.157<br>±0.032 | 0.152<br>±0.042 | 0.145<br>±0.049  | 0.136<br>±0.032  | 0.364<br>±0.061                | 0.136<br>±0.014   | 0.262<br>±0.042                | 0.155<br>±0.022   | 0.348<br>±0.050                | 0.174<br>±0.014   | 1766 |
| sub6    | Acc_1    | 0.279<br>±0.042 | 0.317<br>±0.056                | <b>0.355</b><br>± <b>0.055</b> | 0.352<br>±0.036                | 0.195<br>±0.053 | 0.145<br>±0.026 | 0.226<br>±0.058 | 0.171<br>±0.045 | 0.148<br>±0.060  | 0.110<br>±0.037  | 0.160<br>±0.029 | 0.153<br>±0.045 | 0.145<br>±0.049  | 0.136<br>±0.032  | 0.364<br>±0.061                | 0.136<br>±0.014   | 0.262<br>±0.042                | 0.155<br>±0.022   | 0.345<br>±0.055                | 0.174<br>±0.014   | 1767 |
|         | Acc_2    | 0.543<br>±0.086 | 0.545<br>±0.065                | 0.567<br>±0.065                | <b>0.555</b><br>± <b>0.045</b> | 0.383<br>±0.042 | 0.305<br>±0.043 | 0.424<br>±0.052 | 0.302<br>±0.033 | 0.302<br>±0.059  | 0.243<br>±0.059  | 0.327<br>±0.066 | 0.325<br>±0.070 | 0.281<br>±0.064  | 0.281<br>±0.018  | 0.545<br>±0.054                | 0.300<br>±0.042   | 0.400<br>±0.032                | 0.279<br>±0.034   | 0.517<br>±0.054                | 0.312<br>±0.033   | 1768 |
|         | $\kappa$ | 0.314<br>±0.064 | 0.328<br>±0.083                | 0.322<br>±0.074                | 0.358<br>±0.088                | 0.178<br>±0.044 | 0.083<br>±0.102 | 0.217<br>±0.072 | 0.061<br>±0.045 | 0.097<br>±0.118  | -0.042<br>±0.035 | 0.039<br>±0.021 | 0.108<br>±0.028 | 0.000<br>±0.000  | 0.000<br>±0.073  | 0.519<br>±0.062                | 0.111<br>±0.064   | <b>0.531</b><br>± <b>0.015</b> | 0.161<br>±0.036   | 0.544<br>±0.077                | 0.156<br>±0.023   | 1769 |
|         | AUC      | 0.789<br>±0.027 | 0.783<br>±0.048                | 0.754<br>±0.038                | 0.788<br>±0.057                | 0.633<br>±0.025 | 0.576<br>±0.042 | 0.703<br>±0.055 | 0.559<br>±0.036 | 0.618<br>±0.135  | 0.434<br>±0.026  | 0.561<br>±0.014 | 0.596<br>±0.015 | 0.490<br>±0.022  | 0.468<br>±0.039  | 0.868<br>±0.029                | 0.639<br>±0.027   | <b>0.877</b><br>± <b>0.014</b> | 0.650<br>±0.022   | 0.890<br>±0.030                | 0.640<br>±0.015   | 1770 |
|         | BAcc     | 0.412<br>±0.055 | 0.424<br>±0.071                | 0.419<br>±0.063                | 0.450<br>±0.075                | 0.295<br>±0.038 | 0.214<br>±0.087 | 0.329<br>±0.062 | 0.195<br>±0.038 | 0.226<br>±0.101  | 0.107<br>±0.030  | 0.176<br>±0.018 | 0.236<br>±0.024 | 0.143<br>±0.000  | 0.143<br>±0.062  | 0.588<br>±0.053                | 0.238<br>±0.055   | <b>0.598</b><br>± <b>0.013</b> | 0.281<br>±0.031   | 0.610<br>±0.066                | 0.276<br>±0.020   | 1771 |
|         | Acc_1    | 0.412<br>±0.055 | 0.424<br>±0.071                | 0.417<br>±0.066                | 0.450<br>±0.075                | 0.295<br>±0.038 | 0.214<br>±0.087 | 0.329<br>±0.062 | 0.195<br>±0.038 | 0.224<br>±0.106  | 0.105<br>±0.030  | 0.180<br>±0.023 | 0.241<br>±0.022 | 0.143<br>±0.000  | 0.143<br>±0.062  | 0.588<br>±0.053                | 0.238<br>±0.055   | <b>0.598</b><br>± <b>0.013</b> | 0.281<br>±0.031   | 0.618<br>±0.065                | 0.276<br>±0.020   | 1772 |
| sub7    | Acc_2    | 0.660<br>±0.040 | 0.629<br>±0.077                | 0.605<br>±0.039                | 0.633<br>±0.097                | 0.448<br>±0.040 | 0.350<br>±0.060 | 0.529<br>±0.068 | 0.355<br>±0.044 | 0.419<br>±0.145  | 0.217<br>±0.042  | 0.342<br>±0.022 | 0.397<br>±0.028 | 0.286<br>±0.000  | 0.248<br>±0.062  | <b>0.812</b><br>± <b>0.033</b> | 0.400<br>±0.054   | 0.798<br>±0.017                | 0.476<br>±0.022   | 0.826<br>±0.044                | 0.424<br>±0.035   | 1773 |
|         | $\kappa$ | 0.186<br>±0.070 | 0.192<br>±0.072                | <b>0.189</b><br>± <b>0.067</b> | 0.164<br>±0.074                | 0.014<br>±0.037 | 0.022<br>±0.066 | 0.058<br>±0.089 | 0.028<br>±0.080 | -0.014<br>±0.033 | -0.033<br>±0.032 | 0.008<br>±0.025 | 0.047<br>±0.029 | -0.011<br>±0.018 | -0.006<br>±0.049 | 0.186<br>±0.045                | 0.050<br>±0.040   | 0.156<br>±0.058                | 0.075<br>±0.012   | 0.192<br>±0.027                | 0.050<br>±0.049   | 1774 |
|         | AUC      | 0.689<br>±0.042 | 0.678<br>±0.063                | <b>0.683</b><br>± <b>0.045</b> | 0.665<br>±0.068                | 0.538<br>±0.032 | 0.530<br>±0.038 | 0.563<br>±0.069 | 0.535<br>±0.062 | 0.480<br>±0.028  | 0.458<br>±0.033  | 0.503<br>±0.042 | 0.533<br>±0.031 | 0.492<br>±0.036  | 0.516<br>±0.041  | 0.669<br>±0.062                | 0.559<br>±0.041   | 0.654<br>±0.032                | 0.579<br>±0.046   | 0.680<br>±0.040                | 0.570<br>±0.044   | 1775 |
|         | BAcc     | 0.302<br>±0.060 | 0.307<br>±0.062                | <b>0.305</b><br>± <b>0.057</b> | 0.283<br>±0.063                | 0.155<br>±0.031 | 0.162<br>±0.056 | 0.193<br>±0.076 | 0.167<br>±0.068 | 0.131<br>±0.028  | 0.114<br>±0.027  | 0.150<br>±0.022 | 0.183<br>±0.025 | 0.133<br>±0.016  | 0.138<br>±0.042  | 0.302<br>±0.038                | 0.186<br>±0.034   | 0.276<br>±0.050                | 0.207<br>±0.011   | 0.307<br>±0.023                | 0.186<br>±0.042   | 1776 |

Continued on next page

| SubjectMetric |          | DeepConvnet                    | EEGNet                         | Conformer                      | CTNet                          | BIOT (f)        | BIOT (l)         | BENDR (f)       | BENDR (l)       | CBraMod (f)      | CBraMod (l)      | EEGPT (f)       | EEGPT (l)       | LaBraM (f)       | LaBraM (l)       | STEEGformer-s (f)              | STEEGformer-s (l) | STEEGformer-b (f) | STEEGformer-b (l) | STEEGformer-l (f) | STEEGformer-l (l) |
|---------------|----------|--------------------------------|--------------------------------|--------------------------------|--------------------------------|-----------------|------------------|-----------------|-----------------|------------------|------------------|-----------------|-----------------|------------------|------------------|--------------------------------|-------------------|-------------------|-------------------|-------------------|-------------------|
| sub8          | Acc.1    | 0.302<br>±0.060                | <b>0.307</b><br>± <b>0.062</b> | 0.305<br>±0.057                | 0.283<br>±0.063                | 0.155<br>±0.031 | 0.162<br>±0.056  | 0.193<br>±0.076 | 0.164<br>±0.069 | 0.131<br>±0.028  | 0.114<br>±0.027  | 0.147<br>±0.025 | 0.180<br>±0.025 | 0.133<br>±0.016  | 0.138<br>±0.042  | 0.302<br>±0.038                | 0.188<br>±0.035   | 0.276<br>±0.050   | 0.210<br>±0.016   | 0.312<br>± 0.019  | 0.188<br>±0.040   |
|               | Acc.2    | 0.519<br>± 0.066               | 0.493<br>±0.054                | 0.500<br>±0.074                | <b>0.507</b><br>± <b>0.083</b> | 0.326<br>±0.068 | 0.307<br>±0.054  | 0.355<br>±0.121 | 0.314<br>±0.078 | 0.260<br>±0.057  | 0.240<br>±0.042  | 0.292<br>±0.068 | 0.316<br>±0.057 | 0.302<br>±0.023  | 0.290<br>±0.056  | 0.505<br>±0.094                | 0.362<br>±0.080   | 0.476<br>±0.025   | 0.348<br>±0.041   | 0.504<br>±0.063   | 0.333<br>±0.039   |
|               | $\kappa$ | 0.256<br>± 0.061               | 0.219<br>±0.069                | 0.222<br>±0.051                | <b>0.244</b><br>± <b>0.077</b> | 0.039<br>±0.043 | -0.019<br>±0.021 | 0.119<br>±0.075 | 0.014<br>±0.038 | -0.056<br>±0.026 | -0.067<br>±0.023 | 0.064<br>±0.107 | 0.047<br>±0.040 | -0.036<br>±0.041 | -0.075<br>±0.032 | 0.147<br>±0.046                | 0.042<br>±0.022   | 0.158<br>±0.049   | 0.036<br>±0.029   | 0.228<br>±0.043   | 0.061<br>±0.025   |
|               | AUC      | <b>0.718</b><br>± <b>0.061</b> | 0.705<br>±0.048                | 0.689<br>±0.030                | 0.725<br>± 0.034               | 0.551<br>±0.029 | 0.500<br>±0.021  | 0.619<br>±0.021 | 0.519<br>±0.046 | 0.406<br>±0.045  | 0.415<br>±0.021  | 0.538<br>±0.051 | 0.555<br>±0.035 | 0.446<br>±0.034  | 0.410<br>±0.010  | 0.644<br>±0.042                | 0.535<br>±0.034   | 0.648<br>±0.025   | 0.532<br>±0.022   | 0.696<br>±0.030   | 0.577<br>±0.014   |
|               | BAcc     | 0.362<br>± 0.052               | 0.331<br>±0.059                | 0.333<br>±0.044                | <b>0.352</b><br>± <b>0.066</b> | 0.176<br>±0.037 | 0.126<br>±0.018  | 0.245<br>±0.064 | 0.155<br>±0.033 | 0.095<br>±0.022  | 0.086<br>±0.020  | 0.198<br>±0.092 | 0.183<br>±0.034 | 0.112<br>±0.035  | 0.079<br>±0.027  | 0.269<br>±0.039                | 0.179<br>±0.019   | 0.279<br>±0.042   | 0.174<br>±0.025   | 0.338<br>±0.037   | 0.195<br>±0.022   |
|               | Acc.1    | 0.362<br>± 0.052               | 0.331<br>±0.059                | 0.333<br>±0.044                | <b>0.355</b><br>± <b>0.066</b> | 0.176<br>±0.037 | 0.126<br>±0.018  | 0.245<br>±0.064 | 0.155<br>±0.033 | 0.095<br>±0.022  | 0.086<br>±0.020  | 0.194<br>±0.089 | 0.183<br>±0.039 | 0.112<br>±0.035  | 0.079<br>±0.027  | 0.269<br>±0.039                | 0.179<br>±0.019   | 0.279<br>±0.042   | 0.174<br>±0.025   | 0.333<br>±0.042   | 0.195<br>±0.022   |
| sub9          | Acc.2    | 0.548<br>± 0.061               | 0.524<br>±0.058                | <b>0.536</b><br>± <b>0.073</b> | 0.524<br>±0.039                | 0.343<br>±0.063 | 0.281<br>±0.034  | 0.421<br>±0.043 | 0.319<br>±0.091 | 0.202<br>±0.048  | 0.217<br>±0.049  | 0.332<br>±0.057 | 0.328<br>±0.030 | 0.231<br>±0.043  | 0.190<br>±0.022  | 0.469<br>±0.053                | 0.338<br>±0.031   | 0.474<br>±0.021   | 0.331<br>±0.026   | 0.525<br>±0.043   | 0.355<br>±0.033   |
|               | $\kappa$ | 0.167<br>±0.051                | 0.211<br>±0.071                | 0.206<br>±0.018                | 0.178<br>±0.058                | 0.106<br>±0.073 | 0.003<br>±0.021  | 0.117<br>±0.038 | 0.072<br>±0.033 | 0.072<br>±0.045  | -0.064<br>±0.021 | 0.069<br>±0.056 | 0.067<br>±0.062 | -0.017<br>±0.033 | -0.028<br>±0.045 | <b>0.378</b><br>± <b>0.057</b> | 0.125<br>±0.061   | 0.394<br>± 0.098  | 0.131<br>±0.074   | 0.222<br>±0.057   | 0.100<br>±0.072   |
|               | AUC      | 0.705<br>±0.032                | 0.708<br>±0.038                | 0.686<br>±0.016                | 0.704<br>±0.011                | 0.568<br>±0.052 | 0.519<br>±0.035  | 0.627<br>±0.030 | 0.563<br>±0.033 | 0.580<br>±0.031  | 0.427<br>±0.022  | 0.569<br>±0.037 | 0.571<br>±0.033 | 0.458<br>±0.015  | 0.449<br>±0.022  | <b>0.764</b><br>± <b>0.026</b> | 0.626<br>±0.042   | 0.803<br>± 0.037  | 0.637<br>±0.050   | 0.678<br>±0.031   | 0.623<br>±0.047   |
|               | BAcc     | 0.286<br>±0.044                | 0.324<br>±0.061                | 0.319<br>±0.016                | 0.295<br>±0.049                | 0.233<br>±0.062 | 0.145<br>±0.018  | 0.243<br>±0.032 | 0.205<br>±0.028 | 0.205<br>±0.039  | 0.088<br>±0.018  | 0.202<br>±0.048 | 0.200<br>±0.053 | 0.129<br>±0.028  | 0.119<br>±0.039  | <b>0.467</b><br>± <b>0.049</b> | 0.250<br>±0.052   | 0.481<br>± 0.084  | 0.255<br>±0.063   | 0.333<br>±0.049   | 0.229<br>±0.062   |
|               | Acc.1    | 0.286<br>±0.044                | 0.324<br>±0.061                | 0.321<br>±0.015                | 0.295<br>±0.049                | 0.233<br>±0.062 | 0.145<br>±0.018  | 0.243<br>±0.032 | 0.205<br>±0.028 | 0.205<br>±0.039  | 0.088<br>±0.018  | 0.211<br>±0.052 | 0.207<br>±0.056 | 0.129<br>±0.028  | 0.117<br>±0.035  | <b>0.467</b><br>± <b>0.049</b> | 0.250<br>±0.052   | 0.481<br>± 0.084  | 0.255<br>±0.063   | 0.337<br>±0.054   | 0.229<br>±0.062   |
|               | Acc.2    | 0.514<br>±0.036                | 0.569<br>±0.037                | 0.519<br>±0.050                | 0.498<br>±0.031                | 0.407<br>±0.072 | 0.298<br>±0.046  | 0.445<br>±0.048 | 0.386<br>±0.072 | 0.376<br>±0.014  | 0.207<br>±0.040  | 0.375<br>±0.048 | 0.385<br>±0.063 | 0.245<br>±0.027  | 0.224<br>±0.042  | <b>0.624</b><br>± <b>0.027</b> | 0.414<br>±0.062   | 0.681<br>± 0.064  | 0.438<br>±0.057   | 0.540<br>±0.043   | 0.436<br>±0.094   |



## C.2.2 PER-SUBJECT ZERO-SHOT TRANSFER

Table 19: Average Zero-Shot Transfer Performance Across All Subjects

| Model (Training strategy) | $\kappa$     | AUC          | BAcc         | Acc.1        | Acc.2        |
|---------------------------|--------------|--------------|--------------|--------------|--------------|
|                           | 0.061        | <b>0.575</b> | 0.195        | 0.195        | 0.361        |
| <b>DeepConvnet</b>        | $\pm 0.015$  | $\pm 0.020$  | $\pm 0.013$  | $\pm 0.013$  | $\pm 0.022$  |
|                           | 0.062        | 0.576        | 0.196        | 0.196        | <b>0.366</b> |
| <b>EEGNet</b>             | $\pm 0.015$  | $\pm 0.018$  | $\pm 0.013$  | $\pm 0.013$  | $\pm 0.019$  |
|                           | 0.065        | <b>0.567</b> | 0.199        | 0.199        | 0.364        |
| <b>Conformer</b>          | $\pm 0.016$  | $\pm 0.019$  | $\pm 0.014$  | $\pm 0.014$  | $\pm 0.023$  |
|                           | 0.062        | 0.573        | 0.196        | 0.196        | 0.360        |
| <b>CTNet</b>              | $\pm 0.014$  | $\pm 0.016$  | $\pm 0.012$  | $\pm 0.012$  | $\pm 0.018$  |
|                           | 0.007        | 0.512        | 0.149        | 0.149        | 0.294        |
| <b>BIOT (f)</b>           | $\pm 0.007$  | $\pm 0.011$  | $\pm 0.006$  | $\pm 0.006$  | $\pm 0.008$  |
|                           | 0.004        | 0.512        | 0.147        | 0.147        | 0.290        |
| <b>BIOT (l)</b>           | $\pm 0.004$  | $\pm 0.011$  | $\pm 0.003$  | $\pm 0.003$  | $\pm 0.004$  |
|                           | 0.036        | 0.538        | 0.174        | 0.174        | 0.327        |
| <b>BENDR (f)</b>          | $\pm 0.013$  | $\pm 0.012$  | $\pm 0.011$  | $\pm 0.011$  | $\pm 0.014$  |
|                           | 0.013        | 0.514        | 0.154        | 0.154        | 0.300        |
| <b>BENDR (l)</b>          | $\pm 0.008$  | $\pm 0.005$  | $\pm 0.006$  | $\pm 0.006$  | $\pm 0.008$  |
|                           | 0.005        | 0.505        | 0.147        | 0.147        | 0.290        |
| <b>CBraMod (f)</b>        | $\pm 0.008$  | $\pm 0.010$  | $\pm 0.007$  | $\pm 0.007$  | $\pm 0.008$  |
|                           | -0.002       | 0.499        | 0.141        | 0.141        | 0.284        |
| <b>CBraMod (l)</b>        | $\pm 0.003$  | $\pm 0.006$  | $\pm 0.003$  | $\pm 0.003$  | $\pm 0.003$  |
|                           | 0.008        | 0.510        | 0.150        | 0.150        | 0.296        |
| <b>EEGPT (f)</b>          | $\pm 0.004$  | $\pm 0.005$  | $\pm 0.004$  | $\pm 0.004$  | $\pm 0.005$  |
|                           | 0.009        | 0.516        | 0.151        | 0.151        | 0.299        |
| <b>EEGPT (l)</b>          | $\pm 0.005$  | $\pm 0.008$  | $\pm 0.005$  | $\pm 0.005$  | $\pm 0.009$  |
|                           | 0.002        | 0.504        | 0.145        | 0.144        | 0.287        |
| <b>LaBraM (f)</b>         | $\pm 0.004$  | $\pm 0.007$  | $\pm 0.004$  | $\pm 0.004$  | $\pm 0.007$  |
|                           | 0.003        | 0.503        | 0.145        | 0.145        | 0.287        |
| <b>LaBraM (l)</b>         | $\pm 0.003$  | $\pm 0.006$  | $\pm 0.003$  | $\pm 0.003$  | $\pm 0.003$  |
|                           | <b>0.070</b> | 0.566        | <b>0.203</b> | <b>0.203</b> | 0.364        |
| <b>STEEGformer-s (f)</b>  | $\pm 0.019$  | $\pm 0.014$  | $\pm 0.016$  | $\pm 0.016$  | $\pm 0.025$  |
|                           | 0.015        | 0.525        | 0.155        | 0.155        | 0.302        |
| <b>STEEGformer-s (l)</b>  | $\pm 0.008$  | $\pm 0.012$  | $\pm 0.007$  | $\pm 0.007$  | $\pm 0.007$  |
|                           | 0.061        | 0.564        | 0.195        | 0.195        | 0.349        |
| <b>STEEGformer-b (f)</b>  | $\pm 0.020$  | $\pm 0.019$  | $\pm 0.017$  | $\pm 0.017$  | $\pm 0.021$  |
|                           | 0.016        | 0.530        | 0.157        | 0.157        | 0.305        |
| <b>STEEGformer-b (l)</b>  | $\pm 0.008$  | $\pm 0.013$  | $\pm 0.007$  | $\pm 0.007$  | $\pm 0.009$  |
|                           | 0.071        | 0.572        | 0.204        | 0.204        | 0.366        |
| <b>STEEGformer-l (f)</b>  | $\pm 0.021$  | $\pm 0.019$  | $\pm 0.018$  | $\pm 0.018$  | $\pm 0.027$  |
|                           | 0.015        | 0.533        | 0.156        | 0.156        | 0.306        |
| <b>STEEGformer-l (l)</b>  | $\pm 0.008$  | $\pm 0.016$  | $\pm 0.007$  | $\pm 0.007$  | $\pm 0.009$  |

Table 20: Per-Subject Zero-Shot Transfer Performance

| Subject | Metric           | DeepConvnet                 | EEGNet                      | Conformer                   | CTNet                       | BIOT (f)              | BIOT (l)              | BENDR (f)            | BENDR (l)            | CBraMod (f)          | CBraMod (l)           | EEGPT (f)            | EEGPT (l)            | LaBraM (f)            | LaBraM (l)           | STEEGformer-s (f)           | STEEGformer-s (l)    | STEEGformer-b (f)    | STEEGformer-b (l)    | STEEGformer-l (f)           | STEEGformer-l (l)    |
|---------|------------------|-----------------------------|-----------------------------|-----------------------------|-----------------------------|-----------------------|-----------------------|----------------------|----------------------|----------------------|-----------------------|----------------------|----------------------|-----------------------|----------------------|-----------------------------|----------------------|----------------------|----------------------|-----------------------------|----------------------|
| sub1    | $\kappa$         | 0.056<br>$\pm 0.030$        | 0.048<br>$\pm 0.018$        | 0.059<br>$\pm 0.029$        | 0.061<br>$\pm 0.032$        | 0.008<br>$\pm 0.011$  | 0.005<br>$\pm 0.009$  | 0.033<br>$\pm 0.029$ | 0.000<br>$\pm 0.021$ | 0.003<br>$\pm 0.005$ | -0.001<br>$\pm 0.003$ | 0.001<br>$\pm 0.021$ | 0.010<br>$\pm 0.017$ | -0.001<br>$\pm 0.006$ | 0.000<br>$\pm 0.006$ | 0.081<br>$\pm 0.028$        | 0.021<br>$\pm 0.017$ | 0.054<br>$\pm 0.042$ | 0.016<br>$\pm 0.021$ | <b>0.080</b><br>$\pm 0.044$ | 0.017<br>$\pm 0.021$ |
|         | AUC              | 0.573<br>$\pm 0.026$        | 0.569<br>$\pm 0.022$        | 0.555<br>$\pm 0.026$        | <b>0.575</b><br>$\pm 0.024$ | 0.512<br>$\pm 0.021$  | 0.518<br>$\pm 0.017$  | 0.538<br>$\pm 0.022$ | 0.511<br>$\pm 0.017$ | 0.500<br>$\pm 0.023$ | 0.504<br>$\pm 0.021$  | 0.501<br>$\pm 0.013$ | 0.513<br>$\pm 0.016$ | 0.493<br>$\pm 0.012$  | 0.495<br>$\pm 0.020$ | 0.567<br>$\pm 0.023$        | 0.532<br>$\pm 0.027$ | 0.557<br>$\pm 0.030$ | 0.531<br>$\pm 0.026$ | 0.576<br>$\pm 0.034$        | 0.542<br>$\pm 0.033$ |
|         | BAcc             | 0.191<br>$\pm 0.025$        | 0.184<br>$\pm 0.016$        | 0.193<br>$\pm 0.025$        | 0.195<br>$\pm 0.028$        | 0.149<br>$\pm 0.009$  | 0.147<br>$\pm 0.008$  | 0.171<br>$\pm 0.025$ | 0.143<br>$\pm 0.018$ | 0.145<br>$\pm 0.004$ | 0.142<br>$\pm 0.002$  | 0.144<br>$\pm 0.018$ | 0.151<br>$\pm 0.014$ | 0.142<br>$\pm 0.005$  | 0.143<br>$\pm 0.005$ | 0.212<br>$\pm 0.024$        | 0.161<br>$\pm 0.015$ | 0.189<br>$\pm 0.036$ | 0.157<br>$\pm 0.018$ | <b>0.212</b><br>$\pm 0.038$ | 0.157<br>$\pm 0.018$ |
|         | Acc <sub>1</sub> | 0.191<br>$\pm 0.026$        | 0.184<br>$\pm 0.016$        | 0.193<br>$\pm 0.025$        | 0.195<br>$\pm 0.027$        | 0.149<br>$\pm 0.009$  | 0.147<br>$\pm 0.008$  | 0.171<br>$\pm 0.025$ | 0.143<br>$\pm 0.018$ | 0.145<br>$\pm 0.004$ | 0.142<br>$\pm 0.002$  | 0.143<br>$\pm 0.018$ | 0.152<br>$\pm 0.016$ | 0.142<br>$\pm 0.006$  | 0.143<br>$\pm 0.005$ | <b>0.213</b><br>$\pm 0.024$ | 0.161<br>$\pm 0.015$ | 0.189<br>$\pm 0.036$ | 0.157<br>$\pm 0.018$ | 0.213<br>$\pm 0.038$        | 0.157<br>$\pm 0.018$ |
|         | Acc <sub>2</sub> | 0.368<br>$\pm 0.028$        | 0.356<br>$\pm 0.031$        | 0.353<br>$\pm 0.027$        | 0.363<br>$\pm 0.028$        | 0.293<br>$\pm 0.018$  | 0.287<br>$\pm 0.012$  | 0.335<br>$\pm 0.031$ | 0.295<br>$\pm 0.024$ | 0.287<br>$\pm 0.011$ | 0.286<br>$\pm 0.001$  | 0.288<br>$\pm 0.026$ | 0.300<br>$\pm 0.017$ | 0.285<br>$\pm 0.006$  | 0.283<br>$\pm 0.006$ | <b>0.376</b><br>$\pm 0.034$ | 0.306<br>$\pm 0.012$ | 0.347<br>$\pm 0.035$ | 0.302<br>$\pm 0.016$ | 0.381<br>$\pm 0.050$        | 0.310<br>$\pm 0.020$ |
| sub10   | $\kappa$         | <b>0.079</b><br>$\pm 0.029$ | 0.078<br>$\pm 0.028$        | 0.071<br>$\pm 0.040$        | 0.079<br>$\pm 0.033$        | -0.001<br>$\pm 0.015$ | -0.001<br>$\pm 0.008$ | 0.044<br>$\pm 0.021$ | 0.022<br>$\pm 0.029$ | 0.001<br>$\pm 0.020$ | -0.002<br>$\pm 0.008$ | 0.008<br>$\pm 0.023$ | 0.005<br>$\pm 0.016$ | 0.012<br>$\pm 0.013$  | 0.006<br>$\pm 0.009$ | 0.083<br>$\pm 0.032$        | 0.008<br>$\pm 0.018$ | 0.054<br>$\pm 0.029$ | 0.014<br>$\pm 0.011$ | 0.061<br>$\pm 0.031$        | 0.009<br>$\pm 0.017$ |
|         | AUC              | <b>0.590</b><br>$\pm 0.028$ | 0.594<br>$\pm 0.025$        | 0.573<br>$\pm 0.034$        | 0.590<br>$\pm 0.024$        | 0.501<br>$\pm 0.010$  | 0.497<br>$\pm 0.014$  | 0.549<br>$\pm 0.020$ | 0.518<br>$\pm 0.012$ | 0.500<br>$\pm 0.016$ | 0.499<br>$\pm 0.033$  | 0.511<br>$\pm 0.019$ | 0.507<br>$\pm 0.015$ | 0.513<br>$\pm 0.015$  | 0.497<br>$\pm 0.015$ | 0.574<br>$\pm 0.023$        | 0.510<br>$\pm 0.015$ | 0.561<br>$\pm 0.025$ | 0.520<br>$\pm 0.020$ | 0.562<br>$\pm 0.027$        | 0.515<br>$\pm 0.022$ |
|         | BAcc             | <b>0.211</b><br>$\pm 0.025$ | 0.210<br>$\pm 0.024$        | 0.204<br>$\pm 0.034$        | 0.211<br>$\pm 0.028$        | 0.142<br>$\pm 0.013$  | 0.142<br>$\pm 0.007$  | 0.181<br>$\pm 0.018$ | 0.161<br>$\pm 0.025$ | 0.144<br>$\pm 0.017$ | 0.141<br>$\pm 0.007$  | 0.150<br>$\pm 0.019$ | 0.147<br>$\pm 0.014$ | 0.153<br>$\pm 0.011$  | 0.148<br>$\pm 0.008$ | 0.214<br>$\pm 0.027$        | 0.149<br>$\pm 0.015$ | 0.189<br>$\pm 0.025$ | 0.155<br>$\pm 0.010$ | 0.195<br>$\pm 0.026$        | 0.150<br>$\pm 0.015$ |
|         | Acc <sub>1</sub> | <b>0.211</b><br>$\pm 0.025$ | 0.210<br>$\pm 0.024$        | 0.203<br>$\pm 0.034$        | 0.211<br>$\pm 0.028$        | 0.142<br>$\pm 0.013$  | 0.142<br>$\pm 0.007$  | 0.181<br>$\pm 0.018$ | 0.161<br>$\pm 0.025$ | 0.144<br>$\pm 0.017$ | 0.141<br>$\pm 0.007$  | 0.151<br>$\pm 0.019$ | 0.147<br>$\pm 0.014$ | 0.153<br>$\pm 0.011$  | 0.149<br>$\pm 0.008$ | 0.214<br>$\pm 0.027$        | 0.149<br>$\pm 0.015$ | 0.189<br>$\pm 0.024$ | 0.155<br>$\pm 0.010$ | 0.196<br>$\pm 0.029$        | 0.150<br>$\pm 0.015$ |
|         | Acc <sub>2</sub> | 0.375<br>$\pm 0.034$        | 0.388<br>$\pm 0.031$        | 0.374<br>$\pm 0.042$        | <b>0.381</b><br>$\pm 0.026$ | 0.279<br>$\pm 0.015$  | 0.284<br>$\pm 0.009$  | 0.337<br>$\pm 0.022$ | 0.308<br>$\pm 0.025$ | 0.286<br>$\pm 0.024$ | 0.285<br>$\pm 0.007$  | 0.294<br>$\pm 0.027$ | 0.285<br>$\pm 0.020$ | 0.296<br>$\pm 0.016$  | 0.290<br>$\pm 0.009$ | 0.379<br>$\pm 0.034$        | 0.298<br>$\pm 0.016$ | 0.351<br>$\pm 0.029$ | 0.297<br>$\pm 0.011$ | 0.353<br>$\pm 0.037$        | 0.299<br>$\pm 0.019$ |
| sub11   | $\kappa$         | 0.062<br>$\pm 0.024$        | 0.079<br>$\pm 0.034$        | <b>0.075</b><br>$\pm 0.031$ | 0.065<br>$\pm 0.024$        | 0.002<br>$\pm 0.016$  | 0.006<br>$\pm 0.012$  | 0.024<br>$\pm 0.020$ | 0.008<br>$\pm 0.020$ | 0.009<br>$\pm 0.016$ | 0.001<br>$\pm 0.010$  | 0.011<br>$\pm 0.016$ | 0.004<br>$\pm 0.015$ | -0.004<br>$\pm 0.013$ | 0.003<br>$\pm 0.008$ | 0.069<br>$\pm 0.057$        | 0.002<br>$\pm 0.013$ | 0.058<br>$\pm 0.048$ | 0.005<br>$\pm 0.022$ | 0.051<br>$\pm 0.045$        | 0.005<br>$\pm 0.020$ |
|         | AUC              | 0.593<br>$\pm 0.022$        | <b>0.590</b><br>$\pm 0.033$ | 0.583<br>$\pm 0.030$        | 0.579<br>$\pm 0.018$        | 0.505<br>$\pm 0.016$  | 0.499<br>$\pm 0.019$  | 0.533<br>$\pm 0.016$ | 0.512<br>$\pm 0.016$ | 0.500<br>$\pm 0.016$ | 0.510<br>$\pm 0.021$  | 0.518<br>$\pm 0.011$ | 0.504<br>$\pm 0.016$ | 0.499<br>$\pm 0.019$  | 0.505<br>$\pm 0.017$ | 0.563<br>$\pm 0.046$        | 0.517<br>$\pm 0.021$ | 0.551<br>$\pm 0.040$ | 0.528<br>$\pm 0.018$ | 0.549<br>$\pm 0.033$        | 0.521<br>$\pm 0.021$ |
|         | BAcc             | 0.196<br>$\pm 0.021$        | 0.211<br>$\pm 0.029$        | <b>0.207</b><br>$\pm 0.026$ | 0.198<br>$\pm 0.021$        | 0.144<br>$\pm 0.014$  | 0.148<br>$\pm 0.010$  | 0.163<br>$\pm 0.017$ | 0.149<br>$\pm 0.017$ | 0.151<br>$\pm 0.014$ | 0.144<br>$\pm 0.008$  | 0.152<br>$\pm 0.014$ | 0.146<br>$\pm 0.013$ | 0.140<br>$\pm 0.011$  | 0.145<br>$\pm 0.007$ | 0.202<br>$\pm 0.048$        | 0.144<br>$\pm 0.011$ | 0.193<br>$\pm 0.041$ | 0.147<br>$\pm 0.019$ | 0.187<br>$\pm 0.039$        | 0.147<br>$\pm 0.017$ |
|         | Acc <sub>1</sub> | 0.196<br>$\pm 0.021$        | 0.211<br>$\pm 0.029$        | <b>0.207</b><br>$\pm 0.026$ | 0.198<br>$\pm 0.021$        | 0.144<br>$\pm 0.014$  | 0.148<br>$\pm 0.010$  | 0.163<br>$\pm 0.017$ | 0.149<br>$\pm 0.017$ | 0.151<br>$\pm 0.014$ | 0.144<br>$\pm 0.009$  | 0.152<br>$\pm 0.014$ | 0.145<br>$\pm 0.013$ | 0.140<br>$\pm 0.011$  | 0.145<br>$\pm 0.007$ | 0.202<br>$\pm 0.048$        | 0.144<br>$\pm 0.011$ | 0.193<br>$\pm 0.041$ | 0.147<br>$\pm 0.019$ | 0.187<br>$\pm 0.040$        | 0.147<br>$\pm 0.017$ |
|         | Acc <sub>2</sub> | 0.364<br>$\pm 0.024$        | 0.384<br>$\pm 0.049$        | <b>0.379</b><br>$\pm 0.037$ | 0.372<br>$\pm 0.036$        | 0.287<br>$\pm 0.016$  | 0.287<br>$\pm 0.010$  | 0.321<br>$\pm 0.022$ | 0.293<br>$\pm 0.020$ | 0.287<br>$\pm 0.013$ | 0.289<br>$\pm 0.011$  | 0.292<br>$\pm 0.011$ | 0.283<br>$\pm 0.022$ | 0.274<br>$\pm 0.013$  | 0.286<br>$\pm 0.007$ | 0.356<br>$\pm 0.046$        | 0.290<br>$\pm 0.014$ | 0.342<br>$\pm 0.046$ | 0.307<br>$\pm 0.018$ | 0.336<br>$\pm 0.051$        | 0.297<br>$\pm 0.010$ |

Continued on next page

| Subject                | Metric   | DeepConvnet                 | EEGNet                      | Conformer                   | CTNet                       | BIOT (f)             | BIOT (l)             | BENDR (f)            | BENDR (l)            | CBraMod (f)          | CBraMod (l)           | EEGPT (f)             | EEGPT (l)            | LaBraM (f)            | LaBraM (l)            | STEEGformer-s (f)    | STEEGformer-s (l)    | STEEGformer-b (f)           | STEEGformer-b (l)           | STEEGformer-l (f)    | STEEGformer-l (l)           |
|------------------------|----------|-----------------------------|-----------------------------|-----------------------------|-----------------------------|----------------------|----------------------|----------------------|----------------------|----------------------|-----------------------|-----------------------|----------------------|-----------------------|-----------------------|----------------------|----------------------|-----------------------------|-----------------------------|----------------------|-----------------------------|
| sub12                  | $\kappa$ | 0.061<br>$\pm 0.033$        | 0.058<br>$\pm 0.036$        | <b>0.066</b><br>$\pm 0.038$ | 0.059<br>$\pm 0.033$        | 0.011<br>$\pm 0.016$ | 0.005<br>$\pm 0.014$ | 0.035<br>$\pm 0.023$ | 0.009<br>$\pm 0.018$ | 0.007<br>$\pm 0.013$ | -0.003<br>$\pm 0.009$ | 0.003<br>$\pm 0.012$  | 0.006<br>$\pm 0.021$ | 0.007<br>$\pm 0.011$  | 0.008<br>$\pm 0.013$  | 0.065<br>$\pm 0.043$ | 0.016<br>$\pm 0.020$ | 0.054<br>$\pm 0.031$        | 0.027<br>$\pm 0.024$        | 0.073<br>$\pm 0.041$ | 0.026<br>$\pm 0.024$        |
|                        | AUC      | 0.572<br>$\pm 0.035$        | 0.570<br>$\pm 0.029$        | 0.567<br>$\pm 0.029$        | 0.572<br>$\pm 0.027$        | 0.517<br>$\pm 0.011$ | 0.527<br>$\pm 0.018$ | 0.538<br>$\pm 0.022$ | 0.516<br>$\pm 0.017$ | 0.512<br>$\pm 0.017$ | 0.507<br>$\pm 0.025$  | 0.506<br>$\pm 0.017$  | 0.514<br>$\pm 0.015$ | 0.521<br>$\pm 0.016$  | 0.515<br>$\pm 0.014$  | 0.565<br>$\pm 0.030$ | 0.529<br>$\pm 0.021$ | <b>0.573</b><br>$\pm 0.026$ | 0.534<br>$\pm 0.022$        | 0.581<br>$\pm 0.033$ | 0.539<br>$\pm 0.027$        |
|                        | BAcc     | 0.195<br>$\pm 0.028$        | 0.193<br>$\pm 0.031$        | <b>0.200</b><br>$\pm 0.032$ | 0.194<br>$\pm 0.028$        | 0.152<br>$\pm 0.014$ | 0.147<br>$\pm 0.012$ | 0.173<br>$\pm 0.020$ | 0.151<br>$\pm 0.015$ | 0.148<br>$\pm 0.011$ | 0.140<br>$\pm 0.008$  | 0.146<br>$\pm 0.010$  | 0.148<br>$\pm 0.018$ | 0.148<br>$\pm 0.010$  | 0.150<br>$\pm 0.011$  | 0.199<br>$\pm 0.037$ | 0.157<br>$\pm 0.017$ | 0.189<br>$\pm 0.026$        | 0.166<br>$\pm 0.020$        | 0.205<br>$\pm 0.035$ | 0.165<br>$\pm 0.021$        |
|                        | Acc_1    | 0.195<br>$\pm 0.028$        | 0.193<br>$\pm 0.031$        | <b>0.200</b><br>$\pm 0.032$ | 0.194<br>$\pm 0.028$        | 0.152<br>$\pm 0.014$ | 0.147<br>$\pm 0.012$ | 0.173<br>$\pm 0.020$ | 0.150<br>$\pm 0.015$ | 0.149<br>$\pm 0.011$ | 0.140<br>$\pm 0.008$  | 0.147<br>$\pm 0.009$  | 0.151<br>$\pm 0.019$ | 0.148<br>$\pm 0.010$  | 0.150<br>$\pm 0.011$  | 0.199<br>$\pm 0.037$ | 0.156<br>$\pm 0.017$ | 0.189<br>$\pm 0.026$        | 0.166<br>$\pm 0.020$        | 0.205<br>$\pm 0.037$ | 0.165<br>$\pm 0.021$        |
|                        | Acc_2    | 0.357<br>$\pm 0.038$        | 0.357<br>$\pm 0.033$        | 0.355<br>$\pm 0.036$        | <b>0.358</b><br>$\pm 0.027$ | 0.295<br>$\pm 0.019$ | 0.290<br>$\pm 0.011$ | 0.330<br>$\pm 0.032$ | 0.296<br>$\pm 0.019$ | 0.293<br>$\pm 0.011$ | 0.285<br>$\pm 0.007$  | 0.299<br>$\pm 0.020$  | 0.298<br>$\pm 0.025$ | 0.304<br>$\pm 0.013$  | 0.292<br>$\pm 0.012$  | 0.349<br>$\pm 0.050$ | 0.306<br>$\pm 0.015$ | 0.338<br>$\pm 0.034$        | 0.314<br>$\pm 0.021$        | 0.373<br>$\pm 0.041$ | 0.316<br>$\pm 0.023$        |
|                        | sub13    | $\kappa$                    | <b>0.069</b><br>$\pm 0.024$ | 0.069<br>$\pm 0.022$        | 0.067<br>$\pm 0.023$        | 0.056<br>$\pm 0.024$ | 0.010<br>$\pm 0.015$ | 0.002<br>$\pm 0.005$ | 0.032<br>$\pm 0.019$ | 0.012<br>$\pm 0.020$ | -0.005<br>$\pm 0.020$ | -0.003<br>$\pm 0.012$ | 0.011<br>$\pm 0.022$ | -0.001<br>$\pm 0.015$ | 0.004<br>$\pm 0.008$  | 0.004<br>$\pm 0.008$ | 0.035<br>$\pm 0.020$ | 0.007<br>$\pm 0.013$        | 0.019<br>$\pm 0.021$        | 0.010<br>$\pm 0.012$ | 0.052<br>$\pm 0.027$        |
| AUC                    |          | <b>0.585</b><br>$\pm 0.029$ | 0.592<br>$\pm 0.027$        | 0.577<br>$\pm 0.025$        | 0.573<br>$\pm 0.021$        | 0.510<br>$\pm 0.020$ | 0.504<br>$\pm 0.018$ | 0.538<br>$\pm 0.017$ | 0.519<br>$\pm 0.013$ | 0.496<br>$\pm 0.013$ | 0.500<br>$\pm 0.016$  | 0.507<br>$\pm 0.020$  | 0.508<br>$\pm 0.014$ | 0.504<br>$\pm 0.012$  | 0.506<br>$\pm 0.014$  | 0.544<br>$\pm 0.021$ | 0.511<br>$\pm 0.018$ | 0.526<br>$\pm 0.017$        | 0.512<br>$\pm 0.017$        | 0.561<br>$\pm 0.028$ | 0.519<br>$\pm 0.018$        |
| BAcc                   |          | <b>0.202</b><br>$\pm 0.020$ | 0.202<br>$\pm 0.019$        | 0.201<br>$\pm 0.020$        | 0.191<br>$\pm 0.020$        | 0.151<br>$\pm 0.012$ | 0.145<br>$\pm 0.004$ | 0.170<br>$\pm 0.016$ | 0.153<br>$\pm 0.017$ | 0.139<br>$\pm 0.017$ | 0.141<br>$\pm 0.010$  | 0.152<br>$\pm 0.019$  | 0.142<br>$\pm 0.013$ | 0.147<br>$\pm 0.007$  | 0.146<br>$\pm 0.007$  | 0.173<br>$\pm 0.017$ | 0.149<br>$\pm 0.011$ | 0.159<br>$\pm 0.018$        | 0.152<br>$\pm 0.010$        | 0.187<br>$\pm 0.023$ | 0.147<br>$\pm 0.016$        |
| Acc_1                  |          | <b>0.202</b><br>$\pm 0.020$ | 0.203<br>$\pm 0.019$        | 0.201<br>$\pm 0.020$        | 0.191<br>$\pm 0.020$        | 0.151<br>$\pm 0.012$ | 0.145<br>$\pm 0.004$ | 0.170<br>$\pm 0.016$ | 0.154<br>$\pm 0.017$ | 0.138<br>$\pm 0.016$ | 0.141<br>$\pm 0.010$  | 0.156<br>$\pm 0.019$  | 0.141<br>$\pm 0.016$ | 0.147<br>$\pm 0.007$  | 0.147<br>$\pm 0.007$  | 0.173<br>$\pm 0.017$ | 0.149<br>$\pm 0.011$ | 0.159<br>$\pm 0.018$        | 0.151<br>$\pm 0.010$        | 0.187<br>$\pm 0.024$ | 0.147<br>$\pm 0.016$        |
| Acc_2                  |          | 0.376<br>$\pm 0.033$        | 0.385<br>$\pm 0.039$        | <b>0.381</b><br>$\pm 0.035$ | 0.369<br>$\pm 0.026$        | 0.292<br>$\pm 0.021$ | 0.282<br>$\pm 0.010$ | 0.319<br>$\pm 0.019$ | 0.306<br>$\pm 0.019$ | 0.284<br>$\pm 0.014$ | 0.283<br>$\pm 0.014$  | 0.296<br>$\pm 0.022$  | 0.285<br>$\pm 0.019$ | 0.293<br>$\pm 0.017$  | 0.288<br>$\pm 0.009$  | 0.339<br>$\pm 0.025$ | 0.291<br>$\pm 0.024$ | 0.316<br>$\pm 0.021$        | 0.288<br>$\pm 0.013$        | 0.347<br>$\pm 0.030$ | 0.293<br>$\pm 0.015$        |
| sub14                  |          | $\kappa$                    | 0.068<br>$\pm 0.019$        | 0.054<br>$\pm 0.024$        | 0.066<br>$\pm 0.023$        | 0.062<br>$\pm 0.025$ | 0.004<br>$\pm 0.013$ | 0.003<br>$\pm 0.013$ | 0.051<br>$\pm 0.021$ | 0.015<br>$\pm 0.017$ | -0.002<br>$\pm 0.010$ | -0.001<br>$\pm 0.004$ | 0.011<br>$\pm 0.023$ | 0.012<br>$\pm 0.020$  | 0.004<br>$\pm 0.007$  | 0.002<br>$\pm 0.008$ | 0.075<br>$\pm 0.034$ | 0.012<br>$\pm 0.017$        | <b>0.081</b><br>$\pm 0.036$ | 0.010<br>$\pm 0.029$ | 0.096<br>$\pm 0.027$        |
|                        | AUC      | 0.583<br>$\pm 0.019$        | 0.576<br>$\pm 0.021$        | 0.575<br>$\pm 0.017$        | 0.584<br>$\pm 0.027$        | 0.519<br>$\pm 0.014$ | 0.499<br>$\pm 0.026$ | 0.554<br>$\pm 0.017$ | 0.518<br>$\pm 0.012$ | 0.493<br>$\pm 0.031$ | 0.490<br>$\pm 0.029$  | 0.506<br>$\pm 0.016$  | 0.516<br>$\pm 0.023$ | 0.502<br>$\pm 0.011$  | 0.500<br>$\pm 0.009$  | 0.571<br>$\pm 0.025$ | 0.526<br>$\pm 0.024$ | <b>0.588</b><br>$\pm 0.035$ | 0.522<br>$\pm 0.025$        | 0.598<br>$\pm 0.026$ | 0.538<br>$\pm 0.027$        |
|                        | BAcc     | 0.201<br>$\pm 0.016$        | 0.189<br>$\pm 0.021$        | 0.200<br>$\pm 0.019$        | 0.196<br>$\pm 0.022$        | 0.146<br>$\pm 0.011$ | 0.145<br>$\pm 0.011$ | 0.186<br>$\pm 0.018$ | 0.156<br>$\pm 0.015$ | 0.141<br>$\pm 0.009$ | 0.142<br>$\pm 0.003$  | 0.152<br>$\pm 0.020$  | 0.153<br>$\pm 0.017$ | 0.146<br>$\pm 0.006$  | 0.145<br>$\pm 0.007$  | 0.207<br>$\pm 0.029$ | 0.153<br>$\pm 0.015$ | <b>0.212</b><br>$\pm 0.031$ | 0.151<br>$\pm 0.025$        | 0.226<br>$\pm 0.023$ | 0.157<br>$\pm 0.017$        |
|                        | Acc_1    | 0.201<br>$\pm 0.017$        | 0.189<br>$\pm 0.021$        | 0.199<br>$\pm 0.019$        | 0.196<br>$\pm 0.022$        | 0.146<br>$\pm 0.011$ | 0.145<br>$\pm 0.011$ | 0.186<br>$\pm 0.018$ | 0.156<br>$\pm 0.015$ | 0.141<br>$\pm 0.008$ | 0.142<br>$\pm 0.003$  | 0.152<br>$\pm 0.021$  | 0.153<br>$\pm 0.017$ | 0.146<br>$\pm 0.007$  | 0.144<br>$\pm 0.007$  | 0.207<br>$\pm 0.029$ | 0.153<br>$\pm 0.015$ | <b>0.212</b><br>$\pm 0.031$ | 0.151<br>$\pm 0.025$        | 0.225<br>$\pm 0.025$ | 0.158<br>$\pm 0.017$        |
|                        | Acc_2    | 0.373<br>$\pm 0.019$        | 0.369<br>$\pm 0.029$        | <b>0.377</b><br>$\pm 0.022$ | 0.369<br>$\pm 0.030$        | 0.294<br>$\pm 0.019$ | 0.290<br>$\pm 0.013$ | 0.348<br>$\pm 0.027$ | 0.312<br>$\pm 0.015$ | 0.279<br>$\pm 0.013$ | 0.282<br>$\pm 0.007$  | 0.298<br>$\pm 0.024$  | 0.296<br>$\pm 0.026$ | 0.288<br>$\pm 0.007$  | 0.286<br>$\pm 0.008$  | 0.376<br>$\pm 0.026$ | 0.301<br>$\pm 0.028$ | 0.373<br>$\pm 0.034$        | 0.296<br>$\pm 0.027$        | 0.407<br>$\pm 0.040$ | 0.309<br>$\pm 0.025$        |
|                        | sub15    | $\kappa$                    | 0.071<br>$\pm 0.019$        | 0.067<br>$\pm 0.026$        | 0.066<br>$\pm 0.024$        | 0.069<br>$\pm 0.033$ | 0.010<br>$\pm 0.013$ | 0.006<br>$\pm 0.016$ | 0.028<br>$\pm 0.020$ | 0.017<br>$\pm 0.022$ | 0.016<br>$\pm 0.021$  | 0.000<br>$\pm 0.005$  | 0.010<br>$\pm 0.022$ | 0.005<br>$\pm 0.019$  | -0.000<br>$\pm 0.007$ | 0.004<br>$\pm 0.011$ | 0.088<br>$\pm 0.038$ | 0.015<br>$\pm 0.015$        | 0.062<br>$\pm 0.027$        | 0.018<br>$\pm 0.014$ | <b>0.082</b><br>$\pm 0.048$ |
| Continued on next page |          |                             |                             |                             |                             |                      |                      |                      |                      |                      |                       |                       |                      |                       |                       |                      |                      |                             |                             |                      |                             |

| Subject | Metric | DeepConvnet      | EEGNet          | Conformer        | CTNet           | BIOT (f)         | BIOT (l)        | BENDR (f)       | BENDR (l)       | CBraMod (f)      | CBraMod (l)     | EEGPT (f)       | EEGPT (l)       | LaBraM (f)       | LaBraM (l)       | STEEGformer-s (f) | STEEGformer-s (l) | STEEGformer-b (f) | STEEGformer-b (l) | STEEGformer-l (f) | STEEGformer-l (l) | 1947                   |
|---------|--------|------------------|-----------------|------------------|-----------------|------------------|-----------------|-----------------|-----------------|------------------|-----------------|-----------------|-----------------|------------------|------------------|-------------------|-------------------|-------------------|-------------------|-------------------|-------------------|------------------------|
|         |        |                  |                 |                  |                 |                  |                 |                 |                 |                  |                 |                 |                 |                  |                  |                   |                   |                   |                   |                   |                   | 1948                   |
| sub1    | AUC    | 0.585<br>± 0.022 | 0.580<br>±0.014 | 0.569<br>±0.022  | 0.575<br>±0.024 | 0.518<br>±0.016  | 0.521<br>±0.023 | 0.533<br>±0.015 | 0.518<br>±0.021 | 0.523<br>±0.021  | 0.499<br>±0.019 | 0.509<br>±0.022 | 0.514<br>±0.016 | 0.505<br>±0.011  | 0.504<br>±0.018  | 0.580<br>±0.033   | 0.529<br>±0.020   | 0.555<br>±0.023   | 0.530<br>±0.018   | 0.585<br>± 0.033  | 0.541<br>±0.023   | 1947                   |
|         | BAcc   | 0.204<br>±0.017  | 0.200<br>±0.022 | 0.199<br>±0.021  | 0.202<br>±0.029 | 0.151<br>±0.011  | 0.148<br>±0.014 | 0.167<br>±0.017 | 0.157<br>±0.019 | 0.156<br>±0.018  | 0.143<br>±0.004 | 0.151<br>±0.019 | 0.147<br>±0.016 | 0.143<br>±0.006  | 0.147<br>±0.009  | 0.218<br>± 0.033  | 0.156<br>±0.013   | 0.196<br>±0.023   | 0.159<br>±0.012   | 0.213<br>± 0.041  | 0.156<br>±0.017   | 1948                   |
|         | Acc.1  | 0.204<br>±0.017  | 0.200<br>±0.022 | 0.199<br>±0.021  | 0.202<br>±0.029 | 0.151<br>±0.011  | 0.148<br>±0.014 | 0.167<br>±0.017 | 0.157<br>±0.019 | 0.156<br>±0.018  | 0.143<br>±0.004 | 0.151<br>±0.019 | 0.145<br>±0.017 | 0.143<br>±0.006  | 0.147<br>±0.009  | 0.218<br>± 0.033  | 0.156<br>±0.013   | 0.196<br>±0.023   | 0.158<br>±0.012   | 0.213<br>± 0.041  | 0.156<br>±0.017   | 1949                   |
|         | Acc.2  | 0.376<br>±0.034  | 0.367<br>±0.017 | 0.364<br>±0.028  | 0.364<br>±0.027 | 0.300<br>±0.023  | 0.295<br>±0.015 | 0.322<br>±0.021 | 0.306<br>±0.030 | 0.305<br>±0.027  | 0.286<br>±0.003 | 0.299<br>±0.027 | 0.305<br>±0.019 | 0.286<br>±0.006  | 0.287<br>±0.013  | 0.392<br>± 0.044  | 0.299<br>±0.017   | 0.344<br>±0.031   | 0.307<br>±0.012   | 0.384<br>± 0.038  | 0.307<br>±0.018   | 1950                   |
|         | κ      | 0.058<br>±0.036  | 0.062<br>±0.034 | 0.080<br>± 0.029 | 0.058<br>±0.028 | 0.024<br>±0.018  | 0.011<br>±0.018 | 0.039<br>±0.029 | 0.002<br>±0.018 | -0.002<br>±0.013 | 0.002<br>±0.007 | 0.010<br>±0.020 | 0.017<br>±0.020 | 0.001<br>±0.007  | -0.002<br>±0.008 | 0.078<br>± 0.046  | 0.025<br>±0.020   | 0.073<br>±0.049   | 0.026<br>±0.022   | 0.073<br>±0.045   | 0.025<br>±0.022   | 1951                   |
| sub2    | AUC    | 0.580<br>± 0.029 | 0.572<br>±0.026 | 0.584<br>± 0.021 | 0.577<br>±0.024 | 0.529<br>±0.025  | 0.526<br>±0.024 | 0.547<br>±0.022 | 0.506<br>±0.012 | 0.502<br>±0.011  | 0.496<br>±0.017 | 0.511<br>±0.015 | 0.519<br>±0.019 | 0.503<br>±0.013  | 0.500<br>±0.019  | 0.575<br>±0.038   | 0.528<br>±0.025   | 0.576<br>±0.035   | 0.533<br>±0.024   | 0.580<br>±0.037   | 0.540<br>±0.028   | 1952                   |
|         | BAcc   | 0.193<br>±0.031  | 0.196<br>±0.029 | 0.212<br>± 0.025 | 0.193<br>±0.024 | 0.163<br>±0.015  | 0.152<br>±0.015 | 0.176<br>±0.025 | 0.144<br>±0.016 | 0.141<br>±0.011  | 0.145<br>±0.006 | 0.151<br>±0.017 | 0.157<br>±0.017 | 0.144<br>±0.006  | 0.141<br>±0.007  | 0.210<br>± 0.039  | 0.165<br>±0.017   | 0.205<br>±0.042   | 0.165<br>±0.019   | 0.206<br>±0.038   | 0.164<br>±0.019   | 1953                   |
|         | Acc.1  | 0.193<br>±0.031  | 0.196<br>±0.029 | 0.212<br>± 0.025 | 0.193<br>±0.024 | 0.163<br>±0.015  | 0.152<br>±0.015 | 0.176<br>±0.025 | 0.144<br>±0.016 | 0.141<br>±0.011  | 0.145<br>±0.006 | 0.153<br>±0.018 | 0.160<br>±0.019 | 0.144<br>±0.006  | 0.141<br>±0.007  | 0.210<br>± 0.039  | 0.165<br>±0.017   | 0.205<br>±0.042   | 0.165<br>±0.019   | 0.206<br>±0.039   | 0.164<br>±0.019   | 1954                   |
|         | Acc.2  | 0.364<br>±0.043  | 0.354<br>±0.028 | 0.374<br>±0.030  | 0.369<br>±0.032 | 0.314<br>±0.022  | 0.295<br>±0.015 | 0.335<br>±0.028 | 0.286<br>±0.019 | 0.288<br>±0.009  | 0.285<br>±0.004 | 0.299<br>±0.021 | 0.305<br>±0.024 | 0.286<br>±0.008  | 0.292<br>±0.021  | 0.378<br>± 0.041  | 0.309<br>±0.022   | 0.368<br>±0.047   | 0.315<br>±0.024   | 0.384<br>± 0.053  | 0.312<br>±0.025   | 1955                   |
|         | κ      | 0.053<br>±0.039  | 0.070<br>±0.034 | 0.059<br>±0.037  | 0.055<br>±0.022 | 0.012<br>±0.021  | 0.002<br>±0.014 | 0.034<br>±0.027 | 0.011<br>±0.026 | 0.017<br>±0.017  | 0.000<br>±0.002 | 0.002<br>±0.026 | 0.008<br>±0.023 | -0.000<br>±0.004 | 0.004<br>±0.017  | 0.087<br>± 0.135  | 0.021<br>±0.026   | 0.099<br>± 0.129  | 0.016<br>±0.023   | 0.063<br>±0.118   | 0.014<br>±0.023   | 1956                   |
| sub3    | AUC    | 0.559<br>±0.040  | 0.566<br>±0.031 | 0.548<br>±0.028  | 0.555<br>±0.026 | 0.526<br>±0.022  | 0.513<br>±0.010 | 0.527<br>±0.021 | 0.509<br>±0.016 | 0.511<br>±0.014  | 0.498<br>±0.015 | 0.512<br>±0.027 | 0.534<br>±0.039 | 0.501<br>±0.007  | 0.504<br>±0.015  | 0.567<br>± 0.093  | 0.533<br>±0.046   | 0.570<br>± 0.090  | 0.547<br>±0.053   | 0.562<br>±0.086   | 0.548<br>±0.041   | 1957                   |
|         | BAcc   | 0.188<br>±0.033  | 0.203<br>±0.029 | 0.193<br>±0.032  | 0.190<br>±0.019 | 0.153<br>±0.018  | 0.144<br>±0.012 | 0.172<br>±0.023 | 0.152<br>±0.022 | 0.157<br>±0.015  | 0.143<br>±0.002 | 0.145<br>±0.022 | 0.149<br>±0.020 | 0.143<br>±0.004  | 0.146<br>±0.014  | 0.217<br>± 0.116  | 0.161<br>±0.022   | 0.228<br>± 0.110  | 0.157<br>±0.020   | 0.197<br>±0.102   | 0.155<br>±0.020   | 1958                   |
|         | Acc.1  | 0.188<br>±0.033  | 0.203<br>±0.029 | 0.193<br>±0.032  | 0.190<br>±0.019 | 0.153<br>±0.018  | 0.144<br>±0.012 | 0.172<br>±0.023 | 0.152<br>±0.022 | 0.157<br>±0.015  | 0.143<br>±0.001 | 0.146<br>±0.023 | 0.150<br>±0.019 | 0.142<br>±0.003  | 0.145<br>±0.014  | 0.217<br>± 0.116  | 0.161<br>±0.022   | 0.228<br>± 0.110  | 0.157<br>±0.020   | 0.199<br>±0.102   | 0.155<br>±0.019   | 1959                   |
|         | Acc.2  | 0.341<br>±0.044  | 0.356<br>±0.039 | 0.339<br>±0.035  | 0.335<br>±0.031 | 0.299<br>±0.026  | 0.295<br>±0.013 | 0.314<br>±0.022 | 0.302<br>±0.021 | 0.299<br>±0.016  | 0.284<br>±0.005 | 0.288<br>±0.019 | 0.307<br>±0.030 | 0.286<br>±0.006  | 0.287<br>±0.011  | 0.372<br>± 0.132  | 0.308<br>±0.018   | 0.369<br>± 0.115  | 0.307<br>±0.017   | 0.355<br>±0.125   | 0.307<br>±0.029   | 1960                   |
|         | κ      | 0.059<br>±0.031  | 0.067<br>±0.033 | 0.065<br>±0.030  | 0.067<br>±0.026 | -0.004<br>±0.017 | 0.012<br>±0.014 | 0.048<br>±0.020 | 0.022<br>±0.021 | 0.010<br>±0.020  | 0.001<br>±0.002 | 0.015<br>±0.019 | 0.014<br>±0.022 | -0.001<br>±0.005 | 0.004<br>±0.009  | 0.065<br>±0.059   | 0.023<br>±0.022   | 0.069<br>± 0.105  | 0.033<br>±0.036   | 0.103<br>± 0.120  | 0.032<br>±0.041   | 1961                   |
| sub4    | AUC    | 0.562<br>±0.022  | 0.578<br>±0.024 | 0.561<br>±0.023  | 0.570<br>±0.020 | 0.495<br>±0.011  | 0.517<br>±0.020 | 0.541<br>±0.018 | 0.519<br>±0.018 | 0.510<br>±0.024  | 0.502<br>±0.012 | 0.512<br>±0.015 | 0.528<br>±0.035 | 0.502<br>±0.010  | 0.509<br>±0.020  | 0.577<br>±0.057   | 0.543<br>±0.046   | 0.584<br>± 0.076  | 0.553<br>±0.055   | 0.579<br>± 0.089  | 0.552<br>±0.053   | 1962                   |
|         |        |                  |                 |                  |                 |                  |                 |                 |                 |                  |                 |                 |                 |                  |                  |                   |                   |                   |                   |                   |                   | Continued on next page |

| SubjectMetric |          | DeepConvnet                    | EEGNet                         | Conformer                      | CTNet                          | BIOT (f)        | BIOT (l)         | BENDR (f)       | BENDR (l)       | CBraMod (f)      | CBraMod (l)      | EEGPT (f)       | EEGPT (l)       | LaBraM (f)      | LaBraM (l)      | STEEGformer-s (f)              | STEEGformer-s (l) | STEEGformer-b (f)              | STEEGformer-b (l) | STEEGformer-l (f)              | STEEGformer-l (l) |
|---------------|----------|--------------------------------|--------------------------------|--------------------------------|--------------------------------|-----------------|------------------|-----------------|-----------------|------------------|------------------|-----------------|-----------------|-----------------|-----------------|--------------------------------|-------------------|--------------------------------|-------------------|--------------------------------|-------------------|
| sub5          | BAcc     | 0.194<br>±0.026                | 0.201<br>±0.029                | 0.198<br>±0.026                | 0.201<br>±0.023                | 0.139<br>±0.014 | 0.153<br>±0.012  | 0.184<br>±0.017 | 0.162<br>±0.018 | 0.152<br>±0.017  | 0.144<br>±0.001  | 0.156<br>±0.016 | 0.155<br>±0.019 | 0.142<br>±0.004 | 0.146<br>±0.007 | 0.199<br>±0.051                | 0.162<br>±0.019   | <b>0.202</b><br>± <b>0.090</b> | 0.171<br>±0.031   | <div>0.231<br/>± 0.103</div>   | 0.170<br>±0.035   |
|               | Acc_1    | 0.194<br>±0.026                | 0.201<br>±0.028                | 0.198<br>±0.026                | 0.201<br>±0.023                | 0.139<br>±0.014 | 0.153<br>±0.012  | 0.184<br>±0.016 | 0.162<br>±0.018 | 0.152<br>±0.017  | 0.144<br>±0.002  | 0.157<br>±0.016 | 0.156<br>±0.019 | 0.141<br>±0.005 | 0.146<br>±0.008 | 0.199<br>±0.051                | 0.162<br>±0.019   | <b>0.202</b><br>± <b>0.090</b> | 0.171<br>±0.031   | <div>0.232<br/>± 0.103</div>   | 0.171<br>±0.035   |
|               | Acc_2    | 0.337<br>±0.019                | <div>0.372<br/>± 0.032</div>   | 0.356<br>±0.028                | 0.355<br>±0.028                | 0.284<br>±0.014 | 0.298<br>±0.012  | 0.331<br>±0.025 | 0.308<br>±0.018 | 0.290<br>±0.020  | 0.285<br>±0.002  | 0.292<br>±0.018 | 0.305<br>±0.019 | 0.285<br>±0.004 | 0.288<br>±0.008 | 0.328<br>±0.077                | 0.306<br>±0.027   | 0.332<br>±0.106                | 0.312<br>±0.030   | <b>0.367</b><br>± <b>0.103</b> | 0.321<br>±0.031   |
|               | $\kappa$ | 0.075<br>±0.029                | 0.075<br>±0.022                | 0.087<br>±0.029                | <b>0.088</b><br>± <b>0.031</b> | 0.002<br>±0.015 | -0.001<br>±0.012 | 0.058<br>±0.033 | 0.016<br>±0.022 | -0.008<br>±0.011 | -0.005<br>±0.013 | 0.008<br>±0.025 | 0.012<br>±0.014 | 0.010<br>±0.011 | 0.004<br>±0.009 | 0.082<br>±0.032                | 0.019<br>±0.018   | 0.080<br>±0.036                | 0.026<br>±0.024   | <div>0.103<br/>± 0.043</div>   | 0.024<br>±0.018   |
|               | AUC      | <b>0.598</b><br>± <b>0.028</b> | 0.595<br>±0.020                | 0.588<br>±0.025                | 0.594<br>±0.028                | 0.508<br>±0.015 | 0.511<br>±0.018  | 0.555<br>±0.027 | 0.514<br>±0.014 | 0.502<br>±0.015  | 0.500<br>±0.025  | 0.515<br>±0.020 | 0.520<br>±0.013 | 0.510<br>±0.018 | 0.506<br>±0.023 | 0.580<br>±0.024                | 0.540<br>±0.025   | 0.582<br>±0.035                | 0.544<br>±0.023   | <div>0.600<br/>± 0.033</div>   | 0.551<br>±0.025   |
|               | BAcc     | 0.207<br>±0.025                | 0.207<br>±0.019                | 0.217<br>±0.025                | <b>0.218</b><br>± <b>0.027</b> | 0.145<br>±0.013 | 0.142<br>±0.011  | 0.193<br>±0.028 | 0.156<br>±0.019 | 0.136<br>±0.010  | 0.139<br>±0.011  | 0.150<br>±0.022 | 0.153<br>±0.012 | 0.151<br>±0.009 | 0.147<br>±0.008 | 0.213<br>±0.028                | 0.159<br>±0.015   | 0.211<br>±0.031                | 0.165<br>±0.021   | <div>0.231<br/>± 0.036</div>   | 0.163<br>±0.015   |
|               | Acc_1    | 0.207<br>±0.025                | 0.208<br>±0.019                | 0.217<br>±0.025                | <b>0.218</b><br>± <b>0.027</b> | 0.145<br>±0.013 | 0.142<br>±0.011  | 0.192<br>±0.028 | 0.156<br>±0.019 | 0.136<br>±0.010  | 0.139<br>±0.011  | 0.149<br>±0.022 | 0.155<br>±0.012 | 0.151<br>±0.009 | 0.147<br>±0.008 | 0.213<br>±0.028                | 0.159<br>±0.015   | 0.211<br>±0.031                | 0.165<br>±0.021   | <div>0.231<br/>± 0.037</div>   | 0.163<br>±0.015   |
|               | Acc_2    | 0.386<br>±0.032                | 0.384<br>±0.026                | 0.393<br>±0.036                | 0.384<br>±0.038                | 0.294<br>±0.011 | 0.287<br>±0.011  | 0.340<br>±0.031 | 0.293<br>±0.020 | 0.282<br>±0.014  | 0.280<br>±0.010  | 0.303<br>±0.029 | 0.303<br>±0.017 | 0.291<br>±0.013 | 0.290<br>±0.013 | <b>0.397</b><br>± <b>0.037</b> | 0.311<br>±0.020   | 0.378<br>±0.037                | 0.315<br>±0.025   | <div>0.404<br/>± 0.045</div>   | 0.317<br>±0.021   |
| sub6          | $\kappa$ | 0.050<br>±0.030                | 0.062<br>±0.030                | 0.065<br>±0.033                | 0.064<br>±0.020                | 0.014<br>±0.017 | -0.001<br>±0.015 | 0.049<br>±0.025 | 0.030<br>±0.023 | 0.021<br>±0.022  | -0.011<br>±0.016 | 0.012<br>±0.022 | 0.008<br>±0.021 | 0.000<br>±0.000 | 0.003<br>±0.012 | <div>0.074<br/>± 0.049</div>   | 0.026<br>±0.014   | 0.057<br>±0.037                | 0.015<br>±0.022   | <b>0.072</b><br>± <b>0.043</b> | 0.016<br>±0.020   |
|               | AUC      | 0.561<br>±0.033                | <b>0.567</b><br>± <b>0.029</b> | 0.559<br>±0.024                | <div>0.567<br/>± 0.031</div>   | 0.532<br>±0.020 | 0.522<br>±0.023  | 0.548<br>±0.029 | 0.526<br>±0.011 | 0.525<br>±0.024  | 0.486<br>±0.036  | 0.511<br>±0.010 | 0.512<br>±0.013 | 0.498<br>±0.006 | 0.507<br>±0.014 | 0.561<br>±0.035                | 0.536<br>±0.036   | 0.564<br>±0.030                | 0.538<br>±0.038   | 0.566<br>±0.033                | 0.536<br>±0.032   |
|               | BAcc     | 0.186<br>±0.025                | 0.196<br>±0.026                | 0.199<br>±0.029                | 0.198<br>±0.017                | 0.155<br>±0.014 | 0.142<br>±0.013  | 0.185<br>±0.022 | 0.168<br>±0.020 | 0.161<br>±0.019  | 0.134<br>±0.014  | 0.153<br>±0.019 | 0.149<br>±0.018 | 0.143<br>±0.000 | 0.145<br>±0.010 | <div>0.206<br/>± 0.042</div>   | 0.165<br>±0.012   | 0.192<br>±0.031                | 0.156<br>±0.019   | <b>0.204</b><br>± <b>0.037</b> | 0.157<br>±0.017   |
|               | Acc_1    | 0.186<br>±0.025                | 0.196<br>±0.026                | 0.198<br>±0.028                | 0.198<br>±0.017                | 0.155<br>±0.014 | 0.142<br>±0.013  | 0.185<br>±0.022 | 0.168<br>±0.020 | 0.161<br>±0.019  | 0.134<br>±0.014  | 0.153<br>±0.020 | 0.150<br>±0.020 | 0.143<br>±0.000 | 0.146<br>±0.010 | <div>0.206<br/>± 0.042</div>   | 0.165<br>±0.012   | 0.192<br>±0.032                | 0.156<br>±0.019   | <b>0.202</b><br>± <b>0.036</b> | 0.157<br>±0.017   |
|               | Acc_2    | 0.347<br>±0.034                | 0.354<br>±0.036                | <b>0.365</b><br>± <b>0.033</b> | 0.358<br>±0.032                | 0.306<br>±0.020 | 0.290<br>±0.019  | 0.337<br>±0.034 | 0.316<br>±0.016 | 0.311<br>±0.023  | 0.277<br>±0.019  | 0.294<br>±0.022 | 0.293<br>±0.018 | 0.286<br>±0.004 | 0.287<br>±0.011 | <div>0.369<br/>± 0.048</div>   | 0.310<br>±0.022   | 0.351<br>±0.038                | 0.316<br>±0.032   | 0.356<br>±0.042                | 0.308<br>±0.025   |
|               | $\kappa$ | <b>0.090</b><br>± <b>0.038</b> | 0.075<br>±0.037                | 0.088<br>±0.039                | 0.076<br>±0.037                | 0.005<br>±0.015 | 0.005<br>±0.015  | 0.033<br>±0.023 | 0.011<br>±0.024 | 0.004<br>±0.021  | 0.001<br>±0.006  | 0.007<br>±0.015 | 0.019<br>±0.011 | 0.003<br>±0.007 | 0.005<br>±0.010 | <div>0.090<br/>± 0.041</div>   | 0.012<br>±0.023   | 0.087<br>±0.040                | 0.009<br>±0.017   | 0.084<br>±0.043                | 0.008<br>±0.019   |
| sub7          | AUC      | <div>0.606<br/>± 0.038</div>   | <b>0.596</b><br>± <b>0.039</b> | 0.593<br>±0.035                | 0.594<br>±0.034                | 0.505<br>±0.016 | 0.519<br>±0.023  | 0.538<br>±0.013 | 0.513<br>±0.014 | 0.510<br>±0.021  | 0.505<br>±0.016  | 0.517<br>±0.011 | 0.524<br>±0.015 | 0.500<br>±0.019 | 0.504<br>±0.016 | 0.586<br>±0.034                | 0.528<br>±0.019   | 0.590<br>±0.031                | 0.530<br>±0.022   | 0.595<br>±0.037                | 0.539<br>±0.021   |
|               | BAcc     | <b>0.220</b><br>± <b>0.033</b> | 0.207<br>±0.032                | 0.218<br>±0.034                | 0.208<br>±0.032                | 0.147<br>±0.013 | 0.147<br>±0.013  | 0.171<br>±0.020 | 0.152<br>±0.021 | 0.146<br>±0.018  | 0.143<br>±0.005  | 0.148<br>±0.013 | 0.160<br>±0.009 | 0.145<br>±0.006 | 0.147<br>±0.008 | <div>0.220<br/>± 0.035</div>   | 0.153<br>±0.020   | 0.218<br>±0.034                | 0.150<br>±0.014   | 0.215<br>±0.037                | 0.149<br>±0.016   |

Continued on next page

|         |        |               |               |               |               |               |               |               |               |                |                |                |               |                |                |                  |                  |                  |                  | 2013             | 2014             | 2015          | 2016 | 2017 | 2018 | 2019 | 2020 | 2021 | 2022 | 2023 | 2024 | 2025 | 2026 | 2027 | 2028 | 2029 | 2030 | 2031 | 2032 | 2033 | 2034 | 2035 | 2036 | 2037 | 2038 | 2039 | 2040 | 2041 | 2042 | 2043 | 2044 | 2045 |
|---------|--------|---------------|---------------|---------------|---------------|---------------|---------------|---------------|---------------|----------------|----------------|----------------|---------------|----------------|----------------|------------------|------------------|------------------|------------------|------------------|------------------|---------------|------|------|------|------|------|------|------|------|------|------|------|------|------|------|------|------|------|------|------|------|------|------|------|------|------|------|------|------|------|------|
| Subject | Metric | DeepConvnet   | EEGNet        | Conformer     | CTNet         | BIOT (f)      | BIOT (l)      | BENDR (f)     | BENDR (l)     | CBraMod (f)    | CBraMod (l)    | EEGPT (f)      | EEGPT (l)     | LaBraM (f)     | LaBraM (l)     | STEGformer-s (f) | STEGformer-s (l) | STEGformer-b (f) | STEGformer-b (l) | STEGformer-l (f) | STEGformer-l (l) |               |      |      |      |      |      |      |      |      |      |      |      |      |      |      |      |      |      |      |      |      |      |      |      |      |      |      |      |      |      |      |
|         |        | 0.220 ± 0.033 | 0.207 ± 0.032 | 0.218 ± 0.034 | 0.208 ± 0.031 | 0.147 ± 0.013 | 0.147 ± 0.013 | 0.171 ± 0.020 | 0.152 ± 0.021 | 0.146 ± 0.018  | 0.144 ± 0.005  | 0.150 ± 0.013  | 0.161 ± 0.009 | 0.144 ± 0.007  | 0.147 ± 0.009  | 0.220 ± 0.035    | 0.153 ± 0.021    | 0.218 ± 0.034    | 0.150 ± 0.014    | 0.214 ± 0.037    | 0.149 ± 0.016    |               |      |      |      |      |      |      |      |      |      |      |      |      |      |      |      |      |      |      |      |      |      |      |      |      |      |      |      |      |      |      |
|         | Acc.1  | 0.401 ± 0.048 | 0.389 ± 0.046 | 0.401 ± 0.047 | 0.379 ± 0.042 | 0.296 ± 0.022 | 0.290 ± 0.017 | 0.328 ± 0.026 | 0.298 ± 0.022 | 0.291 ± 0.024  | 0.288 ± 0.010  | 0.299 ± 0.012  | 0.312 ± 0.015 | 0.284 ± 0.011  | 0.288 ± 0.010  | 0.402 ± 0.042    | 0.304 ± 0.020    | 0.381 ± 0.038    | 0.301 ± 0.017    | 0.394 ± 0.045    | 0.305 ± 0.020    |               |      |      |      |      |      |      |      |      |      |      |      |      |      |      |      |      |      |      |      |      |      |      |      |      |      |      |      |      |      |      |
| sub8    | κ      | 0.043 ± 0.033 | 0.050 ± 0.034 | 0.051 ± 0.037 | 0.050 ± 0.033 | 0.002 ± 0.012 | 0.002 ± 0.017 | 0.031 ± 0.018 | 0.007 ± 0.018 | -0.002 ± 0.014 | -0.007 ± 0.024 | -0.000 ± 0.022 | 0.007 ± 0.029 | -0.001 ± 0.010 | 0.003 ± 0.015  | 0.024 ± 0.021    | -0.000 ± 0.021   | 0.033 ± 0.019    | 0.010 ± 0.029    | 0.048 ± 0.036    | 0.006 ± 0.024    |               |      |      |      |      |      |      |      |      |      |      |      |      |      |      |      |      |      |      |      |      |      |      |      |      |      |      |      |      |      |      |
|         | AUC    | 0.555 ± 0.024 | 0.566 ± 0.028 | 0.560 ± 0.023 | 0.554 ± 0.021 | 0.498 ± 0.015 | 0.491 ± 0.019 | 0.534 ± 0.021 | 0.510 ± 0.013 | 0.491 ± 0.021  | 0.492 ± 0.037  | 0.504 ± 0.019  | 0.511 ± 0.016 | 0.508 ± 0.017  | 0.497 ± 0.028  | 0.532 ± 0.023    | 0.499 ± 0.024    | 0.528 ± 0.024    | 0.499 ± 0.023    | 0.556 ± 0.031    | 0.496 ± 0.025    |               |      |      |      |      |      |      |      |      |      |      |      |      |      |      |      |      |      |      |      |      |      |      |      |      |      |      |      |      |      |      |
|         | BAcc   | 0.179 ± 0.028 | 0.185 ± 0.029 | 0.187 ± 0.032 | 0.185 ± 0.028 | 0.145 ± 0.010 | 0.145 ± 0.014 | 0.170 ± 0.015 | 0.149 ± 0.016 | 0.141 ± 0.012  | 0.137 ± 0.021  | 0.143 ± 0.019  | 0.149 ± 0.025 | 0.142 ± 0.008  | 0.145 ± 0.013  | 0.164 ± 0.018    | 0.143 ± 0.018    | 0.171 ± 0.016    | 0.152 ± 0.025    | 0.184 ± 0.031    | 0.148 ± 0.020    |               |      |      |      |      |      |      |      |      |      |      |      |      |      |      |      |      |      |      |      |      |      |      |      |      |      |      |      |      |      |      |
|         | Acc.1  | 0.179 ± 0.028 | 0.185 ± 0.029 | 0.187 ± 0.032 | 0.185 ± 0.028 | 0.145 ± 0.010 | 0.145 ± 0.014 | 0.170 ± 0.015 | 0.149 ± 0.016 | 0.141 ± 0.011  | 0.136 ± 0.021  | 0.143 ± 0.022  | 0.147 ± 0.025 | 0.142 ± 0.008  | 0.145 ± 0.013  | 0.164 ± 0.018    | 0.143 ± 0.018    | 0.171 ± 0.016    | 0.152 ± 0.025    | 0.184 ± 0.033    | 0.148 ± 0.020    |               |      |      |      |      |      |      |      |      |      |      |      |      |      |      |      |      |      |      |      |      |      |      |      |      |      |      |      |      |      |      |
|         | Acc.2  | 0.344 ± 0.029 | 0.362 ± 0.032 | 0.355 ± 0.030 | 0.336 ± 0.026 | 0.287 ± 0.011 | 0.291 ± 0.015 | 0.317 ± 0.026 | 0.292 ± 0.014 | 0.285 ± 0.016  | 0.280 ± 0.022  | 0.291 ± 0.024  | 0.299 ± 0.025 | 0.284 ± 0.010  | 0.287 ± 0.016  | 0.322 ± 0.038    | 0.289 ± 0.022    | 0.312 ± 0.024    | 0.292 ± 0.026    | 0.351 ± 0.043    | 0.285 ± 0.028    |               |      |      |      |      |      |      |      |      |      |      |      |      |      |      |      |      |      |      |      |      |      |      |      |      |      |      |      |      |      |      |
|         | sub9   | κ             | 0.024 ± 0.031 | 0.018 ± 0.023 | 0.017 ± 0.025 | 0.025 ± 0.019 | 0.006 ± 0.018 | 0.011 ± 0.016 | 0.000 ± 0.020 | 0.010 ± 0.020  | 0.001 ± 0.015  | -0.003 ± 0.011 | 0.014 ± 0.018 | 0.015 ± 0.026  | -0.001 ± 0.009 | -0.004 ± 0.015   | 0.054 ± 0.040    | 0.013 ± 0.024    | 0.042 ± 0.035    | 0.011 ± 0.021    | 0.026 ± 0.021    | 0.012 ± 0.023 |      |      |      |      |      |      |      |      |      |      |      |      |      |      |      |      |      |      |      |      |      |      |      |      |      |      |      |      |      |      |
| AUC     |        | 0.523 ± 0.021 | 0.524 ± 0.023 | 0.514 ± 0.017 | 0.532 ± 0.018 | 0.506 ± 0.015 | 0.511 ± 0.021 | 0.504 ± 0.020 | 0.508 ± 0.020 | 0.501 ± 0.015  | 0.495 ± 0.038  | 0.516 ± 0.018  | 0.513 ± 0.018 | 0.496 ± 0.016  | 0.492 ± 0.024  | 0.551 ± 0.032    | 0.516 ± 0.024    | 0.555 ± 0.036    | 0.522 ± 0.024    | 0.525 ± 0.020    | 0.513 ± 0.026    |               |      |      |      |      |      |      |      |      |      |      |      |      |      |      |      |      |      |      |      |      |      |      |      |      |      |      |      |      |      |      |
| BAcc    |        | 0.163 ± 0.026 | 0.158 ± 0.020 | 0.157 ± 0.021 | 0.164 ± 0.016 | 0.148 ± 0.016 | 0.152 ± 0.014 | 0.143 ± 0.017 | 0.152 ± 0.017 | 0.143 ± 0.013  | 0.141 ± 0.009  | 0.155 ± 0.016  | 0.156 ± 0.022 | 0.142 ± 0.008  | 0.139 ± 0.013  | 0.189 ± 0.035    | 0.154 ± 0.020    | 0.179 ± 0.030    | 0.152 ± 0.018    | 0.165 ± 0.018    | 0.153 ± 0.019    |               |      |      |      |      |      |      |      |      |      |      |      |      |      |      |      |      |      |      |      |      |      |      |      |      |      |      |      |      |      |      |
| Acc.1   |        | 0.163 ± 0.026 | 0.158 ± 0.020 | 0.157 ± 0.021 | 0.164 ± 0.016 | 0.148 ± 0.016 | 0.152 ± 0.014 | 0.143 ± 0.017 | 0.152 ± 0.018 | 0.143 ± 0.013  | 0.141 ± 0.009  | 0.155 ± 0.015  | 0.156 ± 0.022 | 0.142 ± 0.008  | 0.139 ± 0.014  | 0.189 ± 0.035    | 0.154 ± 0.020    | 0.179 ± 0.030    | 0.152 ± 0.018    | 0.165 ± 0.016    | 0.153 ± 0.019    |               |      |      |      |      |      |      |      |      |      |      |      |      |      |      |      |      |      |      |      |      |      |      |      |      |      |      |      |      |      |      |
| Acc.2   |        | 0.311 ± 0.027 | 0.313 ± 0.027 | 0.299 ± 0.025 | 0.315 ± 0.025 | 0.291 ± 0.023 | 0.293 ± 0.016 | 0.287 ± 0.025 | 0.293 ± 0.027 | 0.286 ± 0.018  | 0.283 ± 0.017  | 0.307 ± 0.024  | 0.307 ± 0.022 | 0.282 ± 0.012  | 0.280 ± 0.017  | 0.326 ± 0.034    | 0.302 ± 0.025    | 0.329 ± 0.033    | 0.304 ± 0.023    | 0.301 ± 0.030    | 0.300 ± 0.021    |               |      |      |      |      |      |      |      |      |      |      |      |      |      |      |      |      |      |      |      |      |      |      |      |      |      |      |      |      |      |      |

## C.3 LEAVE-ONE-OUT RESULTS

## C.3.1 LEAVE-ONE-OUT ZERO-SHOT EVALUATION

Table 21: Average Leave-One-Out Zero-Shot Performance Across All Subjects.

| Model (Training strategy) | $\kappa$     | AUC          | BAcc         | Acc.1        | Acc.2        |
|---------------------------|--------------|--------------|--------------|--------------|--------------|
|                           | 0.187        | <b>0.715</b> | 0.303        | 0.304        | 0.502        |
| <b>DeepConvnet</b>        | $\pm 0.034$  | $\pm 0.026$  | $\pm 0.029$  | $\pm 0.029$  | $\pm 0.038$  |
|                           | 0.164        | 0.700        | 0.283        | 0.283        | 0.486        |
| <b>EEGNet</b>             | $\pm 0.046$  | $\pm 0.037$  | $\pm 0.040$  | $\pm 0.039$  | $\pm 0.053$  |
|                           | 0.163        | 0.679        | 0.283        | 0.283        | 0.486        |
| <b>Conformer</b>          | $\pm 0.050$  | $\pm 0.039$  | $\pm 0.042$  | $\pm 0.042$  | $\pm 0.048$  |
|                           | 0.197        | 0.721        | 0.311        | 0.312        | 0.514        |
| <b>CTNet</b>              | $\pm 0.048$  | $\pm 0.033$  | $\pm 0.041$  | $\pm 0.041$  | $\pm 0.050$  |
|                           | 0.039        | 0.537        | 0.176        | 0.177        | 0.323        |
| <b>BIOT (f)</b>           | $\pm 0.021$  | $\pm 0.021$  | $\pm 0.018$  | $\pm 0.018$  | $\pm 0.023$  |
|                           | 0.019        | 0.535        | 0.159        | 0.159        | 0.299        |
| <b>BIOT (l)</b>           | $\pm 0.019$  | $\pm 0.037$  | $\pm 0.016$  | $\pm 0.016$  | $\pm 0.014$  |
|                           | 0.129        | 0.626        | 0.253        | 0.253        | 0.425        |
| <b>BENDR (f)</b>          | $\pm 0.034$  | $\pm 0.024$  | $\pm 0.029$  | $\pm 0.029$  | $\pm 0.033$  |
|                           | 0.037        | 0.537        | 0.174        | 0.174        | 0.334        |
| <b>BENDR (l)</b>          | $\pm 0.019$  | $\pm 0.014$  | $\pm 0.016$  | $\pm 0.016$  | $\pm 0.015$  |
|                           | 0.043        | 0.542        | 0.180        | 0.179        | 0.332        |
| <b>CBraMod (f)</b>        | $\pm 0.023$  | $\pm 0.020$  | $\pm 0.019$  | $\pm 0.019$  | $\pm 0.027$  |
|                           | -0.001       | 0.500        | 0.142        | 0.143        | 0.281        |
| <b>CBraMod (l)</b>        | $\pm 0.007$  | $\pm 0.034$  | $\pm 0.006$  | $\pm 0.005$  | $\pm 0.009$  |
|                           | 0.039        | 0.550        | 0.177        | 0.175        | 0.343        |
| <b>EEGPT (f)</b>          | $\pm 0.025$  | $\pm 0.016$  | $\pm 0.021$  | $\pm 0.022$  | $\pm 0.024$  |
|                           | 0.071        | 0.591        | 0.204        | 0.202        | 0.370        |
| <b>EEGPT (l)</b>          | $\pm 0.037$  | $\pm 0.025$  | $\pm 0.032$  | $\pm 0.033$  | $\pm 0.035$  |
|                           | 0.006        | 0.512        | 0.148        | 0.147        | 0.293        |
| <b>LaBraM (f)</b>         | $\pm 0.007$  | $\pm 0.021$  | $\pm 0.006$  | $\pm 0.006$  | $\pm 0.011$  |
|                           | 0.010        | 0.510        | 0.151        | 0.152        | 0.297        |
| <b>LaBraM (l)</b>         | $\pm 0.015$  | $\pm 0.012$  | $\pm 0.013$  | $\pm 0.012$  | $\pm 0.015$  |
|                           | 0.240        | 0.701        | 0.348        | 0.348        | 0.546        |
| <b>STEEGformer-s (f)</b>  | $\pm 0.111$  | $\pm 0.067$  | $\pm 0.095$  | $\pm 0.095$  | $\pm 0.093$  |
|                           | 0.053        | 0.583        | 0.189        | 0.189        | 0.337        |
| <b>STEEGformer-s (l)</b>  | $\pm 0.043$  | $\pm 0.045$  | $\pm 0.037$  | $\pm 0.037$  | $\pm 0.039$  |
|                           | <b>0.246</b> | 0.705        | <b>0.354</b> | <b>0.354</b> | <b>0.549</b> |
| <b>STEEGformer-b (f)</b>  | $\pm 0.119$  | $\pm 0.070$  | $\pm 0.102$  | $\pm 0.103$  | $\pm 0.091$  |
|                           | 0.051        | 0.593        | 0.187        | 0.187        | 0.342        |
| <b>STEEGformer-b (l)</b>  | $\pm 0.047$  | $\pm 0.061$  | $\pm 0.040$  | $\pm 0.040$  | $\pm 0.041$  |
|                           | 0.277        | 0.712        | 0.380        | 0.382        | 0.568        |
| <b>STEEGformer-l (f)</b>  | $\pm 0.123$  | $\pm 0.073$  | $\pm 0.105$  | $\pm 0.107$  | $\pm 0.102$  |
|                           | 0.061        | 0.600        | 0.195        | 0.195        | 0.359        |
| <b>STEEGformer-l (l)</b>  | $\pm 0.062$  | $\pm 0.061$  | $\pm 0.053$  | $\pm 0.055$  | $\pm 0.059$  |

Table 22: Per-Subject Leave-One-Out Zero-Shot Performance.

| Subject | Metric           | DeepConvnet                 | EEGNet                      | Conformer            | CTNet                       | BIOT (f)             | BIOT (l)             | BENDR (f)            | BENDR (l)            | CBraMod (f)          | CBraMod (l)           | EEGPT (f)            | EEGPT (l)            | LaBraM (f)           | LaBraM (l)           | STEEGformer-s (f)           | STEEGformer-s (l)     | STEEGformer-b (f)    | STEEGformer-b (l)    | STEEGformer-l (f)           | STEEGformer-l (l)    |
|---------|------------------|-----------------------------|-----------------------------|----------------------|-----------------------------|----------------------|----------------------|----------------------|----------------------|----------------------|-----------------------|----------------------|----------------------|----------------------|----------------------|-----------------------------|-----------------------|----------------------|----------------------|-----------------------------|----------------------|
| sub1    | $\kappa$         | 0.172<br>$\pm 0.052$        | <b>0.181</b><br>$\pm 0.034$ | 0.136<br>$\pm 0.041$ | 0.164<br>$\pm 0.032$        | 0.017<br>$\pm 0.039$ | 0.006<br>$\pm 0.008$ | 0.122<br>$\pm 0.074$ | 0.044<br>$\pm 0.049$ | 0.069<br>$\pm 0.040$ | -0.006<br>$\pm 0.012$ | 0.031<br>$\pm 0.018$ | 0.097<br>$\pm 0.057$ | 0.000<br>$\pm 0.000$ | 0.000<br>$\pm 0.020$ | 0.153<br>$\pm 0.050$        | 0.081<br>$\pm 0.042$  | 0.158<br>$\pm 0.047$ | 0.050<br>$\pm 0.029$ | 0.186<br>$\pm 0.040$        | 0.050<br>$\pm 0.030$ |
|         | AUC              | <b>0.701</b><br>$\pm 0.023$ | 0.695<br>$\pm 0.013$        | 0.654<br>$\pm 0.036$ | 0.706<br>$\pm 0.020$        | 0.500<br>$\pm 0.025$ | 0.602<br>$\pm 0.049$ | 0.634<br>$\pm 0.045$ | 0.522<br>$\pm 0.053$ | 0.546<br>$\pm 0.030$ | 0.502<br>$\pm 0.007$  | 0.546<br>$\pm 0.036$ | 0.609<br>$\pm 0.012$ | 0.498<br>$\pm 0.009$ | 0.507<br>$\pm 0.026$ | 0.649<br>$\pm 0.029$        | 0.586<br>$\pm 0.036$  | 0.658<br>$\pm 0.031$ | 0.560<br>$\pm 0.039$ | 0.671<br>$\pm 0.025$        | 0.580<br>$\pm 0.037$ |
|         | BAcc             | 0.290<br>$\pm 0.044$        | <b>0.298</b><br>$\pm 0.029$ | 0.260<br>$\pm 0.035$ | 0.283<br>$\pm 0.027$        | 0.157<br>$\pm 0.033$ | 0.148<br>$\pm 0.007$ | 0.248<br>$\pm 0.064$ | 0.181<br>$\pm 0.042$ | 0.202<br>$\pm 0.035$ | 0.138<br>$\pm 0.011$  | 0.169<br>$\pm 0.016$ | 0.226<br>$\pm 0.049$ | 0.143<br>$\pm 0.000$ | 0.143<br>$\pm 0.017$ | 0.274<br>$\pm 0.043$        | 0.212<br>$\pm 0.036$  | 0.279<br>$\pm 0.040$ | 0.186<br>$\pm 0.025$ | 0.302<br>$\pm 0.034$        | 0.186<br>$\pm 0.026$ |
|         | Acc <sub>1</sub> | 0.290<br>$\pm 0.044$        | 0.298<br>$\pm 0.029$        | 0.260<br>$\pm 0.035$ | 0.283<br>$\pm 0.027$        | 0.157<br>$\pm 0.033$ | 0.148<br>$\pm 0.007$ | 0.248<br>$\pm 0.064$ | 0.181<br>$\pm 0.042$ | 0.202<br>$\pm 0.035$ | 0.140<br>$\pm 0.005$  | 0.165<br>$\pm 0.020$ | 0.228<br>$\pm 0.054$ | 0.143<br>$\pm 0.000$ | 0.143<br>$\pm 0.017$ | 0.274<br>$\pm 0.043$        | 0.212<br>$\pm 0.036$  | 0.279<br>$\pm 0.040$ | 0.186<br>$\pm 0.025$ | <b>0.297</b><br>$\pm 0.034$ | 0.190<br>$\pm 0.026$ |
|         | Acc <sub>2</sub> | <b>0.498</b><br>$\pm 0.024$ | <b>0.498</b><br>$\pm 0.033$ | 0.455<br>$\pm 0.032$ | 0.490<br>$\pm 0.031$        | 0.271<br>$\pm 0.027$ | 0.310<br>$\pm 0.035$ | 0.414<br>$\pm 0.050$ | 0.317<br>$\pm 0.056$ | 0.336<br>$\pm 0.032$ | 0.286<br>$\pm 0.000$  | 0.318<br>$\pm 0.056$ | 0.406<br>$\pm 0.024$ | 0.283<br>$\pm 0.005$ | 0.276<br>$\pm 0.010$ | 0.481<br>$\pm 0.031$        | 0.362<br>$\pm 0.048$  | 0.486<br>$\pm 0.063$ | 0.326<br>$\pm 0.030$ | 0.525<br>$\pm 0.023$        | 0.341<br>$\pm 0.029$ |
| sub10   | $\kappa$         | 0.161<br>$\pm 0.058$        | 0.178<br>$\pm 0.052$        | 0.200<br>$\pm 0.050$ | <b>0.217</b><br>$\pm 0.066$ | 0.044<br>$\pm 0.037$ | 0.017<br>$\pm 0.037$ | 0.175<br>$\pm 0.050$ | 0.064<br>$\pm 0.041$ | 0.006<br>$\pm 0.023$ | -0.014<br>$\pm 0.014$ | 0.039<br>$\pm 0.039$ | 0.033<br>$\pm 0.032$ | 0.003<br>$\pm 0.015$ | 0.019<br>$\pm 0.042$ | 0.217<br>$\pm 0.049$        | -0.003<br>$\pm 0.073$ | 0.203<br>$\pm 0.027$ | 0.017<br>$\pm 0.039$ | 0.242<br>$\pm 0.089$        | 0.011<br>$\pm 0.068$ |
|         | AUC              | 0.715<br>$\pm 0.035$        | <b>0.733</b><br>$\pm 0.029$ | 0.728<br>$\pm 0.025$ | 0.749<br>$\pm 0.026$        | 0.520<br>$\pm 0.020$ | 0.504<br>$\pm 0.019$ | 0.659<br>$\pm 0.006$ | 0.567<br>$\pm 0.036$ | 0.519<br>$\pm 0.027$ | 0.515<br>$\pm 0.030$  | 0.550<br>$\pm 0.038$ | 0.563<br>$\pm 0.030$ | 0.493<br>$\pm 0.014$ | 0.513<br>$\pm 0.039$ | 0.689<br>$\pm 0.037$        | 0.526<br>$\pm 0.067$  | 0.699<br>$\pm 0.037$ | 0.548<br>$\pm 0.037$ | 0.705<br>$\pm 0.034$        | 0.557<br>$\pm 0.054$ |
|         | BAcc             | 0.281<br>$\pm 0.050$        | 0.295<br>$\pm 0.045$        | 0.314<br>$\pm 0.043$ | <b>0.329</b><br>$\pm 0.056$ | 0.181<br>$\pm 0.032$ | 0.157<br>$\pm 0.032$ | 0.293<br>$\pm 0.043$ | 0.198<br>$\pm 0.035$ | 0.148<br>$\pm 0.020$ | 0.131<br>$\pm 0.012$  | 0.176<br>$\pm 0.033$ | 0.171<br>$\pm 0.027$ | 0.145<br>$\pm 0.013$ | 0.160<br>$\pm 0.036$ | <b>0.329</b><br>$\pm 0.042$ | 0.140<br>$\pm 0.063$  | 0.317<br>$\pm 0.023$ | 0.157<br>$\pm 0.033$ | 0.350<br>$\pm 0.077$        | 0.152<br>$\pm 0.058$ |
|         | Acc <sub>1</sub> | 0.281<br>$\pm 0.050$        | 0.295<br>$\pm 0.045$        | 0.314<br>$\pm 0.043$ | 0.329<br>$\pm 0.056$        | 0.181<br>$\pm 0.032$ | 0.157<br>$\pm 0.032$ | 0.293<br>$\pm 0.043$ | 0.198<br>$\pm 0.035$ | 0.148<br>$\pm 0.020$ | 0.136<br>$\pm 0.016$  | 0.178<br>$\pm 0.035$ | 0.171<br>$\pm 0.026$ | 0.152<br>$\pm 0.021$ | 0.160<br>$\pm 0.036$ | <b>0.329</b><br>$\pm 0.042$ | 0.140<br>$\pm 0.063$  | 0.317<br>$\pm 0.023$ | 0.155<br>$\pm 0.037$ | 0.356<br>$\pm 0.077$        | 0.152<br>$\pm 0.058$ |
|         | Acc <sub>2</sub> | 0.517<br>$\pm 0.032$        | 0.521<br>$\pm 0.033$        | 0.538<br>$\pm 0.049$ | 0.540<br>$\pm 0.059$        | 0.312<br>$\pm 0.041$ | 0.293<br>$\pm 0.039$ | 0.457<br>$\pm 0.011$ | 0.357<br>$\pm 0.047$ | 0.310<br>$\pm 0.045$ | 0.298<br>$\pm 0.028$  | 0.343<br>$\pm 0.048$ | 0.330<br>$\pm 0.043$ | 0.288<br>$\pm 0.013$ | 0.283<br>$\pm 0.036$ | <b>0.550</b><br>$\pm 0.062$ | 0.269<br>$\pm 0.082$  | 0.540<br>$\pm 0.063$ | 0.355<br>$\pm 0.075$ | 0.570<br>$\pm 0.080$        | 0.319<br>$\pm 0.068$ |
| sub11   | $\kappa$         | 0.161<br>$\pm 0.050$        | 0.200<br>$\pm 0.036$        | 0.172<br>$\pm 0.064$ | 0.203<br>$\pm 0.046$        | 0.044<br>$\pm 0.028$ | 0.011<br>$\pm 0.051$ | 0.114<br>$\pm 0.090$ | 0.019<br>$\pm 0.063$ | 0.042<br>$\pm 0.042$ | 0.011<br>$\pm 0.025$  | 0.017<br>$\pm 0.057$ | 0.100<br>$\pm 0.067$ | 0.011<br>$\pm 0.025$ | 0.014<br>$\pm 0.055$ | 0.153<br>$\pm 0.031$        | 0.017<br>$\pm 0.012$  | 0.225<br>$\pm 0.062$ | 0.014<br>$\pm 0.024$ | <b>0.208</b><br>$\pm 0.024$ | 0.028<br>$\pm 0.042$ |
|         | AUC              | <b>0.721</b><br>$\pm 0.025$ | 0.705<br>$\pm 0.010$        | 0.689<br>$\pm 0.034$ | 0.727<br>$\pm 0.018$        | 0.553<br>$\pm 0.019$ | 0.505<br>$\pm 0.020$ | 0.622<br>$\pm 0.066$ | 0.525<br>$\pm 0.033$ | 0.554<br>$\pm 0.044$ | 0.535<br>$\pm 0.028$  | 0.524<br>$\pm 0.025$ | 0.587<br>$\pm 0.036$ | 0.497<br>$\pm 0.018$ | 0.527<br>$\pm 0.042$ | 0.661<br>$\pm 0.026$        | 0.567<br>$\pm 0.045$  | 0.672<br>$\pm 0.030$ | 0.597<br>$\pm 0.046$ | 0.659<br>$\pm 0.023$        | 0.581<br>$\pm 0.047$ |
|         | BAcc             | 0.281<br>$\pm 0.043$        | 0.314<br>$\pm 0.031$        | 0.290<br>$\pm 0.055$ | 0.317<br>$\pm 0.039$        | 0.181<br>$\pm 0.024$ | 0.152<br>$\pm 0.044$ | 0.240<br>$\pm 0.077$ | 0.160<br>$\pm 0.054$ | 0.179<br>$\pm 0.036$ | 0.152<br>$\pm 0.021$  | 0.157<br>$\pm 0.049$ | 0.229<br>$\pm 0.057$ | 0.152<br>$\pm 0.021$ | 0.155<br>$\pm 0.047$ | 0.274<br>$\pm 0.027$        | 0.157<br>$\pm 0.010$  | 0.336<br>$\pm 0.054$ | 0.155<br>$\pm 0.021$ | <b>0.321</b><br>$\pm 0.021$ | 0.167<br>$\pm 0.036$ |
|         | Acc <sub>1</sub> | 0.281<br>$\pm 0.043$        | 0.314<br>$\pm 0.031$        | 0.290<br>$\pm 0.055$ | 0.317<br>$\pm 0.039$        | 0.181<br>$\pm 0.024$ | 0.152<br>$\pm 0.044$ | 0.243<br>$\pm 0.082$ | 0.160<br>$\pm 0.054$ | 0.179<br>$\pm 0.036$ | 0.150<br>$\pm 0.016$  | 0.152<br>$\pm 0.051$ | 0.226<br>$\pm 0.057$ | 0.140<br>$\pm 0.040$ | 0.155<br>$\pm 0.048$ | 0.274<br>$\pm 0.027$        | 0.157<br>$\pm 0.010$  | 0.333<br>$\pm 0.049$ | 0.155<br>$\pm 0.021$ | <b>0.318</b><br>$\pm 0.024$ | 0.166<br>$\pm 0.044$ |
|         | Acc <sub>2</sub> | 0.452<br>$\pm 0.052$        | 0.471<br>$\pm 0.025$        | 0.481<br>$\pm 0.039$ | 0.469<br>$\pm 0.034$        | 0.345<br>$\pm 0.048$ | 0.295<br>$\pm 0.040$ | 0.429<br>$\pm 0.077$ | 0.314<br>$\pm 0.052$ | 0.350<br>$\pm 0.040$ | 0.286<br>$\pm 0.008$  | 0.302<br>$\pm 0.054$ | 0.369<br>$\pm 0.065$ | 0.293<br>$\pm 0.031$ | 0.329<br>$\pm 0.068$ | 0.462<br>$\pm 0.027$        | 0.326<br>$\pm 0.026$  | 0.518<br>$\pm 0.037$ | 0.324<br>$\pm 0.031$ | <b>0.490</b><br>$\pm 0.015$ | 0.343<br>$\pm 0.069$ |

Continued on next page



| SubjectMetric |                  | DeepConvnet                 | EEGNet                      | Conformer                   | CTNet                       | BIOT (f)             | BIOT (l)              | BENDR (f)            | BENDR (l)            | CBraMod (f)          | CBraMod (l)           | EEGPT (f)            | EEGPT (l)            | LaBraM (f)           | LaBraM (l)           | STEEGformer-s (f)           | STEEGformer-s (l)     | STEEGformer-b (f)    | STEEGformer-b (l)     | STEEGformer-l (f)           | STEEGformer-l (l)     |
|---------------|------------------|-----------------------------|-----------------------------|-----------------------------|-----------------------------|----------------------|-----------------------|----------------------|----------------------|----------------------|-----------------------|----------------------|----------------------|----------------------|----------------------|-----------------------------|-----------------------|----------------------|-----------------------|-----------------------------|-----------------------|
| sub12         | $\kappa$         | 0.172<br>$\pm 0.053$        | 0.092<br>$\pm 0.041$        | 0.128<br>$\pm 0.055$        | 0.158<br>$\pm 0.050$        | 0.011<br>$\pm 0.012$ | 0.053<br>$\pm 0.045$  | 0.106<br>$\pm 0.088$ | 0.025<br>$\pm 0.035$ | 0.028<br>$\pm 0.035$ | -0.011<br>$\pm 0.027$ | 0.022<br>$\pm 0.059$ | 0.092<br>$\pm 0.021$ | 0.000<br>$\pm 0.020$ | 0.019<br>$\pm 0.045$ | <b>0.192</b><br>$\pm 0.041$ | 0.064<br>$\pm 0.038$  | 0.158<br>$\pm 0.016$ | 0.078<br>$\pm 0.029$  | 0.194<br>$\pm 0.035$        | 0.064<br>$\pm 0.030$  |
|               | AUC              | 0.699<br>$\pm 0.029$        | 0.671<br>$\pm 0.028$        | 0.637<br>$\pm 0.041$        | <b>0.695</b><br>$\pm 0.031$ | 0.518<br>$\pm 0.016$ | 0.537<br>$\pm 0.052$  | 0.611<br>$\pm 0.037$ | 0.547<br>$\pm 0.040$ | 0.552<br>$\pm 0.050$ | 0.526<br>$\pm 0.046$  | 0.538<br>$\pm 0.040$ | 0.575<br>$\pm 0.022$ | 0.511<br>$\pm 0.040$ | 0.515<br>$\pm 0.051$ | 0.653<br>$\pm 0.032$        | 0.575<br>$\pm 0.015$  | 0.668<br>$\pm 0.016$ | 0.593<br>$\pm 0.005$  | 0.659<br>$\pm 0.027$        | 0.608<br>$\pm 0.036$  |
|               | BAcc             | 0.290<br>$\pm 0.046$        | 0.221<br>$\pm 0.035$        | 0.252<br>$\pm 0.047$        | 0.279<br>$\pm 0.043$        | 0.152<br>$\pm 0.010$ | 0.188<br>$\pm 0.039$  | 0.233<br>$\pm 0.075$ | 0.164<br>$\pm 0.030$ | 0.167<br>$\pm 0.030$ | 0.133<br>$\pm 0.023$  | 0.162<br>$\pm 0.051$ | 0.221<br>$\pm 0.018$ | 0.143<br>$\pm 0.017$ | 0.160<br>$\pm 0.038$ | <b>0.307</b><br>$\pm 0.035$ | 0.198<br>$\pm 0.032$  | 0.279<br>$\pm 0.014$ | 0.210<br>$\pm 0.025$  | 0.310<br>$\pm 0.030$        | 0.198<br>$\pm 0.026$  |
|               | Acc <sub>1</sub> | 0.290<br>$\pm 0.046$        | 0.221<br>$\pm 0.035$        | 0.252<br>$\pm 0.047$        | 0.281<br>$\pm 0.042$        | 0.152<br>$\pm 0.010$ | 0.188<br>$\pm 0.039$  | 0.233<br>$\pm 0.075$ | 0.164<br>$\pm 0.030$ | 0.167<br>$\pm 0.030$ | 0.136<br>$\pm 0.023$  | 0.159<br>$\pm 0.046$ | 0.217<br>$\pm 0.015$ | 0.152<br>$\pm 0.010$ | 0.160<br>$\pm 0.038$ | <b>0.307</b><br>$\pm 0.035$ | 0.198<br>$\pm 0.032$  | 0.274<br>$\pm 0.015$ | 0.207<br>$\pm 0.027$  | 0.317<br>$\pm 0.036$        | 0.200<br>$\pm 0.029$  |
|               | Acc <sub>2</sub> | <b>0.486</b><br>$\pm 0.054$ | 0.436<br>$\pm 0.057$        | 0.448<br>$\pm 0.082$        | 0.479<br>$\pm 0.055$        | 0.324<br>$\pm 0.051$ | 0.307<br>$\pm 0.057$  | 0.398<br>$\pm 0.071$ | 0.350<br>$\pm 0.041$ | 0.350<br>$\pm 0.064$ | 0.271<br>$\pm 0.026$  | 0.306<br>$\pm 0.068$ | 0.367<br>$\pm 0.026$ | 0.299<br>$\pm 0.037$ | 0.317<br>$\pm 0.052$ | 0.471<br>$\pm 0.052$        | 0.338<br>$\pm 0.046$  | 0.477<br>$\pm 0.048$ | 0.376<br>$\pm 0.018$  | 0.493<br>$\pm 0.065$        | 0.388<br>$\pm 0.050$  |
| sub13         | $\kappa$         | 0.161<br>$\pm 0.053$        | 0.136<br>$\pm 0.027$        | <b>0.206</b><br>$\pm 0.036$ | 0.172<br>$\pm 0.025$        | 0.017<br>$\pm 0.049$ | -0.003<br>$\pm 0.037$ | 0.125<br>$\pm 0.045$ | 0.025<br>$\pm 0.042$ | 0.036<br>$\pm 0.042$ | 0.003<br>$\pm 0.006$  | 0.050<br>$\pm 0.073$ | 0.061<br>$\pm 0.047$ | 0.011<br>$\pm 0.025$ | 0.011<br>$\pm 0.050$ | 0.175<br>$\pm 0.078$        | -0.006<br>$\pm 0.036$ | 0.186<br>$\pm 0.067$ | -0.003<br>$\pm 0.041$ | 0.258<br>$\pm 0.056$        | -0.011<br>$\pm 0.018$ |
|               | AUC              | 0.689<br>$\pm 0.029$        | 0.674<br>$\pm 0.034$        | <b>0.699</b><br>$\pm 0.025$ | 0.687<br>$\pm 0.019$        | 0.517<br>$\pm 0.020$ | 0.496<br>$\pm 0.037$  | 0.642<br>$\pm 0.015$ | 0.535<br>$\pm 0.057$ | 0.525<br>$\pm 0.035$ | 0.498<br>$\pm 0.042$  | 0.541<br>$\pm 0.037$ | 0.614<br>$\pm 0.030$ | 0.500<br>$\pm 0.005$ | 0.501<br>$\pm 0.049$ | 0.669<br>$\pm 0.038$        | 0.534<br>$\pm 0.037$  | 0.671<br>$\pm 0.041$ | 0.524<br>$\pm 0.018$  | 0.702<br>$\pm 0.030$        | 0.540<br>$\pm 0.057$  |
|               | BAcc             | 0.281<br>$\pm 0.045$        | 0.260<br>$\pm 0.023$        | <b>0.319</b><br>$\pm 0.031$ | 0.290<br>$\pm 0.022$        | 0.157<br>$\pm 0.042$ | 0.140<br>$\pm 0.032$  | 0.250<br>$\pm 0.039$ | 0.164<br>$\pm 0.036$ | 0.174<br>$\pm 0.036$ | 0.145<br>$\pm 0.005$  | 0.186<br>$\pm 0.062$ | 0.195<br>$\pm 0.040$ | 0.152<br>$\pm 0.021$ | 0.152<br>$\pm 0.043$ | 0.293<br>$\pm 0.067$        | 0.138<br>$\pm 0.031$  | 0.302<br>$\pm 0.057$ | 0.140<br>$\pm 0.035$  | 0.364<br>$\pm 0.048$        | 0.133<br>$\pm 0.016$  |
|               | Acc <sub>1</sub> | 0.281<br>$\pm 0.045$        | 0.260<br>$\pm 0.023$        | <b>0.319</b><br>$\pm 0.031$ | 0.290<br>$\pm 0.022$        | 0.160<br>$\pm 0.051$ | 0.140<br>$\pm 0.032$  | 0.250<br>$\pm 0.039$ | 0.164<br>$\pm 0.036$ | 0.172<br>$\pm 0.036$ | 0.145<br>$\pm 0.005$  | 0.181<br>$\pm 0.064$ | 0.190<br>$\pm 0.043$ | 0.144<br>$\pm 0.018$ | 0.152<br>$\pm 0.043$ | 0.293<br>$\pm 0.067$        | 0.138<br>$\pm 0.031$  | 0.308<br>$\pm 0.059$ | 0.140<br>$\pm 0.035$  | 0.375<br>$\pm 0.049$        | 0.130<br>$\pm 0.012$  |
|               | Acc <sub>2</sub> | 0.486<br>$\pm 0.047$        | 0.443<br>$\pm 0.028$        | <b>0.536</b><br>$\pm 0.031$ | 0.464<br>$\pm 0.031$        | 0.290<br>$\pm 0.042$ | 0.274<br>$\pm 0.062$  | 0.424<br>$\pm 0.031$ | 0.324<br>$\pm 0.057$ | 0.321<br>$\pm 0.052$ | 0.288<br>$\pm 0.005$  | 0.338<br>$\pm 0.055$ | 0.370<br>$\pm 0.066$ | 0.284<br>$\pm 0.013$ | 0.286<br>$\pm 0.061$ | 0.490<br>$\pm 0.051$        | 0.286<br>$\pm 0.034$  | 0.490<br>$\pm 0.075$ | 0.283<br>$\pm 0.023$  | 0.581<br>$\pm 0.077$        | 0.287<br>$\pm 0.027$  |
| sub14         | $\kappa$         | 0.242<br>$\pm 0.076$        | 0.239<br>$\pm 0.065$        | 0.206<br>$\pm 0.085$        | <b>0.314</b><br>$\pm 0.032$ | 0.061<br>$\pm 0.035$ | 0.014<br>$\pm 0.024$  | 0.158<br>$\pm 0.036$ | 0.050<br>$\pm 0.035$ | 0.086<br>$\pm 0.075$ | 0.000<br>$\pm 0.000$  | 0.019<br>$\pm 0.059$ | 0.114<br>$\pm 0.041$ | 0.006<br>$\pm 0.012$ | 0.025<br>$\pm 0.012$ | 0.242<br>$\pm 0.048$        | 0.078<br>$\pm 0.038$  | 0.264<br>$\pm 0.054$ | 0.011<br>$\pm 0.023$  | 0.317<br>$\pm 0.065$        | 0.033<br>$\pm 0.012$  |
|               | AUC              | 0.750<br>$\pm 0.031$        | <b>0.750</b><br>$\pm 0.019$ | 0.716<br>$\pm 0.030$        | 0.776<br>$\pm 0.028$        | 0.550<br>$\pm 0.020$ | 0.548<br>$\pm 0.025$  | 0.638<br>$\pm 0.027$ | 0.541<br>$\pm 0.020$ | 0.556<br>$\pm 0.051$ | 0.436<br>$\pm 0.029$  | 0.556<br>$\pm 0.018$ | 0.608<br>$\pm 0.031$ | 0.528<br>$\pm 0.062$ | 0.503<br>$\pm 0.066$ | 0.723<br>$\pm 0.029$        | 0.595<br>$\pm 0.056$  | 0.684<br>$\pm 0.037$ | 0.580<br>$\pm 0.025$  | 0.733<br>$\pm 0.025$        | 0.595<br>$\pm 0.031$  |
|               | BAcc             | 0.350<br>$\pm 0.066$        | 0.348<br>$\pm 0.055$        | 0.319<br>$\pm 0.073$        | <b>0.412</b><br>$\pm 0.027$ | 0.195<br>$\pm 0.030$ | 0.155<br>$\pm 0.021$  | 0.279<br>$\pm 0.031$ | 0.186<br>$\pm 0.030$ | 0.217<br>$\pm 0.064$ | 0.143<br>$\pm 0.000$  | 0.160<br>$\pm 0.050$ | 0.240<br>$\pm 0.035$ | 0.148<br>$\pm 0.011$ | 0.164<br>$\pm 0.010$ | 0.350<br>$\pm 0.041$        | 0.210<br>$\pm 0.032$  | 0.369<br>$\pm 0.046$ | 0.152<br>$\pm 0.020$  | 0.414<br>$\pm 0.055$        | 0.171<br>$\pm 0.011$  |
|               | Acc <sub>1</sub> | 0.350<br>$\pm 0.066$        | 0.345<br>$\pm 0.055$        | 0.319<br>$\pm 0.073$        | <b>0.410</b><br>$\pm 0.032$ | 0.195<br>$\pm 0.030$ | 0.155<br>$\pm 0.021$  | 0.279<br>$\pm 0.031$ | 0.186<br>$\pm 0.030$ | 0.217<br>$\pm 0.064$ | 0.145<br>$\pm 0.005$  | 0.166<br>$\pm 0.057$ | 0.239<br>$\pm 0.037$ | 0.148<br>$\pm 0.011$ | 0.160<br>$\pm 0.014$ | 0.350<br>$\pm 0.041$        | 0.210<br>$\pm 0.032$  | 0.369<br>$\pm 0.046$ | 0.152<br>$\pm 0.020$  | 0.410<br>$\pm 0.045$        | 0.170<br>$\pm 0.011$  |
|               | Acc <sub>2</sub> | 0.538<br>$\pm 0.057$        | 0.562<br>$\pm 0.047$        | 0.507<br>$\pm 0.043$        | 0.605<br>$\pm 0.030$        | 0.329<br>$\pm 0.037$ | 0.288<br>$\pm 0.010$  | 0.445<br>$\pm 0.039$ | 0.352<br>$\pm 0.018$ | 0.367<br>$\pm 0.087$ | 0.271<br>$\pm 0.032$  | 0.375<br>$\pm 0.037$ | 0.420<br>$\pm 0.058$ | 0.298<br>$\pm 0.027$ | 0.298<br>$\pm 0.027$ | 0.583<br>$\pm 0.069$        | 0.357<br>$\pm 0.044$  | 0.519<br>$\pm 0.068$ | 0.319<br>$\pm 0.036$  | <b>0.596</b><br>$\pm 0.037$ | 0.351<br>$\pm 0.043$  |
| sub15         | $\kappa$         | <b>0.239</b><br>$\pm 0.049$ | 0.172<br>$\pm 0.054$        | 0.197<br>$\pm 0.035$        | 0.200<br>$\pm 0.039$        | 0.042<br>$\pm 0.048$ | 0.028<br>$\pm 0.026$  | 0.156<br>$\pm 0.049$ | 0.036<br>$\pm 0.068$ | 0.064<br>$\pm 0.047$ | -0.006<br>$\pm 0.012$ | 0.008<br>$\pm 0.070$ | 0.072<br>$\pm 0.049$ | 0.008<br>$\pm 0.027$ | 0.000<br>$\pm 0.010$ | 0.217<br>$\pm 0.070$        | 0.031<br>$\pm 0.042$  | 0.211<br>$\pm 0.060$ | 0.067<br>$\pm 0.070$  | 0.272<br>$\pm 0.112$        | 0.072<br>$\pm 0.043$  |

Continued on next page

Continued on next page

| SubjectMetric |       | DeepConvnet     | EEGNet          | Conformer       | CTNet           | BIOT (f)        | BIOT (l)        | BENDR (f)       | BENDR (l)       | CBraMod (f)     | CBraMod (l)      | EEGPT (f)       | EEGPT (l)       | LaBraM (f)       | LaBraM (l)      | STEEGformer-s (f) | STEEGformer-s (l) | STEEGformer-b (f) | STEEGformer-b (l) | STEEGformer-l (f) | STEEGformer-l (l) |
|---------------|-------|-----------------|-----------------|-----------------|-----------------|-----------------|-----------------|-----------------|-----------------|-----------------|------------------|-----------------|-----------------|------------------|-----------------|-------------------|-------------------|-------------------|-------------------|-------------------|-------------------|
| sub5          | BAcc  | 0.290<br>±0.059 | 0.310<br>±0.055 | 0.362<br>±0.047 | 0.307<br>±0.035 | 0.205<br>±0.045 | 0.138<br>±0.018 | 0.288<br>±0.075 | 0.176<br>±0.035 | 0.169<br>±0.027 | 0.143<br>±0.000  | 0.217<br>±0.013 | 0.219<br>±0.043 | 0.143<br>±0.000  | 0.140<br>±0.026 | 0.548<br>±0.073   | 0.260<br>±0.055   | 0.605<br>±0.097   | 0.269<br>±0.031   | 0.598<br>±0.059   | 0.288<br>±0.031   |
|               | Acc_1 | 0.290<br>±0.059 | 0.310<br>±0.055 | 0.362<br>±0.047 | 0.307<br>±0.035 | 0.205<br>±0.045 | 0.138<br>±0.018 | 0.288<br>±0.075 | 0.176<br>±0.035 | 0.169<br>±0.027 | 0.143<br>±0.000  | 0.217<br>±0.017 | 0.215<br>±0.040 | 0.145<br>±0.005  | 0.143<br>±0.021 | 0.548<br>±0.073   | 0.260<br>±0.055   | 0.605<br>±0.097   | 0.269<br>±0.031   | 0.603<br>±0.062   | 0.296<br>±0.036   |
|               | Acc_2 | 0.519<br>±0.074 | 0.555<br>±0.041 | 0.569<br>±0.069 | 0.571<br>±0.019 | 0.348<br>±0.028 | 0.293<br>±0.007 | 0.481<br>±0.062 | 0.326<br>±0.023 | 0.295<br>±0.031 | 0.295<br>±0.021  | 0.379<br>±0.097 | 0.397<br>±0.026 | 0.293<br>±0.016  | 0.279<br>±0.022 | 0.717<br>±0.041   | 0.405<br>±0.048   | 0.774<br>±0.058   | 0.440<br>±0.035   | 0.759<br>±0.034   | 0.508<br>±0.043   |
|               | κ     | 0.231<br>±0.038 | 0.189<br>±0.045 | 0.178<br>±0.068 | 0.239<br>±0.039 | 0.042<br>±0.028 | 0.014<br>±0.035 | 0.192<br>±0.043 | 0.061<br>±0.049 | 0.053<br>±0.041 | 0.000<br>±0.000  | 0.067<br>±0.045 | 0.058<br>±0.066 | -0.003<br>±0.006 | 0.003<br>±0.025 | 0.253<br>±0.108   | 0.061<br>±0.035   | 0.242<br>±0.040   | 0.069<br>±0.031   | 0.311<br>±0.064   | 0.078<br>±0.056   |
|               | AUC   | 0.737<br>±0.023 | 0.716<br>±0.021 | 0.693<br>±0.034 | 0.745<br>±0.025 | 0.532<br>±0.026 | 0.517<br>±0.037 | 0.645<br>±0.030 | 0.553<br>±0.029 | 0.544<br>±0.025 | 0.531<br>±0.019  | 0.581<br>±0.017 | 0.571<br>±0.065 | 0.500<br>±0.001  | 0.509<br>±0.038 | 0.706<br>±0.077   | 0.598<br>±0.048   | 0.698<br>±0.040   | 0.600<br>±0.052   | 0.751<br>±0.041   | 0.611<br>±0.047   |
|               | BAcc  | 0.340<br>±0.032 | 0.305<br>±0.038 | 0.295<br>±0.058 | 0.348<br>±0.033 | 0.179<br>±0.024 | 0.155<br>±0.030 | 0.307<br>±0.037 | 0.195<br>±0.042 | 0.188<br>±0.035 | 0.143<br>±0.000  | 0.200<br>±0.039 | 0.193<br>±0.057 | 0.140<br>±0.005  | 0.145<br>±0.021 | 0.360<br>±0.093   | 0.195<br>±0.030   | 0.350<br>±0.034   | 0.202<br>±0.027   | 0.410<br>±0.055   | 0.210<br>±0.048   |
|               | Acc_1 | 0.340<br>±0.032 | 0.302<br>±0.040 | 0.295<br>±0.058 | 0.348<br>±0.033 | 0.184<br>±0.026 | 0.154<br>±0.034 | 0.307<br>±0.037 | 0.195<br>±0.042 | 0.186<br>±0.039 | 0.143<br>±0.000  | 0.200<br>±0.033 | 0.193<br>±0.056 | 0.141<br>±0.009  | 0.145<br>±0.021 | 0.360<br>±0.093   | 0.195<br>±0.030   | 0.351<br>±0.043   | 0.205<br>±0.031   | 0.411<br>±0.070   | 0.206<br>±0.053   |
|               | Acc_2 | 0.550<br>±0.028 | 0.510<br>±0.031 | 0.502<br>±0.032 | 0.574<br>±0.042 | 0.307<br>±0.035 | 0.304<br>±0.020 | 0.479<br>±0.047 | 0.360<br>±0.042 | 0.348<br>±0.050 | 0.286<br>±0.000  | 0.359<br>±0.038 | 0.343<br>±0.069 | 0.281<br>±0.015  | 0.302<br>±0.034 | 0.583<br>±0.104   | 0.357<br>±0.047   | 0.547<br>±0.046   | 0.383<br>±0.063   | 0.618<br>±0.075   | 0.393<br>±0.075   |
| sub6          | κ     | 0.219<br>±0.065 | 0.169<br>±0.045 | 0.167<br>±0.040 | 0.247<br>±0.095 | 0.019<br>±0.036 | 0.014<br>±0.022 | 0.114<br>±0.048 | 0.053<br>±0.067 | 0.056<br>±0.050 | 0.006<br>±0.035  | 0.042<br>±0.044 | 0.094<br>±0.042 | 0.022<br>±0.021  | 0.006<br>±0.033 | 0.217<br>±0.050   | 0.122<br>±0.028   | 0.217<br>±0.041   | 0.086<br>±0.045   | 0.217<br>±0.032   | 0.144<br>±0.030   |
|               | AUC   | 0.722<br>±0.034 | 0.706<br>±0.027 | 0.703<br>±0.029 | 0.744<br>±0.025 | 0.533<br>±0.025 | 0.496<br>±0.066 | 0.631<br>±0.054 | 0.534<br>±0.049 | 0.580<br>±0.014 | 0.438<br>±0.037  | 0.553<br>±0.017 | 0.607<br>±0.035 | 0.580<br>±0.077  | 0.525<br>±0.047 | 0.692<br>±0.047   | 0.651<br>±0.034   | 0.684<br>±0.030   | 0.641<br>±0.049   | 0.688<br>±0.011   | 0.653<br>±0.047   |
|               | BAcc  | 0.331<br>±0.055 | 0.288<br>±0.039 | 0.286<br>±0.035 | 0.355<br>±0.081 | 0.160<br>±0.031 | 0.155<br>±0.019 | 0.240<br>±0.041 | 0.188<br>±0.057 | 0.190<br>±0.043 | 0.148<br>±0.030  | 0.179<br>±0.038 | 0.224<br>±0.036 | 0.162<br>±0.018  | 0.148<br>±0.029 | 0.329<br>±0.043   | 0.248<br>±0.024   | 0.329<br>±0.035   | 0.217<br>±0.039   | 0.329<br>±0.027   | 0.267<br>±0.026   |
|               | Acc_1 | 0.331<br>±0.055 | 0.288<br>±0.039 | 0.286<br>±0.035 | 0.360<br>±0.086 | 0.160<br>±0.031 | 0.155<br>±0.019 | 0.240<br>±0.041 | 0.188<br>±0.057 | 0.190<br>±0.043 | 0.150<br>±0.026  | 0.177<br>±0.039 | 0.227<br>±0.039 | 0.160<br>±0.018  | 0.148<br>±0.029 | 0.329<br>±0.043   | 0.248<br>±0.024   | 0.329<br>±0.035   | 0.217<br>±0.039   | 0.328<br>±0.029   | 0.267<br>±0.026   |
|               | Acc_2 | 0.517<br>±0.068 | 0.498<br>±0.042 | 0.490<br>±0.055 | 0.519<br>±0.053 | 0.331<br>±0.041 | 0.286<br>±0.048 | 0.410<br>±0.071 | 0.331<br>±0.060 | 0.350<br>±0.038 | 0.274<br>±0.008  | 0.373<br>±0.042 | 0.400<br>±0.060 | 0.326<br>±0.060  | 0.290<br>±0.026 | 0.540<br>±0.050   | 0.412<br>±0.047   | 0.521<br>±0.055   | 0.383<br>±0.030   | 0.502<br>±0.049   | 0.431<br>±0.053   |
| sub7          | κ     | 0.194<br>±0.043 | 0.197<br>±0.053 | 0.150<br>±0.057 | 0.208<br>±0.042 | 0.019<br>±0.065 | 0.036<br>±0.085 | 0.094<br>±0.023 | 0.069<br>±0.038 | 0.017<br>±0.039 | -0.006<br>±0.012 | 0.039<br>±0.018 | 0.042<br>±0.043 | 0.017<br>±0.037  | 0.050<br>±0.032 | 0.269<br>±0.066   | 0.075<br>±0.058   | 0.239<br>±0.065   | 0.042<br>±0.056   | 0.286<br>±0.072   | 0.081<br>±0.045   |
|               | AUC   | 0.736<br>±0.033 | 0.729<br>±0.017 | 0.680<br>±0.040 | 0.748<br>±0.016 | 0.523<br>±0.031 | 0.517<br>±0.049 | 0.627<br>±0.024 | 0.555<br>±0.024 | 0.529<br>±0.035 | 0.563<br>±0.033  | 0.569<br>±0.036 | 0.581<br>±0.033 | 0.507<br>±0.023  | 0.535<br>±0.041 | 0.725<br>±0.039   | 0.588<br>±0.041   | 0.708<br>±0.026   | 0.572<br>±0.028   | 0.731<br>±0.042   | 0.618<br>±0.030   |
|               | BAcc  | 0.310<br>±0.037 | 0.312<br>±0.046 | 0.271<br>±0.049 | 0.321<br>±0.036 | 0.160<br>±0.056 | 0.174<br>±0.073 | 0.224<br>±0.020 | 0.202<br>±0.033 | 0.157<br>±0.033 | 0.138<br>±0.011  | 0.176<br>±0.016 | 0.179<br>±0.037 | 0.157<br>±0.032  | 0.186<br>±0.027 | 0.374<br>±0.056   | 0.207<br>±0.050   | 0.348<br>±0.055   | 0.179<br>±0.048   | 0.388<br>±0.062   | 0.212<br>±0.039   |
|               |       |                 |                 |                 |                 |                 |                 |                 |                 |                 |                  |                 |                 |                  |                 |                   |                   |                   |                   |                   |                   |

Continued on next page

| SubjectMetric |          | DeepConvnet                    | EEGNet          | Conformer       | CTNet                          | BIOT (f)        | BIOT (l)        | BENDR (f)       | BENDR (l)       | CBraMod (f)     | CBraMod (l)      | EEGPT (f)       | EEGPT (l)       | LaBraM (f)      | LaBraM (l)       | STEEGformer-s (j)              | STEEGformer-s (l) | STEEGformer-b (j)              | STEEGformer-b (l) | STEEGformer-l (j)              | STEEGformer-l (l) |
|---------------|----------|--------------------------------|-----------------|-----------------|--------------------------------|-----------------|-----------------|-----------------|-----------------|-----------------|------------------|-----------------|-----------------|-----------------|------------------|--------------------------------|-------------------|--------------------------------|-------------------|--------------------------------|-------------------|
| sub8          | Acc.1    | 0.312<br>±0.040                | 0.312<br>±0.046 | 0.271<br>±0.049 | 0.321<br>±0.036                | 0.160<br>±0.056 | 0.174<br>±0.073 | 0.224<br>±0.020 | 0.202<br>±0.033 | 0.157<br>±0.033 | 0.136<br>±0.016  | 0.168<br>±0.012 | 0.181<br>±0.035 | 0.157<br>±0.032 | 0.188<br>±0.028  | <b>0.374</b><br>± <b>0.056</b> | 0.207<br>±0.050   | 0.348<br>±0.055                | 0.179<br>±0.048   | 0.398<br>±0.060                | 0.212<br>±0.042   |
|               | Acc.2    | 0.550<br>±0.084                | 0.552<br>±0.031 | 0.495<br>±0.052 | 0.552<br>±0.027                | 0.305<br>±0.061 | 0.302<br>±0.059 | 0.426<br>±0.052 | 0.338<br>±0.052 | 0.300<br>±0.055 | 0.276<br>±0.013  | 0.341<br>±0.039 | 0.378<br>±0.050 | 0.302<br>±0.026 | 0.312<br>±0.035  | <b>0.598</b><br>± <b>0.039</b> | 0.345<br>±0.066   | 0.583<br>±0.039                | 0.331<br>±0.035   | 0.602<br>±0.072                | 0.348<br>±0.057   |
|               | $\kappa$ | 0.142<br>±0.039                | 0.086<br>±0.045 | 0.078<br>±0.032 | 0.125<br>±0.064                | 0.014<br>±0.058 | 0.006<br>±0.053 | 0.097<br>±0.058 | 0.017<br>±0.039 | 0.011<br>±0.045 | -0.006<br>±0.025 | 0.008<br>±0.027 | 0.008<br>±0.050 | 0.006<br>±0.021 | -0.011<br>±0.051 | 0.111<br>±0.064                | 0.006<br>±0.032   | 0.125<br>±0.104                | 0.022<br>±0.023   | <b>0.131</b><br>± <b>0.041</b> | 0.000<br>±0.022   |
|               | AUC      | 0.693<br>±0.023                | 0.684<br>±0.021 | 0.642<br>±0.035 | <b>0.688</b><br>± <b>0.037</b> | 0.537<br>±0.041 | 0.498<br>±0.033 | 0.614<br>±0.039 | 0.535<br>±0.045 | 0.520<br>±0.032 | 0.465<br>±0.024  | 0.543<br>±0.028 | 0.556<br>±0.022 | 0.516<br>±0.023 | 0.489<br>±0.048  | 0.634<br>±0.046                | 0.521<br>±0.013   | 0.637<br>±0.036                | 0.532<br>±0.028   | 0.628<br>±0.028                | 0.526<br>±0.023   |
|               | BAcc     | 0.264<br>±0.033                | 0.217<br>±0.039 | 0.210<br>±0.027 | 0.250<br>±0.055                | 0.155<br>±0.050 | 0.148<br>±0.046 | 0.226<br>±0.050 | 0.157<br>±0.033 | 0.152<br>±0.039 | 0.138<br>±0.022  | 0.150<br>±0.023 | 0.150<br>±0.043 | 0.148<br>±0.018 | 0.133<br>±0.044  | 0.238<br>±0.055                | 0.148<br>±0.027   | 0.250<br>±0.089                | 0.162<br>±0.020   | <b>0.255</b><br>± <b>0.035</b> | 0.143<br>±0.019   |
|               | Acc.1    | 0.264<br>±0.033                | 0.217<br>±0.039 | 0.210<br>±0.027 | 0.250<br>±0.055                | 0.155<br>±0.050 | 0.148<br>±0.046 | 0.226<br>±0.050 | 0.157<br>±0.033 | 0.152<br>±0.039 | 0.140<br>±0.018  | 0.151<br>±0.023 | 0.146<br>±0.037 | 0.148<br>±0.018 | 0.140<br>±0.035  | 0.238<br>±0.055                | 0.148<br>±0.027   | 0.250<br>±0.089                | 0.162<br>±0.020   | <b>0.253</b><br>± <b>0.032</b> | 0.143<br>±0.019   |
|               | Acc.2    | 0.450<br>±0.054                | 0.429<br>±0.037 | 0.424<br>±0.077 | 0.488<br>±0.055                | 0.310<br>±0.050 | 0.295<br>±0.036 | 0.424<br>±0.052 | 0.324<br>±0.047 | 0.305<br>±0.029 | 0.262<br>±0.028  | 0.319<br>±0.030 | 0.322<br>±0.045 | 0.293<br>±0.023 | 0.293<br>±0.063  | 0.455<br>±0.063                | 0.283<br>±0.024   | <b>0.481</b><br>± <b>0.089</b> | 0.300<br>±0.042   | 0.448<br>±0.044                | 0.293<br>±0.031   |
|               | $\kappa$ | 0.133<br>±0.027                | 0.078<br>±0.054 | 0.058<br>±0.023 | 0.108<br>±0.035                | 0.042<br>±0.046 | 0.000<br>±0.035 | 0.058<br>±0.057 | 0.006<br>±0.021 | 0.031<br>±0.042 | 0.011<br>±0.025  | 0.025<br>±0.044 | 0.069<br>±0.029 | 0.000<br>±0.000 | 0.006<br>±0.038  | <b>0.172</b><br>± <b>0.082</b> | 0.011<br>±0.030   | 0.161<br>±0.048                | -0.008<br>±0.040  | 0.186<br>±0.041                | -0.047<br>±0.033  |
|               | AUC      | <b>0.643</b><br>± <b>0.042</b> | 0.614<br>±0.025 | 0.594<br>±0.020 | 0.640<br>±0.034                | 0.525<br>±0.047 | 0.512<br>±0.051 | 0.566<br>±0.054 | 0.516<br>±0.025 | 0.513<br>±0.018 | 0.479<br>±0.025  | 0.525<br>±0.033 | 0.564<br>±0.023 | 0.495<br>±0.010 | 0.502<br>±0.029  | 0.642<br>±0.050                | 0.555<br>±0.036   | 0.653<br>±0.021                | 0.536<br>±0.037   | 0.641<br>±0.046                | 0.501<br>±0.027   |
|               | BAcc     | 0.257<br>±0.023                | 0.210<br>±0.047 | 0.193<br>±0.020 | 0.236<br>±0.030                | 0.179<br>±0.039 | 0.143<br>±0.030 | 0.193<br>±0.049 | 0.148<br>±0.018 | 0.169<br>±0.036 | 0.152<br>±0.021  | 0.164<br>±0.038 | 0.202<br>±0.025 | 0.143<br>±0.000 | 0.148<br>±0.032  | <b>0.290</b><br>± <b>0.070</b> | 0.152<br>±0.026   | 0.281<br>±0.041                | 0.136<br>±0.034   | 0.302<br>±0.035                | 0.102<br>±0.029   |
| sub9          | Acc.1    | 0.257<br>±0.023                | 0.210<br>±0.047 | 0.193<br>±0.020 | 0.236<br>±0.030                | 0.177<br>±0.038 | 0.143<br>±0.030 | 0.193<br>±0.049 | 0.148<br>±0.018 | 0.165<br>±0.030 | 0.150<br>±0.016  | 0.161<br>±0.038 | 0.207<br>±0.024 | 0.138<br>±0.006 | 0.150<br>±0.037  | <b>0.290</b><br>± <b>0.070</b> | 0.152<br>±0.026   | 0.278<br>±0.040                | 0.136<br>±0.034   | 0.303<br>±0.033                | 0.098<br>±0.027   |
|               | Acc.2    | 0.417<br>±0.061                | 0.405<br>±0.048 | 0.371<br>±0.034 | 0.424<br>±0.051                | 0.324<br>±0.081 | 0.286<br>±0.044 | 0.338<br>±0.062 | 0.314<br>±0.045 | 0.293<br>±0.021 | 0.279<br>±0.035  | 0.328<br>±0.026 | 0.345<br>±0.046 | 0.284<br>±0.012 | 0.295<br>±0.010  | 0.481<br>±0.060                | 0.324<br>±0.032   | 0.451<br>±0.047                | 0.293<br>±0.030   | <b>0.460</b><br>± <b>0.047</b> | 0.261<br>±0.041   |

## C.3.2 LEAVE-ONE-OUT FINE-TUNING RESULTS

Table 23: Average Leave-One-Out Fine-Tuned Performance Across All Subjects.

| Model (Training strategy) | $\kappa$     | AUC          | BAcc         | Acc.1        | Acc.2        |
|---------------------------|--------------|--------------|--------------|--------------|--------------|
|                           | 0.351        | 0.795        | 0.444        | 0.444        | 0.653        |
| <b>DeepConvnet</b>        | $\pm 0.146$  | $\pm 0.068$  | $\pm 0.125$  | $\pm 0.125$  | $\pm 0.107$  |
|                           | 0.363        | <b>0.806</b> | 0.454        | 0.453        | 0.669        |
| <b>EEGNet</b>             | $\pm 0.156$  | $\pm 0.065$  | $\pm 0.133$  | $\pm 0.133$  | $\pm 0.105$  |
|                           | 0.353        | 0.784        | 0.445        | 0.445        | 0.645        |
| <b>Conformer</b>          | $\pm 0.145$  | $\pm 0.073$  | $\pm 0.124$  | $\pm 0.124$  | $\pm 0.106$  |
|                           | 0.373        | 0.801        | 0.463        | 0.463        | 0.657        |
| <b>CTNet</b>              | $\pm 0.151$  | $\pm 0.068$  | $\pm 0.129$  | $\pm 0.129$  | $\pm 0.106$  |
|                           | 0.099        | 0.588        | 0.227        | 0.227        | 0.383        |
| <b>BIOT (f)</b>           | $\pm 0.065$  | $\pm 0.052$  | $\pm 0.055$  | $\pm 0.056$  | $\pm 0.062$  |
|                           | 0.026        | 0.540        | 0.165        | 0.165        | 0.309        |
| <b>BIOT (l)</b>           | $\pm 0.032$  | $\pm 0.042$  | $\pm 0.028$  | $\pm 0.027$  | $\pm 0.029$  |
|                           | 0.229        | 0.704        | 0.339        | 0.339        | 0.529        |
| <b>BENDR (f)</b>          | $\pm 0.092$  | $\pm 0.053$  | $\pm 0.079$  | $\pm 0.079$  | $\pm 0.066$  |
|                           | 0.055        | 0.561        | 0.190        | 0.190        | 0.352        |
| <b>BENDR (l)</b>          | $\pm 0.041$  | $\pm 0.025$  | $\pm 0.035$  | $\pm 0.035$  | $\pm 0.037$  |
|                           | 0.121        | 0.616        | 0.247        | 0.246        | 0.423        |
| <b>CBraMod (f)</b>        | $\pm 0.097$  | $\pm 0.076$  | $\pm 0.083$  | $\pm 0.081$  | $\pm 0.099$  |
|                           | 0.000        | 0.498        | 0.143        | 0.143        | 0.286        |
| <b>CBraMod (l)</b>        | $\pm 0.001$  | $\pm 0.004$  | $\pm 0.001$  | $\pm 0.001$  | $\pm 0.002$  |
|                           | 0.093        | 0.593        | 0.223        | 0.225        | 0.392        |
| <b>EEGPT (f)</b>          | $\pm 0.087$  | $\pm 0.060$  | $\pm 0.074$  | $\pm 0.075$  | $\pm 0.074$  |
|                           | 0.112        | 0.606        | 0.239        | 0.242        | 0.411        |
| <b>EEGPT (l)</b>          | $\pm 0.131$  | $\pm 0.091$  | $\pm 0.112$  | $\pm 0.114$  | $\pm 0.122$  |
|                           | 0.010        | 0.510        | 0.151        | 0.151        | 0.294        |
| <b>LaBraM (f)</b>         | $\pm 0.026$  | $\pm 0.030$  | $\pm 0.022$  | $\pm 0.023$  | $\pm 0.026$  |
|                           | -0.009       | 0.475        | 0.135        | 0.135        | 0.264        |
| <b>LaBraM (l)</b>         | $\pm 0.021$  | $\pm 0.027$  | $\pm 0.018$  | $\pm 0.018$  | $\pm 0.025$  |
|                           | <b>0.416</b> | 0.796        | <b>0.499</b> | <b>0.499</b> | 0.683        |
| <b>STEEGformer-s (f)</b>  | $\pm 0.191$  | $\pm 0.080$  | $\pm 0.164$  | $\pm 0.164$  | $\pm 0.121$  |
|                           | 0.082        | 0.598        | 0.213        | 0.213        | 0.378        |
| <b>STEEGformer-s (l)</b>  | $\pm 0.060$  | $\pm 0.067$  | $\pm 0.051$  | $\pm 0.051$  | $\pm 0.076$  |
|                           | 0.411        | 0.800        | 0.496        | 0.495        | <b>0.689</b> |
| <b>STEEGformer-b (f)</b>  | $\pm 0.187$  | $\pm 0.080$  | $\pm 0.161$  | $\pm 0.161$  | $\pm 0.120$  |
|                           | 0.111        | 0.612        | 0.238        | 0.238        | 0.392        |
| <b>STEEGformer-b (l)</b>  | $\pm 0.084$  | $\pm 0.079$  | $\pm 0.072$  | $\pm 0.072$  | $\pm 0.099$  |
|                           | 0.455        | 0.823        | 0.533        | 0.534        | 0.728        |
| <b>STEEGformer-l (f)</b>  | $\pm 0.190$  | $\pm 0.074$  | $\pm 0.163$  | $\pm 0.163$  | $\pm 0.109$  |
|                           | 0.081        | 0.611        | 0.212        | 0.213        | 0.390        |
| <b>STEEGformer-l (l)</b>  | $\pm 0.060$  | $\pm 0.062$  | $\pm 0.051$  | $\pm 0.051$  | $\pm 0.067$  |

Table 24: Per-Subject Leave-One-Out Fine-Tuned Performance.

| Subject | Metric           | DeepConvnet                 | EEGNet                      | Conformer                   | CTNet                | BIOT (f)             | BIOT (l)              | BENDR (f)            | BENDR (l)             | CBraMod (f)          | CBraMod (l)          | EEGPT (f)            | EEGPT (l)            | LaBraM (f)            | LaBraM (l)            | STEEGformer-s (f)           | STEEGformer-s (l)    | STEEGformer-b (f)           | STEEGformer-b (l)    | STEEGformer-l (f)           | STEEGformer-l (l)    |
|---------|------------------|-----------------------------|-----------------------------|-----------------------------|----------------------|----------------------|-----------------------|----------------------|-----------------------|----------------------|----------------------|----------------------|----------------------|-----------------------|-----------------------|-----------------------------|----------------------|-----------------------------|----------------------|-----------------------------|----------------------|
| sub1    | $\kappa$         | 0.325<br>$\pm 0.073$        | 0.358<br>$\pm 0.051$        | <b>0.375</b><br>$\pm 0.075$ | 0.331<br>$\pm 0.058$ | 0.111<br>$\pm 0.049$ | 0.003<br>$\pm 0.035$  | 0.178<br>$\pm 0.048$ | -0.044<br>$\pm 0.055$ | 0.092<br>$\pm 0.070$ | 0.003<br>$\pm 0.006$ | 0.064<br>$\pm 0.040$ | 0.050<br>$\pm 0.038$ | -0.003<br>$\pm 0.006$ | -0.006<br>$\pm 0.008$ | 0.325<br>$\pm 0.095$        | 0.058<br>$\pm 0.027$ | 0.306<br>$\pm 0.026$        | 0.067<br>$\pm 0.018$ | 0.397<br>$\pm 0.092$        | 0.025<br>$\pm 0.025$ |
|         | AUC              | 0.792<br>$\pm 0.017$        | 0.811<br>$\pm 0.011$        | 0.790<br>$\pm 0.032$        | 0.789<br>$\pm 0.019$ | 0.577<br>$\pm 0.026$ | 0.545<br>$\pm 0.033$  | 0.675<br>$\pm 0.034$ | 0.512<br>$\pm 0.080$  | 0.595<br>$\pm 0.030$ | 0.496<br>$\pm 0.015$ | 0.554<br>$\pm 0.025$ | 0.553<br>$\pm 0.031$ | 0.494<br>$\pm 0.033$  | 0.498<br>$\pm 0.024$  | 0.780<br>$\pm 0.045$        | 0.559<br>$\pm 0.023$ | 0.762<br>$\pm 0.031$        | 0.546<br>$\pm 0.027$ | <b>0.803</b><br>$\pm 0.041$ | 0.562<br>$\pm 0.018$ |
|         | BAcc             | 0.421<br>$\pm 0.062$        | 0.450<br>$\pm 0.044$        | <b>0.464</b><br>$\pm 0.065$ | 0.426<br>$\pm 0.050$ | 0.238<br>$\pm 0.042$ | 0.145<br>$\pm 0.030$  | 0.295<br>$\pm 0.041$ | 0.105<br>$\pm 0.047$  | 0.221<br>$\pm 0.060$ | 0.145<br>$\pm 0.005$ | 0.198<br>$\pm 0.034$ | 0.186<br>$\pm 0.032$ | 0.140<br>$\pm 0.005$  | 0.138<br>$\pm 0.007$  | 0.421<br>$\pm 0.081$        | 0.193<br>$\pm 0.023$ | 0.405<br>$\pm 0.022$        | 0.200<br>$\pm 0.016$ | 0.483<br>$\pm 0.079$        | 0.164<br>$\pm 0.021$ |
|         | Acc <sub>1</sub> | 0.421<br>$\pm 0.062$        | 0.450<br>$\pm 0.044$        | <b>0.464</b><br>$\pm 0.065$ | 0.426<br>$\pm 0.050$ | 0.238<br>$\pm 0.042$ | 0.145<br>$\pm 0.030$  | 0.295<br>$\pm 0.041$ | 0.105<br>$\pm 0.047$  | 0.224<br>$\pm 0.061$ | 0.145<br>$\pm 0.005$ | 0.202<br>$\pm 0.031$ | 0.186<br>$\pm 0.033$ | 0.143<br>$\pm 0.008$  | 0.140<br>$\pm 0.005$  | 0.421<br>$\pm 0.081$        | 0.193<br>$\pm 0.023$ | 0.405<br>$\pm 0.022$        | 0.200<br>$\pm 0.016$ | 0.485<br>$\pm 0.072$        | 0.170<br>$\pm 0.016$ |
|         | Acc <sub>2</sub> | <b>0.655</b><br>$\pm 0.047$ | <b>0.655</b><br>$\pm 0.022$ | 0.631<br>$\pm 0.045$        | 0.624<br>$\pm 0.056$ | 0.393<br>$\pm 0.015$ | 0.300<br>$\pm 0.033$  | 0.500<br>$\pm 0.057$ | 0.274<br>$\pm 0.098$  | 0.419<br>$\pm 0.037$ | 0.290<br>$\pm 0.007$ | 0.345<br>$\pm 0.030$ | 0.345<br>$\pm 0.025$ | 0.283<br>$\pm 0.005$  | 0.286<br>$\pm 0.008$  | 0.652<br>$\pm 0.078$        | 0.348<br>$\pm 0.051$ | 0.636<br>$\pm 0.056$        | 0.324<br>$\pm 0.021$ | 0.706<br>$\pm 0.053$        | 0.336<br>$\pm 0.035$ |
| sub10   | $\kappa$         | 0.361<br>$\pm 0.069$        | 0.375<br>$\pm 0.056$        | <b>0.425</b><br>$\pm 0.045$ | 0.403<br>$\pm 0.051$ | 0.047<br>$\pm 0.016$ | 0.083<br>$\pm 0.066$  | 0.289<br>$\pm 0.039$ | 0.133<br>$\pm 0.049$  | 0.125<br>$\pm 0.043$ | 0.000<br>$\pm 0.000$ | 0.078<br>$\pm 0.061$ | 0.081<br>$\pm 0.052$ | 0.039<br>$\pm 0.057$  | 0.008<br>$\pm 0.052$  | 0.389<br>$\pm 0.040$        | 0.031<br>$\pm 0.027$ | 0.411<br>$\pm 0.042$        | 0.053<br>$\pm 0.073$ | 0.436<br>$\pm 0.078$        | 0.044<br>$\pm 0.060$ |
|         | AUC              | 0.822<br>$\pm 0.036$        | 0.854<br>$\pm 0.023$        | 0.835<br>$\pm 0.018$        | 0.837<br>$\pm 0.028$ | 0.559<br>$\pm 0.028$ | 0.550<br>$\pm 0.035$  | 0.752<br>$\pm 0.024$ | 0.608<br>$\pm 0.042$  | 0.620<br>$\pm 0.036$ | 0.501<br>$\pm 0.009$ | 0.592<br>$\pm 0.040$ | 0.589<br>$\pm 0.054$ | 0.537<br>$\pm 0.048$  | 0.487<br>$\pm 0.024$  | 0.804<br>$\pm 0.007$        | 0.566<br>$\pm 0.030$ | 0.814<br>$\pm 0.036$        | 0.575<br>$\pm 0.024$ | <b>0.846</b><br>$\pm 0.017$ | 0.591<br>$\pm 0.023$ |
|         | BAcc             | 0.452<br>$\pm 0.059$        | 0.464<br>$\pm 0.048$        | <b>0.507</b><br>$\pm 0.038$ | 0.488<br>$\pm 0.044$ | 0.183<br>$\pm 0.014$ | 0.214<br>$\pm 0.056$  | 0.390<br>$\pm 0.033$ | 0.257<br>$\pm 0.042$  | 0.250<br>$\pm 0.037$ | 0.143<br>$\pm 0.000$ | 0.210<br>$\pm 0.052$ | 0.212<br>$\pm 0.045$ | 0.176<br>$\pm 0.049$  | 0.150<br>$\pm 0.044$  | 0.476<br>$\pm 0.035$        | 0.169<br>$\pm 0.023$ | 0.495<br>$\pm 0.036$        | 0.188<br>$\pm 0.063$ | 0.517<br>$\pm 0.067$        | 0.181<br>$\pm 0.051$ |
|         | Acc <sub>1</sub> | 0.450<br>$\pm 0.061$        | 0.464<br>$\pm 0.048$        | <b>0.507</b><br>$\pm 0.038$ | 0.488<br>$\pm 0.044$ | 0.183<br>$\pm 0.014$ | 0.214<br>$\pm 0.056$  | 0.390<br>$\pm 0.033$ | 0.257<br>$\pm 0.042$  | 0.250<br>$\pm 0.037$ | 0.143<br>$\pm 0.000$ | 0.212<br>$\pm 0.058$ | 0.215<br>$\pm 0.044$ | 0.181<br>$\pm 0.046$  | 0.150<br>$\pm 0.044$  | 0.476<br>$\pm 0.035$        | 0.169<br>$\pm 0.023$ | 0.495<br>$\pm 0.036$        | 0.188<br>$\pm 0.063$ | 0.522<br>$\pm 0.063$        | 0.181<br>$\pm 0.051$ |
|         | Acc <sub>2</sub> | 0.693<br>$\pm 0.055$        | 0.717<br>$\pm 0.023$        | 0.721<br>$\pm 0.032$        | 0.698<br>$\pm 0.036$ | 0.350<br>$\pm 0.054$ | 0.355<br>$\pm 0.053$  | 0.586<br>$\pm 0.080$ | 0.400<br>$\pm 0.063$  | 0.445<br>$\pm 0.056$ | 0.286<br>$\pm 0.000$ | 0.382<br>$\pm 0.091$ | 0.393<br>$\pm 0.069$ | 0.321<br>$\pm 0.055$  | 0.276<br>$\pm 0.031$  | 0.702<br>$\pm 0.024$        | 0.317<br>$\pm 0.014$ | <b>0.724</b><br>$\pm 0.043$ | 0.329<br>$\pm 0.052$ | 0.751<br>$\pm 0.033$        | 0.350<br>$\pm 0.057$ |
| sub11   | $\kappa$         | 0.236<br>$\pm 0.056$        | 0.269<br>$\pm 0.042$        | 0.250<br>$\pm 0.033$        | 0.269<br>$\pm 0.066$ | 0.094<br>$\pm 0.049$ | -0.011<br>$\pm 0.060$ | 0.169<br>$\pm 0.070$ | 0.019<br>$\pm 0.023$  | 0.103<br>$\pm 0.080$ | 0.000<br>$\pm 0.000$ | 0.028<br>$\pm 0.035$ | 0.031<br>$\pm 0.027$ | -0.006<br>$\pm 0.008$ | -0.011<br>$\pm 0.023$ | <b>0.331</b><br>$\pm 0.069$ | 0.056<br>$\pm 0.053$ | 0.317<br>$\pm 0.065$        | 0.103<br>$\pm 0.035$ | 0.364<br>$\pm 0.054$        | 0.097<br>$\pm 0.050$ |
|         | AUC              | 0.740<br>$\pm 0.036$        | <b>0.770</b><br>$\pm 0.033$ | 0.731<br>$\pm 0.032$        | 0.747<br>$\pm 0.037$ | 0.573<br>$\pm 0.043$ | 0.513<br>$\pm 0.017$  | 0.656<br>$\pm 0.033$ | 0.522<br>$\pm 0.027$  | 0.592<br>$\pm 0.057$ | 0.500<br>$\pm 0.000$ | 0.543<br>$\pm 0.029$ | 0.550<br>$\pm 0.038$ | 0.487<br>$\pm 0.012$  | 0.482<br>$\pm 0.013$  | 0.764<br>$\pm 0.029$        | 0.577<br>$\pm 0.036$ | 0.745<br>$\pm 0.019$        | 0.607<br>$\pm 0.033$ | 0.782<br>$\pm 0.027$        | 0.600<br>$\pm 0.044$ |
|         | BAcc             | 0.345<br>$\pm 0.048$        | 0.374<br>$\pm 0.036$        | 0.357<br>$\pm 0.028$        | 0.374<br>$\pm 0.057$ | 0.224<br>$\pm 0.042$ | 0.133<br>$\pm 0.051$  | 0.288<br>$\pm 0.060$ | 0.160<br>$\pm 0.020$  | 0.231<br>$\pm 0.069$ | 0.143<br>$\pm 0.000$ | 0.167<br>$\pm 0.030$ | 0.169<br>$\pm 0.023$ | 0.138<br>$\pm 0.007$  | 0.133<br>$\pm 0.020$  | <b>0.426</b><br>$\pm 0.059$ | 0.190<br>$\pm 0.045$ | 0.414<br>$\pm 0.056$        | 0.231<br>$\pm 0.030$ | 0.455<br>$\pm 0.046$        | 0.226<br>$\pm 0.043$ |
|         | Acc <sub>1</sub> | 0.345<br>$\pm 0.048$        | 0.374<br>$\pm 0.036$        | 0.357<br>$\pm 0.028$        | 0.374<br>$\pm 0.057$ | 0.224<br>$\pm 0.042$ | 0.133<br>$\pm 0.051$  | 0.288<br>$\pm 0.060$ | 0.160<br>$\pm 0.020$  | 0.231<br>$\pm 0.069$ | 0.143<br>$\pm 0.000$ | 0.165<br>$\pm 0.031$ | 0.173<br>$\pm 0.029$ | 0.129<br>$\pm 0.020$  | 0.133<br>$\pm 0.020$  | <b>0.426</b><br>$\pm 0.059$ | 0.190<br>$\pm 0.045$ | 0.419<br>$\pm 0.057$        | 0.231<br>$\pm 0.030$ | 0.448<br>$\pm 0.045$        | 0.228<br>$\pm 0.043$ |
|         | Acc <sub>2</sub> | 0.557<br>$\pm 0.070$        | <b>0.638</b><br>$\pm 0.054$ | 0.531<br>$\pm 0.045$        | 0.576<br>$\pm 0.053$ | 0.360<br>$\pm 0.046$ | 0.288<br>$\pm 0.050$  | 0.474<br>$\pm 0.067$ | 0.293<br>$\pm 0.023$  | 0.381<br>$\pm 0.066$ | 0.286<br>$\pm 0.000$ | 0.314<br>$\pm 0.037$ | 0.328<br>$\pm 0.053$ | 0.271<br>$\pm 0.026$  | 0.271<br>$\pm 0.016$  | 0.626<br>$\pm 0.048$        | 0.357<br>$\pm 0.025$ | 0.619<br>$\pm 0.065$        | 0.367<br>$\pm 0.023$ | 0.656<br>$\pm 0.071$        | 0.380<br>$\pm 0.059$ |

Continued on next page

| SubjectMetric |          | DeepConvnet          | EEGNet                      | Conformer                   | CTNet                | BIOT (f)             | BIOT (l)              | BENDR (f)            | BENDR (l)            | CBraMod (f)          | CBraMod (l)          | EEGPT (f)            | EEGPT (l)            | LaBraM (f)            | LaBraM (l)            | STEEGformer-s (f)           | STEEGformer-s (l)    | STEEGformer-b (f)           | STEEGformer-b (l)    | STEEGformer-l (f)           | STEEGformer-l (l)    |
|---------------|----------|----------------------|-----------------------------|-----------------------------|----------------------|----------------------|-----------------------|----------------------|----------------------|----------------------|----------------------|----------------------|----------------------|-----------------------|-----------------------|-----------------------------|----------------------|-----------------------------|----------------------|-----------------------------|----------------------|
| sub12         | $\kappa$ | 0.219<br>$\pm 0.083$ | 0.253<br>$\pm 0.067$        | 0.239<br>$\pm 0.027$        | 0.258<br>$\pm 0.061$ | 0.075<br>$\pm 0.025$ | 0.022<br>$\pm 0.046$  | 0.181<br>$\pm 0.035$ | 0.050<br>$\pm 0.042$ | 0.086<br>$\pm 0.054$ | 0.000<br>$\pm 0.000$ | 0.058<br>$\pm 0.027$ | 0.044<br>$\pm 0.032$ | -0.011<br>$\pm 0.033$ | 0.008<br>$\pm 0.023$  | 0.339<br>$\pm 0.049$        | 0.097<br>$\pm 0.033$ | 0.314<br>$\pm 0.065$        | 0.125<br>$\pm 0.037$ | <b>0.328</b><br>$\pm 0.072$ | 0.097<br>$\pm 0.052$ |
|               | AUC      | 0.741<br>$\pm 0.026$ | 0.740<br>$\pm 0.027$        | 0.725<br>$\pm 0.044$        | 0.744<br>$\pm 0.028$ | 0.561<br>$\pm 0.031$ | 0.536<br>$\pm 0.033$  | 0.656<br>$\pm 0.021$ | 0.551<br>$\pm 0.032$ | 0.599<br>$\pm 0.079$ | 0.498<br>$\pm 0.003$ | 0.566<br>$\pm 0.015$ | 0.547<br>$\pm 0.046$ | 0.479<br>$\pm 0.056$  | 0.476<br>$\pm 0.025$  | 0.743<br>$\pm 0.013$        | 0.601<br>$\pm 0.020$ | 0.763<br>$\pm 0.031$        | 0.615<br>$\pm 0.024$ | <b>0.760</b><br>$\pm 0.048$ | 0.617<br>$\pm 0.040$ |
|               | BACc     | 0.331<br>$\pm 0.071$ | 0.360<br>$\pm 0.057$        | 0.348<br>$\pm 0.023$        | 0.364<br>$\pm 0.052$ | 0.207<br>$\pm 0.022$ | 0.162<br>$\pm 0.039$  | 0.298<br>$\pm 0.030$ | 0.186<br>$\pm 0.036$ | 0.217<br>$\pm 0.046$ | 0.143<br>$\pm 0.000$ | 0.193<br>$\pm 0.023$ | 0.181<br>$\pm 0.027$ | 0.133<br>$\pm 0.028$  | 0.150<br>$\pm 0.020$  | 0.433<br>$\pm 0.042$        | 0.226<br>$\pm 0.028$ | 0.412<br>$\pm 0.056$        | 0.250<br>$\pm 0.031$ | <b>0.424</b><br>$\pm 0.062$ | 0.226<br>$\pm 0.045$ |
|               | Acc_1    | 0.331<br>$\pm 0.071$ | 0.360<br>$\pm 0.057$        | 0.348<br>$\pm 0.023$        | 0.364<br>$\pm 0.052$ | 0.207<br>$\pm 0.022$ | 0.162<br>$\pm 0.039$  | 0.298<br>$\pm 0.030$ | 0.186<br>$\pm 0.036$ | 0.217<br>$\pm 0.046$ | 0.143<br>$\pm 0.000$ | 0.200<br>$\pm 0.030$ | 0.181<br>$\pm 0.022$ | 0.132<br>$\pm 0.024$  | 0.150<br>$\pm 0.020$  | 0.433<br>$\pm 0.042$        | 0.229<br>$\pm 0.030$ | 0.410<br>$\pm 0.066$        | 0.250<br>$\pm 0.031$ | <b>0.421</b><br>$\pm 0.070$ | 0.230<br>$\pm 0.050$ |
|               | Acc_2    | 0.576<br>$\pm 0.089$ | 0.576<br>$\pm 0.064$        | 0.543<br>$\pm 0.055$        | 0.598<br>$\pm 0.060$ | 0.357<br>$\pm 0.044$ | 0.314<br>$\pm 0.060$  | 0.476<br>$\pm 0.028$ | 0.360<br>$\pm 0.042$ | 0.390<br>$\pm 0.088$ | 0.286<br>$\pm 0.000$ | 0.352<br>$\pm 0.042$ | 0.305<br>$\pm 0.044$ | 0.275<br>$\pm 0.062$  | 0.238<br>$\pm 0.048$  | 0.602<br>$\pm 0.020$        | 0.405<br>$\pm 0.038$ | <b>0.612</b><br>$\pm 0.052$ | 0.417<br>$\pm 0.040$ | 0.615<br>$\pm 0.063$        | 0.432<br>$\pm 0.045$ |
| sub13         | $\kappa$ | 0.278<br>$\pm 0.061$ | 0.297<br>$\pm 0.085$        | 0.289<br>$\pm 0.055$        | 0.294<br>$\pm 0.067$ | 0.028<br>$\pm 0.035$ | -0.003<br>$\pm 0.036$ | 0.203<br>$\pm 0.040$ | 0.042<br>$\pm 0.058$ | 0.031<br>$\pm 0.032$ | 0.000<br>$\pm 0.000$ | 0.031<br>$\pm 0.089$ | 0.025<br>$\pm 0.051$ | -0.033<br>$\pm 0.040$ | -0.017<br>$\pm 0.045$ | <b>0.314</b><br>$\pm 0.047$ | 0.031<br>$\pm 0.030$ | 0.303<br>$\pm 0.081$        | 0.017<br>$\pm 0.042$ | 0.322<br>$\pm 0.030$        | 0.011<br>$\pm 0.027$ |
|               | AUC      | 0.768<br>$\pm 0.041$ | <b>0.770</b><br>$\pm 0.031$ | 0.766<br>$\pm 0.020$        | 0.755<br>$\pm 0.031$ | 0.538<br>$\pm 0.020$ | 0.471<br>$\pm 0.042$  | 0.702<br>$\pm 0.039$ | 0.550<br>$\pm 0.043$ | 0.542<br>$\pm 0.018$ | 0.501<br>$\pm 0.005$ | 0.568<br>$\pm 0.043$ | 0.548<br>$\pm 0.024$ | 0.476<br>$\pm 0.037$  | 0.445<br>$\pm 0.026$  | 0.742<br>$\pm 0.027$        | 0.532<br>$\pm 0.029$ | 0.758<br>$\pm 0.048$        | 0.526<br>$\pm 0.027$ | 0.782<br>$\pm 0.020$        | 0.547<br>$\pm 0.047$ |
|               | BACc     | 0.381<br>$\pm 0.053$ | 0.398<br>$\pm 0.073$        | 0.390<br>$\pm 0.047$        | 0.395<br>$\pm 0.057$ | 0.167<br>$\pm 0.030$ | 0.140<br>$\pm 0.031$  | 0.317<br>$\pm 0.034$ | 0.179<br>$\pm 0.050$ | 0.169<br>$\pm 0.027$ | 0.143<br>$\pm 0.000$ | 0.169<br>$\pm 0.076$ | 0.164<br>$\pm 0.044$ | 0.114<br>$\pm 0.034$  | 0.129<br>$\pm 0.039$  | <b>0.412</b><br>$\pm 0.040$ | 0.169<br>$\pm 0.026$ | 0.402<br>$\pm 0.069$        | 0.157<br>$\pm 0.036$ | 0.419<br>$\pm 0.026$        | 0.152<br>$\pm 0.023$ |
|               | Acc_1    | 0.381<br>$\pm 0.053$ | 0.398<br>$\pm 0.073$        | 0.390<br>$\pm 0.047$        | 0.395<br>$\pm 0.057$ | 0.166<br>$\pm 0.026$ | 0.140<br>$\pm 0.031$  | 0.317<br>$\pm 0.034$ | 0.179<br>$\pm 0.050$ | 0.165<br>$\pm 0.030$ | 0.143<br>$\pm 0.000$ | 0.163<br>$\pm 0.069$ | 0.157<br>$\pm 0.041$ | 0.111<br>$\pm 0.033$  | 0.129<br>$\pm 0.039$  | <b>0.412</b><br>$\pm 0.040$ | 0.169<br>$\pm 0.026$ | 0.398<br>$\pm 0.064$        | 0.157<br>$\pm 0.036$ | 0.425<br>$\pm 0.030$        | 0.158<br>$\pm 0.028$ |
|               | Acc_2    | 0.598<br>$\pm 0.054$ | 0.605<br>$\pm 0.039$        | <b>0.633</b><br>$\pm 0.035$ | 0.602<br>$\pm 0.057$ | 0.343<br>$\pm 0.040$ | 0.276<br>$\pm 0.053$  | 0.507<br>$\pm 0.054$ | 0.333<br>$\pm 0.038$ | 0.324<br>$\pm 0.054$ | 0.286<br>$\pm 0.000$ | 0.362<br>$\pm 0.056$ | 0.322<br>$\pm 0.056$ | 0.242<br>$\pm 0.046$  | 0.245<br>$\pm 0.029$  | 0.607<br>$\pm 0.072$        | 0.321<br>$\pm 0.042$ | 0.623<br>$\pm 0.086$        | 0.298<br>$\pm 0.012$ | 0.677<br>$\pm 0.034$        | 0.322<br>$\pm 0.046$ |
| sub14         | $\kappa$ | 0.342<br>$\pm 0.053$ | 0.325<br>$\pm 0.038$        | 0.378<br>$\pm 0.078$        | 0.317<br>$\pm 0.050$ | 0.117<br>$\pm 0.053$ | 0.003<br>$\pm 0.025$  | 0.211<br>$\pm 0.012$ | 0.078<br>$\pm 0.033$ | 0.050<br>$\pm 0.073$ | 0.000<br>$\pm 0.000$ | 0.061<br>$\pm 0.049$ | 0.025<br>$\pm 0.049$ | 0.036<br>$\pm 0.073$  | -0.028<br>$\pm 0.026$ | 0.333<br>$\pm 0.022$        | 0.067<br>$\pm 0.058$ | <b>0.350</b><br>$\pm 0.051$ | 0.100<br>$\pm 0.057$ | 0.331<br>$\pm 0.081$        | 0.053<br>$\pm 0.037$ |
|               | AUC      | 0.780<br>$\pm 0.010$ | 0.803<br>$\pm 0.026$        | <b>0.790</b><br>$\pm 0.032$ | 0.788<br>$\pm 0.017$ | 0.589<br>$\pm 0.051$ | 0.521<br>$\pm 0.063$  | 0.711<br>$\pm 0.024$ | 0.563<br>$\pm 0.033$ | 0.593<br>$\pm 0.046$ | 0.500<br>$\pm 0.000$ | 0.573<br>$\pm 0.033$ | 0.562<br>$\pm 0.038$ | 0.537<br>$\pm 0.061$  | 0.439<br>$\pm 0.033$  | 0.766<br>$\pm 0.033$        | 0.580<br>$\pm 0.044$ | 0.757<br>$\pm 0.028$        | 0.584<br>$\pm 0.040$ | 0.773<br>$\pm 0.035$        | 0.587<br>$\pm 0.036$ |
|               | BACc     | 0.436<br>$\pm 0.045$ | 0.421<br>$\pm 0.032$        | 0.467<br>$\pm 0.067$        | 0.414<br>$\pm 0.043$ | 0.243<br>$\pm 0.045$ | 0.145<br>$\pm 0.021$  | 0.324<br>$\pm 0.010$ | 0.210<br>$\pm 0.029$ | 0.186<br>$\pm 0.063$ | 0.143<br>$\pm 0.000$ | 0.195<br>$\pm 0.042$ | 0.164<br>$\pm 0.042$ | 0.174<br>$\pm 0.063$  | 0.119<br>$\pm 0.022$  | 0.429<br>$\pm 0.019$        | 0.200<br>$\pm 0.050$ | <b>0.443</b><br>$\pm 0.044$ | 0.229<br>$\pm 0.049$ | 0.426<br>$\pm 0.069$        | 0.188<br>$\pm 0.032$ |
|               | Acc_1    | 0.436<br>$\pm 0.045$ | 0.419<br>$\pm 0.027$        | 0.467<br>$\pm 0.067$        | 0.414<br>$\pm 0.043$ | 0.243<br>$\pm 0.045$ | 0.145<br>$\pm 0.021$  | 0.324<br>$\pm 0.010$ | 0.210<br>$\pm 0.029$ | 0.186<br>$\pm 0.063$ | 0.143<br>$\pm 0.000$ | 0.196<br>$\pm 0.046$ | 0.165<br>$\pm 0.042$ | 0.174<br>$\pm 0.063$  | 0.121<br>$\pm 0.018$  | 0.429<br>$\pm 0.019$        | 0.200<br>$\pm 0.050$ | <b>0.443</b><br>$\pm 0.044$ | 0.229<br>$\pm 0.049$ | 0.425<br>$\pm 0.070$        | 0.189<br>$\pm 0.027$ |
|               | Acc_2    | 0.638<br>$\pm 0.027$ | <b>0.657</b><br>$\pm 0.028$ | 0.657<br>$\pm 0.030$        | 0.624<br>$\pm 0.054$ | 0.383<br>$\pm 0.057$ | 0.283<br>$\pm 0.010$  | 0.517<br>$\pm 0.041$ | 0.369<br>$\pm 0.034$ | 0.369<br>$\pm 0.065$ | 0.286<br>$\pm 0.000$ | 0.353<br>$\pm 0.055$ | 0.360<br>$\pm 0.055$ | 0.312<br>$\pm 0.059$  | 0.269<br>$\pm 0.011$  | 0.652<br>$\pm 0.053$        | 0.343<br>$\pm 0.057$ | 0.617<br>$\pm 0.062$        | 0.367<br>$\pm 0.044$ | 0.660<br>$\pm 0.084$        | 0.340<br>$\pm 0.051$ |
| sub15         | $\kappa$ | 0.250<br>$\pm 0.028$ | 0.247<br>$\pm 0.066$        | 0.289<br>$\pm 0.056$        | 0.247<br>$\pm 0.049$ | 0.100<br>$\pm 0.032$ | 0.058<br>$\pm 0.066$  | 0.208<br>$\pm 0.094$ | 0.047<br>$\pm 0.063$ | 0.114<br>$\pm 0.093$ | 0.000<br>$\pm 0.000$ | 0.056<br>$\pm 0.033$ | 0.092<br>$\pm 0.052$ | 0.050<br>$\pm 0.071$  | 0.019<br>$\pm 0.055$  | <b>0.294</b><br>$\pm 0.089$ | 0.028<br>$\pm 0.033$ | 0.289<br>$\pm 0.084$        | 0.042<br>$\pm 0.054$ | 0.319<br>$\pm 0.049$        | 0.047<br>$\pm 0.057$ |

Continued on next page

| Subject | Metric   | DeepConvnet | EEGNet       | Conformer    | CTNet       | BIOT (f)    | BIOT (l)    | BENDR (f)   | BENDR (l)   | CBraMod (f) | CBraMod (l) | EEGPT (f)   | EEGPT (l)   | LaBraM (f)  | LaBraM (l)  | STEEGformer-s (f) | STEEGformer-s (l) | STEEGformer-b (f) | STEEGformer-b (l) | STEEGformer-h (f) | STEEGformer-h (l) |
|---------|----------|-------------|--------------|--------------|-------------|-------------|-------------|-------------|-------------|-------------|-------------|-------------|-------------|-------------|-------------|-------------------|-------------------|-------------------|-------------------|-------------------|-------------------|
|         |          |             |              |              |             |             |             |             |             |             |             |             |             |             |             |                   |                   |                   |                   |                   |                   |
| 2385    | AUC      | 0.725       | 0.758        | <b>0.758</b> | 0.747       | 0.601       | 0.553       | 0.687       | 0.552       | 0.615       | 0.500       | 0.564       | 0.598       | 0.549       | 0.490       | 0.744             | 0.554             | 0.741             | 0.559             | 0.758             | 0.571             |
|         |          | $\pm 0.012$ | $\pm 0.037$  | $\pm 0.021$  | $\pm 0.020$ | $\pm 0.017$ | $\pm 0.027$ | $\pm 0.039$ | $\pm 0.041$ | $\pm 0.047$ | $\pm 0.003$ | $\pm 0.044$ | $\pm 0.033$ | $\pm 0.073$ | $\pm 0.037$ | $\pm 0.046$       | $\pm 0.041$       | $\pm 0.066$       | $\pm 0.037$       | $\pm 0.041$       | $\pm 0.043$       |
|         |          | 0.357       | 0.355        | 0.390        | 0.355       | 0.229       | 0.193       | 0.321       | 0.183       | 0.240       | 0.143       | 0.190       | 0.221       | 0.186       | 0.160       | <b>0.395</b>      | 0.167             | 0.390             | 0.179             | 0.417             | 0.183             |
|         |          | $\pm 0.024$ | $\pm 0.057$  | $\pm 0.048$  | $\pm 0.042$ | $\pm 0.027$ | $\pm 0.057$ | $\pm 0.080$ | $\pm 0.054$ | $\pm 0.080$ | $\pm 0.000$ | $\pm 0.028$ | $\pm 0.044$ | $\pm 0.061$ | $\pm 0.047$ | $\pm 0.076$       | $\pm 0.028$       | $\pm 0.072$       | $\pm 0.046$       | $\pm 0.042$       | $\pm 0.049$       |
|         | BAcc     | 0.355       | 0.357        | 0.390        | 0.355       | 0.229       | 0.193       | 0.321       | 0.183       | 0.240       | 0.143       | 0.203       | 0.227       | 0.186       | 0.157       | <b>0.395</b>      | 0.167             | 0.390             | 0.179             | 0.430             | 0.183             |
|         |          | $\pm 0.027$ | $\pm 0.060$  | $\pm 0.048$  | $\pm 0.042$ | $\pm 0.027$ | $\pm 0.057$ | $\pm 0.080$ | $\pm 0.054$ | $\pm 0.080$ | $\pm 0.000$ | $\pm 0.028$ | $\pm 0.051$ | $\pm 0.061$ | $\pm 0.042$ | $\pm 0.076$       | $\pm 0.030$       | $\pm 0.072$       | $\pm 0.046$       | $\pm 0.047$       | $\pm 0.049$       |
|         |          | 0.560       | <b>0.619</b> | <b>0.619</b> | 0.588       | 0.379       | 0.312       | 0.521       | 0.324       | 0.419       | 0.286       | 0.380       | 0.399       | 0.336       | 0.293       | 0.583             | 0.321             | 0.598             | 0.326             | 0.664             | 0.350             |
|         |          | $\pm 0.033$ | $\pm 0.066$  | $\pm 0.033$  | $\pm 0.038$ | $\pm 0.024$ | $\pm 0.065$ | $\pm 0.075$ | $\pm 0.074$ | $\pm 0.080$ | $\pm 0.000$ | $\pm 0.079$ | $\pm 0.044$ | $\pm 0.069$ | $\pm 0.044$ | $\pm 0.073$       | $\pm 0.062$       | $\pm 0.090$       | $\pm 0.049$       | $\pm 0.075$       | $\pm 0.043$       |
| 2386    | $\kappa$ | 0.261       | <b>0.325</b> | 0.219        | 0.308       | 0.114       | 0.003       | 0.142       | 0.036       | 0.044       | 0.000       | 0.069       | 0.092       | 0.003       | 0.003       | 0.267             | 0.053             | 0.286             | 0.081             | 0.353             | 0.064             |
|         |          | $\pm 0.037$ | $\pm 0.049$  | $\pm 0.006$  | $\pm 0.039$ | $\pm 0.042$ | $\pm 0.039$ | $\pm 0.045$ | $\pm 0.046$ | $\pm 0.077$ | $\pm 0.000$ | $\pm 0.064$ | $\pm 0.046$ | $\pm 0.048$ | $\pm 0.039$ | $\pm 0.073$       | $\pm 0.057$       | $\pm 0.045$       | $\pm 0.033$       | $\pm 0.045$       | $\pm 0.053$       |
|         |          | 0.730       | <b>0.755</b> | 0.714        | 0.745       | 0.603       | 0.571       | 0.637       | 0.565       | 0.563       | 0.499       | 0.562       | 0.569       | 0.508       | 0.488       | 0.719             | 0.568             | 0.752             | 0.584             | 0.785             | 0.595             |
|         |          | $\pm 0.013$ | $\pm 0.020$  | $\pm 0.028$  | $\pm 0.018$ | $\pm 0.051$ | $\pm 0.036$ | $\pm 0.039$ | $\pm 0.024$ | $\pm 0.058$ | $\pm 0.003$ | $\pm 0.029$ | $\pm 0.028$ | $\pm 0.050$ | $\pm 0.052$ | $\pm 0.046$       | $\pm 0.039$       | $\pm 0.040$       | $\pm 0.043$       | $\pm 0.032$       | $\pm 0.043$       |
|         | BAcc     | 0.367       | <b>0.421</b> | 0.331        | 0.407       | 0.240       | 0.145       | 0.264       | 0.174       | 0.181       | 0.143       | 0.202       | 0.221       | 0.145       | 0.145       | 0.371             | 0.188             | 0.388             | 0.212             | 0.445             | 0.198             |
|         |          | $\pm 0.032$ | $\pm 0.042$  | $\pm 0.005$  | $\pm 0.033$ | $\pm 0.036$ | $\pm 0.033$ | $\pm 0.039$ | $\pm 0.039$ | $\pm 0.066$ | $\pm 0.000$ | $\pm 0.055$ | $\pm 0.039$ | $\pm 0.041$ | $\pm 0.033$ | $\pm 0.063$       | $\pm 0.049$       | $\pm 0.038$       | $\pm 0.028$       | $\pm 0.038$       | $\pm 0.046$       |
|         |          | 0.367       | <b>0.421</b> | 0.331        | 0.407       | 0.240       | 0.145       | 0.264       | 0.174       | 0.181       | 0.143       | 0.206       | 0.220       | 0.143       | 0.145       | 0.371             | 0.188             | 0.388             | 0.212             | 0.441             | 0.198             |
|         |          | $\pm 0.032$ | $\pm 0.042$  | $\pm 0.005$  | $\pm 0.033$ | $\pm 0.036$ | $\pm 0.033$ | $\pm 0.039$ | $\pm 0.039$ | $\pm 0.066$ | $\pm 0.000$ | $\pm 0.056$ | $\pm 0.043$ | $\pm 0.039$ | $\pm 0.033$ | $\pm 0.063$       | $\pm 0.049$       | $\pm 0.038$       | $\pm 0.028$       | $\pm 0.040$       | $\pm 0.046$       |
| 2387    | BAcc     | 0.550       | 0.602        | 0.543        | 0.576       | 0.402       | 0.288       | 0.445       | 0.326       | 0.343       | 0.286       | 0.364       | 0.378       | 0.288       | 0.281       | 0.586             | 0.345             | <b>0.614</b>      | 0.350             | 0.659             | 0.388             |
|         |          | $\pm 0.039$ | $\pm 0.036$  | $\pm 0.045$  | $\pm 0.018$ | $\pm 0.082$ | $\pm 0.071$ | $\pm 0.077$ | $\pm 0.035$ | $\pm 0.055$ | $\pm 0.000$ | $\pm 0.030$ | $\pm 0.083$ | $\pm 0.042$ | $\pm 0.051$ | $\pm 0.067$       | $\pm 0.022$       | $\pm 0.081$       | $\pm 0.055$       | $\pm 0.073$       | $\pm 0.050$       |
|         |          | 0.711       | 0.756        | 0.678        | 0.767       | 0.083       | 0.089       | 0.367       | 0.081       | 0.378       | 0.000       | 0.183       | 0.467       | 0.000       | -0.019      | <b>0.894</b>      | 0.206             | 0.881             | 0.306             | 0.933             | 0.208             |
|         |          | $\pm 0.041$ | $\pm 0.040$  | $\pm 0.072$  | $\pm 0.068$ | $\pm 0.043$ | $\pm 0.046$ | $\pm 0.069$ | $\pm 0.060$ | $\pm 0.077$ | $\pm 0.000$ | $\pm 0.133$ | $\pm 0.081$ | $\pm 0.000$ | $\pm 0.023$ | $\pm 0.023$       | $\pm 0.039$       | $\pm 0.019$       | $\pm 0.042$       | $\pm 0.012$       | $\pm 0.056$       |
|         | AUC      | 0.952       | 0.956        | 0.947        | 0.962       | 0.589       | 0.599       | 0.786       | 0.577       | 0.813       | 0.501       | 0.658       | 0.832       | 0.500       | 0.496       | <b>0.989</b>      | 0.748             | 0.985             | 0.797             | 0.995             | 0.760             |
|         |          | $\pm 0.002$ | $\pm 0.010$  | $\pm 0.014$  | $\pm 0.016$ | $\pm 0.035$ | $\pm 0.029$ | $\pm 0.040$ | $\pm 0.028$ | $\pm 0.026$ | $\pm 0.006$ | $\pm 0.084$ | $\pm 0.032$ | $\pm 0.001$ | $\pm 0.030$ | $\pm 0.005$       | $\pm 0.029$       | $\pm 0.005$       | $\pm 0.036$       | $\pm 0.003$       | $\pm 0.032$       |
|         |          | 0.752       | 0.790        | 0.724        | 0.800       | 0.214       | 0.219       | 0.457       | 0.212       | 0.467       | 0.143       | 0.300       | 0.543       | 0.143       | 0.126       | <b>0.910</b>      | 0.319             | 0.898             | 0.405             | 0.943             | 0.321             |
|         |          | $\pm 0.035$ | $\pm 0.034$  | $\pm 0.062$  | $\pm 0.059$ | $\pm 0.037$ | $\pm 0.039$ | $\pm 0.059$ | $\pm 0.051$ | $\pm 0.066$ | $\pm 0.000$ | $\pm 0.114$ | $\pm 0.069$ | $\pm 0.000$ | $\pm 0.020$ | $\pm 0.020$       | $\pm 0.033$       | $\pm 0.016$       | $\pm 0.036$       | $\pm 0.010$       | $\pm 0.048$       |
| 2388    | BAcc     | 0.752       | 0.790        | 0.724        | 0.800       | 0.214       | 0.212       | 0.457       | 0.212       | 0.455       | 0.143       | 0.297       | 0.550       | 0.149       | 0.124       | <b>0.910</b>      | 0.319             | 0.898             | 0.405             | 0.940             | 0.319             |
|         |          | $\pm 0.035$ | $\pm 0.034$  | $\pm 0.062$  | $\pm 0.059$ | $\pm 0.025$ | $\pm 0.041$ | $\pm 0.059$ | $\pm 0.051$ | $\pm 0.060$ | $\pm 0.000$ | $\pm 0.122$ | $\pm 0.075$ | $\pm 0.008$ | $\pm 0.022$ | $\pm 0.020$       | $\pm 0.033$       | $\pm 0.017$       | $\pm 0.036$       | $\pm 0.010$       | $\pm 0.048$       |
|         |          | 0.888       | 0.914        | 0.886        | 0.907       | 0.381       | 0.376       | 0.626       | 0.398       | 0.664       | 0.286       | 0.484       | 0.708       | 0.287       | 0.283       | <b>0.967</b>      | 0.524             | 0.963             | 0.631             | 0.972             | 0.539             |
|         |          | $\pm 0.018$ | $\pm 0.045$  | $\pm 0.042$  | $\pm 0.048$ | $\pm 0.041$ | $\pm 0.025$ | $\pm 0.046$ | $\pm 0.033$ | $\pm 0.053$ | $\pm 0.000$ | $\pm 0.127$ | $\pm 0.057$ | $\pm 0.013$ | $\pm 0.023$ | $\pm 0.023$       | $\pm 0.055$       | $\pm 0.021$       | $\pm 0.064$       | $\pm 0.011$       | $\pm 0.055$       |
|         | AUC      | 0.683       | 0.728        | 0.694        | 0.708       | 0.306       | 0.019       | 0.492       | 0.119       | 0.322       | 0.000       | 0.389       | 0.408       | -0.022      | 0.003       | <b>0.858</b>      | 0.222             | 0.836             | 0.306             | 0.892             | 0.219             |
|         |          | $\pm 0.039$ | $\pm 0.033$  | $\pm 0.064$  | $\pm 0.044$ | $\pm 0.095$ | $\pm 0.042$ | $\pm 0.078$ | $\pm 0.046$ | $\pm 0.186$ | $\pm 0.000$ | $\pm 0.113$ | $\pm 0.038$ | $\pm 0.050$ | $\pm 0.015$ | $\pm 0.012$       | $\pm 0.056$       | $\pm 0.039$       | $\pm 0.067$       | $\pm 0.027$       | $\pm 0.048$       |
|         |          | 0.946       | 0.952        | 0.950        | 0.951       | 0.746       | 0.639       | 0.838       | 0.601       | 0.770       | 0.500       | 0.794       | 0.837       | 0.483       | 0.497       | 0.978             | 0.758             | <b>0.979</b>      | 0.794             | 0.985             | 0.748             |
|         |          | $\pm 0.012$ | $\pm 0.011$  | $\pm 0.022$  | $\pm 0.006$ | $\pm 0.076$ | $\pm 0.039$ | $\pm 0.032$ | $\pm 0.025$ | $\pm 0.153$ | $\pm 0.000$ | $\pm 0.042$ | $\pm 0.015$ | $\pm 0.054$ | $\pm 0.037$ | $\pm 0.009$       | $\pm 0.034$       | $\pm 0.010$       | $\pm 0.033$       | $\pm 0.008$       | $\pm 0.048$       |

Continued on next page



| SubjectMetric |          | DeepConvnet     | EEGNet                         | Conformer       | CTNet                          | BIOT (f)        | BIOT (l)        | BENDR (f)       | BENDR (l)       | CBraMod (f)     | CBraMod (l)     | EEGPT (f)       | EEGPT (l)       | LaBraM (f)       | LaBraM (l)       | STEEGformer-s (f)              | STEEGformer-s (l) | STEEGformer-b (f)              | STEEGformer-b (l) | STEEGformer-h (f)              | STEEGformer-h (l) |
|---------------|----------|-----------------|--------------------------------|-----------------|--------------------------------|-----------------|-----------------|-----------------|-----------------|-----------------|-----------------|-----------------|-----------------|------------------|------------------|--------------------------------|-------------------|--------------------------------|-------------------|--------------------------------|-------------------|
| sub5          | BAcc     | 0.729<br>±0.033 | 0.767<br>±0.029                | 0.738<br>±0.055 | 0.750<br>±0.038                | 0.405<br>±0.082 | 0.160<br>±0.036 | 0.564<br>±0.067 | 0.245<br>±0.039 | 0.419<br>±0.159 | 0.143<br>±0.000 | 0.476<br>±0.097 | 0.493<br>±0.032 | 0.124<br>±0.043  | 0.145<br>±0.013  | <b>0.879</b><br>± <b>0.010</b> | 0.333<br>±0.048   | 0.860<br>±0.033                | 0.405<br>±0.057   | 0.907<br>± 0.023               | 0.331<br>±0.041   |
|               | Acc_1    | 0.729<br>±0.033 | 0.767<br>±0.029                | 0.738<br>±0.055 | 0.748<br>±0.039                | 0.405<br>±0.082 | 0.160<br>±0.036 | 0.564<br>±0.067 | 0.245<br>±0.039 | 0.419<br>±0.159 | 0.143<br>±0.000 | 0.479<br>±0.096 | 0.500<br>±0.032 | 0.124<br>±0.043  | 0.145<br>±0.013  | <b>0.879</b><br>± <b>0.010</b> | 0.333<br>±0.048   | 0.860<br>±0.033                | 0.405<br>±0.057   | 0.912<br>± 0.019               | 0.335<br>±0.044   |
|               | Acc_2    | 0.898<br>±0.020 | 0.902<br>±0.035                | 0.876<br>±0.043 | 0.905<br>±0.028                | 0.579<br>±0.080 | 0.317<br>±0.018 | 0.710<br>±0.052 | 0.400<br>±0.032 | 0.643<br>±0.210 | 0.286<br>±0.000 | 0.636<br>±0.081 | 0.719<br>±0.035 | 0.267<br>±0.057  | 0.267<br>±0.018  | <b>0.964</b><br>± <b>0.022</b> | 0.581<br>±0.047   | 0.962<br>±0.030                | 0.619<br>±0.038   | 0.975<br>± 0.015               | 0.543<br>±0.025   |
|               | $\kappa$ | 0.272<br>±0.012 | 0.253<br>±0.081                | 0.250<br>±0.056 | <b>0.342</b><br>± <b>0.063</b> | 0.033<br>±0.038 | 0.017<br>±0.050 | 0.236<br>±0.038 | 0.053<br>±0.065 | 0.094<br>±0.027 | 0.000<br>±0.000 | 0.056<br>±0.022 | 0.078<br>±0.049 | 0.000<br>±0.000  | -0.006<br>±0.016 | 0.297<br>±0.114                | 0.033<br>±0.025   | 0.333<br>±0.057                | 0.044<br>±0.032   | 0.394<br>± 0.066               | 0.067<br>±0.021   |
|               | AUC      | 0.769<br>±0.022 | 0.773<br>±0.042                | 0.743<br>±0.025 | <b>0.793</b><br>± <b>0.024</b> | 0.519<br>±0.027 | 0.505<br>±0.057 | 0.717<br>±0.037 | 0.572<br>±0.037 | 0.569<br>±0.019 | 0.500<br>±0.000 | 0.583<br>±0.026 | 0.587<br>±0.048 | 0.490<br>±0.023  | 0.474<br>±0.020  | 0.750<br>±0.058                | 0.552<br>±0.038   | 0.753<br>±0.014                | 0.574<br>±0.040   | 0.794<br>± 0.033               | 0.580<br>±0.034   |
|               | BAcc     | 0.376<br>±0.011 | 0.360<br>±0.069                | 0.357<br>±0.048 | <b>0.436</b><br>± <b>0.054</b> | 0.171<br>±0.032 | 0.157<br>±0.043 | 0.345<br>±0.033 | 0.188<br>±0.056 | 0.224<br>±0.023 | 0.143<br>±0.000 | 0.190<br>±0.019 | 0.210<br>±0.042 | 0.143<br>±0.000  | 0.138<br>±0.014  | 0.398<br>±0.098                | 0.171<br>±0.022   | 0.429<br>±0.049                | 0.181<br>±0.027   | 0.481<br>± 0.057               | 0.200<br>±0.018   |
| sub6          | Acc_1    | 0.376<br>±0.011 | 0.357<br>±0.069                | 0.357<br>±0.048 | <b>0.438</b><br>± <b>0.056</b> | 0.170<br>±0.029 | 0.158<br>±0.045 | 0.345<br>±0.033 | 0.188<br>±0.056 | 0.221<br>±0.024 | 0.143<br>±0.000 | 0.190<br>±0.022 | 0.217<br>±0.049 | 0.150<br>±0.008  | 0.138<br>±0.014  | 0.398<br>±0.098                | 0.171<br>±0.022   | 0.424<br>±0.059                | 0.181<br>±0.027   | 0.490<br>± 0.066               | 0.205<br>±0.024   |
|               | Acc_2    | 0.612<br>±0.066 | 0.600<br>±0.091                | 0.588<br>±0.065 | 0.638<br>±0.057                | 0.300<br>±0.043 | 0.314<br>±0.077 | 0.545<br>±0.067 | 0.348<br>±0.066 | 0.367<br>±0.051 | 0.286<br>±0.000 | 0.385<br>±0.028 | 0.402<br>±0.062 | 0.291<br>±0.013  | 0.252<br>±0.043  | 0.621<br>±0.080                | 0.317<br>±0.032   | <b>0.655</b><br>± <b>0.036</b> | 0.329<br>±0.033   | 0.688<br>± 0.053               | 0.407<br>±0.028   |
|               | $\kappa$ | 0.439<br>±0.075 | 0.400<br>±0.096                | 0.397<br>±0.033 | 0.425<br>±0.067                | 0.147<br>±0.046 | 0.075<br>±0.071 | 0.269<br>±0.102 | 0.061<br>±0.076 | 0.172<br>±0.051 | 0.000<br>±0.000 | 0.100<br>±0.043 | 0.122<br>±0.041 | 0.025<br>±0.087  | -0.022<br>±0.045 | <b>0.525</b><br>± <b>0.070</b> | 0.111<br>±0.053   | 0.514<br>±0.022                | 0.161<br>±0.057   | 0.544<br>± 0.043               | 0.117<br>±0.016   |
|               | AUC      | 0.848<br>±0.028 | 0.834<br>±0.019                | 0.807<br>±0.027 | 0.838<br>±0.021                | 0.643<br>±0.019 | 0.580<br>±0.031 | 0.737<br>±0.049 | 0.582<br>±0.036 | 0.675<br>±0.033 | 0.500<br>±0.000 | 0.602<br>±0.034 | 0.597<br>±0.031 | 0.583<br>±0.136  | 0.469<br>±0.037  | 0.858<br>±0.028                | 0.644<br>±0.024   | <b>0.872</b><br>± <b>0.025</b> | 0.655<br>±0.030   | 0.891<br>± 0.025               | 0.654<br>±0.022   |
|               | BAcc     | 0.519<br>±0.064 | 0.486<br>±0.082                | 0.483<br>±0.029 | 0.507<br>±0.057                | 0.269<br>±0.039 | 0.207<br>±0.061 | 0.374<br>±0.087 | 0.195<br>±0.065 | 0.290<br>±0.043 | 0.143<br>±0.000 | 0.229<br>±0.037 | 0.248<br>±0.035 | 0.164<br>±0.075  | 0.124<br>±0.038  | <b>0.593</b><br>± <b>0.060</b> | 0.238<br>±0.045   | 0.583<br>±0.019                | 0.281<br>±0.049   | 0.610<br>± 0.037               | 0.243<br>±0.014   |
|               | Acc_1    | 0.519<br>±0.064 | 0.486<br>±0.082                | 0.483<br>±0.029 | 0.507<br>±0.057                | 0.269<br>±0.039 | 0.207<br>±0.061 | 0.374<br>±0.087 | 0.195<br>±0.065 | 0.293<br>±0.045 | 0.143<br>±0.000 | 0.228<br>±0.046 | 0.258<br>±0.037 | 0.157<br>±0.078  | 0.124<br>±0.038  | <b>0.593</b><br>± <b>0.060</b> | 0.238<br>±0.045   | 0.583<br>±0.019                | 0.279<br>±0.050   | 0.617<br>± 0.035               | 0.240<br>±0.010   |
| sub7          | Acc_2    | 0.740<br>±0.036 | 0.736<br>±0.049                | 0.700<br>±0.054 | 0.714<br>±0.031                | 0.436<br>±0.046 | 0.355<br>±0.050 | 0.555<br>±0.054 | 0.390<br>±0.036 | 0.481<br>±0.022 | 0.286<br>±0.000 | 0.380<br>±0.053 | 0.403<br>±0.059 | 0.326<br>±0.157  | 0.252<br>±0.073  | 0.781<br>±0.022                | 0.398<br>±0.066   | <b>0.802</b><br>± <b>0.051</b> | 0.438<br>±0.054   | 0.838<br>± 0.045               | 0.395<br>±0.027   |
|               | $\kappa$ | 0.278<br>±0.080 | 0.286<br>±0.058                | 0.242<br>±0.051 | 0.322<br>±0.075                | 0.036<br>±0.066 | 0.014<br>±0.039 | 0.136<br>±0.043 | 0.019<br>±0.078 | 0.056<br>±0.049 | 0.000<br>±0.000 | 0.053<br>±0.025 | 0.058<br>±0.051 | -0.003<br>±0.006 | 0.025<br>±0.051  | 0.378<br>± 0.032               | 0.067<br>±0.033   | 0.294<br>±0.037                | 0.092<br>±0.030   | <b>0.375</b><br>± <b>0.055</b> | 0.075<br>±0.051   |
|               | AUC      | 0.765<br>±0.032 | <b>0.775</b><br>± <b>0.035</b> | 0.713<br>±0.061 | 0.763<br>±0.044                | 0.539<br>±0.038 | 0.515<br>±0.016 | 0.665<br>±0.023 | 0.562<br>±0.045 | 0.558<br>±0.047 | 0.496<br>±0.010 | 0.570<br>±0.031 | 0.567<br>±0.018 | 0.501<br>±0.035  | 0.524<br>±0.042  | 0.771<br>±0.027                | 0.589<br>±0.043   | 0.761<br>±0.016                | 0.590<br>±0.049   | 0.790<br>± 0.028               | 0.606<br>±0.060   |
|               | BAcc     | 0.381<br>±0.069 | 0.388<br>±0.050                | 0.350<br>±0.043 | 0.419<br>±0.064                | 0.174<br>±0.057 | 0.155<br>±0.034 | 0.260<br>±0.037 | 0.160<br>±0.067 | 0.190<br>±0.042 | 0.143<br>±0.000 | 0.188<br>±0.021 | 0.193<br>±0.044 | 0.140<br>±0.005  | 0.164<br>±0.044  | 0.467<br>± 0.027               | 0.200<br>±0.028   | 0.395<br>±0.032                | 0.221<br>±0.026   | <b>0.464</b><br>± <b>0.047</b> | 0.207<br>±0.043   |
|               |          |                 |                                |                 |                                |                 |                 |                 |                 |                 |                 |                 |                 |                  |                  |                                |                   |                                |                   |                                |                   |
|               |          |                 |                                |                 |                                |                 |                 |                 |                 |                 |                 |                 |                 |                  |                  |                                |                   |                                |                   |                                |                   |

Continued on next page

| SubjectMetric |          | DeepConvnet      | EEGNet           | Conformer       | CTNet           | BIOT (f)        | BIOT (l)         | BENDR (f)       | BENDR (l)       | CBraMod (f)     | CBraMod (l)      | EEGPT (f)       | EEGPT (l)       | LaBraM (f)      | LaBraM (l)       | STEEGformer-s (f) | STEEGformer-s (l) | STEEGformer-b (f) | STEEGformer-b (l) | STEEGformer-h (f) | STEEGformer-h (l) |
|---------------|----------|------------------|------------------|-----------------|-----------------|-----------------|------------------|-----------------|-----------------|-----------------|------------------|-----------------|-----------------|-----------------|------------------|-------------------|-------------------|-------------------|-------------------|-------------------|-------------------|
|               | Acc.1    | 0.381<br>±0.069  | 0.388<br>±0.050  | 0.350<br>±0.043 | 0.419<br>±0.064 | 0.174<br>±0.057 | 0.155<br>±0.034  | 0.257<br>±0.036 | 0.160<br>±0.067 | 0.190<br>±0.042 | 0.143<br>±0.000  | 0.190<br>±0.022 | 0.194<br>±0.045 | 0.140<br>±0.005 | 0.164<br>±0.044  | 0.467<br>± 0.027  | 0.200<br>±0.028   | 0.395<br>±0.032   | 0.221<br>±0.026   | 0.460<br>± 0.047  | 0.207<br>±0.043   |
|               | Acc.2    | 0.619<br>±0.045  | 0.662<br>± 0.046 | 0.571<br>±0.055 | 0.607<br>±0.090 | 0.314<br>±0.098 | 0.283<br>±0.046  | 0.471<br>±0.042 | 0.364<br>±0.073 | 0.352<br>±0.067 | 0.286<br>±0.000  | 0.381<br>±0.040 | 0.358<br>±0.044 | 0.279<br>±0.016 | 0.302<br>±0.058  | 0.648<br>±0.025   | 0.367<br>±0.070   | 0.621<br>±0.037   | 0.369<br>±0.079   | 0.680<br>± 0.058  | 0.362<br>±0.035   |
|               | $\kappa$ | 0.322<br>± 0.071 | 0.250<br>±0.074  | 0.261<br>±0.043 | 0.314<br>±0.075 | 0.089<br>±0.050 | 0.019<br>±0.025  | 0.194<br>±0.022 | 0.075<br>±0.079 | 0.086<br>±0.044 | 0.000<br>±0.000  | 0.097<br>±0.039 | 0.061<br>±0.036 | 0.058<br>±0.096 | -0.058<br>±0.023 | 0.283<br>±0.056   | 0.039<br>±0.018   | 0.281<br>±0.039   | 0.064<br>±0.048   | 0.342<br>± 0.053  | 0.014<br>±0.024   |
|               | AUC      | 0.768<br>± 0.031 | 0.761<br>±0.038  | 0.728<br>±0.016 | 0.764<br>±0.039 | 0.587<br>±0.041 | 0.492<br>±0.034  | 0.668<br>±0.042 | 0.568<br>±0.047 | 0.590<br>±0.028 | 0.490<br>±0.023  | 0.590<br>±0.047 | 0.597<br>±0.023 | 0.532<br>±0.073 | 0.412<br>±0.008  | 0.741<br>±0.038   | 0.531<br>±0.027   | 0.740<br>±0.028   | 0.550<br>±0.048   | 0.772<br>± 0.035  | 0.550<br>±0.034   |
|               | BAcc     | 0.419<br>± 0.061 | 0.357<br>±0.064  | 0.367<br>±0.037 | 0.412<br>±0.064 | 0.219<br>±0.043 | 0.160<br>±0.022  | 0.310<br>±0.019 | 0.207<br>±0.068 | 0.217<br>±0.038 | 0.143<br>±0.000  | 0.226<br>±0.034 | 0.195<br>±0.031 | 0.193<br>±0.083 | 0.093<br>±0.020  | 0.386<br>±0.048   | 0.176<br>±0.016   | 0.383<br>±0.033   | 0.198<br>±0.041   | 0.436<br>± 0.046  | 0.155<br>±0.021   |
|               | Acc.1    | 0.419<br>± 0.061 | 0.357<br>±0.064  | 0.367<br>±0.037 | 0.412<br>±0.064 | 0.219<br>±0.043 | 0.160<br>±0.022  | 0.310<br>±0.019 | 0.207<br>±0.068 | 0.214<br>±0.037 | 0.143<br>±0.000  | 0.238<br>±0.037 | 0.186<br>±0.023 | 0.193<br>±0.083 | 0.093<br>±0.020  | 0.386<br>±0.048   | 0.174<br>±0.018   | 0.383<br>±0.033   | 0.198<br>±0.041   | 0.432<br>± 0.047  | 0.155<br>±0.021   |
| sub8          | Acc.2    | 0.583<br>±0.062  | 0.567<br>±0.059  | 0.581<br>±0.036 | 0.569<br>±0.060 | 0.383<br>±0.045 | 0.293<br>±0.056  | 0.500<br>±0.064 | 0.364<br>±0.053 | 0.407<br>±0.046 | 0.286<br>±0.000  | 0.400<br>±0.040 | 0.393<br>±0.040 | 0.336<br>±0.081 | 0.210<br>±0.022  | 0.598<br>± 0.082  | 0.317<br>±0.057   | 0.595<br>±0.038   | 0.319<br>±0.018   | 0.645<br>± 0.064  | 0.324<br>±0.042   |
|               | $\kappa$ | 0.294<br>±0.056  | 0.317<br>±0.070  | 0.308<br>±0.057 | 0.289<br>±0.067 | 0.097<br>±0.089 | -0.000<br>±0.033 | 0.156<br>±0.039 | 0.061<br>±0.025 | 0.061<br>±0.092 | -0.003<br>±0.006 | 0.072<br>±0.027 | 0.047<br>±0.053 | 0.014<br>±0.031 | -0.039<br>±0.027 | 0.411<br>±0.061   | 0.128<br>±0.065   | 0.458<br>± 0.069  | 0.103<br>±0.029   | 0.489<br>± 0.058  | 0.072<br>±0.050   |
|               | AUC      | 0.778<br>±0.028  | 0.771<br>±0.012  | 0.758<br>±0.025 | 0.788<br>±0.014 | 0.592<br>±0.035 | 0.507<br>±0.029  | 0.673<br>±0.033 | 0.536<br>±0.017 | 0.545<br>±0.068 | 0.485<br>±0.048  | 0.576<br>±0.023 | 0.560<br>±0.037 | 0.501<br>±0.042 | 0.453<br>±0.022  | 0.798<br>±0.023   | 0.609<br>±0.051   | 0.823<br>± 0.019  | 0.616<br>±0.053   | 0.834<br>± 0.043  | 0.591<br>±0.034   |
|               | BAcc     | 0.395<br>±0.048  | 0.414<br>±0.060  | 0.407<br>±0.049 | 0.390<br>±0.057 | 0.226<br>±0.077 | 0.143<br>±0.028  | 0.276<br>±0.033 | 0.195<br>±0.022 | 0.195<br>±0.079 | 0.140<br>±0.005  | 0.205<br>±0.023 | 0.183<br>±0.045 | 0.155<br>±0.027 | 0.110<br>±0.023  | 0.495<br>±0.052   | 0.252<br>±0.056   | 0.536<br>± 0.059  | 0.231<br>±0.025   | 0.562<br>± 0.049  | 0.205<br>±0.043   |
|               | Acc.1    | 0.395<br>±0.048  | 0.414<br>±0.060  | 0.407<br>±0.049 | 0.390<br>±0.057 | 0.231<br>±0.084 | 0.143<br>±0.028  | 0.276<br>±0.033 | 0.195<br>±0.022 | 0.198<br>±0.078 | 0.140<br>±0.005  | 0.204<br>±0.028 | 0.194<br>±0.050 | 0.154<br>±0.025 | 0.107<br>±0.022  | 0.495<br>±0.052   | 0.252<br>±0.056   | 0.534<br>± 0.056  | 0.231<br>±0.025   | 0.567<br>± 0.046  | 0.204<br>±0.038   |
|               | Acc.2    | 0.629<br>±0.063  | 0.588<br>±0.023  | 0.600<br>±0.050 | 0.624<br>±0.039 | 0.383<br>±0.057 | 0.286<br>±0.025  | 0.507<br>±0.058 | 0.336<br>±0.042 | 0.345<br>±0.080 | 0.281<br>±0.011  | 0.356<br>±0.040 | 0.344<br>±0.044 | 0.298<br>±0.036 | 0.231<br>±0.051  | 0.662<br>±0.041   | 0.414<br>±0.070   | 0.700<br>± 0.050  | 0.398<br>±0.060   | 0.735<br>± 0.074  | 0.386<br>±0.033   |
| sub9          | $\kappa$ | 0.294<br>±0.056  | 0.317<br>±0.070  | 0.308<br>±0.057 | 0.289<br>±0.067 | 0.097<br>±0.089 | -0.000<br>±0.033 | 0.156<br>±0.039 | 0.061<br>±0.025 | 0.061<br>±0.092 | -0.003<br>±0.006 | 0.072<br>±0.027 | 0.047<br>±0.053 | 0.014<br>±0.031 | -0.039<br>±0.027 | 0.411<br>±0.061   | 0.128<br>±0.065   | 0.458<br>± 0.069  | 0.103<br>±0.029   | 0.489<br>± 0.058  | 0.072<br>±0.050   |
|               | AUC      | 0.778<br>±0.028  | 0.771<br>±0.012  | 0.758<br>±0.025 | 0.788<br>±0.014 | 0.592<br>±0.035 | 0.507<br>±0.029  | 0.673<br>±0.033 | 0.536<br>±0.017 | 0.545<br>±0.068 | 0.485<br>±0.048  | 0.576<br>±0.023 | 0.560<br>±0.037 | 0.501<br>±0.042 | 0.453<br>±0.022  | 0.798<br>±0.023   | 0.609<br>±0.051   | 0.823<br>± 0.019  | 0.616<br>±0.053   | 0.834<br>± 0.043  | 0.591<br>±0.034   |
|               | BAcc     | 0.395<br>±0.048  | 0.414<br>±0.060  | 0.407<br>±0.049 | 0.390<br>±0.057 | 0.226<br>±0.077 | 0.143<br>±0.028  | 0.276<br>±0.033 | 0.195<br>±0.022 | 0.195<br>±0.079 | 0.140<br>±0.005  | 0.205<br>±0.023 | 0.183<br>±0.045 | 0.155<br>±0.027 | 0.110<br>±0.023  | 0.495<br>±0.052   | 0.252<br>±0.056   | 0.536<br>± 0.059  | 0.231<br>±0.025   | 0.562<br>± 0.049  | 0.205<br>±0.043   |
|               | Acc.1    | 0.395<br>±0.048  | 0.414<br>±0.060  | 0.407<br>±0.049 | 0.390<br>±0.057 | 0.231<br>±0.084 | 0.143<br>±0.028  | 0.276<br>±0.033 | 0.195<br>±0.022 | 0.198<br>±0.078 | 0.140<br>±0.005  | 0.204<br>±0.028 | 0.194<br>±0.050 | 0.154<br>±0.025 | 0.107<br>±0.022  | 0.495<br>±0.052   | 0.252<br>±0.056   | 0.534<br>± 0.056  | 0.231<br>±0.025   | 0.567<br>± 0.046  | 0.204<br>±0.038   |
|               | Acc.2    | 0.629<br>±0.063  | 0.588<br>±0.023  | 0.600<br>±0.050 | 0.624<br>±0.039 | 0.383<br>±0.057 | 0.286<br>±0.025  | 0.507<br>±0.058 | 0.336<br>±0.042 | 0.345<br>±0.080 | 0.281<br>±0.011  | 0.356<br>±0.040 | 0.344<br>±0.044 | 0.298<br>±0.036 | 0.231<br>±0.051  | 0.662<br>±0.041   | 0.414<br>±0.070   | 0.700<br>± 0.050  | 0.398<br>±0.060   | 0.735<br>± 0.074  | 0.386<br>±0.033   |
|               | Acc.2    | 0.629<br>±0.063  | 0.588<br>±0.023  | 0.600<br>±0.050 | 0.624<br>±0.039 | 0.383<br>±0.057 | 0.286<br>±0.025  | 0.507<br>±0.058 | 0.336<br>±0.042 | 0.345<br>±0.080 | 0.281<br>±0.011  | 0.356<br>±0.040 | 0.344<br>±0.044 | 0.298<br>±0.036 | 0.231<br>±0.051  | 0.662<br>±0.041   | 0.414<br>±0.070   | 0.700<br>± 0.050  | 0.398<br>±0.060   | 0.735<br>± 0.074  | 0.386<br>±0.033   |

## C.3.3 GENERALIZATION DROP AFTER FINE-TUNING

Table 25: Average Model Performance Drop

| Model (Strategy)         | $\kappa$    | AUC         | BAcc        | Acc.1       | Acc.2       |
|--------------------------|-------------|-------------|-------------|-------------|-------------|
|                          | 0.141       | 0.111       | 0.121       | 0.121       | 0.141       |
| <b>DeepConvnet</b>       | $\pm 0.020$ | $\pm 0.015$ | $\pm 0.017$ | $\pm 0.017$ | $\pm 0.021$ |
|                          | 0.112       | 0.089       | 0.096       | 0.096       | 0.113       |
| <b>EEGNet</b>            | $\pm 0.019$ | $\pm 0.017$ | $\pm 0.017$ | $\pm 0.017$ | $\pm 0.024$ |
|                          | 0.095       | 0.077       | 0.081       | 0.082       | 0.097       |
| <b>Conformer</b>         | $\pm 0.019$ | $\pm 0.014$ | $\pm 0.016$ | $\pm 0.016$ | $\pm 0.021$ |
|                          | 0.149       | 0.118       | 0.127       | 0.127       | 0.150       |
| <b>CTNet</b>             | $\pm 0.023$ | $\pm 0.017$ | $\pm 0.020$ | $\pm 0.020$ | $\pm 0.023$ |
|                          | 0.047       | 0.032       | 0.040       | 0.040       | 0.050       |
| <b>BIOT (f)</b>          | $\pm 0.007$ | $\pm 0.008$ | $\pm 0.006$ | $\pm 0.006$ | $\pm 0.008$ |
|                          | 0.007       | 0.013       | 0.006       | 0.006       | 0.008       |
| <b>BIOT (l)</b>          | $\pm 0.007$ | $\pm 0.011$ | $\pm 0.006$ | $\pm 0.006$ | $\pm 0.011$ |
|                          | 0.049       | 0.032       | 0.042       | 0.042       | 0.046       |
| <b>BENDR (f)</b>         | $\pm 0.014$ | $\pm 0.009$ | $\pm 0.012$ | $\pm 0.012$ | $\pm 0.014$ |
|                          | 0.006       | 0.007       | 0.005       | 0.005       | 0.008       |
| <b>BENDR (l)</b>         | $\pm 0.006$ | $\pm 0.006$ | $\pm 0.005$ | $\pm 0.005$ | $\pm 0.008$ |
|                          | 0.024       | 0.015       | 0.020       | 0.020       | 0.024       |
| <b>CBraMod (f)</b>       | $\pm 0.008$ | $\pm 0.005$ | $\pm 0.007$ | $\pm 0.008$ | $\pm 0.009$ |
|                          | -0.007      | -0.024      | -0.006      | -0.007      | -0.012      |
| <b>CBraMod (l)</b>       | $\pm 0.003$ | $\pm 0.004$ | $\pm 0.003$ | $\pm 0.002$ | $\pm 0.003$ |
|                          | 0.018       | 0.014       | 0.016       | 0.016       | 0.019       |
| <b>EEGPT (f)</b>         | $\pm 0.007$ | $\pm 0.006$ | $\pm 0.006$ | $\pm 0.006$ | $\pm 0.008$ |
|                          | 0.107       | 0.102       | 0.092       | 0.092       | 0.121       |
| <b>EEGPT (l)</b>         | $\pm 0.011$ | $\pm 0.014$ | $\pm 0.010$ | $\pm 0.009$ | $\pm 0.015$ |
|                          | 0.005       | 0.008       | 0.004       | 0.005       | 0.009       |
| <b>LaBraM (f)</b>        | $\pm 0.007$ | $\pm 0.012$ | $\pm 0.006$ | $\pm 0.006$ | $\pm 0.010$ |
|                          | -0.003      | -0.005      | -0.003      | -0.003      | -0.005      |
| <b>LaBraM (l)</b>        | $\pm 0.006$ | $\pm 0.004$ | $\pm 0.005$ | $\pm 0.005$ | $\pm 0.004$ |
|                          | 0.079       | 0.048       | 0.068       | 0.068       | 0.081       |
| <b>STEEGformer-s (f)</b> | $\pm 0.021$ | $\pm 0.014$ | $\pm 0.018$ | $\pm 0.018$ | $\pm 0.020$ |
|                          | 0.039       | 0.029       | 0.033       | 0.033       | 0.041       |
| <b>STEEGformer-s (l)</b> | $\pm 0.010$ | $\pm 0.006$ | $\pm 0.009$ | $\pm 0.009$ | $\pm 0.012$ |
|                          | 0.056       | 0.032       | 0.048       | 0.048       | 0.059       |
| <b>STEEGformer-b (f)</b> | $\pm 0.021$ | $\pm 0.014$ | $\pm 0.018$ | $\pm 0.018$ | $\pm 0.020$ |
|                          | 0.028       | 0.013       | 0.024       | 0.024       | 0.031       |
| <b>STEEGformer-b (l)</b> | $\pm 0.014$ | $\pm 0.004$ | $\pm 0.012$ | $\pm 0.012$ | $\pm 0.015$ |
|                          | 0.066       | 0.031       | 0.057       | 0.057       | 0.066       |
| <b>STEEGformer-l (f)</b> | $\pm 0.023$ | $\pm 0.014$ | $\pm 0.019$ | $\pm 0.019$ | $\pm 0.021$ |
|                          | 0.040       | 0.019       | 0.034       | 0.034       | 0.046       |
| <b>STEEGformer-l (l)</b> | $\pm 0.012$ | $\pm 0.005$ | $\pm 0.010$ | $\pm 0.010$ | $\pm 0.013$ |

Table 26: Per-Subject Average Drop on Seen Subjects (Post-Fine-Tuning).

| Subject | Metric   | DeepConvnet | EEGNet      | Conformer   | CTNet       | BIOT (f)    | BIOT (l)     | BENDR (f)   | BENDR (l)   | CBraMod (f) | CBraMod (l)   | EEGPT (f)   | EEGPT (l)   | LaBraM (f)    | LaBraM (l)    | STEEGformer-s (f) | STEEGformer-s (l) | STEEGformer-b (f) | STEEGformer-b (l) | STEEGformer-l (f) | STEEGformer-l (l) |
|---------|----------|-------------|-------------|-------------|-------------|-------------|--------------|-------------|-------------|-------------|---------------|-------------|-------------|---------------|---------------|-------------------|-------------------|-------------------|-------------------|-------------------|-------------------|
| sub1    | $\kappa$ | 0.170       | 0.152       | 0.114       | 0.177       | 0.047       | <b>0.000</b> | 0.068       | 0.004       | 0.029       | -0.011        | 0.032       | 0.125       | 0.001         | 0.004         | 0.067             | 0.036             | 0.061             | 0.005             | 0.064             | 0.038             |
|         |          | $\pm 0.093$ | $\pm 0.066$ | $\pm 0.065$ | $\pm 0.073$ | $\pm 0.079$ | $\pm 0.021$  | $\pm 0.033$ | $\pm 0.029$ | $\pm 0.052$ | $\pm 0.018$   | $\pm 0.037$ | $\pm 0.070$ | $\pm 0.005$   | $\pm 0.016$   | $\pm 0.031$       | $\pm 0.053$       | $\pm 0.022$       | $\pm 0.030$       | $\pm 0.032$       | $\pm 0.043$       |
|         | AUC      | 0.132       | 0.119       | 0.091       | 0.137       | 0.036       | 0.001        | 0.041       | 0.006       | 0.015       | -0.029        | 0.025       | 0.117       | -0.001        | <b>-0.003</b> | 0.044             | 0.025             | 0.036             | 0.009             | 0.031             | 0.013             |
|         |          | $\pm 0.027$ | $\pm 0.023$ | $\pm 0.021$ | $\pm 0.027$ | $\pm 0.043$ | $\pm 0.018$  | $\pm 0.018$ | $\pm 0.016$ | $\pm 0.022$ | $\pm 0.031$   | $\pm 0.020$ | $\pm 0.059$ | $\pm 0.011$   | $\pm 0.016$   | $\pm 0.022$       | $\pm 0.024$       | $\pm 0.019$       | $\pm 0.012$       | $\pm 0.016$       | $\pm 0.011$       |
|         | BAcc     | 0.146       | 0.131       | 0.098       | 0.152       | 0.040       | <b>0.000</b> | 0.059       | 0.004       | 0.025       | -0.010        | 0.027       | 0.107       | 0.001         | 0.004         | 0.058             | 0.031             | 0.053             | 0.005             | 0.055             | 0.033             |
|         |          | $\pm 0.080$ | $\pm 0.056$ | $\pm 0.056$ | $\pm 0.062$ | $\pm 0.068$ | $\pm 0.018$  | $\pm 0.028$ | $\pm 0.025$ | $\pm 0.045$ | $\pm 0.015$   | $\pm 0.031$ | $\pm 0.060$ | $\pm 0.004$   | $\pm 0.013$   | $\pm 0.027$       | $\pm 0.046$       | $\pm 0.019$       | $\pm 0.026$       | $\pm 0.028$       | $\pm 0.037$       |
| sub10   | $\kappa$ | 0.146       | 0.131       | 0.098       | 0.152       | 0.040       | 0.000        | 0.059       | 0.004       | 0.025       | -0.009        | 0.026       | 0.105       | <b>-0.000</b> | 0.003         | 0.058             | 0.031             | 0.052             | 0.005             | 0.056             | 0.032             |
|         |          | $\pm 0.081$ | $\pm 0.056$ | $\pm 0.056$ | $\pm 0.062$ | $\pm 0.068$ | $\pm 0.018$  | $\pm 0.028$ | $\pm 0.025$ | $\pm 0.045$ | $\pm 0.013$   | $\pm 0.031$ | $\pm 0.062$ | $\pm 0.003$   | $\pm 0.014$   | $\pm 0.027$       | $\pm 0.046$       | $\pm 0.019$       | $\pm 0.025$       | $\pm 0.030$       | $\pm 0.037$       |
|         | AUC      | 0.163       | 0.154       | 0.113       | 0.161       | 0.058       | 0.004        | 0.051       | 0.009       | 0.018       | -0.015        | 0.033       | 0.141       | 0.000         | <b>-0.004</b> | 0.068             | 0.047             | 0.050             | 0.015             | 0.058             | 0.043             |
|         |          | $\pm 0.058$ | $\pm 0.052$ | $\pm 0.043$ | $\pm 0.053$ | $\pm 0.062$ | $\pm 0.025$  | $\pm 0.025$ | $\pm 0.030$ | $\pm 0.040$ | $\pm 0.019$   | $\pm 0.034$ | $\pm 0.077$ | $\pm 0.003$   | $\pm 0.014$   | $\pm 0.031$       | $\pm 0.050$       | $\pm 0.028$       | $\pm 0.037$       | $\pm 0.029$       | $\pm 0.037$       |
|         | BAcc     | 0.119       | 0.085       | 0.080       | 0.111       | 0.056       | 0.010        | 0.046       | 0.012       | 0.033       | -0.007        | 0.025       | 0.116       | <b>-0.006</b> | -0.005        | 0.071             | 0.034             | 0.063             | 0.034             | 0.044             | 0.032             |
|         |          | $\pm 0.105$ | $\pm 0.054$ | $\pm 0.073$ | $\pm 0.097$ | $\pm 0.044$ | $\pm 0.018$  | $\pm 0.044$ | $\pm 0.031$ | $\pm 0.029$ | $\pm 0.018$   | $\pm 0.036$ | $\pm 0.083$ | $\pm 0.014$   | $\pm 0.014$   | $\pm 0.045$       | $\pm 0.032$       | $\pm 0.031$       | $\pm 0.045$       | $\pm 0.032$       | $\pm 0.045$       |
| sub11   | $\kappa$ | 0.099       | 0.079       | 0.066       | 0.091       | 0.049       | 0.020        | 0.020       | 0.010       | 0.017       | -0.026        | 0.018       | 0.111       | <b>-0.012</b> | -0.000        | 0.039             | 0.036             | 0.026             | 0.010             | 0.020             | 0.023             |
|         |          | $\pm 0.040$ | $\pm 0.014$ | $\pm 0.032$ | $\pm 0.030$ | $\pm 0.030$ | $\pm 0.033$  | $\pm 0.022$ | $\pm 0.016$ | $\pm 0.013$ | $\pm 0.023$   | $\pm 0.016$ | $\pm 0.059$ | $\pm 0.011$   | $\pm 0.033$   | $\pm 0.019$       | $\pm 0.020$       | $\pm 0.021$       | $\pm 0.013$       | $\pm 0.012$       | $\pm 0.015$       |
|         | AUC      | 0.102       | 0.073       | 0.069       | 0.095       | 0.048       | 0.009        | 0.039       | 0.010       | 0.028       | -0.006        | 0.022       | 0.099       | <b>-0.005</b> | -0.004        | 0.061             | 0.029             | 0.054             | 0.029             | 0.038             | 0.028             |
|         |          | $\pm 0.090$ | $\pm 0.047$ | $\pm 0.062$ | $\pm 0.083$ | $\pm 0.038$ | $\pm 0.015$  | $\pm 0.038$ | $\pm 0.026$ | $\pm 0.025$ | $\pm 0.016$   | $\pm 0.031$ | $\pm 0.071$ | $\pm 0.012$   | $\pm 0.012$   | $\pm 0.038$       | $\pm 0.027$       | $\pm 0.026$       | $\pm 0.038$       | $\pm 0.028$       | $\pm 0.039$       |
|         | BAcc     | 0.102       | 0.073       | 0.069       | 0.095       | 0.048       | 0.009        | 0.039       | 0.010       | 0.029       | -0.008        | 0.023       | 0.100       | -0.003        | <b>-0.004</b> | 0.060             | 0.029             | 0.054             | 0.029             | 0.038             | 0.028             |
|         |          | $\pm 0.090$ | $\pm 0.046$ | $\pm 0.062$ | $\pm 0.083$ | $\pm 0.038$ | $\pm 0.015$  | $\pm 0.038$ | $\pm 0.027$ | $\pm 0.025$ | $\pm 0.014$   | $\pm 0.031$ | $\pm 0.071$ | $\pm 0.007$   | $\pm 0.012$   | $\pm 0.038$       | $\pm 0.028$       | $\pm 0.026$       | $\pm 0.039$       | $\pm 0.029$       | $\pm 0.038$       |
| sub12   | $\kappa$ | 0.126       | 0.094       | 0.079       | 0.120       | 0.062       | 0.008        | 0.033       | -0.000      | 0.027       | -0.018        | 0.023       | 0.127       | -0.008        | <b>-0.009</b> | 0.080             | 0.038             | 0.071             | 0.049             | 0.057             | 0.047             |
|         |          | $\pm 0.085$ | $\pm 0.034$ | $\pm 0.059$ | $\pm 0.056$ | $\pm 0.046$ | $\pm 0.021$  | $\pm 0.042$ | $\pm 0.025$ | $\pm 0.014$ | $\pm 0.021$   | $\pm 0.028$ | $\pm 0.083$ | $\pm 0.009$   | $\pm 0.022$   | $\pm 0.039$       | $\pm 0.030$       | $\pm 0.041$       | $\pm 0.032$       | $\pm 0.029$       | $\pm 0.034$       |
|         | AUC      | 0.169       | 0.124       | 0.098       | 0.181       | 0.055       | 0.014        | 0.046       | 0.014       | 0.025       | <b>-0.007</b> | 0.017       | 0.112       | 0.015         | -0.009        | 0.120             | 0.051             | 0.083             | 0.034             | 0.104             | 0.062             |
|         |          | $\pm 0.067$ | $\pm 0.057$ | $\pm 0.076$ | $\pm 0.087$ | $\pm 0.036$ | $\pm 0.029$  | $\pm 0.035$ | $\pm 0.021$ | $\pm 0.022$ | $\pm 0.009$   | $\pm 0.028$ | $\pm 0.083$ | $\pm 0.019$   | $\pm 0.015$   | $\pm 0.047$       | $\pm 0.043$       | $\pm 0.043$       | $\pm 0.032$       | $\pm 0.037$       | $\pm 0.041$       |
|         | BAcc     | 0.115       | 0.086       | 0.075       | 0.124       | 0.038       | 0.028        | 0.027       | 0.009       | 0.014       | -0.021        | 0.010       | 0.111       | 0.025         | <b>-0.004</b> | 0.063             | 0.037             | 0.053             | 0.017             | 0.053             | 0.030             |
|         |          | $\pm 0.033$ | $\pm 0.027$ | $\pm 0.025$ | $\pm 0.034$ | $\pm 0.031$ | $\pm 0.028$  | $\pm 0.019$ | $\pm 0.016$ | $\pm 0.013$ | $\pm 0.022$   | $\pm 0.012$ | $\pm 0.057$ | $\pm 0.023$   | $\pm 0.021$   | $\pm 0.031$       | $\pm 0.033$       | $\pm 0.025$       | $\pm 0.015$       | $\pm 0.023$       | $\pm 0.019$       |
| sub13   | $\kappa$ | 0.145       | 0.106       | 0.084       | 0.155       | 0.047       | 0.012        | 0.039       | 0.012       | 0.021       | <b>-0.006</b> | 0.015       | 0.096       | 0.013         | -0.008        | 0.103             | 0.044             | 0.071             | 0.029             | 0.089             | 0.053             |
|         |          | $\pm 0.058$ | $\pm 0.049$ | $\pm 0.065$ | $\pm 0.074$ | $\pm 0.031$ | $\pm 0.025$  | $\pm 0.030$ | $\pm 0.018$ | $\pm 0.019$ | $\pm 0.008$   | $\pm 0.024$ | $\pm 0.071$ | $\pm 0.017$   | $\pm 0.013$   | $\pm 0.041$       | $\pm 0.037$       | $\pm 0.036$       | $\pm 0.027$       | $\pm 0.031$       | $\pm 0.035$       |
|         | AUC      | 0.145       | 0.106       | 0.084       | 0.155       | 0.047       | 0.012        | 0.039       | 0.012       | 0.021       | <b>-0.005</b> | 0.016       | 0.098       | 0.015         | -0.009        | 0.102             | 0.043             | 0.070             | 0.029             | 0.090             | 0.052             |
|         |          | $\pm 0.058$ | $\pm 0.049$ | $\pm 0.065$ | $\pm 0.074$ | $\pm 0.031$ | $\pm 0.025$  | $\pm 0.030$ | $\pm 0.018$ | $\pm 0.019$ | $\pm 0.009$   | $\pm 0.024$ | $\pm 0.075$ | $\pm 0.016$   | $\pm 0.012$   | $\pm 0.040$       | $\pm 0.037$       | $\pm 0.036$       | $\pm 0.027$       | $\pm 0.034$       | $\pm 0.035$       |
|         | BAcc     | 0.161       | 0.116       | 0.093       | 0.160       | 0.058       | 0.007        | 0.042       | 0.014       | 0.028       | -0.010        | 0.004       | 0.128       | 0.020         | <b>-0.009</b> | 0.093             | 0.044             | 0.083             | 0.021             | 0.093             | 0.061             |
|         |          | $\pm 0.053$ | $\pm 0.032$ | $\pm 0.041$ | $\pm 0.059$ | $\pm 0.047$ | $\pm 0.031$  | $\pm 0.028$ | $\pm 0.028$ | $\pm 0.019$ | $\pm 0.009$   | $\pm 0.024$ | $\pm 0.084$ | $\pm 0.027$   | $\pm 0.015$   | $\pm 0.041$       | $\pm 0.045$       | $\pm 0.042$       | $\pm 0.018$       | $\pm 0.044$       | $\pm 0.046$       |

Continued on next page

| SubjectMetric |          | DeepConvnet          | EEGNet               | Conformer            | CTNet                | BIOT (f)             | BIOT (l)              | BENDR (f)            | BENDR (l)                    | CBraMod (f)          | CBraMod (l)                  | EEGPT (f)            | EEGPT (l)            | LaBraM (f)                   | LaBraM (l)                   | STEEGformer-s (f)    | STEEGformer-s (l)    | STEEGformer-b (f)    | STEEGformer-b (l)    | STEEGformer-l (f)    | STEEGformer-l (l)    |
|---------------|----------|----------------------|----------------------|----------------------|----------------------|----------------------|-----------------------|----------------------|------------------------------|----------------------|------------------------------|----------------------|----------------------|------------------------------|------------------------------|----------------------|----------------------|----------------------|----------------------|----------------------|----------------------|
| sub12         | $\kappa$ | 0.121<br>$\pm 0.071$ | 0.118<br>$\pm 0.070$ | 0.107<br>$\pm 0.064$ | 0.139<br>$\pm 0.090$ | 0.039<br>$\pm 0.049$ | 0.012<br>$\pm 0.031$  | 0.072<br>$\pm 0.045$ | <b>-0.006</b><br>$\pm 0.023$ | 0.011<br>$\pm 0.023$ | -0.001<br>$\pm 0.012$        | 0.024<br>$\pm 0.030$ | 0.101<br>$\pm 0.090$ | 0.003<br>$\pm 0.016$         | -0.013<br>$\pm 0.021$        | 0.090<br>$\pm 0.041$ | 0.033<br>$\pm 0.054$ | 0.082<br>$\pm 0.037$ | 0.031<br>$\pm 0.037$ | 0.080<br>$\pm 0.036$ | 0.027<br>$\pm 0.050$ |
|               | AUC      | 0.104<br>$\pm 0.027$ | 0.083<br>$\pm 0.025$ | 0.080<br>$\pm 0.026$ | 0.104<br>$\pm 0.033$ | 0.026<br>$\pm 0.033$ | 0.022<br>$\pm 0.029$  | 0.047<br>$\pm 0.020$ | 0.008<br>$\pm 0.010$         | 0.012<br>$\pm 0.016$ | -0.029<br>$\pm 0.027$        | 0.016<br>$\pm 0.017$ | 0.092<br>$\pm 0.060$ | 0.007<br>$\pm 0.016$         | <b>-0.014</b><br>$\pm 0.025$ | 0.060<br>$\pm 0.024$ | 0.031<br>$\pm 0.030$ | 0.041<br>$\pm 0.025$ | 0.017<br>$\pm 0.014$ | 0.040<br>$\pm 0.021$ | 0.024<br>$\pm 0.019$ |
|               | BAcc     | 0.104<br>$\pm 0.061$ | 0.101<br>$\pm 0.060$ | 0.092<br>$\pm 0.055$ | 0.119<br>$\pm 0.077$ | 0.034<br>$\pm 0.042$ | 0.010<br>$\pm 0.026$  | 0.062<br>$\pm 0.038$ | <b>-0.005</b><br>$\pm 0.019$ | 0.010<br>$\pm 0.020$ | -0.001<br>$\pm 0.010$        | 0.020<br>$\pm 0.025$ | 0.087<br>$\pm 0.077$ | 0.002<br>$\pm 0.013$         | -0.012<br>$\pm 0.018$        | 0.078<br>$\pm 0.035$ | 0.029<br>$\pm 0.046$ | 0.070<br>$\pm 0.032$ | 0.026<br>$\pm 0.032$ | 0.069<br>$\pm 0.031$ | 0.023<br>$\pm 0.043$ |
|               | Acc_1    | 0.104<br>$\pm 0.060$ | 0.101<br>$\pm 0.060$ | 0.092<br>$\pm 0.055$ | 0.119<br>$\pm 0.077$ | 0.034<br>$\pm 0.042$ | 0.010<br>$\pm 0.026$  | 0.062<br>$\pm 0.038$ | <b>-0.005</b><br>$\pm 0.020$ | 0.010<br>$\pm 0.020$ | -0.003<br>$\pm 0.011$        | 0.020<br>$\pm 0.027$ | 0.086<br>$\pm 0.078$ | 0.006<br>$\pm 0.014$         | -0.011<br>$\pm 0.018$        | 0.078<br>$\pm 0.035$ | 0.029<br>$\pm 0.046$ | 0.069<br>$\pm 0.034$ | 0.026<br>$\pm 0.032$ | 0.069<br>$\pm 0.029$ | 0.024<br>$\pm 0.044$ |
|               | Acc_2    | 0.142<br>$\pm 0.053$ | 0.116<br>$\pm 0.052$ | 0.109<br>$\pm 0.046$ | 0.140<br>$\pm 0.064$ | 0.042<br>$\pm 0.040$ | 0.013<br>$\pm 0.034$  | 0.073<br>$\pm 0.027$ | 0.009<br>$\pm 0.026$         | 0.022<br>$\pm 0.021$ | <b>-0.009</b><br>$\pm 0.013$ | 0.022<br>$\pm 0.030$ | 0.101<br>$\pm 0.082$ | 0.017<br>$\pm 0.018$         | -0.011<br>$\pm 0.025$        | 0.103<br>$\pm 0.038$ | 0.041<br>$\pm 0.064$ | 0.083<br>$\pm 0.035$ | 0.035<br>$\pm 0.049$ | 0.099<br>$\pm 0.046$ | 0.026<br>$\pm 0.042$ |
| sub13         | $\kappa$ | 0.138<br>$\pm 0.105$ | 0.110<br>$\pm 0.069$ | 0.095<br>$\pm 0.076$ | 0.146<br>$\pm 0.087$ | 0.046<br>$\pm 0.047$ | 0.022<br>$\pm 0.028$  | 0.046<br>$\pm 0.037$ | 0.009<br>$\pm 0.020$         | 0.033<br>$\pm 0.029$ | -0.008<br>$\pm 0.014$        | 0.008<br>$\pm 0.029$ | 0.106<br>$\pm 0.079$ | <b>-0.002</b><br>$\pm 0.008$ | 0.004<br>$\pm 0.019$         | 0.064<br>$\pm 0.046$ | 0.062<br>$\pm 0.053$ | 0.035<br>$\pm 0.023$ | 0.058<br>$\pm 0.047$ | 0.045<br>$\pm 0.031$ | 0.057<br>$\pm 0.056$ |
|               | AUC      | 0.111<br>$\pm 0.044$ | 0.076<br>$\pm 0.026$ | 0.058<br>$\pm 0.030$ | 0.115<br>$\pm 0.040$ | 0.024<br>$\pm 0.015$ | 0.025<br>$\pm 0.025$  | 0.032<br>$\pm 0.024$ | 0.012<br>$\pm 0.016$         | 0.022<br>$\pm 0.010$ | -0.029<br>$\pm 0.021$        | 0.014<br>$\pm 0.012$ | 0.106<br>$\pm 0.053$ | <b>-0.005</b><br>$\pm 0.013$ | -0.003<br>$\pm 0.021$        | 0.035<br>$\pm 0.017$ | 0.031<br>$\pm 0.030$ | 0.016<br>$\pm 0.011$ | 0.011<br>$\pm 0.015$ | 0.013<br>$\pm 0.013$ | 0.016<br>$\pm 0.015$ |
|               | BAcc     | 0.118<br>$\pm 0.090$ | 0.094<br>$\pm 0.059$ | 0.082<br>$\pm 0.065$ | 0.125<br>$\pm 0.074$ | 0.039<br>$\pm 0.040$ | 0.019<br>$\pm 0.024$  | 0.040<br>$\pm 0.032$ | 0.008<br>$\pm 0.018$         | 0.028<br>$\pm 0.025$ | -0.007<br>$\pm 0.012$        | 0.007<br>$\pm 0.025$ | 0.090<br>$\pm 0.067$ | <b>-0.002</b><br>$\pm 0.007$ | 0.004<br>$\pm 0.016$         | 0.055<br>$\pm 0.040$ | 0.053<br>$\pm 0.046$ | 0.030<br>$\pm 0.020$ | 0.050<br>$\pm 0.040$ | 0.038<br>$\pm 0.026$ | 0.049<br>$\pm 0.048$ |
|               | Acc_1    | 0.118<br>$\pm 0.090$ | 0.094<br>$\pm 0.060$ | 0.082<br>$\pm 0.065$ | 0.125<br>$\pm 0.075$ | 0.039<br>$\pm 0.039$ | 0.019<br>$\pm 0.024$  | 0.040<br>$\pm 0.031$ | 0.008<br>$\pm 0.018$         | 0.029<br>$\pm 0.027$ | -0.006<br>$\pm 0.010$        | 0.006<br>$\pm 0.027$ | 0.092<br>$\pm 0.068$ | <b>-0.003</b><br>$\pm 0.005$ | 0.003<br>$\pm 0.016$         | 0.055<br>$\pm 0.040$ | 0.053<br>$\pm 0.046$ | 0.031<br>$\pm 0.019$ | 0.050<br>$\pm 0.040$ | 0.041<br>$\pm 0.027$ | 0.047<br>$\pm 0.048$ |
|               | Acc_2    | 0.133<br>$\pm 0.091$ | 0.098<br>$\pm 0.041$ | 0.073<br>$\pm 0.049$ | 0.138<br>$\pm 0.062$ | 0.052<br>$\pm 0.045$ | 0.030<br>$\pm 0.031$  | 0.036<br>$\pm 0.033$ | 0.023<br>$\pm 0.029$         | 0.041<br>$\pm 0.022$ | -0.015<br>$\pm 0.019$        | 0.016<br>$\pm 0.030$ | 0.113<br>$\pm 0.080$ | <b>-0.007</b><br>$\pm 0.011$ | 0.003<br>$\pm 0.013$         | 0.065<br>$\pm 0.032$ | 0.078<br>$\pm 0.053$ | 0.039<br>$\pm 0.023$ | 0.067<br>$\pm 0.061$ | 0.047<br>$\pm 0.026$ | 0.080<br>$\pm 0.073$ |
| sub14         | $\kappa$ | 0.125<br>$\pm 0.080$ | 0.098<br>$\pm 0.054$ | 0.092<br>$\pm 0.065$ | 0.124<br>$\pm 0.090$ | 0.045<br>$\pm 0.060$ | 0.001<br>$\pm 0.029$  | 0.036<br>$\pm 0.039$ | -0.001<br>$\pm 0.022$        | 0.029<br>$\pm 0.022$ | -0.005<br>$\pm 0.014$        | 0.014<br>$\pm 0.037$ | 0.115<br>$\pm 0.071$ | 0.006<br>$\pm 0.020$         | <b>-0.005</b><br>$\pm 0.015$ | 0.051<br>$\pm 0.032$ | 0.030<br>$\pm 0.039$ | 0.024<br>$\pm 0.022$ | 0.013<br>$\pm 0.031$ | 0.041<br>$\pm 0.026$ | 0.051<br>$\pm 0.039$ |
|               | AUC      | 0.102<br>$\pm 0.030$ | 0.079<br>$\pm 0.021$ | 0.074<br>$\pm 0.023$ | 0.105<br>$\pm 0.027$ | 0.023<br>$\pm 0.034$ | 0.011<br>$\pm 0.013$  | 0.023<br>$\pm 0.027$ | 0.002<br>$\pm 0.010$         | 0.012<br>$\pm 0.013$ | -0.024<br>$\pm 0.027$        | 0.009<br>$\pm 0.018$ | 0.102<br>$\pm 0.052$ | 0.018<br>$\pm 0.014$         | <b>-0.008</b><br>$\pm 0.019$ | 0.030<br>$\pm 0.014$ | 0.025<br>$\pm 0.021$ | 0.012<br>$\pm 0.016$ | 0.015<br>$\pm 0.012$ | 0.018<br>$\pm 0.009$ | 0.017<br>$\pm 0.013$ |
|               | BAcc     | 0.107<br>$\pm 0.069$ | 0.084<br>$\pm 0.046$ | 0.079<br>$\pm 0.056$ | 0.106<br>$\pm 0.078$ | 0.039<br>$\pm 0.051$ | 0.001<br>$\pm 0.025$  | 0.031<br>$\pm 0.034$ | -0.001<br>$\pm 0.019$        | 0.025<br>$\pm 0.019$ | <b>-0.004</b><br>$\pm 0.012$ | 0.012<br>$\pm 0.032$ | 0.099<br>$\pm 0.061$ | 0.005<br>$\pm 0.017$         | -0.004<br>$\pm 0.013$        | 0.044<br>$\pm 0.028$ | 0.026<br>$\pm 0.034$ | 0.020<br>$\pm 0.019$ | 0.011<br>$\pm 0.026$ | 0.036<br>$\pm 0.022$ | 0.044<br>$\pm 0.033$ |
|               | Acc_1    | 0.107<br>$\pm 0.069$ | 0.084<br>$\pm 0.046$ | 0.079<br>$\pm 0.056$ | 0.106<br>$\pm 0.078$ | 0.039<br>$\pm 0.051$ | 0.001<br>$\pm 0.025$  | 0.031<br>$\pm 0.033$ | -0.001<br>$\pm 0.019$        | 0.024<br>$\pm 0.020$ | <b>-0.005</b><br>$\pm 0.010$ | 0.012<br>$\pm 0.032$ | 0.098<br>$\pm 0.062$ | 0.009<br>$\pm 0.014$         | -0.005<br>$\pm 0.013$        | 0.044<br>$\pm 0.028$ | 0.026<br>$\pm 0.033$ | 0.020<br>$\pm 0.019$ | 0.011<br>$\pm 0.026$ | 0.036<br>$\pm 0.021$ | 0.043<br>$\pm 0.033$ |
|               | Acc_2    | 0.125<br>$\pm 0.065$ | 0.095<br>$\pm 0.053$ | 0.087<br>$\pm 0.044$ | 0.141<br>$\pm 0.055$ | 0.054<br>$\pm 0.064$ | -0.003<br>$\pm 0.021$ | 0.032<br>$\pm 0.038$ | 0.009<br>$\pm 0.029$         | 0.015<br>$\pm 0.022$ | -0.011<br>$\pm 0.019$        | 0.020<br>$\pm 0.030$ | 0.130<br>$\pm 0.090$ | 0.014<br>$\pm 0.018$         | <b>-0.003</b><br>$\pm 0.019$ | 0.056<br>$\pm 0.030$ | 0.032<br>$\pm 0.029$ | 0.028<br>$\pm 0.030$ | 0.020<br>$\pm 0.019$ | 0.039<br>$\pm 0.022$ | 0.046<br>$\pm 0.030$ |
| sub15         | $\kappa$ | 0.128<br>$\pm 0.097$ | 0.113<br>$\pm 0.056$ | 0.089<br>$\pm 0.071$ | 0.158<br>$\pm 0.112$ | 0.047<br>$\pm 0.060$ | -0.004<br>$\pm 0.016$ | 0.034<br>$\pm 0.041$ | -0.003<br>$\pm 0.032$        | 0.021<br>$\pm 0.038$ | <b>-0.007</b><br>$\pm 0.011$ | 0.019<br>$\pm 0.023$ | 0.096<br>$\pm 0.092$ | 0.017<br>$\pm 0.021$         | -0.009<br>$\pm 0.018$        | 0.061<br>$\pm 0.034$ | 0.023<br>$\pm 0.047$ | 0.029<br>$\pm 0.016$ | 0.018<br>$\pm 0.036$ | 0.042<br>$\pm 0.025$ | 0.025<br>$\pm 0.029$ |

Continued on next page

| SubjectMetric |          | DeepConvnet     | EEGNet          | Conformer       | CTNet           | BIOT (f)        | BIOT (l)          | BENDR (f)       | BENDR (l)        | CBraMod (f)     | CBraMod (l)       | EEGPT (f)       | EEGPT (l)       | LaBraM (f)       | LaBraM (l)        | STEEGformer-s (j) | STEEGformer-s (l) | STEEGformer-b (j) | STEEGformer-b (l) | STEEGformer-h (j) | STEEGformer-h (l) |
|---------------|----------|-----------------|-----------------|-----------------|-----------------|-----------------|-------------------|-----------------|------------------|-----------------|-------------------|-----------------|-----------------|------------------|-------------------|-------------------|-------------------|-------------------|-------------------|-------------------|-------------------|
|               | AUC      | 0.104<br>±0.036 | 0.083<br>±0.020 | 0.065<br>±0.022 | 0.120<br>±0.042 | 0.035<br>±0.040 | 0.010<br>±0.025   | 0.028<br>±0.023 | -0.001<br>±0.012 | 0.018<br>±0.015 | -0.025<br>± 0.022 | 0.013<br>±0.016 | 0.098<br>±0.061 | 0.032<br>±0.024  | -0.003<br>± 0.018 | 0.037<br>±0.022   | 0.025<br>±0.035   | 0.018<br>±0.014   | 0.008<br>±0.015   | 0.020<br>±0.016   | 0.015<br>±0.015   |
|               | BAcc     | 0.110<br>±0.083 | 0.097<br>±0.048 | 0.077<br>±0.061 | 0.135<br>±0.096 | 0.040<br>±0.051 | -0.003<br>±0.013  | 0.029<br>±0.035 | -0.003<br>±0.027 | 0.018<br>±0.033 | -0.006<br>± 0.010 | 0.016<br>±0.019 | 0.082<br>±0.078 | 0.014<br>±0.018  | -0.008<br>± 0.016 | 0.052<br>±0.029   | 0.020<br>±0.040   | 0.024<br>±0.014   | 0.016<br>±0.031   | 0.036<br>±0.021   | 0.021<br>±0.025   |
|               | Acc.1    | 0.110<br>±0.083 | 0.096<br>±0.048 | 0.077<br>±0.061 | 0.135<br>±0.096 | 0.040<br>±0.051 | -0.003<br>±0.013  | 0.029<br>±0.035 | -0.003<br>±0.027 | 0.018<br>±0.032 | -0.006<br>± 0.011 | 0.016<br>±0.021 | 0.081<br>±0.080 | 0.014<br>±0.018  | -0.008<br>± 0.015 | 0.052<br>±0.029   | 0.020<br>±0.040   | 0.024<br>±0.014   | 0.015<br>±0.031   | 0.037<br>±0.022   | 0.021<br>±0.025   |
|               | Acc.2    | 0.123<br>±0.074 | 0.107<br>±0.042 | 0.092<br>±0.036 | 0.154<br>±0.080 | 0.053<br>±0.066 | -0.004<br>±0.015  | 0.050<br>±0.053 | -0.003<br>±0.024 | 0.031<br>±0.034 | -0.012<br>± 0.019 | 0.016<br>±0.022 | 0.118<br>±0.084 | 0.024<br>±0.026  | -0.008<br>± 0.026 | 0.068<br>±0.037   | 0.026<br>±0.049   | 0.033<br>±0.025   | 0.017<br>±0.033   | 0.042<br>±0.029   | 0.037<br>±0.040   |
|               | $\kappa$ | 0.146<br>±0.068 | 0.091<br>±0.058 | 0.098<br>±0.067 | 0.151<br>±0.092 | 0.037<br>±0.043 | 0.001<br>±0.021   | 0.052<br>±0.040 | 0.011<br>±0.030  | 0.032<br>±0.025 | -0.008<br>± 0.012 | 0.023<br>±0.031 | 0.099<br>±0.080 | 0.014<br>±0.017  | -0.001<br>± 0.016 | 0.105<br>±0.044   | 0.041<br>±0.045   | 0.063<br>±0.034   | 0.016<br>±0.031   | 0.106<br>±0.056   | 0.041<br>±0.029   |
| sub2          | AUC      | 0.112<br>±0.026 | 0.080<br>±0.021 | 0.079<br>±0.018 | 0.118<br>±0.034 | 0.020<br>±0.027 | -0.004<br>±0.018  | 0.035<br>±0.022 | 0.010<br>±0.018  | 0.022<br>±0.014 | -0.017<br>± 0.015 | 0.011<br>±0.015 | 0.095<br>±0.062 | 0.012<br>±0.014  | -0.006<br>± 0.034 | 0.065<br>±0.030   | 0.033<br>±0.020   | 0.039<br>±0.022   | 0.010<br>±0.014   | 0.056<br>±0.028   | 0.015<br>±0.014   |
|               | BAcc     | 0.125<br>±0.059 | 0.078<br>±0.050 | 0.084<br>±0.058 | 0.129<br>±0.079 | 0.032<br>±0.037 | 0.001<br>±0.018   | 0.045<br>±0.034 | 0.010<br>±0.026  | 0.027<br>±0.022 | -0.007<br>± 0.010 | 0.019<br>±0.026 | 0.085<br>±0.069 | 0.012<br>±0.015  | -0.001<br>± 0.014 | 0.090<br>±0.038   | 0.035<br>±0.038   | 0.054<br>±0.029   | 0.013<br>±0.027   | 0.091<br>±0.048   | 0.036<br>±0.025   |
|               | Acc.1    | 0.125<br>±0.059 | 0.079<br>±0.049 | 0.084<br>±0.058 | 0.130<br>±0.079 | 0.032<br>±0.037 | 0.001<br>±0.018   | 0.045<br>±0.034 | 0.009<br>±0.026  | 0.027<br>±0.021 | -0.006<br>± 0.010 | 0.021<br>±0.026 | 0.086<br>±0.071 | 0.012<br>±0.015  | -0.001<br>± 0.013 | 0.090<br>±0.038   | 0.035<br>±0.039   | 0.054<br>±0.030   | 0.014<br>±0.027   | 0.089<br>±0.046   | 0.036<br>±0.026   |
|               | Acc.2    | 0.144<br>±0.049 | 0.098<br>±0.035 | 0.094<br>±0.033 | 0.144<br>±0.060 | 0.032<br>±0.045 | -0.008<br>± 0.021 | 0.040<br>±0.037 | 0.015<br>±0.027  | 0.035<br>±0.025 | -0.010<br>± 0.012 | 0.021<br>±0.027 | 0.104<br>±0.083 | 0.019<br>±0.020  | -0.005<br>± 0.036 | 0.103<br>±0.042   | 0.050<br>±0.051   | 0.070<br>±0.031   | 0.021<br>±0.032   | 0.091<br>±0.040   | 0.038<br>±0.035   |
|               | $\kappa$ | 0.129<br>±0.045 | 0.129<br>±0.044 | 0.086<br>±0.041 | 0.130<br>±0.049 | 0.056<br>±0.042 | 0.010<br>±0.025   | 0.022<br>±0.025 | 0.007<br>±0.020  | 0.023<br>±0.039 | -0.012<br>± 0.011 | 0.008<br>±0.028 | 0.109<br>±0.073 | -0.003<br>±0.009 | -0.003<br>± 0.021 | 0.072<br>±0.036   | 0.034<br>±0.042   | 0.049<br>±0.025   | 0.031<br>±0.041   | 0.051<br>±0.030   | 0.052<br>±0.040   |
| sub3          | AUC      | 0.112<br>±0.018 | 0.115<br>±0.019 | 0.092<br>±0.020 | 0.123<br>±0.018 | 0.034<br>±0.030 | 0.008<br>±0.021   | 0.030<br>±0.018 | 0.007<br>±0.015  | 0.019<br>±0.017 | -0.026<br>± 0.027 | 0.007<br>±0.017 | 0.094<br>±0.030 | 0.000<br>±0.006  | -0.003<br>± 0.021 | 0.042<br>±0.021   | 0.027<br>±0.014   | 0.028<br>±0.017   | 0.012<br>±0.010   | 0.025<br>±0.012   | 0.020<br>±0.016   |
|               | BAcc     | 0.110<br>±0.038 | 0.111<br>±0.037 | 0.074<br>±0.035 | 0.112<br>±0.042 | 0.048<br>±0.036 | 0.008<br>±0.021   | 0.019<br>±0.021 | 0.006<br>±0.017  | 0.020<br>±0.034 | -0.010<br>± 0.010 | 0.007<br>±0.024 | 0.093<br>±0.063 | -0.003<br>±0.008 | -0.003<br>± 0.018 | 0.061<br>±0.031   | 0.029<br>±0.036   | 0.042<br>±0.022   | 0.027<br>±0.035   | 0.044<br>±0.025   | 0.045<br>±0.034   |
|               | Acc.1    | 0.110<br>±0.038 | 0.111<br>±0.038 | 0.074<br>±0.035 | 0.112<br>±0.042 | 0.049<br>±0.036 | 0.008<br>±0.020   | 0.019<br>±0.022 | 0.006<br>±0.018  | 0.019<br>±0.036 | -0.007<br>± 0.011 | 0.008<br>±0.026 | 0.093<br>±0.066 | -0.002<br>±0.011 | -0.003<br>± 0.018 | 0.062<br>±0.031   | 0.029<br>±0.036   | 0.043<br>±0.021   | 0.027<br>±0.035   | 0.043<br>±0.024   | 0.046<br>±0.036   |
|               | Acc.2    | 0.132<br>±0.036 | 0.142<br>±0.033 | 0.110<br>±0.030 | 0.149<br>±0.036 | 0.045<br>±0.047 | 0.016<br>±0.027   | 0.039<br>±0.031 | 0.008<br>±0.027  | 0.029<br>±0.040 | -0.012<br>± 0.011 | 0.014<br>±0.025 | 0.128<br>±0.073 | 0.001<br>± 0.011 | 0.002<br>±0.019   | 0.077<br>±0.021   | 0.040<br>±0.040   | 0.043<br>±0.020   | 0.040<br>±0.032   | 0.042<br>±0.032   | 0.055<br>±0.044   |
|               | $\kappa$ | 0.131<br>±0.047 | 0.107<br>±0.044 | 0.070<br>±0.039 | 0.134<br>±0.050 | 0.037<br>±0.030 | 0.015<br>±0.020   | 0.044<br>±0.026 | 0.004<br>±0.018  | 0.019<br>±0.022 | -0.002<br>± 0.007 | 0.008<br>±0.032 | 0.082<br>±0.043 | 0.007<br>±0.014  | -0.000<br>± 0.016 | 0.120<br>±0.064   | 0.029<br>±0.031   | 0.099<br>±0.043   | 0.020<br>±0.027   | 0.092<br>±0.062   | 0.035<br>±0.026   |
| sub4          | AUC      | 0.114<br>±0.020 | 0.092<br>±0.019 | 0.073<br>±0.022 | 0.119<br>±0.017 | 0.024<br>±0.016 | 0.006<br>±0.016   | 0.023<br>±0.012 | 0.008<br>±0.012  | 0.011<br>±0.011 | -0.017<br>± 0.022 | 0.010<br>±0.020 | 0.072<br>±0.029 | 0.007<br>±0.017  | -0.010<br>± 0.014 | 0.070<br>±0.035   | 0.018<br>±0.013   | 0.052<br>±0.025   | 0.009<br>±0.008   | 0.033<br>±0.023   | 0.018<br>±0.009   |
|               |          |                 |                 |                 |                 |                 |                   |                 |                  |                 |                   |                 |                 |                  |                   |                   |                   |                   |                   |                   |                   |

Continued on next page

| SubjectMetric |          | DeepConvnet | EEGNet | Conformer | CTNet  | BIOT (f) | BIOT (l) | BENDR (f) | BENDR (l) | CBraMod (f) | CBraMod (l) | EEGPT (f) | EEGPT (l) | LaBraM (f) | LaBraM (l) | STEEGformer-s (f) | STEEGformer-s (l) | STEEGformer-b (f) | STEEGformer-b (l) | STEEGformer-l (f) | STEEGformer-l (l) |
|---------------|----------|-------------|--------|-----------|--------|----------|----------|-----------|-----------|-------------|-------------|-----------|-----------|------------|------------|-------------------|-------------------|-------------------|-------------------|-------------------|-------------------|
| sub5          | BAcc     | 0.112       | 0.092  | 0.060     | 0.115  | 0.031    | 0.013    | 0.038     | 0.004     | 0.016       | -0.002      | 0.006     | 0.070     | 0.006      | -0.000     | 0.103             | 0.025             | 0.085             | 0.017             | 0.079             | 0.030             |
|               |          | ±0.040      | ±0.038 | ±0.034    | ±0.042 | ±0.026   | ±0.017   | ±0.023    | ±0.016    | ±0.019      | ±0.006      | ±0.027    | ±0.037    | ±0.012     | ±0.013     | ±0.055            | ±0.026            | ±0.037            | ±0.023            | ±0.053            | ±0.022            |
|               | Acc_1    | 0.112       | 0.091  | 0.060     | 0.115  | 0.031    | 0.013    | 0.038     | 0.004     | 0.016       | -0.003      | 0.008     | 0.071     | 0.004      | 0.000      | 0.103             | 0.025             | 0.084             | 0.018             | 0.078             | 0.031             |
|               |          | ±0.040      | ±0.037 | ±0.034    | ±0.042 | ±0.026   | ±0.017   | ±0.023    | ±0.016    | ±0.019      | ±0.006      | ±0.027    | ±0.037    | ±0.008     | ±0.013     | ±0.055            | ±0.026            | ±0.037            | ±0.023            | ±0.054            | ±0.020            |
|               | Acc_2    | 0.139       | 0.106  | 0.077     | 0.153  | 0.038    | 0.010    | 0.043     | 0.019     | 0.028       | -0.011      | 0.019     | 0.092     | 0.008      | -0.004     | 0.124             | 0.035             | 0.084             | 0.021             | 0.079             | 0.050             |
|               |          | ±0.040      | ±0.030 | ±0.025    | ±0.035 | ±0.021   | ±0.018   | ±0.020    | ±0.019    | ±0.023      | ±0.013      | ±0.037    | ±0.029    | ±0.011     | ±0.023     | ±0.052            | ±0.024            | ±0.052            | ±0.020            | ±0.049            | ±0.030            |
|               | $\kappa$ | 0.133       | 0.097  | 0.069     | 0.141  | 0.052    | -0.003   | 0.048     | 0.005     | 0.023       | -0.004      | 0.019     | 0.106     | 0.001      | 0.003      | 0.063             | 0.035             | 0.035             | 0.019             | 0.038             | 0.020             |
|               |          | ±0.093      | ±0.059 | ±0.049    | ±0.098 | ±0.054   | ±0.024   | ±0.044    | ±0.020    | ±0.023      | ±0.013      | ±0.023    | ±0.091    | ±0.005     | ±0.015     | ±0.033            | ±0.044            | ±0.023            | ±0.028            | ±0.023            | ±0.028            |
|               | AUC      | 0.099       | 0.072  | 0.059     | 0.102  | 0.032    | 0.007    | 0.030     | 0.003     | 0.015       | -0.019      | 0.021     | 0.090     | -0.005     | -0.007     | 0.035             | 0.018             | 0.021             | 0.003             | 0.014             | 0.008             |
|               |          | ±0.037      | ±0.020 | ±0.019    | ±0.039 | ±0.026   | ±0.018   | ±0.023    | ±0.015    | ±0.011      | ±0.019      | ±0.016    | ±0.064    | ±0.012     | ±0.022     | ±0.018            | ±0.026            | ±0.015            | ±0.013            | ±0.018            | ±0.013            |
|               | BAcc     | 0.114       | 0.083  | 0.059     | 0.121  | 0.045    | -0.002   | 0.041     | 0.005     | 0.020       | -0.003      | 0.016     | 0.091     | 0.001      | 0.003      | 0.054             | 0.030             | 0.030             | 0.016             | 0.032             | 0.018             |
|               |          | ±0.079      | ±0.051 | ±0.042    | ±0.084 | ±0.047   | ±0.021   | ±0.038    | ±0.017    | ±0.020      | ±0.011      | ±0.019    | ±0.078    | ±0.004     | ±0.013     | ±0.028            | ±0.038            | ±0.020            | ±0.024            | ±0.020            | ±0.024            |
|               | Acc_1    | 0.113       | 0.083  | 0.059     | 0.121  | 0.045    | -0.003   | 0.041     | 0.004     | 0.020       | -0.005      | 0.015     | 0.090     | -0.000     | 0.003      | 0.054             | 0.030             | 0.031             | 0.017             | 0.033             | 0.016             |
|               |          | ±0.080      | ±0.051 | ±0.042    | ±0.085 | ±0.048   | ±0.021   | ±0.039    | ±0.017    | ±0.020      | ±0.012      | ±0.018    | ±0.077    | ±0.006     | ±0.014     | ±0.028            | ±0.038            | ±0.022            | ±0.024            | ±0.019            | ±0.025            |
|               | Acc_2    | 0.126       | 0.086  | 0.083     | 0.130  | 0.048    | -0.004   | 0.037     | 0.001     | 0.017       | -0.007      | 0.023     | 0.116     | 0.000      | -0.005     | 0.059             | 0.032             | 0.041             | 0.010             | 0.043             | 0.029             |
|               |          | ±0.069      | ±0.052 | ±0.033    | ±0.070 | ±0.042   | ±0.021   | ±0.035    | ±0.023    | ±0.022      | ±0.011      | ±0.027    | ±0.088    | ±0.011     | ±0.019     | ±0.028            | ±0.056            | ±0.030            | ±0.031            | ±0.026            | ±0.036            |
| sub6          | $\kappa$ | 0.161       | 0.116  | 0.111     | 0.166  | 0.034    | 0.006    | 0.052     | 0.009     | 0.005       | -0.013      | 0.013     | 0.095     | -0.006     | -0.007     | 0.081             | 0.041             | 0.069             | 0.025             | 0.084             | 0.054             |
|               |          | ±0.079      | ±0.064 | ±0.068    | ±0.080 | ±0.062   | ±0.027   | ±0.048    | ±0.017    | ±0.026      | ±0.016      | ±0.031    | ±0.095    | ±0.022     | ±0.023     | ±0.033            | ±0.060            | ±0.041            | ±0.037            | ±0.031            | ±0.035            |
|               | AUC      | 0.131       | 0.103  | 0.089     | 0.137  | 0.023    | 0.000    | 0.035     | -0.001    | 0.004       | -0.030      | 0.010     | 0.085     | -0.006     | -0.008     | 0.068             | 0.033             | 0.056             | 0.018             | 0.057             | 0.023             |
|               |          | ±0.033      | ±0.036 | ±0.027    | ±0.030 | ±0.038   | ±0.019   | ±0.023    | ±0.013    | ±0.013      | ±0.031      | ±0.013    | ±0.063    | ±0.023     | ±0.017     | ±0.029            | ±0.036            | ±0.027            | ±0.022            | ±0.025            | ±0.020            |
|               | BAcc     | 0.138       | 0.100  | 0.095     | 0.142  | 0.029    | 0.005    | 0.045     | 0.007     | 0.004       | -0.011      | 0.012     | 0.081     | -0.005     | -0.006     | 0.069             | 0.035             | 0.059             | 0.021             | 0.072             | 0.046             |
|               |          | ±0.068      | ±0.055 | ±0.058    | ±0.069 | ±0.053   | ±0.023   | ±0.041    | ±0.015    | ±0.023      | ±0.013      | ±0.026    | ±0.081    | ±0.019     | ±0.019     | ±0.028            | ±0.052            | ±0.035            | ±0.031            | ±0.026            | ±0.030            |
|               | Acc_1    | 0.138       | 0.100  | 0.095     | 0.142  | 0.029    | 0.005    | 0.045     | 0.008     | 0.004       | -0.011      | 0.011     | 0.080     | -0.001     | -0.006     | 0.069             | 0.035             | 0.059             | 0.022             | 0.073             | 0.046             |
|               |          | ±0.068      | ±0.055 | ±0.058    | ±0.069 | ±0.053   | ±0.023   | ±0.041    | ±0.015    | ±0.023      | ±0.014      | ±0.028    | ±0.082    | ±0.020     | ±0.019     | ±0.028            | ±0.051            | ±0.035            | ±0.032            | ±0.028            | ±0.030            |
|               | Acc_2    | 0.163       | 0.128  | 0.119     | 0.175  | 0.050    | 0.004    | 0.051     | -0.002    | 0.006       | -0.014      | 0.008     | 0.106     | 0.007      | -0.005     | 0.099             | 0.040             | 0.082             | 0.034             | 0.095             | 0.051             |
|               |          | ±0.068      | ±0.063 | ±0.048    | ±0.043 | ±0.054   | ±0.017   | ±0.044    | ±0.025    | ±0.023      | ±0.014      | ±0.023    | ±0.088    | ±0.026     | ±0.022     | ±0.035            | ±0.043            | ±0.039            | ±0.035            | ±0.037            | ±0.046            |
|               | $\kappa$ | 0.112       | 0.078  | 0.065     | 0.113  | 0.055    | -0.002   | 0.052     | 0.000     | 0.030       | -0.012      | 0.020     | 0.102     | 0.007      | -0.012     | 0.057             | 0.040             | 0.035             | 0.029             | 0.056             | 0.042             |
|               |          | ±0.097      | ±0.075 | ±0.062    | ±0.094 | ±0.037   | ±0.014   | ±0.035    | ±0.024    | ±0.037      | ±0.013      | ±0.034    | ±0.088    | ±0.015     | ±0.016     | ±0.050            | ±0.058            | ±0.026            | ±0.034            | ±0.035            | ±0.037            |
|               | AUC      | 0.075       | 0.056  | 0.056     | 0.086  | 0.038    | 0.010    | 0.027     | -0.002    | 0.022       | -0.027      | 0.006     | 0.109     | 0.010      | -0.007     | 0.027             | 0.027             | 0.012             | 0.017             | 0.022             | 0.018             |
|               |          | ±0.030      | ±0.025 | ±0.023    | ±0.039 | ±0.029   | ±0.026   | ±0.023    | ±0.013    | ±0.023      | ±0.023      | ±0.015    | ±0.056    | ±0.010     | ±0.026     | ±0.021            | ±0.030            | ±0.017            | ±0.017            | ±0.018            | ±0.019            |
|               | BAcc     | 0.096       | 0.067  | 0.056     | 0.097  | 0.047    | -0.001   | 0.045     | 0.000     | 0.026       | -0.010      | 0.018     | 0.087     | 0.006      | -0.010     | 0.048             | 0.034             | 0.030             | 0.025             | 0.048             | 0.036             |
|               |          | ±0.083      | ±0.064 | ±0.054    | ±0.081 | ±0.031   | ±0.012   | ±0.030    | ±0.020    | ±0.032      | ±0.011      | ±0.029    | ±0.076    | ±0.013     | ±0.013     | ±0.042            | ±0.050            | ±0.022            | ±0.029            | ±0.030            | ±0.031            |

Continued on next page

| SubjectMetric |        | DeepConvnet | EEGNet | Conformer | CTNet  | BIOT (f) | BIOT (l) | BENDR (f) | BENDR (l) | CBraMod (f) | CBraMod (l) | EEGPT (f) | EEGPT (l) | LaBraM (f) | LaBraM (l) | STEEGformer-s (f) | STEEGformer-s (l) | STEEGformer-b (f) | STEEGformer-b (l) | STEEGformer-l (f) | STEEGformer-l (l) |
|---------------|--------|-------------|--------|-----------|--------|----------|----------|-----------|-----------|-------------|-------------|-----------|-----------|------------|------------|-------------------|-------------------|-------------------|-------------------|-------------------|-------------------|
| Acc.1         |        | 0.096       | 0.067  | 0.056     | 0.097  | 0.047    | -0.001   | 0.045     | -0.000    | 0.026       | -0.009      | 0.014     | 0.087     | 0.004      | -0.009     | 0.048             | 0.034             | 0.030             | 0.025             | 0.049             | 0.036             |
|               |        | ±0.083      | ±0.064 | ±0.054    | ±0.081 | ±0.031   | ±0.012   | ±0.030    | ±0.020    | ±0.032      | ±0.010      | ±0.028    | ±0.077    | ±0.012     | ±0.014     | ±0.042            | ±0.050            | ±0.022            | ±0.029            | ±0.029            | ±0.032            |
|               |        | 0.099       | 0.066  | 0.060     | 0.108  | 0.052    | 0.005    | 0.033     | -0.002    | 0.025       | -0.016      | 0.008     | 0.142     | 0.006      | -0.011     | 0.050             | 0.033             | 0.034             | 0.029             | 0.047             | 0.033             |
| Acc.2         |        | ±0.071      | ±0.051 | ±0.037    | ±0.073 | ±0.038   | ±0.025   | ±0.031    | ±0.018    | ±0.046      | ±0.016      | ±0.031    | ±0.081    | ±0.013     | ±0.027     | ±0.034            | ±0.062            | ±0.022            | ±0.046            | ±0.030            | ±0.045            |
| sub8          | κ      | 0.164       | 0.114  | 0.115     | 0.185  | 0.054    | 0.011    | 0.040     | 0.007     | 0.031       | -0.006      | 0.025     | 0.120     | 0.004      | 0.005      | 0.091             | 0.034             | 0.054             | 0.033             | 0.071             | 0.029             |
|               |        | ±0.092      | ±0.063 | ±0.088    | ±0.099 | ±0.053   | ±0.037   | ±0.040    | ±0.023    | ±0.031      | ±0.012      | ±0.032    | ±0.074    | ±0.020     | ±0.019     | ±0.041            | ±0.044            | ±0.032            | ±0.044            | ±0.036            | ±0.037            |
|               | AUC    | 0.129       | 0.102  | 0.091     | 0.150  | 0.041    | 0.034    | 0.037     | 0.011     | 0.017       | -0.025      | 0.020     | 0.119     | 0.019      | 0.001      | 0.050             | 0.036             | 0.033             | 0.016             | 0.037             | 0.023             |
|               |        | ±0.034      | ±0.022 | ±0.021    | ±0.037 | ±0.042   | ±0.030   | ±0.026    | ±0.011    | ±0.010      | ±0.023      | ±0.013    | ±0.057    | ±0.019     | ±0.028     | ±0.022            | ±0.028            | ±0.020            | ±0.012            | ±0.021            | ±0.014            |
|               | BAcc   | 0.140       | 0.098  | 0.099     | 0.159  | 0.046    | 0.009    | 0.035     | 0.006     | 0.026       | -0.005      | 0.022     | 0.103     | 0.003      | 0.004      | 0.078             | 0.029             | 0.047             | 0.028             | 0.061             | 0.025             |
|               |        | ±0.079      | ±0.054 | ±0.075    | ±0.085 | ±0.045   | ±0.032   | ±0.034    | ±0.019    | ±0.026      | ±0.010      | ±0.028    | ±0.064    | ±0.017     | ±0.016     | ±0.035            | ±0.037            | ±0.027            | ±0.038            | ±0.031            | ±0.032            |
|               | Acc.1  | 0.141       | 0.098  | 0.098     | 0.159  | 0.046    | 0.009    | 0.034     | 0.006     | 0.026       | -0.006      | 0.020     | 0.102     | 0.004      | 0.004      | 0.078             | 0.028             | 0.047             | 0.028             | 0.061             | 0.025             |
|               | ±0.079 | ±0.054      | ±0.075 | ±0.085    | ±0.045 | ±0.032   | ±0.034   | ±0.019    | ±0.026    | ±0.010      | ±0.029      | ±0.064    | ±0.018    | ±0.017     | ±0.035     | ±0.038            | ±0.027            | ±0.037            | ±0.031            | ±0.032            |                   |
| Acc.2         | 0.161  | 0.123       | 0.118  | 0.188     | 0.053  | 0.022    | 0.047    | 0.007     | 0.031     | -0.008      | 0.020       | 0.132     | 0.016     | 0.003      | 0.088      | 0.037             | 0.070             | 0.039             | 0.077             | 0.036             |                   |
|               | ±0.062 | ±0.043      | ±0.050 | ±0.071    | ±0.064 | ±0.036   | ±0.039   | ±0.023    | ±0.028    | ±0.009      | ±0.027      | ±0.086    | ±0.028    | ±0.023     | ±0.042     | ±0.051            | ±0.033            | ±0.034            | ±0.039            | ±0.046            |                   |
| sub9          | κ      | 0.173       | 0.139  | 0.135     | 0.172  | 0.046    | 0.011    | 0.074     | 0.015     | 0.011       | -0.010      | 0.021     | 0.123     | 0.013      | 0.003      | 0.077             | 0.057             | 0.065             | 0.055             | 0.076             | 0.038             |
|               |        | ±0.111      | ±0.092 | ±0.062    | ±0.108 | ±0.060   | ±0.021   | ±0.045    | ±0.026    | ±0.018      | ±0.014      | ±0.042    | ±0.075    | ±0.014     | ±0.013     | ±0.026            | ±0.048            | ±0.030            | ±0.029            | ±0.031            | ±0.040            |
|               | AUC    | 0.131       | 0.114  | 0.107     | 0.136  | 0.042    | 0.020    | 0.053     | 0.020     | 0.006       | -0.020      | 0.023     | 0.125     | 0.017      | -0.000     | 0.051             | 0.039             | 0.038             | 0.019             | 0.033             | 0.025             |
|               |        | ±0.039      | ±0.029 | ±0.024    | ±0.038 | ±0.055   | ±0.024   | ±0.024    | ±0.016    | ±0.008      | ±0.023      | ±0.018    | ±0.057    | ±0.008     | ±0.021     | ±0.021            | ±0.027            | ±0.019            | ±0.017            | ±0.019            | ±0.014            |
|               | BAcc   | 0.148       | 0.119  | 0.116     | 0.147  | 0.040    | 0.009    | 0.063     | 0.013     | 0.010       | -0.008      | 0.018     | 0.106     | 0.011      | 0.003      | 0.066             | 0.049             | 0.055             | 0.047             | 0.065             | 0.032             |
|               |        | ±0.095      | ±0.079 | ±0.053    | ±0.093 | ±0.052   | ±0.018   | ±0.039    | ±0.022    | ±0.016      | ±0.012      | ±0.036    | ±0.064    | ±0.012     | ±0.012     | ±0.023            | ±0.041            | ±0.026            | ±0.025            | ±0.027            | ±0.034            |
|               | Acc.1  | 0.148       | 0.119  | 0.116     | 0.147  | 0.038    | 0.009    | 0.064     | 0.013     | 0.008       | -0.009      | 0.019     | 0.105     | 0.010      | 0.003      | 0.066             | 0.049             | 0.055             | 0.047             | 0.067             | 0.033             |
|               | ±0.095 | ±0.079      | ±0.053 | ±0.092    | ±0.051 | ±0.018   | ±0.039   | ±0.022    | ±0.017    | ±0.013      | ±0.037      | ±0.066    | ±0.014    | ±0.011     | ±0.023     | ±0.042            | ±0.026            | ±0.024            | ±0.027            | ±0.036            |                   |
| Acc.2         | 0.184  | 0.158       | 0.144  | 0.194     | 0.060  | 0.022    | 0.081    | 0.015     | 0.011     | -0.012      | 0.035       | 0.138     | 0.021     | -0.003     | 0.089      | 0.046             | 0.071             | 0.051             | 0.074             | 0.054             |                   |
|               | ±0.078 | ±0.055      | ±0.037 | ±0.067    | ±0.070 | ±0.029   | ±0.034   | ±0.022    | ±0.015    | ±0.013      | ±0.038      | ±0.076    | ±0.012    | ±0.015     | ±0.039     | ±0.044            | ±0.035            | ±0.057            | ±0.038            | ±0.047            |                   |



## D 7-MOVEMENT UPPER LIMB MOTOR IMAGERY CLASSIFICATION

### D.1 POPULATION-LEVEL RESULTS

Table 27: Average Performance Metrics Across All Subjects of Population-Trained Models

| Model (Training strategy) | $\kappa$     | AUC          | BAcc         | Acc.1        | Acc.2        |
|---------------------------|--------------|--------------|--------------|--------------|--------------|
|                           | 0.141        | 0.648        | 0.264        | 0.264        | 0.443        |
| <b>DeepConvnet</b>        | $\pm 0.046$  | $\pm 0.029$  | $\pm 0.040$  | $\pm 0.040$  | $\pm 0.038$  |
|                           | 0.122        | 0.634        | 0.248        | 0.248        | 0.426        |
| <b>EEGNet</b>             | $\pm 0.027$  | $\pm 0.024$  | $\pm 0.023$  | $\pm 0.023$  | $\pm 0.029$  |
|                           | 0.106        | 0.618        | 0.234        | 0.234        | 0.413        |
| <b>Conformer</b>          | $\pm 0.024$  | $\pm 0.020$  | $\pm 0.021$  | $\pm 0.021$  | $\pm 0.026$  |
|                           | 0.143        | <b>0.656</b> | 0.265        | 0.265        | 0.450        |
| <b>CTNet</b>              | $\pm 0.040$  | $\pm 0.027$  | $\pm 0.034$  | $\pm 0.034$  | $\pm 0.037$  |
|                           | 0.015        | 0.510        | 0.156        | 0.156        | 0.296        |
| <b>BIOT (f)</b>           | $\pm 0.027$  | $\pm 0.019$  | $\pm 0.023$  | $\pm 0.023$  | $\pm 0.023$  |
|                           | -0.011       | 0.485        | 0.133        | 0.133        | 0.267        |
| <b>BIOT (l)</b>           | $\pm 0.017$  | $\pm 0.021$  | $\pm 0.014$  | $\pm 0.014$  | $\pm 0.019$  |
|                           | 0.055        | 0.559        | 0.190        | 0.190        | 0.355        |
| <b>BENDR (f)</b>          | $\pm 0.026$  | $\pm 0.020$  | $\pm 0.023$  | $\pm 0.023$  | $\pm 0.026$  |
|                           | 0.020        | 0.520        | 0.160        | 0.160        | 0.312        |
| <b>BENDR (l)</b>          | $\pm 0.020$  | $\pm 0.015$  | $\pm 0.017$  | $\pm 0.017$  | $\pm 0.023$  |
|                           | -0.016       | 0.476        | 0.130        | 0.130        | 0.266        |
| <b>CBraMod (f)</b>        | $\pm 0.022$  | $\pm 0.019$  | $\pm 0.019$  | $\pm 0.019$  | $\pm 0.024$  |
|                           | -0.008       | 0.474        | 0.136        | 0.136        | 0.277        |
| <b>CBraMod (l)</b>        | $\pm 0.018$  | $\pm 0.032$  | $\pm 0.015$  | $\pm 0.015$  | $\pm 0.021$  |
|                           | 0.036        | 0.535        | 0.174        | 0.174        | 0.325        |
| <b>EEGPT (f)</b>          | $\pm 0.021$  | $\pm 0.015$  | $\pm 0.018$  | $\pm 0.018$  | $\pm 0.022$  |
|                           | 0.049        | 0.549        | 0.184        | 0.184        | 0.336        |
| <b>EEGPT (l)</b>          | $\pm 0.019$  | $\pm 0.021$  | $\pm 0.016$  | $\pm 0.016$  | $\pm 0.027$  |
|                           | 0.001        | 0.498        | 0.143        | 0.141        | 0.285        |
| <b>LaBraM (f)</b>         | $\pm 0.004$  | $\pm 0.005$  | $\pm 0.003$  | $\pm 0.005$  | $\pm 0.003$  |
|                           | -0.007       | 0.482        | 0.137        | 0.137        | 0.269        |
| <b>LaBraM (l)</b>         | $\pm 0.018$  | $\pm 0.023$  | $\pm 0.016$  | $\pm 0.015$  | $\pm 0.024$  |
|                           | <b>0.162</b> | 0.637        | <b>0.281</b> | <b>0.281</b> | <b>0.467</b> |
| <b>STEEGformer-s (f)</b>  | $\pm 0.039$  | $\pm 0.030$  | $\pm 0.033$  | $\pm 0.033$  | $\pm 0.043$  |
|                           | 0.023        | 0.532        | 0.163        | 0.163        | 0.317        |
| <b>STEEGformer-s (l)</b>  | $\pm 0.021$  | $\pm 0.015$  | $\pm 0.018$  | $\pm 0.018$  | $\pm 0.028$  |
|                           | 0.148        | 0.633        | 0.270        | 0.270        | 0.455        |
| <b>STEEGformer-b (f)</b>  | $\pm 0.045$  | $\pm 0.031$  | $\pm 0.038$  | $\pm 0.040$  | $\pm 0.046$  |
|                           | 0.042        | 0.539        | 0.179        | 0.179        | 0.331        |
| <b>STEEGformer-b (l)</b>  | $\pm 0.028$  | $\pm 0.024$  | $\pm 0.024$  | $\pm 0.025$  | $\pm 0.033$  |
|                           | 0.223        | 0.677        | 0.334        | 0.336        | 0.524        |
| <b>STEEGformer-l (f)</b>  | $\pm 0.035$  | $\pm 0.023$  | $\pm 0.030$  | $\pm 0.029$  | $\pm 0.043$  |
|                           | 0.031        | 0.545        | 0.170        | 0.169        | 0.320        |
| <b>STEEGformer-l (l)</b>  | $\pm 0.031$  | $\pm 0.023$  | $\pm 0.027$  | $\pm 0.026$  | $\pm 0.024$  |

Table 28: Per-Subject Performance Metrics of Population-Trained Models

| Subject | Metric           | DeepConvnet                 | EEGNet               | Conformer            | CTNet                       | BIOT (f)             | BIOT (l)              | BENDR (f)             | BENDR (l)            | CBraMod (f)           | CBraMod (l)           | EEGPT (f)            | EEGPT (l)            | LaBraM (f)            | LaBraM (l)            | STEEGformer-s (f)           | STEEGformer-s (l)    | STEEGformer-b (f)    | STEEGformer-b (l)    | STEEGformer-l (f)           | STEEGformer-l (l)    |
|---------|------------------|-----------------------------|----------------------|----------------------|-----------------------------|----------------------|-----------------------|-----------------------|----------------------|-----------------------|-----------------------|----------------------|----------------------|-----------------------|-----------------------|-----------------------------|----------------------|----------------------|----------------------|-----------------------------|----------------------|
| sub1    | $\kappa$         | 0.119<br>$\pm 0.055$        | 0.131<br>$\pm 0.021$ | 0.089<br>$\pm 0.054$ | <b>0.158</b><br>$\pm 0.046$ | 0.033<br>$\pm 0.032$ | 0.006<br>$\pm 0.021$  | 0.036<br>$\pm 0.063$  | 0.050<br>$\pm 0.038$ | -0.028<br>$\pm 0.040$ | 0.000<br>$\pm 0.000$  | 0.061<br>$\pm 0.040$ | 0.058<br>$\pm 0.039$ | -0.006<br>$\pm 0.012$ | -0.028<br>$\pm 0.023$ | 0.128<br>$\pm 0.049$        | 0.025<br>$\pm 0.032$ | 0.147<br>$\pm 0.038$ | 0.064<br>$\pm 0.056$ | 0.222<br>$\pm 0.056$        | 0.117<br>$\pm 0.049$ |
|         | AUC              | 0.626<br>$\pm 0.033$        | 0.642<br>$\pm 0.017$ | 0.609<br>$\pm 0.027$ | <b>0.650</b><br>$\pm 0.024$ | 0.529<br>$\pm 0.011$ | 0.502<br>$\pm 0.021$  | 0.554<br>$\pm 0.051$  | 0.532<br>$\pm 0.035$ | 0.476<br>$\pm 0.048$  | 0.447<br>$\pm 0.037$  | 0.547<br>$\pm 0.033$ | 0.558<br>$\pm 0.019$ | 0.498<br>$\pm 0.004$  | 0.467<br>$\pm 0.020$  | 0.624<br>$\pm 0.036$        | 0.551<br>$\pm 0.028$ | 0.643<br>$\pm 0.048$ | 0.571<br>$\pm 0.041$ | 0.670<br>$\pm 0.042$        | 0.604<br>$\pm 0.033$ |
|         | BAcc             | 0.245<br>$\pm 0.047$        | 0.255<br>$\pm 0.018$ | 0.219<br>$\pm 0.047$ | <b>0.279</b><br>$\pm 0.039$ | 0.171<br>$\pm 0.027$ | 0.148<br>$\pm 0.018$  | 0.174<br>$\pm 0.054$  | 0.186<br>$\pm 0.032$ | 0.119<br>$\pm 0.035$  | 0.143<br>$\pm 0.000$  | 0.195<br>$\pm 0.034$ | 0.193<br>$\pm 0.033$ | 0.138<br>$\pm 0.010$  | 0.119<br>$\pm 0.019$  | 0.252<br>$\pm 0.042$        | 0.164<br>$\pm 0.027$ | 0.269<br>$\pm 0.032$ | 0.198<br>$\pm 0.048$ | 0.333<br>$\pm 0.048$        | 0.243<br>$\pm 0.042$ |
|         | Acc <sub>1</sub> | 0.245<br>$\pm 0.047$        | 0.255<br>$\pm 0.018$ | 0.219<br>$\pm 0.047$ | <b>0.279</b><br>$\pm 0.039$ | 0.171<br>$\pm 0.027$ | 0.148<br>$\pm 0.018$  | 0.174<br>$\pm 0.054$  | 0.186<br>$\pm 0.032$ | 0.119<br>$\pm 0.035$  | 0.140<br>$\pm 0.005$  | 0.195<br>$\pm 0.034$ | 0.193<br>$\pm 0.033$ | 0.143<br>$\pm 0.000$  | 0.119<br>$\pm 0.019$  | 0.252<br>$\pm 0.042$        | 0.164<br>$\pm 0.027$ | 0.258<br>$\pm 0.025$ | 0.192<br>$\pm 0.045$ | 0.338<br>$\pm 0.055$        | 0.244<br>$\pm 0.046$ |
|         | Acc <sub>2</sub> | 0.407<br>$\pm 0.036$        | 0.438<br>$\pm 0.037$ | 0.383<br>$\pm 0.042$ | <b>0.452</b><br>$\pm 0.040$ | 0.319<br>$\pm 0.033$ | 0.305<br>$\pm 0.054$  | 0.329<br>$\pm 0.048$  | 0.348<br>$\pm 0.057$ | 0.257<br>$\pm 0.077$  | 0.298<br>$\pm 0.012$  | 0.319<br>$\pm 0.028$ | 0.360<br>$\pm 0.010$ | 0.281<br>$\pm 0.010$  | 0.276<br>$\pm 0.039$  | 0.431<br>$\pm 0.051$        | 0.371<br>$\pm 0.031$ | 0.448<br>$\pm 0.056$ | 0.348<br>$\pm 0.070$ | 0.484<br>$\pm 0.056$        | 0.382<br>$\pm 0.039$ |
| sub10   | $\kappa$         | 0.094<br>$\pm 0.045$        | 0.114<br>$\pm 0.039$ | 0.128<br>$\pm 0.058$ | 0.119<br>$\pm 0.032$        | 0.042<br>$\pm 0.028$ | -0.000<br>$\pm 0.029$ | 0.053<br>$\pm 0.073$  | 0.008<br>$\pm 0.058$ | -0.022<br>$\pm 0.027$ | -0.056<br>$\pm 0.037$ | 0.025<br>$\pm 0.050$ | 0.033<br>$\pm 0.050$ | 0.000<br>$\pm 0.000$  | -0.022<br>$\pm 0.042$ | <b>0.133</b><br>$\pm 0.036$ | 0.008<br>$\pm 0.046$ | 0.097<br>$\pm 0.026$ | 0.031<br>$\pm 0.062$ | 0.153<br>$\pm 0.039$        | 0.069<br>$\pm 0.079$ |
|         | AUC              | 0.621<br>$\pm 0.043$        | 0.614<br>$\pm 0.039$ | 0.605<br>$\pm 0.049$ | <b>0.622</b><br>$\pm 0.019$ | 0.519<br>$\pm 0.018$ | 0.501<br>$\pm 0.043$  | 0.558<br>$\pm 0.037$  | 0.507<br>$\pm 0.029$ | 0.461<br>$\pm 0.056$  | 0.461<br>$\pm 0.020$  | 0.520<br>$\pm 0.036$ | 0.524<br>$\pm 0.031$ | 0.493<br>$\pm 0.015$  | 0.482<br>$\pm 0.034$  | 0.620<br>$\pm 0.026$        | 0.526<br>$\pm 0.055$ | 0.593<br>$\pm 0.045$ | 0.543<br>$\pm 0.055$ | 0.640<br>$\pm 0.042$        | 0.552<br>$\pm 0.027$ |
|         | BAcc             | 0.224<br>$\pm 0.039$        | 0.240<br>$\pm 0.033$ | 0.252<br>$\pm 0.049$ | 0.245<br>$\pm 0.027$        | 0.179<br>$\pm 0.024$ | 0.143<br>$\pm 0.025$  | 0.188<br>$\pm 0.063$  | 0.150<br>$\pm 0.050$ | 0.124<br>$\pm 0.023$  | 0.095<br>$\pm 0.031$  | 0.164<br>$\pm 0.043$ | 0.171<br>$\pm 0.043$ | 0.143<br>$\pm 0.000$  | 0.124<br>$\pm 0.036$  | <b>0.257</b><br>$\pm 0.031$ | 0.150<br>$\pm 0.039$ | 0.226<br>$\pm 0.022$ | 0.169<br>$\pm 0.053$ | 0.274<br>$\pm 0.034$        | 0.202<br>$\pm 0.067$ |
|         | Acc <sub>1</sub> | 0.224<br>$\pm 0.039$        | 0.240<br>$\pm 0.033$ | 0.252<br>$\pm 0.049$ | 0.245<br>$\pm 0.027$        | 0.179<br>$\pm 0.024$ | 0.143<br>$\pm 0.025$  | 0.188<br>$\pm 0.063$  | 0.150<br>$\pm 0.050$ | 0.124<br>$\pm 0.023$  | 0.093<br>$\pm 0.031$  | 0.164<br>$\pm 0.043$ | 0.171<br>$\pm 0.043$ | 0.131<br>$\pm 0.025$  | 0.124<br>$\pm 0.036$  | <b>0.257</b><br>$\pm 0.031$ | 0.150<br>$\pm 0.039$ | 0.222<br>$\pm 0.031$ | 0.172<br>$\pm 0.048$ | 0.273<br>$\pm 0.046$        | 0.204<br>$\pm 0.071$ |
|         | Acc <sub>2</sub> | 0.429<br>$\pm 0.045$        | 0.419<br>$\pm 0.071$ | 0.400<br>$\pm 0.080$ | 0.400<br>$\pm 0.050$        | 0.314<br>$\pm 0.027$ | 0.288<br>$\pm 0.031$  | 0.355<br>$\pm 0.070$  | 0.295<br>$\pm 0.046$ | 0.238<br>$\pm 0.040$  | 0.243<br>$\pm 0.038$  | 0.319<br>$\pm 0.036$ | 0.319<br>$\pm 0.050$ | 0.286<br>$\pm 0.000$  | 0.233<br>$\pm 0.051$  | 0.448<br>$\pm 0.038$        | 0.312<br>$\pm 0.049$ | 0.395<br>$\pm 0.101$ | 0.322<br>$\pm 0.082$ | <b>0.447</b><br>$\pm 0.036$ | 0.335<br>$\pm 0.076$ |
| sub11   | $\kappa$         | <b>0.183</b><br>$\pm 0.018$ | 0.153<br>$\pm 0.043$ | 0.100<br>$\pm 0.057$ | 0.131<br>$\pm 0.021$        | 0.031<br>$\pm 0.036$ | -0.042<br>$\pm 0.042$ | -0.008<br>$\pm 0.029$ | 0.017<br>$\pm 0.043$ | -0.011<br>$\pm 0.049$ | 0.003<br>$\pm 0.006$  | 0.025<br>$\pm 0.054$ | 0.069<br>$\pm 0.049$ | 0.008<br>$\pm 0.018$  | -0.028<br>$\pm 0.023$ | 0.156<br>$\pm 0.046$        | 0.044<br>$\pm 0.086$ | 0.103<br>$\pm 0.051$ | 0.022<br>$\pm 0.042$ | 0.203<br>$\pm 0.064$        | 0.003<br>$\pm 0.021$ |
|         | AUC              | 0.627<br>$\pm 0.020$        | 0.627<br>$\pm 0.030$ | 0.618<br>$\pm 0.021$ | <b>0.638</b><br>$\pm 0.029$ | 0.517<br>$\pm 0.022$ | 0.443<br>$\pm 0.054$  | 0.504<br>$\pm 0.030$  | 0.505<br>$\pm 0.034$ | 0.476<br>$\pm 0.047$  | 0.454<br>$\pm 0.035$  | 0.527<br>$\pm 0.033$ | 0.581<br>$\pm 0.035$ | 0.505<br>$\pm 0.011$  | 0.493<br>$\pm 0.025$  | 0.605<br>$\pm 0.045$        | 0.532<br>$\pm 0.029$ | 0.590<br>$\pm 0.028$ | 0.528<br>$\pm 0.022$ | 0.655<br>$\pm 0.045$        | 0.531<br>$\pm 0.008$ |
|         | BAcc             | <b>0.300</b><br>$\pm 0.016$ | 0.274<br>$\pm 0.037$ | 0.229<br>$\pm 0.049$ | 0.255<br>$\pm 0.018$        | 0.169<br>$\pm 0.031$ | 0.107<br>$\pm 0.036$  | 0.136<br>$\pm 0.025$  | 0.157<br>$\pm 0.037$ | 0.133<br>$\pm 0.042$  | 0.145<br>$\pm 0.005$  | 0.164<br>$\pm 0.046$ | 0.202<br>$\pm 0.042$ | 0.150<br>$\pm 0.015$  | 0.119<br>$\pm 0.019$  | 0.276<br>$\pm 0.040$        | 0.181<br>$\pm 0.074$ | 0.231<br>$\pm 0.043$ | 0.162<br>$\pm 0.036$ | 0.317<br>$\pm 0.055$        | 0.145<br>$\pm 0.018$ |
|         | Acc <sub>1</sub> | <b>0.300</b><br>$\pm 0.016$ | 0.274<br>$\pm 0.037$ | 0.229<br>$\pm 0.049$ | 0.255<br>$\pm 0.018$        | 0.169<br>$\pm 0.031$ | 0.107<br>$\pm 0.036$  | 0.136<br>$\pm 0.025$  | 0.157<br>$\pm 0.037$ | 0.136<br>$\pm 0.039$  | 0.150<br>$\pm 0.016$  | 0.164<br>$\pm 0.046$ | 0.202<br>$\pm 0.042$ | 0.143<br>$\pm 0.000$  | 0.117<br>$\pm 0.020$  | 0.276<br>$\pm 0.040$        | 0.181<br>$\pm 0.074$ | 0.221<br>$\pm 0.041$ | 0.166<br>$\pm 0.044$ | 0.313<br>$\pm 0.057$        | 0.146<br>$\pm 0.020$ |
|         | Acc <sub>2</sub> | <b>0.300</b><br>$\pm 0.016$ | 0.274<br>$\pm 0.037$ | 0.229<br>$\pm 0.049$ | 0.255<br>$\pm 0.018$        | 0.169<br>$\pm 0.031$ | 0.107<br>$\pm 0.036$  | 0.136<br>$\pm 0.025$  | 0.157<br>$\pm 0.037$ | 0.136<br>$\pm 0.039$  | 0.150<br>$\pm 0.016$  | 0.164<br>$\pm 0.046$ | 0.202<br>$\pm 0.042$ | 0.143<br>$\pm 0.000$  | 0.117<br>$\pm 0.020$  | 0.276<br>$\pm 0.040$        | 0.181<br>$\pm 0.074$ | 0.221<br>$\pm 0.041$ | 0.166<br>$\pm 0.044$ | 0.313<br>$\pm 0.057$        | 0.146<br>$\pm 0.020$ |

Continued on next page

| SubjectMetric |          | DeepConvnet             | EEGNet           | Conformer        | CTNet            | BIOT (f)          | BIOT (l)          | BENDR (f)        | BENDR (l)         | CBraMod (f)       | CBraMod (l)       | EEGPT (f)        | EEGPT (l)         | LaBraM (f)       | LaBraM (l)        | STEEGformer-s (f)       | STEEGformer-s (l) | STEEGformer-b (f) | STEEGformer-b (l) | STEEGformer-h (f) | STEEGformer-h (l) |
|---------------|----------|-------------------------|------------------|------------------|------------------|-------------------|-------------------|------------------|-------------------|-------------------|-------------------|------------------|-------------------|------------------|-------------------|-------------------------|-------------------|-------------------|-------------------|-------------------|-------------------|
| sub12         | Acc.2    | <b>0.445</b><br>± 0.041 | 0.433<br>± 0.050 | 0.414<br>± 0.026 | 0.436<br>± 0.041 | 0.288<br>± 0.031  | 0.236<br>± 0.055  | 0.295<br>± 0.042 | 0.298<br>± 0.056  | 0.248<br>± 0.058  | 0.288<br>± 0.005  | 0.326<br>± 0.038 | 0.371<br>± 0.079  | 0.286<br>± 0.000 | 0.255<br>± 0.043  | 0.426<br>± 0.052        | 0.310<br>± 0.054  | 0.375<br>± 0.036  | 0.313<br>± 0.047  | 0.479<br>± 0.080  | 0.325<br>± 0.052  |
|               | $\kappa$ | 0.144<br>± 0.066        | 0.106<br>± 0.043 | 0.097<br>± 0.040 | 0.119<br>± 0.053 | -0.006<br>± 0.063 | -0.031<br>± 0.046 | 0.047<br>± 0.065 | 0.008<br>± 0.025  | -0.025<br>± 0.057 | -0.028<br>± 0.033 | 0.056<br>± 0.035 | 0.033<br>± 0.016  | 0.011<br>± 0.014 | 0.000<br>± 0.031  | <b>0.175</b><br>± 0.030 | 0.042<br>± 0.017  | 0.156<br>± 0.023  | 0.108<br>± 0.039  | 0.247<br>± 0.068  | 0.053<br>± 0.028  |
|               | AUC      | <b>0.656</b><br>± 0.045 | 0.616<br>± 0.024 | 0.609<br>± 0.028 | 0.656<br>± 0.037 | 0.503<br>± 0.033  | 0.452<br>± 0.044  | 0.558<br>± 0.013 | 0.506<br>± 0.019  | 0.470<br>± 0.046  | 0.458<br>± 0.019  | 0.536<br>± 0.032 | 0.541<br>± 0.047  | 0.503<br>± 0.006 | 0.444<br>± 0.057  | 0.654<br>± 0.026        | 0.561<br>± 0.036  | 0.648<br>± 0.034  | 0.569<br>± 0.032  | 0.681<br>± 0.031  | 0.554<br>± 0.029  |
|               | BAcc     | 0.267<br>± 0.056        | 0.233<br>± 0.037 | 0.226<br>± 0.035 | 0.245<br>± 0.045 | 0.138<br>± 0.054  | 0.117<br>± 0.040  | 0.183<br>± 0.056 | 0.150<br>± 0.022  | 0.121<br>± 0.049  | 0.119<br>± 0.028  | 0.190<br>± 0.030 | 0.171<br>± 0.014  | 0.152<br>± 0.012 | 0.143<br>± 0.026  | <b>0.293</b><br>± 0.026 | 0.179<br>± 0.015  | 0.276<br>± 0.020  | 0.236<br>± 0.033  | 0.355<br>± 0.058  | 0.188<br>± 0.024  |
|               | Acc.1    | 0.267<br>± 0.056        | 0.233<br>± 0.037 | 0.226<br>± 0.035 | 0.245<br>± 0.045 | 0.138<br>± 0.054  | 0.117<br>± 0.040  | 0.183<br>± 0.056 | 0.150<br>± 0.022  | 0.121<br>± 0.049  | 0.119<br>± 0.028  | 0.190<br>± 0.030 | 0.171<br>± 0.014  | 0.143<br>± 0.000 | 0.143<br>± 0.026  | <b>0.293</b><br>± 0.026 | 0.176<br>± 0.016  | 0.275<br>± 0.017  | 0.233<br>± 0.031  | 0.355<br>± 0.060  | 0.189<br>± 0.027  |
|               | Acc.2    | 0.445<br>± 0.088        | 0.388<br>± 0.041 | 0.398<br>± 0.032 | 0.438<br>± 0.042 | 0.281<br>± 0.054  | 0.257<br>± 0.056  | 0.357<br>± 0.037 | 0.293<br>± 0.018  | 0.269<br>± 0.060  | 0.271<br>± 0.033  | 0.343<br>± 0.031 | 0.324<br>± 0.031  | 0.286<br>± 0.000 | 0.271<br>± 0.029  | <b>0.483</b><br>± 0.051 | 0.371<br>± 0.064  | 0.472<br>± 0.043  | 0.385<br>± 0.029  | 0.521<br>± 0.058  | 0.344<br>± 0.083  |
| sub13         | $\kappa$ | 0.108<br>± 0.042        | 0.075<br>± 0.038 | 0.061<br>± 0.046 | 0.064<br>± 0.058 | -0.014<br>± 0.010 | 0.014<br>± 0.052  | 0.053<br>± 0.043 | -0.014<br>± 0.043 | -0.053<br>± 0.023 | 0.000<br>± 0.020  | 0.053<br>± 0.065 | 0.056<br>± 0.026  | 0.000<br>± 0.000 | -0.014<br>± 0.024 | <b>0.122</b><br>± 0.060 | 0.003<br>± 0.045  | 0.050<br>± 0.052  | -0.006<br>± 0.053 | 0.147<br>± 0.041  | 0.014<br>± 0.047  |
|               | AUC      | <b>0.620</b><br>± 0.038 | 0.594<br>± 0.069 | 0.599<br>± 0.020 | 0.603<br>± 0.049 | 0.489<br>± 0.033  | 0.501<br>± 0.029  | 0.570<br>± 0.065 | 0.498<br>± 0.022  | 0.481<br>± 0.027  | 0.446<br>± 0.034  | 0.538<br>± 0.035 | 0.570<br>± 0.037  | 0.502<br>± 0.006 | 0.487<br>± 0.034  | 0.585<br>± 0.023        | 0.511<br>± 0.031  | 0.572<br>± 0.030  | 0.503<br>± 0.029  | 0.640<br>± 0.021  | 0.512<br>± 0.010  |
|               | BAcc     | 0.236<br>± 0.036        | 0.207<br>± 0.032 | 0.195<br>± 0.039 | 0.198<br>± 0.050 | 0.131<br>± 0.008  | 0.155<br>± 0.045  | 0.188<br>± 0.037 | 0.131<br>± 0.037  | 0.098<br>± 0.020  | 0.143<br>± 0.017  | 0.188<br>± 0.055 | 0.190<br>± 0.022  | 0.143<br>± 0.000 | 0.131<br>± 0.021  | <b>0.248</b><br>± 0.051 | 0.145<br>± 0.039  | 0.186<br>± 0.044  | 0.138<br>± 0.046  | 0.269<br>± 0.035  | 0.155<br>± 0.040  |
|               | Acc.1    | 0.236<br>± 0.036        | 0.207<br>± 0.032 | 0.195<br>± 0.039 | 0.198<br>± 0.050 | 0.131<br>± 0.008  | 0.155<br>± 0.045  | 0.188<br>± 0.037 | 0.131<br>± 0.037  | 0.098<br>± 0.020  | 0.140<br>± 0.018  | 0.188<br>± 0.055 | 0.190<br>± 0.022  | 0.150<br>± 0.010 | 0.131<br>± 0.021  | <b>0.248</b><br>± 0.051 | 0.145<br>± 0.039  | 0.185<br>± 0.043  | 0.137<br>± 0.046  | 0.273<br>± 0.042  | 0.156<br>± 0.031  |
|               | Acc.2    | 0.393<br>± 0.050        | 0.379<br>± 0.078 | 0.371<br>± 0.055 | 0.386<br>± 0.055 | 0.279<br>± 0.034  | 0.283<br>± 0.041  | 0.371<br>± 0.087 | 0.262<br>± 0.019  | 0.255<br>± 0.029  | 0.288<br>± 0.023  | 0.345<br>± 0.082 | 0.364<br>± 0.036  | 0.286<br>± 0.000 | 0.262<br>± 0.055  | <b>0.395</b><br>± 0.058 | 0.300<br>± 0.010  | 0.364<br>± 0.067  | 0.263<br>± 0.047  | 0.485<br>± 0.064  | 0.290<br>± 0.032  |
|               | $\kappa$ | 0.128<br>± 0.072        | 0.064<br>± 0.078 | 0.092<br>± 0.056 | 0.114<br>± 0.070 | -0.014<br>± 0.017 | -0.008<br>± 0.016 | 0.050<br>± 0.072 | 0.031<br>± 0.060  | -0.025<br>± 0.023 | -0.042<br>± 0.022 | 0.022<br>± 0.053 | -0.008<br>± 0.041 | 0.000<br>± 0.000 | -0.047<br>± 0.038 | <b>0.133</b><br>± 0.066 | 0.019<br>± 0.055  | 0.100<br>± 0.052  | 0.019<br>± 0.047  | 0.211<br>± 0.073  | 0.003<br>± 0.018  |
| sub14         | AUC      | 0.625<br>± 0.038        | 0.605<br>± 0.038 | 0.602<br>± 0.044 | 0.631<br>± 0.051 | 0.502<br>± 0.014  | 0.486<br>± 0.046  | 0.561<br>± 0.041 | 0.519<br>± 0.026  | 0.451<br>± 0.058  | 0.438<br>± 0.014  | 0.508<br>± 0.033 | 0.516<br>± 0.037  | 0.487<br>± 0.027 | 0.434<br>± 0.035  | <b>0.636</b><br>± 0.044 | 0.508<br>± 0.040  | 0.595<br>± 0.046  | 0.521<br>± 0.028  | 0.657<br>± 0.047  | 0.524<br>± 0.039  |
|               | BAcc     | 0.252<br>± 0.062        | 0.198<br>± 0.067 | 0.221<br>± 0.048 | 0.240<br>± 0.060 | 0.131<br>± 0.015  | 0.136<br>± 0.014  | 0.186<br>± 0.062 | 0.169<br>± 0.051  | 0.121<br>± 0.020  | 0.107<br>± 0.019  | 0.162<br>± 0.046 | 0.136<br>± 0.035  | 0.143<br>± 0.000 | 0.102<br>± 0.032  | <b>0.257</b><br>± 0.056 | 0.160<br>± 0.047  | 0.229<br>± 0.045  | 0.160<br>± 0.040  | 0.324<br>± 0.063  | 0.145<br>± 0.016  |
|               | Acc.1    | 0.252<br>± 0.062        | 0.198<br>± 0.067 | 0.221<br>± 0.048 | 0.240<br>± 0.060 | 0.131<br>± 0.015  | 0.136<br>± 0.014  | 0.186<br>± 0.062 | 0.169<br>± 0.051  | 0.121<br>± 0.020  | 0.112<br>± 0.022  | 0.162<br>± 0.046 | 0.136<br>± 0.035  | 0.140<br>± 0.005 | 0.105<br>± 0.035  | <b>0.257</b><br>± 0.056 | 0.157<br>± 0.046  | 0.240<br>± 0.045  | 0.157<br>± 0.042  | 0.328<br>± 0.066  | 0.143<br>± 0.026  |
|               | Acc.2    | 0.252<br>± 0.062        | 0.198<br>± 0.067 | 0.221<br>± 0.048 | 0.240<br>± 0.060 | 0.131<br>± 0.015  | 0.136<br>± 0.014  | 0.186<br>± 0.062 | 0.169<br>± 0.051  | 0.121<br>± 0.020  | 0.112<br>± 0.022  | 0.162<br>± 0.046 | 0.136<br>± 0.035  | 0.140<br>± 0.005 | 0.105<br>± 0.035  | <b>0.257</b><br>± 0.056 | 0.157<br>± 0.046  | 0.240<br>± 0.045  | 0.157<br>± 0.042  | 0.328<br>± 0.066  | 0.143<br>± 0.026  |

Continued on next page

| SubjectMetric |          | DeepConvnet                    | EEGNet          | Conformer       | CTNet                          | BIOT (f)         | BIOT (l)         | BENDR (f)       | BENDR (l)        | CBraMod (f)      | CBraMod (l)      | EEGPT (f)       | EEGPT (l)       | LaBraM (f)       | LaBraM (l)       | STEEGformer-s (f)              | STEEGformer-s (l) | STEEGformer-b (f) | STEEGformer-b (l) | STEEGformer-l (f)              | STEEGformer-l (l) |
|---------------|----------|--------------------------------|-----------------|-----------------|--------------------------------|------------------|------------------|-----------------|------------------|------------------|------------------|-----------------|-----------------|------------------|------------------|--------------------------------|-------------------|-------------------|-------------------|--------------------------------|-------------------|
| sub15         | Acc.2    | <b>0.448</b><br>± <b>0.063</b> | 0.379<br>±0.046 | 0.388<br>±0.048 | 0.405<br>±0.056                | 0.290<br>±0.020  | 0.276<br>±0.016  | 0.360<br>±0.049 | 0.286<br>±0.051  | 0.262<br>±0.044  | 0.212<br>±0.036  | 0.279<br>±0.039 | 0.279<br>±0.032 | 0.286<br>±0.000  | 0.207<br>±0.032  | <b>0.448</b><br>± <b>0.078</b> | 0.293<br>±0.033   | 0.435<br>±0.030   | 0.294<br>±0.043   | 0.502<br>± 0.084               | 0.295<br>±0.065   |
|               | $\kappa$ | 0.153<br>±0.026                | 0.128<br>±0.060 | 0.128<br>±0.032 | 0.172<br>±0.064                | -0.014<br>±0.028 | -0.033<br>±0.027 | 0.025<br>±0.027 | 0.036<br>±0.056  | -0.033<br>±0.029 | -0.003<br>±0.006 | 0.036<br>±0.066 | 0.064<br>±0.058 | -0.006<br>±0.012 | 0.031<br>±0.019  | <b>0.200</b><br>± <b>0.025</b> | 0.039<br>±0.055   | 0.178<br>±0.040   | 0.047<br>±0.042   | 0.236<br>± 0.043               | 0.050<br>±0.059   |
|               | AUC      | <b>0.670</b><br>± <b>0.041</b> | 0.637<br>±0.029 | 0.626<br>±0.037 | 0.662<br>±0.042                | 0.493<br>±0.023  | 0.475<br>±0.048  | 0.563<br>±0.023 | 0.539<br>±0.047  | 0.474<br>±0.060  | 0.507<br>±0.043  | 0.556<br>±0.051 | 0.567<br>±0.036 | 0.489<br>±0.015  | 0.516<br>±0.016  | 0.667<br>±0.027                | 0.549<br>±0.045   | 0.655<br>±0.025   | 0.537<br>±0.054   | 0.692<br>± 0.043               | 0.560<br>±0.048   |
|               | BAcc     | 0.274<br>±0.022                | 0.252<br>±0.051 | 0.252<br>±0.027 | 0.290<br>±0.055                | 0.131<br>±0.024  | 0.114<br>±0.023  | 0.164<br>±0.023 | 0.174<br>±0.048  | 0.114<br>±0.025  | 0.140<br>±0.005  | 0.174<br>±0.057 | 0.198<br>±0.050 | 0.138<br>±0.010  | 0.169<br>±0.017  | <b>0.314</b><br>± <b>0.022</b> | 0.176<br>±0.047   | 0.295<br>±0.034   | 0.183<br>±0.036   | 0.345<br>± 0.037               | 0.186<br>±0.051   |
|               | Acc.1    | 0.274<br>±0.022                | 0.252<br>±0.051 | 0.252<br>±0.027 | 0.290<br>±0.055                | 0.131<br>±0.024  | 0.114<br>±0.023  | 0.164<br>±0.023 | 0.174<br>±0.048  | 0.117<br>±0.023  | 0.140<br>±0.005  | 0.174<br>±0.057 | 0.198<br>±0.050 | 0.143<br>±0.000  | 0.167<br>±0.016  | <b>0.314</b><br>± <b>0.022</b> | 0.176<br>±0.047   | 0.298<br>±0.043   | 0.182<br>±0.030   | 0.353<br>± 0.042               | 0.182<br>±0.053   |
|               | Acc.2    | 0.469<br>±0.052                | 0.421<br>±0.062 | 0.426<br>±0.042 | 0.445<br>±0.069                | 0.269<br>±0.026  | 0.250<br>±0.030  | 0.348<br>±0.054 | 0.331<br>±0.077  | 0.264<br>±0.064  | 0.290<br>±0.018  | 0.348<br>±0.059 | 0.348<br>±0.020 | 0.276<br>±0.015  | 0.305<br>±0.019  | <b>0.507</b><br>± <b>0.056</b> | 0.338<br>±0.057   | 0.470<br>±0.063   | 0.322<br>±0.034   | 0.559<br>± 0.045               | 0.325<br>±0.069   |
|               | $\kappa$ | <b>0.217</b><br>± <b>0.045</b> | 0.161<br>±0.047 | 0.122<br>±0.049 | 0.200<br>±0.033                | 0.072<br>±0.054  | 0.003<br>±0.023  | 0.089<br>±0.075 | -0.014<br>±0.047 | 0.017<br>±0.043  | 0.000<br>±0.000  | 0.047<br>±0.029 | 0.042<br>±0.048 | 0.000<br>±0.000  | 0.011<br>±0.031  | 0.186<br>±0.036                | 0.003<br>±0.057   | 0.194<br>±0.044   | 0.033<br>±0.058   | 0.253<br>± 0.027               | 0.025<br>±0.021   |
| sub2          | AUC      | 0.676<br>±0.040                | 0.663<br>±0.034 | 0.645<br>±0.046 | 0.688<br>± 0.034               | 0.549<br>±0.045  | 0.517<br>±0.037  | 0.554<br>±0.032 | 0.506<br>±0.041  | 0.513<br>±0.067  | 0.500<br>±0.011  | 0.529<br>±0.032 | 0.537<br>±0.037 | 0.500<br>±0.000  | 0.479<br>±0.025  | 0.665<br>±0.032                | 0.525<br>±0.030   | 0.655<br>±0.045   | 0.523<br>±0.021   | <b>0.686</b><br>± <b>0.019</b> | 0.552<br>±0.032   |
|               | BAcc     | <b>0.329</b><br>± <b>0.038</b> | 0.281<br>±0.040 | 0.248<br>±0.042 | 0.314<br>±0.029                | 0.205<br>±0.046  | 0.145<br>±0.020  | 0.219<br>±0.064 | 0.131<br>±0.040  | 0.157<br>±0.037  | 0.143<br>±0.000  | 0.183<br>±0.025 | 0.179<br>±0.041 | 0.143<br>±0.000  | 0.152<br>±0.027  | 0.302<br>±0.031                | 0.145<br>±0.049   | 0.310<br>±0.038   | 0.171<br>±0.050   | 0.360<br>± 0.023               | 0.164<br>±0.018   |
|               | Acc.1    | <b>0.329</b><br>± <b>0.038</b> | 0.281<br>±0.040 | 0.248<br>±0.042 | 0.314<br>±0.029                | 0.205<br>±0.046  | 0.145<br>±0.020  | 0.219<br>±0.064 | 0.131<br>±0.040  | 0.157<br>±0.037  | 0.143<br>±0.000  | 0.183<br>±0.025 | 0.179<br>±0.041 | 0.143<br>±0.000  | 0.157<br>±0.031  | 0.302<br>±0.031                | 0.148<br>±0.050   | 0.318<br>±0.040   | 0.173<br>±0.053   | 0.355<br>± 0.025               | 0.163<br>±0.013   |
|               | Acc.2    | 0.476<br>±0.059                | 0.476<br>±0.060 | 0.445<br>±0.052 | <b>0.514</b><br>± <b>0.037</b> | 0.329<br>±0.018  | 0.279<br>±0.007  | 0.376<br>±0.030 | 0.319<br>±0.050  | 0.314<br>±0.040  | 0.286<br>±0.000  | 0.321<br>±0.066 | 0.319<br>±0.053 | 0.283<br>±0.005  | 0.271<br>±0.024  | 0.502<br>±0.054                | 0.298<br>±0.034   | 0.495<br>±0.044   | 0.312<br>±0.053   | 0.538<br>± 0.026               | 0.307<br>±0.032   |
|               | $\kappa$ | 0.119<br>±0.035                | 0.103<br>±0.042 | 0.100<br>±0.030 | <b>0.161</b><br>± <b>0.041</b> | -0.006<br>±0.063 | -0.011<br>±0.050 | 0.042<br>±0.020 | -0.000<br>±0.033 | -0.028<br>±0.017 | 0.008<br>±0.012  | 0.061<br>±0.054 | 0.064<br>±0.051 | 0.000<br>±0.000  | -0.003<br>±0.039 | 0.153<br>±0.055                | 0.019<br>±0.050   | 0.150<br>±0.040   | 0.042<br>±0.073   | 0.261<br>± 0.065               | -0.003<br>±0.043  |
| sub3          | AUC      | 0.643<br>±0.019                | 0.635<br>±0.023 | 0.613<br>±0.036 | 0.646<br>±0.029                | 0.495<br>±0.029  | 0.462<br>±0.020  | 0.525<br>±0.021 | 0.499<br>±0.030  | 0.441<br>±0.048  | 0.448<br>±0.040  | 0.548<br>±0.016 | 0.556<br>±0.044 | 0.500<br>±0.000  | 0.461<br>±0.034  | <b>0.657</b><br>± <b>0.045</b> | 0.533<br>±0.059   | 0.643<br>±0.023   | 0.530<br>±0.052   | 0.706<br>± 0.030               | 0.531<br>±0.020   |
|               | BAcc     | 0.245<br>±0.030                | 0.231<br>±0.036 | 0.229<br>±0.026 | <b>0.281</b><br>± <b>0.035</b> | 0.138<br>±0.054  | 0.133<br>±0.043  | 0.179<br>±0.017 | 0.143<br>±0.028  | 0.119<br>±0.015  | 0.150<br>±0.011  | 0.195<br>±0.047 | 0.198<br>±0.043 | 0.143<br>±0.000  | 0.140<br>±0.033  | 0.274<br>±0.047                | 0.160<br>±0.043   | 0.271<br>±0.034   | 0.179<br>±0.062   | 0.367<br>± 0.055               | 0.140<br>±0.037   |
|               | Acc.1    | 0.245<br>±0.030                | 0.233<br>±0.040 | 0.229<br>±0.026 | <b>0.281</b><br>± <b>0.035</b> | 0.138<br>±0.054  | 0.133<br>±0.043  | 0.179<br>±0.017 | 0.143<br>±0.028  | 0.119<br>±0.015  | 0.155<br>±0.017  | 0.195<br>±0.047 | 0.198<br>±0.043 | 0.143<br>±0.000  | 0.140<br>±0.033  | 0.274<br>±0.047                | 0.162<br>±0.042   | 0.264<br>±0.032   | 0.184<br>±0.057   | 0.367<br>± 0.061               | 0.142<br>±0.039   |
|               | Acc.2    | 0.476<br>±0.059                | 0.476<br>±0.060 | 0.445<br>±0.052 | <b>0.514</b><br>± <b>0.037</b> | 0.329<br>±0.018  | 0.279<br>±0.007  | 0.376<br>±0.030 | 0.319<br>±0.050  | 0.314<br>±0.040  | 0.286<br>±0.000  | 0.321<br>±0.066 | 0.319<br>±0.053 | 0.283<br>±0.005  | 0.271<br>±0.024  | 0.502<br>±0.054                | 0.298<br>±0.034   | 0.495<br>±0.044   | 0.312<br>±0.053   | 0.538<br>± 0.026               | 0.307<br>±0.032   |

Continued on next page

| SubjectMetric |          | DeepConvnet            | EEGNet          | Conformer       | CTNet                  | BIOT (f)        | BIOT (l)         | BENDR (f)       | BENDR (l)       | CBraMod (f)      | CBraMod (l)     | EEGPT (f)        | EEGPT (l)       | LaBraM (f)      | LaBraM (l)       | STEEGformer-s (f)      | STEEGformer-s (l) | STEEGformer-b (f)      | STEEGformer-b (l) | STEEGformer-l (f)      | STEEGformer-l (l) |
|---------------|----------|------------------------|-----------------|-----------------|------------------------|-----------------|------------------|-----------------|-----------------|------------------|-----------------|------------------|-----------------|-----------------|------------------|------------------------|-------------------|------------------------|-------------------|------------------------|-------------------|
| sub4          | Acc.2    | 0.407<br>±0.049        | 0.421<br>±0.063 | 0.417<br>±0.070 | 0.460<br>±0.060        | 0.295<br>±0.020 | 0.267<br>±0.037  | 0.317<br>±0.025 | 0.300<br>±0.031 | 0.221<br>±0.032  | 0.286<br>±0.008 | 0.345<br>±0.037  | 0.343<br>±0.058 | 0.286<br>±0.000 | 0.245<br>±0.042  | 0.486<br>±0.064        | 0.293<br>±0.023   | <b>0.494</b><br>±0.029 | 0.320<br>±0.049   | 0.588<br>±0.066        | 0.324<br>±0.027   |
|               | $\kappa$ | <b>0.222</b><br>±0.068 | 0.142<br>±0.075 | 0.136<br>±0.036 | 0.164<br>±0.053        | 0.014<br>±0.028 | -0.028<br>±0.035 | 0.111<br>±0.065 | 0.028<br>±0.044 | 0.025<br>±0.077  | 0.006<br>±0.012 | 0.006<br>±0.066  | 0.061<br>±0.012 | 0.003<br>±0.006 | -0.017<br>±0.039 | 0.203<br>±0.048        | 0.053<br>±0.045   | 0.186<br>±0.032        | 0.053<br>±0.048   | 0.236<br>±0.071        | 0.064<br>±0.027   |
|               | AUC      | 0.687<br>±0.037        | 0.661<br>±0.056 | 0.641<br>±0.040 | <b>0.682</b><br>±0.041 | 0.514<br>±0.017 | 0.475<br>±0.043  | 0.587<br>±0.051 | 0.529<br>±0.030 | 0.514<br>±0.066  | 0.526<br>±0.045 | 0.540<br>±0.038  | 0.561<br>±0.027 | 0.499<br>±0.002 | 0.508<br>±0.026  | 0.626<br>±0.035        | 0.544<br>±0.049   | 0.661<br>±0.036        | 0.567<br>±0.025   | 0.679<br>±0.025        | 0.561<br>±0.035   |
|               | BAcc     | <b>0.333</b><br>±0.058 | 0.264<br>±0.064 | 0.260<br>±0.031 | 0.283<br>±0.046        | 0.155<br>±0.024 | 0.119<br>±0.030  | 0.238<br>±0.056 | 0.167<br>±0.038 | 0.164<br>±0.066  | 0.148<br>±0.011 | 0.148<br>±0.057  | 0.195<br>±0.011 | 0.145<br>±0.005 | 0.129<br>±0.033  | 0.317<br>±0.041        | 0.188<br>±0.039   | 0.302<br>±0.027        | 0.188<br>±0.041   | 0.345<br>±0.061        | 0.198<br>±0.023   |
|               | Acc.1    | <b>0.333</b><br>±0.058 | 0.264<br>±0.064 | 0.260<br>±0.031 | 0.286<br>±0.042        | 0.155<br>±0.024 | 0.119<br>±0.030  | 0.238<br>±0.056 | 0.167<br>±0.038 | 0.164<br>±0.066  | 0.138<br>±0.011 | 0.148<br>±0.057  | 0.195<br>±0.011 | 0.129<br>±0.037 | 0.133<br>±0.032  | 0.317<br>±0.041        | 0.190<br>±0.041   | 0.308<br>±0.033        | 0.185<br>±0.042   | 0.347<br>±0.063        | 0.192<br>±0.019   |
|               | Acc.2    | 0.493<br>±0.081        | 0.438<br>±0.063 | 0.417<br>±0.035 | 0.488<br>±0.086        | 0.295<br>±0.027 | 0.240<br>±0.056  | 0.398<br>±0.055 | 0.305<br>±0.050 | 0.312<br>±0.088  | 0.290<br>±0.014 | 0.317<br>±0.060  | 0.360<br>±0.046 | 0.286<br>±0.000 | 0.281<br>±0.035  | 0.474<br>±0.052        | 0.317<br>±0.060   | <b>0.501</b><br>±0.056 | 0.366<br>±0.040   | 0.520<br>±0.044        | 0.347<br>±0.039   |
| sub5          | $\kappa$ | 0.186<br>±0.085        | 0.139<br>±0.067 | 0.100<br>±0.037 | 0.125<br>±0.074        | 0.003<br>±0.082 | -0.017<br>±0.039 | 0.050<br>±0.050 | 0.022<br>±0.019 | -0.039<br>±0.048 | 0.003<br>±0.006 | 0.028<br>±0.033  | 0.042<br>±0.055 | 0.000<br>±0.000 | 0.006<br>±0.056  | 0.253<br>±0.043        | 0.044<br>±0.074   | 0.153<br>±0.081        | 0.056<br>±0.062   | <b>0.242</b><br>±0.085 | 0.022<br>±0.054   |
|               | AUC      | 0.701<br>±0.034        | 0.658<br>±0.031 | 0.622<br>±0.034 | 0.679<br>±0.032        | 0.503<br>±0.056 | 0.498<br>±0.032  | 0.566<br>±0.021 | 0.538<br>±0.025 | 0.478<br>±0.051  | 0.487<br>±0.041 | 0.515<br>±0.064  | 0.538<br>±0.042 | 0.500<br>±0.000 | 0.513<br>±0.019  | <b>0.702</b><br>±0.027 | 0.539<br>±0.043   | 0.638<br>±0.037        | 0.566<br>±0.028   | 0.703<br>±0.030        | 0.567<br>±0.033   |
|               | BAcc     | 0.302<br>±0.073        | 0.262<br>±0.058 | 0.229<br>±0.032 | 0.250<br>±0.064        | 0.145<br>±0.071 | 0.129<br>±0.033  | 0.186<br>±0.043 | 0.162<br>±0.016 | 0.110<br>±0.041  | 0.145<br>±0.005 | 0.167<br>±0.028  | 0.179<br>±0.047 | 0.143<br>±0.000 | 0.148<br>±0.048  | 0.360<br>±0.037        | 0.181<br>±0.063   | 0.274<br>±0.069        | 0.190<br>±0.053   | <b>0.350</b><br>±0.073 | 0.162<br>±0.047   |
|               | Acc.1    | 0.302<br>±0.073        | 0.262<br>±0.058 | 0.229<br>±0.032 | 0.250<br>±0.064        | 0.145<br>±0.071 | 0.129<br>±0.033  | 0.186<br>±0.043 | 0.162<br>±0.016 | 0.110<br>±0.041  | 0.140<br>±0.005 | 0.167<br>±0.028  | 0.179<br>±0.047 | 0.143<br>±0.008 | 0.148<br>±0.048  | 0.360<br>±0.037        | 0.183<br>±0.060   | 0.273<br>±0.071        | 0.192<br>±0.056   | <b>0.356</b><br>±0.079 | 0.155<br>±0.044   |
|               | Acc.2    | 0.514<br>±0.081        | 0.436<br>±0.018 | 0.445<br>±0.057 | 0.479<br>±0.049        | 0.293<br>±0.097 | 0.281<br>±0.042  | 0.336<br>±0.036 | 0.345<br>±0.065 | 0.257<br>±0.062  | 0.283<br>±0.005 | 0.324<br>±0.087  | 0.329<br>±0.074 | 0.286<br>±0.000 | 0.305<br>±0.020  | <b>0.538</b><br>±0.044 | 0.357<br>±0.089   | 0.460<br>±0.053        | 0.381<br>±0.025   | 0.561<br>±0.030        | 0.327<br>±0.047   |
|               | $\kappa$ | 0.181<br>±0.060        | 0.153<br>±0.052 | 0.153<br>±0.064 | 0.178<br>±0.025        | 0.058<br>±0.054 | 0.008<br>±0.025  | 0.069<br>±0.056 | 0.031<br>±0.060 | 0.003<br>±0.049  | 0.000<br>±0.000 | -0.006<br>±0.036 | 0.058<br>±0.048 | 0.000<br>±0.000 | -0.008<br>±0.007 | 0.186<br>±0.038        | 0.042<br>±0.035   | 0.250<br>±0.059        | 0.042<br>±0.056   | <b>0.239</b><br>±0.065 | 0.019<br>±0.027   |
| sub6          | AUC      | 0.687<br>±0.027        | 0.668<br>±0.038 | 0.656<br>±0.055 | 0.696<br>±0.018        | 0.547<br>±0.052 | 0.495<br>±0.038  | 0.565<br>±0.026 | 0.543<br>±0.060 | 0.491<br>±0.032  | 0.489<br>±0.034 | 0.521<br>±0.034  | 0.575<br>±0.033 | 0.500<br>±0.000 | 0.509<br>±0.023  | 0.651<br>±0.048        | 0.542<br>±0.046   | 0.689<br>±0.033        | 0.539<br>±0.025   | <b>0.691</b><br>±0.030 | 0.522<br>±0.012   |
|               | BAcc     | 0.298<br>±0.051        | 0.274<br>±0.045 | 0.274<br>±0.055 | 0.295<br>±0.021        | 0.193<br>±0.046 | 0.150<br>±0.022  | 0.202<br>±0.048 | 0.169<br>±0.051 | 0.145<br>±0.042  | 0.143<br>±0.000 | 0.138<br>±0.031  | 0.193<br>±0.041 | 0.143<br>±0.000 | 0.136<br>±0.006  | 0.302<br>±0.032        | 0.179<br>±0.030   | 0.357<br>±0.051        | 0.179<br>±0.048   | <b>0.348</b><br>±0.055 | 0.160<br>±0.023   |
|               | Acc.1    | 0.298<br>±0.051        | 0.274<br>±0.045 | 0.274<br>±0.055 | 0.295<br>±0.021        | 0.193<br>±0.046 | 0.150<br>±0.022  | 0.202<br>±0.048 | 0.169<br>±0.051 | 0.145<br>±0.042  | 0.143<br>±0.000 | 0.138<br>±0.031  | 0.193<br>±0.041 | 0.143<br>±0.000 | 0.136<br>±0.006  | 0.302<br>±0.032        | 0.179<br>±0.030   | 0.356<br>±0.050        | 0.182<br>±0.048   | <b>0.344</b><br>±0.054 | 0.165<br>±0.025   |
|               | Acc.2    | 0.298<br>±0.051        | 0.274<br>±0.045 | 0.274<br>±0.055 | 0.295<br>±0.021        | 0.193<br>±0.046 | 0.150<br>±0.022  | 0.202<br>±0.048 | 0.169<br>±0.051 | 0.145<br>±0.042  | 0.143<br>±0.000 | 0.138<br>±0.031  | 0.193<br>±0.041 | 0.143<br>±0.000 | 0.136<br>±0.006  | 0.302<br>±0.032        | 0.179<br>±0.030   | 0.356<br>±0.050        | 0.182<br>±0.048   | <b>0.344</b><br>±0.054 | 0.165<br>±0.025   |

Continued on next page

| SubjectMetric |          | DeepConvnet     | EEGNet          | Conformer       | CTNet                          | BIOT (f)         | BIOT (l)         | BENDR (f)       | BENDR (l)       | CBraMod (f)      | CBraMod (l)      | EEGPT (f)       | EEGPT (l)       | LaBraM (f)      | LaBraM (l)       | STEEGformer-s (f)              | STEEGformer-s (l) | STEEGformer-b (f)              | STEEGformer-b (l) | STEEGformer-l (f) | STEEGformer-l (l) |
|---------------|----------|-----------------|-----------------|-----------------|--------------------------------|------------------|------------------|-----------------|-----------------|------------------|------------------|-----------------|-----------------|-----------------|------------------|--------------------------------|-------------------|--------------------------------|-------------------|-------------------|-------------------|
| sub7          | Acc.2    | 0.483<br>±0.022 | 0.471<br>±0.068 | 0.455<br>±0.043 | 0.483<br>±0.027                | 0.350<br>±0.050  | 0.279<br>±0.011  | 0.350<br>±0.026 | 0.324<br>±0.080 | 0.295<br>±0.055  | 0.286<br>±0.000  | 0.305<br>±0.046 | 0.338<br>±0.057 | 0.286<br>±0.000 | 0.286<br>±0.021  | 0.512<br>±0.044                | 0.302<br>±0.016   | <b>0.521</b><br>± <b>0.049</b> | 0.330<br>±0.014   | 0.549<br>± 0.056  | 0.303<br>±0.007   |
|               | $\kappa$ | 0.064<br>±0.039 | 0.103<br>±0.056 | 0.072<br>±0.043 | 0.111<br>±0.050                | -0.022<br>±0.029 | 0.003<br>±0.035  | 0.061<br>±0.036 | 0.003<br>±0.072 | -0.000<br>±0.059 | -0.019<br>±0.030 | 0.017<br>±0.041 | 0.042<br>±0.083 | 0.000<br>±0.000 | -0.003<br>±0.019 | 0.103<br>±0.086                | 0.033<br>±0.023   | <b>0.156</b><br>± <b>0.076</b> | 0.047<br>±0.052   | 0.197<br>± 0.062  | 0.008<br>±0.038   |
|               | AUC      | 0.605<br>±0.026 | 0.604<br>±0.044 | 0.584<br>±0.011 | <b>0.629</b><br>± <b>0.018</b> | 0.487<br>±0.018  | 0.501<br>±0.009  | 0.555<br>±0.016 | 0.526<br>±0.036 | 0.454<br>±0.046  | 0.441<br>±0.031  | 0.528<br>±0.029 | 0.512<br>±0.055 | 0.500<br>±0.000 | 0.479<br>±0.009  | 0.601<br>±0.054                | 0.535<br>±0.045   | 0.617<br>±0.029                | 0.548<br>±0.055   | 0.661<br>± 0.019  | 0.540<br>±0.052   |
|               | BACc     | 0.198<br>±0.033 | 0.231<br>±0.048 | 0.205<br>±0.037 | 0.238<br>±0.043                | 0.124<br>±0.025  | 0.145<br>±0.030  | 0.195<br>±0.031 | 0.145<br>±0.062 | 0.143<br>±0.051  | 0.126<br>±0.026  | 0.157<br>±0.035 | 0.179<br>±0.071 | 0.143<br>±0.000 | 0.140<br>±0.017  | 0.231<br>±0.074                | 0.171<br>±0.020   | <b>0.276</b><br>± <b>0.065</b> | 0.183<br>±0.044   | 0.312<br>± 0.053  | 0.150<br>±0.032   |
|               | Acc.1    | 0.198<br>±0.033 | 0.231<br>±0.048 | 0.205<br>±0.037 | 0.238<br>±0.043                | 0.124<br>±0.025  | 0.145<br>±0.030  | 0.195<br>±0.031 | 0.145<br>±0.062 | 0.143<br>±0.051  | 0.129<br>±0.020  | 0.157<br>±0.035 | 0.179<br>±0.071 | 0.143<br>±0.000 | 0.140<br>±0.015  | 0.231<br>±0.074                | 0.171<br>±0.020   | <b>0.274</b><br>± <b>0.061</b> | 0.179<br>±0.038   | 0.312<br>± 0.058  | 0.146<br>±0.028   |
|               | Acc.2    | 0.386<br>±0.029 | 0.390<br>±0.077 | 0.376<br>±0.032 | 0.429<br>±0.019                | 0.252<br>±0.021  | 0.250<br>±0.022  | 0.360<br>±0.047 | 0.305<br>±0.045 | 0.260<br>±0.041  | 0.274<br>±0.017  | 0.286<br>±0.050 | 0.310<br>±0.085 | 0.286<br>±0.000 | 0.288<br>±0.022  | 0.417<br>±0.062                | 0.312<br>±0.049   | <b>0.437</b><br>± <b>0.049</b> | 0.356<br>±0.069   | 0.477<br>± 0.053  | 0.305<br>±0.055   |
|               | $\kappa$ | 0.139<br>±0.051 | 0.144<br>±0.062 | 0.133<br>±0.021 | <b>0.228</b><br>± <b>0.041</b> | 0.022<br>±0.032  | 0.000<br>±0.010  | 0.086<br>±0.060 | 0.047<br>±0.063 | 0.019<br>±0.050  | -0.003<br>±0.006 | 0.069<br>±0.059 | 0.069<br>±0.029 | 0.000<br>±0.000 | -0.006<br>±0.048 | 0.186<br>±0.025                | -0.031<br>±0.036  | 0.169<br>±0.050                | 0.081<br>±0.054   | 0.281<br>± 0.084  | 0.011<br>±0.050   |
| sub8          | AUC      | 0.664<br>±0.034 | 0.670<br>±0.027 | 0.643<br>±0.023 | <b>0.704</b><br>± <b>0.015</b> | 0.520<br>±0.033  | 0.508<br>±0.033  | 0.589<br>±0.029 | 0.542<br>±0.024 | 0.486<br>±0.044  | 0.547<br>±0.030  | 0.568<br>±0.036 | 0.570<br>±0.012 | 0.498<br>±0.004 | 0.483<br>±0.037  | 0.662<br>±0.048                | 0.524<br>±0.015   | 0.663<br>±0.050                | 0.564<br>±0.031   | 0.729<br>± 0.043  | 0.563<br>±0.015   |
|               | BACc     | 0.262<br>±0.044 | 0.267<br>±0.053 | 0.257<br>±0.018 | <b>0.338</b><br>± <b>0.035</b> | 0.162<br>±0.027  | 0.143<br>±0.008  | 0.217<br>±0.051 | 0.183<br>±0.054 | 0.160<br>±0.043  | 0.140<br>±0.005  | 0.202<br>±0.051 | 0.202<br>±0.025 | 0.143<br>±0.000 | 0.138<br>±0.041  | 0.302<br>±0.022                | 0.117<br>±0.031   | 0.288<br>±0.043                | 0.212<br>±0.046   | 0.383<br>± 0.072  | 0.152<br>±0.043   |
|               | Acc.1    | 0.262<br>±0.044 | 0.267<br>±0.053 | 0.257<br>±0.018 | <b>0.338</b><br>± <b>0.035</b> | 0.162<br>±0.027  | 0.143<br>±0.008  | 0.217<br>±0.051 | 0.183<br>±0.054 | 0.160<br>±0.043  | 0.143<br>±0.008  | 0.202<br>±0.051 | 0.202<br>±0.025 | 0.143<br>±0.000 | 0.136<br>±0.036  | 0.302<br>±0.022                | 0.117<br>±0.031   | 0.297<br>±0.032                | 0.222<br>±0.047   | 0.383<br>± 0.058  | 0.159<br>±0.042   |
|               | Acc.2    | 0.467<br>±0.072 | 0.457<br>±0.078 | 0.455<br>±0.060 | 0.512<br>±0.042                | 0.305<br>±0.066  | 0.281<br>±0.011  | 0.393<br>±0.058 | 0.338<br>±0.046 | 0.279<br>±0.052  | 0.283<br>±0.013  | 0.364<br>±0.047 | 0.379<br>±0.037 | 0.286<br>±0.000 | 0.279<br>±0.017  | <b>0.531</b><br>± <b>0.064</b> | 0.267<br>±0.030   | 0.518<br>±0.060                | 0.360<br>±0.040   | 0.610<br>± 0.043  | 0.313<br>±0.035   |
|               | $\kappa$ | 0.061<br>±0.087 | 0.119<br>±0.066 | 0.081<br>±0.035 | 0.097<br>±0.096                | 0.025<br>±0.033  | -0.031<br>±0.036 | 0.061<br>±0.064 | 0.047<br>±0.091 | -0.033<br>±0.049 | 0.006<br>±0.016  | 0.042<br>±0.060 | 0.044<br>±0.061 | 0.000<br>±0.000 | 0.017<br>±0.022  | 0.108<br>±0.090                | 0.006<br>±0.036   | <b>0.136</b><br>± <b>0.060</b> | -0.011<br>±0.033  | 0.217<br>± 0.070  | 0.011<br>±0.052   |
| sub9          | AUC      | 0.618<br>±0.053 | 0.623<br>±0.053 | 0.593<br>±0.042 | <b>0.652</b><br>± <b>0.035</b> | 0.489<br>±0.034  | 0.462<br>±0.044  | 0.572<br>±0.046 | 0.513<br>±0.034 | 0.478<br>±0.017  | 0.449<br>±0.027  | 0.550<br>±0.033 | 0.536<br>±0.036 | 0.493<br>±0.013 | 0.467<br>±0.034  | 0.603<br>±0.082                | 0.505<br>±0.018   | 0.632<br>±0.034                | 0.483<br>±0.020   | 0.671<br>± 0.029  | 0.511<br>±0.036   |
|               | BACc     | 0.195<br>±0.074 | 0.245<br>±0.056 | 0.212<br>±0.030 | 0.226<br>±0.082                | 0.164<br>±0.028  | 0.117<br>±0.031  | 0.195<br>±0.055 | 0.183<br>±0.078 | 0.114<br>±0.042  | 0.148<br>±0.014  | 0.179<br>±0.051 | 0.181<br>±0.052 | 0.143<br>±0.000 | 0.157<br>±0.018  | 0.236<br>±0.077                | 0.148<br>±0.031   | <b>0.260</b><br>± <b>0.051</b> | 0.133<br>±0.028   | 0.329<br>± 0.060  | 0.152<br>±0.045   |
|               | Acc.1    | 0.195<br>±0.074 | 0.245<br>±0.056 | 0.212<br>±0.030 | 0.226<br>±0.082                | 0.164<br>±0.028  | 0.117<br>±0.031  | 0.195<br>±0.055 | 0.183<br>±0.078 | 0.114<br>±0.042  | 0.152<br>±0.010  | 0.179<br>±0.051 | 0.181<br>±0.052 | 0.136<br>±0.015 | 0.152<br>±0.018  | 0.236<br>±0.077                | 0.150<br>±0.033   | <b>0.252</b><br>± <b>0.052</b> | 0.133<br>±0.028   | 0.343<br>± 0.060  | 0.153<br>±0.048   |
|               | Acc.2    | 0.195<br>±0.074 | 0.245<br>±0.056 | 0.212<br>±0.030 | 0.226<br>±0.082                | 0.164<br>±0.028  | 0.117<br>±0.031  | 0.195<br>±0.055 | 0.183<br>±0.078 | 0.114<br>±0.042  | 0.152<br>±0.010  | 0.179<br>±0.051 | 0.181<br>±0.052 | 0.136<br>±0.015 | 0.152<br>±0.018  | 0.236<br>±0.077                | 0.150<br>±0.033   | <b>0.252</b><br>± <b>0.052</b> | 0.133<br>±0.028   | 0.343<br>± 0.060  | 0.153<br>±0.048   |

Continued on next page

| Subject | Metric | DeepConvNet     | EEGNet          | Conformer       | CTNet           | BIOT (f)        | BIOT (l)        | BENDR (f)       | BENDR (l)       | CBraMod (l)     | CBraMod (l)     | EEGPT (f)       | EEGPT (l)       | LaBraM (f)      | LaBraM (l)      | STEEGformer-s (f) | STEEGformer-s (l) | STEEGformer-b (f) | STEEGformer-b (l) |
|---------|--------|-----------------|-----------------|-----------------|-----------------|-----------------|-----------------|-----------------|-----------------|-----------------|-----------------|-----------------|-----------------|-----------------|-----------------|-------------------|-------------------|-------------------|-------------------|
| Acc.2   |        | 0.386<br>±0.089 | 0.436<br>±0.077 | 0.402<br>±0.056 | 0.419<br>±0.090 | 0.281<br>±0.052 | 0.240<br>±0.063 | 0.379<br>±0.042 | 0.326<br>±0.077 | 0.264<br>±0.036 | 0.281<br>±0.011 | 0.340<br>±0.052 | 0.298<br>±0.060 | 0.286<br>±0.000 | 0.264<br>±0.023 | 0.407<br>±0.106   | 0.321<br>±0.039   | 0.438<br>±0.069   | 0.290<br>±0.033   |
|         |        |                 |                 |                 |                 |                 |                 |                 |                 |                 |                 |                 |                 |                 |                 |                   |                   | 0.541<br>±0.027   | 0.280<br>±0.059   |

## D.2 PER-SUBJECT RESULTS

## D.2.1 WITHIN-SUBJECT EVALUATION

Table 29: Average “Self” Performance Across All Subjects

| Model (Training strategy) | $\kappa$                    | AUC                         | BAcc                        | Acc.1                       | Acc.2                       |
|---------------------------|-----------------------------|-----------------------------|-----------------------------|-----------------------------|-----------------------------|
| <b>DeepConvnet</b>        | <b>0.086</b><br>$\pm 0.027$ | 0.603<br>$\pm 0.025$        | <b>0.217</b><br>$\pm 0.023$ | 0.217<br>$\pm 0.023$        | <b>0.391</b><br>$\pm 0.030$ |
| <b>EEGNet</b>             | 0.085<br>$\pm 0.033$        | <b>0.595</b><br>$\pm 0.034$ | 0.216<br>$\pm 0.028$        | 0.216<br>$\pm 0.028$        | 0.387<br>$\pm 0.042$        |
| <b>Conformer</b>          | 0.102<br>$\pm 0.041$        | 0.594<br>$\pm 0.036$        | 0.230<br>$\pm 0.035$        | 0.230<br>$\pm 0.035$        | 0.396<br>$\pm 0.045$        |
| <b>CTNet</b>              | 0.077<br>$\pm 0.049$        | 0.585<br>$\pm 0.035$        | 0.209<br>$\pm 0.042$        | 0.209<br>$\pm 0.042$        | 0.380<br>$\pm 0.043$        |
| <b>BIOT (f)</b>           | 0.017<br>$\pm 0.030$        | 0.517<br>$\pm 0.025$        | 0.157<br>$\pm 0.026$        | 0.157<br>$\pm 0.026$        | 0.300<br>$\pm 0.039$        |
| <b>BIOT (l)</b>           | -0.012<br>$\pm 0.019$       | 0.487<br>$\pm 0.017$        | 0.133<br>$\pm 0.017$        | 0.133<br>$\pm 0.017$        | 0.268<br>$\pm 0.015$        |
| <b>BENDR (f)</b>          | 0.048<br>$\pm 0.026$        | 0.544<br>$\pm 0.025$        | 0.184<br>$\pm 0.022$        | 0.183<br>$\pm 0.023$        | 0.334<br>$\pm 0.027$        |
| <b>BENDR (l)</b>          | 0.013<br>$\pm 0.022$        | 0.515<br>$\pm 0.018$        | 0.154<br>$\pm 0.019$        | 0.154<br>$\pm 0.019$        | 0.307<br>$\pm 0.025$        |
| <b>CBraMod (f)</b>        | -0.026<br>$\pm 0.034$       | 0.462<br>$\pm 0.036$        | 0.120<br>$\pm 0.029$        | 0.120<br>$\pm 0.029$        | 0.247<br>$\pm 0.039$        |
| <b>CBraMod (l)</b>        | -0.040<br>$\pm 0.029$       | 0.446<br>$\pm 0.019$        | 0.108<br>$\pm 0.025$        | 0.108<br>$\pm 0.025$        | 0.236<br>$\pm 0.036$        |
| <b>EEGPT (f)</b>          | 0.002<br>$\pm 0.027$        | 0.508<br>$\pm 0.021$        | 0.145<br>$\pm 0.023$        | 0.145<br>$\pm 0.023$        | 0.301<br>$\pm 0.022$        |
| <b>EEGPT (l)</b>          | 0.004<br>$\pm 0.028$        | 0.509<br>$\pm 0.022$        | 0.147<br>$\pm 0.024$        | 0.146<br>$\pm 0.026$        | 0.293<br>$\pm 0.030$        |
| <b>LaBraM (f)</b>         | -0.017<br>$\pm 0.018$       | 0.477<br>$\pm 0.024$        | 0.128<br>$\pm 0.015$        | 0.128<br>$\pm 0.015$        | 0.268<br>$\pm 0.024$        |
| <b>LaBraM (l)</b>         | -0.031<br>$\pm 0.022$       | 0.456<br>$\pm 0.019$        | 0.117<br>$\pm 0.019$        | 0.117<br>$\pm 0.019$        | 0.247<br>$\pm 0.026$        |
| <b>STEEGformer-s (f)</b>  | 0.066<br>$\pm 0.046$        | 0.560<br>$\pm 0.037$        | 0.200<br>$\pm 0.039$        | 0.200<br>$\pm 0.039$        | 0.353<br>$\pm 0.047$        |
| <b>STEEGformer-s (l)</b>  | 0.006<br>$\pm 0.020$        | 0.508<br>$\pm 0.021$        | 0.148<br>$\pm 0.017$        | 0.148<br>$\pm 0.018$        | 0.295<br>$\pm 0.021$        |
| <b>STEEGformer-b (f)</b>  | 0.068<br>$\pm 0.042$        | 0.559<br>$\pm 0.032$        | 0.201<br>$\pm 0.036$        | 0.202<br>$\pm 0.037$        | 0.350<br>$\pm 0.038$        |
| <b>STEEGformer-b (l)</b>  | 0.020<br>$\pm 0.028$        | 0.513<br>$\pm 0.023$        | 0.160<br>$\pm 0.024$        | 0.161<br>$\pm 0.024$        | 0.308<br>$\pm 0.027$        |
| <b>STEEGformer-l (f)</b>  | 0.085<br>$\pm 0.044$        | 0.573<br>$\pm 0.036$        | 0.215<br>$\pm 0.038$        | <b>0.218</b><br>$\pm 0.039$ | 0.373<br>$\pm 0.047$        |
| <b>STEEGformer-l (l)</b>  | 0.022<br>$\pm 0.030$        | 0.521<br>$\pm 0.026$        | 0.162<br>$\pm 0.025$        | 0.164<br>$\pm 0.025$        | 0.312<br>$\pm 0.033$        |



Table 30: Per-Subject ‘‘Self’’ Performance (trained+tested on same subject)

| Subject | Metric           | DeepConvnet                 | EEGNet                      | Conformer                   | CTNet                       | BIOT (f)             | BIOT (l)              | BENDR (f)            | BENDR (l)             | CBraMod (f)           | CBraMod (l)           | EEGPT (f)             | EEGPT (l)             | LaBraM (f)            | LaBraM (l)            | STEEGformer-s (f)           | STEEGformer-s (l)     | STEEGformer-b (f)           | STEEGformer-b (l)    | STEEGformer-l (f)           | STEEGformer-l (l)    |
|---------|------------------|-----------------------------|-----------------------------|-----------------------------|-----------------------------|----------------------|-----------------------|----------------------|-----------------------|-----------------------|-----------------------|-----------------------|-----------------------|-----------------------|-----------------------|-----------------------------|-----------------------|-----------------------------|----------------------|-----------------------------|----------------------|
| sub1    | $\kappa$         | <b>0.108</b><br>$\pm 0.049$ | 0.114<br>$\pm 0.041$        | 0.072<br>$\pm 0.080$        | 0.064<br>$\pm 0.038$        | 0.039<br>$\pm 0.058$ | -0.003<br>$\pm 0.021$ | 0.028<br>$\pm 0.022$ | 0.003<br>$\pm 0.044$  | 0.028<br>$\pm 0.056$  | -0.056<br>$\pm 0.047$ | -0.022<br>$\pm 0.029$ | -0.006<br>$\pm 0.038$ | -0.000<br>$\pm 0.047$ | -0.017<br>$\pm 0.027$ | 0.106<br>$\pm 0.032$        | 0.019<br>$\pm 0.054$  | <b>0.108</b><br>$\pm 0.032$ | 0.033<br>$\pm 0.036$ | 0.089<br>$\pm 0.049$        | 0.042<br>$\pm 0.047$ |
|         | AUC              | <b>0.620</b><br>$\pm 0.034$ | 0.629<br>$\pm 0.016$        | 0.580<br>$\pm 0.055$        | 0.590<br>$\pm 0.015$        | 0.533<br>$\pm 0.032$ | 0.503<br>$\pm 0.025$  | 0.535<br>$\pm 0.038$ | 0.513<br>$\pm 0.069$  | 0.508<br>$\pm 0.029$  | 0.465<br>$\pm 0.041$  | 0.503<br>$\pm 0.016$  | 0.499<br>$\pm 0.034$  | 0.494<br>$\pm 0.030$  | 0.460<br>$\pm 0.017$  | 0.571<br>$\pm 0.039$        | 0.502<br>$\pm 0.047$  | 0.591<br>$\pm 0.034$        | 0.508<br>$\pm 0.051$ | 0.601<br>$\pm 0.047$        | 0.529<br>$\pm 0.045$ |
|         | BAcc             | 0.236<br>$\pm 0.042$        | 0.240<br>$\pm 0.035$        | 0.205<br>$\pm 0.069$        | 0.198<br>$\pm 0.032$        | 0.176<br>$\pm 0.049$ | 0.140<br>$\pm 0.018$  | 0.167<br>$\pm 0.019$ | 0.145<br>$\pm 0.038$  | 0.167<br>$\pm 0.048$  | 0.095<br>$\pm 0.040$  | 0.124<br>$\pm 0.025$  | 0.138<br>$\pm 0.032$  | 0.143<br>$\pm 0.040$  | 0.129<br>$\pm 0.023$  | 0.233<br>$\pm 0.027$        | 0.160<br>$\pm 0.047$  | <b>0.236</b><br>$\pm 0.027$ | 0.171<br>$\pm 0.031$ | 0.219<br>$\pm 0.042$        | 0.179<br>$\pm 0.040$ |
|         | Acc <sub>1</sub> | 0.236<br>$\pm 0.042$        | <b>0.240</b><br>$\pm 0.035$ | 0.205<br>$\pm 0.069$        | 0.198<br>$\pm 0.032$        | 0.176<br>$\pm 0.049$ | 0.140<br>$\pm 0.018$  | 0.164<br>$\pm 0.023$ | 0.145<br>$\pm 0.038$  | 0.167<br>$\pm 0.048$  | 0.098<br>$\pm 0.037$  | 0.128<br>$\pm 0.028$  | 0.141<br>$\pm 0.031$  | 0.143<br>$\pm 0.040$  | 0.126<br>$\pm 0.023$  | 0.233<br>$\pm 0.027$        | 0.160<br>$\pm 0.047$  | 0.241<br>$\pm 0.029$        | 0.174<br>$\pm 0.035$ | 0.224<br>$\pm 0.047$        | 0.177<br>$\pm 0.044$ |
|         | Acc <sub>2</sub> | 0.400<br>$\pm 0.054$        | 0.433<br>$\pm 0.049$        | 0.383<br>$\pm 0.068$        | 0.371<br>$\pm 0.061$        | 0.343<br>$\pm 0.027$ | 0.293<br>$\pm 0.023$  | 0.314<br>$\pm 0.018$ | 0.305<br>$\pm 0.070$  | 0.300<br>$\pm 0.026$  | 0.224<br>$\pm 0.023$  | 0.297<br>$\pm 0.060$  | 0.264<br>$\pm 0.035$  | 0.281<br>$\pm 0.064$  | 0.257<br>$\pm 0.037$  | 0.379<br>$\pm 0.040$        | 0.293<br>$\pm 0.072$  | 0.380<br>$\pm 0.034$        | 0.305<br>$\pm 0.080$ | <b>0.407</b><br>$\pm 0.063$ | 0.319<br>$\pm 0.033$ |
| sub10   | $\kappa$         | 0.047<br>$\pm 0.038$        | 0.075<br>$\pm 0.023$        | <b>0.072</b><br>$\pm 0.042$ | 0.044<br>$\pm 0.030$        | 0.003<br>$\pm 0.042$ | -0.019<br>$\pm 0.055$ | 0.056<br>$\pm 0.067$ | 0.033<br>$\pm 0.027$  | -0.058<br>$\pm 0.027$ | -0.042<br>$\pm 0.017$ | -0.022<br>$\pm 0.047$ | 0.000<br>$\pm 0.051$  | -0.025<br>$\pm 0.044$ | -0.022<br>$\pm 0.056$ | 0.008<br>$\pm 0.021$        | -0.011<br>$\pm 0.049$ | 0.033<br>$\pm 0.057$        | 0.033<br>$\pm 0.050$ | 0.028<br>$\pm 0.056$        | 0.047<br>$\pm 0.021$ |
|         | AUC              | 0.577<br>$\pm 0.019$        | 0.568<br>$\pm 0.006$        | <b>0.572</b><br>$\pm 0.011$ | 0.568<br>$\pm 0.024$        | 0.504<br>$\pm 0.061$ | 0.498<br>$\pm 0.042$  | 0.547<br>$\pm 0.053$ | 0.556<br>$\pm 0.032$  | 0.430<br>$\pm 0.025$  | 0.425<br>$\pm 0.016$  | 0.484<br>$\pm 0.037$  | 0.482<br>$\pm 0.031$  | 0.475<br>$\pm 0.032$  | 0.463<br>$\pm 0.031$  | 0.517<br>$\pm 0.027$        | 0.501<br>$\pm 0.053$  | 0.515<br>$\pm 0.043$        | 0.515<br>$\pm 0.054$ | 0.517<br>$\pm 0.028$        | 0.539<br>$\pm 0.026$ |
|         | BAcc             | 0.183<br>$\pm 0.032$        | 0.207<br>$\pm 0.020$        | <b>0.205</b><br>$\pm 0.036$ | 0.181<br>$\pm 0.026$        | 0.145<br>$\pm 0.036$ | 0.126<br>$\pm 0.047$  | 0.190<br>$\pm 0.057$ | 0.171<br>$\pm 0.023$  | 0.093<br>$\pm 0.023$  | 0.107<br>$\pm 0.015$  | 0.124<br>$\pm 0.040$  | 0.143<br>$\pm 0.044$  | 0.121<br>$\pm 0.038$  | 0.124<br>$\pm 0.048$  | 0.150<br>$\pm 0.018$        | 0.133<br>$\pm 0.042$  | 0.171<br>$\pm 0.049$        | 0.171<br>$\pm 0.043$ | 0.167<br>$\pm 0.048$        | 0.183<br>$\pm 0.018$ |
|         | Acc <sub>1</sub> | 0.183<br>$\pm 0.032$        | 0.207<br>$\pm 0.020$        | <b>0.205</b><br>$\pm 0.036$ | 0.181<br>$\pm 0.026$        | 0.145<br>$\pm 0.036$ | 0.126<br>$\pm 0.047$  | 0.190<br>$\pm 0.057$ | 0.171<br>$\pm 0.023$  | 0.093<br>$\pm 0.023$  | 0.107<br>$\pm 0.015$  | 0.123<br>$\pm 0.040$  | 0.142<br>$\pm 0.049$  | 0.121<br>$\pm 0.038$  | 0.124<br>$\pm 0.048$  | 0.150<br>$\pm 0.018$        | 0.133<br>$\pm 0.042$  | 0.163<br>$\pm 0.052$        | 0.168<br>$\pm 0.041$ | 0.172<br>$\pm 0.053$        | 0.186<br>$\pm 0.018$ |
|         | Acc <sub>2</sub> | 0.350<br>$\pm 0.023$        | 0.352<br>$\pm 0.020$        | 0.393<br>$\pm 0.028$        | <b>0.355</b><br>$\pm 0.057$ | 0.310<br>$\pm 0.065$ | 0.281<br>$\pm 0.045$  | 0.331<br>$\pm 0.066$ | 0.352<br>$\pm 0.056$  | 0.195<br>$\pm 0.026$  | 0.231<br>$\pm 0.031$  | 0.286<br>$\pm 0.044$  | 0.265<br>$\pm 0.041$  | 0.271<br>$\pm 0.049$  | 0.262<br>$\pm 0.043$  | 0.286<br>$\pm 0.035$        | 0.276<br>$\pm 0.044$  | 0.287<br>$\pm 0.055$        | 0.294<br>$\pm 0.062$ | 0.317<br>$\pm 0.027$        | 0.345<br>$\pm 0.023$ |
| sub11   | $\kappa$         | 0.081<br>$\pm 0.048$        | 0.064<br>$\pm 0.027$        | 0.108<br>$\pm 0.076$        | 0.036<br>$\pm 0.023$        | 0.025<br>$\pm 0.043$ | -0.044<br>$\pm 0.027$ | 0.006<br>$\pm 0.047$ | -0.011<br>$\pm 0.049$ | -0.025<br>$\pm 0.039$ | -0.031<br>$\pm 0.042$ | 0.014<br>$\pm 0.026$  | -0.008<br>$\pm 0.054$ | -0.000<br>$\pm 0.047$ | -0.067<br>$\pm 0.021$ | <b>0.083</b><br>$\pm 0.026$ | 0.031<br>$\pm 0.043$  | 0.075<br>$\pm 0.029$        | 0.006<br>$\pm 0.038$ | 0.067<br>$\pm 0.032$        | 0.011<br>$\pm 0.035$ |
|         | AUC              | 0.585<br>$\pm 0.026$        | <b>0.578</b><br>$\pm 0.030$ | 0.578<br>$\pm 0.033$        | 0.569<br>$\pm 0.036$        | 0.510<br>$\pm 0.019$ | 0.456<br>$\pm 0.028$  | 0.503<br>$\pm 0.047$ | 0.486<br>$\pm 0.042$  | 0.474<br>$\pm 0.030$  | 0.455<br>$\pm 0.022$  | 0.517<br>$\pm 0.025$  | 0.534<br>$\pm 0.025$  | 0.520<br>$\pm 0.047$  | 0.459<br>$\pm 0.013$  | 0.576<br>$\pm 0.024$        | 0.546<br>$\pm 0.016$  | 0.555<br>$\pm 0.017$        | 0.528<br>$\pm 0.032$ | 0.564<br>$\pm 0.008$        | 0.540<br>$\pm 0.044$ |
|         | BAcc             | 0.212<br>$\pm 0.041$        | 0.198<br>$\pm 0.023$        | 0.236<br>$\pm 0.065$        | 0.174<br>$\pm 0.020$        | 0.164<br>$\pm 0.037$ | 0.105<br>$\pm 0.023$  | 0.148<br>$\pm 0.040$ | 0.133<br>$\pm 0.042$  | 0.121<br>$\pm 0.033$  | 0.117<br>$\pm 0.036$  | 0.155<br>$\pm 0.022$  | 0.136<br>$\pm 0.047$  | 0.143<br>$\pm 0.040$  | 0.086<br>$\pm 0.018$  | <b>0.214</b><br>$\pm 0.022$ | 0.169<br>$\pm 0.037$  | 0.207<br>$\pm 0.025$        | 0.148<br>$\pm 0.032$ | 0.200<br>$\pm 0.027$        | 0.152<br>$\pm 0.030$ |
|         | Acc <sub>1</sub> | 0.212<br>$\pm 0.041$        | 0.198<br>$\pm 0.023$        | 0.236<br>$\pm 0.065$        | 0.174<br>$\pm 0.020$        | 0.164<br>$\pm 0.037$ | 0.105<br>$\pm 0.023$  | 0.148<br>$\pm 0.040$ | 0.133<br>$\pm 0.042$  | 0.121<br>$\pm 0.033$  | 0.114<br>$\pm 0.040$  | 0.155<br>$\pm 0.024$  | 0.131<br>$\pm 0.043$  | 0.143<br>$\pm 0.040$  | 0.086<br>$\pm 0.018$  | <b>0.214</b><br>$\pm 0.022$ | 0.169<br>$\pm 0.037$  | 0.210<br>$\pm 0.023$        | 0.144<br>$\pm 0.034$ | 0.203<br>$\pm 0.028$        | 0.148<br>$\pm 0.034$ |
|         | Acc <sub>2</sub> | 0.379<br>$\pm 0.070$        | 0.360<br>$\pm 0.021$        | <b>0.374</b><br>$\pm 0.035$ | 0.348<br>$\pm 0.037$        | 0.281<br>$\pm 0.048$ | 0.236<br>$\pm 0.033$  | 0.302<br>$\pm 0.057$ | 0.274<br>$\pm 0.065$  | 0.271<br>$\pm 0.031$  | 0.257<br>$\pm 0.054$  | 0.324<br>$\pm 0.037$  | 0.300<br>$\pm 0.024$  | 0.293<br>$\pm 0.072$  | 0.231<br>$\pm 0.042$  | <b>0.374</b><br>$\pm 0.018$ | 0.329<br>$\pm 0.058$  | 0.353<br>$\pm 0.045$        | 0.306<br>$\pm 0.038$ | 0.371<br>$\pm 0.038$        | 0.312<br>$\pm 0.052$ |

Continued on next page

| SubjectMetric          |          | DeepConvnet          | EEGNet               | Conformer            | CTNet                | BIOT (f)              | BIOT (l)              | BENDR (f)             | BENDR (l)            | CBraMod (f)           | CBraMod (l)           | EEGPT (f)             | EEGPT (l)             | LaBraM (f)            | LaBraM (l)            | STEEGformer-s (f)     | STEEGformer-s (l)     | STEEGformer-b (f)     | STEEGformer-b (l)     | STEEGformer-l (f)     | STEEGformer-l (l)    |
|------------------------|----------|----------------------|----------------------|----------------------|----------------------|-----------------------|-----------------------|-----------------------|----------------------|-----------------------|-----------------------|-----------------------|-----------------------|-----------------------|-----------------------|-----------------------|-----------------------|-----------------------|-----------------------|-----------------------|----------------------|
| sub12                  | $\kappa$ | 0.108<br>$\pm 0.076$ | 0.131<br>$\pm 0.071$ | 0.128<br>$\pm 0.064$ | 0.075<br>$\pm 0.081$ | -0.028<br>$\pm 0.064$ | -0.014<br>$\pm 0.035$ | 0.067<br>$\pm 0.039$  | 0.050<br>$\pm 0.030$ | -0.022<br>$\pm 0.051$ | -0.075<br>$\pm 0.029$ | -0.014<br>$\pm 0.060$ | -0.011<br>$\pm 0.045$ | -0.031<br>$\pm 0.079$ | -0.044<br>$\pm 0.033$ | 0.075<br>$\pm 0.049$  | 0.011<br>$\pm 0.037$  | 0.075<br>$\pm 0.056$  | 0.028<br>$\pm 0.028$  | 0.100<br>$\pm 0.068$  | 0.022<br>$\pm 0.050$ |
|                        | AUC      | 0.619<br>$\pm 0.047$ | 0.629<br>$\pm 0.041$ | 0.621<br>$\pm 0.034$ | 0.587<br>$\pm 0.045$ | 0.461<br>$\pm 0.035$  | 0.494<br>$\pm 0.036$  | 0.565<br>$\pm 0.028$  | 0.527<br>$\pm 0.027$ | 0.471<br>$\pm 0.043$  | 0.434<br>$\pm 0.016$  | 0.478<br>$\pm 0.051$  | 0.513<br>$\pm 0.063$  | 0.486<br>$\pm 0.049$  | 0.449<br>$\pm 0.038$  | 0.568<br>$\pm 0.039$  | 0.502<br>$\pm 0.022$  | 0.550<br>$\pm 0.015$  | 0.510<br>$\pm 0.026$  | 0.574<br>$\pm 0.037$  | 0.494<br>$\pm 0.034$ |
|                        | BAcc     | 0.236<br>$\pm 0.065$ | 0.255<br>$\pm 0.061$ | 0.252<br>$\pm 0.055$ | 0.207<br>$\pm 0.070$ | 0.119<br>$\pm 0.055$  | 0.131<br>$\pm 0.030$  | 0.200<br>$\pm 0.033$  | 0.186<br>$\pm 0.026$ | 0.124<br>$\pm 0.043$  | 0.079<br>$\pm 0.025$  | 0.131<br>$\pm 0.051$  | 0.133<br>$\pm 0.039$  | 0.117<br>$\pm 0.068$  | 0.105<br>$\pm 0.028$  | 0.207<br>$\pm 0.042$  | 0.152<br>$\pm 0.032$  | 0.207<br>$\pm 0.048$  | 0.167<br>$\pm 0.024$  | 0.229<br>$\pm 0.059$  | 0.162<br>$\pm 0.043$ |
|                        | Acc.1    | 0.236<br>$\pm 0.065$ | 0.255<br>$\pm 0.061$ | 0.252<br>$\pm 0.055$ | 0.207<br>$\pm 0.070$ | 0.119<br>$\pm 0.055$  | 0.131<br>$\pm 0.030$  | 0.200<br>$\pm 0.033$  | 0.186<br>$\pm 0.026$ | 0.124<br>$\pm 0.043$  | 0.079<br>$\pm 0.025$  | 0.127<br>$\pm 0.059$  | 0.125<br>$\pm 0.039$  | 0.117<br>$\pm 0.068$  | 0.105<br>$\pm 0.028$  | 0.207<br>$\pm 0.042$  | 0.152<br>$\pm 0.032$  | 0.212<br>$\pm 0.045$  | 0.160<br>$\pm 0.020$  | 0.234<br>$\pm 0.065$  | 0.159<br>$\pm 0.044$ |
|                        | Acc.2    | 0.393<br>$\pm 0.095$ | 0.424<br>$\pm 0.052$ | 0.436<br>$\pm 0.036$ | 0.383<br>$\pm 0.062$ | 0.212<br>$\pm 0.035$  | 0.257<br>$\pm 0.037$  | 0.352<br>$\pm 0.030$  | 0.340<br>$\pm 0.045$ | 0.231<br>$\pm 0.062$  | 0.205<br>$\pm 0.028$  | 0.269<br>$\pm 0.068$  | 0.280<br>$\pm 0.065$  | 0.236<br>$\pm 0.064$  | 0.219<br>$\pm 0.045$  | 0.374<br>$\pm 0.050$  | 0.302<br>$\pm 0.058$  | 0.319<br>$\pm 0.028$  | 0.331<br>$\pm 0.043$  | 0.380<br>$\pm 0.069$  | 0.272<br>$\pm 0.057$ |
|                        | sub13    | $\kappa$             | 0.078<br>$\pm 0.056$ | 0.072<br>$\pm 0.078$ | 0.089<br>$\pm 0.069$ | 0.069<br>$\pm 0.086$  | -0.017<br>$\pm 0.066$ | -0.028<br>$\pm 0.049$ | 0.028<br>$\pm 0.035$ | 0.008<br>$\pm 0.036$  | -0.036<br>$\pm 0.021$ | -0.036<br>$\pm 0.021$ | 0.003<br>$\pm 0.041$  | 0.031<br>$\pm 0.043$  | -0.017<br>$\pm 0.018$ | -0.031<br>$\pm 0.030$ | -0.003<br>$\pm 0.043$ | 0.031<br>$\pm 0.059$  | -0.017<br>$\pm 0.049$ | -0.014<br>$\pm 0.010$ | 0.033<br>$\pm 0.071$ |
| AUC                    |          | 0.620<br>$\pm 0.019$ | 0.583<br>$\pm 0.033$ | 0.574<br>$\pm 0.038$ | 0.588<br>$\pm 0.034$ | 0.495<br>$\pm 0.036$  | 0.479<br>$\pm 0.037$  | 0.555<br>$\pm 0.029$  | 0.508<br>$\pm 0.024$ | 0.458<br>$\pm 0.017$  | 0.446<br>$\pm 0.011$  | 0.520<br>$\pm 0.053$  | 0.532<br>$\pm 0.018$  | 0.461<br>$\pm 0.014$  | 0.492<br>$\pm 0.046$  | 0.495<br>$\pm 0.027$  | 0.520<br>$\pm 0.064$  | 0.511<br>$\pm 0.052$  | 0.508<br>$\pm 0.053$  | 0.519<br>$\pm 0.043$  | 0.527<br>$\pm 0.069$ |
| BAcc                   |          | 0.210<br>$\pm 0.048$ | 0.205<br>$\pm 0.067$ | 0.219<br>$\pm 0.059$ | 0.202<br>$\pm 0.074$ | 0.129<br>$\pm 0.057$  | 0.119<br>$\pm 0.042$  | 0.167<br>$\pm 0.030$  | 0.150<br>$\pm 0.031$ | 0.112<br>$\pm 0.018$  | 0.112<br>$\pm 0.018$  | 0.145<br>$\pm 0.035$  | 0.169<br>$\pm 0.037$  | 0.129<br>$\pm 0.016$  | 0.117<br>$\pm 0.026$  | 0.140<br>$\pm 0.037$  | 0.169<br>$\pm 0.051$  | 0.129<br>$\pm 0.042$  | 0.131<br>$\pm 0.008$  | 0.171<br>$\pm 0.061$  | 0.157<br>$\pm 0.053$ |
| Acc.1                  |          | 0.210<br>$\pm 0.048$ | 0.205<br>$\pm 0.067$ | 0.219<br>$\pm 0.059$ | 0.202<br>$\pm 0.074$ | 0.129<br>$\pm 0.057$  | 0.119<br>$\pm 0.042$  | 0.167<br>$\pm 0.030$  | 0.150<br>$\pm 0.031$ | 0.112<br>$\pm 0.018$  | 0.112<br>$\pm 0.018$  | 0.150<br>$\pm 0.035$  | 0.174<br>$\pm 0.047$  | 0.129<br>$\pm 0.016$  | 0.117<br>$\pm 0.026$  | 0.140<br>$\pm 0.037$  | 0.169<br>$\pm 0.051$  | 0.130<br>$\pm 0.042$  | 0.132<br>$\pm 0.009$  | 0.169<br>$\pm 0.062$  | 0.159<br>$\pm 0.047$ |
| Acc.2                  |          | 0.395<br>$\pm 0.013$ | 0.357<br>$\pm 0.071$ | 0.357<br>$\pm 0.065$ | 0.381<br>$\pm 0.044$ | 0.279<br>$\pm 0.061$  | 0.267<br>$\pm 0.031$  | 0.348<br>$\pm 0.016$  | 0.298<br>$\pm 0.033$ | 0.252<br>$\pm 0.040$  | 0.229<br>$\pm 0.028$  | 0.316<br>$\pm 0.079$  | 0.327<br>$\pm 0.017$  | 0.262<br>$\pm 0.024$  | 0.255<br>$\pm 0.027$  | 0.286<br>$\pm 0.039$  | 0.302<br>$\pm 0.068$  | 0.304<br>$\pm 0.074$  | 0.297<br>$\pm 0.021$  | 0.308<br>$\pm 0.053$  | 0.301<br>$\pm 0.054$ |
| sub14                  |          | $\kappa$             | 0.069<br>$\pm 0.044$ | 0.103<br>$\pm 0.061$ | 0.103<br>$\pm 0.025$ | 0.069<br>$\pm 0.045$  | -0.008<br>$\pm 0.021$ | 0.000<br>$\pm 0.014$  | 0.014<br>$\pm 0.047$ | -0.017<br>$\pm 0.057$ | -0.067<br>$\pm 0.025$ | -0.086<br>$\pm 0.032$ | -0.000<br>$\pm 0.031$ | 0.008<br>$\pm 0.027$  | -0.053<br>$\pm 0.035$ | -0.047<br>$\pm 0.008$ | 0.006<br>$\pm 0.056$  | -0.000<br>$\pm 0.056$ | 0.050<br>$\pm 0.029$  | 0.031<br>$\pm 0.049$  | 0.053<br>$\pm 0.048$ |
|                        | AUC      | 0.607<br>$\pm 0.022$ | 0.605<br>$\pm 0.003$ | 0.603<br>$\pm 0.017$ | 0.591<br>$\pm 0.021$ | 0.506<br>$\pm 0.027$  | 0.477<br>$\pm 0.030$  | 0.533<br>$\pm 0.052$  | 0.499<br>$\pm 0.061$ | 0.416<br>$\pm 0.022$  | 0.429<br>$\pm 0.012$  | 0.514<br>$\pm 0.019$  | 0.525<br>$\pm 0.043$  | 0.438<br>$\pm 0.017$  | 0.420<br>$\pm 0.035$  | 0.509<br>$\pm 0.023$  | 0.478<br>$\pm 0.027$  | 0.530<br>$\pm 0.021$  | 0.498<br>$\pm 0.015$  | 0.541<br>$\pm 0.022$  | 0.491<br>$\pm 0.034$ |
|                        | BAcc     | 0.202<br>$\pm 0.038$ | 0.231<br>$\pm 0.052$ | 0.231<br>$\pm 0.022$ | 0.202<br>$\pm 0.039$ | 0.136<br>$\pm 0.018$  | 0.143<br>$\pm 0.012$  | 0.155<br>$\pm 0.040$  | 0.129<br>$\pm 0.049$ | 0.086<br>$\pm 0.021$  | 0.069<br>$\pm 0.027$  | 0.143<br>$\pm 0.027$  | 0.150<br>$\pm 0.023$  | 0.098<br>$\pm 0.030$  | 0.102<br>$\pm 0.007$  | 0.148<br>$\pm 0.048$  | 0.143<br>$\pm 0.048$  | 0.186<br>$\pm 0.025$  | 0.169<br>$\pm 0.042$  | 0.188<br>$\pm 0.041$  | 0.155<br>$\pm 0.046$ |
|                        | Acc.1    | 0.202<br>$\pm 0.038$ | 0.231<br>$\pm 0.052$ | 0.231<br>$\pm 0.022$ | 0.202<br>$\pm 0.039$ | 0.136<br>$\pm 0.018$  | 0.143<br>$\pm 0.012$  | 0.155<br>$\pm 0.040$  | 0.129<br>$\pm 0.049$ | 0.086<br>$\pm 0.021$  | 0.069<br>$\pm 0.027$  | 0.138<br>$\pm 0.025$  | 0.146<br>$\pm 0.023$  | 0.098<br>$\pm 0.030$  | 0.102<br>$\pm 0.007$  | 0.148<br>$\pm 0.048$  | 0.140<br>$\pm 0.049$  | 0.190<br>$\pm 0.022$  | 0.179<br>$\pm 0.043$  | 0.191<br>$\pm 0.040$  | 0.157<br>$\pm 0.041$ |
|                        | Acc.2    | 0.398<br>$\pm 0.054$ | 0.393<br>$\pm 0.017$ | 0.407<br>$\pm 0.043$ | 0.410<br>$\pm 0.035$ | 0.260<br>$\pm 0.033$  | 0.257<br>$\pm 0.023$  | 0.321<br>$\pm 0.071$  | 0.288<br>$\pm 0.068$ | 0.195<br>$\pm 0.025$  | 0.183<br>$\pm 0.031$  | 0.282<br>$\pm 0.033$  | 0.329<br>$\pm 0.047$  | 0.219<br>$\pm 0.042$  | 0.210<br>$\pm 0.029$  | 0.295<br>$\pm 0.046$  | 0.267<br>$\pm 0.038$  | 0.328<br>$\pm 0.028$  | 0.321<br>$\pm 0.030$  | 0.340<br>$\pm 0.055$  | 0.285<br>$\pm 0.026$ |
|                        | sub15    | $\kappa$             | 0.111<br>$\pm 0.029$ | 0.072<br>$\pm 0.057$ | 0.108<br>$\pm 0.065$ | 0.119<br>$\pm 0.012$  | -0.017<br>$\pm 0.042$ | 0.000<br>$\pm 0.043$  | 0.067<br>$\pm 0.041$ | 0.006<br>$\pm 0.045$  | -0.061<br>$\pm 0.052$ | -0.053<br>$\pm 0.041$ | 0.008<br>$\pm 0.045$  | -0.022<br>$\pm 0.042$ | -0.022<br>$\pm 0.065$ | -0.014<br>$\pm 0.049$ | 0.097<br>$\pm 0.066$  | 0.000<br>$\pm 0.024$  | 0.067<br>$\pm 0.049$  | 0.044<br>$\pm 0.062$  | 0.111<br>$\pm 0.068$ |
| Continued on next page |          |                      |                      |                      |                      |                       |                       |                       |                      |                       |                       |                       |                       |                       |                       |                       |                       |                       |                       |                       |                      |

Continued on next page

| Subject | Metric   | DeepConvnet                    | EEGNet                         | Conformer                      | CTNet                          | BIOT (f)         | BIOT (l)         | BENDR (f)       | BENDR (l)       | CBraMod (f)      | CBraMod (l)      | EEGPT (f)        | EEGPT (l)        | LaBraM (f)       | LaBraM (l)       | STEEGformer-s (f) | STEEGformer-s (l) | STEEGformer-b (f) | STEEGformer-b (l) | STEEGformer-l (f)              | STEEGformer-l (l) |      |  |
|---------|----------|--------------------------------|--------------------------------|--------------------------------|--------------------------------|------------------|------------------|-----------------|-----------------|------------------|------------------|------------------|------------------|------------------|------------------|-------------------|-------------------|-------------------|-------------------|--------------------------------|-------------------|------|--|
|         |          |                                |                                |                                |                                |                  |                  |                 |                 |                  |                  |                  |                  |                  |                  |                   |                   |                   |                   |                                |                   |      |  |
|         | AUC      | 0.605<br>±0.026                | 0.597<br>±0.015                | 0.614<br>±0.036                | <b>0.612</b><br>± <b>0.037</b> | 0.508<br>±0.021  | 0.493<br>±0.047  | 0.566<br>±0.033 | 0.515<br>±0.030 | 0.431<br>±0.032  | 0.431<br>±0.027  | 0.516<br>±0.023  | 0.495<br>±0.028  | 0.452<br>±0.035  | 0.473<br>±0.047  | 0.598<br>±0.040   | 0.525<br>±0.025   | 0.573<br>±0.041   | 0.523<br>±0.043   | 0.588<br>±0.050                | 0.527<br>±0.044   | 3075 |  |
|         | BAcc     | 0.238<br>±0.025                | 0.205<br>±0.049                | 0.236<br>±0.055                | 0.245<br>±0.011                | 0.129<br>±0.036  | 0.143<br>±0.037  | 0.200<br>±0.035 | 0.148<br>±0.038 | 0.090<br>±0.044  | 0.098<br>±0.035  | 0.150<br>±0.038  | 0.124<br>±0.036  | 0.124<br>±0.056  | 0.131<br>±0.042  | 0.226<br>±0.056   | 0.143<br>±0.021   | 0.200<br>±0.042   | 0.181<br>±0.053   | <b>0.238</b><br>± <b>0.058</b> | 0.129<br>±0.028   | 3076 |  |
|         | Acc.1    | 0.238<br>±0.025                | 0.205<br>±0.049                | 0.236<br>±0.055                | 0.245<br>±0.011                | 0.129<br>±0.036  | 0.143<br>±0.037  | 0.200<br>±0.035 | 0.148<br>±0.038 | 0.090<br>±0.044  | 0.098<br>±0.035  | 0.147<br>±0.038  | 0.122<br>±0.039  | 0.124<br>±0.056  | 0.131<br>±0.042  | 0.226<br>±0.056   | 0.143<br>±0.021   | 0.205<br>±0.046   | 0.185<br>±0.054   | <b>0.241</b><br>± <b>0.064</b> | 0.135<br>±0.026   | 3077 |  |
|         | Acc.2    | 0.402<br>±0.047                | 0.400<br>±0.018                | <b>0.414</b><br>± <b>0.027</b> | 0.421<br>±0.052                | 0.302<br>±0.053  | 0.274<br>±0.071  | 0.336<br>±0.023 | 0.329<br>±0.040 | 0.226<br>±0.050  | 0.217<br>±0.043  | 0.305<br>±0.056  | 0.278<br>±0.072  | 0.255<br>±0.057  | 0.276<br>±0.072  | 0.400<br>±0.085   | 0.293<br>±0.033   | 0.398<br>±0.053   | 0.339<br>±0.065   | 0.390<br>±0.055                | 0.276<br>±0.053   | 3078 |  |
|         | $\kappa$ | <b>0.111</b><br>± <b>0.035</b> | 0.033<br>±0.036                | 0.119<br>±0.056                | 0.042<br>±0.037                | 0.058<br>±0.060  | -0.011<br>±0.025 | 0.064<br>±0.066 | 0.008<br>±0.019 | -0.022<br>±0.047 | -0.003<br>±0.015 | 0.028<br>±0.017  | -0.022<br>±0.029 | 0.003<br>±0.006  | 0.022<br>±0.025  | 0.078<br>±0.045   | 0.011<br>±0.032   | 0.103<br>±0.054   | -0.006<br>±0.035  | 0.106<br>±0.081                | 0.006<br>±0.035   | 3079 |  |
| sub2    | AUC      | 0.609<br>±0.031                | <b>0.596</b><br>± <b>0.026</b> | 0.593<br>±0.029                | 0.569<br>±0.023                | 0.539<br>±0.033  | 0.477<br>±0.025  | 0.541<br>±0.045 | 0.499<br>±0.026 | 0.459<br>±0.023  | 0.470<br>±0.033  | 0.523<br>±0.026  | 0.475<br>±0.018  | 0.499<br>±0.054  | 0.477<br>±0.023  | 0.573<br>±0.027   | 0.513<br>±0.021   | 0.568<br>±0.034   | 0.515<br>±0.020   | 0.573<br>±0.029                | 0.505<br>±0.015   | 3080 |  |
|         | BAcc     | <b>0.238</b><br>± <b>0.030</b> | 0.171<br>±0.031                | 0.245<br>±0.048                | 0.179<br>±0.031                | 0.193<br>±0.051  | 0.133<br>±0.021  | 0.198<br>±0.056 | 0.150<br>±0.016 | 0.124<br>±0.040  | 0.140<br>±0.013  | 0.167<br>±0.015  | 0.124<br>±0.025  | 0.145<br>±0.005  | 0.162<br>±0.022  | 0.210<br>±0.038   | 0.152<br>±0.027   | 0.231<br>±0.047   | 0.138<br>±0.030   | 0.233<br>±0.070                | 0.148<br>±0.030   | 3081 |  |
|         | Acc.1    | <b>0.238</b><br>± <b>0.030</b> | 0.171<br>±0.031                | 0.245<br>±0.048                | 0.181<br>±0.027                | 0.193<br>±0.051  | 0.133<br>±0.021  | 0.198<br>±0.056 | 0.150<br>±0.016 | 0.124<br>±0.040  | 0.138<br>±0.018  | 0.168<br>±0.009  | 0.118<br>±0.026  | 0.143<br>±0.008  | 0.162<br>±0.022  | 0.210<br>±0.038   | 0.152<br>±0.027   | 0.226<br>±0.042   | 0.142<br>±0.029   | 0.237<br>±0.075                | 0.155<br>±0.028   | 3082 |  |
|         | Acc.2    | <b>0.405</b><br>± <b>0.027</b> | 0.386<br>±0.051                | 0.421<br>±0.053                | 0.348<br>±0.031                | 0.321<br>±0.061  | 0.281<br>±0.042  | 0.350<br>±0.057 | 0.286<br>±0.028 | 0.260<br>±0.062  | 0.295<br>±0.016  | 0.310<br>±0.029  | 0.268<br>±0.037  | 0.295<br>±0.021  | 0.286<br>±0.021  | 0.376<br>±0.034   | 0.302<br>±0.047   | 0.358<br>±0.065   | 0.302<br>±0.037   | 0.355<br>±0.048                | 0.308<br>±0.025   | 3083 |  |
|         | $\kappa$ | 0.053<br>±0.084                | <b>0.064</b><br>± <b>0.056</b> | 0.050<br>±0.029                | 0.019<br>±0.052                | -0.008<br>±0.049 | -0.006<br>±0.038 | 0.025<br>±0.042 | 0.008<br>±0.054 | -0.036<br>±0.040 | -0.078<br>±0.042 | 0.022<br>±0.085  | -0.025<br>±0.030 | 0.003<br>±0.032  | -0.053<br>±0.048 | 0.036<br>±0.052   | -0.042<br>±0.031  | 0.056<br>±0.056   | -0.017<br>±0.062  | 0.081<br>±0.036                | -0.022<br>±0.038  | 3084 |  |
| sub3    | AUC      | <b>0.558</b><br>± <b>0.036</b> | 0.557<br>±0.039                | 0.535<br>±0.022                | 0.536<br>±0.047                | 0.501<br>±0.034  | 0.494<br>±0.034  | 0.504<br>±0.041 | 0.541<br>±0.033 | 0.457<br>±0.025  | 0.439<br>±0.025  | 0.511<br>±0.049  | 0.497<br>±0.048  | 0.498<br>±0.034  | 0.440<br>±0.028  | 0.543<br>±0.031   | 0.487<br>±0.032   | 0.548<br>±0.044   | 0.490<br>±0.045   | 0.581<br>±0.028                | 0.505<br>±0.038   | 3085 |  |
|         | BAcc     | 0.188<br>±0.072                | <b>0.198</b><br>± <b>0.048</b> | 0.186<br>±0.025                | 0.160<br>±0.044                | 0.136<br>±0.042  | 0.138<br>±0.032  | 0.164<br>±0.036 | 0.150<br>±0.047 | 0.112<br>±0.034  | 0.076<br>±0.036  | 0.162<br>±0.073  | 0.121<br>±0.026  | 0.145<br>±0.027  | 0.098<br>±0.041  | 0.174<br>±0.044   | 0.107<br>±0.027   | 0.190<br>±0.048   | 0.129<br>±0.053   | 0.212<br>±0.031                | 0.124<br>±0.032   | 3086 |  |
|         | Acc.1    | 0.188<br>±0.072                | <b>0.198</b><br>± <b>0.048</b> | 0.186<br>±0.025                | 0.160<br>±0.044                | 0.136<br>±0.042  | 0.138<br>±0.032  | 0.164<br>±0.036 | 0.150<br>±0.047 | 0.112<br>±0.034  | 0.076<br>±0.036  | 0.160<br>±0.070  | 0.120<br>±0.030  | 0.145<br>±0.027  | 0.098<br>±0.041  | 0.174<br>±0.044   | 0.105<br>±0.023   | 0.197<br>±0.053   | 0.130<br>±0.056   | 0.219<br>±0.036                | 0.125<br>±0.026   | 3087 |  |
|         | Acc.2    | <b>0.340</b><br>± <b>0.071</b> | <b>0.340</b><br>± <b>0.056</b> | 0.331<br>±0.026                | 0.319<br>±0.069                | 0.279<br>±0.048  | 0.262<br>±0.028  | 0.310<br>±0.039 | 0.319<br>±0.057 | 0.238<br>±0.021  | 0.195<br>±0.048  | 0.307<br>±0.081  | 0.276<br>±0.071  | 0.288<br>±0.057  | 0.233<br>±0.025  | 0.312<br>±0.035   | 0.279<br>±0.044   | 0.307<br>±0.055   | 0.300<br>±0.056   | 0.362<br>±0.056                | 0.304<br>±0.024   | 3088 |  |
|         | $\kappa$ | 0.128<br>±0.036                | 0.153<br>±0.055                | <b>0.183</b><br>± <b>0.048</b> | 0.186<br>±0.055                | 0.025<br>±0.058  | -0.042<br>±0.052 | 0.097<br>±0.066 | 0.039<br>±0.036 | 0.053<br>±0.046  | 0.008<br>±0.021  | -0.075<br>±0.053 | 0.064<br>±0.073  | -0.006<br>±0.027 | -0.047<br>±0.036 | 0.119<br>±0.122   | 0.017<br>±0.023   | 0.106<br>±0.053   | 0.039<br>±0.032   | 0.169<br>±0.058                | 0.053<br>±0.039   | 3089 |  |
| sub4    | AUC      | 0.636<br>±0.029                | <b>0.639</b><br>± <b>0.027</b> | 0.661<br>±0.030                | 0.625<br>±0.024                | 0.524<br>±0.037  | 0.488<br>±0.044  | 0.595<br>±0.034 | 0.535<br>±0.030 | 0.558<br>±0.027  | 0.464<br>±0.041  | 0.482<br>±0.032  | 0.540<br>±0.057  | 0.477<br>±0.035  | 0.469<br>±0.033  | 0.600<br>±0.061   | 0.501<br>±0.020   | 0.588<br>±0.033   | 0.525<br>±0.032   | 0.627<br>±0.027                | 0.530<br>±0.020   | 3090 |  |
|         |          |                                |                                |                                |                                |                  |                  |                 |                 |                  |                  |                  |                  |                  |                  |                   |                   |                   |                   |                                |                   | 3091 |  |
|         |          |                                |                                |                                |                                |                  |                  |                 |                 |                  |                  |                  |                  |                  |                  |                   |                   |                   |                   |                                |                   | 3092 |  |
|         |          |                                |                                |                                |                                |                  |                  |                 |                 |                  |                  |                  |                  |                  |                  |                   |                   |                   |                   |                                |                   | 3093 |  |
|         |          |                                |                                |                                |                                |                  |                  |                 |                 |                  |                  |                  |                  |                  |                  |                   |                   |                   |                   |                                |                   | 3094 |  |
|         |          |                                |                                |                                |                                |                  |                  |                 |                 |                  |                  |                  |                  |                  |                  |                   |                   |                   |                   |                                |                   | 3095 |  |
|         |          |                                |                                |                                |                                |                  |                  |                 |                 |                  |                  |                  |                  |                  |                  |                   |                   |                   |                   |                                |                   | 3096 |  |
|         |          |                                |                                |                                |                                |                  |                  |                 |                 |                  |                  |                  |                  |                  |                  |                   |                   |                   |                   |                                |                   | 3097 |  |
|         |          |                                |                                |                                |                                |                  |                  |                 |                 |                  |                  |                  |                  |                  |                  |                   |                   |                   |                   |                                |                   | 3098 |  |
|         |          |                                |                                |                                |                                |                  |                  |                 |                 |                  |                  |                  |                  |                  |                  |                   |                   |                   |                   |                                |                   | 3099 |  |
|         |          |                                |                                |                                |                                |                  |                  |                 |                 |                  |                  |                  |                  |                  |                  |                   |                   |                   |                   |                                |                   | 3100 |  |
|         |          |                                |                                |                                |                                |                  |                  |                 |                 |                  |                  |                  |                  |                  |                  |                   |                   |                   |                   |                                |                   | 3101 |  |
|         |          |                                |                                |                                |                                |                  |                  |                 |                 |                  |                  |                  |                  |                  |                  |                   |                   |                   |                   |                                |                   | 3102 |  |
|         |          |                                |                                |                                |                                |                  |                  |                 |                 |                  |                  |                  |                  |                  |                  |                   |                   |                   |                   |                                |                   | 3103 |  |
|         |          |                                |                                |                                |                                |                  |                  |                 |                 |                  |                  |                  |                  |                  |                  |                   |                   |                   |                   |                                |                   | 3104 |  |
|         |          |                                |                                |                                |                                |                  |                  |                 |                 |                  |                  |                  |                  |                  |                  |                   |                   |                   |                   |                                |                   | 3105 |  |
|         |          |                                |                                |                                |                                |                  |                  |                 |                 |                  |                  |                  |                  |                  |                  |                   |                   |                   |                   |                                |                   | 3106 |  |
|         |          |                                |                                |                                |                                |                  |                  |                 |                 |                  |                  |                  |                  |                  |                  |                   |                   |                   |                   |                                |                   | 3107 |  |

Continued on next page

| SubjectMetric |          | DeepConvnet                    | EEGNet                         | Conformer                      | CTNet            | BIOT (f)        | BIOT (l)         | BENDR (f)       | BENDR (l)        | CBraMod (f)      | CBraMod (l)      | EEGPT (f)       | EEGPT (l)        | LaBraM (f)       | LaBraM (l)       | STEEGformer-s (f)              | STEEGformer-s (l) | STEEGformer-b (f)              | STEEGformer-b (l) | STEEGformer-l (f)              | STEEGformer-l (l) |
|---------------|----------|--------------------------------|--------------------------------|--------------------------------|------------------|-----------------|------------------|-----------------|------------------|------------------|------------------|-----------------|------------------|------------------|------------------|--------------------------------|-------------------|--------------------------------|-------------------|--------------------------------|-------------------|
| sub5          | BAcc     | 0.252<br>±0.031                | 0.274<br>±0.047                | <b>0.300</b><br>± <b>0.041</b> | 0.302<br>± 0.047 | 0.164<br>±0.049 | 0.107<br>±0.045  | 0.226<br>±0.056 | 0.176<br>±0.031  | 0.188<br>±0.040  | 0.150<br>±0.018  | 0.079<br>±0.045 | 0.198<br>±0.062  | 0.138<br>±0.023  | 0.102<br>±0.031  | 0.245<br>±0.104                | 0.157<br>±0.020   | 0.233<br>±0.045                | 0.176<br>±0.027   | 0.288<br>±0.050                | 0.188<br>±0.033   |
|               | Acc_1    | 0.252<br>±0.031                | 0.274<br>±0.047                | <b>0.300</b><br>± <b>0.041</b> | 0.302<br>± 0.047 | 0.164<br>±0.049 | 0.107<br>±0.045  | 0.226<br>±0.056 | 0.176<br>±0.031  | 0.188<br>±0.040  | 0.150<br>±0.018  | 0.084<br>±0.048 | 0.199<br>±0.064  | 0.138<br>±0.023  | 0.100<br>±0.030  | 0.245<br>±0.104                | 0.157<br>±0.020   | 0.234<br>±0.035                | 0.182<br>±0.024   | 0.287<br>±0.051                | 0.190<br>±0.032   |
|               | Acc_2    | 0.438<br>±0.053                | <b>0.469</b><br>± <b>0.051</b> | 0.493<br>± 0.043               | 0.443<br>±0.041  | 0.283<br>±0.049 | 0.267<br>±0.073  | 0.400<br>±0.034 | 0.345<br>±0.055  | 0.350<br>±0.058  | 0.298<br>±0.022  | 0.275<br>±0.067 | 0.327<br>±0.056  | 0.279<br>±0.025  | 0.236<br>±0.021  | 0.419<br>±0.109                | 0.290<br>±0.030   | 0.389<br>±0.025                | 0.320<br>±0.034   | 0.435<br>±0.027                | 0.349<br>±0.015   |
|               | $\kappa$ | 0.033<br>±0.038                | 0.061<br>±0.038                | 0.061<br>±0.047                | 0.003<br>±0.030  | 0.022<br>±0.035 | 0.022<br>±0.029  | 0.053<br>±0.036 | 0.008<br>±0.063  | 0.019<br>±0.035  | -0.033<br>±0.016 | 0.000<br>±0.026 | -0.014<br>±0.060 | -0.036<br>±0.029 | -0.042<br>±0.040 | <b>0.064</b><br>± <b>0.071</b> | 0.017<br>±0.054   | 0.078<br>± 0.053               | 0.022<br>±0.029   | 0.056<br>±0.045                | 0.025<br>±0.040   |
|               | AUC      | 0.560<br>±0.026                | 0.548<br>±0.031                | 0.569<br>±0.043                | 0.504<br>±0.027  | 0.534<br>±0.035 | 0.493<br>±0.011  | 0.515<br>±0.037 | 0.524<br>±0.027  | 0.484<br>±0.043  | 0.431<br>±0.017  | 0.479<br>±0.029 | 0.478<br>±0.044  | 0.439<br>±0.029  | 0.444<br>±0.008  | 0.546<br>±0.067                | 0.530<br>±0.050   | 0.575<br>± 0.017               | 0.541<br>±0.044   | <b>0.570</b><br>± <b>0.042</b> | 0.550<br>±0.062   |
|               | BAcc     | 0.171<br>±0.032                | 0.195<br>±0.032                | 0.195<br>±0.040                | 0.145<br>±0.026  | 0.162<br>±0.030 | 0.162<br>±0.025  | 0.188<br>±0.031 | 0.150<br>±0.054  | 0.160<br>±0.030  | 0.114<br>±0.014  | 0.143<br>±0.022 | 0.131<br>±0.051  | 0.112<br>±0.025  | 0.107<br>±0.035  | <b>0.198</b><br>± <b>0.061</b> | 0.157<br>±0.046   | 0.210<br>± 0.045               | 0.162<br>±0.025   | 0.190<br>±0.039                | 0.164<br>±0.034   |
| sub6          | Acc_1    | 0.171<br>±0.032                | 0.195<br>±0.032                | 0.195<br>±0.040                | 0.145<br>±0.026  | 0.162<br>±0.030 | 0.162<br>±0.025  | 0.188<br>±0.031 | 0.150<br>±0.054  | 0.160<br>±0.030  | 0.114<br>±0.023  | 0.141<br>±0.028 | 0.132<br>±0.053  | 0.110<br>±0.026  | 0.107<br>±0.035  | <b>0.198</b><br>± <b>0.061</b> | 0.157<br>±0.046   | 0.212<br>± 0.056               | 0.159<br>±0.023   | 0.190<br>±0.036                | 0.171<br>±0.045   |
|               | Acc_2    | 0.336<br>±0.028                | 0.345<br>±0.064                | 0.355<br>±0.031                | 0.305<br>±0.018  | 0.312<br>±0.049 | 0.290<br>±0.034  | 0.298<br>±0.036 | 0.307<br>±0.053  | 0.274<br>±0.040  | 0.262<br>±0.030  | 0.267<br>±0.068 | 0.247<br>±0.069  | 0.267<br>±0.032  | 0.224<br>±0.031  | 0.362<br>±0.084                | 0.314<br>±0.037   | <b>0.368</b><br>± <b>0.033</b> | 0.320<br>±0.029   | 0.380<br>± 0.079               | 0.339<br>±0.039   |
|               | $\kappa$ | 0.092<br>±0.047                | 0.103<br>±0.054                | 0.122<br>±0.055                | 0.078<br>±0.045  | 0.064<br>±0.043 | -0.014<br>±0.017 | 0.058<br>±0.078 | 0.036<br>±0.059  | -0.053<br>±0.054 | 0.000<br>±0.000  | 0.008<br>±0.043 | 0.008<br>±0.063  | 0.000<br>±0.000  | -0.011<br>±0.018 | 0.150<br>± 0.054               | -0.003<br>±0.060  | 0.111<br>±0.026                | 0.039<br>±0.041   | <b>0.128</b><br>± <b>0.039</b> | 0.036<br>±0.021   |
|               | AUC      | 0.616<br>±0.042                | 0.616<br>±0.041                | <b>0.619</b><br>± <b>0.025</b> | 0.597<br>±0.047  | 0.534<br>±0.044 | 0.456<br>±0.014  | 0.546<br>±0.011 | 0.514<br>±0.040  | 0.407<br>±0.036  | 0.486<br>±0.040  | 0.508<br>±0.026 | 0.502<br>±0.027  | 0.498<br>±0.004  | 0.460<br>±0.020  | 0.634<br>± 0.037               | 0.520<br>±0.052   | 0.609<br>±0.013                | 0.530<br>±0.047   | 0.609<br>±0.044                | 0.523<br>±0.027   |
|               | BAcc     | 0.221<br>±0.040                | 0.231<br>±0.047                | 0.248<br>±0.047                | 0.210<br>±0.038  | 0.198<br>±0.037 | 0.131<br>±0.015  | 0.193<br>±0.067 | 0.174<br>±0.051  | 0.098<br>±0.046  | 0.143<br>±0.000  | 0.150<br>±0.037 | 0.150<br>±0.054  | 0.143<br>±0.000  | 0.133<br>±0.016  | 0.271<br>± 0.046               | 0.140<br>±0.051   | 0.238<br>±0.022                | 0.176<br>±0.035   | <b>0.252</b><br>± <b>0.033</b> | 0.174<br>±0.018   |
|               | Acc_1    | 0.221<br>±0.040                | 0.231<br>±0.047                | 0.248<br>±0.047                | 0.210<br>±0.038  | 0.198<br>±0.037 | 0.131<br>±0.015  | 0.193<br>±0.067 | 0.174<br>±0.051  | 0.098<br>±0.046  | 0.143<br>±0.000  | 0.149<br>±0.046 | 0.150<br>±0.058  | 0.143<br>±0.000  | 0.133<br>±0.016  | 0.271<br>± 0.046               | 0.143<br>±0.053   | 0.238<br>±0.024                | 0.178<br>±0.036   | <b>0.255</b><br>± <b>0.042</b> | 0.173<br>±0.016   |
| sub7          | Acc_2    | <b>0.424</b><br>± <b>0.050</b> | 0.388<br>±0.074                | 0.431<br>± 0.046               | 0.400<br>±0.072  | 0.324<br>±0.044 | 0.252<br>±0.023  | 0.343<br>±0.049 | 0.305<br>±0.056  | 0.224<br>±0.071  | 0.281<br>±0.011  | 0.320<br>±0.034 | 0.290<br>±0.053  | 0.286<br>±0.000  | 0.279<br>±0.036  | 0.419<br>±0.055                | 0.317<br>±0.077   | 0.398<br>±0.047                | 0.337<br>±0.072   | 0.414<br>±0.055                | 0.307<br>±0.029   |
|               | $\kappa$ | <b>0.089</b><br>± <b>0.021</b> | 0.050<br>±0.040                | 0.047<br>±0.035                | 0.092<br>± 0.046 | 0.014<br>±0.026 | 0.025<br>±0.076  | 0.011<br>±0.035 | -0.022<br>±0.021 | -0.036<br>±0.030 | -0.061<br>±0.025 | 0.011<br>±0.057 | -0.006<br>±0.035 | -0.003<br>±0.059 | -0.033<br>±0.027 | 0.022<br>±0.049                | 0.008<br>±0.040   | 0.017<br>±0.021                | 0.022<br>±0.050   | 0.047<br>±0.049                | 0.025<br>±0.067   |
|               | AUC      | <b>0.603</b><br>± <b>0.004</b> | 0.548<br>±0.020                | 0.553<br>±0.009                | 0.605<br>± 0.027 | 0.510<br>±0.014 | 0.500<br>±0.040  | 0.531<br>±0.035 | 0.502<br>±0.047  | 0.477<br>±0.021  | 0.420<br>±0.035  | 0.533<br>±0.059 | 0.518<br>±0.027  | 0.497<br>±0.030  | 0.434<br>±0.017  | 0.533<br>±0.030                | 0.506<br>±0.040   | 0.529<br>±0.042                | 0.504<br>±0.033   | 0.541<br>±0.043                | 0.527<br>±0.030   |
|               | BAcc     | <b>0.219</b><br>± <b>0.018</b> | 0.186<br>±0.034                | 0.183<br>±0.030                | 0.221<br>± 0.039 | 0.155<br>±0.022 | 0.164<br>±0.065  | 0.152<br>±0.030 | 0.124<br>±0.018  | 0.112<br>±0.026  | 0.090<br>±0.022  | 0.152<br>±0.049 | 0.138<br>±0.030  | 0.140<br>±0.051  | 0.114<br>±0.023  | 0.162<br>±0.042                | 0.150<br>±0.034   | 0.157<br>±0.018                | 0.162<br>±0.043   | 0.183<br>±0.042                | 0.164<br>±0.057   |
|               |          |                                |                                |                                |                  |                 |                  |                 |                  |                  |                  |                 |                  |                  |                  |                                |                   |                                |                   |                                |                   |
|               |          |                                |                                |                                |                  |                 |                  |                 |                  |                  |                  |                 |                  |                  |                  |                                |                   |                                |                   |                                |                   |

Continued on next page

| Subject | Metric   | DeepConvnet                 | EEGNet                      | Conformer                 | CTNet                       | BIOT (f)             | BIOT (l)              | BENDR (f)                   | BENDR (l)             | CBraMod (f)           | CBraMod (l)           | EEGPT (f)            | EEGPT (l)            | LaBraM (f)            | LaBraM (l)            | STEEGformer-s (f)    | STEEGformer-s (l)     | STEEGformer-b (f)    | STEEGformer-b (l)     | STEEGformer-l (f)           | STEEGformer-l (l)     |
|---------|----------|-----------------------------|-----------------------------|---------------------------|-----------------------------|----------------------|-----------------------|-----------------------------|-----------------------|-----------------------|-----------------------|----------------------|----------------------|-----------------------|-----------------------|----------------------|-----------------------|----------------------|-----------------------|-----------------------------|-----------------------|
| sub8    | Acc.1    | <b>0.219</b><br>$\pm 0.018$ | 0.186<br>$\pm 0.034$        | 0.183<br>$\pm 0.030$      | $\frac{0.221}{\pm 0.039}$   | 0.155<br>$\pm 0.022$ | 0.164<br>$\pm 0.065$  | 0.152<br>$\pm 0.030$        | 0.124<br>$\pm 0.018$  | 0.112<br>$\pm 0.026$  | 0.088<br>$\pm 0.022$  | 0.157<br>$\pm 0.056$ | 0.137<br>$\pm 0.033$ | 0.140<br>$\pm 0.051$  | 0.114<br>$\pm 0.023$  | 0.162<br>$\pm 0.042$ | 0.150<br>$\pm 0.034$  | 0.156<br>$\pm 0.012$ | 0.163<br>$\pm 0.038$  | 0.186<br>$\pm 0.040$        | 0.166<br>$\pm 0.059$  |
|         | Acc.2    | <b>0.381</b><br>$\pm 0.027$ | 0.333<br>$\pm 0.035$        | 0.329<br>$\pm 0.034$      | $\frac{0.400}{\pm 0.038}$   | 0.307<br>$\pm 0.039$ | 0.269<br>$\pm 0.085$  | 0.300<br>$\pm 0.036$        | 0.271<br>$\pm 0.040$  | 0.238<br>$\pm 0.039$  | 0.202<br>$\pm 0.034$  | 0.310<br>$\pm 0.081$ | 0.297<br>$\pm 0.034$ | 0.298<br>$\pm 0.045$  | 0.219<br>$\pm 0.042$  | 0.317<br>$\pm 0.045$ | 0.307<br>$\pm 0.077$  | 0.312<br>$\pm 0.024$ | 0.273<br>$\pm 0.079$  | 0.319<br>$\pm 0.058$        | 0.316<br>$\pm 0.066$  |
|         | $\kappa$ | 0.114<br>$\pm 0.033$        | 0.125<br>$\pm 0.051$        | $\frac{0.186}{\pm 0.040}$ | <b>0.172</b><br>$\pm 0.047$ | 0.075<br>$\pm 0.029$ | -0.011<br>$\pm 0.012$ | 0.067<br>$\pm 0.075$        | -0.003<br>$\pm 0.030$ | -0.017<br>$\pm 0.039$ | -0.003<br>$\pm 0.006$ | 0.031<br>$\pm 0.079$ | 0.067<br>$\pm 0.037$ | -0.019<br>$\pm 0.027$ | -0.008<br>$\pm 0.027$ | 0.117<br>$\pm 0.063$ | 0.028<br>$\pm 0.038$  | 0.144<br>$\pm 0.040$ | 0.075<br>$\pm 0.067$  | 0.167<br>$\pm 0.048$        | 0.094<br>$\pm 0.055$  |
|         | AUC      | 0.647<br>$\pm 0.024$        | <b>0.662</b><br>$\pm 0.025$ | $\frac{0.671}{\pm 0.031}$ | 0.661<br>$\pm 0.024$        | 0.578<br>$\pm 0.053$ | 0.523<br>$\pm 0.042$  | 0.579<br>$\pm 0.015$        | 0.495<br>$\pm 0.029$  | 0.438<br>$\pm 0.032$  | 0.455<br>$\pm 0.026$  | 0.557<br>$\pm 0.041$ | 0.548<br>$\pm 0.030$ | 0.475<br>$\pm 0.020$  | 0.467<br>$\pm 0.021$  | 0.597<br>$\pm 0.050$ | 0.532<br>$\pm 0.039$  | 0.616<br>$\pm 0.025$ | 0.553<br>$\pm 0.049$  | 0.643<br>$\pm 0.036$        | 0.573<br>$\pm 0.053$  |
|         | BAcc     | 0.240<br>$\pm 0.028$        | 0.250<br>$\pm 0.044$        | $\frac{0.302}{\pm 0.034}$ | <b>0.290</b><br>$\pm 0.040$ | 0.207<br>$\pm 0.025$ | 0.133<br>$\pm 0.010$  | 0.200<br>$\pm 0.064$        | 0.140<br>$\pm 0.026$  | 0.129<br>$\pm 0.033$  | 0.140<br>$\pm 0.005$  | 0.169<br>$\pm 0.068$ | 0.200<br>$\pm 0.032$ | 0.126<br>$\pm 0.023$  | 0.136<br>$\pm 0.023$  | 0.243<br>$\pm 0.054$ | 0.167<br>$\pm 0.033$  | 0.267<br>$\pm 0.034$ | 0.207<br>$\pm 0.057$  | 0.286<br>$\pm 0.041$        | 0.224<br>$\pm 0.047$  |
|         | Acc.1    | 0.240<br>$\pm 0.028$        | 0.250<br>$\pm 0.044$        | $\frac{0.302}{\pm 0.034}$ | 0.290<br>$\pm 0.040$        | 0.207<br>$\pm 0.025$ | 0.133<br>$\pm 0.010$  | 0.200<br>$\pm 0.064$        | 0.140<br>$\pm 0.026$  | 0.129<br>$\pm 0.033$  | 0.140<br>$\pm 0.005$  | 0.174<br>$\pm 0.078$ | 0.207<br>$\pm 0.045$ | 0.126<br>$\pm 0.023$  | 0.138<br>$\pm 0.025$  | 0.243<br>$\pm 0.054$ | 0.167<br>$\pm 0.033$  | 0.265<br>$\pm 0.041$ | 0.209<br>$\pm 0.059$  | <b>0.294</b><br>$\pm 0.047$ | 0.226<br>$\pm 0.052$  |
| sub9    | Acc.2    | 0.440<br>$\pm 0.048$        | <b>0.464</b><br>$\pm 0.054$ | 0.452<br>$\pm 0.055$      | <b>0.464</b><br>$\pm 0.045$ | 0.393<br>$\pm 0.067$ | 0.279<br>$\pm 0.020$  | 0.367<br>$\pm 0.024$        | 0.276<br>$\pm 0.034$  | 0.248<br>$\pm 0.054$  | 0.264<br>$\pm 0.028$  | 0.347<br>$\pm 0.073$ | 0.361<br>$\pm 0.083$ | 0.267<br>$\pm 0.031$  | 0.293<br>$\pm 0.014$  | 0.398<br>$\pm 0.052$ | 0.314<br>$\pm 0.066$  | 0.411<br>$\pm 0.069$ | 0.345<br>$\pm 0.072$  | $\frac{0.481}{\pm 0.070}$   | 0.395<br>$\pm 0.078$  |
|         | $\kappa$ | <b>0.075</b><br>$\pm 0.033$ | 0.061<br>$\pm 0.052$        | $\frac{0.081}{\pm 0.030}$ | $\frac{0.081}{\pm 0.045}$   | 0.008<br>$\pm 0.057$ | -0.033<br>$\pm 0.040$ | <b>0.075</b><br>$\pm 0.042$ | 0.044<br>$\pm 0.065$  | -0.064<br>$\pm 0.064$ | -0.058<br>$\pm 0.018$ | 0.039<br>$\pm 0.049$ | 0.000<br>$\pm 0.033$ | -0.047<br>$\pm 0.061$ | -0.044<br>$\pm 0.049$ | 0.033<br>$\pm 0.032$ | -0.028<br>$\pm 0.028$ | 0.017<br>$\pm 0.033$ | -0.036<br>$\pm 0.045$ | 0.036<br>$\pm 0.046$        | -0.019<br>$\pm 0.036$ |
|         | AUC      | $\frac{0.582}{\pm 0.019}$   | 0.569<br>$\pm 0.046$        | 0.572<br>$\pm 0.024$      | <b>0.579</b><br>$\pm 0.037$ | 0.512<br>$\pm 0.067$ | 0.480<br>$\pm 0.043$  | 0.539<br>$\pm 0.038$        | 0.514<br>$\pm 0.037$  | 0.455<br>$\pm 0.022$  | 0.433<br>$\pm 0.031$  | 0.492<br>$\pm 0.032$ | 0.499<br>$\pm 0.050$ | 0.446<br>$\pm 0.048$  | 0.435<br>$\pm 0.040$  | 0.533<br>$\pm 0.028$ | 0.462<br>$\pm 0.024$  | 0.534<br>$\pm 0.042$ | 0.453<br>$\pm 0.026$  | 0.544<br>$\pm 0.044$        | 0.461<br>$\pm 0.041$  |
|         | BAcc     | <b>0.207</b><br>$\pm 0.029$ | 0.195<br>$\pm 0.044$        | $\frac{0.212}{\pm 0.026}$ | $\frac{0.212}{\pm 0.039}$   | 0.150<br>$\pm 0.049$ | 0.114<br>$\pm 0.034$  | <b>0.207</b><br>$\pm 0.036$ | 0.181<br>$\pm 0.055$  | 0.088<br>$\pm 0.055$  | 0.093<br>$\pm 0.016$  | 0.176<br>$\pm 0.042$ | 0.143<br>$\pm 0.028$ | 0.102<br>$\pm 0.052$  | 0.105<br>$\pm 0.042$  | 0.171<br>$\pm 0.027$ | 0.119<br>$\pm 0.024$  | 0.157<br>$\pm 0.028$ | 0.112<br>$\pm 0.038$  | 0.174<br>$\pm 0.039$        | 0.126<br>$\pm 0.031$  |
|         | Acc.1    | 0.207<br>$\pm 0.029$        | 0.195<br>$\pm 0.044$        | $\frac{0.212}{\pm 0.026}$ | <b>0.212</b><br>$\pm 0.039$ | 0.150<br>$\pm 0.049$ | 0.114<br>$\pm 0.034$  | 0.207<br>$\pm 0.036$        | 0.181<br>$\pm 0.055$  | 0.088<br>$\pm 0.055$  | 0.090<br>$\pm 0.014$  | 0.175<br>$\pm 0.039$ | 0.144<br>$\pm 0.039$ | 0.102<br>$\pm 0.052$  | 0.105<br>$\pm 0.042$  | 0.171<br>$\pm 0.027$ | 0.119<br>$\pm 0.024$  | 0.149<br>$\pm 0.035$ | 0.113<br>$\pm 0.039$  | 0.168<br>$\pm 0.034$        | 0.126<br>$\pm 0.032$  |
|         | Acc.2    | $\frac{0.383}{\pm 0.020}$   | <b>0.364</b><br>$\pm 0.060$ | 0.362<br>$\pm 0.034$      | 0.348<br>$\pm 0.090$        | 0.302<br>$\pm 0.071$ | 0.262<br>$\pm 0.059$  | 0.343<br>$\pm 0.049$        | 0.314<br>$\pm 0.032$  | 0.210<br>$\pm 0.040$  | 0.200<br>$\pm 0.026$  | 0.298<br>$\pm 0.037$ | 0.280<br>$\pm 0.070$ | 0.229<br>$\pm 0.060$  | 0.226<br>$\pm 0.040$  | 0.307<br>$\pm 0.028$ | 0.245<br>$\pm 0.036$  | 0.333<br>$\pm 0.072$ | 0.233<br>$\pm 0.040$  | 0.329<br>$\pm 0.072$        | 0.258<br>$\pm 0.038$  |

## D.2.2 PER-SUBJECT ZERO-SHOT TRANSFER

Table 31: Average Zero-Shot Transfer Performance Across All Subjects

| Model (Training strategy) | $\kappa$                    | AUC                         | BAcc                        | Acc.1                       | Acc.2                       |
|---------------------------|-----------------------------|-----------------------------|-----------------------------|-----------------------------|-----------------------------|
| <b>DeepConvnet</b>        | 0.020<br>$\pm 0.009$        | 0.526<br>$\pm 0.010$        | 0.160<br>$\pm 0.008$        | 0.160<br>$\pm 0.008$        | 0.312<br>$\pm 0.014$        |
| <b>EEGNet</b>             | <b>0.022</b><br>$\pm 0.008$ | 0.525<br>$\pm 0.008$        | <b>0.162</b><br>$\pm 0.007$ | <b>0.162</b><br>$\pm 0.007$ | 0.314<br>$\pm 0.010$        |
| <b>Conformer</b>          | 0.024<br>$\pm 0.008$        | 0.525<br>$\pm 0.008$        | 0.163<br>$\pm 0.007$        | 0.163<br>$\pm 0.007$        | <b>0.313</b><br>$\pm 0.008$ |
| <b>CTNet</b>              | 0.022<br>$\pm 0.008$        | <b>0.526</b><br>$\pm 0.008$ | 0.162<br>$\pm 0.007$        | 0.162<br>$\pm 0.007$        | 0.313<br>$\pm 0.010$        |
| <b>BIOT (f)</b>           | 0.003<br>$\pm 0.005$        | 0.500<br>$\pm 0.005$        | 0.145<br>$\pm 0.004$        | 0.145<br>$\pm 0.004$        | 0.287<br>$\pm 0.007$        |
| <b>BIOT (l)</b>           | -0.002<br>$\pm 0.004$       | 0.501<br>$\pm 0.004$        | 0.141<br>$\pm 0.003$        | 0.141<br>$\pm 0.003$        | 0.285<br>$\pm 0.003$        |
| <b>BENDR (f)</b>          | 0.010<br>$\pm 0.007$        | 0.512<br>$\pm 0.005$        | 0.151<br>$\pm 0.006$        | 0.151<br>$\pm 0.006$        | 0.298<br>$\pm 0.006$        |
| <b>BENDR (l)</b>          | 0.004<br>$\pm 0.004$        | 0.504<br>$\pm 0.004$        | 0.147<br>$\pm 0.003$        | 0.147<br>$\pm 0.003$        | 0.291<br>$\pm 0.006$        |
| <b>CBraMod (f)</b>        | 0.001<br>$\pm 0.004$        | 0.501<br>$\pm 0.006$        | 0.144<br>$\pm 0.003$        | 0.144<br>$\pm 0.003$        | 0.287<br>$\pm 0.005$        |
| <b>CBraMod (l)</b>        | -0.000<br>$\pm 0.003$       | 0.499<br>$\pm 0.006$        | 0.143<br>$\pm 0.002$        | 0.143<br>$\pm 0.002$        | 0.285<br>$\pm 0.004$        |
| <b>EEGPT (f)</b>          | 0.001<br>$\pm 0.005$        | 0.502<br>$\pm 0.005$        | 0.144<br>$\pm 0.004$        | 0.143<br>$\pm 0.004$        | 0.287<br>$\pm 0.007$        |
| <b>EEGPT (l)</b>          | 0.002<br>$\pm 0.005$        | 0.505<br>$\pm 0.004$        | 0.145<br>$\pm 0.004$        | 0.145<br>$\pm 0.004$        | 0.289<br>$\pm 0.004$        |
| <b>LaBraM (f)</b>         | -0.001<br>$\pm 0.002$       | 0.497<br>$\pm 0.005$        | 0.142<br>$\pm 0.002$        | 0.142<br>$\pm 0.002$        | 0.285<br>$\pm 0.004$        |
| <b>LaBraM (l)</b>         | 0.000<br>$\pm 0.003$        | 0.503<br>$\pm 0.004$        | 0.143<br>$\pm 0.002$        | 0.143<br>$\pm 0.002$        | 0.287<br>$\pm 0.002$        |
| <b>STEEGformer-s (f)</b>  | 0.015<br>$\pm 0.010$        | 0.516<br>$\pm 0.011$        | 0.156<br>$\pm 0.009$        | 0.156<br>$\pm 0.009$        | 0.304<br>$\pm 0.013$        |
| <b>STEEGformer-s (l)</b>  | 0.004<br>$\pm 0.004$        | 0.507<br>$\pm 0.005$        | 0.146<br>$\pm 0.004$        | 0.146<br>$\pm 0.004$        | 0.291<br>$\pm 0.007$        |
| <b>STEEGformer-b (f)</b>  | 0.015<br>$\pm 0.009$        | 0.516<br>$\pm 0.008$        | 0.156<br>$\pm 0.008$        | 0.156<br>$\pm 0.007$        | 0.302<br>$\pm 0.009$        |
| <b>STEEGformer-b (l)</b>  | 0.005<br>$\pm 0.007$        | 0.509<br>$\pm 0.006$        | 0.147<br>$\pm 0.006$        | 0.148<br>$\pm 0.006$        | 0.293<br>$\pm 0.005$        |
| <b>STEEGformer-l (f)</b>  | 0.018<br>$\pm 0.009$        | 0.521<br>$\pm 0.009$        | 0.158<br>$\pm 0.007$        | 0.158<br>$\pm 0.008$        | 0.308<br>$\pm 0.011$        |
| <b>STEEGformer-l (l)</b>  | 0.004<br>$\pm 0.006$        | 0.512<br>$\pm 0.007$        | 0.147<br>$\pm 0.005$        | 0.147<br>$\pm 0.005$        | 0.292<br>$\pm 0.007$        |

Table 32: Per-Subject Zero-Shot Transfer Performance

| Subject | Metric           | DeepConvnet                 | EEGNet                      | Conformer                   | CTNet                       | BIOT (f)              | BIOT (l)              | BENDR (f)            | BENDR (l)             | CBraMod (f)           | CBraMod (l)           | EEGPT (f)             | EEGPT (l)             | LaBraM (f)            | LaBraM (l)            | STEEGformer-s (f)           | STEEGformer-s (l)     | STEEGformer-b (f)    | STEEGformer-b (l)     | STEEGformer-l (f)    | STEEGformer-l (l)     |
|---------|------------------|-----------------------------|-----------------------------|-----------------------------|-----------------------------|-----------------------|-----------------------|----------------------|-----------------------|-----------------------|-----------------------|-----------------------|-----------------------|-----------------------|-----------------------|-----------------------------|-----------------------|----------------------|-----------------------|----------------------|-----------------------|
| sub1    | $\kappa$         | 0.013<br>$\pm 0.017$        | 0.019<br>$\pm 0.028$        | 0.019<br>$\pm 0.021$        | <b>0.019</b><br>$\pm 0.021$ | -0.002<br>$\pm 0.015$ | -0.008<br>$\pm 0.015$ | 0.007<br>$\pm 0.015$ | 0.007<br>$\pm 0.027$  | 0.005<br>$\pm 0.017$  | 0.002<br>$\pm 0.010$  | -0.002<br>$\pm 0.016$ | 0.004<br>$\pm 0.015$  | 0.002<br>$\pm 0.020$  | 0.008<br>$\pm 0.013$  | 0.022<br>$\pm 0.024$        | 0.007<br>$\pm 0.017$  | 0.007<br>$\pm 0.011$ | 0.001<br>$\pm 0.018$  | 0.018<br>$\pm 0.024$ | 0.005<br>$\pm 0.016$  |
|         | AUC              | 0.522<br>$\pm 0.022$        | 0.524<br>$\pm 0.024$        | <b>0.524</b><br>$\pm 0.018$ | 0.530<br>$\pm 0.020$        | 0.500<br>$\pm 0.014$  | 0.502<br>$\pm 0.018$  | 0.507<br>$\pm 0.018$ | 0.506<br>$\pm 0.019$  | 0.502<br>$\pm 0.015$  | 0.497<br>$\pm 0.020$  | 0.506<br>$\pm 0.016$  | 0.502<br>$\pm 0.019$  | 0.500<br>$\pm 0.017$  | 0.502<br>$\pm 0.018$  | 0.524<br>$\pm 0.017$        | 0.514<br>$\pm 0.018$  | 0.521<br>$\pm 0.012$ | 0.520<br>$\pm 0.018$  | 0.523<br>$\pm 0.019$ | 0.523<br>$\pm 0.016$  |
|         | BAcc             | 0.154<br>$\pm 0.015$        | 0.159<br>$\pm 0.024$        | 0.159<br>$\pm 0.018$        | <b>0.160</b><br>$\pm 0.018$ | 0.141<br>$\pm 0.013$  | 0.136<br>$\pm 0.013$  | 0.149<br>$\pm 0.013$ | 0.148<br>$\pm 0.023$  | 0.147<br>$\pm 0.014$  | 0.144<br>$\pm 0.009$  | 0.141<br>$\pm 0.014$  | 0.146<br>$\pm 0.013$  | 0.145<br>$\pm 0.017$  | 0.149<br>$\pm 0.011$  | 0.162<br>$\pm 0.021$        | 0.149<br>$\pm 0.015$  | 0.149<br>$\pm 0.010$ | 0.143<br>$\pm 0.015$  | 0.159<br>$\pm 0.021$ | 0.147<br>$\pm 0.014$  |
|         | Acc <sub>1</sub> | 0.154<br>$\pm 0.015$        | 0.159<br>$\pm 0.025$        | 0.159<br>$\pm 0.018$        | <b>0.160</b><br>$\pm 0.018$ | 0.141<br>$\pm 0.013$  | 0.136<br>$\pm 0.013$  | 0.149<br>$\pm 0.013$ | 0.148<br>$\pm 0.023$  | 0.148<br>$\pm 0.014$  | 0.144<br>$\pm 0.009$  | 0.141<br>$\pm 0.014$  | 0.147<br>$\pm 0.013$  | 0.145<br>$\pm 0.017$  | 0.149<br>$\pm 0.011$  | 0.162<br>$\pm 0.021$        | 0.149<br>$\pm 0.015$  | 0.148<br>$\pm 0.011$ | 0.143<br>$\pm 0.016$  | 0.159<br>$\pm 0.022$ | 0.150<br>$\pm 0.015$  |
|         | Acc <sub>2</sub> | 0.299<br>$\pm 0.020$        | 0.312<br>$\pm 0.026$        | 0.310<br>$\pm 0.018$        | 0.320<br>$\pm 0.026$        | 0.283<br>$\pm 0.015$  | 0.280<br>$\pm 0.011$  | 0.296<br>$\pm 0.026$ | 0.293<br>$\pm 0.027$  | 0.288<br>$\pm 0.013$  | 0.284<br>$\pm 0.007$  | 0.289<br>$\pm 0.018$  | 0.292<br>$\pm 0.024$  | 0.280<br>$\pm 0.016$  | 0.285<br>$\pm 0.016$  | <b>0.313</b><br>$\pm 0.029$ | 0.296<br>$\pm 0.018$  | 0.298<br>$\pm 0.020$ | 0.297<br>$\pm 0.022$  | 0.307<br>$\pm 0.029$ | 0.290<br>$\pm 0.016$  |
| sub10   | $\kappa$         | 0.012<br>$\pm 0.023$        | <b>0.019</b><br>$\pm 0.021$ | 0.017<br>$\pm 0.021$        | 0.017<br>$\pm 0.026$        | 0.015<br>$\pm 0.013$  | -0.003<br>$\pm 0.012$ | 0.013<br>$\pm 0.019$ | 0.003<br>$\pm 0.017$  | -0.003<br>$\pm 0.015$ | 0.001<br>$\pm 0.010$  | -0.004<br>$\pm 0.012$ | 0.001<br>$\pm 0.022$  | -0.006<br>$\pm 0.014$ | -0.003<br>$\pm 0.017$ | 0.001<br>$\pm 0.020$        | -0.002<br>$\pm 0.019$ | 0.021<br>$\pm 0.019$ | 0.010<br>$\pm 0.022$  | 0.006<br>$\pm 0.022$ | 0.007<br>$\pm 0.023$  |
|         | AUC              | <b>0.520</b><br>$\pm 0.022$ | 0.521<br>$\pm 0.024$        | 0.516<br>$\pm 0.022$        | 0.517<br>$\pm 0.026$        | 0.512<br>$\pm 0.011$  | 0.497<br>$\pm 0.010$  | 0.510<br>$\pm 0.014$ | 0.500<br>$\pm 0.017$  | 0.501<br>$\pm 0.011$  | 0.493<br>$\pm 0.024$  | 0.502<br>$\pm 0.019$  | 0.509<br>$\pm 0.009$  | 0.490<br>$\pm 0.010$  | 0.501<br>$\pm 0.011$  | 0.500<br>$\pm 0.019$        | 0.508<br>$\pm 0.022$  | 0.513<br>$\pm 0.025$ | 0.509<br>$\pm 0.027$  | 0.511<br>$\pm 0.016$ | 0.513<br>$\pm 0.021$  |
|         | BAcc             | 0.153<br>$\pm 0.020$        | <b>0.159</b><br>$\pm 0.018$ | 0.157<br>$\pm 0.018$        | 0.157<br>$\pm 0.022$        | 0.156<br>$\pm 0.011$  | 0.140<br>$\pm 0.010$  | 0.154<br>$\pm 0.016$ | 0.146<br>$\pm 0.014$  | 0.141<br>$\pm 0.013$  | 0.143<br>$\pm 0.009$  | 0.140<br>$\pm 0.010$  | 0.144<br>$\pm 0.019$  | 0.138<br>$\pm 0.012$  | 0.140<br>$\pm 0.015$  | 0.144<br>$\pm 0.017$        | 0.141<br>$\pm 0.016$  | 0.161<br>$\pm 0.017$ | 0.152<br>$\pm 0.019$  | 0.148<br>$\pm 0.019$ | 0.149<br>$\pm 0.020$  |
|         | Acc <sub>1</sub> | 0.153<br>$\pm 0.020$        | <b>0.159</b><br>$\pm 0.018$ | 0.157<br>$\pm 0.018$        | 0.157<br>$\pm 0.022$        | 0.156<br>$\pm 0.011$  | 0.140<br>$\pm 0.010$  | 0.154<br>$\pm 0.016$ | 0.146<br>$\pm 0.015$  | 0.141<br>$\pm 0.012$  | 0.143<br>$\pm 0.009$  | 0.137<br>$\pm 0.010$  | 0.144<br>$\pm 0.021$  | 0.138<br>$\pm 0.012$  | 0.140<br>$\pm 0.015$  | 0.144<br>$\pm 0.017$        | 0.141<br>$\pm 0.016$  | 0.159<br>$\pm 0.017$ | 0.151<br>$\pm 0.019$  | 0.148<br>$\pm 0.020$ | 0.148<br>$\pm 0.019$  |
|         | Acc <sub>2</sub> | 0.310<br>$\pm 0.030$        | <b>0.310</b><br>$\pm 0.029$ | 0.308<br>$\pm 0.021$        | 0.308<br>$\pm 0.032$        | 0.303<br>$\pm 0.017$  | 0.280<br>$\pm 0.011$  | 0.299<br>$\pm 0.026$ | 0.282<br>$\pm 0.021$  | 0.284<br>$\pm 0.008$  | 0.279<br>$\pm 0.017$  | 0.281<br>$\pm 0.022$  | 0.286<br>$\pm 0.027$  | 0.275<br>$\pm 0.014$  | 0.287<br>$\pm 0.013$  | 0.289<br>$\pm 0.022$        | 0.285<br>$\pm 0.022$  | 0.303<br>$\pm 0.031$ | 0.293<br>$\pm 0.022$  | 0.299<br>$\pm 0.022$ | 0.303<br>$\pm 0.021$  |
| sub11   | $\kappa$         | <b>0.021</b><br>$\pm 0.023$ | 0.017<br>$\pm 0.017$        | 0.018<br>$\pm 0.023$        | 0.015<br>$\pm 0.026$        | 0.004<br>$\pm 0.014$  | 0.004<br>$\pm 0.009$  | 0.004<br>$\pm 0.018$ | -0.002<br>$\pm 0.015$ | 0.002<br>$\pm 0.014$  | -0.004<br>$\pm 0.009$ | 0.005<br>$\pm 0.022$  | -0.001<br>$\pm 0.019$ | 0.001<br>$\pm 0.015$  | -0.003<br>$\pm 0.015$ | 0.020<br>$\pm 0.022$        | 0.003<br>$\pm 0.013$  | 0.022<br>$\pm 0.025$ | -0.006<br>$\pm 0.016$ | 0.004<br>$\pm 0.019$ | -0.006<br>$\pm 0.013$ |
|         | AUC              | 0.525<br>$\pm 0.021$        | 0.518<br>$\pm 0.020$        | <b>0.523</b><br>$\pm 0.017$ | 0.522<br>$\pm 0.023$        | 0.496<br>$\pm 0.014$  | 0.501<br>$\pm 0.015$  | 0.509<br>$\pm 0.015$ | 0.496<br>$\pm 0.012$  | 0.499<br>$\pm 0.008$  | 0.497<br>$\pm 0.020$  | 0.503<br>$\pm 0.018$  | 0.505<br>$\pm 0.012$  | 0.508<br>$\pm 0.015$  | 0.499<br>$\pm 0.008$  | 0.520<br>$\pm 0.016$        | 0.502<br>$\pm 0.026$  | 0.521<br>$\pm 0.021$ | 0.500<br>$\pm 0.021$  | 0.508<br>$\pm 0.017$ | 0.498<br>$\pm 0.022$  |
|         | BAcc             | <b>0.161</b><br>$\pm 0.020$ | 0.157<br>$\pm 0.014$        | 0.159<br>$\pm 0.020$        | 0.156<br>$\pm 0.022$        | 0.146<br>$\pm 0.012$  | 0.146<br>$\pm 0.008$  | 0.146<br>$\pm 0.015$ | 0.146<br>$\pm 0.013$  | 0.141<br>$\pm 0.012$  | 0.145<br>$\pm 0.008$  | 0.139<br>$\pm 0.019$  | 0.147<br>$\pm 0.016$  | 0.142<br>$\pm 0.013$  | 0.144<br>$\pm 0.013$  | 0.160<br>$\pm 0.019$        | 0.146<br>$\pm 0.011$  | 0.162<br>$\pm 0.022$ | 0.138<br>$\pm 0.013$  | 0.146<br>$\pm 0.016$ | 0.138<br>$\pm 0.011$  |
|         | Acc <sub>1</sub> | 0.161<br>$\pm 0.020$        | 0.157<br>$\pm 0.014$        | 0.159<br>$\pm 0.020$        | 0.156<br>$\pm 0.022$        | 0.146<br>$\pm 0.012$  | 0.146<br>$\pm 0.008$  | 0.146<br>$\pm 0.015$ | 0.141<br>$\pm 0.013$  | 0.145<br>$\pm 0.012$  | 0.139<br>$\pm 0.007$  | 0.147<br>$\pm 0.018$  | 0.140<br>$\pm 0.017$  | 0.143<br>$\pm 0.013$  | 0.141<br>$\pm 0.013$  | <b>0.160</b><br>$\pm 0.019$ | 0.146<br>$\pm 0.011$  | 0.160<br>$\pm 0.022$ | 0.137<br>$\pm 0.014$  | 0.146<br>$\pm 0.018$ | 0.137<br>$\pm 0.013$  |
|         | Acc <sub>2</sub> | <b>0.316</b><br>$\pm 0.029$ | 0.305<br>$\pm 0.025$        | 0.316<br>$\pm 0.019$        | 0.304<br>$\pm 0.023$        | 0.289<br>$\pm 0.014$  | 0.289<br>$\pm 0.011$  | 0.292<br>$\pm 0.022$ | 0.280<br>$\pm 0.013$  | 0.286<br>$\pm 0.015$  | 0.281<br>$\pm 0.010$  | 0.291<br>$\pm 0.022$  | 0.286<br>$\pm 0.018$  | 0.290<br>$\pm 0.017$  | 0.286<br>$\pm 0.014$  | 0.308<br>$\pm 0.022$        | 0.290<br>$\pm 0.019$  | 0.304<br>$\pm 0.024$ | 0.284<br>$\pm 0.016$  | 0.288<br>$\pm 0.024$ | 0.288<br>$\pm 0.015$  |

Continued on next page

| SubjectMetric |          | DeepConvnet                 | EEGNet                      | Conformer                   | CTNet                | BIOT (f)             | BIOT (l)              | BENDR (f)            | BENDR (l)            | CBraMod (f)           | CBraMod (l)           | EEGPT (f)             | EEGPT (l)             | LaBraM (f)            | LaBraM (l)            | STEEGformer-s (f)           | STEEGformer-s (l)     | STEEGformer-b (f)     | STEEGformer-b (l)     | STEEGformer-l (f)    | STEEGformer-l (l)     |
|---------------|----------|-----------------------------|-----------------------------|-----------------------------|----------------------|----------------------|-----------------------|----------------------|----------------------|-----------------------|-----------------------|-----------------------|-----------------------|-----------------------|-----------------------|-----------------------------|-----------------------|-----------------------|-----------------------|----------------------|-----------------------|
| sub12         | $\kappa$ | <b>0.028</b><br>$\pm 0.021$ | 0.019<br>$\pm 0.015$        | 0.020<br>$\pm 0.012$        | 0.022<br>$\pm 0.025$ | 0.002<br>$\pm 0.011$ | -0.000<br>$\pm 0.016$ | 0.016<br>$\pm 0.024$ | 0.005<br>$\pm 0.014$ | 0.001<br>$\pm 0.018$  | 0.003<br>$\pm 0.009$  | 0.007<br>$\pm 0.017$  | 0.012<br>$\pm 0.012$  | -0.002<br>$\pm 0.013$ | 0.001<br>$\pm 0.014$  | 0.020<br>$\pm 0.025$        | 0.013<br>$\pm 0.014$  | 0.024<br>$\pm 0.019$  | 0.010<br>$\pm 0.015$  | 0.034<br>$\pm 0.020$ | 0.014<br>$\pm 0.015$  |
|               | AUC      | 0.529<br>$\pm 0.022$        | 0.524<br>$\pm 0.016$        | <b>0.529</b><br>$\pm 0.013$ | 0.526<br>$\pm 0.026$ | 0.500<br>$\pm 0.015$ | 0.501<br>$\pm 0.022$  | 0.513<br>$\pm 0.019$ | 0.507<br>$\pm 0.010$ | 0.501<br>$\pm 0.012$  | 0.502<br>$\pm 0.012$  | 0.509<br>$\pm 0.011$  | 0.508<br>$\pm 0.014$  | 0.500<br>$\pm 0.019$  | 0.507<br>$\pm 0.017$  | 0.522<br>$\pm 0.024$        | 0.517<br>$\pm 0.016$  | 0.523<br>$\pm 0.019$  | 0.517<br>$\pm 0.012$  | 0.537<br>$\pm 0.019$ | 0.525<br>$\pm 0.020$  |
|               | BAcc     | <b>0.167</b><br>$\pm 0.018$ | 0.159<br>$\pm 0.013$        | 0.160<br>$\pm 0.011$        | 0.162<br>$\pm 0.021$ | 0.144<br>$\pm 0.009$ | 0.143<br>$\pm 0.014$  | 0.157<br>$\pm 0.021$ | 0.147<br>$\pm 0.012$ | 0.144<br>$\pm 0.015$  | 0.145<br>$\pm 0.008$  | 0.149<br>$\pm 0.015$  | 0.153<br>$\pm 0.010$  | 0.141<br>$\pm 0.011$  | 0.143<br>$\pm 0.012$  | 0.160<br>$\pm 0.022$        | 0.154<br>$\pm 0.012$  | 0.164<br>$\pm 0.016$  | 0.152<br>$\pm 0.013$  | 0.172<br>$\pm 0.017$ | 0.155<br>$\pm 0.013$  |
|               | Acc_1    | <b>0.167</b><br>$\pm 0.018$ | 0.159<br>$\pm 0.013$        | 0.160<br>$\pm 0.011$        | 0.162<br>$\pm 0.021$ | 0.144<br>$\pm 0.009$ | 0.143<br>$\pm 0.014$  | 0.157<br>$\pm 0.020$ | 0.147<br>$\pm 0.012$ | 0.144<br>$\pm 0.015$  | 0.145<br>$\pm 0.008$  | 0.150<br>$\pm 0.016$  | 0.152<br>$\pm 0.009$  | 0.141<br>$\pm 0.011$  | 0.143<br>$\pm 0.012$  | 0.161<br>$\pm 0.022$        | 0.153<br>$\pm 0.012$  | 0.164<br>$\pm 0.016$  | 0.151<br>$\pm 0.013$  | 0.172<br>$\pm 0.018$ | 0.156<br>$\pm 0.015$  |
|               | Acc_2    | 0.313<br>$\pm 0.023$        | 0.310<br>$\pm 0.022$        | <b>0.319</b><br>$\pm 0.017$ | 0.316<br>$\pm 0.026$ | 0.288<br>$\pm 0.023$ | 0.286<br>$\pm 0.015$  | 0.298<br>$\pm 0.025$ | 0.294<br>$\pm 0.021$ | 0.290<br>$\pm 0.016$  | 0.289<br>$\pm 0.006$  | 0.303<br>$\pm 0.024$  | 0.297<br>$\pm 0.019$  | 0.287<br>$\pm 0.019$  | 0.288<br>$\pm 0.012$  | 0.311<br>$\pm 0.024$        | 0.296<br>$\pm 0.012$  | 0.306<br>$\pm 0.026$  | 0.297<br>$\pm 0.022$  | 0.321<br>$\pm 0.018$ | 0.305<br>$\pm 0.018$  |
| sub13         | $\kappa$ | <b>0.020</b><br>$\pm 0.024$ | 0.012<br>$\pm 0.022$        | 0.022<br>$\pm 0.029$        | 0.013<br>$\pm 0.019$ | 0.004<br>$\pm 0.014$ | -0.005<br>$\pm 0.012$ | 0.006<br>$\pm 0.024$ | 0.010<br>$\pm 0.021$ | -0.000<br>$\pm 0.015$ | 0.002<br>$\pm 0.013$  | -0.009<br>$\pm 0.014$ | -0.001<br>$\pm 0.018$ | -0.001<br>$\pm 0.009$ | -0.003<br>$\pm 0.014$ | 0.006<br>$\pm 0.014$        | -0.000<br>$\pm 0.010$ | -0.003<br>$\pm 0.018$ | -0.000<br>$\pm 0.017$ | 0.015<br>$\pm 0.018$ | -0.008<br>$\pm 0.013$ |
|               | AUC      | 0.525<br>$\pm 0.015$        | 0.517<br>$\pm 0.017$        | <b>0.523</b><br>$\pm 0.015$ | 0.520<br>$\pm 0.015$ | 0.495<br>$\pm 0.012$ | 0.507<br>$\pm 0.015$  | 0.508<br>$\pm 0.017$ | 0.504<br>$\pm 0.016$ | 0.499<br>$\pm 0.012$  | 0.496<br>$\pm 0.014$  | 0.491<br>$\pm 0.012$  | 0.505<br>$\pm 0.022$  | 0.492<br>$\pm 0.013$  | 0.498<br>$\pm 0.009$  | 0.500<br>$\pm 0.017$        | 0.496<br>$\pm 0.021$  | 0.498<br>$\pm 0.012$  | 0.505<br>$\pm 0.018$  | 0.509<br>$\pm 0.013$ | 0.502<br>$\pm 0.020$  |
|               | BAcc     | <b>0.160</b><br>$\pm 0.020$ | 0.153<br>$\pm 0.019$        | 0.162<br>$\pm 0.024$        | 0.154<br>$\pm 0.016$ | 0.146<br>$\pm 0.012$ | 0.138<br>$\pm 0.011$  | 0.148<br>$\pm 0.021$ | 0.143<br>$\pm 0.018$ | 0.145<br>$\pm 0.013$  | 0.143<br>$\pm 0.011$  | 0.135<br>$\pm 0.012$  | 0.142<br>$\pm 0.015$  | 0.142<br>$\pm 0.008$  | 0.141<br>$\pm 0.012$  | 0.148<br>$\pm 0.012$        | 0.143<br>$\pm 0.008$  | 0.140<br>$\pm 0.016$  | 0.143<br>$\pm 0.014$  | 0.155<br>$\pm 0.015$ | 0.136<br>$\pm 0.011$  |
|               | Acc_1    | <b>0.160</b><br>$\pm 0.020$ | 0.153<br>$\pm 0.019$        | 0.162<br>$\pm 0.024$        | 0.154<br>$\pm 0.016$ | 0.146<br>$\pm 0.012$ | 0.138<br>$\pm 0.011$  | 0.148<br>$\pm 0.021$ | 0.152<br>$\pm 0.018$ | 0.143<br>$\pm 0.013$  | 0.145<br>$\pm 0.012$  | 0.134<br>$\pm 0.015$  | 0.142<br>$\pm 0.015$  | 0.142<br>$\pm 0.009$  | 0.140<br>$\pm 0.012$  | 0.148<br>$\pm 0.012$        | 0.143<br>$\pm 0.008$  | 0.142<br>$\pm 0.016$  | 0.145<br>$\pm 0.015$  | 0.155<br>$\pm 0.015$ | 0.136<br>$\pm 0.012$  |
|               | Acc_2    | 0.305<br>$\pm 0.021$        | <b>0.306</b><br>$\pm 0.017$ | 0.311<br>$\pm 0.023$        | 0.304<br>$\pm 0.023$ | 0.287<br>$\pm 0.013$ | 0.288<br>$\pm 0.011$  | 0.295<br>$\pm 0.029$ | 0.289<br>$\pm 0.024$ | 0.287<br>$\pm 0.017$  | 0.288<br>$\pm 0.015$  | 0.276<br>$\pm 0.016$  | 0.288<br>$\pm 0.023$  | 0.288<br>$\pm 0.009$  | 0.284<br>$\pm 0.012$  | 0.285<br>$\pm 0.018$        | 0.285<br>$\pm 0.016$  | 0.287<br>$\pm 0.019$  | 0.292<br>$\pm 0.017$  | 0.299<br>$\pm 0.022$ | 0.283<br>$\pm 0.018$  |
| sub14         | $\kappa$ | 0.014<br>$\pm 0.015$        | 0.029<br>$\pm 0.017$        | <b>0.023</b><br>$\pm 0.023$ | 0.018<br>$\pm 0.020$ | 0.002<br>$\pm 0.016$ | -0.005<br>$\pm 0.014$ | 0.016<br>$\pm 0.022$ | 0.009<br>$\pm 0.014$ | 0.003<br>$\pm 0.019$  | -0.001<br>$\pm 0.008$ | 0.001<br>$\pm 0.020$  | 0.000<br>$\pm 0.018$  | 0.002<br>$\pm 0.009$  | -0.000<br>$\pm 0.011$ | -0.002<br>$\pm 0.021$       | 0.001<br>$\pm 0.014$  | 0.003<br>$\pm 0.019$  | 0.001<br>$\pm 0.027$  | 0.017<br>$\pm 0.024$ | 0.005<br>$\pm 0.017$  |
|               | AUC      | 0.521<br>$\pm 0.017$        | 0.528<br>$\pm 0.016$        | <b>0.526</b><br>$\pm 0.019$ | 0.517<br>$\pm 0.018$ | 0.502<br>$\pm 0.019$ | 0.497<br>$\pm 0.010$  | 0.511<br>$\pm 0.015$ | 0.510<br>$\pm 0.012$ | 0.498<br>$\pm 0.013$  | 0.492<br>$\pm 0.021$  | 0.502<br>$\pm 0.016$  | 0.501<br>$\pm 0.018$  | 0.497<br>$\pm 0.024$  | 0.499<br>$\pm 0.015$  | 0.497<br>$\pm 0.016$        | 0.503<br>$\pm 0.019$  | 0.507<br>$\pm 0.012$  | 0.499<br>$\pm 0.025$  | 0.517<br>$\pm 0.018$ | 0.507<br>$\pm 0.018$  |
|               | BAcc     | 0.155<br>$\pm 0.013$        | 0.167<br>$\pm 0.014$        | <b>0.162</b><br>$\pm 0.020$ | 0.158<br>$\pm 0.017$ | 0.145<br>$\pm 0.014$ | 0.139<br>$\pm 0.012$  | 0.157<br>$\pm 0.019$ | 0.151<br>$\pm 0.012$ | 0.145<br>$\pm 0.017$  | 0.142<br>$\pm 0.007$  | 0.144<br>$\pm 0.017$  | 0.143<br>$\pm 0.015$  | 0.145<br>$\pm 0.008$  | 0.143<br>$\pm 0.010$  | 0.141<br>$\pm 0.018$        | 0.144<br>$\pm 0.012$  | 0.146<br>$\pm 0.017$  | 0.144<br>$\pm 0.023$  | 0.157<br>$\pm 0.021$ | 0.147<br>$\pm 0.014$  |
|               | Acc_1    | 0.155<br>$\pm 0.013$        | 0.167<br>$\pm 0.014$        | <b>0.162</b><br>$\pm 0.020$ | 0.158<br>$\pm 0.017$ | 0.145<br>$\pm 0.014$ | 0.139<br>$\pm 0.012$  | 0.157<br>$\pm 0.019$ | 0.151<br>$\pm 0.012$ | 0.146<br>$\pm 0.016$  | 0.142<br>$\pm 0.006$  | 0.142<br>$\pm 0.018$  | 0.144<br>$\pm 0.016$  | 0.145<br>$\pm 0.007$  | 0.143<br>$\pm 0.010$  | 0.141<br>$\pm 0.018$        | 0.144<br>$\pm 0.012$  | 0.147<br>$\pm 0.017$  | 0.143<br>$\pm 0.025$  | 0.156<br>$\pm 0.021$ | 0.145<br>$\pm 0.016$  |
|               | Acc_2    | 0.303<br>$\pm 0.027$        | 0.322<br>$\pm 0.028$        | <b>0.315</b><br>$\pm 0.028$ | 0.302<br>$\pm 0.021$ | 0.288<br>$\pm 0.022$ | 0.285<br>$\pm 0.014$  | 0.303<br>$\pm 0.025$ | 0.303<br>$\pm 0.012$ | 0.290<br>$\pm 0.019$  | 0.289<br>$\pm 0.006$  | 0.283<br>$\pm 0.025$  | 0.289<br>$\pm 0.021$  | 0.286<br>$\pm 0.010$  | 0.285<br>$\pm 0.012$  | 0.281<br>$\pm 0.018$        | 0.286<br>$\pm 0.017$  | 0.287<br>$\pm 0.024$  | 0.288<br>$\pm 0.022$  | 0.294<br>$\pm 0.023$ | 0.286<br>$\pm 0.016$  |
| sub15         | $\kappa$ | 0.031<br>$\pm 0.019$        | 0.031<br>$\pm 0.025$        | 0.029<br>$\pm 0.019$        | 0.041<br>$\pm 0.024$ | 0.012<br>$\pm 0.017$ | 0.005<br>$\pm 0.022$  | 0.027<br>$\pm 0.023$ | 0.006<br>$\pm 0.014$ | 0.003<br>$\pm 0.017$  | 0.001<br>$\pm 0.008$  | 0.003<br>$\pm 0.017$  | 0.001<br>$\pm 0.019$  | -0.001<br>$\pm 0.012$ | 0.001<br>$\pm 0.009$  | <b>0.033</b><br>$\pm 0.027$ | 0.006<br>$\pm 0.013$  | 0.013<br>$\pm 0.029$  | 0.013<br>$\pm 0.022$  | 0.017<br>$\pm 0.022$ | 0.007<br>$\pm 0.020$  |

Continued on next page



| Subject | Metric   | DeepConvnet                 | EEGNet                      | Conformer                   | CTNet                       | BIOT (f)             | BIOT (l)              | BENDR (f)            | BENDR (l)             | CBraMod (f)           | CBraMod (l)           | EEGPT (f)             | EEGPT (l)             | LaBraM (f)            | LaBraM (l)           | STEEGformer-s (f)           | STEEGformer-s (l)     | STEEGformer-b (f)    | STEEGformer-b (l)    | STEEGformer-h (f)    | STEEGformer-h (l)     |
|---------|----------|-----------------------------|-----------------------------|-----------------------------|-----------------------------|----------------------|-----------------------|----------------------|-----------------------|-----------------------|-----------------------|-----------------------|-----------------------|-----------------------|----------------------|-----------------------------|-----------------------|----------------------|----------------------|----------------------|-----------------------|
|         | AUC      | <b>0.539</b><br>$\pm 0.016$ | 0.537<br>$\pm 0.019$        | 0.530<br>$\pm 0.017$        | 0.545<br>$\pm 0.018$        | 0.504<br>$\pm 0.018$ | 0.505<br>$\pm 0.021$  | 0.521<br>$\pm 0.019$ | 0.502<br>$\pm 0.015$  | 0.498<br>$\pm 0.012$  | 0.504<br>$\pm 0.020$  | 0.504<br>$\pm 0.015$  | 0.506<br>$\pm 0.008$  | 0.500<br>$\pm 0.020$  | 0.504<br>$\pm 0.013$ | 0.535<br>$\pm 0.018$        | 0.511<br>$\pm 0.012$  | 0.515<br>$\pm 0.017$ | 0.505<br>$\pm 0.016$ | 0.532<br>$\pm 0.017$ | 0.514<br>$\pm 0.017$  |
|         | BAcc     | 0.169<br>$\pm 0.016$        | 0.169<br>$\pm 0.021$        | 0.168<br>$\pm 0.017$        | 0.178<br>$\pm 0.021$        | 0.153<br>$\pm 0.015$ | 0.147<br>$\pm 0.019$  | 0.166<br>$\pm 0.020$ | 0.148<br>$\pm 0.012$  | 0.146<br>$\pm 0.014$  | 0.143<br>$\pm 0.007$  | 0.145<br>$\pm 0.015$  | 0.144<br>$\pm 0.016$  | 0.142<br>$\pm 0.010$  | 0.143<br>$\pm 0.008$ | <b>0.171</b><br>$\pm 0.024$ | 0.148<br>$\pm 0.011$  | 0.154<br>$\pm 0.025$ | 0.154<br>$\pm 0.019$ | 0.157<br>$\pm 0.019$ | 0.149<br>$\pm 0.017$  |
|         | Acc.1    | 0.169<br>$\pm 0.016$        | 0.169<br>$\pm 0.021$        | 0.168<br>$\pm 0.017$        | 0.178<br>$\pm 0.020$        | 0.153<br>$\pm 0.015$ | 0.147<br>$\pm 0.019$  | 0.166<br>$\pm 0.020$ | 0.148<br>$\pm 0.012$  | 0.145<br>$\pm 0.014$  | 0.143<br>$\pm 0.008$  | 0.146<br>$\pm 0.015$  | 0.144<br>$\pm 0.015$  | 0.141<br>$\pm 0.010$  | 0.143<br>$\pm 0.008$ | <b>0.171</b><br>$\pm 0.024$ | 0.148<br>$\pm 0.010$  | 0.155<br>$\pm 0.025$ | 0.155<br>$\pm 0.019$ | 0.156<br>$\pm 0.021$ | 0.151<br>$\pm 0.018$  |
|         | Acc.2    | 0.325<br>$\pm 0.023$        | 0.321<br>$\pm 0.025$        | 0.315<br>$\pm 0.020$        | <b>0.331</b><br>$\pm 0.019$ | 0.302<br>$\pm 0.020$ | 0.286<br>$\pm 0.021$  | 0.306<br>$\pm 0.025$ | 0.283<br>$\pm 0.021$  | 0.283<br>$\pm 0.017$  | 0.286<br>$\pm 0.008$  | 0.289<br>$\pm 0.018$  | 0.285<br>$\pm 0.016$  | 0.285<br>$\pm 0.006$  | 0.289<br>$\pm 0.008$ | 0.332<br>$\pm 0.026$        | 0.293<br>$\pm 0.017$  | 0.310<br>$\pm 0.019$ | 0.295<br>$\pm 0.022$ | 0.314<br>$\pm 0.024$ | 0.301<br>$\pm 0.018$  |
|         | $\kappa$ | <b>0.032</b><br>$\pm 0.014$ | 0.032<br>$\pm 0.017$        | 0.039<br>$\pm 0.018$        | 0.025<br>$\pm 0.027$        | 0.002<br>$\pm 0.026$ | 0.001<br>$\pm 0.010$  | 0.015<br>$\pm 0.016$ | -0.000<br>$\pm 0.017$ | 0.003<br>$\pm 0.009$  | -0.000<br>$\pm 0.005$ | -0.004<br>$\pm 0.021$ | 0.000<br>$\pm 0.021$  | 0.002<br>$\pm 0.009$  | 0.000<br>$\pm 0.008$ | 0.013<br>$\pm 0.023$        | 0.007<br>$\pm 0.013$  | 0.014<br>$\pm 0.019$ | 0.012<br>$\pm 0.018$ | 0.021<br>$\pm 0.031$ | 0.001<br>$\pm 0.012$  |
| sub2    | AUC      | 0.537<br>$\pm 0.019$        | 0.533<br>$\pm 0.019$        | 0.534<br>$\pm 0.019$        | <b>0.536</b><br>$\pm 0.022$ | 0.498<br>$\pm 0.015$ | 0.507<br>$\pm 0.015$  | 0.519<br>$\pm 0.014$ | 0.500<br>$\pm 0.013$  | 0.502<br>$\pm 0.016$  | 0.508<br>$\pm 0.020$  | 0.501<br>$\pm 0.011$  | 0.503<br>$\pm 0.021$  | 0.495<br>$\pm 0.014$  | 0.501<br>$\pm 0.015$ | 0.517<br>$\pm 0.019$        | 0.505<br>$\pm 0.020$  | 0.517<br>$\pm 0.016$ | 0.504<br>$\pm 0.023$ | 0.520<br>$\pm 0.021$ | 0.512<br>$\pm 0.023$  |
|         | BAcc     | <b>0.170</b><br>$\pm 0.012$ | 0.170<br>$\pm 0.015$        | 0.176<br>$\pm 0.016$        | 0.165<br>$\pm 0.023$        | 0.144<br>$\pm 0.022$ | 0.144<br>$\pm 0.008$  | 0.156<br>$\pm 0.014$ | 0.143<br>$\pm 0.015$  | 0.145<br>$\pm 0.008$  | 0.143<br>$\pm 0.004$  | 0.139<br>$\pm 0.018$  | 0.143<br>$\pm 0.018$  | 0.145<br>$\pm 0.008$  | 0.143<br>$\pm 0.007$ | 0.154<br>$\pm 0.020$        | 0.149<br>$\pm 0.011$  | 0.155<br>$\pm 0.016$ | 0.153<br>$\pm 0.015$ | 0.161<br>$\pm 0.026$ | 0.144<br>$\pm 0.011$  |
|         | Acc.1    | 0.170<br>$\pm 0.012$        | <b>0.170</b><br>$\pm 0.015$ | 0.176<br>$\pm 0.016$        | 0.165<br>$\pm 0.023$        | 0.144<br>$\pm 0.022$ | 0.144<br>$\pm 0.008$  | 0.156<br>$\pm 0.014$ | 0.143<br>$\pm 0.015$  | 0.145<br>$\pm 0.008$  | 0.142<br>$\pm 0.004$  | 0.138<br>$\pm 0.017$  | 0.142<br>$\pm 0.019$  | 0.145<br>$\pm 0.008$  | 0.143<br>$\pm 0.007$ | 0.154<br>$\pm 0.020$        | 0.149<br>$\pm 0.010$  | 0.155<br>$\pm 0.017$ | 0.153<br>$\pm 0.015$ | 0.161<br>$\pm 0.027$ | 0.143<br>$\pm 0.010$  |
|         | Acc.2    | 0.328<br>$\pm 0.019$        | 0.322<br>$\pm 0.022$        | 0.319<br>$\pm 0.022$        | <b>0.326</b><br>$\pm 0.025$ | 0.280<br>$\pm 0.021$ | 0.289<br>$\pm 0.012$  | 0.304<br>$\pm 0.018$ | 0.291<br>$\pm 0.016$  | 0.290<br>$\pm 0.014$  | 0.287<br>$\pm 0.004$  | 0.278<br>$\pm 0.015$  | 0.288<br>$\pm 0.032$  | 0.286<br>$\pm 0.005$  | 0.285<br>$\pm 0.011$ | 0.301<br>$\pm 0.026$        | 0.302<br>$\pm 0.022$  | 0.309<br>$\pm 0.024$ | 0.295<br>$\pm 0.025$ | 0.305<br>$\pm 0.027$ | 0.289<br>$\pm 0.014$  |
|         | $\kappa$ | <b>0.017</b><br>$\pm 0.019$ | 0.014<br>$\pm 0.021$        | 0.010<br>$\pm 0.025$        | 0.024<br>$\pm 0.023$        | 0.004<br>$\pm 0.010$ | 0.003<br>$\pm 0.009$  | 0.008<br>$\pm 0.021$ | 0.002<br>$\pm 0.016$  | -0.005<br>$\pm 0.012$ | -0.005<br>$\pm 0.019$ | 0.009<br>$\pm 0.018$  | -0.003<br>$\pm 0.018$ | -0.002<br>$\pm 0.012$ | 0.003<br>$\pm 0.016$ | 0.004<br>$\pm 0.017$        | -0.004<br>$\pm 0.019$ | 0.009<br>$\pm 0.021$ | 0.004<br>$\pm 0.017$ | 0.010<br>$\pm 0.013$ | -0.001<br>$\pm 0.016$ |
| sub3    | AUC      | 0.516<br>$\pm 0.019$        | <b>0.520</b><br>$\pm 0.016$ | 0.513<br>$\pm 0.017$        | 0.521<br>$\pm 0.015$        | 0.504<br>$\pm 0.011$ | 0.502<br>$\pm 0.017$  | 0.509<br>$\pm 0.016$ | 0.503<br>$\pm 0.011$  | 0.501<br>$\pm 0.014$  | 0.494<br>$\pm 0.022$  | 0.502<br>$\pm 0.013$  | 0.507<br>$\pm 0.015$  | 0.494<br>$\pm 0.013$  | 0.502<br>$\pm 0.015$ | 0.504<br>$\pm 0.014$        | 0.508<br>$\pm 0.021$  | 0.503<br>$\pm 0.018$ | 0.511<br>$\pm 0.022$ | 0.513<br>$\pm 0.016$ | 0.507<br>$\pm 0.020$  |
|         | BAcc     | <b>0.157</b><br>$\pm 0.016$ | 0.155<br>$\pm 0.018$        | 0.152<br>$\pm 0.021$        | 0.163<br>$\pm 0.020$        | 0.146<br>$\pm 0.008$ | 0.145<br>$\pm 0.008$  | 0.149<br>$\pm 0.018$ | 0.145<br>$\pm 0.014$  | 0.139<br>$\pm 0.011$  | 0.139<br>$\pm 0.016$  | 0.151<br>$\pm 0.015$  | 0.141<br>$\pm 0.015$  | 0.141<br>$\pm 0.010$  | 0.146<br>$\pm 0.013$ | 0.147<br>$\pm 0.015$        | 0.139<br>$\pm 0.016$  | 0.151<br>$\pm 0.018$ | 0.146<br>$\pm 0.015$ | 0.151<br>$\pm 0.011$ | 0.142<br>$\pm 0.014$  |
|         | Acc.1    | <b>0.157</b><br>$\pm 0.016$ | 0.154<br>$\pm 0.018$        | 0.151<br>$\pm 0.021$        | 0.163<br>$\pm 0.020$        | 0.146<br>$\pm 0.008$ | 0.145<br>$\pm 0.008$  | 0.149<br>$\pm 0.018$ | 0.145<br>$\pm 0.014$  | 0.139<br>$\pm 0.011$  | 0.139<br>$\pm 0.017$  | 0.149<br>$\pm 0.017$  | 0.140<br>$\pm 0.016$  | 0.141<br>$\pm 0.010$  | 0.146<br>$\pm 0.014$ | 0.147<br>$\pm 0.015$        | 0.139<br>$\pm 0.016$  | 0.149<br>$\pm 0.018$ | 0.146<br>$\pm 0.015$ | 0.150<br>$\pm 0.012$ | 0.141<br>$\pm 0.014$  |
|         | Acc.2    | 0.302<br>$\pm 0.026$        | <b>0.306</b><br>$\pm 0.029$ | 0.295<br>$\pm 0.027$        | 0.313<br>$\pm 0.024$        | 0.283<br>$\pm 0.017$ | 0.284<br>$\pm 0.008$  | 0.294<br>$\pm 0.023$ | 0.287<br>$\pm 0.018$  | 0.286<br>$\pm 0.013$  | 0.279<br>$\pm 0.021$  | 0.285<br>$\pm 0.019$  | 0.289<br>$\pm 0.018$  | 0.280<br>$\pm 0.018$  | 0.286<br>$\pm 0.021$ | 0.293<br>$\pm 0.019$        | 0.288<br>$\pm 0.022$  | 0.288<br>$\pm 0.021$ | 0.292<br>$\pm 0.017$ | 0.300<br>$\pm 0.020$ | 0.287<br>$\pm 0.018$  |
|         | $\kappa$ | 0.028<br>$\pm 0.025$        | 0.031<br>$\pm 0.023$        | <b>0.030</b><br>$\pm 0.027$ | 0.030<br>$\pm 0.017$        | 0.007<br>$\pm 0.019$ | -0.006<br>$\pm 0.016$ | 0.017<br>$\pm 0.015$ | 0.008<br>$\pm 0.023$  | 0.005<br>$\pm 0.019$  | 0.003<br>$\pm 0.006$  | -0.001<br>$\pm 0.018$ | 0.012<br>$\pm 0.017$  | 0.000<br>$\pm 0.005$  | 0.001<br>$\pm 0.010$ | 0.023<br>$\pm 0.029$        | 0.008<br>$\pm 0.014$  | 0.027<br>$\pm 0.014$ | 0.019<br>$\pm 0.020$ | 0.025<br>$\pm 0.023$ | 0.005<br>$\pm 0.014$  |
| sub4    | AUC      | 0.536<br>$\pm 0.023$        | 0.531<br>$\pm 0.021$        | <b>0.534</b><br>$\pm 0.021$ | 0.527<br>$\pm 0.022$        | 0.500<br>$\pm 0.012$ | 0.502<br>$\pm 0.014$  | 0.519<br>$\pm 0.017$ | 0.512<br>$\pm 0.014$  | 0.516<br>$\pm 0.015$  | 0.508<br>$\pm 0.015$  | 0.501<br>$\pm 0.010$  | 0.513<br>$\pm 0.017$  | 0.506<br>$\pm 0.019$  | 0.511<br>$\pm 0.018$ | 0.522<br>$\pm 0.025$        | 0.516<br>$\pm 0.022$  | 0.528<br>$\pm 0.014$ | 0.520<br>$\pm 0.021$ | 0.525<br>$\pm 0.020$ | 0.519<br>$\pm 0.024$  |

Continued on next page

| SubjectMetric |          | DeepConvnet            | EEGNet                 | Conformer              | CTNet           | BIOT (f)         | BIOT (l)         | BENDR (f)        | BENDR (l)        | CBraMod (f)      | CBraMod (l)      | EEGPT (f)        | EEGPT (l)        | LaBraM (f)       | LaBraM (l)      | STEEGformer-s (f) | STEEGformer-s (l) | STEEGformer-b (f)      | STEEGformer-b (l) | STEEGformer-l (f)      | STEEGformer-l (l) |
|---------------|----------|------------------------|------------------------|------------------------|-----------------|------------------|------------------|------------------|------------------|------------------|------------------|------------------|------------------|------------------|-----------------|-------------------|-------------------|------------------------|-------------------|------------------------|-------------------|
| sub5          | BAcc     | 0.167<br>±0.021        | 0.170<br>±0.019        | <b>0.169</b><br>±0.023 | 0.168<br>±0.015 | 0.149<br>±0.017  | 0.137<br>±0.013  | 0.158<br>±0.013  | 0.149<br>±0.020  | 0.147<br>±0.016  | 0.145<br>±0.005  | 0.142<br>±0.016  | 0.153<br>±0.014  | 0.143<br>±0.005  | 0.144<br>±0.009 | 0.163<br>±0.025   | 0.149<br>±0.012   | 0.166<br>±0.012        | 0.159<br>±0.017   | 0.165<br>±0.020        | 0.147<br>±0.012   |
|               | Acc_1    | 0.167<br>±0.021        | 0.170<br>±0.019        | <b>0.169</b><br>±0.023 | 0.169<br>±0.014 | 0.149<br>±0.017  | 0.137<br>±0.013  | 0.158<br>±0.013  | 0.149<br>±0.020  | 0.147<br>±0.016  | 0.145<br>±0.005  | 0.143<br>±0.016  | 0.153<br>±0.014  | 0.144<br>±0.004  | 0.144<br>±0.009 | 0.162<br>±0.024   | 0.149<br>±0.013   | 0.165<br>±0.011        | 0.160<br>±0.017   | 0.164<br>±0.020        | 0.147<br>±0.013   |
|               | Acc_2    | 0.331<br>±0.030        | 0.320<br>±0.027        | <b>0.324</b><br>±0.028 | 0.322<br>±0.023 | 0.286<br>±0.017  | 0.279<br>±0.014  | 0.303<br>±0.018  | 0.301<br>±0.018  | 0.298<br>±0.015  | 0.289<br>±0.006  | 0.293<br>±0.014  | 0.296<br>±0.020  | 0.289<br>±0.012  | 0.289<br>±0.012 | 0.313<br>±0.021   | 0.306<br>±0.018   | 0.319<br>±0.022        | 0.307<br>±0.019   | 0.320<br>±0.026        | 0.298<br>±0.021   |
|               | $\kappa$ | 0.020<br>±0.024        | 0.025<br>±0.015        | 0.028<br>±0.028        | 0.020<br>±0.020 | -0.003<br>±0.019 | -0.001<br>±0.011 | -0.001<br>±0.018 | 0.004<br>±0.018  | 0.003<br>±0.013  | 0.003<br>±0.009  | 0.005<br>±0.012  | -0.001<br>±0.021 | -0.000<br>±0.008 | 0.004<br>±0.009 | 0.018<br>±0.022   | 0.004<br>±0.012   | 0.025<br>±0.017        | 0.008<br>±0.011   | <b>0.026</b><br>±0.016 | 0.011<br>±0.017   |
|               | AUC      | 0.539<br>±0.019        | <b>0.536</b><br>±0.018 | 0.530<br>±0.017        | 0.528<br>±0.012 | 0.496<br>±0.014  | 0.505<br>±0.013  | 0.510<br>±0.017  | 0.506<br>±0.013  | 0.508<br>±0.017  | 0.504<br>±0.026  | 0.504<br>±0.016  | 0.500<br>±0.014  | 0.497<br>±0.010  | 0.507<br>±0.016 | 0.524<br>±0.015   | 0.503<br>±0.013   | 0.525<br>±0.016        | 0.509<br>±0.014   | 0.529<br>±0.015        | 0.512<br>±0.016   |
|               | BAcc     | 0.160<br>±0.021        | 0.164<br>±0.012        | 0.167<br>±0.024        | 0.160<br>±0.017 | 0.141<br>±0.017  | 0.142<br>±0.010  | 0.142<br>±0.015  | 0.147<br>±0.016  | 0.145<br>±0.011  | 0.145<br>±0.007  | 0.147<br>±0.011  | 0.142<br>±0.018  | 0.143<br>±0.007  | 0.146<br>±0.008 | 0.158<br>±0.019   | 0.146<br>±0.011   | 0.164<br>±0.015        | 0.150<br>±0.009   | <b>0.165</b><br>±0.014 | 0.152<br>±0.015   |
| sub6          | Acc_1    | 0.161<br>±0.021        | 0.164<br>±0.013        | 0.167<br>±0.024        | 0.160<br>±0.017 | 0.141<br>±0.017  | 0.142<br>±0.010  | 0.142<br>±0.015  | 0.147<br>±0.015  | 0.145<br>±0.010  | 0.146<br>±0.008  | 0.147<br>±0.013  | 0.142<br>±0.018  | 0.143<br>±0.008  | 0.146<br>±0.008 | 0.158<br>±0.018   | 0.146<br>±0.010   | 0.164<br>±0.014        | 0.153<br>±0.011   | <b>0.166</b><br>±0.015 | 0.152<br>±0.015   |
|               | Acc_2    | <b>0.323</b><br>±0.029 | 0.326<br>±0.024        | 0.320<br>±0.026        | 0.312<br>±0.020 | 0.278<br>±0.016  | 0.288<br>±0.011  | 0.293<br>±0.019  | 0.287<br>±0.020  | 0.293<br>±0.014  | 0.290<br>±0.008  | 0.288<br>±0.020  | 0.286<br>±0.020  | 0.284<br>±0.009  | 0.292<br>±0.011 | 0.309<br>±0.020   | 0.279<br>±0.017   | 0.315<br>±0.022        | 0.294<br>±0.016   | 0.318<br>±0.021        | 0.291<br>±0.016   |
|               | $\kappa$ | 0.031<br>±0.020        | 0.040<br>±0.022        | <b>0.039</b><br>±0.025 | 0.031<br>±0.019 | -0.004<br>±0.020 | -0.007<br>±0.018 | 0.009<br>±0.026  | 0.009<br>±0.021  | -0.000<br>±0.005 | -0.002<br>±0.003 | -0.000<br>±0.019 | 0.004<br>±0.022  | -0.001<br>±0.003 | 0.001<br>±0.010 | 0.032<br>±0.028   | 0.005<br>±0.018   | 0.019<br>±0.022        | 0.004<br>±0.021   | 0.024<br>±0.022        | 0.012<br>±0.020   |
|               | AUC      | 0.537<br>±0.015        | 0.541<br>±0.014        | <b>0.541</b><br>±0.014 | 0.532<br>±0.014 | 0.491<br>±0.016  | 0.490<br>±0.019  | 0.519<br>±0.018  | 0.508<br>±0.017  | 0.497<br>±0.011  | 0.496<br>±0.018  | 0.490<br>±0.014  | 0.503<br>±0.016  | 0.501<br>±0.009  | 0.507<br>±0.011 | 0.532<br>±0.033   | 0.506<br>±0.018   | 0.517<br>±0.018        | 0.506<br>±0.022   | 0.529<br>±0.023        | 0.508<br>±0.020   |
|               | BAcc     | 0.169<br>±0.017        | 0.177<br>±0.019        | <b>0.177</b><br>±0.022 | 0.169<br>±0.016 | 0.140<br>±0.017  | 0.137<br>±0.016  | 0.151<br>±0.023  | 0.150<br>±0.018  | 0.143<br>±0.004  | 0.141<br>±0.003  | 0.143<br>±0.016  | 0.146<br>±0.019  | 0.142<br>±0.002  | 0.144<br>±0.008 | 0.170<br>±0.024   | 0.147<br>±0.016   | 0.159<br>±0.019        | 0.147<br>±0.018   | 0.163<br>±0.019        | 0.153<br>±0.017   |
|               | Acc_1    | 0.169<br>±0.017        | 0.177<br>±0.019        | <b>0.176</b><br>±0.022 | 0.169<br>±0.016 | 0.140<br>±0.017  | 0.137<br>±0.016  | 0.151<br>±0.023  | 0.150<br>±0.018  | 0.143<br>±0.004  | 0.142<br>±0.002  | 0.143<br>±0.016  | 0.146<br>±0.021  | 0.142<br>±0.004  | 0.143<br>±0.008 | 0.170<br>±0.024   | 0.147<br>±0.016   | 0.159<br>±0.020        | 0.146<br>±0.019   | 0.162<br>±0.020        | 0.153<br>±0.017   |
| sub7          | Acc_2    | <b>0.333</b><br>±0.020 | 0.335<br>±0.022        | 0.326<br>±0.021        | 0.324<br>±0.019 | 0.278<br>±0.025  | 0.281<br>±0.020  | 0.307<br>±0.022  | 0.293<br>±0.024  | 0.285<br>±0.005  | 0.284<br>±0.006  | 0.281<br>±0.020  | 0.287<br>±0.016  | 0.285<br>±0.001  | 0.287<br>±0.011 | 0.315<br>±0.037   | 0.285<br>±0.027   | 0.298<br>±0.016        | 0.284<br>±0.023   | 0.321<br>±0.027        | 0.290<br>±0.021   |
|               | $\kappa$ | -0.001<br>±0.020       | 0.016<br>±0.019        | 0.015<br>±0.018        | 0.007<br>±0.021 | 0.003<br>±0.015  | 0.001<br>±0.015  | 0.005<br>±0.018  | -0.001<br>±0.017 | -0.006<br>±0.022 | 0.000<br>±0.009  | -0.000<br>±0.020 | 0.011<br>±0.021  | 0.001<br>±0.009  | 0.001<br>±0.011 | 0.010<br>±0.017   | 0.007<br>±0.019   | <b>0.015</b><br>±0.019 | 0.010<br>±0.016   | 0.009<br>±0.022        | 0.006<br>±0.018   |
|               | AUC      | 0.504<br>±0.019        | 0.515<br>±0.016        | 0.512<br>±0.012        | 0.509<br>±0.019 | 0.503<br>±0.011  | 0.498<br>±0.008  | 0.507<br>±0.017  | 0.498<br>±0.014  | 0.493<br>±0.017  | 0.504<br>±0.019  | 0.503<br>±0.016  | 0.511<br>±0.015  | 0.494<br>±0.011  | 0.505<br>±0.016 | 0.510<br>±0.018   | 0.512<br>±0.017   | <b>0.516</b><br>±0.016 | 0.515<br>±0.016   | 0.511<br>±0.020        | 0.517<br>±0.018   |
|               | BAcc     | 0.142<br>±0.017        | 0.156<br>±0.016        | 0.155<br>±0.015        | 0.149<br>±0.018 | 0.145<br>±0.013  | 0.144<br>±0.013  | 0.147<br>±0.015  | 0.142<br>±0.015  | 0.138<br>±0.018  | 0.143<br>±0.007  | 0.143<br>±0.017  | 0.152<br>±0.018  | 0.144<br>±0.008  | 0.143<br>±0.009 | 0.151<br>±0.015   | 0.149<br>±0.016   | <b>0.156</b><br>±0.017 | 0.152<br>±0.013   | 0.150<br>±0.019        | 0.148<br>±0.015   |

Continued on next page

| SubjectMetric |       | DeepConvnet     | EEGNet          | Conformer       | CTNet           | BIOT (f)         | BIOT (l)         | BENDR (f)        | BENDR (l)       | CBraMod (f)      | CBraMod (l)      | EEGPT (f)        | EEGPT (l)        | LaBraM (f)       | LaBraM (l)       | STEEGformer-s (f) | STEEGformer-s (l) | STEEGformer-b (f) | STEEGformer-b (l) | STEEGformer-l (f) | STEEGformer-l (l) |
|---------------|-------|-----------------|-----------------|-----------------|-----------------|------------------|------------------|------------------|-----------------|------------------|------------------|------------------|------------------|------------------|------------------|-------------------|-------------------|-------------------|-------------------|-------------------|-------------------|
|               | Acc.1 | 0.142<br>±0.017 | 0.156<br>±0.016 | 0.155<br>±0.015 | 0.149<br>±0.018 | 0.145<br>±0.013  | 0.144<br>±0.013  | 0.147<br>±0.015  | 0.142<br>±0.015 | 0.138<br>±0.019  | 0.143<br>±0.006  | 0.141<br>±0.019  | 0.151<br>±0.018  | 0.144<br>±0.007  | 0.144<br>±0.009  | 0.151<br>±0.015   | 0.149<br>±0.016   | 0.156<br>±0.015   | 0.151<br>±0.015   | 0.150<br>±0.021   | 0.146<br>±0.015   |
|               | Acc.2 | 0.282<br>±0.029 | 0.301<br>±0.021 | 0.300<br>±0.020 | 0.296<br>±0.031 | 0.288<br>±0.016  | 0.284<br>±0.013  | 0.294<br>±0.020  | 0.287<br>±0.022 | 0.275<br>±0.020  | 0.285<br>±0.012  | 0.289<br>±0.021  | 0.292<br>±0.026  | 0.289<br>±0.011  | 0.289<br>±0.010  | 0.298<br>±0.028   | 0.286<br>±0.015   | 0.304<br>±0.012   | 0.293<br>±0.019   | 0.298<br>±0.021   | 0.289<br>±0.021   |
|               | κ     | 0.013<br>±0.027 | 0.021<br>±0.028 | 0.029<br>±0.018 | 0.024<br>±0.021 | -0.005<br>±0.008 | 0.001<br>±0.007  | 0.010<br>±0.018  | 0.007<br>±0.021 | 0.010<br>±0.008  | 0.000<br>±0.007  | -0.003<br>±0.016 | -0.002<br>±0.011 | -0.002<br>±0.003 | -0.003<br>±0.009 | 0.020<br>±0.015   | -0.002<br>±0.017  | 0.025<br>±0.028   | 0.000<br>±0.017   | 0.030<br>±0.026   | 0.004<br>±0.024   |
| sub8          | AUC   | 0.519<br>±0.015 | 0.519<br>±0.022 | 0.524<br>±0.020 | 0.528<br>±0.017 | 0.498<br>±0.020  | 0.503<br>±0.021  | 0.513<br>±0.018  | 0.509<br>±0.014 | 0.502<br>±0.019  | 0.506<br>±0.017  | 0.508<br>±0.011  | 0.503<br>±0.015  | 0.494<br>±0.012  | 0.500<br>±0.019  | 0.520<br>±0.015   | 0.503<br>±0.018   | 0.521<br>±0.017   | 0.505<br>±0.015   | 0.533<br>±0.018   | 0.510<br>±0.020   |
|               | BAcc  | 0.154<br>±0.023 | 0.161<br>±0.024 | 0.168<br>±0.015 | 0.164<br>±0.018 | 0.139<br>±0.007  | 0.144<br>±0.006  | 0.152<br>±0.015  | 0.149<br>±0.018 | 0.151<br>±0.007  | 0.143<br>±0.006  | 0.141<br>±0.014  | 0.141<br>±0.009  | 0.141<br>±0.002  | 0.140<br>±0.008  | 0.160<br>±0.013   | 0.141<br>±0.015   | 0.164<br>±0.024   | 0.143<br>±0.015   | 0.169<br>±0.023   | 0.146<br>±0.021   |
|               | Acc.1 | 0.154<br>±0.023 | 0.161<br>±0.024 | 0.168<br>±0.016 | 0.164<br>±0.018 | 0.139<br>±0.007  | 0.144<br>±0.006  | 0.151<br>±0.015  | 0.149<br>±0.018 | 0.152<br>±0.007  | 0.143<br>±0.007  | 0.140<br>±0.014  | 0.141<br>±0.010  | 0.142<br>±0.004  | 0.140<br>±0.008  | 0.160<br>±0.013   | 0.141<br>±0.015   | 0.162<br>±0.022   | 0.142<br>±0.014   | 0.169<br>±0.023   | 0.146<br>±0.021   |
| sub9          | Acc.2 | 0.301<br>±0.025 | 0.313<br>±0.027 | 0.315<br>±0.022 | 0.306<br>±0.018 | 0.289<br>±0.014  | 0.285<br>±0.015  | 0.300<br>±0.023  | 0.299<br>±0.024 | 0.291<br>±0.010  | 0.287<br>±0.008  | 0.286<br>±0.018  | 0.293<br>±0.020  | 0.285<br>±0.005  | 0.285<br>±0.012  | 0.313<br>±0.020   | 0.296<br>±0.013   | 0.308<br>±0.019   | 0.292<br>±0.017   | 0.321<br>±0.021   | 0.300<br>±0.018   |
|               | κ     | 0.026<br>±0.017 | 0.014<br>±0.020 | 0.020<br>±0.022 | 0.027<br>±0.023 | 0.002<br>±0.013  | -0.003<br>±0.007 | -0.002<br>±0.016 | 0.001<br>±0.025 | -0.004<br>±0.017 | -0.006<br>±0.021 | 0.005<br>±0.018  | -0.003<br>±0.024 | -0.002<br>±0.013 | -0.001<br>±0.014 | 0.009<br>±0.016   | 0.001<br>±0.019   | 0.006<br>±0.023   | -0.004<br>±0.021  | 0.012<br>±0.016   | 0.004<br>±0.022   |
|               | AUC   | 0.523<br>±0.015 | 0.517<br>±0.018 | 0.519<br>±0.020 | 0.528<br>±0.016 | 0.497<br>±0.010  | 0.498<br>±0.008  | 0.506<br>±0.017  | 0.503<br>±0.021 | 0.493<br>±0.013  | 0.490<br>±0.026  | 0.498<br>±0.015  | 0.499<br>±0.020  | 0.493<br>±0.018  | 0.500<br>±0.015  | 0.509<br>±0.012   | 0.507<br>±0.019   | 0.514<br>±0.019   | 0.506<br>±0.022   | 0.522<br>±0.017   | 0.510<br>±0.020   |
|               | BAcc  | 0.165<br>±0.014 | 0.155<br>±0.017 | 0.160<br>±0.019 | 0.166<br>±0.019 | 0.144<br>±0.012  | 0.140<br>±0.006  | 0.141<br>±0.014  | 0.144<br>±0.021 | 0.140<br>±0.015  | 0.138<br>±0.018  | 0.147<br>±0.015  | 0.140<br>±0.021  | 0.141<br>±0.011  | 0.142<br>±0.012  | 0.151<br>±0.014   | 0.143<br>±0.016   | 0.148<br>±0.019   | 0.139<br>±0.018   | 0.154<br>±0.014   | 0.146<br>±0.018   |
|               | Acc.1 | 0.165<br>±0.014 | 0.155<br>±0.017 | 0.160<br>±0.019 | 0.166<br>±0.019 | 0.144<br>±0.012  | 0.140<br>±0.006  | 0.141<br>±0.014  | 0.144<br>±0.022 | 0.140<br>±0.015  | 0.138<br>±0.017  | 0.146<br>±0.014  | 0.141<br>±0.020  | 0.141<br>±0.011  | 0.142<br>±0.011  | 0.151<br>±0.014   | 0.143<br>±0.017   | 0.148<br>±0.021   | 0.139<br>±0.019   | 0.152<br>±0.016   | 0.147<br>±0.020   |
|               | Acc.2 | 0.311<br>±0.021 | 0.301<br>±0.025 | 0.306<br>±0.025 | 0.316<br>±0.026 | 0.283<br>±0.017  | 0.289<br>±0.013  | 0.287<br>±0.022  | 0.290<br>±0.019 | 0.280<br>±0.020  | 0.281<br>±0.022  | 0.289<br>±0.024  | 0.282<br>±0.028  | 0.285<br>±0.014  | 0.285<br>±0.017  | 0.299<br>±0.017   | 0.289<br>±0.019   | 0.296<br>±0.019   | 0.290<br>±0.022   | 0.308<br>±0.020   | 0.288<br>±0.020   |

## D.3 LEAVE-ONE-OUT RESULTS

## D.3.1 LEAVE-ONE-OUT ZERO-SHOT EVALUATION

Table 33: Average Leave-One-Out Zero-Shot Performance Across All Subjects.

| Model (Training strategy) | $\kappa$                    | AUC                         | BAcc                        | Acc.1                       | Acc.2                       |
|---------------------------|-----------------------------|-----------------------------|-----------------------------|-----------------------------|-----------------------------|
| <b>DeepConvnet</b>        | <b>0.107</b><br>$\pm 0.043$ | 0.620<br>$\pm 0.029$        | <b>0.234</b><br>$\pm 0.037$ | <b>0.234</b><br>$\pm 0.037$ | <b>0.399</b><br>$\pm 0.040$ |
|                           | 0.086                       | 0.604                       | 0.216                       | 0.216                       | 0.389                       |
| <b>EEGNet</b>             | $\pm 0.030$<br>0.074        | $\pm 0.025$<br>0.590        | $\pm 0.026$<br>0.207        | $\pm 0.026$<br>0.207        | $\pm 0.025$<br>0.378        |
| <b>Conformer</b>          | $\pm 0.024$<br>0.099        | $\pm 0.019$<br>0.615        | $\pm 0.020$<br>0.228        | $\pm 0.020$<br>0.228        | $\pm 0.025$<br>0.392        |
| <b>CTNet</b>              | $\pm 0.038$<br>0.003        | $\pm 0.027$<br>0.505        | $\pm 0.032$<br>0.145        | $\pm 0.032$<br>0.145        | $\pm 0.039$<br>0.289        |
| <b>BIOT (f)</b>           | $\pm 0.025$<br>0.001        | $\pm 0.016$<br>0.504        | $\pm 0.021$<br>0.144        | $\pm 0.021$<br>0.144        | $\pm 0.016$<br>0.288        |
| <b>BIOT (l)</b>           | $\pm 0.020$<br>0.034        | $\pm 0.018$<br>0.551        | $\pm 0.018$<br>0.172        | $\pm 0.017$<br>0.172        | $\pm 0.017$<br>0.334        |
| <b>BENDR (f)</b>          | $\pm 0.025$<br>0.002        | $\pm 0.021$<br>0.502        | $\pm 0.022$<br>0.145        | $\pm 0.022$<br>0.144        | $\pm 0.035$<br>0.288        |
| <b>BENDR (l)</b>          | $\pm 0.021$<br>0.002        | $\pm 0.017$<br>0.504        | $\pm 0.018$<br>0.145        | $\pm 0.017$<br>0.144        | $\pm 0.023$<br>0.286        |
| <b>CBraMod (f)</b>        | $\pm 0.015$<br>0.002        | $\pm 0.016$<br>0.491        | $\pm 0.013$<br>0.145        | $\pm 0.013$<br>0.143        | $\pm 0.020$<br>0.287        |
| <b>CBraMod (l)</b>        | $\pm 0.009$<br>0.018        | $\pm 0.023$<br>0.516        | $\pm 0.008$<br>0.158        | $\pm 0.007$<br>0.159        | $\pm 0.011$<br>0.303        |
| <b>EEGPT (f)</b>          | $\pm 0.016$<br>0.014        | $\pm 0.012$<br>0.517        | $\pm 0.014$<br>0.155        | $\pm 0.014$<br>0.155        | $\pm 0.019$<br>0.306        |
| <b>EEGPT (l)</b>          | $\pm 0.018$<br>-0.000       | $\pm 0.016$<br>0.500        | $\pm 0.016$<br>0.143        | $\pm 0.016$<br>0.140        | $\pm 0.018$<br>0.281        |
| <b>LaBraM (f)</b>         | $\pm 0.006$<br>0.002        | $\pm 0.008$<br>0.506        | $\pm 0.005$<br>0.145        | $\pm 0.006$<br>0.145        | $\pm 0.011$<br>0.289        |
| <b>LaBraM (l)</b>         | $\pm 0.015$<br>0.104        | $\pm 0.020$<br>0.583        | $\pm 0.013$<br>0.232        | $\pm 0.012$<br>0.232        | $\pm 0.014$<br>0.391        |
| <b>STEEGformer-s (f)</b>  | $\pm 0.031$<br>0.023        | $\pm 0.022$<br>0.531        | $\pm 0.027$<br>0.163        | $\pm 0.027$<br>0.163        | $\pm 0.034$<br>0.315        |
| <b>STEEGformer-s (l)</b>  | $\pm 0.021$<br>0.099        | $\pm 0.020$<br>0.588        | $\pm 0.018$<br>0.227        | $\pm 0.018$<br>0.228        | $\pm 0.027$<br>0.391        |
| <b>STEEGformer-b (f)</b>  | $\pm 0.042$<br>0.035        | $\pm 0.032$<br>0.540        | $\pm 0.036$<br>0.173        | $\pm 0.037$<br>0.172        | $\pm 0.037$<br>0.324        |
| <b>STEEGformer-b (l)</b>  | $\pm 0.021$                 | $\pm 0.024$                 | $\pm 0.018$                 | $\pm 0.018$                 | $\pm 0.029$                 |
| <b>STEEGformer-l (f)</b>  | 0.135<br>$\pm 0.043$        | <b>0.618</b><br>$\pm 0.035$ | 0.258<br>$\pm 0.037$        | 0.258<br>$\pm 0.039$        | 0.436<br>$\pm 0.048$        |
|                           | 0.029                       | 0.544                       | 0.168                       | 0.167                       | 0.319                       |
| <b>STEEGformer-l (l)</b>  | $\pm 0.030$                 | $\pm 0.027$                 | $\pm 0.026$                 | $\pm 0.027$                 | $\pm 0.027$                 |

Table 34: Per-Subject Leave-One-Out Zero-Shot Performance.

| Subject | Metric   | DeepConvnet                 | EEGNet               | Conformer            | CTNet                       | BIOT (f)              | BIOT (l)              | BENDR (f)             | BENDR (l)             | CBraMod (f)           | CBraMod (l)           | EEGPT (f)            | EEGPT (l)             | LaBraM (f)            | LaBraM (l)            | STEEGformer-s (f)    | STEEGformer-s (l)    | STEEGformer-b (f)    | STEEGformer-b (l)    | STEEGformer-h (f)           | STEEGformer-h (l)           |
|---------|----------|-----------------------------|----------------------|----------------------|-----------------------------|-----------------------|-----------------------|-----------------------|-----------------------|-----------------------|-----------------------|----------------------|-----------------------|-----------------------|-----------------------|----------------------|----------------------|----------------------|----------------------|-----------------------------|-----------------------------|
| sub1    | $\kappa$ | 0.103<br>$\pm 0.039$        | 0.067<br>$\pm 0.046$ | 0.106<br>$\pm 0.045$ | 0.167<br>$\pm 0.037$        | 0.025<br>$\pm 0.036$  | 0.022<br>$\pm 0.032$  | -0.025<br>$\pm 0.045$ | 0.014<br>$\pm 0.061$  | 0.011<br>$\pm 0.041$  | 0.017<br>$\pm 0.030$  | 0.014<br>$\pm 0.059$ | 0.028<br>$\pm 0.043$  | 0.011<br>$\pm 0.018$  | 0.011<br>$\pm 0.055$  | 0.106<br>$\pm 0.058$ | 0.050<br>$\pm 0.048$ | 0.131<br>$\pm 0.086$ | 0.056<br>$\pm 0.047$ | <b>0.142</b><br>$\pm 0.032$ | 0.108<br>$\pm 0.035$        |
|         | AUC      | 0.607<br>$\pm 0.025$        | 0.577<br>$\pm 0.032$ | 0.588<br>$\pm 0.020$ | 0.634<br>$\pm 0.029$        | 0.494<br>$\pm 0.028$  | 0.529<br>$\pm 0.047$  | 0.500<br>$\pm 0.020$  | 0.500<br>$\pm 0.063$  | 0.509<br>$\pm 0.018$  | 0.485<br>$\pm 0.038$  | 0.497<br>$\pm 0.043$ | 0.522<br>$\pm 0.034$  | 0.515<br>$\pm 0.032$  | 0.507<br>$\pm 0.037$  | 0.566<br>$\pm 0.033$ | 0.561<br>$\pm 0.026$ | 0.587<br>$\pm 0.018$ | 0.586<br>$\pm 0.041$ | 0.610<br>$\pm 0.016$        | <b>0.612</b><br>$\pm 0.037$ |
|         | BAcc     | 0.231<br>$\pm 0.033$        | 0.200<br>$\pm 0.040$ | 0.233<br>$\pm 0.038$ | 0.286<br>$\pm 0.031$        | 0.164<br>$\pm 0.031$  | 0.162<br>$\pm 0.027$  | 0.121<br>$\pm 0.039$  | 0.155<br>$\pm 0.052$  | 0.152<br>$\pm 0.035$  | 0.157<br>$\pm 0.026$  | 0.155<br>$\pm 0.051$ | 0.167<br>$\pm 0.037$  | 0.152<br>$\pm 0.016$  | 0.152<br>$\pm 0.047$  | 0.233<br>$\pm 0.050$ | 0.186<br>$\pm 0.041$ | 0.255<br>$\pm 0.074$ | 0.190<br>$\pm 0.040$ | <b>0.264</b><br>$\pm 0.027$ | 0.236<br>$\pm 0.030$        |
|         | Acc.1    | 0.231<br>$\pm 0.033$        | 0.200<br>$\pm 0.040$ | 0.233<br>$\pm 0.038$ | 0.286<br>$\pm 0.031$        | 0.164<br>$\pm 0.031$  | 0.162<br>$\pm 0.027$  | 0.121<br>$\pm 0.039$  | 0.155<br>$\pm 0.052$  | 0.152<br>$\pm 0.035$  | 0.152<br>$\pm 0.016$  | 0.155<br>$\pm 0.054$ | 0.167<br>$\pm 0.030$  | 0.143<br>$\pm 0.000$  | 0.155<br>$\pm 0.045$  | 0.233<br>$\pm 0.050$ | 0.186<br>$\pm 0.041$ | 0.258<br>$\pm 0.076$ | 0.185<br>$\pm 0.039$ | <b>0.259</b><br>$\pm 0.024$ | 0.236<br>$\pm 0.034$        |
|         | Acc.2    | 0.393<br>$\pm 0.030$        | 0.371<br>$\pm 0.032$ | 0.381<br>$\pm 0.029$ | 0.452<br>$\pm 0.048$        | 0.283<br>$\pm 0.033$  | 0.290<br>$\pm 0.040$  | 0.236<br>$\pm 0.033$  | 0.314<br>$\pm 0.109$  | 0.298<br>$\pm 0.038$  | 0.290<br>$\pm 0.011$  | 0.297<br>$\pm 0.055$ | 0.295<br>$\pm 0.036$  | 0.288<br>$\pm 0.005$  | 0.290<br>$\pm 0.040$  | 0.364<br>$\pm 0.074$ | 0.355<br>$\pm 0.060$ | 0.383<br>$\pm 0.055$ | 0.375<br>$\pm 0.034$ | <b>0.423</b><br>$\pm 0.028$ | 0.378<br>$\pm 0.038$        |
| sub10   | $\kappa$ | 0.044<br>$\pm 0.033$        | 0.094<br>$\pm 0.056$ | 0.081<br>$\pm 0.053$ | 0.114<br>$\pm 0.023$        | -0.008<br>$\pm 0.049$ | -0.014<br>$\pm 0.035$ | 0.019<br>$\pm 0.038$  | -0.014<br>$\pm 0.028$ | -0.014<br>$\pm 0.040$ | -0.006<br>$\pm 0.032$ | 0.003<br>$\pm 0.053$ | -0.003<br>$\pm 0.049$ | -0.006<br>$\pm 0.012$ | -0.011<br>$\pm 0.021$ | 0.078<br>$\pm 0.046$ | 0.011<br>$\pm 0.018$ | 0.050<br>$\pm 0.035$ | 0.036<br>$\pm 0.068$ | <b>0.103</b><br>$\pm 0.067$ | 0.025<br>$\pm 0.060$        |
|         | AUC      | 0.597<br>$\pm 0.032$        | 0.611<br>$\pm 0.042$ | 0.578<br>$\pm 0.042$ | <b>0.604</b><br>$\pm 0.017$ | 0.488<br>$\pm 0.033$  | 0.509<br>$\pm 0.037$  | 0.535<br>$\pm 0.032$  | 0.486<br>$\pm 0.018$  | 0.489<br>$\pm 0.025$  | 0.454<br>$\pm 0.043$  | 0.510<br>$\pm 0.039$ | 0.520<br>$\pm 0.021$  | 0.495<br>$\pm 0.010$  | 0.507<br>$\pm 0.041$  | 0.569<br>$\pm 0.048$ | 0.525<br>$\pm 0.038$ | 0.563<br>$\pm 0.047$ | 0.543<br>$\pm 0.048$ | 0.584<br>$\pm 0.031$        | 0.548<br>$\pm 0.028$        |
|         | BAcc     | 0.181<br>$\pm 0.028$        | 0.224<br>$\pm 0.048$ | 0.212<br>$\pm 0.046$ | 0.240<br>$\pm 0.020$        | 0.136<br>$\pm 0.042$  | 0.131<br>$\pm 0.030$  | 0.160<br>$\pm 0.032$  | 0.131<br>$\pm 0.024$  | 0.131<br>$\pm 0.035$  | 0.138<br>$\pm 0.027$  | 0.145<br>$\pm 0.046$ | 0.140<br>$\pm 0.042$  | 0.138<br>$\pm 0.011$  | 0.133<br>$\pm 0.018$  | 0.210<br>$\pm 0.039$ | 0.152<br>$\pm 0.016$ | 0.186<br>$\pm 0.030$ | 0.174<br>$\pm 0.059$ | <b>0.231</b><br>$\pm 0.057$ | 0.164<br>$\pm 0.051$        |
|         | Acc.1    | 0.181<br>$\pm 0.028$        | 0.224<br>$\pm 0.048$ | 0.212<br>$\pm 0.046$ | 0.238<br>$\pm 0.017$        | 0.136<br>$\pm 0.042$  | 0.131<br>$\pm 0.030$  | 0.160<br>$\pm 0.032$  | 0.131<br>$\pm 0.024$  | 0.129<br>$\pm 0.040$  | 0.140<br>$\pm 0.023$  | 0.150<br>$\pm 0.043$ | 0.143<br>$\pm 0.043$  | 0.138<br>$\pm 0.011$  | 0.133<br>$\pm 0.018$  | 0.210<br>$\pm 0.039$ | 0.152<br>$\pm 0.016$ | 0.181<br>$\pm 0.030$ | 0.172<br>$\pm 0.055$ | <b>0.227</b><br>$\pm 0.054$ | 0.165<br>$\pm 0.052$        |
|         | Acc.2    | 0.369<br>$\pm 0.037$        | 0.402<br>$\pm 0.055$ | 0.369<br>$\pm 0.069$ | <b>0.388</b><br>$\pm 0.054$ | 0.288<br>$\pm 0.031$  | 0.262<br>$\pm 0.056$  | 0.312<br>$\pm 0.039$  | 0.274<br>$\pm 0.035$  | 0.279<br>$\pm 0.044$  | 0.281<br>$\pm 0.041$  | 0.292<br>$\pm 0.041$ | 0.295<br>$\pm 0.043$  | 0.271<br>$\pm 0.032$  | 0.288<br>$\pm 0.043$  | 0.333<br>$\pm 0.079$ | 0.295<br>$\pm 0.023$ | 0.362<br>$\pm 0.075$ | 0.304<br>$\pm 0.070$ | 0.373<br>$\pm 0.049$        | 0.339<br>$\pm 0.054$        |
| sub11   | $\kappa$ | 0.128<br>$\pm 0.048$        | 0.069<br>$\pm 0.035$ | 0.081<br>$\pm 0.039$ | <b>0.133</b><br>$\pm 0.033$ | -0.022<br>$\pm 0.008$ | -0.019<br>$\pm 0.016$ | 0.028<br>$\pm 0.035$  | 0.003<br>$\pm 0.039$  | 0.025<br>$\pm 0.042$  | 0.000<br>$\pm 0.000$  | 0.039<br>$\pm 0.049$ | 0.042<br>$\pm 0.043$  | 0.000<br>$\pm 0.000$  | -0.003<br>$\pm 0.027$ | 0.083<br>$\pm 0.040$ | 0.008<br>$\pm 0.045$ | 0.136<br>$\pm 0.068$ | 0.000<br>$\pm 0.029$ | 0.119<br>$\pm 0.023$        | 0.011<br>$\pm 0.021$        |
|         | AUC      | <b>0.607</b><br>$\pm 0.028$ | 0.577<br>$\pm 0.034$ | 0.584<br>$\pm 0.038$ | 0.615<br>$\pm 0.040$        | 0.493<br>$\pm 0.015$  | 0.463<br>$\pm 0.014$  | 0.557<br>$\pm 0.026$  | 0.508<br>$\pm 0.036$  | 0.507<br>$\pm 0.052$  | 0.503<br>$\pm 0.052$  | 0.533<br>$\pm 0.032$ | 0.538<br>$\pm 0.051$  | 0.479<br>$\pm 0.028$  | 0.518<br>$\pm 0.033$  | 0.574<br>$\pm 0.042$ | 0.515<br>$\pm 0.031$ | 0.590<br>$\pm 0.042$ | 0.514<br>$\pm 0.023$ | 0.600<br>$\pm 0.012$        | 0.514<br>$\pm 0.019$        |
|         | BAcc     | 0.252<br>$\pm 0.041$        | 0.202<br>$\pm 0.030$ | 0.212<br>$\pm 0.033$ | <b>0.257</b><br>$\pm 0.029$ | 0.124<br>$\pm 0.007$  | 0.126<br>$\pm 0.014$  | 0.167<br>$\pm 0.030$  | 0.145<br>$\pm 0.033$  | 0.164<br>$\pm 0.036$  | 0.143<br>$\pm 0.000$  | 0.176<br>$\pm 0.042$ | 0.179<br>$\pm 0.037$  | 0.143<br>$\pm 0.000$  | 0.140<br>$\pm 0.023$  | 0.214<br>$\pm 0.035$ | 0.214<br>$\pm 0.038$ | 0.260<br>$\pm 0.058$ | 0.143<br>$\pm 0.025$ | 0.245<br>$\pm 0.020$        | 0.152<br>$\pm 0.018$        |
|         | Acc.1    | 0.252<br>$\pm 0.041$        | 0.202<br>$\pm 0.030$ | 0.212<br>$\pm 0.033$ | <b>0.257</b><br>$\pm 0.029$ | 0.124<br>$\pm 0.007$  | 0.126<br>$\pm 0.014$  | 0.167<br>$\pm 0.030$  | 0.145<br>$\pm 0.033$  | 0.164<br>$\pm 0.036$  | 0.143<br>$\pm 0.000$  | 0.174<br>$\pm 0.044$ | 0.181<br>$\pm 0.035$  | 0.147<br>$\pm 0.011$  | 0.140<br>$\pm 0.023$  | 0.214<br>$\pm 0.035$ | 0.150<br>$\pm 0.038$ | 0.258<br>$\pm 0.056$ | 0.142<br>$\pm 0.028$ | 0.247<br>$\pm 0.022$        | 0.156<br>$\pm 0.023$        |
|         | Acc.2    | <b>0.412</b><br>$\pm 0.031$ | 0.386<br>$\pm 0.053$ | 0.379<br>$\pm 0.052$ | 0.424<br>$\pm 0.064$        | 0.290<br>$\pm 0.022$  | 0.271<br>$\pm 0.034$  | 0.329<br>$\pm 0.040$  | 0.279<br>$\pm 0.025$  | 0.290<br>$\pm 0.049$  | 0.302<br>$\pm 0.029$  | 0.337<br>$\pm 0.052$ | 0.340<br>$\pm 0.050$  | 0.282<br>$\pm 0.012$  | 0.267<br>$\pm 0.042$  | 0.364<br>$\pm 0.052$ | 0.283<br>$\pm 0.036$ | 0.400<br>$\pm 0.068$ | 0.280<br>$\pm 0.029$ | 0.401<br>$\pm 0.027$        | 0.287<br>$\pm 0.028$        |

Continued on next page

| Subject | Metric   | DeepConvnet                        | EEGNet               | Conformer            | CTNet                              | BIOT (f)              | BIOT (l)              | BENDR (f)            | BENDR (l)             | CBraMod (f)           | CBraMod (l)           | EEGPT (f)            | EEGPT (l)             | LaBraM (f)            | LaBraM (l)            | STEEGformer-s (f)                  | STEEGformer-s (l)    | STEEGformer-b (f)    | STEEGformer-b (l)    | STEEGformer-h (f)                  | STEEGformer-h (l)     |
|---------|----------|------------------------------------|----------------------|----------------------|------------------------------------|-----------------------|-----------------------|----------------------|-----------------------|-----------------------|-----------------------|----------------------|-----------------------|-----------------------|-----------------------|------------------------------------|----------------------|----------------------|----------------------|------------------------------------|-----------------------|
| sub12   | $\kappa$ | 0.119<br>$\pm 0.064$               | 0.050<br>$\pm 0.058$ | 0.089<br>$\pm 0.040$ | 0.069<br>$\pm 0.033$               | 0.047<br>$\pm 0.035$  | -0.017<br>$\pm 0.015$ | 0.064<br>$\pm 0.053$ | -0.022<br>$\pm 0.029$ | -0.006<br>$\pm 0.032$ | 0.003<br>$\pm 0.006$  | 0.025<br>$\pm 0.069$ | 0.050<br>$\pm 0.042$  | 0.000<br>$\pm 0.000$  | 0.008<br>$\pm 0.025$  | <b>0.125</b><br>$\pm$ <b>0.040</b> | 0.047<br>$\pm 0.025$ | 0.111<br>$\pm 0.047$ | 0.081<br>$\pm 0.053$ | 0.169<br>$\pm 0.052$               | 0.075<br>$\pm 0.027$  |
|         | AUC      | <b>0.641</b><br>$\pm$ <b>0.047</b> | 0.591<br>$\pm 0.042$ | 0.606<br>$\pm 0.034$ | 0.606<br>$\pm 0.031$               | 0.534<br>$\pm 0.025$  | 0.506<br>$\pm 0.038$  | 0.575<br>$\pm 0.041$ | 0.502<br>$\pm 0.030$  | 0.485<br>$\pm 0.034$  | 0.489<br>$\pm 0.034$  | 0.506<br>$\pm 0.064$ | 0.530<br>$\pm 0.044$  | 0.499<br>$\pm 0.004$  | 0.474<br>$\pm 0.029$  | 0.599<br>$\pm 0.022$               | 0.567<br>$\pm 0.031$ | 0.598<br>$\pm 0.037$ | 0.569<br>$\pm 0.033$ | 0.660<br>$\pm 0.018$               | 0.571<br>$\pm 0.035$  |
|         | BAcc     | 0.245<br>$\pm 0.055$               | 0.186<br>$\pm 0.050$ | 0.219<br>$\pm 0.034$ | 0.202<br>$\pm 0.028$               | 0.183<br>$\pm 0.030$  | 0.129<br>$\pm 0.013$  | 0.198<br>$\pm 0.046$ | 0.124<br>$\pm 0.025$  | 0.138<br>$\pm 0.027$  | 0.145<br>$\pm 0.005$  | 0.164<br>$\pm 0.059$ | 0.186<br>$\pm 0.036$  | 0.143<br>$\pm 0.000$  | 0.150<br>$\pm 0.022$  | <b>0.250</b><br>$\pm$ <b>0.035</b> | 0.183<br>$\pm 0.022$ | 0.238<br>$\pm 0.040$ | 0.212<br>$\pm 0.046$ | 0.288<br>$\pm 0.045$               | 0.207<br>$\pm 0.023$  |
|         | Acc_1    | 0.245<br>$\pm 0.055$               | 0.186<br>$\pm 0.050$ | 0.219<br>$\pm 0.034$ | 0.202<br>$\pm 0.028$               | 0.183<br>$\pm 0.030$  | 0.129<br>$\pm 0.013$  | 0.198<br>$\pm 0.046$ | 0.124<br>$\pm 0.025$  | 0.135<br>$\pm 0.022$  | 0.150<br>$\pm 0.016$  | 0.171<br>$\pm 0.056$ | 0.184<br>$\pm 0.043$  | 0.146<br>$\pm 0.006$  | 0.150<br>$\pm 0.022$  | <b>0.250</b><br>$\pm$ <b>0.035</b> | 0.186<br>$\pm 0.026$ | 0.233<br>$\pm 0.039$ | 0.209<br>$\pm 0.047$ | 0.286<br>$\pm 0.044$               | 0.209<br>$\pm 0.029$  |
|         | Acc_2    | 0.400<br>$\pm 0.104$               | 0.393<br>$\pm 0.059$ | 0.390<br>$\pm 0.062$ | 0.362<br>$\pm 0.039$               | 0.319<br>$\pm 0.055$  | 0.300<br>$\pm 0.033$  | 0.369<br>$\pm 0.048$ | 0.264<br>$\pm 0.044$  | 0.268<br>$\pm 0.037$  | 0.286<br>$\pm 0.000$  | 0.312<br>$\pm 0.067$ | 0.320<br>$\pm 0.082$  | 0.288<br>$\pm 0.010$  | 0.317<br>$\pm 0.034$  | <b>0.410</b><br>$\pm$ <b>0.039</b> | 0.364<br>$\pm 0.060$ | 0.409<br>$\pm 0.026$ | 0.377<br>$\pm 0.017$ | 0.494<br>$\pm 0.021$               | 0.339<br>$\pm 0.063$  |
| sub13   | $\kappa$ | 0.019<br>$\pm 0.035$               | 0.044<br>$\pm 0.063$ | 0.028<br>$\pm 0.038$ | 0.014<br>$\pm 0.042$               | -0.039<br>$\pm 0.035$ | 0.056<br>$\pm 0.037$  | 0.008<br>$\pm 0.038$ | -0.028<br>$\pm 0.014$ | 0.019<br>$\pm 0.023$  | -0.006<br>$\pm 0.036$ | 0.017<br>$\pm 0.035$ | -0.011<br>$\pm 0.065$ | 0.006<br>$\pm 0.016$  | 0.017<br>$\pm 0.041$  | 0.094<br>$\pm 0.064$               | 0.006<br>$\pm 0.012$ | 0.056<br>$\pm 0.055$ | 0.031<br>$\pm 0.055$ | <b>0.075</b><br>$\pm$ <b>0.066</b> | 0.019<br>$\pm 0.025$  |
|         | AUC      | 0.578<br>$\pm 0.042$               | 0.553<br>$\pm 0.028$ | 0.568<br>$\pm 0.033$ | 0.535<br>$\pm 0.044$               | 0.491<br>$\pm 0.033$  | 0.534<br>$\pm 0.047$  | 0.553<br>$\pm 0.029$ | 0.485<br>$\pm 0.023$  | 0.523<br>$\pm 0.036$  | 0.466<br>$\pm 0.035$  | 0.522<br>$\pm 0.032$ | 0.525<br>$\pm 0.046$  | 0.508<br>$\pm 0.012$  | 0.487<br>$\pm 0.051$  | 0.554<br>$\pm 0.048$               | 0.486<br>$\pm 0.010$ | 0.544<br>$\pm 0.057$ | 0.497<br>$\pm 0.044$ | <b>0.571</b><br>$\pm$ <b>0.027</b> | 0.504<br>$\pm 0.032$  |
|         | BAcc     | 0.160<br>$\pm 0.030$               | 0.181<br>$\pm 0.054$ | 0.167<br>$\pm 0.032$ | 0.155<br>$\pm 0.036$               | 0.110<br>$\pm 0.030$  | 0.190<br>$\pm 0.031$  | 0.150<br>$\pm 0.032$ | 0.119<br>$\pm 0.012$  | 0.160<br>$\pm 0.020$  | 0.138<br>$\pm 0.031$  | 0.157<br>$\pm 0.030$ | 0.133<br>$\pm 0.056$  | 0.148<br>$\pm 0.014$  | 0.157<br>$\pm 0.035$  | 0.224<br>$\pm 0.055$               | 0.148<br>$\pm 0.011$ | 0.190<br>$\pm 0.047$ | 0.169<br>$\pm 0.047$ | <b>0.207</b><br>$\pm$ <b>0.057</b> | 0.160<br>$\pm 0.022$  |
|         | Acc_1    | 0.160<br>$\pm 0.030$               | 0.181<br>$\pm 0.054$ | 0.167<br>$\pm 0.032$ | 0.155<br>$\pm 0.036$               | 0.112<br>$\pm 0.038$  | 0.186<br>$\pm 0.032$  | 0.150<br>$\pm 0.032$ | 0.119<br>$\pm 0.012$  | 0.163<br>$\pm 0.018$  | 0.136<br>$\pm 0.031$  | 0.159<br>$\pm 0.032$ | 0.135<br>$\pm 0.059$  | 0.145<br>$\pm 0.009$  | 0.155<br>$\pm 0.037$  | 0.224<br>$\pm 0.055$               | 0.148<br>$\pm 0.011$ | 0.189<br>$\pm 0.054$ | 0.165<br>$\pm 0.058$ | <b>0.209</b><br>$\pm$ <b>0.054</b> | 0.158<br>$\pm 0.021$  |
|         | Acc_2    | 0.340<br>$\pm 0.036$               | 0.333<br>$\pm 0.045$ | 0.339<br>$\pm 0.048$ | 0.295<br>$\pm 0.039$               | 0.247<br>$\pm 0.063$  | 0.328<br>$\pm 0.050$  | 0.326<br>$\pm 0.046$ | 0.260<br>$\pm 0.016$  | 0.310<br>$\pm 0.029$  | 0.281<br>$\pm 0.029$  | 0.313<br>$\pm 0.030$ | 0.297<br>$\pm 0.062$  | 0.288<br>$\pm 0.013$  | 0.283<br>$\pm 0.057$  | <b>0.362</b><br>$\pm$ <b>0.057</b> | 0.281<br>$\pm 0.025$ | 0.360<br>$\pm 0.089$ | 0.299<br>$\pm 0.057$ | 0.411<br>$\pm 0.048$               | 0.335<br>$\pm 0.030$  |
| sub14   | $\kappa$ | 0.100<br>$\pm 0.051$               | 0.083<br>$\pm 0.051$ | 0.047<br>$\pm 0.052$ | 0.089<br>$\pm 0.067$               | 0.036<br>$\pm 0.032$  | 0.000<br>$\pm 0.014$  | 0.028<br>$\pm 0.069$ | 0.014<br>$\pm 0.049$  | 0.006<br>$\pm 0.032$  | 0.008<br>$\pm 0.012$  | 0.014<br>$\pm 0.022$ | 0.017<br>$\pm 0.025$  | -0.017<br>$\pm 0.018$ | -0.014<br>$\pm 0.026$ | <b>0.114</b><br>$\pm$ <b>0.074</b> | 0.008<br>$\pm 0.036$ | 0.081<br>$\pm 0.053$ | 0.033<br>$\pm 0.043$ | 0.194<br>$\pm 0.042$               | -0.000<br>$\pm 0.051$ |
|         | AUC      | 0.600<br>$\pm 0.056$               | 0.598<br>$\pm 0.024$ | 0.587<br>$\pm 0.042$ | <b>0.609</b><br>$\pm$ <b>0.045</b> | 0.537<br>$\pm 0.034$  | 0.493<br>$\pm 0.028$  | 0.540<br>$\pm 0.049$ | 0.505<br>$\pm 0.035$  | 0.504<br>$\pm 0.041$  | 0.474<br>$\pm 0.021$  | 0.539<br>$\pm 0.025$ | 0.523<br>$\pm 0.040$  | 0.502<br>$\pm 0.012$  | 0.498<br>$\pm 0.040$  | 0.599<br>$\pm 0.043$               | 0.513<br>$\pm 0.041$ | 0.569<br>$\pm 0.040$ | 0.519<br>$\pm 0.033$ | 0.637<br>$\pm 0.027$               | 0.511<br>$\pm 0.048$  |
|         | BAcc     | 0.229<br>$\pm 0.044$               | 0.214<br>$\pm 0.044$ | 0.183<br>$\pm 0.044$ | 0.219<br>$\pm 0.057$               | 0.174<br>$\pm 0.027$  | 0.143<br>$\pm 0.012$  | 0.167<br>$\pm 0.059$ | 0.155<br>$\pm 0.042$  | 0.148<br>$\pm 0.027$  | 0.150<br>$\pm 0.011$  | 0.155<br>$\pm 0.019$ | 0.157<br>$\pm 0.021$  | 0.129<br>$\pm 0.016$  | 0.131<br>$\pm 0.022$  | <b>0.240</b><br>$\pm$ <b>0.064</b> | 0.150<br>$\pm 0.031$ | 0.212<br>$\pm 0.046$ | 0.171<br>$\pm 0.037$ | 0.310<br>$\pm 0.036$               | 0.143<br>$\pm 0.044$  |
|         | Acc_1    | 0.229<br>$\pm 0.044$               | 0.214<br>$\pm 0.044$ | 0.183<br>$\pm 0.044$ | 0.221<br>$\pm 0.056$               | 0.174<br>$\pm 0.027$  | 0.143<br>$\pm 0.012$  | 0.167<br>$\pm 0.059$ | 0.155<br>$\pm 0.042$  | 0.148<br>$\pm 0.027$  | 0.148<br>$\pm 0.007$  | 0.155<br>$\pm 0.019$ | 0.160<br>$\pm 0.023$  | 0.129<br>$\pm 0.021$  | 0.133<br>$\pm 0.021$  | <b>0.240</b><br>$\pm$ <b>0.064</b> | 0.150<br>$\pm 0.031$ | 0.218<br>$\pm 0.053$ | 0.160<br>$\pm 0.033$ | 0.316<br>$\pm 0.029$               | 0.136<br>$\pm 0.047$  |
|         | Acc_2    | 0.390<br>$\pm 0.068$               | 0.369<br>$\pm 0.046$ | 0.395<br>$\pm 0.070$ | 0.402<br>$\pm 0.072$               | 0.310<br>$\pm 0.042$  | 0.302<br>$\pm 0.042$  | 0.331<br>$\pm 0.051$ | 0.293<br>$\pm 0.047$  | 0.276<br>$\pm 0.046$  | 0.271<br>$\pm 0.020$  | 0.332<br>$\pm 0.032$ | 0.313<br>$\pm 0.027$  | 0.245<br>$\pm 0.041$  | 0.290<br>$\pm 0.020$  | <b>0.407</b><br>$\pm$ <b>0.074</b> | 0.290<br>$\pm 0.050$ | 0.374<br>$\pm 0.055$ | 0.282<br>$\pm 0.037$ | 0.486<br>$\pm 0.055$               | 0.270<br>$\pm 0.055$  |
| sub15   | $\kappa$ | <b>0.144</b><br>$\pm$ <b>0.035</b> | 0.092<br>$\pm 0.029$ | 0.078<br>$\pm 0.041$ | 0.133<br>$\pm 0.041$               | -0.017<br>$\pm 0.027$ | 0.008<br>$\pm 0.032$  | 0.042<br>$\pm 0.064$ | 0.019<br>$\pm 0.065$  | -0.006<br>$\pm 0.036$ | 0.025<br>$\pm 0.030$  | 0.056<br>$\pm 0.033$ | -0.000<br>$\pm 0.072$ | 0.008<br>$\pm 0.019$  | 0.022<br>$\pm 0.029$  | 0.125<br>$\pm 0.035$               | 0.028<br>$\pm 0.069$ | 0.133<br>$\pm 0.063$ | 0.042<br>$\pm 0.040$ | 0.183<br>$\pm 0.045$               | 0.025<br>$\pm 0.097$  |

Continued on next page

| Subject | Metric   | DeepConvnet                 | EEGNet               | Conformer                   | CTNet                       | BIOT (f)              | BIOT (l)              | BENDR (f)            | BENDR (l)             | CBraMod (f)           | CBraMod (l)          | EEGPT (f)            | EEGPT (l)             | LaBraM (f)            | LaBraM (l)            | STEEGformer-s (f)    | STEEGformer-s (l)    | STEEGformer-b (f)           | STEEGformer-b (l)    | STEEGformer-h (f)           | STEEGformer-h (l)    |
|---------|----------|-----------------------------|----------------------|-----------------------------|-----------------------------|-----------------------|-----------------------|----------------------|-----------------------|-----------------------|----------------------|----------------------|-----------------------|-----------------------|-----------------------|----------------------|----------------------|-----------------------------|----------------------|-----------------------------|----------------------|
|         | AUC      | <b>0.655</b><br>$\pm 0.037$ | 0.614<br>$\pm 0.017$ | 0.586<br>$\pm 0.032$        | 0.648<br>$\pm 0.020$        | 0.487<br>$\pm 0.042$  | 0.515<br>$\pm 0.039$  | 0.548<br>$\pm 0.030$ | 0.526<br>$\pm 0.054$  | 0.520<br>$\pm 0.034$  | 0.506<br>$\pm 0.053$ | 0.530<br>$\pm 0.024$ | 0.505<br>$\pm 0.045$  | 0.506<br>$\pm 0.014$  | 0.526<br>$\pm 0.013$  | 0.592<br>$\pm 0.031$ | 0.553<br>$\pm 0.042$ | 0.633<br>$\pm 0.050$        | 0.542<br>$\pm 0.045$ | 0.656<br>$\pm 0.027$        | 0.565<br>$\pm 0.041$ |
|         | BAcc     | <b>0.267</b><br>$\pm 0.030$ | 0.221<br>$\pm 0.025$ | 0.210<br>$\pm 0.035$        | 0.257<br>$\pm 0.035$        | 0.129<br>$\pm 0.023$  | 0.150<br>$\pm 0.027$  | 0.179<br>$\pm 0.055$ | 0.160<br>$\pm 0.056$  | 0.164<br>$\pm 0.031$  | 0.164<br>$\pm 0.026$ | 0.190<br>$\pm 0.028$ | 0.143<br>$\pm 0.062$  | 0.150<br>$\pm 0.016$  | 0.162<br>$\pm 0.025$  | 0.250<br>$\pm 0.030$ | 0.167<br>$\pm 0.060$ | 0.257<br>$\pm 0.054$        | 0.179<br>$\pm 0.035$ | 0.300<br>$\pm 0.039$        | 0.164<br>$\pm 0.083$ |
|         | Acc.1    | <b>0.267</b><br>$\pm 0.030$ | 0.219<br>$\pm 0.020$ | 0.210<br>$\pm 0.035$        | 0.257<br>$\pm 0.035$        | 0.129<br>$\pm 0.023$  | 0.150<br>$\pm 0.027$  | 0.179<br>$\pm 0.055$ | 0.157<br>$\pm 0.057$  | 0.138<br>$\pm 0.031$  | 0.155<br>$\pm 0.028$ | 0.192<br>$\pm 0.027$ | 0.142<br>$\pm 0.066$  | 0.143<br>$\pm 0.000$  | 0.162<br>$\pm 0.025$  | 0.250<br>$\pm 0.030$ | 0.167<br>$\pm 0.060$ | 0.264<br>$\pm 0.058$        | 0.176<br>$\pm 0.031$ | 0.312<br>$\pm 0.047$        | 0.158<br>$\pm 0.086$ |
|         | Acc.2    | 0.431<br>$\pm 0.042$        | 0.386<br>$\pm 0.025$ | 0.371<br>$\pm 0.037$        | 0.421<br>$\pm 0.040$        | 0.288<br>$\pm 0.046$  | 0.269<br>$\pm 0.032$  | 0.345<br>$\pm 0.061$ | 0.298<br>$\pm 0.067$  | 0.295<br>$\pm 0.013$  | 0.286<br>$\pm 0.008$ | 0.325<br>$\pm 0.050$ | 0.310<br>$\pm 0.060$  | 0.286<br>$\pm 0.000$  | 0.295<br>$\pm 0.026$  | 0.429<br>$\pm 0.053$ | 0.338<br>$\pm 0.062$ | <b>0.442</b><br>$\pm 0.064$ | 0.317<br>$\pm 0.063$ | 0.496<br>$\pm 0.028$        | 0.345<br>$\pm 0.079$ |
|         | $\kappa$ | <b>0.161</b><br>$\pm 0.038$ | 0.125<br>$\pm 0.073$ | 0.083<br>$\pm 0.026$        | 0.122<br>$\pm 0.048$        | 0.017<br>$\pm 0.067$  | 0.011<br>$\pm 0.027$  | 0.044<br>$\pm 0.039$ | -0.011<br>$\pm 0.036$ | -0.014<br>$\pm 0.024$ | 0.000<br>$\pm 0.000$ | 0.008<br>$\pm 0.048$ | 0.028<br>$\pm 0.053$  | 0.000<br>$\pm 0.000$  | 0.008<br>$\pm 0.019$  | 0.153<br>$\pm 0.058$ | 0.019<br>$\pm 0.027$ | 0.128<br>$\pm 0.036$        | 0.039<br>$\pm 0.040$ | 0.183<br>$\pm 0.028$        | 0.003<br>$\pm 0.015$ |
| sub2    | AUC      | <b>0.659</b><br>$\pm 0.033$ | 0.648<br>$\pm 0.058$ | 0.610<br>$\pm 0.036$        | 0.632<br>$\pm 0.028$        | 0.531<br>$\pm 0.038$  | 0.513<br>$\pm 0.033$  | 0.566<br>$\pm 0.055$ | 0.494<br>$\pm 0.022$  | 0.502<br>$\pm 0.023$  | 0.510<br>$\pm 0.029$ | 0.511<br>$\pm 0.036$ | 0.528<br>$\pm 0.030$  | 0.500<br>$\pm 0.003$  | 0.483<br>$\pm 0.023$  | 0.629<br>$\pm 0.063$ | 0.521<br>$\pm 0.032$ | 0.627<br>$\pm 0.033$        | 0.532<br>$\pm 0.027$ | 0.663<br>$\pm 0.022$        | 0.550<br>$\pm 0.029$ |
|         | BAcc     | <b>0.281</b><br>$\pm 0.032$ | 0.250<br>$\pm 0.063$ | 0.214<br>$\pm 0.022$        | 0.248<br>$\pm 0.041$        | 0.157<br>$\pm 0.057$  | 0.152<br>$\pm 0.023$  | 0.181<br>$\pm 0.033$ | 0.133<br>$\pm 0.031$  | 0.131<br>$\pm 0.021$  | 0.143<br>$\pm 0.000$ | 0.150<br>$\pm 0.041$ | 0.167<br>$\pm 0.045$  | 0.143<br>$\pm 0.000$  | 0.150<br>$\pm 0.016$  | 0.274<br>$\pm 0.050$ | 0.160<br>$\pm 0.023$ | 0.252<br>$\pm 0.031$        | 0.176<br>$\pm 0.034$ | 0.300<br>$\pm 0.024$        | 0.145<br>$\pm 0.013$ |
|         | Acc.1    | <b>0.281</b><br>$\pm 0.032$ | 0.250<br>$\pm 0.063$ | 0.214<br>$\pm 0.022$        | 0.248<br>$\pm 0.041$        | 0.157<br>$\pm 0.057$  | 0.152<br>$\pm 0.023$  | 0.181<br>$\pm 0.033$ | 0.133<br>$\pm 0.031$  | 0.129<br>$\pm 0.021$  | 0.143<br>$\pm 0.000$ | 0.146<br>$\pm 0.042$ | 0.167<br>$\pm 0.045$  | 0.143<br>$\pm 0.000$  | 0.152<br>$\pm 0.021$  | 0.274<br>$\pm 0.050$ | 0.160<br>$\pm 0.023$ | 0.252<br>$\pm 0.031$        | 0.180<br>$\pm 0.035$ | 0.292<br>$\pm 0.027$        | 0.146<br>$\pm 0.012$ |
|         | Acc.2    | <b>0.448</b><br>$\pm 0.068$ | 0.421<br>$\pm 0.073$ | 0.379<br>$\pm 0.057$        | 0.398<br>$\pm 0.048$        | 0.293<br>$\pm 0.079$  | 0.288<br>$\pm 0.018$  | 0.362<br>$\pm 0.073$ | 0.283<br>$\pm 0.039$  | 0.283<br>$\pm 0.042$  | 0.293<br>$\pm 0.016$ | 0.290<br>$\pm 0.045$ | 0.315<br>$\pm 0.026$  | 0.283<br>$\pm 0.005$  | 0.271<br>$\pm 0.032$  | 0.448<br>$\pm 0.054$ | 0.295<br>$\pm 0.040$ | 0.388<br>$\pm 0.038$        | 0.299<br>$\pm 0.045$ | 0.451<br>$\pm 0.029$        | 0.280<br>$\pm 0.031$ |
|         | $\kappa$ | 0.094<br>$\pm 0.035$        | 0.067<br>$\pm 0.018$ | 0.053<br>$\pm 0.041$        | <b>0.083</b><br>$\pm 0.026$ | -0.022<br>$\pm 0.055$ | -0.011<br>$\pm 0.025$ | 0.006<br>$\pm 0.019$ | 0.017<br>$\pm 0.032$  | 0.011<br>$\pm 0.046$  | 0.003<br>$\pm 0.006$ | 0.011<br>$\pm 0.086$ | -0.011<br>$\pm 0.063$ | -0.006<br>$\pm 0.012$ | -0.014<br>$\pm 0.026$ | 0.036<br>$\pm 0.012$ | 0.022<br>$\pm 0.008$ | 0.017<br>$\pm 0.021$        | 0.017<br>$\pm 0.039$ | 0.056<br>$\pm 0.035$        | 0.011<br>$\pm 0.012$ |
| sub3    | AUC      | <b>0.597</b><br>$\pm 0.016$ | 0.595<br>$\pm 0.013$ | 0.570<br>$\pm 0.037$        | 0.605<br>$\pm 0.021$        | 0.493<br>$\pm 0.043$  | 0.478<br>$\pm 0.047$  | 0.516<br>$\pm 0.014$ | 0.499<br>$\pm 0.032$  | 0.498<br>$\pm 0.053$  | 0.464<br>$\pm 0.024$ | 0.508<br>$\pm 0.038$ | 0.476<br>$\pm 0.047$  | 0.492<br>$\pm 0.020$  | 0.505<br>$\pm 0.037$  | 0.549<br>$\pm 0.033$ | 0.533<br>$\pm 0.060$ | 0.526<br>$\pm 0.038$        | 0.524<br>$\pm 0.051$ | 0.547<br>$\pm 0.017$        | 0.523<br>$\pm 0.026$ |
|         | BAcc     | 0.224<br>$\pm 0.030$        | 0.200<br>$\pm 0.016$ | 0.188<br>$\pm 0.035$        | <b>0.214</b><br>$\pm 0.022$ | 0.124<br>$\pm 0.047$  | 0.133<br>$\pm 0.021$  | 0.148<br>$\pm 0.016$ | 0.157<br>$\pm 0.027$  | 0.152<br>$\pm 0.040$  | 0.145<br>$\pm 0.005$ | 0.152<br>$\pm 0.074$ | 0.133<br>$\pm 0.054$  | 0.138<br>$\pm 0.011$  | 0.131<br>$\pm 0.022$  | 0.174<br>$\pm 0.011$ | 0.162<br>$\pm 0.007$ | 0.157<br>$\pm 0.018$        | 0.157<br>$\pm 0.033$ | 0.190<br>$\pm 0.030$        | 0.152<br>$\pm 0.010$ |
|         | Acc.1    | 0.224<br>$\pm 0.030$        | 0.200<br>$\pm 0.016$ | 0.188<br>$\pm 0.035$        | <b>0.214</b><br>$\pm 0.022$ | 0.126<br>$\pm 0.051$  | 0.134<br>$\pm 0.021$  | 0.148<br>$\pm 0.016$ | 0.157<br>$\pm 0.027$  | 0.152<br>$\pm 0.043$  | 0.138<br>$\pm 0.007$ | 0.148<br>$\pm 0.074$ | 0.130<br>$\pm 0.058$  | 0.125<br>$\pm 0.015$  | 0.131<br>$\pm 0.022$  | 0.174<br>$\pm 0.011$ | 0.162<br>$\pm 0.007$ | 0.159<br>$\pm 0.023$        | 0.159<br>$\pm 0.034$ | 0.187<br>$\pm 0.036$        | 0.148<br>$\pm 0.003$ |
|         | Acc.2    | <b>0.357</b><br>$\pm 0.048$ | 0.369<br>$\pm 0.022$ | <b>0.357</b><br>$\pm 0.051$ | 0.352<br>$\pm 0.011$        | 0.288<br>$\pm 0.057$  | 0.299<br>$\pm 0.055$  | 0.281<br>$\pm 0.035$ | 0.288<br>$\pm 0.054$  | 0.255<br>$\pm 0.051$  | 0.276<br>$\pm 0.016$ | 0.296<br>$\pm 0.064$ | 0.270<br>$\pm 0.081$  | 0.270<br>$\pm 0.031$  | 0.279<br>$\pm 0.062$  | 0.336<br>$\pm 0.042$ | 0.288<br>$\pm 0.020$ | 0.302<br>$\pm 0.047$        | 0.314<br>$\pm 0.025$ | 0.334<br>$\pm 0.055$        | 0.302<br>$\pm 0.041$ |
|         | $\kappa$ | 0.125<br>$\pm 0.066$        | 0.100<br>$\pm 0.092$ | 0.061<br>$\pm 0.053$        | 0.092<br>$\pm 0.025$        | 0.028<br>$\pm 0.045$  | -0.014<br>$\pm 0.017$ | 0.075<br>$\pm 0.036$ | -0.025<br>$\pm 0.046$ | -0.011<br>$\pm 0.030$ | 0.011<br>$\pm 0.018$ | 0.014<br>$\pm 0.082$ | 0.003<br>$\pm 0.057$  | 0.000<br>$\pm 0.000$  | 0.025<br>$\pm 0.043$  | 0.128<br>$\pm 0.041$ | 0.053<br>$\pm 0.053$ | 0.172<br>$\pm 0.045$        | 0.050<br>$\pm 0.071$ | <b>0.147</b><br>$\pm 0.053$ | 0.033<br>$\pm 0.016$ |
| sub4    | AUC      | 0.655<br>$\pm 0.028$        | 0.622<br>$\pm 0.061$ | 0.602<br>$\pm 0.022$        | 0.502<br>$\pm 0.025$        | 0.617<br>$\pm 0.027$  | 0.502<br>$\pm 0.009$  | 0.554<br>$\pm 0.028$ | 0.492<br>$\pm 0.021$  | 0.515<br>$\pm 0.030$  | 0.517<br>$\pm 0.030$ | 0.514<br>$\pm 0.051$ | 0.513<br>$\pm 0.034$  | 0.496<br>$\pm 0.008$  | 0.534<br>$\pm 0.033$  | 0.592<br>$\pm 0.034$ | 0.543<br>$\pm 0.046$ | <b>0.641</b><br>$\pm 0.023$ | 0.565<br>$\pm 0.028$ | 0.625<br>$\pm 0.054$        | 0.560<br>$\pm 0.032$ |

Continued on next page

| SubjectMetric |          | DeepConvnet     | EEGNet          | Conformer       | CTNet           | BIOT (f)         | BIOT (l)         | BENDR (f)       | BENDR (l)       | CBraMod (f)      | CBraMod (l)      | EEGPT (f)       | EEGPT (l)        | LaBraM (f)       | LaBraM (l)       | STEEGformer-s (f) | STEEGformer-s (l) | STEEGformer-b (f) | STEEGformer-b (l) | STEEGformer-l (f) | STEEGformer-l (l) |
|---------------|----------|-----------------|-----------------|-----------------|-----------------|------------------|------------------|-----------------|-----------------|------------------|------------------|-----------------|------------------|------------------|------------------|-------------------|-------------------|-------------------|-------------------|-------------------|-------------------|
| sub5          | BAcc     | 0.250<br>±0.056 | 0.229<br>±0.079 | 0.195<br>±0.046 | 0.221<br>±0.022 | 0.167<br>±0.039  | 0.131<br>±0.015  | 0.207<br>±0.031 | 0.121<br>±0.040 | 0.133<br>±0.026  | 0.152<br>±0.016  | 0.155<br>±0.070 | 0.145<br>±0.049  | 0.143<br>±0.000  | 0.164<br>±0.037  | 0.252<br>±0.035   | 0.188<br>±0.046   | 0.290<br>±0.038   | 0.186<br>±0.061   | 0.269<br>±0.046   | 0.171<br>±0.014   |
|               | Acc_1    | 0.248<br>±0.053 | 0.229<br>±0.079 | 0.195<br>±0.046 | 0.221<br>±0.022 | 0.167<br>±0.039  | 0.131<br>±0.015  | 0.207<br>±0.031 | 0.121<br>±0.040 | 0.133<br>±0.026  | 0.155<br>±0.019  | 0.162<br>±0.065 | 0.145<br>±0.047  | 0.143<br>±0.000  | 0.164<br>±0.037  | 0.252<br>±0.035   | 0.186<br>±0.043   | 0.290<br>±0.041   | 0.189<br>±0.060   | 0.274<br>±0.050   | 0.170<br>±0.014   |
|               | Acc_2    | 0.460<br>±0.060 | 0.402<br>±0.115 | 0.407<br>±0.065 | 0.364<br>±0.054 | 0.305<br>±0.064  | 0.264<br>±0.036  | 0.343<br>±0.021 | 0.267<br>±0.022 | 0.293<br>±0.054  | 0.317<br>±0.036  | 0.296<br>±0.047 | 0.281<br>±0.050  | 0.283<br>±0.005  | 0.312<br>±0.016  | 0.414<br>±0.051   | 0.343<br>±0.078   | 0.451<br>±0.023   | 0.342<br>±0.053   | 0.453<br>±0.091   | 0.337<br>±0.040   |
|               | $\kappa$ | 0.172<br>±0.099 | 0.167<br>±0.054 | 0.108<br>±0.039 | 0.111<br>±0.058 | -0.006<br>±0.012 | -0.019<br>±0.027 | 0.033<br>±0.053 | 0.044<br>±0.051 | -0.025<br>±0.045 | -0.008<br>±0.012 | 0.008<br>±0.012 | -0.000<br>±0.035 | 0.000<br>±0.000  | 0.014<br>±0.017  | 0.153<br>±0.073   | 0.056<br>±0.064   | 0.119<br>±0.061   | 0.039<br>±0.054   | 0.175<br>±0.050   | 0.011<br>±0.037   |
|               | AUC      | 0.656<br>±0.057 | 0.652<br>±0.049 | 0.617<br>±0.028 | 0.651<br>±0.040 | 0.505<br>±0.022  | 0.518<br>±0.039  | 0.578<br>±0.042 | 0.545<br>±0.029 | 0.479<br>±0.035  | 0.535<br>±0.038  | 0.510<br>±0.040 | 0.519<br>±0.040  | 0.500<br>±0.000  | 0.542<br>±0.005  | 0.610<br>±0.050   | 0.532<br>±0.049   | 0.596<br>±0.024   | 0.558<br>±0.037   | 0.657<br>±0.042   | 0.554<br>±0.048   |
|               | BAcc     | 0.290<br>±0.084 | 0.286<br>±0.046 | 0.236<br>±0.033 | 0.238<br>±0.050 | 0.138<br>±0.011  | 0.126<br>±0.023  | 0.171<br>±0.045 | 0.181<br>±0.044 | 0.121<br>±0.039  | 0.136<br>±0.011  | 0.150<br>±0.011 | 0.143<br>±0.030  | 0.143<br>±0.000  | 0.155<br>±0.015  | 0.274<br>±0.063   | 0.190<br>±0.055   | 0.245<br>±0.052   | 0.176<br>±0.046   | 0.293<br>±0.043   | 0.152<br>±0.032   |
| sub6          | Acc_1    | 0.290<br>±0.084 | 0.286<br>±0.046 | 0.236<br>±0.033 | 0.238<br>±0.050 | 0.132<br>±0.013  | 0.125<br>±0.026  | 0.171<br>±0.045 | 0.181<br>±0.044 | 0.128<br>±0.044  | 0.138<br>±0.007  | 0.152<br>±0.007 | 0.144<br>±0.028  | 0.139<br>±0.005  | 0.155<br>±0.015  | 0.274<br>±0.063   | 0.193<br>±0.054   | 0.246<br>±0.047   | 0.177<br>±0.045   | 0.291<br>±0.043   | 0.151<br>±0.027   |
|               | Acc_2    | 0.450<br>±0.098 | 0.445<br>±0.081 | 0.402<br>±0.055 | 0.445<br>±0.073 | 0.283<br>±0.021  | 0.280<br>±0.037  | 0.340<br>±0.035 | 0.338<br>±0.018 | 0.249<br>±0.023  | 0.293<br>±0.020  | 0.305<br>±0.050 | 0.312<br>±0.046  | 0.285<br>±0.009  | 0.288<br>±0.027  | 0.440<br>±0.069   | 0.329<br>±0.057   | 0.410<br>±0.054   | 0.345<br>±0.055   | 0.487<br>±0.035   | 0.312<br>±0.040   |
|               | $\kappa$ | 0.164<br>±0.036 | 0.103<br>±0.036 | 0.114<br>±0.056 | 0.100<br>±0.051 | 0.000<br>±0.052  | -0.008<br>±0.021 | 0.028<br>±0.020 | 0.031<br>±0.036 | 0.008<br>±0.012  | 0.000<br>±0.000  | 0.014<br>±0.056 | 0.017<br>±0.023  | 0.000<br>±0.000  | -0.003<br>±0.006 | 0.125<br>±0.035   | 0.031<br>±0.018   | 0.119<br>±0.068   | 0.008<br>±0.016   | 0.172<br>±0.025   | 0.069<br>±0.017   |
|               | AUC      | 0.654<br>±0.034 | 0.615<br>±0.034 | 0.632<br>±0.044 | 0.624<br>±0.020 | 0.498<br>±0.062  | 0.490<br>±0.030  | 0.576<br>±0.026 | 0.511<br>±0.044 | 0.486<br>±0.057  | 0.504<br>±0.022  | 0.525<br>±0.031 | 0.520<br>±0.045  | 0.501<br>±0.002  | 0.526<br>±0.025  | 0.603<br>±0.014   | 0.541<br>±0.039   | 0.616<br>±0.040   | 0.533<br>±0.017   | 0.644<br>±0.011   | 0.522<br>±0.019   |
|               | BAcc     | 0.283<br>±0.031 | 0.231<br>±0.031 | 0.240<br>±0.048 | 0.229<br>±0.044 | 0.143<br>±0.045  | 0.136<br>±0.018  | 0.167<br>±0.017 | 0.169<br>±0.031 | 0.150<br>±0.011  | 0.143<br>±0.000  | 0.155<br>±0.048 | 0.157<br>±0.020  | 0.143<br>±0.000  | 0.140<br>±0.005  | 0.250<br>±0.030   | 0.169<br>±0.016   | 0.245<br>±0.058   | 0.150<br>±0.014   | 0.290<br>±0.022   | 0.202<br>±0.015   |
| sub7          | Acc_1    | 0.283<br>±0.031 | 0.233<br>±0.030 | 0.240<br>±0.048 | 0.229<br>±0.044 | 0.143<br>±0.045  | 0.136<br>±0.018  | 0.167<br>±0.017 | 0.167<br>±0.030 | 0.148<br>±0.007  | 0.143<br>±0.000  | 0.159<br>±0.045 | 0.163<br>±0.021  | 0.143<br>±0.000  | 0.140<br>±0.005  | 0.250<br>±0.030   | 0.169<br>±0.016   | 0.246<br>±0.062   | 0.151<br>±0.017   | 0.288<br>±0.025   | 0.209<br>±0.021   |
|               | Acc_2    | 0.455<br>±0.054 | 0.395<br>±0.026 | 0.433<br>±0.059 | 0.414<br>±0.047 | 0.264<br>±0.074  | 0.288<br>±0.020  | 0.369<br>±0.049 | 0.324<br>±0.055 | 0.290<br>±0.011  | 0.286<br>±0.000  | 0.302<br>±0.066 | 0.318<br>±0.075  | 0.286<br>±0.000  | 0.279<br>±0.011  | 0.407<br>±0.020   | 0.307<br>±0.046   | 0.413<br>±0.071   | 0.331<br>±0.029   | 0.484<br>±0.044   | 0.320<br>±0.012   |
|               | $\kappa$ | 0.067<br>±0.065 | 0.061<br>±0.023 | 0.050<br>±0.038 | 0.092<br>±0.049 | 0.008<br>±0.049  | 0.031<br>±0.069  | 0.061<br>±0.079 | 0.008<br>±0.040 | 0.028<br>±0.056  | -0.003<br>±0.006 | 0.042<br>±0.017 | 0.025<br>±0.054  | -0.003<br>±0.006 | -0.022<br>±0.050 | 0.067<br>±0.053   | 0.022<br>±0.032   | 0.100<br>±0.082   | 0.028<br>±0.038   | 0.100<br>±0.082   | 0.008<br>±0.048   |
|               | AUC      | 0.574<br>±0.030 | 0.597<br>±0.011 | 0.576<br>±0.023 | 0.601<br>±0.022 | 0.511<br>±0.026  | 0.517<br>±0.034  | 0.563<br>±0.045 | 0.506<br>±0.027 | 0.533<br>±0.062  | 0.501<br>±0.027  | 0.526<br>±0.025 | 0.530<br>±0.029  | 0.508<br>±0.038  | 0.500<br>±0.037  | 0.568<br>±0.041   | 0.538<br>±0.048   | 0.594<br>±0.048   | 0.552<br>±0.055   | 0.621<br>±0.053   | 0.541<br>±0.053   |
|               | BAcc     | 0.200<br>±0.055 | 0.195<br>±0.020 | 0.186<br>±0.032 | 0.221<br>±0.042 | 0.169<br>±0.042  | 0.169<br>±0.059  | 0.195<br>±0.068 | 0.150<br>±0.034 | 0.167<br>±0.048  | 0.140<br>±0.005  | 0.179<br>±0.015 | 0.164<br>±0.046  | 0.140<br>±0.005  | 0.124<br>±0.043  | 0.200<br>±0.046   | 0.162<br>±0.027   | 0.229<br>±0.070   | 0.167<br>±0.033   | 0.229<br>±0.070   | 0.150<br>±0.041   |

Continued on next page



| SubjectMetric |          | DeepConvnet                    | EEGNet                         | Conformer       | CTNet                          | BIOT (f)         | BIOT (l)         | BENDR (f)       | BENDR (l)        | CBraMod (f)      | CBraMod (l)      | EEGPT (f)        | EEGPT (l)        | LaBraM (f)      | LaBraM (l)       | STEEGformer-s (f) | STEEGformer-s (l) | STEEGformer-b (f)              | STEEGformer-b (l) | STEEGformer-l (f)              | STEEGformer-l (l) |
|---------------|----------|--------------------------------|--------------------------------|-----------------|--------------------------------|------------------|------------------|-----------------|------------------|------------------|------------------|------------------|------------------|-----------------|------------------|-------------------|-------------------|--------------------------------|-------------------|--------------------------------|-------------------|
|               | Acc.1    | 0.200<br>±0.055                | 0.195<br>±0.020                | 0.186<br>±0.032 | 0.221<br>±0.042                | 0.150<br>±0.042  | 0.169<br>±0.059  | 0.195<br>±0.068 | 0.150<br>±0.034  | 0.167<br>±0.048  | 0.140<br>±0.005  | 0.176<br>±0.028  | 0.159<br>±0.043  | 0.136<br>±0.011 | 0.126<br>±0.040  | 0.200<br>±0.046   | 0.162<br>±0.027   | 0.234<br>±0.069                | 0.163<br>±0.030   | <b>0.228</b><br>± <b>0.064</b> | 0.143<br>±0.035   |
|               | Acc.2    | 0.360<br>±0.030                | 0.393<br>±0.031                | 0.331<br>±0.051 | 0.393<br>±0.062                | 0.295<br>±0.042  | 0.293<br>±0.068  | 0.360<br>±0.046 | 0.300<br>±0.045  | 0.331<br>±0.066  | 0.286<br>±0.000  | 0.307<br>±0.052  | 0.307<br>±0.012  | 0.290<br>±0.011 | 0.314<br>±0.038  | 0.393<br>±0.030   | 0.331<br>±0.083   | <b>0.423</b><br>± <b>0.057</b> | 0.346<br>±0.078   | 0.435<br>±0.073                | 0.319<br>±0.053   |
|               | $\kappa$ | 0.075<br>±0.027                | 0.094<br>±0.035                | 0.064<br>±0.029 | 0.131<br>±0.057                | -0.028<br>±0.040 | 0.000<br>±0.000  | 0.047<br>±0.035 | -0.006<br>±0.042 | 0.003<br>±0.012  | -0.006<br>±0.008 | 0.011<br>±0.039  | -0.003<br>±0.036 | 0.000<br>±0.000 | -0.019<br>±0.029 | 0.089<br>±0.066   | -0.025<br>±0.040  | 0.094<br>±0.055                | 0.064<br>±0.059   | <b>0.122</b><br>± <b>0.062</b> | 0.006<br>±0.027   |
| sub8          | AUC      | <b>0.620</b><br>± <b>0.022</b> | 0.613<br>±0.033                | 0.588<br>±0.025 | 0.640<br>±0.044                | 0.503<br>±0.033  | 0.505<br>±0.044  | 0.557<br>±0.042 | 0.497<br>±0.024  | 0.517<br>±0.017  | 0.501<br>±0.053  | 0.498<br>±0.027  | 0.487<br>±0.027  | 0.496<br>±0.007 | 0.481<br>±0.033  | 0.583<br>±0.060   | 0.520<br>±0.014   | 0.588<br>±0.028                | 0.552<br>±0.035   | 0.615<br>±0.041                | 0.549<br>±0.010   |
|               | BAcc     | 0.207<br>±0.023                | 0.224<br>±0.030                | 0.198<br>±0.025 | 0.255<br>±0.049                | 0.119<br>±0.035  | 0.143<br>±0.000  | 0.183<br>±0.030 | 0.138<br>±0.036  | 0.145<br>±0.010  | 0.138<br>±0.007  | 0.152<br>±0.033  | 0.140<br>±0.031  | 0.143<br>±0.000 | 0.126<br>±0.025  | 0.219<br>±0.056   | 0.121<br>±0.034   | 0.224<br>±0.047                | 0.198<br>±0.051   | <b>0.248</b><br>± <b>0.054</b> | 0.148<br>±0.023   |
|               | Acc.1    | 0.207<br>±0.023                | 0.224<br>±0.030                | 0.198<br>±0.025 | 0.252<br>±0.051                | 0.119<br>±0.035  | 0.143<br>±0.000  | 0.183<br>±0.030 | 0.138<br>±0.036  | 0.145<br>±0.010  | 0.138<br>±0.007  | 0.150<br>±0.028  | 0.139<br>±0.031  | 0.143<br>±0.000 | 0.129<br>±0.027  | 0.219<br>±0.056   | 0.121<br>±0.034   | 0.222<br>±0.051                | 0.199<br>±0.051   | <b>0.249</b><br>± <b>0.057</b> | 0.158<br>±0.028   |
| sub9          | Acc.2    | 0.367<br>±0.036                | 0.395<br>±0.051                | 0.369<br>±0.048 | <b>0.414</b><br>± <b>0.060</b> | 0.290<br>±0.047  | 0.281<br>±0.039  | 0.357<br>±0.055 | 0.281<br>±0.029  | 0.293<br>±0.022  | 0.286<br>±0.008  | 0.276<br>±0.036  | 0.289<br>±0.025  | 0.286<br>±0.000 | 0.283<br>±0.010  | 0.386<br>±0.062   | 0.295<br>±0.039   | 0.407<br>±0.047                | 0.328<br>±0.047   | 0.435<br>±0.067                | 0.302<br>±0.029   |
|               | $\kappa$ | 0.086<br>±0.066                | 0.069<br>±0.028                | 0.072<br>±0.076 | 0.036<br>±0.069                | 0.022<br>±0.036  | -0.003<br>±0.027 | 0.058<br>±0.055 | -0.011<br>±0.053 | -0.003<br>±0.052 | -0.003<br>±0.006 | -0.011<br>±0.055 | 0.028<br>±0.017  | 0.000<br>±0.000 | 0.017<br>±0.032  | 0.078<br>±0.008   | 0.011<br>±0.058   | 0.031<br>±0.028                | 0.008<br>±0.035   | <b>0.081</b><br>± <b>0.041</b> | 0.033<br>±0.019   |
|               | AUC      | <b>0.604</b><br>± <b>0.050</b> | 0.598<br>±0.039                | 0.564<br>±0.038 | 0.605<br>±0.052                | 0.511<br>±0.038  | 0.494<br>±0.030  | 0.551<br>±0.026 | 0.472<br>±0.037  | 0.487<br>±0.032  | 0.455<br>±0.034  | 0.508<br>±0.058  | 0.519<br>±0.030  | 0.500<br>±0.000 | 0.499<br>±0.034  | 0.565<br>±0.024   | 0.515<br>±0.016   | 0.552<br>±0.012                | 0.509<br>±0.011   | 0.576<br>±0.025                | 0.532<br>±0.024   |
|               | BAcc     | 0.217<br>±0.057                | 0.202<br>±0.024                | 0.205<br>±0.065 | 0.174<br>±0.059                | 0.162<br>±0.031  | 0.140<br>±0.023  | 0.193<br>±0.047 | 0.133<br>±0.046  | 0.140<br>±0.045  | 0.140<br>±0.005  | 0.133<br>±0.047  | 0.167<br>±0.015  | 0.143<br>±0.000 | 0.157<br>±0.027  | 0.210<br>±0.007   | 0.152<br>±0.050   | 0.169<br>±0.024                | 0.150<br>±0.030   | <b>0.212</b><br>± <b>0.035</b> | 0.171<br>±0.016   |
|               | Acc.1    | 0.217<br>±0.057                | 0.202<br>±0.024                | 0.205<br>±0.065 | 0.174<br>±0.059                | 0.160<br>±0.031  | 0.140<br>±0.023  | 0.193<br>±0.047 | 0.133<br>±0.046  | 0.135<br>±0.038  | 0.133<br>±0.016  | 0.130<br>±0.043  | 0.163<br>±0.021  | 0.139<br>±0.005 | 0.150<br>±0.027  | 0.210<br>±0.007   | 0.152<br>±0.050   | 0.172<br>±0.020                | 0.151<br>±0.032   | <b>0.210</b><br>± <b>0.037</b> | 0.170<br>±0.016   |
|               | Acc.2    | 0.355<br>±0.081                | <b>0.376</b><br>± <b>0.050</b> | 0.371<br>±0.064 | 0.360<br>±0.059                | 0.295<br>±0.066  | 0.305<br>±0.037  | 0.352<br>±0.046 | 0.255<br>±0.066  | 0.279<br>±0.021  | 0.274<br>±0.017  | 0.263<br>±0.070  | 0.328<br>±0.039  | 0.285<br>±0.007 | 0.281<br>±0.038  | 0.374<br>±0.038   | 0.329<br>±0.040   | 0.347<br>±0.054                | 0.323<br>±0.026   | 0.381<br>±0.047                | 0.316<br>±0.041   |

## D.3.2 LEAVE-ONE-OUT FINE-TUNING RESULTS

Table 35: Average Leave-One-Out Fine-Tuned Performance Across All Subjects.

| Model (Training strategy) | $\kappa$     | AUC          | BAcc         | Acc.1        | Acc.2        |
|---------------------------|--------------|--------------|--------------|--------------|--------------|
|                           | 0.144        | 0.648        | 0.266        | 0.266        | 0.447        |
| <b>DeepConvnet</b>        | $\pm 0.048$  | $\pm 0.031$  | $\pm 0.041$  | $\pm 0.042$  | $\pm 0.040$  |
|                           | 0.136        | 0.643        | 0.259        | 0.259        | 0.442        |
| <b>EEGNet</b>             | $\pm 0.034$  | $\pm 0.028$  | $\pm 0.029$  | $\pm 0.029$  | $\pm 0.033$  |
|                           | 0.121        | 0.626        | 0.247        | 0.247        | 0.430        |
| <b>Conformer</b>          | $\pm 0.034$  | $\pm 0.027$  | $\pm 0.030$  | $\pm 0.030$  | $\pm 0.032$  |
|                           | 0.147        | <b>0.648</b> | 0.269        | 0.269        | <b>0.456</b> |
| <b>CTNet</b>              | $\pm 0.039$  | $\pm 0.027$  | $\pm 0.034$  | $\pm 0.034$  | $\pm 0.038$  |
|                           | 0.016        | 0.513        | 0.157        | 0.157        | 0.300        |
| <b>BIOT (f)</b>           | $\pm 0.019$  | $\pm 0.013$  | $\pm 0.017$  | $\pm 0.016$  | $\pm 0.018$  |
|                           | -0.014       | 0.482        | 0.131        | 0.131        | 0.263        |
| <b>BIOT (l)</b>           | $\pm 0.017$  | $\pm 0.019$  | $\pm 0.015$  | $\pm 0.015$  | $\pm 0.020$  |
|                           | 0.063        | 0.571        | 0.197        | 0.196        | 0.361        |
| <b>BENDR (f)</b>          | $\pm 0.032$  | $\pm 0.030$  | $\pm 0.027$  | $\pm 0.027$  | $\pm 0.039$  |
|                           | 0.008        | 0.517        | 0.149        | 0.150        | 0.311        |
| <b>BENDR (l)</b>          | $\pm 0.024$  | $\pm 0.015$  | $\pm 0.020$  | $\pm 0.020$  | $\pm 0.020$  |
|                           | -0.008       | 0.491        | 0.136        | 0.137        | 0.276        |
| <b>CBraMod (f)</b>        | $\pm 0.015$  | $\pm 0.015$  | $\pm 0.013$  | $\pm 0.013$  | $\pm 0.021$  |
|                           | 0.000        | 0.498        | 0.143        | 0.143        | 0.285        |
| <b>CBraMod (l)</b>        | $\pm 0.001$  | $\pm 0.007$  | $\pm 0.001$  | $\pm 0.001$  | $\pm 0.001$  |
|                           | 0.015        | 0.521        | 0.156        | 0.157        | 0.314        |
| <b>EEGPT (f)</b>          | $\pm 0.020$  | $\pm 0.017$  | $\pm 0.017$  | $\pm 0.017$  | $\pm 0.022$  |
|                           | 0.004        | 0.516        | 0.146        | 0.146        | 0.299        |
| <b>EEGPT (l)</b>          | $\pm 0.024$  | $\pm 0.022$  | $\pm 0.021$  | $\pm 0.023$  | $\pm 0.027$  |
|                           | -0.006       | 0.480        | 0.138        | 0.136        | 0.273        |
| <b>LaBraM (f)</b>         | $\pm 0.012$  | $\pm 0.016$  | $\pm 0.010$  | $\pm 0.010$  | $\pm 0.015$  |
|                           | -0.033       | 0.460        | 0.115        | 0.114        | 0.243        |
| <b>LaBraM (l)</b>         | $\pm 0.018$  | $\pm 0.022$  | $\pm 0.016$  | $\pm 0.015$  | $\pm 0.027$  |
|                           | <b>0.156</b> | 0.625        | <b>0.277</b> | <b>0.277</b> | 0.446        |
| <b>STEEGformer-s (f)</b>  | $\pm 0.036$  | $\pm 0.024$  | $\pm 0.031$  | $\pm 0.031$  | $\pm 0.036$  |
|                           | 0.022        | 0.516        | 0.162        | 0.162        | 0.305        |
| <b>STEEGformer-s (l)</b>  | $\pm 0.017$  | $\pm 0.018$  | $\pm 0.014$  | $\pm 0.014$  | $\pm 0.022$  |
|                           | 0.153        | 0.636        | 0.274        | 0.274        | 0.454        |
| <b>STEEGformer-b (f)</b>  | $\pm 0.047$  | $\pm 0.031$  | $\pm 0.040$  | $\pm 0.043$  | $\pm 0.044$  |
|                           | 0.044        | 0.530        | 0.181        | 0.181        | 0.321        |
| <b>STEEGformer-b (l)</b>  | $\pm 0.027$  | $\pm 0.024$  | $\pm 0.023$  | $\pm 0.024$  | $\pm 0.027$  |
|                           | 0.199        | 0.671        | 0.313        | 0.314        | 0.511        |
| <b>STEEGformer-l (f)</b>  | $\pm 0.046$  | $\pm 0.034$  | $\pm 0.040$  | $\pm 0.040$  | $\pm 0.045$  |
|                           | 0.030        | 0.537        | 0.169        | 0.169        | 0.325        |
| <b>STEEGformer-l (l)</b>  | $\pm 0.028$  | $\pm 0.023$  | $\pm 0.024$  | $\pm 0.023$  | $\pm 0.023$  |

Table 36: Per-Subject Leave-One-Out Fine-Tuned Performance.

| Subject | Metric           | DeepConvnet          | EEGNet                      | Conformer                   | CTNet                | BIOT (f)             | BIOT (l)              | BENDR (f)            | BENDR (l)             | CBraMod (f)           | CBraMod (l)          | EEGPT (f)             | EEGPT (l)             | LaBraM (f)            | LaBraM (l)            | STEEGformer-s (f)           | STEEGformer-s (l)    | STEEGformer-b (f)           | STEEGformer-b (l)    | STEEGformer-l (f)           | STEEGformer-l (l)    |
|---------|------------------|----------------------|-----------------------------|-----------------------------|----------------------|----------------------|-----------------------|----------------------|-----------------------|-----------------------|----------------------|-----------------------|-----------------------|-----------------------|-----------------------|-----------------------------|----------------------|-----------------------------|----------------------|-----------------------------|----------------------|
| sub1    | $\kappa$         | 0.106<br>$\pm 0.074$ | 0.139<br>$\pm 0.033$        | 0.117<br>$\pm 0.064$        | 0.128<br>$\pm 0.066$ | 0.022<br>$\pm 0.066$ | -0.000<br>$\pm 0.031$ | 0.056<br>$\pm 0.059$ | 0.003<br>$\pm 0.050$  | -0.003<br>$\pm 0.042$ | 0.003<br>$\pm 0.006$ | -0.011<br>$\pm 0.049$ | -0.006<br>$\pm 0.032$ | -0.011<br>$\pm 0.018$ | -0.003<br>$\pm 0.036$ | 0.136<br>$\pm 0.012$        | 0.025<br>$\pm 0.032$ | <b>0.158</b><br>$\pm 0.088$ | 0.053<br>$\pm 0.036$ | 0.183<br>$\pm 0.053$        | 0.089<br>$\pm 0.063$ |
|         | AUC              | 0.628<br>$\pm 0.046$ | <b>0.650</b><br>$\pm 0.027$ | 0.628<br>$\pm 0.037$        | 0.643<br>$\pm 0.037$ | 0.495<br>$\pm 0.032$ | 0.487<br>$\pm 0.035$  | 0.566<br>$\pm 0.025$ | 0.511<br>$\pm 0.053$  | 0.506<br>$\pm 0.053$  | 0.507<br>$\pm 0.017$ | 0.491<br>$\pm 0.028$  | 0.507<br>$\pm 0.017$  | 0.484<br>$\pm 0.027$  | 0.463<br>$\pm 0.020$  | 0.609<br>$\pm 0.017$        | 0.518<br>$\pm 0.045$ | 0.638<br>$\pm 0.041$        | 0.539<br>$\pm 0.036$ | 0.662<br>$\pm 0.036$        | 0.566<br>$\pm 0.042$ |
|         | BAcc             | 0.233<br>$\pm 0.063$ | 0.262<br>$\pm 0.028$        | 0.243<br>$\pm 0.055$        | 0.252<br>$\pm 0.057$ | 0.162<br>$\pm 0.057$ | 0.143<br>$\pm 0.027$  | 0.190<br>$\pm 0.051$ | 0.145<br>$\pm 0.043$  | 0.140<br>$\pm 0.036$  | 0.145<br>$\pm 0.005$ | 0.133<br>$\pm 0.042$  | 0.138<br>$\pm 0.027$  | 0.133<br>$\pm 0.016$  | 0.140<br>$\pm 0.031$  | 0.260<br>$\pm 0.010$        | 0.164<br>$\pm 0.027$ | <b>0.279</b><br>$\pm 0.076$ | 0.188<br>$\pm 0.031$ | 0.300<br>$\pm 0.046$        | 0.219<br>$\pm 0.054$ |
|         | Acc <sub>1</sub> | 0.231<br>$\pm 0.062$ | 0.262<br>$\pm 0.028$        | 0.243<br>$\pm 0.055$        | 0.252<br>$\pm 0.057$ | 0.162<br>$\pm 0.057$ | 0.143<br>$\pm 0.027$  | 0.190<br>$\pm 0.051$ | 0.145<br>$\pm 0.043$  | 0.140<br>$\pm 0.036$  | 0.143<br>$\pm 0.000$ | 0.133<br>$\pm 0.045$  | 0.143<br>$\pm 0.026$  | 0.131<br>$\pm 0.021$  | 0.138<br>$\pm 0.026$  | 0.260<br>$\pm 0.010$        | 0.164<br>$\pm 0.027$ | <b>0.273</b><br>$\pm 0.070$ | 0.186<br>$\pm 0.036$ | 0.301<br>$\pm 0.047$        | 0.217<br>$\pm 0.052$ |
|         | Acc <sub>2</sub> | 0.438<br>$\pm 0.084$ | 0.417<br>$\pm 0.030$        | 0.424<br>$\pm 0.060$        | 0.433<br>$\pm 0.047$ | 0.307<br>$\pm 0.049$ | 0.290<br>$\pm 0.042$  | 0.367<br>$\pm 0.026$ | 0.293<br>$\pm 0.043$  | 0.295<br>$\pm 0.054$  | 0.286<br>$\pm 0.000$ | 0.273<br>$\pm 0.062$  | 0.289<br>$\pm 0.024$  | 0.276<br>$\pm 0.013$  | 0.260<br>$\pm 0.042$  | 0.421<br>$\pm 0.036$        | 0.317<br>$\pm 0.056$ | <b>0.465</b><br>$\pm 0.056$ | 0.317<br>$\pm 0.053$ | 0.494<br>$\pm 0.083$        | 0.330<br>$\pm 0.061$ |
| sub10   | $\kappa$         | 0.086<br>$\pm 0.028$ | <b>0.139</b><br>$\pm 0.068$ | 0.061<br>$\pm 0.029$        | 0.111<br>$\pm 0.026$ | 0.000<br>$\pm 0.043$ | -0.011<br>$\pm 0.027$ | 0.028<br>$\pm 0.040$ | -0.008<br>$\pm 0.047$ | 0.000<br>$\pm 0.035$  | 0.003<br>$\pm 0.006$ | 0.039<br>$\pm 0.046$  | -0.017<br>$\pm 0.021$ | -0.042<br>$\pm 0.042$ | -0.028<br>$\pm 0.049$ | 0.136<br>$\pm 0.099$        | 0.036<br>$\pm 0.036$ | 0.089<br>$\pm 0.073$        | 0.075<br>$\pm 0.061$ | 0.153<br>$\pm 0.038$        | 0.036<br>$\pm 0.043$ |
|         | AUC              | 0.614<br>$\pm 0.022$ | 0.638<br>$\pm 0.037$        | 0.572<br>$\pm 0.031$        | 0.616<br>$\pm 0.031$ | 0.507<br>$\pm 0.030$ | 0.476<br>$\pm 0.032$  | 0.559<br>$\pm 0.028$ | 0.512<br>$\pm 0.022$  | 0.497<br>$\pm 0.039$  | 0.490<br>$\pm 0.016$ | 0.551<br>$\pm 0.042$  | 0.490<br>$\pm 0.034$  | 0.449<br>$\pm 0.049$  | 0.475<br>$\pm 0.041$  | 0.608<br>$\pm 0.068$        | 0.509<br>$\pm 0.061$ | 0.599<br>$\pm 0.051$        | 0.530<br>$\pm 0.053$ | <b>0.633</b><br>$\pm 0.020$ | 0.551<br>$\pm 0.032$ |
|         | BAcc             | 0.217<br>$\pm 0.024$ | <b>0.262</b><br>$\pm 0.058$ | 0.195<br>$\pm 0.025$        | 0.238<br>$\pm 0.022$ | 0.143<br>$\pm 0.037$ | 0.133<br>$\pm 0.023$  | 0.167<br>$\pm 0.035$ | 0.136<br>$\pm 0.040$  | 0.143<br>$\pm 0.030$  | 0.145<br>$\pm 0.005$ | 0.176<br>$\pm 0.040$  | 0.129<br>$\pm 0.018$  | 0.107<br>$\pm 0.036$  | 0.119<br>$\pm 0.042$  | 0.260<br>$\pm 0.085$        | 0.174<br>$\pm 0.031$ | 0.219<br>$\pm 0.062$        | 0.207<br>$\pm 0.052$ | 0.274<br>$\pm 0.033$        | 0.174<br>$\pm 0.037$ |
|         | Acc <sub>1</sub> | 0.217<br>$\pm 0.024$ | <b>0.262</b><br>$\pm 0.058$ | 0.195<br>$\pm 0.025$        | 0.238<br>$\pm 0.022$ | 0.143<br>$\pm 0.037$ | 0.133<br>$\pm 0.023$  | 0.167<br>$\pm 0.035$ | 0.136<br>$\pm 0.040$  | 0.145<br>$\pm 0.027$  | 0.145<br>$\pm 0.005$ | 0.180<br>$\pm 0.026$  | 0.128<br>$\pm 0.023$  | 0.105<br>$\pm 0.037$  | 0.119<br>$\pm 0.042$  | 0.260<br>$\pm 0.085$        | 0.174<br>$\pm 0.031$ | 0.215<br>$\pm 0.067$        | 0.201<br>$\pm 0.046$ | 0.270<br>$\pm 0.033$        | 0.175<br>$\pm 0.039$ |
|         | Acc <sub>2</sub> | 0.371<br>$\pm 0.023$ | 0.448<br>$\pm 0.052$        | 0.381<br>$\pm 0.042$        | 0.419<br>$\pm 0.023$ | 0.267<br>$\pm 0.034$ | 0.257<br>$\pm 0.034$  | 0.345<br>$\pm 0.035$ | 0.310<br>$\pm 0.049$  | 0.293<br>$\pm 0.067$  | 0.286<br>$\pm 0.000$ | 0.312<br>$\pm 0.019$  | 0.283<br>$\pm 0.054$  | 0.231<br>$\pm 0.052$  | 0.276<br>$\pm 0.064$  | <b>0.452</b><br>$\pm 0.088$ | 0.331<br>$\pm 0.073$ | 0.407<br>$\pm 0.110$        | 0.304<br>$\pm 0.074$ | 0.465<br>$\pm 0.037$        | 0.343<br>$\pm 0.037$ |
| sub11   | $\kappa$         | 0.089<br>$\pm 0.063$ | 0.103<br>$\pm 0.047$        | <b>0.128</b><br>$\pm 0.033$ | 0.106<br>$\pm 0.043$ | 0.008<br>$\pm 0.035$ | -0.022<br>$\pm 0.051$ | 0.028<br>$\pm 0.038$ | 0.011<br>$\pm 0.015$  | -0.008<br>$\pm 0.055$ | 0.003<br>$\pm 0.006$ | -0.025<br>$\pm 0.048$ | 0.039<br>$\pm 0.032$  | 0.000<br>$\pm 0.000$  | -0.069<br>$\pm 0.026$ | 0.117<br>$\pm 0.081$        | 0.058<br>$\pm 0.036$ | 0.119<br>$\pm 0.041$        | 0.036<br>$\pm 0.060$ | 0.139<br>$\pm 0.024$        | 0.000<br>$\pm 0.029$ |
|         | AUC              | 0.602<br>$\pm 0.019$ | 0.611<br>$\pm 0.028$        | 0.621<br>$\pm 0.030$        | 0.614<br>$\pm 0.025$ | 0.519<br>$\pm 0.032$ | 0.472<br>$\pm 0.020$  | 0.535<br>$\pm 0.043$ | 0.509<br>$\pm 0.050$  | 0.487<br>$\pm 0.040$  | 0.500<br>$\pm 0.000$ | 0.508<br>$\pm 0.012$  | 0.550<br>$\pm 0.039$  | 0.482<br>$\pm 0.025$  | 0.451<br>$\pm 0.011$  | 0.601<br>$\pm 0.048$        | 0.548<br>$\pm 0.030$ | <b>0.615</b><br>$\pm 0.024$ | 0.531<br>$\pm 0.023$ | 0.609<br>$\pm 0.039$        | 0.530<br>$\pm 0.030$ |
|         | BAcc             | 0.219<br>$\pm 0.054$ | 0.231<br>$\pm 0.040$        | <b>0.252</b><br>$\pm 0.028$ | 0.233<br>$\pm 0.037$ | 0.150<br>$\pm 0.030$ | 0.124<br>$\pm 0.043$  | 0.167<br>$\pm 0.033$ | 0.152<br>$\pm 0.013$  | 0.136<br>$\pm 0.047$  | 0.145<br>$\pm 0.005$ | 0.121<br>$\pm 0.041$  | 0.176<br>$\pm 0.027$  | 0.143<br>$\pm 0.000$  | 0.083<br>$\pm 0.022$  | 0.243<br>$\pm 0.070$        | 0.193<br>$\pm 0.031$ | 0.245<br>$\pm 0.035$        | 0.174<br>$\pm 0.052$ | 0.262<br>$\pm 0.021$        | 0.143<br>$\pm 0.025$ |
|         | Acc <sub>1</sub> | 0.219<br>$\pm 0.054$ | 0.231<br>$\pm 0.040$        | <b>0.252</b><br>$\pm 0.028$ | 0.233<br>$\pm 0.037$ | 0.150<br>$\pm 0.030$ | 0.124<br>$\pm 0.043$  | 0.167<br>$\pm 0.033$ | 0.152<br>$\pm 0.013$  | 0.136<br>$\pm 0.047$  | 0.143<br>$\pm 0.000$ | 0.124<br>$\pm 0.042$  | 0.169<br>$\pm 0.025$  | 0.140<br>$\pm 0.005$  | 0.083<br>$\pm 0.022$  | 0.243<br>$\pm 0.070$        | 0.193<br>$\pm 0.031$ | 0.243<br>$\pm 0.041$        | 0.173<br>$\pm 0.048$ | 0.259<br>$\pm 0.016$        | 0.146<br>$\pm 0.022$ |
|         | Acc <sub>2</sub> | 0.410<br>$\pm 0.057$ | 0.414<br>$\pm 0.058$        | 0.417<br>$\pm 0.042$        | 0.393<br>$\pm 0.051$ | 0.310<br>$\pm 0.059$ | 0.262<br>$\pm 0.021$  | 0.326<br>$\pm 0.040$ | 0.329<br>$\pm 0.095$  | 0.288<br>$\pm 0.079$  | 0.286<br>$\pm 0.000$ | 0.290<br>$\pm 0.045$  | 0.313<br>$\pm 0.034$  | 0.282<br>$\pm 0.008$  | 0.212<br>$\pm 0.044$  | 0.400<br>$\pm 0.082$        | 0.333<br>$\pm 0.019$ | 0.399<br>$\pm 0.028$        | 0.312<br>$\pm 0.033$ | <b>0.415</b><br>$\pm 0.057$ | 0.320<br>$\pm 0.029$ |

Continued on next page

| Subject                | Metric   | DeepConvnet                 | EEGNet                      | Conformer            | CTNet                       | BIOT (f)              | BIOT (l)              | BENDR (f)            | BENDR (l)            | CBraMod (f)           | CBraMod (l)           | EEGPT (f)            | EEGPT (l)             | LaBraM (f)            | LaBraM (l)            | STEEGformer-s (f)           | STEEGformer-s (l)    | STEEGformer-b (f)           | STEEGformer-b (l)    | STEEGformer-l (f)           | STEEGformer-l (l)     |
|------------------------|----------|-----------------------------|-----------------------------|----------------------|-----------------------------|-----------------------|-----------------------|----------------------|----------------------|-----------------------|-----------------------|----------------------|-----------------------|-----------------------|-----------------------|-----------------------------|----------------------|-----------------------------|----------------------|-----------------------------|-----------------------|
| sub12                  | $\kappa$ | 0.161<br>$\pm 0.068$        | 0.122<br>$\pm 0.018$        | 0.142<br>$\pm 0.033$ | 0.156<br>$\pm 0.072$        | 0.019<br>$\pm 0.047$  | -0.036<br>$\pm 0.030$ | 0.083<br>$\pm 0.047$ | 0.044<br>$\pm 0.063$ | -0.003<br>$\pm 0.048$ | 0.000<br>$\pm 0.000$  | 0.022<br>$\pm 0.038$ | 0.003<br>$\pm 0.025$  | -0.011<br>$\pm 0.023$ | -0.039<br>$\pm 0.035$ | 0.167<br>$\pm 0.038$        | 0.042<br>$\pm 0.042$ | <b>0.186</b><br>$\pm 0.094$ | 0.058<br>$\pm 0.036$ | 0.233<br>$\pm 0.073$        | 0.053<br>$\pm 0.039$  |
|                        | AUC      | <b>0.677</b><br>$\pm 0.036$ | 0.645<br>$\pm 0.026$        | 0.644<br>$\pm 0.034$ | 0.655<br>$\pm 0.038$        | 0.520<br>$\pm 0.047$  | 0.459<br>$\pm 0.017$  | 0.616<br>$\pm 0.054$ | 0.535<br>$\pm 0.026$ | 0.488<br>$\pm 0.036$  | 0.501<br>$\pm 0.002$  | 0.493<br>$\pm 0.038$ | 0.510<br>$\pm 0.025$  | 0.458<br>$\pm 0.013$  | 0.448<br>$\pm 0.056$  | 0.643<br>$\pm 0.021$        | 0.526<br>$\pm 0.025$ | 0.645<br>$\pm 0.048$        | 0.542<br>$\pm 0.029$ | 0.699<br>$\pm 0.040$        | 0.533<br>$\pm 0.032$  |
|                        | BAcc     | 0.281<br>$\pm 0.059$        | 0.248<br>$\pm 0.016$        | 0.264<br>$\pm 0.028$ | 0.276<br>$\pm 0.062$        | 0.160<br>$\pm 0.040$  | 0.112<br>$\pm 0.026$  | 0.214<br>$\pm 0.040$ | 0.181<br>$\pm 0.054$ | 0.140<br>$\pm 0.041$  | 0.143<br>$\pm 0.000$  | 0.162<br>$\pm 0.032$ | 0.145<br>$\pm 0.021$  | 0.133<br>$\pm 0.020$  | 0.110<br>$\pm 0.030$  | 0.286<br>$\pm 0.033$        | 0.179<br>$\pm 0.036$ | <b>0.302</b><br>$\pm 0.081$ | 0.193<br>$\pm 0.031$ | 0.343<br>$\pm 0.063$        | 0.188<br>$\pm 0.033$  |
|                        | Acc_1    | 0.283<br>$\pm 0.060$        | 0.248<br>$\pm 0.016$        | 0.264<br>$\pm 0.028$ | 0.276<br>$\pm 0.062$        | 0.160<br>$\pm 0.040$  | 0.112<br>$\pm 0.026$  | 0.214<br>$\pm 0.040$ | 0.181<br>$\pm 0.054$ | 0.140<br>$\pm 0.040$  | 0.143<br>$\pm 0.000$  | 0.162<br>$\pm 0.031$ | 0.147<br>$\pm 0.020$  | 0.128<br>$\pm 0.019$  | 0.110<br>$\pm 0.030$  | 0.286<br>$\pm 0.033$        | 0.179<br>$\pm 0.036$ | <b>0.297</b><br>$\pm 0.075$ | 0.195<br>$\pm 0.030$ | 0.333<br>$\pm 0.058$        | 0.185<br>$\pm 0.031$  |
|                        | Acc_2    | 0.474<br>$\pm 0.085$        | 0.462<br>$\pm 0.039$        | 0.462<br>$\pm 0.031$ | <b>0.479</b><br>$\pm 0.057$ | 0.300<br>$\pm 0.026$  | 0.217<br>$\pm 0.042$  | 0.402<br>$\pm 0.043$ | 0.333<br>$\pm 0.030$ | 0.270<br>$\pm 0.044$  | 0.286<br>$\pm 0.000$  | 0.273<br>$\pm 0.042$ | 0.300<br>$\pm 0.063$  | 0.263<br>$\pm 0.046$  | 0.221<br>$\pm 0.046$  | 0.448<br>$\pm 0.043$        | 0.319<br>$\pm 0.036$ | 0.470<br>$\pm 0.074$        | 0.361<br>$\pm 0.013$ | 0.531<br>$\pm 0.100$        | 0.307<br>$\pm 0.037$  |
|                        |          |                             |                             |                      |                             |                       |                       |                      |                      |                       |                       |                      |                       |                       |                       |                             |                      |                             |                      |                             |                       |
| sub13                  | $\kappa$ | 0.131<br>$\pm 0.076$        | 0.117<br>$\pm 0.050$        | 0.083<br>$\pm 0.039$ | 0.106<br>$\pm 0.083$        | 0.014<br>$\pm 0.059$  | -0.003<br>$\pm 0.036$ | 0.033<br>$\pm 0.052$ | 0.008<br>$\pm 0.039$ | -0.025<br>$\pm 0.036$ | -0.003<br>$\pm 0.006$ | 0.000<br>$\pm 0.066$ | 0.006<br>$\pm 0.032$  | 0.006<br>$\pm 0.016$  | -0.025<br>$\pm 0.018$ | <b>0.119</b><br>$\pm 0.058$ | 0.011<br>$\pm 0.057$ | 0.083<br>$\pm 0.049$        | 0.014<br>$\pm 0.047$ | 0.114<br>$\pm 0.036$        | 0.028<br>$\pm 0.026$  |
|                        | AUC      | 0.625<br>$\pm 0.035$        | 0.629<br>$\pm 0.025$        | 0.605<br>$\pm 0.021$ | 0.637<br>$\pm 0.029$        | 0.518<br>$\pm 0.035$  | 0.490<br>$\pm 0.040$  | 0.563<br>$\pm 0.049$ | 0.519<br>$\pm 0.037$ | 0.463<br>$\pm 0.045$  | 0.493<br>$\pm 0.016$  | 0.532<br>$\pm 0.035$ | 0.515<br>$\pm 0.035$  | 0.488<br>$\pm 0.031$  | 0.488<br>$\pm 0.045$  | 0.589<br>$\pm 0.042$        | 0.515<br>$\pm 0.055$ | 0.595<br>$\pm 0.032$        | 0.504<br>$\pm 0.041$ | <b>0.631</b><br>$\pm 0.015$ | 0.541<br>$\pm 0.039$  |
|                        | BAcc     | 0.255<br>$\pm 0.065$        | 0.243<br>$\pm 0.043$        | 0.214<br>$\pm 0.034$ | 0.233<br>$\pm 0.071$        | 0.155<br>$\pm 0.051$  | 0.140<br>$\pm 0.031$  | 0.171<br>$\pm 0.044$ | 0.150<br>$\pm 0.033$ | 0.121<br>$\pm 0.031$  | 0.140<br>$\pm 0.005$  | 0.143<br>$\pm 0.056$ | 0.148<br>$\pm 0.027$  | 0.148<br>$\pm 0.014$  | 0.121<br>$\pm 0.016$  | <b>0.245</b><br>$\pm 0.050$ | 0.152<br>$\pm 0.049$ | 0.214<br>$\pm 0.042$        | 0.155<br>$\pm 0.040$ | 0.240<br>$\pm 0.031$        | 0.167<br>$\pm 0.022$  |
|                        | Acc_1    | 0.252<br>$\pm 0.065$        | 0.243<br>$\pm 0.043$        | 0.214<br>$\pm 0.034$ | 0.233<br>$\pm 0.071$        | 0.158<br>$\pm 0.055$  | 0.142<br>$\pm 0.029$  | 0.171<br>$\pm 0.044$ | 0.150<br>$\pm 0.033$ | 0.122<br>$\pm 0.031$  | 0.140<br>$\pm 0.005$  | 0.152<br>$\pm 0.058$ | 0.140<br>$\pm 0.025$  | 0.145<br>$\pm 0.015$  | 0.121<br>$\pm 0.016$  | <b>0.245</b><br>$\pm 0.050$ | 0.152<br>$\pm 0.049$ | 0.212<br>$\pm 0.040$        | 0.152<br>$\pm 0.025$ | 0.239<br>$\pm 0.029$        | 0.166<br>$\pm 0.020$  |
|                        | Acc_2    | <b>0.431</b><br>$\pm 0.084$ | 0.412<br>$\pm 0.070$        | 0.396<br>$\pm 0.045$ | 0.407<br>$\pm 0.064$        | 0.319<br>$\pm 0.052$  | 0.272<br>$\pm 0.042$  | 0.333<br>$\pm 0.053$ | 0.333<br>$\pm 0.044$ | 0.240<br>$\pm 0.063$  | 0.283<br>$\pm 0.005$  | 0.331<br>$\pm 0.065$ | 0.301<br>$\pm 0.070$  | 0.270<br>$\pm 0.011$  | 0.271<br>$\pm 0.031$  | 0.417<br>$\pm 0.053$        | 0.279<br>$\pm 0.052$ | 0.393<br>$\pm 0.036$        | 0.266<br>$\pm 0.053$ | 0.474<br>$\pm 0.034$        | 0.351<br>$\pm 0.027$  |
|                        |          |                             |                             |                      |                             |                       |                       |                      |                      |                       |                       |                      |                       |                       |                       |                             |                      |                             |                      |                             |                       |
| sub14                  | $\kappa$ | 0.128<br>$\pm 0.036$        | <b>0.136</b><br>$\pm 0.037$ | 0.114<br>$\pm 0.033$ | <b>0.136</b><br>$\pm 0.040$ | -0.003<br>$\pm 0.045$ | -0.011<br>$\pm 0.023$ | 0.075<br>$\pm 0.047$ | 0.014<br>$\pm 0.049$ | -0.025<br>$\pm 0.021$ | 0.000<br>$\pm 0.000$  | 0.033<br>$\pm 0.033$ | -0.008<br>$\pm 0.033$ | -0.011<br>$\pm 0.025$ | -0.058<br>$\pm 0.023$ | 0.111<br>$\pm 0.034$        | 0.011<br>$\pm 0.025$ | 0.117<br>$\pm 0.068$        | 0.022<br>$\pm 0.063$ | 0.175<br>$\pm 0.060$        | 0.017<br>$\pm 0.057$  |
|                        | AUC      | 0.637<br>$\pm 0.026$        | 0.640<br>$\pm 0.022$        | 0.635<br>$\pm 0.032$ | <b>0.644</b><br>$\pm 0.025$ | 0.521<br>$\pm 0.031$  | 0.464<br>$\pm 0.040$  | 0.586<br>$\pm 0.039$ | 0.521<br>$\pm 0.034$ | 0.486<br>$\pm 0.016$  | 0.481<br>$\pm 0.037$  | 0.521<br>$\pm 0.054$ | 0.524<br>$\pm 0.035$  | 0.490<br>$\pm 0.025$  | 0.413<br>$\pm 0.030$  | 0.610<br>$\pm 0.039$        | 0.490<br>$\pm 0.030$ | 0.581<br>$\pm 0.063$        | 0.517<br>$\pm 0.023$ | 0.657<br>$\pm 0.029$        | 0.497<br>$\pm 0.049$  |
|                        | BAcc     | 0.252<br>$\pm 0.031$        | <b>0.260</b><br>$\pm 0.032$ | 0.240<br>$\pm 0.028$ | 0.260<br>$\pm 0.034$        | 0.140<br>$\pm 0.039$  | 0.133<br>$\pm 0.020$  | 0.207<br>$\pm 0.040$ | 0.155<br>$\pm 0.042$ | 0.121<br>$\pm 0.018$  | 0.143<br>$\pm 0.000$  | 0.171<br>$\pm 0.029$ | 0.136<br>$\pm 0.029$  | 0.133<br>$\pm 0.021$  | 0.093<br>$\pm 0.020$  | 0.238<br>$\pm 0.029$        | 0.152<br>$\pm 0.021$ | 0.243<br>$\pm 0.059$        | 0.162<br>$\pm 0.054$ | 0.293<br>$\pm 0.052$        | 0.157<br>$\pm 0.049$  |
|                        | Acc_1    | 0.252<br>$\pm 0.031$        | 0.257<br>$\pm 0.032$        | 0.240<br>$\pm 0.028$ | <b>0.260</b><br>$\pm 0.034$ | 0.140<br>$\pm 0.039$  | 0.133<br>$\pm 0.020$  | 0.207<br>$\pm 0.040$ | 0.155<br>$\pm 0.042$ | 0.121<br>$\pm 0.018$  | 0.143<br>$\pm 0.000$  | 0.176<br>$\pm 0.034$ | 0.131<br>$\pm 0.021$  | 0.140<br>$\pm 0.021$  | 0.090<br>$\pm 0.016$  | 0.238<br>$\pm 0.029$        | 0.152<br>$\pm 0.021$ | 0.246<br>$\pm 0.060$        | 0.159<br>$\pm 0.054$ | 0.300<br>$\pm 0.045$        | 0.158<br>$\pm 0.048$  |
|                        | Acc_2    | 0.440<br>$\pm 0.045$        | 0.440<br>$\pm 0.044$        | 0.421<br>$\pm 0.040$ | <b>0.476</b><br>$\pm 0.039$ | 0.307<br>$\pm 0.038$  | 0.262<br>$\pm 0.037$  | 0.390<br>$\pm 0.058$ | 0.302<br>$\pm 0.076$ | 0.269<br>$\pm 0.029$  | 0.281<br>$\pm 0.011$  | 0.328<br>$\pm 0.077$ | 0.277<br>$\pm 0.057$  | 0.274<br>$\pm 0.034$  | 0.195<br>$\pm 0.038$  | 0.402<br>$\pm 0.042$        | 0.279<br>$\pm 0.043$ | 0.396<br>$\pm 0.082$        | 0.309<br>$\pm 0.039$ | 0.510<br>$\pm 0.033$        | 0.281<br>$\pm 0.020$  |
|                        |          |                             |                             |                      |                             |                       |                       |                      |                      |                       |                       |                      |                       |                       |                       |                             |                      |                             |                      |                             |                       |
| sub15                  | $\kappa$ | 0.169<br>$\pm 0.027$        | 0.142<br>$\pm 0.058$        | 0.139<br>$\pm 0.035$ | 0.144<br>$\pm 0.049$        | 0.039<br>$\pm 0.028$  | -0.025<br>$\pm 0.039$ | 0.067<br>$\pm 0.032$ | 0.028<br>$\pm 0.062$ | 0.017<br>$\pm 0.058$  | 0.000<br>$\pm 0.000$  | 0.050<br>$\pm 0.052$ | -0.006<br>$\pm 0.038$ | -0.003<br>$\pm 0.006$ | -0.014<br>$\pm 0.042$ | 0.172<br>$\pm 0.053$        | 0.019<br>$\pm 0.025$ | <b>0.192</b><br>$\pm 0.048$ | 0.067<br>$\pm 0.045$ | 0.231<br>$\pm 0.045$        | -0.008<br>$\pm 0.042$ |
| Continued on next page |          |                             |                             |                      |                             |                       |                       |                      |                      |                       |                       |                      |                       |                       |                       |                             |                      |                             |                      |                             |                       |

Continued on next page

| SubjectMetric |          | DeepConvnet                 | EEGNet               | Conformer            | CTNet                       | BIOT (f)              | BIOT (l)              | BENDR (f)            | BENDR (l)             | CBraMod (f)           | CBraMod (l)          | EEGPT (f)            | EEGPT (l)             | LaBraM (f)            | LaBraM (l)            | STEEGformer-s (f)           | STEEGformer-s (l)     | STEEGformer-b (f)           | STEEGformer-b (l)    | STEEGformer-h (f)    | STEEGformer-h (l)    |
|---------------|----------|-----------------------------|----------------------|----------------------|-----------------------------|-----------------------|-----------------------|----------------------|-----------------------|-----------------------|----------------------|----------------------|-----------------------|-----------------------|-----------------------|-----------------------------|-----------------------|-----------------------------|----------------------|----------------------|----------------------|
|               | AUC      | <b>0.674</b><br>$\pm 0.013$ | 0.635<br>$\pm 0.013$ | 0.624<br>$\pm 0.034$ | 0.645<br>$\pm 0.037$        | 0.519<br>$\pm 0.022$  | 0.489<br>$\pm 0.024$  | 0.567<br>$\pm 0.035$ | 0.547<br>$\pm 0.043$  | 0.502<br>$\pm 0.049$  | 0.493<br>$\pm 0.016$ | 0.526<br>$\pm 0.015$ | 0.513<br>$\pm 0.044$  | 0.472<br>$\pm 0.034$  | 0.481<br>$\pm 0.047$  | 0.619<br>$\pm 0.010$        | 0.537<br>$\pm 0.036$  | 0.663<br>$\pm 0.040$        | 0.538<br>$\pm 0.041$ | 0.695<br>$\pm 0.024$ | 0.539<br>$\pm 0.039$ |
|               | BAcc     | 0.288<br>$\pm 0.023$        | 0.264<br>$\pm 0.049$ | 0.262<br>$\pm 0.030$ | 0.267<br>$\pm 0.042$        | 0.176<br>$\pm 0.024$  | 0.121<br>$\pm 0.033$  | 0.200<br>$\pm 0.027$ | 0.167<br>$\pm 0.053$  | 0.157<br>$\pm 0.050$  | 0.143<br>$\pm 0.000$ | 0.186<br>$\pm 0.044$ | 0.138<br>$\pm 0.032$  | 0.140<br>$\pm 0.005$  | 0.131<br>$\pm 0.036$  | 0.290<br>$\pm 0.046$        | 0.160<br>$\pm 0.022$  | <b>0.307</b><br>$\pm 0.041$ | 0.200<br>$\pm 0.039$ | 0.340<br>$\pm 0.038$ | 0.136<br>$\pm 0.036$ |
|               | Acc.1    | 0.288<br>$\pm 0.023$        | 0.264<br>$\pm 0.049$ | 0.262<br>$\pm 0.030$ | 0.267<br>$\pm 0.042$        | 0.176<br>$\pm 0.024$  | 0.121<br>$\pm 0.033$  | 0.200<br>$\pm 0.027$ | 0.167<br>$\pm 0.053$  | 0.157<br>$\pm 0.050$  | 0.143<br>$\pm 0.000$ | 0.186<br>$\pm 0.048$ | 0.136<br>$\pm 0.032$  | 0.131<br>$\pm 0.017$  | 0.131<br>$\pm 0.036$  | 0.290<br>$\pm 0.046$        | 0.162<br>$\pm 0.025$  | <b>0.315</b><br>$\pm 0.037$ | 0.203<br>$\pm 0.046$ | 0.347<br>$\pm 0.045$ | 0.131<br>$\pm 0.031$ |
|               | Acc.2    | 0.483<br>$\pm 0.025$        | 0.426<br>$\pm 0.021$ | 0.440<br>$\pm 0.053$ | 0.419<br>$\pm 0.060$        | 0.312<br>$\pm 0.037$  | 0.252<br>$\pm 0.028$  | 0.364<br>$\pm 0.078$ | 0.329<br>$\pm 0.045$  | 0.324<br>$\pm 0.071$  | 0.286<br>$\pm 0.000$ | 0.331<br>$\pm 0.039$ | 0.300<br>$\pm 0.062$  | 0.274<br>$\pm 0.027$  | 0.252<br>$\pm 0.036$  | 0.448<br>$\pm 0.014$        | 0.345<br>$\pm 0.056$  | <b>0.497</b><br>$\pm 0.064$ | 0.345<br>$\pm 0.055$ | 0.527<br>$\pm 0.026$ | 0.314<br>$\pm 0.080$ |
|               | $\kappa$ | 0.175<br>$\pm 0.059$        | 0.156<br>$\pm 0.045$ | 0.158<br>$\pm 0.046$ | <b>0.183</b><br>$\pm 0.036$ | 0.014<br>$\pm 0.028$  | -0.025<br>$\pm 0.018$ | 0.072<br>$\pm 0.058$ | 0.047<br>$\pm 0.061$  | 0.003<br>$\pm 0.015$  | 0.000<br>$\pm 0.000$ | 0.008<br>$\pm 0.045$ | -0.003<br>$\pm 0.018$ | 0.006<br>$\pm 0.012$  | -0.014<br>$\pm 0.033$ | 0.183<br>$\pm 0.056$        | -0.003<br>$\pm 0.018$ | 0.164<br>$\pm 0.102$        | 0.017<br>$\pm 0.064$ | 0.228<br>$\pm 0.067$ | 0.003<br>$\pm 0.033$ |
|               | AUC      | <b>0.666</b><br>$\pm 0.024$ | 0.653<br>$\pm 0.038$ | 0.662<br>$\pm 0.026$ | 0.660<br>$\pm 0.019$        | 0.496<br>$\pm 0.039$  | 0.478<br>$\pm 0.015$  | 0.571<br>$\pm 0.073$ | 0.532<br>$\pm 0.021$  | 0.496<br>$\pm 0.013$  | 0.500<br>$\pm 0.001$ | 0.497<br>$\pm 0.038$ | 0.501<br>$\pm 0.011$  | 0.505<br>$\pm 0.007$  | 0.468<br>$\pm 0.023$  | 0.660<br>$\pm 0.026$        | 0.518<br>$\pm 0.027$  | 0.657<br>$\pm 0.055$        | 0.521<br>$\pm 0.031$ | 0.705<br>$\pm 0.044$ | 0.530<br>$\pm 0.029$ |
|               | BAcc     | 0.293<br>$\pm 0.051$        | 0.276<br>$\pm 0.039$ | 0.279<br>$\pm 0.039$ | <b>0.300</b><br>$\pm 0.031$ | 0.155<br>$\pm 0.024$  | 0.121<br>$\pm 0.016$  | 0.205<br>$\pm 0.050$ | 0.183<br>$\pm 0.052$  | 0.145<br>$\pm 0.013$  | 0.143<br>$\pm 0.000$ | 0.150<br>$\pm 0.038$ | 0.140<br>$\pm 0.016$  | 0.148<br>$\pm 0.011$  | 0.131<br>$\pm 0.028$  | <b>0.300</b><br>$\pm 0.048$ | 0.140<br>$\pm 0.016$  | 0.283<br>$\pm 0.088$        | 0.157<br>$\pm 0.055$ | 0.338<br>$\pm 0.057$ | 0.145<br>$\pm 0.028$ |
|               | Acc.1    | 0.293<br>$\pm 0.051$        | 0.276<br>$\pm 0.039$ | 0.279<br>$\pm 0.039$ | <b>0.300</b><br>$\pm 0.031$ | 0.155<br>$\pm 0.024$  | 0.121<br>$\pm 0.016$  | 0.205<br>$\pm 0.050$ | 0.183<br>$\pm 0.052$  | 0.145<br>$\pm 0.013$  | 0.143<br>$\pm 0.000$ | 0.155<br>$\pm 0.035$ | 0.143<br>$\pm 0.019$  | 0.143<br>$\pm 0.000$  | 0.129<br>$\pm 0.028$  | <b>0.300</b><br>$\pm 0.048$ | 0.145<br>$\pm 0.023$  | 0.285<br>$\pm 0.086$        | 0.156<br>$\pm 0.054$ | 0.340<br>$\pm 0.057$ | 0.150<br>$\pm 0.022$ |
|               | Acc.2    | 0.486<br>$\pm 0.030$        | 0.471<br>$\pm 0.057$ | 0.479<br>$\pm 0.064$ | 0.467<br>$\pm 0.035$        | 0.283<br>$\pm 0.040$  | 0.245<br>$\pm 0.022$  | 0.381<br>$\pm 0.082$ | 0.352<br>$\pm 0.062$  | 0.283<br>$\pm 0.005$  | 0.286<br>$\pm 0.000$ | 0.315<br>$\pm 0.019$ | 0.275<br>$\pm 0.039$  | 0.288<br>$\pm 0.005$  | 0.260<br>$\pm 0.018$  | <b>0.493</b><br>$\pm 0.039$ | 0.293<br>$\pm 0.034$  | 0.470<br>$\pm 0.053$        | 0.333<br>$\pm 0.052$ | 0.546<br>$\pm 0.054$ | 0.328<br>$\pm 0.030$ |
| sub2          | $\kappa$ | 0.133<br>$\pm 0.035$        | 0.089<br>$\pm 0.053$ | 0.069<br>$\pm 0.047$ | 0.122<br>$\pm 0.035$        | -0.017<br>$\pm 0.043$ | 0.003<br>$\pm 0.032$  | 0.006<br>$\pm 0.049$ | 0.019<br>$\pm 0.075$  | -0.006<br>$\pm 0.040$ | 0.000<br>$\pm 0.000$ | 0.006<br>$\pm 0.047$ | -0.033<br>$\pm 0.053$ | -0.008<br>$\pm 0.019$ | -0.053<br>$\pm 0.036$ | <b>0.175</b><br>$\pm 0.068$ | 0.019<br>$\pm 0.064$  | 0.114<br>$\pm 0.055$        | 0.031<br>$\pm 0.043$ | 0.244<br>$\pm 0.063$ | 0.011<br>$\pm 0.023$ |
|               | AUC      | <b>0.648</b><br>$\pm 0.031$ | 0.604<br>$\pm 0.020$ | 0.591<br>$\pm 0.032$ | 0.628<br>$\pm 0.016$        | 0.490<br>$\pm 0.031$  | 0.464<br>$\pm 0.036$  | 0.510<br>$\pm 0.031$ | 0.520<br>$\pm 0.037$  | 0.491<br>$\pm 0.040$  | 0.506<br>$\pm 0.008$ | 0.511<br>$\pm 0.028$ | 0.490<br>$\pm 0.030$  | 0.473<br>$\pm 0.050$  | 0.434<br>$\pm 0.031$  | 0.643<br>$\pm 0.029$        | 0.506<br>$\pm 0.050$  | 0.637<br>$\pm 0.033$        | 0.508<br>$\pm 0.057$ | 0.712<br>$\pm 0.026$ | 0.521<br>$\pm 0.029$ |
|               | BAcc     | 0.257<br>$\pm 0.030$        | 0.219<br>$\pm 0.045$ | 0.202<br>$\pm 0.040$ | 0.248<br>$\pm 0.030$        | 0.129<br>$\pm 0.037$  | 0.145<br>$\pm 0.027$  | 0.148<br>$\pm 0.042$ | 0.160<br>$\pm 0.064$  | 0.138<br>$\pm 0.034$  | 0.143<br>$\pm 0.000$ | 0.148<br>$\pm 0.040$ | 0.114<br>$\pm 0.046$  | 0.136<br>$\pm 0.016$  | 0.098<br>$\pm 0.031$  | <b>0.293</b><br>$\pm 0.058$ | 0.160<br>$\pm 0.055$  | 0.240<br>$\pm 0.047$        | 0.169<br>$\pm 0.037$ | 0.352<br>$\pm 0.054$ | 0.152<br>$\pm 0.020$ |
|               | Acc.1    | 0.260<br>$\pm 0.027$        | 0.219<br>$\pm 0.045$ | 0.202<br>$\pm 0.040$ | 0.248<br>$\pm 0.030$        | 0.134<br>$\pm 0.042$  | 0.150<br>$\pm 0.029$  | 0.148<br>$\pm 0.042$ | 0.160<br>$\pm 0.064$  | 0.140<br>$\pm 0.041$  | 0.143<br>$\pm 0.000$ | 0.150<br>$\pm 0.035$ | 0.115<br>$\pm 0.049$  | 0.136<br>$\pm 0.018$  | 0.098<br>$\pm 0.031$  | <b>0.293</b><br>$\pm 0.058$ | 0.162<br>$\pm 0.052$  | 0.239<br>$\pm 0.046$        | 0.175<br>$\pm 0.040$ | 0.350<br>$\pm 0.063$ | 0.157<br>$\pm 0.017$ |
|               | Acc.2    | 0.448<br>$\pm 0.034$        | 0.395<br>$\pm 0.053$ | 0.386<br>$\pm 0.067$ | 0.448<br>$\pm 0.045$        | 0.288<br>$\pm 0.066$  | 0.270<br>$\pm 0.030$  | 0.252<br>$\pm 0.061$ | 0.298<br>$\pm 0.048$  | 0.261<br>$\pm 0.084$  | 0.286<br>$\pm 0.000$ | 0.313<br>$\pm 0.061$ | 0.268<br>$\pm 0.047$  | 0.253<br>$\pm 0.045$  | 0.221<br>$\pm 0.052$  | <b>0.476</b><br>$\pm 0.051$ | 0.281<br>$\pm 0.043$  | 0.457<br>$\pm 0.071$        | 0.306<br>$\pm 0.036$ | 0.555<br>$\pm 0.056$ | 0.330<br>$\pm 0.030$ |
|               | $\kappa$ | 0.186<br>$\pm 0.047$        | 0.214<br>$\pm 0.023$ | 0.178<br>$\pm 0.058$ | 0.214<br>$\pm 0.050$        | 0.011<br>$\pm 0.050$  | -0.017<br>$\pm 0.023$ | 0.100<br>$\pm 0.037$ | -0.042<br>$\pm 0.042$ | 0.011<br>$\pm 0.039$  | 0.000<br>$\pm 0.000$ | 0.047<br>$\pm 0.038$ | 0.028<br>$\pm 0.049$  | 0.008<br>$\pm 0.008$  | -0.039<br>$\pm 0.028$ | 0.194<br>$\pm 0.037$        | 0.028<br>$\pm 0.053$  | <b>0.222</b><br>$\pm 0.063$ | 0.078<br>$\pm 0.036$ | 0.231<br>$\pm 0.065$ | 0.069<br>$\pm 0.035$ |
| sub4          | AUC      | 0.670<br>$\pm 0.025$        | 0.691<br>$\pm 0.016$ | 0.662<br>$\pm 0.036$ | <b>0.671</b><br>$\pm 0.017$ | 0.517<br>$\pm 0.020$  | 0.491<br>$\pm 0.045$  | 0.618<br>$\pm 0.009$ | 0.518<br>$\pm 0.042$  | 0.520<br>$\pm 0.040$  | 0.505<br>$\pm 0.021$ | 0.533<br>$\pm 0.035$ | 0.542<br>$\pm 0.021$  | 0.473<br>$\pm 0.016$  | 0.474<br>$\pm 0.049$  | 0.647<br>$\pm 0.032$        | 0.518<br>$\pm 0.032$  | 0.662<br>$\pm 0.048$        | 0.553<br>$\pm 0.025$ | 0.665<br>$\pm 0.049$ | 0.548<br>$\pm 0.017$ |

Continued on next page

| SubjectMetric |       | DeepConvnet                    | EEGNet          | Conformer       | CTNet                          | BIOT (f)         | BIOT (l)         | BENDR (f)       | BENDR (l)        | CBraMod (f)      | CBraMod (l)     | EEGPT (f)       | EEGPT (l)        | LaBraM (f)       | LaBraM (l)       | STEEGformer-s (f)              | STEEGformer-s (l) | STEEGformer-b (f)              | STEEGformer-b (l) | STEEGformer-l (f)              | STEEGformer-l (l) |
|---------------|-------|--------------------------------|-----------------|-----------------|--------------------------------|------------------|------------------|-----------------|------------------|------------------|-----------------|-----------------|------------------|------------------|------------------|--------------------------------|-------------------|--------------------------------|-------------------|--------------------------------|-------------------|
|               | BAcc  | 0.302<br>±0.040                | 0.326<br>±0.020 | 0.295<br>±0.049 | 0.326<br>±0.043                | 0.152<br>±0.043  | 0.129<br>±0.020  | 0.229<br>±0.032 | 0.107<br>±0.036  | 0.152<br>±0.033  | 0.143<br>±0.000 | 0.183<br>±0.032 | 0.167<br>±0.042  | 0.150<br>±0.007  | 0.110<br>±0.024  | 0.310<br>±0.031                | 0.167<br>±0.045   | <b>0.333</b><br>± <b>0.054</b> | 0.210<br>±0.031   | 0.340<br>± 0.056               | 0.202<br>±0.030   |
|               | Acc_1 | 0.302<br>±0.040                | 0.326<br>±0.020 | 0.295<br>±0.049 | 0.326<br>±0.043                | 0.152<br>±0.043  | 0.129<br>±0.020  | 0.229<br>±0.032 | 0.107<br>±0.036  | 0.152<br>±0.033  | 0.143<br>±0.000 | 0.183<br>±0.031 | 0.165<br>±0.045  | 0.143<br>±0.015  | 0.110<br>±0.024  | 0.310<br>±0.031                | 0.167<br>±0.045   | <b>0.336</b><br>± <b>0.050</b> | 0.213<br>±0.033   | 0.342<br>± 0.064               | 0.201<br>±0.031   |
|               | Acc_2 | 0.443<br>±0.057                | 0.505<br>±0.027 | 0.474<br>±0.061 | 0.510<br>± 0.039               | 0.312<br>±0.026  | 0.281<br>±0.052  | 0.398<br>±0.014 | 0.283<br>±0.070  | 0.298<br>±0.064  | 0.283<br>±0.005 | 0.346<br>±0.026 | 0.341<br>±0.066  | 0.276<br>±0.010  | 0.267<br>±0.077  | 0.476<br>±0.044                | 0.305<br>±0.059   | 0.465<br>±0.060                | 0.350<br>±0.057   | <b>0.507</b><br>± <b>0.090</b> | 0.331<br>±0.027   |
|               | κ     | 0.111<br>±0.037                | 0.092<br>±0.097 | 0.083<br>±0.060 | 0.142<br>±0.032                | -0.006<br>±0.039 | 0.031<br>±0.045  | 0.031<br>±0.046 | 0.017<br>±0.065  | -0.006<br>±0.053 | 0.000<br>±0.000 | 0.006<br>±0.053 | -0.022<br>±0.032 | 0.000<br>±0.000  | -0.025<br>±0.041 | 0.236<br>± 0.088               | 0.039<br>±0.042   | 0.208<br>±0.054                | 0.067<br>±0.064   | <b>0.222</b><br>± <b>0.063</b> | 0.058<br>±0.070   |
| sub5          | AUC   | 0.657<br>±0.019                | 0.624<br>±0.042 | 0.611<br>±0.035 | 0.630<br>±0.003                | 0.495<br>±0.040  | 0.507<br>±0.039  | 0.534<br>±0.008 | 0.521<br>±0.042  | 0.492<br>±0.025  | 0.506<br>±0.014 | 0.522<br>±0.042 | 0.502<br>±0.033  | 0.493<br>±0.010  | 0.453<br>±0.015  | 0.666<br>±0.040                | 0.531<br>±0.044   | <b>0.671</b><br>± <b>0.051</b> | 0.567<br>±0.048   | 0.716<br>± 0.024               | 0.568<br>±0.062   |
|               | BAcc  | 0.238<br>±0.031                | 0.221<br>±0.083 | 0.214<br>±0.051 | 0.264<br>±0.027                | 0.138<br>±0.033  | 0.169<br>±0.039  | 0.169<br>±0.040 | 0.157<br>±0.055  | 0.138<br>±0.046  | 0.143<br>±0.000 | 0.148<br>±0.045 | 0.124<br>±0.027  | 0.143<br>±0.000  | 0.121<br>±0.035  | 0.345<br>± 0.075               | 0.176<br>±0.036   | 0.321<br>±0.046                | 0.200<br>±0.055   | <b>0.333</b><br>± <b>0.054</b> | 0.193<br>±0.060   |
|               | Acc_1 | 0.238<br>±0.031                | 0.221<br>±0.083 | 0.214<br>±0.051 | 0.264<br>±0.027                | 0.136<br>±0.035  | 0.167<br>±0.047  | 0.169<br>±0.040 | 0.157<br>±0.055  | 0.142<br>±0.048  | 0.143<br>±0.000 | 0.147<br>±0.048 | 0.125<br>±0.026  | 0.145<br>±0.010  | 0.119<br>±0.035  | 0.345<br>± 0.075               | 0.176<br>±0.036   | <b>0.329</b><br>± <b>0.045</b> | 0.199<br>±0.062   | 0.328<br>±0.055                | 0.196<br>±0.055   |
|               | Acc_2 | 0.436<br>±0.043                | 0.402<br>±0.047 | 0.402<br>±0.065 | 0.450<br>±0.030                | 0.276<br>±0.043  | 0.294<br>±0.056  | 0.319<br>±0.016 | 0.302<br>±0.032  | 0.268<br>±0.061  | 0.286<br>±0.000 | 0.319<br>±0.050 | 0.292<br>±0.066  | 0.287<br>±0.010  | 0.240<br>±0.031  | <b>0.517</b><br>± <b>0.088</b> | 0.298<br>±0.056   | 0.498<br>±0.061                | 0.360<br>±0.063   | 0.564<br>± 0.051               | 0.366<br>±0.063   |
| sub6          | κ     | <b>0.239</b><br>± <b>0.081</b> | 0.158<br>±0.008 | 0.156<br>±0.066 | 0.206<br>±0.041                | 0.025<br>±0.033  | -0.014<br>±0.029 | 0.064<br>±0.025 | 0.022<br>±0.068  | 0.008<br>±0.019  | 0.000<br>±0.000 | 0.008<br>±0.030 | 0.008<br>±0.032  | 0.000<br>±0.000  | -0.019<br>±0.008 | 0.189<br>±0.040                | 0.003<br>±0.054   | 0.222<br>±0.064                | 0.031<br>±0.058   | 0.244<br>± 0.068               | 0.006<br>±0.040   |
|               | AUC   | 0.706<br>± 0.014               | 0.669<br>±0.017 | 0.652<br>±0.037 | <b>0.686</b><br>± <b>0.026</b> | 0.528<br>±0.046  | 0.462<br>±0.061  | 0.570<br>±0.017 | 0.521<br>±0.050  | 0.511<br>±0.026  | 0.500<br>±0.000 | 0.536<br>±0.038 | 0.528<br>±0.020  | 0.500<br>±0.000  | 0.498<br>±0.029  | 0.641<br>±0.018                | 0.521<br>±0.055   | 0.683<br>±0.041                | 0.532<br>±0.039   | 0.667<br>±0.019                | 0.531<br>±0.025   |
|               | BAcc  | <b>0.348</b><br>± <b>0.069</b> | 0.279<br>±0.007 | 0.276<br>±0.057 | 0.319<br>±0.035                | 0.164<br>±0.028  | 0.131<br>±0.025  | 0.198<br>±0.022 | 0.162<br>±0.059  | 0.150<br>±0.016  | 0.143<br>±0.000 | 0.150<br>±0.026 | 0.150<br>±0.027  | 0.143<br>±0.000  | 0.126<br>±0.007  | 0.305<br>±0.034                | 0.145<br>±0.046   | 0.333<br>±0.055                | 0.169<br>±0.050   | 0.352<br>± 0.058               | 0.148<br>±0.034   |
|               | Acc_1 | <b>0.348</b><br>± <b>0.069</b> | 0.279<br>±0.007 | 0.279<br>±0.057 | 0.319<br>±0.035                | 0.164<br>±0.028  | 0.131<br>±0.025  | 0.195<br>±0.026 | 0.162<br>±0.059  | 0.150<br>±0.016  | 0.143<br>±0.000 | 0.147<br>±0.027 | 0.149<br>±0.030  | 0.143<br>±0.000  | 0.126<br>±0.007  | 0.305<br>±0.034                | 0.145<br>±0.046   | 0.340<br>±0.055                | 0.167<br>±0.051   | 0.356<br>± 0.067               | 0.148<br>±0.033   |
| sub7          | Acc_2 | 0.540<br>± 0.033               | 0.479<br>±0.037 | 0.474<br>±0.057 | 0.500<br>±0.033                | 0.305<br>±0.069  | 0.248<br>±0.028  | 0.362<br>±0.040 | 0.317<br>±0.068  | 0.290<br>±0.011  | 0.286<br>±0.000 | 0.295<br>±0.027 | 0.310<br>±0.047  | 0.286<br>±0.000  | 0.252<br>±0.020  | 0.481<br>±0.026                | 0.312<br>±0.075   | <b>0.520</b><br>± <b>0.067</b> | 0.321<br>±0.057   | 0.517<br>±0.039                | 0.317<br>±0.035   |
|               | κ     | 0.094<br>±0.039                | 0.114<br>±0.043 | 0.106<br>±0.063 | 0.114<br>±0.049                | 0.014<br>±0.075  | -0.025<br>±0.035 | 0.092<br>±0.051 | -0.017<br>±0.032 | -0.039<br>±0.048 | 0.000<br>±0.000 | 0.011<br>±0.027 | -0.003<br>±0.045 | -0.019<br>±0.019 | -0.039<br>±0.039 | <b>0.117</b><br>± <b>0.047</b> | 0.031<br>±0.045   | 0.142<br>± 0.077               | 0.078<br>±0.041   | 0.142<br>± 0.073               | 0.031<br>±0.058   |
|               | AUC   | 0.609<br>±0.017                | 0.609<br>±0.037 | 0.601<br>±0.024 | <b>0.628</b><br>± <b>0.022</b> | 0.513<br>±0.042  | 0.485<br>±0.022  | 0.589<br>±0.037 | 0.491<br>±0.018  | 0.474<br>±0.032  | 0.499<br>±0.017 | 0.519<br>±0.029 | 0.515<br>±0.036  | 0.464<br>±0.027  | 0.456<br>±0.026  | 0.598<br>±0.039                | 0.521<br>±0.043   | 0.612<br>±0.036                | 0.543<br>±0.047   | 0.634<br>± 0.041               | 0.537<br>±0.046   |
|               | BAcc  | 0.224<br>±0.033                | 0.240<br>±0.037 | 0.233<br>±0.054 | 0.240<br>±0.042                | 0.155<br>±0.065  | 0.121<br>±0.030  | 0.221<br>±0.043 | 0.129<br>±0.027  | 0.110<br>±0.041  | 0.143<br>±0.000 | 0.152<br>±0.023 | 0.140<br>±0.039  | 0.126<br>±0.016  | 0.110<br>±0.033  | 0.243<br>±0.040                | 0.169<br>±0.039   | 0.243<br>± 0.066               | 0.210<br>±0.035   | <b>0.264</b><br>± <b>0.063</b> | 0.169<br>±0.049   |

Continued on next page

| SubjectMetric |          | DeepConvnet                    | EEGNet          | Conformer                      | CTNet                          | BIOT (f)        | BIOT (l)         | BENDR (f)       | BENDR (l)        | CBraMod (f)      | CBraMod (l)     | EEGPT (f)       | EEGPT (l)       | LaBraM (f)      | LaBraM (l)       | STEEGformer-s (f) | STEEGformer-s (l) | STEEGformer-b (f)              | STEEGformer-b (l) | STEEGformer-l (f)              | STEEGformer-l (l) |
|---------------|----------|--------------------------------|-----------------|--------------------------------|--------------------------------|-----------------|------------------|-----------------|------------------|------------------|-----------------|-----------------|-----------------|-----------------|------------------|-------------------|-------------------|--------------------------------|-------------------|--------------------------------|-------------------|
|               | Acc.1    | 0.221<br>±0.036                | 0.240<br>±0.037 | 0.233<br>±0.054                | 0.240<br>±0.042                | 0.155<br>±0.065 | 0.121<br>±0.030  | 0.221<br>±0.043 | 0.131<br>±0.028  | 0.110<br>±0.041  | 0.143<br>±0.000 | 0.151<br>±0.025 | 0.139<br>±0.042 | 0.126<br>±0.016 | 0.112<br>±0.032  | 0.243<br>±0.040   | 0.167<br>±0.035   | <b>0.259</b><br>± <b>0.063</b> | 0.215<br>±0.034   | <div>0.267<br/>± 0.057</div>   | 0.168<br>±0.055   |
|               | Acc.2    | 0.405<br>±0.030                | 0.426<br>±0.066 | 0.417<br>±0.050                | 0.438<br>±0.035                | 0.300<br>±0.057 | 0.267<br>±0.051  | 0.393<br>±0.048 | 0.307<br>±0.045  | 0.255<br>±0.045  | 0.286<br>±0.000 | 0.312<br>±0.051 | 0.288<br>±0.059 | 0.274<br>±0.029 | 0.226<br>±0.035  | 0.398<br>±0.047   | 0.300<br>±0.066   | <b>0.446</b><br>± <b>0.054</b> | 0.326<br>±0.056   | <div>0.461<br/>± 0.072</div>   | 0.326<br>±0.048   |
|               | $\kappa$ | <b>0.239</b><br>± <b>0.081</b> | 0.194<br>±0.075 | 0.164<br>±0.064                | 0.225<br>±0.069                | 0.064<br>±0.068 | -0.011<br>±0.018 | 0.131<br>±0.075 | -0.017<br>±0.039 | -0.019<br>±0.021 | 0.000<br>±0.000 | 0.019<br>±0.067 | 0.067<br>±0.046 | 0.000<br>±0.000 | -0.019<br>±0.023 | 0.167<br>±0.064   | 0.006<br>±0.038   | 0.181<br>±0.044                | 0.056<br>±0.014   | <div>0.272<br/>± 0.074</div>   | 0.056<br>±0.033   |
| sub8          | AUC      | 0.696<br>±0.042                | 0.708<br>±0.043 | 0.662<br>±0.010                | <div>0.722<br/>± 0.018</div>   | 0.540<br>±0.075 | 0.536<br>±0.042  | 0.616<br>±0.066 | 0.494<br>±0.022  | 0.489<br>±0.023  | 0.500<br>±0.000 | 0.534<br>±0.050 | 0.564<br>±0.040 | 0.501<br>±0.001 | 0.459<br>±0.019  | 0.642<br>±0.066   | 0.519<br>±0.024   | 0.674<br>±0.023                | 0.561<br>±0.034   | <b>0.719</b><br>± <b>0.046</b> | 0.573<br>±0.041   |
|               | BAcc     | <b>0.348</b><br>± <b>0.070</b> | 0.310<br>±0.064 | 0.283<br>±0.055                | 0.336<br>±0.059                | 0.198<br>±0.059 | 0.133<br>±0.016  | 0.255<br>±0.064 | 0.129<br>±0.033  | 0.126<br>±0.018  | 0.143<br>±0.000 | 0.160<br>±0.057 | 0.200<br>±0.040 | 0.143<br>±0.000 | 0.126<br>±0.020  | 0.286<br>±0.055   | 0.148<br>±0.032   | 0.298<br>±0.038                | 0.190<br>±0.012   | <div>0.376<br/>± 0.063</div>   | 0.190<br>±0.028   |
|               | Acc.1    | <b>0.348</b><br>± <b>0.070</b> | 0.310<br>±0.064 | 0.283<br>±0.055                | 0.336<br>±0.059                | 0.198<br>±0.059 | 0.133<br>±0.016  | 0.255<br>±0.064 | 0.129<br>±0.033  | 0.126<br>±0.018  | 0.143<br>±0.000 | 0.160<br>±0.063 | 0.214<br>±0.034 | 0.143<br>±0.000 | 0.124<br>±0.023  | 0.286<br>±0.055   | 0.145<br>±0.031   | 0.298<br>±0.038                | 0.192<br>±0.016   | <div>0.381<br/>± 0.070</div>   | 0.188<br>±0.029   |
|               | Acc.2    | 0.486<br>±0.065                | 0.498<br>±0.046 | 0.467<br>±0.031                | <b>0.531</b><br>± <b>0.061</b> | 0.336<br>±0.062 | 0.286<br>±0.000  | 0.405<br>±0.101 | 0.283<br>±0.018  | 0.260<br>±0.036  | 0.286<br>±0.000 | 0.334<br>±0.093 | 0.374<br>±0.064 | 0.286<br>±0.000 | 0.286<br>±0.008  | 0.445<br>±0.089   | 0.317<br>±0.018   | 0.527<br>±0.077                | 0.336<br>±0.032   | <div>0.602<br/>± 0.077</div>   | 0.351<br>±0.044   |
|               | $\kappa$ | 0.114<br>±0.042                | 0.122<br>±0.066 | <b>0.125</b><br>± <b>0.039</b> | 0.117<br>±0.052                | 0.036<br>±0.043 | -0.042<br>±0.028 | 0.075<br>±0.071 | -0.017<br>±0.027 | -0.019<br>±0.066 | 0.000<br>±0.000 | 0.017<br>±0.036 | 0.008<br>±0.053 | 0.000<br>±0.000 | -0.050<br>±0.021 | 0.119<br>±0.047   | 0.003<br>±0.030   | 0.092<br>±0.063                | -0.017<br>±0.033  | <div>0.169<br/>± 0.035</div>   | 0.008<br>±0.016   |
|               | AUC      | 0.617<br>±0.046                | 0.638<br>±0.048 | 0.615<br>±0.038                | <b>0.647</b><br>± <b>0.038</b> | 0.513<br>±0.015 | 0.474<br>±0.017  | 0.570<br>±0.036 | 0.498<br>±0.032  | 0.470<br>±0.060  | 0.494<br>±0.013 | 0.541<br>±0.060 | 0.487<br>±0.025 | 0.473<br>±0.026 | 0.432<br>±0.039  | 0.599<br>±0.030   | 0.469<br>±0.022   | 0.605<br>±0.025                | 0.469<br>±0.022   | <div>0.660<br/>± 0.031</div>   | 0.490<br>±0.052   |
| sub9          | BAcc     | 0.240<br>±0.036                | 0.248<br>±0.057 | <b>0.250</b><br>± <b>0.034</b> | 0.243<br>±0.044                | 0.174<br>±0.037 | 0.107<br>±0.024  | 0.207<br>±0.061 | 0.129<br>±0.023  | 0.126<br>±0.056  | 0.143<br>±0.000 | 0.157<br>±0.031 | 0.150<br>±0.045 | 0.143<br>±0.000 | 0.100<br>±0.018  | 0.245<br>±0.040   | 0.145<br>±0.026   | 0.221<br>±0.054                | 0.129<br>±0.028   | <div>0.288<br/>± 0.030</div>   | 0.150<br>±0.014   |
|               | Acc.1    | 0.240<br>±0.036                | 0.248<br>±0.057 | <b>0.250</b><br>± <b>0.034</b> | 0.243<br>±0.044                | 0.171<br>±0.039 | 0.107<br>±0.024  | 0.207<br>±0.061 | 0.129<br>±0.023  | 0.127<br>±0.054  | 0.143<br>±0.000 | 0.154<br>±0.024 | 0.151<br>±0.050 | 0.144<br>±0.008 | 0.100<br>±0.018  | 0.245<br>±0.040   | 0.145<br>±0.026   | 0.221<br>±0.046                | 0.131<br>±0.021   | <div>0.292<br/>± 0.035</div>   | 0.153<br>±0.010   |
|               | Acc.2    | 0.421<br>±0.089                | 0.436<br>±0.038 | 0.417<br>±0.029                | <b>0.464</b><br>± <b>0.055</b> | 0.272<br>±0.019 | 0.236<br>±0.026  | 0.374<br>±0.027 | 0.293<br>±0.023  | 0.253<br>±0.070  | 0.286<br>±0.000 | 0.341<br>±0.064 | 0.278<br>±0.031 | 0.281<br>±0.006 | 0.207<br>±0.027  | 0.414<br>±0.046   | 0.267<br>±0.034   | 0.406<br>±0.061                | 0.271<br>±0.029   | <div>0.500<br/>± 0.054</div>   | 0.281<br>±0.050   |
|               |          |                                |                 |                                |                                |                 |                  |                 |                  |                  |                 |                 |                 |                 |                  |                   |                   |                                |                   |                                |                   |

## D.3.3 GENERALIZATION DROP AFTER FINE-TUNING

Table 37: Average Model Performance Drop

| Model (Strategy)         | $\kappa$      | AUC           | BAcc          | Acc.1         | Acc.2         |
|--------------------------|---------------|---------------|---------------|---------------|---------------|
|                          | 0.066         | 0.063         | 0.057         | 0.057         | 0.066         |
| <b>DeepConvnet</b>       | $\pm 0.015$   | $\pm 0.009$   | $\pm 0.013$   | $\pm 0.013$   | $\pm 0.013$   |
|                          | 0.053         | 0.052         | 0.046         | 0.046         | 0.057         |
| <b>EEGNet</b>            | $\pm 0.013$   | $\pm 0.009$   | $\pm 0.011$   | $\pm 0.011$   | $\pm 0.010$   |
|                          | 0.035         | 0.036         | 0.030         | 0.030         | 0.040         |
| <b>Conformer</b>         | $\pm 0.010$   | $\pm 0.006$   | $\pm 0.009$   | $\pm 0.009$   | $\pm 0.010$   |
|                          | 0.070         | 0.072         | 0.060         | 0.060         | 0.078         |
| <b>CTNet</b>             | $\pm 0.016$   | $\pm 0.011$   | $\pm 0.014$   | $\pm 0.014$   | $\pm 0.015$   |
|                          | 0.007         | 0.005         | 0.006         | 0.006         | 0.005         |
| <b>BIOT (f)</b>          | $\pm 0.006$   | $\pm 0.005$   | $\pm 0.005$   | $\pm 0.005$   | $\pm 0.010$   |
|                          | <b>-0.011</b> | -0.013        | <b>-0.009</b> | <b>-0.009</b> | -0.012        |
| <b>BIOT (l)</b>          | $\pm 0.007$   | $\pm 0.007$   | $\pm 0.006$   | $\pm 0.006$   | $\pm 0.005$   |
|                          | 0.011         | 0.010         | 0.009         | 0.009         | 0.012         |
| <b>BENDR (f)</b>         | $\pm 0.009$   | $\pm 0.004$   | $\pm 0.008$   | $\pm 0.008$   | $\pm 0.008$   |
|                          | 0.001         | 0.002         | 0.001         | 0.001         | 0.001         |
| <b>BENDR (l)</b>         | $\pm 0.004$   | $\pm 0.004$   | $\pm 0.004$   | $\pm 0.004$   | $\pm 0.006$   |
|                          | -0.013        | <b>-0.019</b> | -0.011        | -0.012        | -0.019        |
| <b>CBraMod (f)</b>       | $\pm 0.008$   | $\pm 0.009$   | $\pm 0.007$   | $\pm 0.007$   | $\pm 0.009$   |
|                          | -0.009        | -0.029        | -0.007        | -0.008        | <b>-0.014</b> |
| <b>CBraMod (l)</b>       | $\pm 0.003$   | $\pm 0.004$   | $\pm 0.002$   | $\pm 0.002$   | $\pm 0.004$   |
|                          | 0.006         | 0.005         | 0.005         | 0.005         | 0.006         |
| <b>EEGPT (f)</b>         | $\pm 0.004$   | $\pm 0.003$   | $\pm 0.004$   | $\pm 0.004$   | $\pm 0.005$   |
|                          | 0.017         | 0.020         | 0.014         | 0.015         | 0.022         |
| <b>EEGPT (l)</b>         | $\pm 0.007$   | $\pm 0.008$   | $\pm 0.006$   | $\pm 0.006$   | $\pm 0.007$   |
|                          | -0.002        | -0.004        | -0.002        | -0.002        | -0.003        |
| <b>LaBraM (f)</b>        | $\pm 0.003$   | $\pm 0.004$   | $\pm 0.003$   | $\pm 0.002$   | $\pm 0.003$   |
|                          | -0.009        | -0.016        | -0.007        | -0.008        | -0.012        |
| <b>LaBraM (l)</b>        | $\pm 0.005$   | $\pm 0.005$   | $\pm 0.004$   | $\pm 0.004$   | $\pm 0.004$   |
|                          | 0.022         | 0.019         | 0.019         | 0.019         | 0.034         |
| <b>STEEGformer-s (f)</b> | $\pm 0.013$   | $\pm 0.009$   | $\pm 0.011$   | $\pm 0.011$   | $\pm 0.012$   |
|                          | 0.015         | 0.010         | 0.013         | 0.013         | 0.014         |
| <b>STEEGformer-s (l)</b> | $\pm 0.009$   | $\pm 0.005$   | $\pm 0.008$   | $\pm 0.008$   | $\pm 0.007$   |
|                          | 0.019         | 0.014         | 0.016         | 0.016         | 0.025         |
| <b>STEEGformer-b (f)</b> | $\pm 0.015$   | $\pm 0.011$   | $\pm 0.013$   | $\pm 0.013$   | $\pm 0.011$   |
|                          | 0.015         | 0.005         | 0.013         | 0.014         | 0.017         |
| <b>STEEGformer-b (l)</b> | $\pm 0.008$   | $\pm 0.004$   | $\pm 0.007$   | $\pm 0.007$   | $\pm 0.007$   |
|                          | 0.032         | 0.023         | 0.027         | 0.028         | 0.047         |
| <b>STEEGformer-l (f)</b> | $\pm 0.015$   | $\pm 0.012$   | $\pm 0.013$   | $\pm 0.012$   | $\pm 0.016$   |
|                          | 0.013         | 0.009         | 0.011         | 0.011         | 0.012         |
| <b>STEEGformer-l (l)</b> | $\pm 0.009$   | $\pm 0.005$   | $\pm 0.008$   | $\pm 0.008$   | $\pm 0.008$   |



Table 38: Per-Subject Average Drop on Seen Subjects (Post-Fine-Tuning).

| Subject | Metric   | DeepConvnet          | EEGNet               | Conformer            | CTNet                | BIOT (i)              | BIOT (i)              | BENDR (i)            | BENDR (i)             | CBraMod (i)           | CBraMod (i)           | EEGPT (i)             | EEGPT (i)            | LaBraM (i)            | LaBraM (i)            | STEEGformer-s (i)    | STEEGformer-s (i)    | STEEGformer-b (i)    | STEEGformer-b (i)    | STEEGformer-l (i)    | STEEGformer-l (i)    |
|---------|----------|----------------------|----------------------|----------------------|----------------------|-----------------------|-----------------------|----------------------|-----------------------|-----------------------|-----------------------|-----------------------|----------------------|-----------------------|-----------------------|----------------------|----------------------|----------------------|----------------------|----------------------|----------------------|
| sub1    | $\kappa$ | 0.076<br>$\pm 0.036$ | 0.074<br>$\pm 0.031$ | 0.032<br>$\pm 0.032$ | 0.091<br>$\pm 0.039$ | 0.018<br>$\pm 0.026$  | -0.022<br>$\pm 0.033$ | 0.001<br>$\pm 0.025$ | -0.001<br>$\pm 0.021$ | -0.016<br>$\pm 0.019$ | -0.008<br>$\pm 0.019$ | 0.002<br>$\pm 0.020$  | 0.022<br>$\pm 0.031$ | -0.001<br>$\pm 0.008$ | -0.012<br>$\pm 0.021$ | 0.028<br>$\pm 0.029$ | 0.016<br>$\pm 0.020$ | 0.036<br>$\pm 0.026$ | 0.009<br>$\pm 0.023$ | 0.050<br>$\pm 0.030$ | 0.010<br>$\pm 0.026$ |
|         | AUC      | 0.067<br>$\pm 0.020$ | 0.061<br>$\pm 0.019$ | 0.036<br>$\pm 0.021$ | 0.086<br>$\pm 0.028$ | 0.006<br>$\pm 0.014$  | -0.016<br>$\pm 0.023$ | 0.005<br>$\pm 0.014$ | -0.000<br>$\pm 0.011$ | -0.020<br>$\pm 0.014$ | -0.026<br>$\pm 0.029$ | 0.001<br>$\pm 0.009$  | 0.014<br>$\pm 0.021$ | -0.005<br>$\pm 0.012$ | -0.020<br>$\pm 0.026$ | 0.020<br>$\pm 0.022$ | 0.006<br>$\pm 0.010$ | 0.024<br>$\pm 0.014$ | 0.002<br>$\pm 0.011$ | 0.038<br>$\pm 0.013$ | 0.007<br>$\pm 0.009$ |
|         | BAcc     | 0.065<br>$\pm 0.031$ | 0.063<br>$\pm 0.026$ | 0.027<br>$\pm 0.028$ | 0.078<br>$\pm 0.033$ | 0.015<br>$\pm 0.022$  | -0.019<br>$\pm 0.029$ | 0.001<br>$\pm 0.022$ | -0.001<br>$\pm 0.018$ | -0.014<br>$\pm 0.016$ | -0.007<br>$\pm 0.016$ | 0.002<br>$\pm 0.017$  | 0.019<br>$\pm 0.026$ | -0.001<br>$\pm 0.007$ | -0.011<br>$\pm 0.018$ | 0.024<br>$\pm 0.025$ | 0.013<br>$\pm 0.017$ | 0.031<br>$\pm 0.022$ | 0.007<br>$\pm 0.020$ | 0.043<br>$\pm 0.026$ | 0.008<br>$\pm 0.022$ |
|         | Acc.1    | 0.065<br>$\pm 0.031$ | 0.063<br>$\pm 0.026$ | 0.027<br>$\pm 0.028$ | 0.078<br>$\pm 0.034$ | 0.015<br>$\pm 0.022$  | -0.019<br>$\pm 0.029$ | 0.001<br>$\pm 0.022$ | -0.001<br>$\pm 0.018$ | -0.014<br>$\pm 0.016$ | -0.007<br>$\pm 0.012$ | 0.002<br>$\pm 0.017$  | 0.018<br>$\pm 0.027$ | -0.003<br>$\pm 0.007$ | -0.012<br>$\pm 0.019$ | 0.024<br>$\pm 0.025$ | 0.013<br>$\pm 0.017$ | 0.029<br>$\pm 0.022$ | 0.008<br>$\pm 0.020$ | 0.044<br>$\pm 0.026$ | 0.007<br>$\pm 0.023$ |
|         | Acc.2    | 0.072<br>$\pm 0.030$ | 0.075<br>$\pm 0.036$ | 0.049<br>$\pm 0.038$ | 0.090<br>$\pm 0.042$ | -0.000<br>$\pm 0.032$ | -0.010<br>$\pm 0.023$ | 0.007<br>$\pm 0.021$ | -0.002<br>$\pm 0.026$ | -0.018<br>$\pm 0.023$ | -0.006<br>$\pm 0.019$ | 0.004<br>$\pm 0.019$  | 0.023<br>$\pm 0.036$ | -0.007<br>$\pm 0.009$ | -0.015<br>$\pm 0.030$ | 0.030<br>$\pm 0.025$ | 0.002<br>$\pm 0.035$ | 0.030<br>$\pm 0.034$ | 0.015<br>$\pm 0.021$ | 0.059<br>$\pm 0.030$ | 0.007<br>$\pm 0.023$ |
| sub10   | $\kappa$ | 0.065<br>$\pm 0.043$ | 0.069<br>$\pm 0.025$ | 0.035<br>$\pm 0.034$ | 0.067<br>$\pm 0.029$ | 0.007<br>$\pm 0.025$  | -0.001<br>$\pm 0.025$ | 0.018<br>$\pm 0.029$ | 0.006<br>$\pm 0.019$  | -0.007<br>$\pm 0.020$ | -0.009<br>$\pm 0.014$ | 0.003<br>$\pm 0.025$  | 0.035<br>$\pm 0.030$ | -0.008<br>$\pm 0.010$ | -0.014<br>$\pm 0.029$ | 0.021<br>$\pm 0.021$ | 0.030<br>$\pm 0.022$ | 0.012<br>$\pm 0.025$ | 0.018<br>$\pm 0.014$ | 0.043<br>$\pm 0.024$ | 0.013<br>$\pm 0.029$ |
|         | AUC      | 0.064<br>$\pm 0.017$ | 0.066<br>$\pm 0.011$ | 0.039<br>$\pm 0.016$ | 0.077<br>$\pm 0.016$ | 0.006<br>$\pm 0.020$  | 0.001<br>$\pm 0.020$  | 0.010<br>$\pm 0.015$ | 0.005<br>$\pm 0.010$  | -0.009<br>$\pm 0.021$ | -0.029<br>$\pm 0.031$ | 0.005<br>$\pm 0.014$  | 0.031<br>$\pm 0.025$ | -0.011<br>$\pm 0.015$ | -0.014<br>$\pm 0.026$ | 0.020<br>$\pm 0.012$ | 0.010<br>$\pm 0.019$ | 0.005<br>$\pm 0.011$ | 0.007<br>$\pm 0.016$ | 0.023<br>$\pm 0.016$ | 0.010<br>$\pm 0.017$ |
|         | BAcc     | 0.056<br>$\pm 0.037$ | 0.060<br>$\pm 0.021$ | 0.030<br>$\pm 0.030$ | 0.058<br>$\pm 0.025$ | 0.006<br>$\pm 0.022$  | -0.001<br>$\pm 0.022$ | 0.015<br>$\pm 0.025$ | 0.005<br>$\pm 0.016$  | -0.006<br>$\pm 0.017$ | -0.008<br>$\pm 0.012$ | 0.002<br>$\pm 0.022$  | 0.030<br>$\pm 0.025$ | -0.007<br>$\pm 0.009$ | -0.012<br>$\pm 0.025$ | 0.018<br>$\pm 0.018$ | 0.026<br>$\pm 0.019$ | 0.010<br>$\pm 0.021$ | 0.016<br>$\pm 0.012$ | 0.037<br>$\pm 0.021$ | 0.011<br>$\pm 0.025$ |
|         | Acc.1    | 0.056<br>$\pm 0.037$ | 0.059<br>$\pm 0.021$ | 0.030<br>$\pm 0.030$ | 0.057<br>$\pm 0.025$ | 0.006<br>$\pm 0.022$  | -0.001<br>$\pm 0.022$ | 0.015<br>$\pm 0.025$ | 0.005<br>$\pm 0.016$  | -0.008<br>$\pm 0.017$ | -0.006<br>$\pm 0.011$ | 0.004<br>$\pm 0.023$  | 0.029<br>$\pm 0.026$ | -0.008<br>$\pm 0.009$ | -0.013<br>$\pm 0.025$ | 0.018<br>$\pm 0.018$ | 0.025<br>$\pm 0.018$ | 0.010<br>$\pm 0.022$ | 0.017<br>$\pm 0.011$ | 0.037<br>$\pm 0.021$ | 0.013<br>$\pm 0.025$ |
|         | Acc.2    | 0.065<br>$\pm 0.032$ | 0.074<br>$\pm 0.025$ | 0.034<br>$\pm 0.028$ | 0.088<br>$\pm 0.029$ | 0.014<br>$\pm 0.035$  | 0.001<br>$\pm 0.022$  | 0.013<br>$\pm 0.022$ | 0.007<br>$\pm 0.024$  | -0.012<br>$\pm 0.022$ | -0.014<br>$\pm 0.022$ | -0.001<br>$\pm 0.026$ | 0.030<br>$\pm 0.025$ | -0.006<br>$\pm 0.012$ | -0.008<br>$\pm 0.021$ | 0.041<br>$\pm 0.022$ | 0.019<br>$\pm 0.032$ | 0.031<br>$\pm 0.018$ | 0.015<br>$\pm 0.021$ | 0.058<br>$\pm 0.021$ | 0.008<br>$\pm 0.023$ |
| sub11   | $\kappa$ | 0.084<br>$\pm 0.041$ | 0.065<br>$\pm 0.042$ | 0.044<br>$\pm 0.037$ | 0.093<br>$\pm 0.025$ | 0.006<br>$\pm 0.032$  | -0.005<br>$\pm 0.018$ | 0.011<br>$\pm 0.027$ | -0.006<br>$\pm 0.024$ | -0.027<br>$\pm 0.015$ | -0.012<br>$\pm 0.017$ | -0.001<br>$\pm 0.016$ | 0.010<br>$\pm 0.022$ | -0.001<br>$\pm 0.008$ | -0.001<br>$\pm 0.020$ | 0.049<br>$\pm 0.027$ | 0.020<br>$\pm 0.030$ | 0.033<br>$\pm 0.019$ | 0.036<br>$\pm 0.025$ | 0.068<br>$\pm 0.026$ | 0.040<br>$\pm 0.024$ |
|         | AUC      | 0.075<br>$\pm 0.021$ | 0.063<br>$\pm 0.025$ | 0.040<br>$\pm 0.022$ | 0.088<br>$\pm 0.019$ | 0.005<br>$\pm 0.016$  | -0.003<br>$\pm 0.024$ | 0.014<br>$\pm 0.018$ | 0.004<br>$\pm 0.012$  | -0.030<br>$\pm 0.017$ | -0.028<br>$\pm 0.019$ | 0.004<br>$\pm 0.010$  | 0.013<br>$\pm 0.014$ | -0.009<br>$\pm 0.011$ | -0.012<br>$\pm 0.022$ | 0.036<br>$\pm 0.010$ | 0.018<br>$\pm 0.021$ | 0.034<br>$\pm 0.012$ | 0.011<br>$\pm 0.012$ | 0.053<br>$\pm 0.013$ | 0.024<br>$\pm 0.012$ |
|         | BAcc     | 0.072<br>$\pm 0.035$ | 0.055<br>$\pm 0.036$ | 0.037<br>$\pm 0.032$ | 0.080<br>$\pm 0.021$ | 0.005<br>$\pm 0.027$  | -0.005<br>$\pm 0.015$ | 0.009<br>$\pm 0.023$ | -0.005<br>$\pm 0.021$ | -0.023<br>$\pm 0.013$ | -0.010<br>$\pm 0.014$ | -0.001<br>$\pm 0.014$ | 0.008<br>$\pm 0.019$ | -0.001<br>$\pm 0.007$ | -0.001<br>$\pm 0.017$ | 0.042<br>$\pm 0.023$ | 0.017<br>$\pm 0.026$ | 0.028<br>$\pm 0.016$ | 0.031<br>$\pm 0.021$ | 0.058<br>$\pm 0.023$ | 0.034<br>$\pm 0.021$ |
|         | Acc.1    | 0.072<br>$\pm 0.035$ | 0.055<br>$\pm 0.036$ | 0.038<br>$\pm 0.032$ | 0.080<br>$\pm 0.021$ | 0.005<br>$\pm 0.027$  | -0.005<br>$\pm 0.015$ | 0.009<br>$\pm 0.023$ | -0.005<br>$\pm 0.021$ | -0.024<br>$\pm 0.013$ | -0.008<br>$\pm 0.013$ | -0.002<br>$\pm 0.014$ | 0.011<br>$\pm 0.017$ | -0.002<br>$\pm 0.006$ | -0.002<br>$\pm 0.018$ | 0.042<br>$\pm 0.023$ | 0.018<br>$\pm 0.026$ | 0.028<br>$\pm 0.016$ | 0.032<br>$\pm 0.022$ | 0.059<br>$\pm 0.024$ | 0.035<br>$\pm 0.020$ |
|         | Acc.2    | 0.094<br>$\pm 0.034$ | 0.070<br>$\pm 0.041$ | 0.051<br>$\pm 0.050$ | 0.107<br>$\pm 0.026$ | 0.012<br>$\pm 0.024$  | -0.009<br>$\pm 0.032$ | 0.021<br>$\pm 0.020$ | 0.009<br>$\pm 0.034$  | -0.024<br>$\pm 0.028$ | -0.015<br>$\pm 0.022$ | 0.008<br>$\pm 0.013$  | 0.015<br>$\pm 0.027$ | -0.006<br>$\pm 0.007$ | -0.012<br>$\pm 0.025$ | 0.055<br>$\pm 0.022$ | 0.015<br>$\pm 0.022$ | 0.052<br>$\pm 0.025$ | 0.028<br>$\pm 0.023$ | 0.087<br>$\pm 0.023$ | 0.031<br>$\pm 0.021$ |

Continued on next page

| Subject | Metric   | DeepConvnet          | EEGNet               | Conformer            | CTNet                | BIOT (f)              | BIOT (l)              | BENDR (f)            | BENDR (l)             | CBraMod (f)           | CBraMod (l)           | EEGPT (f)             | EEGPT (l)            | LaBraM (f)            | LaBraM (l)            | STEEGformer-s (f)    | STEEGformer-s (l)    | STEEGformer-b (f)     | STEEGformer-b (l)    | STEEGformer-h (f)    | STEEGformer-h (l)    |
|---------|----------|----------------------|----------------------|----------------------|----------------------|-----------------------|-----------------------|----------------------|-----------------------|-----------------------|-----------------------|-----------------------|----------------------|-----------------------|-----------------------|----------------------|----------------------|-----------------------|----------------------|----------------------|----------------------|
| sub12   | $\kappa$ | 0.062<br>$\pm 0.032$ | 0.046<br>$\pm 0.030$ | 0.044<br>$\pm 0.025$ | 0.070<br>$\pm 0.022$ | 0.001<br>$\pm 0.025$  | -0.011<br>$\pm 0.018$ | 0.016<br>$\pm 0.018$ | 0.007<br>$\pm 0.016$  | -0.002<br>$\pm 0.016$ | -0.003<br>$\pm 0.020$ | 0.008<br>$\pm 0.019$  | 0.008<br>$\pm 0.030$ | -0.000<br>$\pm 0.003$ | -0.002<br>$\pm 0.015$ | 0.008<br>$\pm 0.027$ | 0.005<br>$\pm 0.022$ | -0.003<br>$\pm 0.037$ | 0.016<br>$\pm 0.022$ | 0.035<br>$\pm 0.020$ | 0.011<br>$\pm 0.019$ |
|         | AUC      | 0.061<br>$\pm 0.022$ | 0.052<br>$\pm 0.021$ | 0.041<br>$\pm 0.018$ | 0.068<br>$\pm 0.021$ | 0.003<br>$\pm 0.020$  | -0.015<br>$\pm 0.025$ | 0.013<br>$\pm 0.016$ | 0.003<br>$\pm 0.012$  | -0.006<br>$\pm 0.022$ | -0.026<br>$\pm 0.023$ | 0.004<br>$\pm 0.015$  | 0.014<br>$\pm 0.024$ | 0.002<br>$\pm 0.012$  | -0.016<br>$\pm 0.024$ | 0.009<br>$\pm 0.011$ | 0.002<br>$\pm 0.014$ | 0.002<br>$\pm 0.012$  | 0.001<br>$\pm 0.013$ | 0.013<br>$\pm 0.008$ | 0.005<br>$\pm 0.016$ |
|         | BAcc     | 0.054<br>$\pm 0.028$ | 0.039<br>$\pm 0.025$ | 0.038<br>$\pm 0.022$ | 0.060<br>$\pm 0.019$ | 0.001<br>$\pm 0.022$  | -0.009<br>$\pm 0.015$ | 0.014<br>$\pm 0.016$ | 0.006<br>$\pm 0.014$  | -0.001<br>$\pm 0.014$ | -0.002<br>$\pm 0.017$ | 0.007<br>$\pm 0.017$  | 0.007<br>$\pm 0.026$ | -0.000<br>$\pm 0.002$ | -0.001<br>$\pm 0.013$ | 0.007<br>$\pm 0.023$ | 0.004<br>$\pm 0.018$ | -0.003<br>$\pm 0.031$ | 0.014<br>$\pm 0.019$ | 0.030<br>$\pm 0.017$ | 0.010<br>$\pm 0.016$ |
|         | Acc_1    | 0.053<br>$\pm 0.028$ | 0.040<br>$\pm 0.025$ | 0.038<br>$\pm 0.022$ | 0.060<br>$\pm 0.019$ | 0.001<br>$\pm 0.022$  | -0.009<br>$\pm 0.015$ | 0.013<br>$\pm 0.016$ | 0.006<br>$\pm 0.014$  | -0.002<br>$\pm 0.014$ | -0.003<br>$\pm 0.017$ | 0.008<br>$\pm 0.018$  | 0.009<br>$\pm 0.026$ | 0.000<br>$\pm 0.005$  | -0.001<br>$\pm 0.014$ | 0.007<br>$\pm 0.023$ | 0.004<br>$\pm 0.019$ | -0.003<br>$\pm 0.034$ | 0.014<br>$\pm 0.019$ | 0.029<br>$\pm 0.017$ | 0.008<br>$\pm 0.016$ |
|         | Acc_2    | 0.067<br>$\pm 0.031$ | 0.052<br>$\pm 0.030$ | 0.055<br>$\pm 0.026$ | 0.082<br>$\pm 0.025$ | 0.003<br>$\pm 0.026$  | -0.018<br>$\pm 0.016$ | 0.010<br>$\pm 0.021$ | 0.002<br>$\pm 0.023$  | -0.012<br>$\pm 0.027$ | -0.005<br>$\pm 0.023$ | 0.005<br>$\pm 0.021$  | 0.012<br>$\pm 0.033$ | -0.001<br>$\pm 0.006$ | -0.011<br>$\pm 0.019$ | 0.038<br>$\pm 0.024$ | 0.007<br>$\pm 0.027$ | 0.016<br>$\pm 0.035$  | 0.012<br>$\pm 0.023$ | 0.044<br>$\pm 0.038$ | 0.008<br>$\pm 0.022$ |
| sub13   | $\kappa$ | 0.091<br>$\pm 0.032$ | 0.072<br>$\pm 0.030$ | 0.052<br>$\pm 0.031$ | 0.092<br>$\pm 0.039$ | 0.008<br>$\pm 0.030$  | -0.007<br>$\pm 0.024$ | 0.028<br>$\pm 0.034$ | 0.001<br>$\pm 0.023$  | -0.004<br>$\pm 0.024$ | -0.008<br>$\pm 0.010$ | 0.010<br>$\pm 0.022$  | 0.009<br>$\pm 0.033$ | -0.001<br>$\pm 0.008$ | -0.007<br>$\pm 0.027$ | 0.021<br>$\pm 0.031$ | 0.031<br>$\pm 0.026$ | 0.020<br>$\pm 0.022$  | 0.015<br>$\pm 0.024$ | 0.030<br>$\pm 0.016$ | 0.009<br>$\pm 0.035$ |
|         | AUC      | 0.073<br>$\pm 0.018$ | 0.054<br>$\pm 0.018$ | 0.043<br>$\pm 0.021$ | 0.084<br>$\pm 0.024$ | 0.005<br>$\pm 0.024$  | -0.019<br>$\pm 0.023$ | 0.013<br>$\pm 0.010$ | 0.006<br>$\pm 0.013$  | -0.004<br>$\pm 0.017$ | -0.035<br>$\pm 0.025$ | 0.007<br>$\pm 0.013$  | 0.014<br>$\pm 0.020$ | -0.008<br>$\pm 0.019$ | -0.011<br>$\pm 0.026$ | 0.023<br>$\pm 0.017$ | 0.018<br>$\pm 0.022$ | 0.021<br>$\pm 0.011$  | 0.005<br>$\pm 0.016$ | 0.023<br>$\pm 0.009$ | 0.012<br>$\pm 0.017$ |
|         | BAcc     | 0.078<br>$\pm 0.028$ | 0.061<br>$\pm 0.026$ | 0.044<br>$\pm 0.026$ | 0.079<br>$\pm 0.033$ | 0.007<br>$\pm 0.026$  | -0.006<br>$\pm 0.020$ | 0.024<br>$\pm 0.030$ | 0.001<br>$\pm 0.019$  | -0.004<br>$\pm 0.021$ | -0.007<br>$\pm 0.008$ | 0.008<br>$\pm 0.019$  | 0.007<br>$\pm 0.028$ | -0.001<br>$\pm 0.007$ | -0.006<br>$\pm 0.023$ | 0.018<br>$\pm 0.027$ | 0.027<br>$\pm 0.023$ | 0.017<br>$\pm 0.019$  | 0.013<br>$\pm 0.020$ | 0.026<br>$\pm 0.014$ | 0.008<br>$\pm 0.030$ |
|         | Acc_1    | 0.078<br>$\pm 0.027$ | 0.061<br>$\pm 0.026$ | 0.044<br>$\pm 0.026$ | 0.079<br>$\pm 0.033$ | 0.009<br>$\pm 0.025$  | -0.007<br>$\pm 0.020$ | 0.024<br>$\pm 0.029$ | 0.001<br>$\pm 0.019$  | -0.003<br>$\pm 0.022$ | -0.006<br>$\pm 0.008$ | 0.008<br>$\pm 0.020$  | 0.008<br>$\pm 0.028$ | -0.003<br>$\pm 0.006$ | -0.006<br>$\pm 0.023$ | 0.018<br>$\pm 0.027$ | 0.027<br>$\pm 0.022$ | 0.017<br>$\pm 0.018$  | 0.013<br>$\pm 0.022$ | 0.026<br>$\pm 0.013$ | 0.007<br>$\pm 0.030$ |
|         | Acc_2    | 0.080<br>$\pm 0.029$ | 0.061<br>$\pm 0.035$ | 0.050<br>$\pm 0.033$ | 0.094<br>$\pm 0.039$ | -0.002<br>$\pm 0.026$ | -0.014<br>$\pm 0.029$ | 0.015<br>$\pm 0.029$ | 0.009<br>$\pm 0.029$  | 0.001<br>$\pm 0.028$  | -0.015<br>$\pm 0.019$ | 0.015<br>$\pm 0.027$  | 0.033<br>$\pm 0.022$ | -0.002<br>$\pm 0.009$ | -0.012<br>$\pm 0.026$ | 0.032<br>$\pm 0.026$ | 0.022<br>$\pm 0.024$ | 0.019<br>$\pm 0.022$  | 0.016<br>$\pm 0.029$ | 0.042<br>$\pm 0.021$ | 0.012<br>$\pm 0.022$ |
| sub14   | $\kappa$ | 0.084<br>$\pm 0.043$ | 0.071<br>$\pm 0.037$ | 0.049<br>$\pm 0.036$ | 0.087<br>$\pm 0.038$ | 0.010<br>$\pm 0.022$  | -0.000<br>$\pm 0.024$ | 0.023<br>$\pm 0.024$ | 0.005<br>$\pm 0.021$  | -0.020<br>$\pm 0.023$ | -0.006<br>$\pm 0.011$ | 0.006<br>$\pm 0.025$  | 0.019<br>$\pm 0.037$ | -0.003<br>$\pm 0.006$ | -0.008<br>$\pm 0.023$ | 0.020<br>$\pm 0.031$ | 0.023<br>$\pm 0.032$ | 0.022<br>$\pm 0.018$  | 0.013<br>$\pm 0.022$ | 0.032<br>$\pm 0.029$ | 0.015<br>$\pm 0.026$ |
|         | AUC      | 0.062<br>$\pm 0.019$ | 0.060<br>$\pm 0.014$ | 0.038<br>$\pm 0.026$ | 0.072<br>$\pm 0.019$ | 0.017<br>$\pm 0.018$  | -0.012<br>$\pm 0.020$ | 0.010<br>$\pm 0.014$ | 0.002<br>$\pm 0.017$  | -0.026<br>$\pm 0.018$ | -0.025<br>$\pm 0.017$ | 0.003<br>$\pm 0.010$  | 0.033<br>$\pm 0.031$ | -0.011<br>$\pm 0.011$ | -0.010<br>$\pm 0.020$ | 0.021<br>$\pm 0.021$ | 0.011<br>$\pm 0.020$ | 0.018<br>$\pm 0.013$  | 0.005<br>$\pm 0.013$ | 0.025<br>$\pm 0.011$ | 0.007<br>$\pm 0.011$ |
|         | BAcc     | 0.072<br>$\pm 0.037$ | 0.061<br>$\pm 0.031$ | 0.042<br>$\pm 0.031$ | 0.074<br>$\pm 0.032$ | 0.008<br>$\pm 0.019$  | 0.000<br>$\pm 0.021$  | 0.020<br>$\pm 0.021$ | 0.004<br>$\pm 0.018$  | -0.017<br>$\pm 0.020$ | -0.005<br>$\pm 0.009$ | 0.005<br>$\pm 0.022$  | 0.016<br>$\pm 0.032$ | -0.003<br>$\pm 0.006$ | -0.006<br>$\pm 0.020$ | 0.017<br>$\pm 0.027$ | 0.019<br>$\pm 0.028$ | 0.019<br>$\pm 0.015$  | 0.011<br>$\pm 0.018$ | 0.027<br>$\pm 0.025$ | 0.013<br>$\pm 0.022$ |
|         | Acc_1    | 0.072<br>$\pm 0.036$ | 0.061<br>$\pm 0.031$ | 0.042<br>$\pm 0.031$ | 0.074<br>$\pm 0.032$ | 0.008<br>$\pm 0.019$  | 0.000<br>$\pm 0.021$  | 0.021<br>$\pm 0.020$ | 0.004<br>$\pm 0.018$  | -0.017<br>$\pm 0.020$ | -0.007<br>$\pm 0.010$ | 0.004<br>$\pm 0.021$  | 0.016<br>$\pm 0.032$ | -0.003<br>$\pm 0.004$ | -0.007<br>$\pm 0.021$ | 0.017<br>$\pm 0.027$ | 0.019<br>$\pm 0.027$ | 0.018<br>$\pm 0.015$  | 0.013<br>$\pm 0.020$ | 0.029<br>$\pm 0.023$ | 0.014<br>$\pm 0.024$ |
|         | Acc_2    | 0.072<br>$\pm 0.029$ | 0.067<br>$\pm 0.033$ | 0.042<br>$\pm 0.033$ | 0.076<br>$\pm 0.018$ | 0.015<br>$\pm 0.036$  | -0.009<br>$\pm 0.023$ | 0.017<br>$\pm 0.032$ | -0.001<br>$\pm 0.025$ | -0.030<br>$\pm 0.028$ | -0.014<br>$\pm 0.016$ | -0.003<br>$\pm 0.027$ | 0.019<br>$\pm 0.033$ | -0.005<br>$\pm 0.009$ | -0.007<br>$\pm 0.018$ | 0.027<br>$\pm 0.028$ | 0.022<br>$\pm 0.031$ | 0.032<br>$\pm 0.023$  | 0.018<br>$\pm 0.027$ | 0.049<br>$\pm 0.009$ | 0.007<br>$\pm 0.029$ |
| sub15   | $\kappa$ | 0.044<br>$\pm 0.022$ | 0.034<br>$\pm 0.022$ | 0.014<br>$\pm 0.024$ | 0.048<br>$\pm 0.020$ | 0.004<br>$\pm 0.027$  | -0.003<br>$\pm 0.022$ | 0.009<br>$\pm 0.022$ | -0.002<br>$\pm 0.027$ | -0.014<br>$\pm 0.030$ | -0.004<br>$\pm 0.015$ | 0.016<br>$\pm 0.020$  | 0.025<br>$\pm 0.016$ | -0.009<br>$\pm 0.008$ | -0.011<br>$\pm 0.015$ | 0.004<br>$\pm 0.020$ | 0.009<br>$\pm 0.025$ | 0.005<br>$\pm 0.017$  | 0.015<br>$\pm 0.027$ | 0.013<br>$\pm 0.018$ | 0.010<br>$\pm 0.025$ |

Continued on next page

| Subject                | Metric | DeepConvnet     | EEGNet          | Conformer       | CTNet           | BIOT (f)         | BIOT (l)         | BENDR (f)        | BENDR (l)        | CBraMod (f)      | CBraMod (l)      | EEGPT (f)        | EEGPT (l)       | LaBraM (f)       | LaBraM (l)       | STEEGformer-s (f) | STEEGformer-s (l) | STEEGformer-b (f) | STEEGformer-b (l) | STEEGformer-l (f) | STEEGformer-l (l) |
|------------------------|--------|-----------------|-----------------|-----------------|-----------------|------------------|------------------|------------------|------------------|------------------|------------------|------------------|-----------------|------------------|------------------|-------------------|-------------------|-------------------|-------------------|-------------------|-------------------|
|                        | AUC    | 0.055<br>±0.016 | 0.044<br>±0.014 | 0.029<br>±0.012 | 0.061<br>±0.011 | 0.002<br>±0.015  | -0.004<br>±0.029 | 0.006<br>±0.016  | -0.003<br>±0.011 | -0.020<br>±0.019 | -0.028<br>±0.031 | 0.011<br>±0.014  | 0.016<br>±0.022 | -0.005<br>±0.008 | -0.016<br>±0.014 | 0.008<br>±0.013   | 0.010<br>±0.018   | 0.002<br>±0.008   | 0.008<br>±0.015   | 0.010<br>±0.010   | 0.008<br>±0.013   |
|                        | BAcc   | 0.038<br>±0.019 | 0.029<br>±0.019 | 0.012<br>±0.021 | 0.041<br>±0.017 | 0.004<br>±0.023  | -0.003<br>±0.018 | 0.008<br>±0.019  | -0.002<br>±0.023 | -0.012<br>±0.025 | -0.004<br>±0.013 | 0.014<br>±0.017  | 0.021<br>±0.014 | -0.008<br>±0.007 | -0.009<br>±0.013 | 0.003<br>±0.017   | 0.007<br>±0.022   | 0.004<br>±0.014   | 0.013<br>±0.023   | 0.011<br>±0.015   | 0.008<br>±0.022   |
|                        | Acc.1  | 0.038<br>±0.019 | 0.029<br>±0.019 | 0.012<br>±0.021 | 0.042<br>±0.017 | 0.004<br>±0.023  | -0.003<br>±0.018 | 0.008<br>±0.019  | -0.002<br>±0.023 | -0.013<br>±0.025 | -0.004<br>±0.012 | 0.014<br>±0.018  | 0.023<br>±0.017 | -0.005<br>±0.006 | -0.010<br>±0.014 | 0.003<br>±0.017   | 0.007<br>±0.022   | 0.007<br>±0.016   | 0.014<br>±0.021   | 0.013<br>±0.015   | 0.007<br>±0.024   |
|                        | Acc.2  | 0.059<br>±0.026 | 0.053<br>±0.025 | 0.028<br>±0.019 | 0.066<br>±0.022 | 0.010<br>±0.026  | -0.007<br>±0.030 | 0.013<br>±0.017  | -0.011<br>±0.032 | -0.021<br>±0.035 | -0.013<br>±0.024 | 0.010<br>±0.021  | 0.016<br>±0.030 | -0.008<br>±0.010 | -0.016<br>±0.023 | 0.010<br>±0.022   | 0.021<br>±0.023   | 0.018<br>±0.015   | 0.014<br>±0.030   | 0.034<br>±0.025   | 0.010<br>±0.021   |
|                        | sub2   | κ               | 0.065<br>±0.032 | 0.038<br>±0.015 | 0.023<br>±0.027 | 0.057<br>±0.020  | 0.009<br>±0.032  | -0.021<br>±0.019 | 0.008<br>±0.025  | -0.004<br>±0.019 | -0.020<br>±0.019 | -0.011<br>±0.018 | 0.009<br>±0.024 | 0.009<br>±0.031  | -0.001<br>±0.005 | -0.004<br>±0.019  | 0.040<br>±0.045   | 0.017<br>±0.018   | 0.003<br>±0.031   | 0.020<br>±0.027   | 0.035<br>±0.021   |
| AUC                    |        | 0.060<br>±0.018 | 0.043<br>±0.015 | 0.027<br>±0.018 | 0.067<br>±0.019 | -0.002<br>±0.022 | -0.017<br>±0.025 | 0.011<br>±0.014  | -0.001<br>±0.013 | -0.027<br>±0.016 | -0.035<br>±0.025 | 0.009<br>±0.012  | 0.013<br>±0.034 | -0.002<br>±0.010 | -0.016<br>±0.020 | 0.030<br>±0.017   | 0.014<br>±0.013   | 0.012<br>±0.013   | 0.013<br>±0.013   | 0.021<br>±0.014   | 0.012<br>±0.013   |
| BAcc                   |        | 0.056<br>±0.028 | 0.032<br>±0.013 | 0.020<br>±0.023 | 0.049<br>±0.017 | 0.007<br>±0.027  | -0.018<br>±0.016 | 0.007<br>±0.022  | -0.003<br>±0.017 | -0.018<br>±0.016 | -0.009<br>±0.015 | 0.008<br>±0.020  | 0.007<br>±0.026 | -0.001<br>±0.004 | -0.004<br>±0.016 | 0.034<br>±0.039   | 0.014<br>±0.016   | 0.003<br>±0.027   | 0.017<br>±0.023   | 0.030<br>±0.018   | 0.021<br>±0.028   |
| Acc.1                  |        | 0.056<br>±0.027 | 0.032<br>±0.013 | 0.020<br>±0.023 | 0.049<br>±0.017 | 0.007<br>±0.027  | -0.018<br>±0.016 | 0.007<br>±0.022  | -0.003<br>±0.017 | -0.019<br>±0.017 | -0.009<br>±0.015 | 0.009<br>±0.021  | 0.010<br>±0.028 | -0.001<br>±0.005 | -0.005<br>±0.017 | 0.034<br>±0.039   | 0.014<br>±0.016   | 0.003<br>±0.028   | 0.017<br>±0.022   | 0.029<br>±0.021   | 0.020<br>±0.028   |
| Acc.2                  |        | 0.059<br>±0.036 | 0.043<br>±0.031 | 0.020<br>±0.030 | 0.063<br>±0.027 | 0.002<br>±0.033  | -0.013<br>±0.023 | 0.011<br>±0.023  | -0.001<br>±0.033 | -0.026<br>±0.020 | -0.015<br>±0.019 | 0.010<br>±0.029  | 0.012<br>±0.038 | 0.001<br>±0.006  | -0.007<br>±0.023 | 0.046<br>±0.031   | 0.012<br>±0.015   | 0.016<br>±0.027   | 0.024<br>±0.022   | 0.031<br>±0.018   | 0.031<br>±0.022   |
| sub3                   | κ      | 0.085<br>±0.037 | 0.050<br>±0.029 | 0.031<br>±0.035 | 0.093<br>±0.038 | 0.003<br>±0.020  | -0.013<br>±0.020 | 0.012<br>±0.019  | 0.004<br>±0.024  | -0.007<br>±0.022 | -0.007<br>±0.012 | 0.006<br>±0.021  | 0.020<br>±0.027 | -0.000<br>±0.005 | -0.008<br>±0.016 | 0.037<br>±0.018   | 0.010<br>±0.016   | 0.059<br>±0.039   | 0.016<br>±0.024   | 0.041<br>±0.030   | 0.014<br>±0.039   |
|                        | AUC    | 0.075<br>±0.024 | 0.051<br>±0.023 | 0.037<br>±0.025 | 0.089<br>±0.026 | 0.010<br>±0.010  | -0.008<br>±0.019 | 0.016<br>±0.016  | 0.008<br>±0.017  | -0.017<br>±0.021 | -0.025<br>±0.027 | 0.002<br>±0.012  | 0.021<br>±0.019 | 0.001<br>±0.017  | -0.012<br>±0.022 | 0.023<br>±0.017   | 0.008<br>±0.021   | 0.040<br>±0.022   | 0.004<br>±0.018   | 0.028<br>±0.020   | 0.005<br>±0.019   |
|                        | BAcc   | 0.073<br>±0.032 | 0.043<br>±0.025 | 0.027<br>±0.030 | 0.080<br>±0.033 | 0.003<br>±0.017  | -0.011<br>±0.017 | 0.011<br>±0.017  | 0.003<br>±0.021  | -0.006<br>±0.018 | -0.006<br>±0.010 | 0.005<br>±0.018  | 0.017<br>±0.023 | -0.000<br>±0.004 | -0.007<br>±0.014 | 0.032<br>±0.016   | 0.009<br>±0.014   | 0.051<br>±0.033   | 0.013<br>±0.021   | 0.036<br>±0.025   | 0.012<br>±0.033   |
|                        | Acc.1  | 0.073<br>±0.032 | 0.043<br>±0.025 | 0.027<br>±0.030 | 0.080<br>±0.033 | 0.003<br>±0.018  | -0.012<br>±0.018 | 0.010<br>±0.016  | 0.003<br>±0.021  | -0.007<br>±0.020 | -0.007<br>±0.010 | 0.003<br>±0.016  | 0.019<br>±0.023 | -0.003<br>±0.007 | -0.007<br>±0.015 | 0.032<br>±0.016   | 0.009<br>±0.013   | 0.049<br>±0.033   | 0.014<br>±0.021   | 0.034<br>±0.029   | 0.012<br>±0.035   |
|                        | Acc.2  | 0.081<br>±0.036 | 0.061<br>±0.034 | 0.036<br>±0.028 | 0.097<br>±0.036 | 0.012<br>±0.030  | -0.013<br>±0.018 | 0.011<br>±0.027  | 0.001<br>±0.024  | -0.015<br>±0.036 | -0.017<br>±0.017 | 0.006<br>±0.018  | 0.015<br>±0.029 | -0.001<br>±0.009 | -0.013<br>±0.023 | 0.040<br>±0.023   | 0.019<br>±0.022   | 0.045<br>±0.031   | 0.024<br>±0.023   | 0.040<br>±0.028   | 0.013<br>±0.028   |
| sub4                   | κ      | 0.051<br>±0.028 | 0.049<br>±0.029 | 0.034<br>±0.029 | 0.066<br>±0.029 | 0.017<br>±0.022  | -0.002<br>±0.021 | -0.002<br>±0.021 | 0.004<br>±0.013  | -0.015<br>±0.019 | -0.011<br>±0.014 | 0.008<br>±0.027  | 0.008<br>±0.022 | -0.008<br>±0.008 | -0.020<br>±0.021 | 0.017<br>±0.032   | 0.017<br>±0.030   | 0.015<br>±0.017   | 0.006<br>±0.019   | 0.030<br>±0.030   | 0.018<br>±0.024   |
|                        | AUC    | 0.061<br>±0.016 | 0.051<br>±0.012 | 0.039<br>±0.020 | 0.073<br>±0.025 | 0.009<br>±0.016  | -0.013<br>±0.021 | 0.007<br>±0.015  | -0.004<br>±0.013 | -0.017<br>±0.016 | -0.036<br>±0.026 | 0.006<br>±0.015  | 0.009<br>±0.019 | -0.007<br>±0.019 | -0.030<br>±0.036 | 0.013<br>±0.015   | 0.001<br>±0.018   | 0.014<br>±0.012   | 0.000<br>±0.015   | 0.029<br>±0.018   | 0.007<br>±0.017   |
| Continued on next page |        |                 |                 |                 |                 |                  |                  |                  |                  |                  |                  |                  |                 |                  |                  |                   |                   |                   |                   |                   |                   |

Continued on next page

| SubjectMetric |          | DeepConvnet     | EEGNet          | Conformer       | CTNet           | BIOT <sup>(f)</sup> | BIOT <sup>(f)</sup>             | BENDR <sup>(f)</sup> | BENDR <sup>(f)</sup> | CBraMod <sup>(f)</sup>          | CBraMod <sup>(f)</sup>          | EEGPT <sup>(f)</sup> | EEGPT <sup>(f)</sup> | LaBraM <sup>(f)</sup> | LaBraM <sup>(f)</sup>           | STEGformer-s <sup>(f)</sup> | STEGformer-s <sup>(f)</sup> | STEGformer-b <sup>(f)</sup> | STEGformer-b <sup>(f)</sup> | STEGformer-b <sup>(f)</sup> | STEGformer-b <sup>(f)</sup> |
|---------------|----------|-----------------|-----------------|-----------------|-----------------|---------------------|---------------------------------|----------------------|----------------------|---------------------------------|---------------------------------|----------------------|----------------------|-----------------------|---------------------------------|-----------------------------|-----------------------------|-----------------------------|-----------------------------|-----------------------------|-----------------------------|
|               | BAcc     | 0.043<br>±0.024 | 0.042<br>±0.025 | 0.029<br>±0.025 | 0.057<br>±0.025 | 0.015<br>±0.019     | -0.002<br>±0.018                | -0.002<br>±0.018     | 0.004<br>±0.011      | <b>-0.013</b><br>± <b>0.016</b> | -0.010<br>±0.012                | 0.007<br>±0.024      | 0.007<br>±0.019      | -0.007<br>±0.007      | -0.017<br>± 0.018               | 0.015<br>±0.027             | 0.015<br>±0.025             | 0.013<br>±0.015             | 0.005<br>±0.017             | 0.026<br>±0.026             | 0.015<br>±0.020             |
|               | Acc_1    | 0.044<br>±0.024 | 0.042<br>±0.024 | 0.029<br>±0.025 | 0.057<br>±0.025 | 0.015<br>±0.019     | -0.002<br>±0.018                | -0.002<br>±0.018     | 0.004<br>±0.011      | <b>-0.013</b><br>± <b>0.016</b> | -0.011<br>±0.015                | 0.007<br>±0.024      | 0.004<br>±0.020      | -0.005<br>±0.008      | -0.017<br>± 0.016               | 0.015<br>±0.027             | 0.014<br>±0.025             | 0.014<br>±0.017             | 0.005<br>±0.017             | 0.026<br>±0.024             | 0.015<br>±0.021             |
|               | Acc_2    | 0.053           | 0.054           | 0.045           | 0.071           | 0.021               | -0.013                          | 0.007                | -0.000               | -0.025                          | -0.011                          | 0.002                | 0.014                | -0.008                | <b>-0.021</b>                   | 0.020                       | 0.006                       | 0.017                       | 0.007                       | 0.061                       | 0.020                       |
|               |          | ±0.027          | ±0.027          | ±0.032          | ±0.033          | ±0.033              | ±0.027                          | ±0.021               | ±0.030               | ± 0.020                         | ±0.020                          | ±0.029               | ±0.020               | ±0.011                | ± <b>0.018</b>                  | ±0.027                      | ±0.020                      | ±0.016                      | ±0.028                      | ±0.030                      | ±0.021                      |
| sub5          | $\kappa$ | 0.052<br>±0.029 | 0.043<br>±0.027 | 0.026<br>±0.026 | 0.043<br>±0.038 | 0.000<br>±0.034     | -0.012<br>± 0.021               | -0.005<br>±0.022     | -0.000<br>±0.024     | -0.004<br>±0.024                | -0.011<br>±0.014                | 0.006<br>±0.023      | 0.017<br>±0.023      | 0.000<br>±0.000       | <b>-0.011</b><br>± <b>0.022</b> | -0.001<br>±0.024            | 0.009<br>±0.023             | 0.018<br>±0.023             | 0.017<br>±0.021             | 0.012<br>±0.018             | 0.000<br>±0.021             |
|               |          | 0.045<br>±0.015 | 0.035<br>±0.022 | 0.027<br>±0.016 | 0.046<br>±0.021 | 0.005<br>±0.025     | -0.016<br>±0.019                | 0.002<br>±0.014      | 0.007<br>±0.007      | -0.009<br>±0.019                | -0.032<br>± 0.026               | 0.006<br>±0.012      | 0.025<br>±0.025      | -0.002<br>±0.006      | <b>-0.023</b><br>± <b>0.029</b> | -0.002<br>±0.014            | 0.013<br>±0.016             | 0.008<br>±0.015             | 0.006<br>±0.011             | 0.004<br>±0.011             | 0.009<br>±0.014             |
|               | BAcc     | 0.044<br>±0.025 | 0.037<br>±0.023 | 0.022<br>±0.022 | 0.037<br>±0.032 | 0.000<br>±0.030     | -0.010<br>± 0.018               | -0.005<br>±0.018     | -0.000<br>±0.020     | -0.004<br>±0.021                | -0.009<br>±0.012                | 0.005<br>±0.020      | 0.014<br>±0.020      | 0.000<br>±0.000       | <b>-0.010</b><br>± <b>0.019</b> | -0.001<br>±0.021            | 0.008<br>±0.019             | 0.015<br>±0.020             | 0.014<br>±0.018             | 0.011<br>±0.016             | 0.000<br>±0.018             |
|               | Acc_1    | 0.045<br>±0.025 | 0.037<br>±0.023 | 0.021<br>±0.022 | 0.037<br>±0.032 | 0.003<br>±0.030     | -0.012<br>± 0.018               | -0.005<br>±0.018     | -0.000<br>±0.021     | -0.005<br>±0.021                | -0.009<br>±0.012                | 0.004<br>±0.022      | 0.013<br>±0.022      | -0.001<br>±0.004      | <b>-0.010</b><br>± <b>0.020</b> | -0.001<br>±0.021            | 0.009<br>±0.018             | 0.014<br>±0.021             | 0.015<br>±0.017             | 0.011<br>±0.015             | -0.000<br>±0.016            |
|               | Acc_2    | 0.047           | 0.050           | 0.027           | 0.051           | -0.013              | -0.014                          | -0.008               | 0.011                | -0.010                          | <b>-0.019</b>                   | 0.009                | 0.023                | -0.002                | -0.021                          | 0.013                       | 0.015                       | 0.018                       | 0.009                       | 0.018                       | 0.008                       |
|               |          | ±0.027          | ±0.027          | ±0.027          | ±0.034          | ±0.032              | ±0.019                          | ±0.034               | ±0.020               | ±0.025                          | ± <b>0.024</b>                  | ±0.022               | ±0.032               | ±0.007                | ± 0.030                         | ±0.032                      | ±0.032                      | ±0.025                      | ±0.029                      | ±0.019                      | ±0.016                      |
|               | $\kappa$ | 0.047<br>±0.030 | 0.043<br>±0.029 | 0.034<br>±0.029 | 0.057<br>±0.035 | -0.002<br>±0.023    | <b>-0.010</b><br>± <b>0.018</b> | 0.008<br>±0.016      | -0.004<br>±0.024     | -0.016<br>± 0.015               | -0.009<br>±0.015                | 0.001<br>±0.028      | 0.016<br>±0.029      | 0.000<br>±0.001       | -0.009<br>±0.017                | 0.026<br>±0.026             | 0.006<br>±0.023             | 0.031<br>±0.022             | 0.016<br>±0.025             | 0.027<br>±0.027             | 0.009<br>±0.030             |
| sub6          | AUC      | 0.050<br>±0.013 | 0.040<br>±0.021 | 0.027<br>±0.021 | 0.060<br>±0.019 | 0.006<br>±0.023     | -0.007<br>±0.021                | 0.009<br>±0.011      | -0.002<br>±0.012     | <b>-0.023</b><br>± <b>0.012</b> | -0.029<br>± 0.022               | 0.000<br>±0.015      | 0.019<br>±0.023      | -0.000<br>±0.002      | -0.017<br>±0.021                | 0.021<br>±0.020             | 0.011<br>±0.019             | 0.019<br>±0.017             | 0.007<br>±0.015             | 0.030<br>±0.010             | 0.006<br>±0.019             |
|               | BAcc     | 0.040<br>±0.026 | 0.037<br>±0.025 | 0.029<br>±0.025 | 0.049<br>±0.030 | -0.002<br>±0.020    | <b>-0.009</b><br>± <b>0.016</b> | 0.007<br>±0.014      | -0.003<br>±0.020     | -0.014<br>± 0.013               | -0.008<br>±0.013                | 0.001<br>±0.024      | 0.013<br>±0.025      | 0.000<br>±0.001       | -0.007<br>±0.015                | 0.022<br>±0.022             | 0.005<br>±0.020             | 0.027<br>±0.019             | 0.014<br>±0.022             | 0.023<br>±0.023             | 0.008<br>±0.026             |
|               | Acc_1    | 0.040<br>±0.026 | 0.037<br>±0.025 | 0.029<br>±0.025 | 0.049<br>±0.030 | -0.002<br>±0.020    | <b>-0.009</b><br>± <b>0.016</b> | 0.007<br>±0.014      | -0.004<br>±0.021     | -0.013<br>± 0.012               | -0.008<br>±0.012                | 0.000<br>±0.025      | 0.014<br>±0.027      | 0.000<br>±0.001       | -0.008<br>±0.014                | 0.022<br>±0.022             | 0.006<br>±0.019             | 0.029<br>±0.019             | 0.015<br>±0.024             | 0.027<br>±0.026             | 0.007<br>±0.026             |
|               | Acc_2    | 0.050           | 0.039           | 0.034           | 0.064           | 0.001               | -0.008                          | 0.004                | -0.001               | -0.017                          | <b>-0.015</b>                   | -0.001               | 0.025                | -0.000                | -0.012                          | 0.039                       | 0.019                       | 0.031                       | 0.017                       | 0.044                       | 0.014                       |
|               |          | ±0.026          | ±0.035          | ±0.026          | ±0.031          | ±0.021              | ±0.023                          | ±0.024               | ±0.023               | ± 0.014                         | ± <b>0.019</b>                  | ±0.024               | ±0.037               | ±0.006                | ±0.022                          | ±0.029                      | ±0.023                      | ±0.027                      | ±0.026                      | ±0.023                      | ±0.026                      |
| sub7          | $\kappa$ | 0.074<br>±0.026 | 0.057<br>±0.035 | 0.046<br>±0.039 | 0.063<br>±0.031 | 0.008<br>±0.022     | -0.017<br>± 0.015               | 0.020<br>±0.028      | 0.002<br>±0.026      | <b>-0.012</b><br>± <b>0.021</b> | -0.009<br>±0.016                | 0.008<br>±0.012      | 0.013<br>±0.023      | 0.002<br>±0.013       | -0.011<br>±0.015                | 0.026<br>±0.026             | -0.004<br>±0.017            | 0.012<br>±0.019             | -0.001<br>±0.033            | 0.016<br>±0.019             | 0.008<br>±0.034             |
|               |          | 0.078<br>±0.013 | 0.058<br>±0.015 | 0.041<br>±0.024 | 0.075<br>±0.018 | 0.003<br>±0.016     | -0.019<br>±0.018                | 0.018<br>±0.011      | 0.005<br>±0.017      | -0.032<br>± 0.022               | <b>-0.025</b><br>± <b>0.029</b> | 0.009<br>±0.009      | 0.024<br>±0.015      | -0.007<br>±0.018      | -0.017<br>±0.018                | 0.026<br>±0.013             | 0.007<br>±0.015             | 0.004<br>±0.015             | -0.002<br>±0.009            | 0.018<br>±0.012             | 0.003<br>±0.015             |
|               | AUC      | 0.063<br>±0.022 | 0.049<br>±0.030 | 0.039<br>±0.034 | 0.054<br>±0.026 | 0.007<br>±0.019     | -0.015<br>± 0.013               | 0.017<br>±0.024      | 0.002<br>±0.022      | <b>-0.010</b><br>± <b>0.018</b> | -0.007<br>±0.013                | 0.007<br>±0.010      | 0.011<br>±0.020      | 0.002<br>±0.011       | -0.010<br>±0.013                | 0.023<br>±0.023             | -0.003<br>±0.015            | 0.010<br>±0.017             | -0.001<br>±0.028            | 0.014<br>±0.016             | 0.007<br>±0.029             |
|               | BAcc     | 0.063<br>±0.022 | 0.049<br>±0.030 | 0.039<br>±0.034 | 0.054<br>±0.026 | 0.007<br>±0.019     | -0.015<br>± 0.013               | 0.017<br>±0.024      | 0.002<br>±0.022      | <b>-0.010</b><br>± <b>0.018</b> | -0.007<br>±0.013                | 0.007<br>±0.010      | 0.011<br>±0.020      | 0.002<br>±0.011       | -0.010<br>±0.013                | 0.023<br>±0.023             | -0.003<br>±0.015            | 0.010<br>±0.017             | -0.001<br>±0.028            | 0.014<br>±0.016             | 0.007<br>±0.029             |

Continued on next page

| SubjectMetric |          | DeepConvnet     | EEGNet          | Conformer       | CTNet           | BIOT <sup>(f)</sup> | BIOT <sup>(f)</sup> | BENDR <sup>(f)</sup> | BENDR <sup>(f)</sup> | CBraMod <sup>(f)</sup> | CBraMod <sup>(f)</sup> | EEGPT <sup>(f)</sup> | EEGPT <sup>(f)</sup> | LaBraM <sup>(f)</sup> | LaBraM <sup>(f)</sup> | STEEGformer-s <sup>(f)</sup> | STEEGformer-s <sup>(f)</sup> | STEEGformer-b <sup>(f)</sup> | STEEGformer-b <sup>(f)</sup> | STEEGformer-b <sup>(f)</sup> | STEEGformer-b <sup>(f)</sup> |
|---------------|----------|-----------------|-----------------|-----------------|-----------------|---------------------|---------------------|----------------------|----------------------|------------------------|------------------------|----------------------|----------------------|-----------------------|-----------------------|------------------------------|------------------------------|------------------------------|------------------------------|------------------------------|------------------------------|
| sub8          | Acc.1    | 0.064<br>±0.022 | 0.048<br>±0.030 | 0.039<br>±0.034 | 0.053<br>±0.026 | 0.007<br>±0.019     | -0.015<br>± 0.013   | 0.017<br>±0.024      | 0.002<br>±0.022      | -0.010<br>± 0.018      | -0.007<br>±0.013       | 0.006<br>±0.011      | 0.012<br>±0.021      | 0.001<br>±0.010       | -0.010<br>±0.013      | 0.022<br>±0.022              | -0.003<br>±0.014             | 0.008<br>±0.018              | 0.000<br>±0.028              | 0.016<br>±0.017              | 0.008<br>±0.029              |
|               | Acc.2    | 0.077<br>±0.027 | 0.053<br>±0.033 | 0.051<br>±0.040 | 0.079<br>±0.030 | -0.002<br>±0.032    | -0.019<br>± 0.025   | 0.023<br>±0.022      | 0.003<br>±0.024      | -0.015<br>± 0.025      | -0.015<br>±0.021       | 0.012<br>±0.019      | 0.032<br>±0.026      | -0.002<br>±0.012      | -0.011<br>±0.018      | 0.046<br>±0.021              | 0.002<br>±0.028              | 0.012<br>±0.028              | 0.003<br>±0.032              | 0.038<br>±0.027              | 0.007<br>±0.026              |
|               | $\kappa$ | 0.052<br>±0.043 | 0.039<br>±0.022 | 0.027<br>±0.035 | 0.059<br>±0.037 | 0.013<br>±0.026     | -0.016<br>± 0.022   | -0.000<br>±0.022     | -0.004<br>±0.016     | -0.029<br>± 0.022      | -0.010<br>±0.016       | 0.000<br>±0.021      | 0.023<br>±0.026      | -0.002<br>±0.004      | -0.010<br>±0.022      | 0.017<br>±0.030              | 0.027<br>±0.032              | 0.018<br>±0.029              | 0.023<br>±0.023              | 0.027<br>±0.028              | 0.003<br>±0.025              |
|               | AUC      | 0.060<br>±0.025 | 0.049<br>±0.018 | 0.036<br>±0.024 | 0.066<br>±0.022 | 0.009<br>±0.022     | -0.017<br>±0.012    | 0.004<br>±0.015      | -0.002<br>±0.014     | -0.031<br>± 0.025      | -0.029<br>± 0.029      | 0.004<br>±0.009      | 0.033<br>±0.030      | -0.003<br>±0.007      | -0.008<br>±0.019      | 0.012<br>±0.014              | 0.015<br>±0.017              | 0.003<br>±0.012              | 0.010<br>±0.009              | 0.013<br>±0.015              | 0.012<br>±0.020              |
|               | BAcc     | 0.044<br>±0.037 | 0.033<br>±0.019 | 0.023<br>±0.030 | 0.051<br>±0.032 | 0.011<br>±0.022     | -0.013<br>± 0.019   | -0.000<br>±0.019     | -0.003<br>±0.014     | -0.024<br>± 0.019      | -0.008<br>±0.013       | 0.000<br>±0.018      | 0.020<br>±0.023      | -0.002<br>±0.003      | -0.008<br>±0.019      | 0.014<br>±0.025              | 0.023<br>±0.028              | 0.016<br>±0.025              | 0.020<br>±0.020              | 0.023<br>±0.024              | 0.003<br>±0.022              |
|               | Acc.1    | 0.044<br>±0.037 | 0.034<br>±0.019 | 0.023<br>±0.030 | 0.051<br>±0.032 | 0.011<br>±0.022     | -0.013<br>± 0.019   | -0.001<br>±0.020     | -0.003<br>±0.014     | -0.024<br>± 0.019      | -0.007<br>±0.014       | -0.000<br>±0.018     | 0.021<br>±0.024      | -0.002<br>±0.003      | -0.009<br>±0.019      | 0.014<br>±0.026              | 0.023<br>±0.028              | 0.016<br>±0.026              | 0.020<br>±0.021              | 0.024<br>±0.025              | 0.003<br>±0.021              |
| sub9          | Acc.2    | 0.062<br>±0.040 | 0.053<br>±0.029 | 0.037<br>±0.027 | 0.069<br>±0.036 | 0.016<br>±0.028     | -0.010<br>±0.023    | 0.005<br>±0.025      | -0.005<br>±0.026     | -0.038<br>± 0.025      | -0.018<br>± 0.023      | 0.002<br>±0.026      | 0.029<br>±0.029      | -0.002<br>±0.006      | -0.009<br>±0.022      | 0.032<br>±0.036              | 0.017<br>±0.026              | 0.020<br>±0.023              | 0.022<br>±0.031              | 0.059<br>±0.024              | 0.004<br>±0.032              |
|               | $\kappa$ | 0.061<br>±0.028 | 0.053<br>±0.027 | 0.040<br>±0.024 | 0.061<br>±0.034 | 0.001<br>±0.021     | -0.019<br>± 0.022   | 0.014<br>±0.025      | 0.006<br>±0.015      | -0.005<br>±0.026       | -0.012<br>± 0.018      | 0.002<br>±0.020      | 0.017<br>±0.020      | -0.000<br>±0.001      | -0.003<br>±0.019      | 0.020<br>±0.024              | 0.013<br>±0.027              | 0.003<br>±0.017              | 0.014<br>±0.018              | 0.014<br>±0.028              | 0.015<br>±0.032              |
|               | AUC      | 0.063<br>±0.018 | 0.058<br>±0.020 | 0.041<br>±0.016 | 0.071<br>±0.021 | -0.007<br>±0.020    | -0.024<br>± 0.023   | 0.014<br>±0.013      | 0.001<br>±0.011      | -0.014<br>±0.022       | -0.028<br>± 0.030      | 0.008<br>±0.011      | 0.018<br>±0.014      | -0.001<br>±0.008      | -0.010<br>±0.017      | 0.020<br>±0.016              | 0.010<br>±0.019              | 0.009<br>±0.013              | 0.003<br>±0.016              | 0.013<br>±0.017              | 0.007<br>±0.019              |
|               | BAcc     | 0.053<br>±0.024 | 0.045<br>±0.023 | 0.034<br>±0.021 | 0.052<br>±0.029 | 0.001<br>±0.018     | -0.017<br>± 0.019   | 0.012<br>±0.022      | 0.005<br>±0.013      | -0.005<br>±0.023       | -0.010<br>± 0.016      | 0.002<br>±0.017      | 0.015<br>±0.017      | -0.000<br>±0.001      | -0.003<br>±0.017      | 0.018<br>±0.021              | 0.011<br>±0.023              | 0.003<br>±0.015              | 0.012<br>±0.015              | 0.012<br>±0.024              | 0.013<br>±0.027              |
|               | Acc.1    | 0.053<br>±0.024 | 0.045<br>±0.023 | 0.034<br>±0.021 | 0.053<br>±0.030 | 0.003<br>±0.019     | -0.017<br>± 0.019   | 0.013<br>±0.021      | 0.005<br>±0.013      | -0.004<br>±0.022       | -0.012<br>± 0.017      | 0.002<br>±0.015      | 0.016<br>±0.017      | -0.001<br>±0.003      | -0.001<br>±0.017      | 0.018<br>±0.021              | 0.011<br>±0.024              | 0.003<br>±0.016              | 0.014<br>±0.018              | 0.011<br>±0.026              | 0.012<br>±0.028              |
|               | Acc.2    | 0.055<br>±0.037 | 0.058<br>±0.026 | 0.041<br>±0.022 | 0.080<br>±0.034 | -0.010<br>±0.024    | -0.021<br>± 0.026   | 0.025<br>±0.028      | 0.002<br>±0.013      | -0.009<br>±0.022       | -0.020<br>± 0.018      | 0.011<br>±0.017      | 0.026<br>±0.015      | -0.000<br>±0.006      | -0.009<br>±0.020      | 0.040<br>±0.032              | 0.011<br>±0.022              | 0.018<br>±0.023              | 0.023<br>±0.026              | 0.049<br>±0.032              | 0.005<br>±0.026              |

## E 4-COMMAND INNER SPEECH CLASSIFICATION

## E.1 POPULATION-LEVEL RESULTS

Table 39: Average Performance Metrics Across All Subjects of Population-Trained Models

| Model (Training strategy) | $\kappa$     | AUC          | BAcc         | Acc.1        | Acc.2        |
|---------------------------|--------------|--------------|--------------|--------------|--------------|
|                           | 0.057        | <b>0.563</b> | 0.293        | 0.293        | 0.558        |
| <b>DeepConvnet</b>        | $\pm 0.030$  | $\pm 0.036$  | $\pm 0.022$  | $\pm 0.022$  | $\pm 0.051$  |
|                           | 0.055        | 0.554        | 0.291        | 0.291        | <b>0.563</b> |
| <b>EEGNet</b>             | $\pm 0.029$  | $\pm 0.020$  | $\pm 0.022$  | $\pm 0.022$  | $\pm 0.031$  |
|                           | 0.054        | 0.546        | 0.291        | 0.291        | 0.559        |
| <b>Conformer</b>          | $\pm 0.037$  | $\pm 0.027$  | $\pm 0.028$  | $\pm 0.028$  | $\pm 0.035$  |
|                           | 0.056        | 0.559        | 0.292        | 0.292        | 0.568        |
| <b>CTNet</b>              | $\pm 0.044$  | $\pm 0.031$  | $\pm 0.033$  | $\pm 0.033$  | $\pm 0.027$  |
|                           | -0.019       | 0.491        | 0.236        | 0.236        | 0.495        |
| <b>BIOT (f)</b>           | $\pm 0.024$  | $\pm 0.027$  | $\pm 0.018$  | $\pm 0.018$  | $\pm 0.030$  |
|                           | -0.002       | 0.499        | 0.249        | 0.249        | 0.502        |
| <b>BIOT (l)</b>           | $\pm 0.048$  | $\pm 0.025$  | $\pm 0.036$  | $\pm 0.036$  | $\pm 0.036$  |
|                           | <b>0.061</b> | 0.545        | <b>0.296</b> | <b>0.296</b> | 0.535        |
| <b>BENDR (f)</b>          | $\pm 0.027$  | $\pm 0.019$  | $\pm 0.020$  | $\pm 0.020$  | $\pm 0.017$  |
|                           | 0.004        | 0.516        | 0.253        | 0.253        | 0.512        |
| <b>BENDR (l)</b>          | $\pm 0.048$  | $\pm 0.032$  | $\pm 0.036$  | $\pm 0.036$  | $\pm 0.034$  |
|                           | 0.085        | 0.564        | 0.314        | 0.314        | 0.561        |
| <b>CBraMod (f)</b>        | $\pm 0.045$  | $\pm 0.029$  | $\pm 0.034$  | $\pm 0.033$  | $\pm 0.027$  |
|                           | 0.054        | 0.544        | 0.290        | 0.290        | 0.538        |
| <b>CBraMod (l)</b>        | $\pm 0.022$  | $\pm 0.027$  | $\pm 0.017$  | $\pm 0.017$  | $\pm 0.035$  |
|                           | 0.001        | 0.499        | 0.250        | 0.251        | 0.496        |
| <b>EEGPT (f)</b>          | $\pm 0.045$  | $\pm 0.030$  | $\pm 0.033$  | $\pm 0.034$  | $\pm 0.036$  |
|                           | 0.026        | 0.530        | 0.270        | 0.270        | 0.536        |
| <b>EEGPT (l)</b>          | $\pm 0.033$  | $\pm 0.025$  | $\pm 0.025$  | $\pm 0.025$  | $\pm 0.034$  |
|                           | 0.000        | 0.502        | 0.250        | 0.250        | 0.499        |
| <b>LaBraM (f)</b>         | $\pm 0.044$  | $\pm 0.026$  | $\pm 0.033$  | $\pm 0.033$  | $\pm 0.028$  |
|                           | 0.016        | 0.518        | 0.262        | 0.262        | 0.523        |
| <b>LaBraM (l)</b>         | $\pm 0.030$  | $\pm 0.024$  | $\pm 0.022$  | $\pm 0.022$  | $\pm 0.029$  |
|                           | 0.005        | 0.514        | 0.254        | 0.253        | 0.522        |
| <b>STEEGformer-s (f)</b>  | $\pm 0.040$  | $\pm 0.021$  | $\pm 0.030$  | $\pm 0.030$  | $\pm 0.044$  |
|                           | -0.017       | 0.491        | 0.237        | 0.236        | 0.491        |
| <b>STEEGformer-s (l)</b>  | $\pm 0.036$  | $\pm 0.021$  | $\pm 0.027$  | $\pm 0.027$  | $\pm 0.022$  |
|                           | 0.010        | 0.510        | 0.258        | 0.258        | 0.508        |
| <b>STEEGformer-b (f)</b>  | $\pm 0.024$  | $\pm 0.023$  | $\pm 0.018$  | $\pm 0.018$  | $\pm 0.025$  |
|                           | 0.007        | 0.498        | 0.255        | 0.255        | 0.499        |
| <b>STEEGformer-b (l)</b>  | $\pm 0.033$  | $\pm 0.021$  | $\pm 0.024$  | $\pm 0.025$  | $\pm 0.024$  |
|                           | 0.024        | 0.519        | 0.268        | 0.264        | 0.518        |
| <b>STEEGformer-l (f)</b>  | $\pm 0.038$  | $\pm 0.018$  | $\pm 0.029$  | $\pm 0.035$  | $\pm 0.037$  |
|                           | -0.010       | 0.478        | 0.242        | 0.243        | 0.478        |
| <b>STEEGformer-l (l)</b>  | $\pm 0.020$  | $\pm 0.029$  | $\pm 0.015$  | $\pm 0.016$  | $\pm 0.028$  |

Table 40: Per-Subject Performance Metrics of Population-Trained Models

| SubjectMetric |          | DeepConvnet                                      | EEGNet                      | Conformer                   | CTNet                                            | BIOT (f)              | BIOT (l)              | BENDR (f)                   | BENDR (l)             | CBraMod (f)                                      | CBraMod (l)                                      | EEGPT (f)                   | EEGPT (l)                   | LaBraM (f)                                       | LaBraM (l)            | STEEGformer-s (f)     | STEEGformer-s (l)     | STEEGformer-b (f)     | STEEGformer-b (l)     | STEEGformer-l (f)     | STEEGformer-l (l)     |
|---------------|----------|--------------------------------------------------|-----------------------------|-----------------------------|--------------------------------------------------|-----------------------|-----------------------|-----------------------------|-----------------------|--------------------------------------------------|--------------------------------------------------|-----------------------------|-----------------------------|--------------------------------------------------|-----------------------|-----------------------|-----------------------|-----------------------|-----------------------|-----------------------|-----------------------|
| sub1          | $\kappa$ | $\begin{matrix} 0.107 \\ \pm 0.060 \end{matrix}$ | 0.047<br>$\pm 0.135$        | 0.013<br>$\pm 0.096$        | -0.007<br>$\pm 0.121$                            | -0.033<br>$\pm 0.075$ | -0.033<br>$\pm 0.113$ | 0.087<br>$\pm 0.090$        | 0.027<br>$\pm 0.119$  | <b>0.100</b><br>$\pm 0.053$                      | 0.040<br>$\pm 0.015$                             | 0.053<br>$\pm 0.117$        | 0.007<br>$\pm 0.060$        | -0.013<br>$\pm 0.143$                            | 0.013<br>$\pm 0.065$  | -0.033<br>$\pm 0.078$ | 0.007<br>$\pm 0.043$  | -0.007<br>$\pm 0.060$ | -0.020<br>$\pm 0.119$ | 0.013<br>$\pm 0.056$  | -0.007<br>$\pm 0.095$ |
|               | AUC      | $\begin{matrix} 0.588 \\ \pm 0.076 \end{matrix}$ | 0.546<br>$\pm 0.061$        | 0.540<br>$\pm 0.065$        | 0.538<br>$\pm 0.025$                             | 0.468<br>$\pm 0.024$  | 0.489<br>$\pm 0.088$  | 0.566<br>$\pm 0.048$        | 0.566<br>$\pm 0.035$  | <b>0.572</b><br>$\pm 0.055$                      | 0.538<br>$\pm 0.037$                             | 0.521<br>$\pm 0.090$        | 0.510<br>$\pm 0.043$        | 0.503<br>$\pm 0.085$                             | 0.535<br>$\pm 0.029$  | 0.493<br>$\pm 0.071$  | 0.483<br>$\pm 0.064$  | 0.534<br>$\pm 0.048$  | 0.495<br>$\pm 0.062$  | 0.516<br>$\pm 0.037$  | 0.458<br>$\pm 0.073$  |
|               | BAcc     | $\begin{matrix} 0.330 \\ \pm 0.045 \end{matrix}$ | 0.285<br>$\pm 0.101$        | 0.260<br>$\pm 0.072$        | 0.245<br>$\pm 0.091$                             | 0.225<br>$\pm 0.056$  | 0.225<br>$\pm 0.085$  | 0.315<br>$\pm 0.068$        | 0.270<br>$\pm 0.089$  | <b>0.325</b><br>$\pm 0.040$                      | 0.280<br>$\pm 0.011$                             | 0.290<br>$\pm 0.088$        | 0.255<br>$\pm 0.045$        | 0.240<br>$\pm 0.107$                             | 0.260<br>$\pm 0.049$  | 0.225<br>$\pm 0.059$  | 0.255<br>$\pm 0.033$  | 0.245<br>$\pm 0.045$  | 0.235<br>$\pm 0.089$  | 0.260<br>$\pm 0.042$  | 0.245<br>$\pm 0.072$  |
|               | Acc.1    | $\begin{matrix} 0.330 \\ \pm 0.045 \end{matrix}$ | 0.285<br>$\pm 0.101$        | 0.260<br>$\pm 0.072$        | 0.245<br>$\pm 0.091$                             | 0.225<br>$\pm 0.056$  | 0.225<br>$\pm 0.085$  | 0.315<br>$\pm 0.068$        | 0.270<br>$\pm 0.089$  | <b>0.325</b><br>$\pm 0.040$                      | 0.280<br>$\pm 0.011$                             | 0.290<br>$\pm 0.088$        | 0.255<br>$\pm 0.045$        | 0.240<br>$\pm 0.107$                             | 0.265<br>$\pm 0.055$  | 0.225<br>$\pm 0.059$  | 0.250<br>$\pm 0.040$  | 0.245<br>$\pm 0.045$  | 0.235<br>$\pm 0.089$  | 0.247<br>$\pm 0.040$  | 0.245<br>$\pm 0.072$  |
|               | Acc.2    | <b>0.580</b><br>$\pm 0.076$                      | 0.540<br>$\pm 0.060$        | <b>0.580</b><br>$\pm 0.114$ | $\begin{matrix} 0.590 \\ \pm 0.049 \end{matrix}$ | 0.460<br>$\pm 0.022$  | 0.515<br>$\pm 0.101$  | 0.545<br>$\pm 0.060$        | 0.540<br>$\pm 0.088$  | $\begin{matrix} 0.590 \\ \pm 0.049 \end{matrix}$ | 0.550<br>$\pm 0.056$                             | 0.530<br>$\pm 0.069$        | 0.490<br>$\pm 0.068$        | 0.510<br>$\pm 0.129$                             | 0.555<br>$\pm 0.057$  | 0.490<br>$\pm 0.060$  | 0.480<br>$\pm 0.062$  | 0.565<br>$\pm 0.084$  | 0.505<br>$\pm 0.048$  | 0.531<br>$\pm 0.059$  | 0.485<br>$\pm 0.095$  |
| sub10         | $\kappa$ | $\begin{matrix} 0.050 \\ \pm 0.099 \end{matrix}$ | 0.044<br>$\pm 0.082$        | 0.044<br>$\pm 0.130$        | 0.022<br>$\pm 0.105$                             | -0.050<br>$\pm 0.101$ | 0.028<br>$\pm 0.071$  | <b>0.056</b><br>$\pm 0.116$ | -0.056<br>$\pm 0.104$ | 0.039<br>$\pm 0.087$                             | $\begin{matrix} 0.067 \\ \pm 0.082 \end{matrix}$ | <b>0.056</b><br>$\pm 0.071$ | <b>0.056</b><br>$\pm 0.081$ | -0.022<br>$\pm 0.077$                            | -0.011<br>$\pm 0.058$ | 0.011<br>$\pm 0.091$  | -0.050<br>$\pm 0.087$ | -0.011<br>$\pm 0.054$ | -0.044<br>$\pm 0.061$ | -0.017<br>$\pm 0.064$ | -0.033<br>$\pm 0.077$ |
|               | AUC      | $\begin{matrix} 0.538 \\ \pm 0.059 \end{matrix}$ | 0.565<br>$\pm 0.053$        | 0.521<br>$\pm 0.074$        | 0.521<br>$\pm 0.043$                             | 0.462<br>$\pm 0.036$  | 0.517<br>$\pm 0.038$  | 0.527<br>$\pm 0.055$        | 0.470<br>$\pm 0.052$  | <b>0.566</b><br>$\pm 0.076$                      | $\begin{matrix} 0.584 \\ \pm 0.019 \end{matrix}$ | 0.531<br>$\pm 0.036$        | 0.547<br>$\pm 0.042$        | 0.466<br>$\pm 0.084$                             | 0.497<br>$\pm 0.035$  | 0.501<br>$\pm 0.084$  | 0.464<br>$\pm 0.033$  | 0.489<br>$\pm 0.036$  | 0.470<br>$\pm 0.020$  | 0.498<br>$\pm 0.038$  | 0.455<br>$\pm 0.039$  |
|               | BAcc     | $\begin{matrix} 0.287 \\ \pm 0.074 \end{matrix}$ | 0.283<br>$\pm 0.062$        | 0.283<br>$\pm 0.097$        | 0.267<br>$\pm 0.079$                             | 0.212<br>$\pm 0.076$  | 0.271<br>$\pm 0.053$  | <b>0.292</b><br>$\pm 0.087$ | 0.208<br>$\pm 0.078$  | 0.279<br>$\pm 0.065$                             | $\begin{matrix} 0.300 \\ \pm 0.062 \end{matrix}$ | <b>0.292</b><br>$\pm 0.053$ | 0.292<br>$\pm 0.061$        | 0.233<br>$\pm 0.058$                             | 0.242<br>$\pm 0.043$  | 0.258<br>$\pm 0.068$  | 0.212<br>$\pm 0.065$  | 0.242<br>$\pm 0.041$  | 0.217<br>$\pm 0.046$  | 0.237<br>$\pm 0.048$  | 0.225<br>$\pm 0.058$  |
|               | Acc.1    | $\begin{matrix} 0.287 \\ \pm 0.074 \end{matrix}$ | 0.283<br>$\pm 0.062$        | 0.283<br>$\pm 0.097$        | 0.267<br>$\pm 0.079$                             | 0.212<br>$\pm 0.076$  | 0.271<br>$\pm 0.053$  | 0.292<br>$\pm 0.087$        | 0.208<br>$\pm 0.078$  | 0.279<br>$\pm 0.065$                             | $\begin{matrix} 0.300 \\ \pm 0.062 \end{matrix}$ | <b>0.292</b><br>$\pm 0.053$ | <b>0.292</b><br>$\pm 0.061$ | 0.233<br>$\pm 0.058$                             | 0.242<br>$\pm 0.043$  | 0.258<br>$\pm 0.068$  | 0.212<br>$\pm 0.065$  | 0.242<br>$\pm 0.041$  | 0.217<br>$\pm 0.046$  | 0.237<br>$\pm 0.056$  | 0.225<br>$\pm 0.058$  |
|               | Acc.2    | $\begin{matrix} 0.504 \\ \pm 0.085 \end{matrix}$ | <b>0.588</b><br>$\pm 0.031$ | 0.521<br>$\pm 0.104$        | 0.542<br>$\pm 0.069$                             | 0.463<br>$\pm 0.054$  | 0.504<br>$\pm 0.048$  | 0.512<br>$\pm 0.043$        | 0.492<br>$\pm 0.032$  | 0.562<br>$\pm 0.090$                             | $\begin{matrix} 0.596 \\ \pm 0.056 \end{matrix}$ | 0.512<br>$\pm 0.024$        | 0.525<br>$\pm 0.031$        | 0.438<br>$\pm 0.078$                             | 0.483<br>$\pm 0.027$  | 0.517<br>$\pm 0.099$  | 0.450<br>$\pm 0.052$  | 0.492<br>$\pm 0.032$  | 0.438<br>$\pm 0.026$  | 0.456<br>$\pm 0.034$  | 0.433<br>$\pm 0.060$  |
| sub2          | $\kappa$ | <b>0.089</b><br>$\pm 0.119$                      | 0.072<br>$\pm 0.101$        | 0.039<br>$\pm 0.032$        | 0.056<br>$\pm 0.086$                             | -0.011<br>$\pm 0.119$ | 0.039<br>$\pm 0.042$  | 0.033<br>$\pm 0.084$        | -0.067<br>$\pm 0.085$ | 0.028<br>$\pm 0.068$                             | 0.033<br>$\pm 0.072$                             | -0.039<br>$\pm 0.089$       | -0.056<br>$\pm 0.068$       | $\begin{matrix} 0.128 \\ \pm 0.061 \end{matrix}$ | 0.039<br>$\pm 0.078$  | -0.022<br>$\pm 0.023$ | -0.078<br>$\pm 0.012$ | 0.000<br>$\pm 0.056$  | -0.011<br>$\pm 0.097$ | 0.050<br>$\pm 0.108$  | -0.033<br>$\pm 0.050$ |
|               | AUC      | $\begin{matrix} 0.595 \\ \pm 0.079 \end{matrix}$ | 0.562<br>$\pm 0.039$        | 0.533<br>$\pm 0.033$        | 0.529<br>$\pm 0.047$                             | 0.478<br>$\pm 0.060$  | 0.538<br>$\pm 0.039$  | <b>0.566</b><br>$\pm 0.068$ | 0.467<br>$\pm 0.052$  | 0.537<br>$\pm 0.067$                             | 0.512<br>$\pm 0.050$                             | 0.456<br>$\pm 0.039$        | 0.468<br>$\pm 0.038$        | $\begin{matrix} 0.561 \\ \pm 0.030 \end{matrix}$ | 0.560<br>$\pm 0.082$  | 0.509<br>$\pm 0.021$  | 0.454<br>$\pm 0.043$  | 0.502<br>$\pm 0.026$  | 0.456<br>$\pm 0.048$  | 0.527<br>$\pm 0.074$  | 0.492<br>$\pm 0.064$  |
|               | BAcc     | <b>0.317</b><br>$\pm 0.089$                      | 0.304<br>$\pm 0.076$        | 0.279<br>$\pm 0.024$        | 0.292<br>$\pm 0.064$                             | 0.242<br>$\pm 0.089$  | 0.279<br>$\pm 0.032$  | 0.275<br>$\pm 0.063$        | 0.200<br>$\pm 0.064$  | 0.271<br>$\pm 0.051$                             | 0.275<br>$\pm 0.054$                             | 0.221<br>$\pm 0.067$        | 0.208<br>$\pm 0.051$        | $\begin{matrix} 0.346 \\ \pm 0.046 \end{matrix}$ | 0.279<br>$\pm 0.058$  | 0.233<br>$\pm 0.017$  | 0.192<br>$\pm 0.009$  | 0.250<br>$\pm 0.042$  | 0.242<br>$\pm 0.073$  | 0.287<br>$\pm 0.081$  | 0.225<br>$\pm 0.037$  |
|               | Acc.1    | <b>0.317</b><br>$\pm 0.089$                      | 0.304<br>$\pm 0.076$        | 0.279<br>$\pm 0.024$        | 0.292<br>$\pm 0.064$                             | 0.242<br>$\pm 0.089$  | 0.279<br>$\pm 0.032$  | 0.275<br>$\pm 0.063$        | 0.200<br>$\pm 0.064$  | 0.271<br>$\pm 0.051$                             | 0.275<br>$\pm 0.054$                             | 0.221<br>$\pm 0.067$        | 0.208<br>$\pm 0.051$        | $\begin{matrix} 0.346 \\ \pm 0.046 \end{matrix}$ | 0.275<br>$\pm 0.058$  | 0.233<br>$\pm 0.017$  | 0.192<br>$\pm 0.009$  | 0.250<br>$\pm 0.042$  | 0.237<br>$\pm 0.079$  | 0.300<br>$\pm 0.093$  | 0.225<br>$\pm 0.037$  |

Continued on next page

| SubjectMetric |          | DeepConvnet                    | EEGNet                         | Conformer         | CTNet                          | BIOT (f)          | BIOT (l)          | BENDR (f)                      | BENDR (l)         | CBraMod (f)                    | CBraMod (l)      | EEGPT (f)         | EEGPT (l)         | LaBraM (f)                     | LaBraM (l)                     | STEEGformer-s (f) | STEEGformer-s (l) | STEEGformer-b (f) | STEEGformer-b (l) | STEEGformer-h (f)              | STEEGformer-h (l) |
|---------------|----------|--------------------------------|--------------------------------|-------------------|--------------------------------|-------------------|-------------------|--------------------------------|-------------------|--------------------------------|------------------|-------------------|-------------------|--------------------------------|--------------------------------|-------------------|-------------------|-------------------|-------------------|--------------------------------|-------------------|
| sub3          | Acc.2    | 0.596<br>± 0.098               | 0.567<br>± 0.048               | 0.525<br>± 0.048  | 0.525<br>± 0.076               | 0.500<br>± 0.078  | 0.525<br>± 0.061  | 0.533<br>± 0.098               | 0.454<br>± 0.104  | 0.558<br>± 0.113               | 0.533<br>± 0.060 | 0.408<br>± 0.068  | 0.496<br>± 0.040  | 0.508<br>± 0.019               | <b>0.575</b><br>± <b>0.054</b> | 0.508<br>± 0.011  | 0.467<br>± 0.067  | 0.542<br>± 0.042  | 0.475<br>± 0.061  | 0.516<br>± 0.116               | 0.471<br>± 0.054  |
|               | $\kappa$ | 0.007<br>± 0.096               | <b>0.052</b><br>± <b>0.100</b> | -0.022<br>± 0.042 | -0.007<br>± 0.092              | -0.007<br>± 0.080 | -0.096<br>± 0.050 | <b>0.052</b><br>± <b>0.081</b> | -0.074<br>± 0.128 | 0.119<br>± 0.084               | 0.044<br>± 0.151 | -0.067<br>± 0.066 | -0.007<br>± 0.112 | -0.044<br>± 0.099              | 0.022<br>± 0.125               | -0.052<br>± 0.133 | -0.059<br>± 0.033 | -0.044<br>± 0.071 | 0.007<br>± 0.088  | 0.044<br>± 0.066               | -0.015<br>± 0.093 |
|               | AUC      | 0.496<br>± 0.101               | 0.549<br>± 0.092               | 0.490<br>± 0.068  | 0.545<br>± 0.081               | 0.506<br>± 0.067  | 0.467<br>± 0.053  | 0.507<br>± 0.040               | 0.478<br>± 0.067  | <b>0.545</b><br>± <b>0.060</b> | 0.508<br>± 0.088 | 0.487<br>± 0.043  | 0.508<br>± 0.049  | 0.499<br>± 0.047               | 0.509<br>± 0.060               | 0.479<br>± 0.068  | 0.493<br>± 0.031  | 0.459<br>± 0.055  | 0.500<br>± 0.045  | 0.516<br>± 0.044               | 0.456<br>± 0.038  |
|               | BAcc     | 0.256<br>± 0.072               | <b>0.289</b><br>± <b>0.075</b> | 0.233<br>± 0.032  | 0.244<br>± 0.069               | 0.244<br>± 0.060  | 0.178<br>± 0.037  | <b>0.289</b><br>± <b>0.061</b> | 0.194<br>± 0.096  | 0.339<br>± 0.063               | 0.283<br>± 0.114 | 0.200<br>± 0.050  | 0.244<br>± 0.084  | 0.217<br>± 0.075               | 0.267<br>± 0.093               | 0.211<br>± 0.099  | 0.206<br>± 0.025  | 0.217<br>± 0.053  | 0.256<br>± 0.066  | 0.283<br>± 0.050               | 0.239<br>± 0.070  |
|               | Acc.1    | 0.256<br>± 0.072               | 0.289<br>± 0.075               | 0.233<br>± 0.032  | 0.244<br>± 0.069               | 0.244<br>± 0.060  | 0.178<br>± 0.037  | 0.289<br>± 0.061               | 0.194<br>± 0.096  | 0.339<br>± 0.063               | 0.283<br>± 0.114 | 0.200<br>± 0.050  | 0.244<br>± 0.084  | 0.217<br>± 0.075               | 0.261<br>± 0.101               | 0.211<br>± 0.099  | 0.206<br>± 0.025  | 0.217<br>± 0.053  | 0.256<br>± 0.066  | <b>0.291</b><br>± <b>0.075</b> | 0.239<br>± 0.070  |
|               | Acc.2    | 0.461<br>± 0.105               | 0.533<br>± 0.120               | 0.494<br>± 0.053  | 0.567<br>± 0.144               | 0.467<br>± 0.087  | 0.478<br>± 0.093  | 0.500<br>± 0.071               | 0.450<br>± 0.082  | 0.539<br>± 0.075               | 0.472<br>± 0.119 | 0.506<br>± 0.060  | 0.511<br>± 0.087  | <b>0.556</b><br>± <b>0.044</b> | 0.539<br>± 0.099               | 0.417<br>± 0.086  | 0.494<br>± 0.053  | 0.489<br>± 0.050  | 0.533<br>± 0.012  | 0.500<br>± 0.100               | 0.461<br>± 0.080  |
| sub4          | $\kappa$ | 0.067<br>± 0.046               | 0.078<br>± 0.023               | 0.100<br>± 0.067  | <b>0.128</b><br>± <b>0.130</b> | -0.072<br>± 0.050 | -0.017<br>± 0.064 | 0.056<br>± 0.083               | 0.022<br>± 0.060  | 0.172<br>± 0.046               | 0.033<br>± 0.053 | 0.011<br>± 0.082  | 0.044<br>± 0.058  | -0.006<br>± 0.120              | 0.067<br>± 0.101               | -0.006<br>± 0.060 | -0.044<br>± 0.091 | 0.039<br>± 0.105  | 0.017<br>± 0.070  | 0.067<br>± 0.133               | 0.017<br>± 0.061  |
|               | AUC      | 0.592<br>± 0.038               | 0.560<br>± 0.041               | 0.562<br>± 0.051  | 0.603<br>± 0.061               | 0.443<br>± 0.014  | 0.470<br>± 0.017  | 0.548<br>± 0.044               | 0.511<br>± 0.055  | <b>0.599</b><br>± <b>0.046</b> | 0.550<br>± 0.035 | 0.521<br>± 0.073  | 0.554<br>± 0.056  | 0.492<br>± 0.048               | 0.539<br>± 0.089               | 0.529<br>± 0.064  | 0.496<br>± 0.060  | 0.523<br>± 0.049  | 0.514<br>± 0.036  | 0.534<br>± 0.074               | 0.479<br>± 0.071  |
|               | BAcc     | 0.300<br>± 0.035               | 0.308<br>± 0.017               | 0.325<br>± 0.050  | <b>0.346</b><br>± <b>0.097</b> | 0.196<br>± 0.038  | 0.237<br>± 0.048  | 0.292<br>± 0.062               | 0.267<br>± 0.045  | 0.379<br>± 0.034               | 0.275<br>± 0.040 | 0.258<br>± 0.062  | 0.283<br>± 0.043  | 0.246<br>± 0.090               | 0.300<br>± 0.076               | 0.246<br>± 0.045  | 0.217<br>± 0.068  | 0.279<br>± 0.079  | 0.263<br>± 0.052  | 0.300<br>± 0.099               | 0.263<br>± 0.046  |
|               | Acc.1    | 0.300<br>± 0.035               | 0.308<br>± 0.017               | 0.325<br>± 0.050  | <b>0.346</b><br>± <b>0.097</b> | 0.196<br>± 0.038  | 0.237<br>± 0.048  | 0.292<br>± 0.063               | 0.267<br>± 0.045  | 0.379<br>± 0.034               | 0.275<br>± 0.040 | 0.258<br>± 0.062  | 0.283<br>± 0.043  | 0.246<br>± 0.090               | 0.300<br>± 0.076               | 0.246<br>± 0.045  | 0.217<br>± 0.068  | 0.279<br>± 0.079  | 0.263<br>± 0.052  | 0.297<br>± 0.106               | 0.263<br>± 0.046  |
|               | Acc.2    | <b>0.617</b><br>± <b>0.076</b> | 0.550<br>± 0.043               | 0.604<br>± 0.079  | 0.621<br>± 0.048               | 0.458<br>± 0.074  | 0.429<br>± 0.043  | 0.537<br>± 0.065               | 0.512<br>± 0.041  | 0.596<br>± 0.043               | 0.529<br>± 0.072 | 0.492<br>± 0.085  | 0.554<br>± 0.068  | 0.500<br>± 0.049               | 0.529<br>± 0.126               | 0.579<br>± 0.063  | 0.479<br>± 0.059  | 0.521<br>± 0.075  | 0.508<br>± 0.097  | 0.588<br>± 0.093               | 0.479<br>± 0.053  |
| sub5          | $\kappa$ | 0.050<br>± 0.072               | <b>0.117</b><br>± <b>0.103</b> | 0.056<br>± 0.119  | 0.133<br>± 0.123               | -0.022<br>± 0.036 | 0.028<br>± 0.081  | 0.050<br>± 0.082               | 0.011<br>± 0.080  | 0.072<br>± 0.054               | 0.056<br>± 0.065 | 0.061<br>± 0.108  | 0.039<br>± 0.122  | -0.011<br>± 0.112              | 0.017<br>± 0.159               | 0.072<br>± 0.058  | 0.028<br>± 0.056  | 0.044<br>± 0.171  | 0.056<br>± 0.071  | -0.028<br>± 0.102              | 0.006<br>± 0.084  |
|               | AUC      | 0.569<br>± 0.049               | <b>0.580</b><br>± <b>0.085</b> | 0.573<br>± 0.065  | 0.589<br>± 0.074               | 0.475<br>± 0.041  | 0.490<br>± 0.085  | 0.547<br>± 0.068               | 0.531<br>± 0.030  | 0.556<br>± 0.043               | 0.540<br>± 0.031 | 0.540<br>± 0.070  | 0.537<br>± 0.087  | 0.492<br>± 0.062               | 0.515<br>± 0.063               | 0.546<br>± 0.067  | 0.501<br>± 0.039  | 0.528<br>± 0.084  | 0.500<br>± 0.032  | 0.518<br>± 0.055               | 0.475<br>± 0.048  |
|               | BAcc     | 0.287<br>± 0.054               | <b>0.338</b><br>± <b>0.077</b> | 0.292<br>± 0.090  | 0.350<br>± 0.092               | 0.233<br>± 0.027  | 0.271<br>± 0.061  | 0.287<br>± 0.061               | 0.258<br>± 0.060  | 0.304<br>± 0.041               | 0.292<br>± 0.049 | 0.296<br>± 0.081  | 0.279<br>± 0.092  | 0.242<br>± 0.084               | 0.263<br>± 0.119               | 0.304<br>± 0.043  | 0.271<br>± 0.042  | 0.283<br>± 0.128  | 0.292<br>± 0.053  | 0.229<br>± 0.077               | 0.254<br>± 0.063  |
|               | Acc.1    | 0.287<br>± 0.054               | <b>0.338</b><br>± <b>0.077</b> | 0.292<br>± 0.090  | 0.350<br>± 0.092               | 0.233<br>± 0.027  | 0.271<br>± 0.061  | 0.287<br>± 0.061               | 0.258<br>± 0.060  | 0.304<br>± 0.041               | 0.292<br>± 0.049 | 0.296<br>± 0.081  | 0.279<br>± 0.092  | 0.242<br>± 0.084               | 0.263<br>± 0.119               | 0.304<br>± 0.043  | 0.271<br>± 0.042  | 0.283<br>± 0.128  | 0.296<br>± 0.052  | 0.222<br>± 0.079               | 0.254<br>± 0.063  |
|               | Acc.2    | 0.287<br>± 0.054               | <b>0.338</b><br>± <b>0.077</b> | 0.292<br>± 0.090  | 0.350<br>± 0.092               | 0.233<br>± 0.027  | 0.271<br>± 0.061  | 0.287<br>± 0.061               | 0.258<br>± 0.060  | 0.304<br>± 0.041               | 0.292<br>± 0.049 | 0.296<br>± 0.081  | 0.279<br>± 0.092  | 0.242<br>± 0.084               | 0.263<br>± 0.119               | 0.304<br>± 0.043  | 0.271<br>± 0.042  | 0.283<br>± 0.128  | 0.296<br>± 0.052  | 0.222<br>± 0.079               | 0.254<br>± 0.063  |

Continued on next page



| Subject | Metric   | DeepConvnet     | EEGNet          | Conformer       | CTNet           | BIOT (f)         | BIOT (l)         | BENDR (f)       | BENDR (l)       | CBraMod (f)     | CBraMod (l)     | EEGPT (f)        | EEGPT (l)       | LaBraM (f)       | LaBraM (l)       | STEEGformer-s (f) | STEEGformer-s (l) | STEEGformer-b (f) | STEEGformer-b (l) | STEEGformer-h (f) | STEEGformer-h (l) |
|---------|----------|-----------------|-----------------|-----------------|-----------------|------------------|------------------|-----------------|-----------------|-----------------|-----------------|------------------|-----------------|------------------|------------------|-------------------|-------------------|-------------------|-------------------|-------------------|-------------------|
|         |          | 0.567<br>±0.061 | 0.600<br>±0.121 | 0.600<br>±0.060 | 0.575<br>±0.072 | 0.529<br>±0.079  | 0.500<br>±0.069  | 0.554<br>±0.062 | 0.542<br>±0.042 | 0.529<br>±0.032 | 0.533<br>±0.067 | 0.521<br>±0.062  | 0.508<br>±0.107 | 0.479<br>±0.082  | 0.508<br>±0.041  | 0.554<br>±0.081   | 0.500<br>±0.074   | 0.512<br>±0.107   | 0.504<br>±0.060   | 0.522<br>±0.032   | 0.483<br>±0.092   |
| sub6    | $\kappa$ | 0.041<br>±0.113 | 0.061<br>±0.092 | 0.092<br>±0.105 | 0.050<br>±0.114 | -0.008<br>±0.074 | 0.005<br>±0.096  | 0.068<br>±0.090 | 0.019<br>±0.073 | 0.036<br>±0.054 | 0.015<br>±0.072 | 0.030<br>±0.087  | 0.067<br>±0.072 | 0.007<br>±0.091  | 0.001<br>±0.081  | 0.037<br>±0.105   | 0.000<br>±0.053   | 0.025<br>±0.048   | 0.010<br>±0.046   | -0.050<br>±0.044  | -0.028<br>±0.098  |
|         | AUC      | 0.514<br>±0.071 | 0.530<br>±0.084 | 0.552<br>±0.056 | 0.536<br>±0.071 | 0.504<br>±0.028  | 0.492<br>±0.076  | 0.521<br>±0.050 | 0.517<br>±0.070 | 0.512<br>±0.040 | 0.527<br>±0.027 | 0.527<br>±0.063  | 0.560<br>±0.048 | 0.531<br>±0.086  | 0.485<br>±0.048  | 0.525<br>±0.065   | 0.518<br>±0.055   | 0.530<br>±0.036   | 0.538<br>±0.023   | 0.475<br>±0.040   | 0.503<br>±0.047   |
|         | BAcc     | 0.280<br>±0.086 | 0.294<br>±0.071 | 0.320<br>±0.077 | 0.288<br>±0.086 | 0.244<br>±0.055  | 0.255<br>±0.071  | 0.301<br>±0.067 | 0.263<br>±0.057 | 0.277<br>±0.040 | 0.262<br>±0.054 | 0.271<br>±0.066  | 0.301<br>±0.055 | 0.256<br>±0.070  | 0.251<br>±0.062  | 0.278<br>±0.077   | 0.250<br>±0.040   | 0.269<br>±0.036   | 0.257<br>±0.033   | 0.212<br>±0.034   | 0.230<br>±0.076   |
|         | Acc.1    | 0.282<br>±0.086 | 0.296<br>±0.070 | 0.320<br>±0.079 | 0.287<br>±0.083 | 0.245<br>±0.055  | 0.254<br>±0.072  | 0.301<br>±0.067 | 0.264<br>±0.056 | 0.278<br>±0.042 | 0.259<br>±0.056 | 0.273<br>±0.066  | 0.301<br>±0.053 | 0.255<br>±0.068  | 0.250<br>±0.062  | 0.278<br>±0.079   | 0.250<br>±0.040   | 0.269<br>±0.037   | 0.255<br>±0.038   | 0.188<br>±0.037   | 0.227<br>±0.076   |
|         | Acc.2    | 0.482<br>±0.060 | 0.523<br>±0.104 | 0.551<br>±0.054 | 0.532<br>±0.077 | 0.481<br>±0.078  | 0.472<br>±0.091  | 0.524<br>±0.080 | 0.513<br>±0.124 | 0.519<br>±0.063 | 0.518<br>±0.046 | 0.542<br>±0.096  | 0.565<br>±0.062 | 0.528<br>±0.094  | 0.523<br>±0.026  | 0.528<br>±0.046   | 0.505<br>±0.086   | 0.481<br>±0.054   | 0.500<br>±0.030   | 0.484<br>±0.119   | 0.486<br>±0.070   |
|         | $\kappa$ | 0.022<br>±0.046 | 0.044<br>±0.058 | 0.033<br>±0.080 | 0.067<br>±0.107 | -0.011<br>±0.064 | -0.022<br>±0.087 | 0.011<br>±0.058 | 0.017<br>±0.082 | 0.089<br>±0.069 | 0.072<br>±0.037 | -0.039<br>±0.050 | 0.033<br>±0.053 | 0.017<br>±0.061  | -0.056<br>±0.071 | -0.050<br>±0.072  | 0.000<br>±0.059   | 0.011<br>±0.105   | -0.039<br>±0.046  | 0.033<br>±0.077   | -0.022<br>±0.072  |
| sub7    | AUC      | 0.567<br>±0.055 | 0.565<br>±0.044 | 0.528<br>±0.065 | 0.546<br>±0.058 | 0.531<br>±0.033  | 0.475<br>±0.058  | 0.543<br>±0.030 | 0.540<br>±0.063 | 0.583<br>±0.046 | 0.541<br>±0.044 | 0.445<br>±0.043  | 0.534<br>±0.036 | 0.470<br>±0.047  | 0.475<br>±0.062  | 0.496<br>±0.058   | 0.474<br>±0.066   | 0.491<br>±0.036   | 0.487<br>±0.061   | 0.534<br>±0.050   | 0.433<br>±0.016   |
|         | BAcc     | 0.267<br>±0.034 | 0.283<br>±0.043 | 0.275<br>±0.060 | 0.300<br>±0.080 | 0.242<br>±0.048  | 0.233<br>±0.065  | 0.258<br>±0.043 | 0.263<br>±0.062 | 0.317<br>±0.052 | 0.304<br>±0.028 | 0.221<br>±0.038  | 0.275<br>±0.040 | 0.263<br>±0.046  | 0.208<br>±0.053  | 0.212<br>±0.054   | 0.250<br>±0.044   | 0.258<br>±0.079   | 0.221<br>±0.035   | 0.275<br>±0.058   | 0.233<br>±0.054   |
|         | Acc.1    | 0.267<br>±0.034 | 0.283<br>±0.043 | 0.275<br>±0.060 | 0.300<br>±0.080 | 0.242<br>±0.048  | 0.233<br>±0.065  | 0.258<br>±0.043 | 0.263<br>±0.062 | 0.317<br>±0.052 | 0.304<br>±0.028 | 0.221<br>±0.038  | 0.275<br>±0.040 | 0.263<br>±0.046  | 0.208<br>±0.053  | 0.208<br>±0.049   | 0.250<br>±0.044   | 0.258<br>±0.079   | 0.221<br>±0.035   | 0.291<br>±0.056   | 0.233<br>±0.054   |
|         | Acc.2    | 0.588<br>±0.070 | 0.608<br>±0.045 | 0.567<br>±0.090 | 0.558<br>±0.074 | 0.508<br>±0.070  | 0.508<br>±0.084  | 0.533<br>±0.084 | 0.525<br>±0.095 | 0.575<br>±0.073 | 0.500<br>±0.053 | 0.450<br>±0.068  | 0.558<br>±0.058 | 0.487<br>±0.064  | 0.463<br>±0.045  | 0.525<br>±0.099   | 0.508<br>±0.067   | 0.483<br>±0.050   | 0.508<br>±0.102   | 0.525<br>±0.042   | 0.454<br>±0.061   |
|         | $\kappa$ | 0.100<br>±0.033 | 0.047<br>±0.107 | 0.080<br>±0.135 | 0.080<br>±0.107 | 0.007<br>±0.119  | -0.047<br>±0.112 | 0.087<br>±0.090 | 0.047<br>±0.065 | 0.147<br>±0.087 | 0.093<br>±0.114 | 0.000<br>±0.122  | 0.027<br>±0.028 | -0.013<br>±0.073 | 0.033<br>±0.100  | 0.047<br>±0.176   | -0.020<br>±0.069  | 0.020<br>±0.122   | 0.047<br>±0.084   | 0.047<br>±0.090   | -0.020<br>±0.018  |
|         | AUC      | 0.622<br>±0.045 | 0.578<br>±0.036 | 0.592<br>±0.086 | 0.621<br>±0.054 | 0.516<br>±0.058  | 0.505<br>±0.069  | 0.568<br>±0.041 | 0.530<br>±0.044 | 0.621<br>±0.035 | 0.603<br>±0.083 | 0.486<br>±0.069  | 0.548<br>±0.049 | 0.519<br>±0.039  | 0.533<br>±0.040  | 0.551<br>±0.097   | 0.495<br>±0.080   | 0.541<br>±0.082   | 0.506<br>±0.059   | 0.538<br>±0.056   | 0.478<br>±0.060   |
| sub8    | BAcc     | 0.325<br>±0.025 | 0.285<br>±0.080 | 0.310<br>±0.101 | 0.310<br>±0.080 | 0.255<br>±0.089  | 0.215<br>±0.084  | 0.315<br>±0.068 | 0.285<br>±0.049 | 0.360<br>±0.065 | 0.320<br>±0.086 | 0.250<br>±0.092  | 0.270<br>±0.021 | 0.240<br>±0.055  | 0.275<br>±0.075  | 0.285<br>±0.132   | 0.235<br>±0.052   | 0.265<br>±0.091   | 0.285<br>±0.063   | 0.285<br>±0.068   | 0.235<br>±0.014   |
|         | Acc.1    | 0.325<br>±0.025 | 0.285<br>±0.080 | 0.310<br>±0.101 | 0.310<br>±0.080 | 0.255<br>±0.089  | 0.215<br>±0.084  | 0.315<br>±0.068 | 0.285<br>±0.049 | 0.360<br>±0.065 | 0.320<br>±0.086 | 0.250<br>±0.092  | 0.270<br>±0.021 | 0.240<br>±0.055  | 0.275<br>±0.075  | 0.285<br>±0.132   | 0.230<br>±0.054   | 0.265<br>±0.091   | 0.285<br>±0.063   | 0.263<br>±0.080   | 0.235<br>±0.014   |
|         | Acc.2    | 0.325<br>±0.025 | 0.285<br>±0.080 | 0.310<br>±0.101 | 0.310<br>±0.080 | 0.255<br>±0.089  | 0.215<br>±0.084  | 0.315<br>±0.068 | 0.285<br>±0.049 | 0.360<br>±0.065 | 0.320<br>±0.086 | 0.250<br>±0.092  | 0.270<br>±0.021 | 0.240<br>±0.055  | 0.275<br>±0.075  | 0.285<br>±0.132   | 0.230<br>±0.054   | 0.265<br>±0.091   | 0.285<br>±0.063   | 0.263<br>±0.080   | 0.235<br>±0.014   |

Continued on next page

| SubjectMetric |          | DeepConvnet      | EEGNet           | Conformer                      | CTNet                          | BIOT (f)        | BIOT (l)         | BENDR (f)        | BENDR (l)       | CBraMod (f)     | CBraMod (l)     | EEGPT (f)        | EEGPT (l)                      | LaBraM (f)       | LaBraM (l)      | STEEGformer-s   | STEEGformer-s   | STEEGformer-b   | STEEGformer-b   | STEEGformer-l                  | STEEGformer-l   |
|---------------|----------|------------------|------------------|--------------------------------|--------------------------------|-----------------|------------------|------------------|-----------------|-----------------|-----------------|------------------|--------------------------------|------------------|-----------------|-----------------|-----------------|-----------------|-----------------|--------------------------------|-----------------|
| sub9          | Acc.2    | 0.625<br>± 0.053 | 0.600<br>±0.061  | 0.605<br>±0.084                | 0.600<br>±0.077                | 0.535<br>±0.065 | 0.500<br>±0.077  | 0.540<br>±0.076  | 0.520<br>±0.078 | 0.605<br>±0.048 | 0.600<br>±0.059 | 0.510<br>±0.060  | <b>0.610</b><br>± <b>0.076</b> | 0.490<br>±0.108  | 0.530<br>±0.037 | 0.590<br>±0.129 | 0.485<br>±0.014 | 0.495<br>±0.065 | 0.490<br>±0.065 | 0.481<br>±0.068                | 0.470<br>±0.072 |
|               | $\kappa$ | 0.039<br>±0.072  | -0.011<br>±0.070 | <b>0.106</b><br>± <b>0.036</b> | 0.033<br>±0.108                | 0.017<br>±0.109 | 0.094<br>±0.133  | 0.117<br>± 0.057 | 0.089<br>±0.110 | 0.050<br>±0.101 | 0.083<br>±0.092 | -0.061<br>±0.053 | 0.050<br>±0.123                | -0.039<br>±0.072 | 0.033<br>±0.057 | 0.044<br>±0.112 | 0.044<br>±0.058 | 0.022<br>±0.075 | 0.050<br>±0.084 | 0.078<br>±0.077                | 0.033<br>±0.093 |
|               | AUC      | 0.544<br>±0.048  | 0.509<br>±0.031  | 0.571<br>± 0.032               | <b>0.561</b><br>± <b>0.058</b> | 0.527<br>±0.056 | 0.548<br>±0.076  | 0.557<br>±0.021  | 0.556<br>±0.092 | 0.547<br>±0.061 | 0.544<br>±0.039 | 0.478<br>±0.075  | 0.539<br>±0.088                | 0.484<br>±0.039  | 0.533<br>±0.070 | 0.514<br>±0.026 | 0.528<br>±0.074 | 0.500<br>±0.041 | 0.518<br>±0.067 | 0.539<br>±0.032                | 0.549<br>±0.077 |
|               | BAcc     | 0.279<br>±0.054  | 0.242<br>±0.052  | <b>0.329</b><br>± <b>0.027</b> | 0.275<br>±0.081                | 0.263<br>±0.081 | 0.321<br>±0.099  | 0.338<br>± 0.043 | 0.317<br>±0.083 | 0.287<br>±0.076 | 0.312<br>±0.069 | 0.204<br>±0.040  | 0.287<br>±0.092                | 0.221<br>±0.054  | 0.275<br>±0.043 | 0.283<br>±0.084 | 0.283<br>±0.043 | 0.267<br>±0.056 | 0.287<br>±0.063 | 0.308<br>±0.058                | 0.275<br>±0.070 |
|               | Acc.1    | 0.279<br>±0.054  | 0.242<br>±0.052  | <b>0.329</b><br>± <b>0.027</b> | 0.275<br>±0.081                | 0.263<br>±0.081 | 0.321<br>±0.099  | 0.338<br>± 0.043 | 0.317<br>±0.083 | 0.287<br>±0.076 | 0.312<br>±0.069 | 0.204<br>±0.040  | 0.287<br>±0.092                | 0.221<br>±0.054  | 0.279<br>±0.048 | 0.283<br>±0.084 | 0.283<br>±0.043 | 0.267<br>±0.056 | 0.287<br>±0.063 | 0.300<br>±0.068                | 0.279<br>±0.072 |
|               | Acc.2    | 0.558<br>±0.080  | 0.517<br>±0.076  | 0.546<br>±0.037                | 0.571<br>±0.089                | 0.546<br>±0.063 | 0.583<br>± 0.093 | 0.567<br>±0.060  | 0.571<br>±0.094 | 0.537<br>±0.071 | 0.550<br>±0.056 | 0.492<br>±0.094  | 0.546<br>±0.101                | 0.496<br>±0.068  | 0.525<br>±0.037 | 0.512<br>±0.035 | 0.537<br>±0.111 | 0.504<br>±0.081 | 0.525<br>±0.104 | <b>0.575</b><br>± <b>0.080</b> | 0.554<br>±0.032 |
|               |          |                  |                  |                                |                                |                 |                  |                  |                 |                 |                 |                  |                                |                  |                 |                 |                 |                 |                 |                                |                 |
|               |          |                  |                  |                                |                                |                 |                  |                  |                 |                 |                 |                  |                                |                  |                 |                 |                 |                 |                 |                                |                 |
|               |          |                  |                  |                                |                                |                 |                  |                  |                 |                 |                 |                  |                                |                  |                 |                 |                 |                 |                 |                                |                 |
|               |          |                  |                  |                                |                                |                 |                  |                  |                 |                 |                 |                  |                                |                  |                 |                 |                 |                 |                 |                                |                 |

4203  
4204  
4205  
4206  
4207  
4208  
4209  
4210  
4211  
4212  
4213  
4214  
4215  
4216  
4217  
4218  
4219  
4220  
4221  
4222  
4223  
4224  
4225  
4226  
4227  
4228  
4229  
4230  
4231  
4232  
4233  
4234  
4235

## E.2 PER-SUBJECT RESULTS

## E.2.1 WITHIN-SUBJECT EVALUATION

Table 41: Average "Self" Performance Across All Subjects

| Model (Training strategy) | $\kappa$     | AUC          | BAcc         | Acc.1        | Acc.2        |
|---------------------------|--------------|--------------|--------------|--------------|--------------|
|                           | 0.038        | 0.538        | 0.279        | 0.279        | 0.527        |
| <b>DeepConvnet</b>        | $\pm 0.030$  | $\pm 0.020$  | $\pm 0.022$  | $\pm 0.022$  | $\pm 0.030$  |
|                           | 0.043        | 0.538        | 0.282        | 0.282        | 0.531        |
| <b>EEGNet</b>             | $\pm 0.036$  | $\pm 0.029$  | $\pm 0.027$  | $\pm 0.027$  | $\pm 0.034$  |
|                           | 0.048        | <b>0.546</b> | 0.286        | 0.286        | 0.544        |
| <b>Conformer</b>          | $\pm 0.045$  | $\pm 0.026$  | $\pm 0.034$  | $\pm 0.034$  | $\pm 0.020$  |
|                           | <b>0.047</b> | 0.553        | <b>0.285</b> | <b>0.285</b> | 0.552        |
| <b>CTNet</b>              | $\pm 0.060$  | $\pm 0.038$  | $\pm 0.045$  | $\pm 0.045$  | $\pm 0.040$  |
|                           | 0.026        | 0.508        | 0.269        | 0.269        | 0.498        |
| <b>BIOT (f)</b>           | $\pm 0.038$  | $\pm 0.023$  | $\pm 0.028$  | $\pm 0.028$  | $\pm 0.031$  |
|                           | -0.013       | 0.491        | 0.240        | 0.240        | 0.484        |
| <b>BIOT (l)</b>           | $\pm 0.038$  | $\pm 0.023$  | $\pm 0.028$  | $\pm 0.028$  | $\pm 0.041$  |
|                           | 0.032        | 0.527        | 0.274        | 0.275        | 0.534        |
| <b>BENDR (f)</b>          | $\pm 0.043$  | $\pm 0.026$  | $\pm 0.033$  | $\pm 0.033$  | $\pm 0.030$  |
|                           | 0.024        | 0.520        | 0.268        | 0.268        | 0.515        |
| <b>BENDR (l)</b>          | $\pm 0.038$  | $\pm 0.018$  | $\pm 0.028$  | $\pm 0.027$  | $\pm 0.037$  |
|                           | 0.030        | 0.539        | 0.272        | 0.272        | <b>0.550</b> |
| <b>CBraMod (f)</b>        | $\pm 0.067$  | $\pm 0.054$  | $\pm 0.051$  | $\pm 0.050$  | $\pm 0.060$  |
|                           | 0.020        | 0.529        | 0.265        | 0.265        | 0.518        |
| <b>CBraMod (l)</b>        | $\pm 0.037$  | $\pm 0.035$  | $\pm 0.028$  | $\pm 0.028$  | $\pm 0.031$  |
|                           | 0.021        | 0.518        | 0.266        | 0.266        | 0.514        |
| <b>EEGPT (f)</b>          | $\pm 0.058$  | $\pm 0.035$  | $\pm 0.043$  | $\pm 0.043$  | $\pm 0.043$  |
|                           | 0.008        | 0.508        | 0.256        | 0.256        | 0.503        |
| <b>EEGPT (l)</b>          | $\pm 0.061$  | $\pm 0.049$  | $\pm 0.046$  | $\pm 0.046$  | $\pm 0.055$  |
|                           | -0.005       | 0.495        | 0.246        | 0.246        | 0.497        |
| <b>LaBraM (f)</b>         | $\pm 0.029$  | $\pm 0.027$  | $\pm 0.022$  | $\pm 0.022$  | $\pm 0.044$  |
|                           | -0.004       | 0.485        | 0.247        | 0.248        | 0.483        |
| <b>LaBraM (l)</b>         | $\pm 0.031$  | $\pm 0.018$  | $\pm 0.023$  | $\pm 0.023$  | $\pm 0.028$  |
|                           | 0.001        | 0.495        | 0.250        | 0.250        | 0.499        |
| <b>STEEGformer-s (f)</b>  | $\pm 0.050$  | $\pm 0.036$  | $\pm 0.038$  | $\pm 0.038$  | $\pm 0.041$  |
|                           | -0.027       | 0.469        | 0.229        | 0.230        | 0.463        |
| <b>STEEGformer-s (l)</b>  | $\pm 0.033$  | $\pm 0.034$  | $\pm 0.024$  | $\pm 0.024$  | $\pm 0.046$  |
|                           | -0.005       | 0.506        | 0.246        | 0.246        | 0.502        |
| <b>STEEGformer-b (f)</b>  | $\pm 0.044$  | $\pm 0.030$  | $\pm 0.033$  | $\pm 0.033$  | $\pm 0.039$  |
|                           | -0.023       | 0.471        | 0.233        | 0.233        | 0.482        |
| <b>STEEGformer-b (l)</b>  | $\pm 0.032$  | $\pm 0.028$  | $\pm 0.024$  | $\pm 0.024$  | $\pm 0.031$  |
|                           | 0.012        | 0.507        | 0.259        | 0.254        | 0.503        |
| <b>STEEGformer-l (f)</b>  | $\pm 0.048$  | $\pm 0.037$  | $\pm 0.036$  | $\pm 0.044$  | $\pm 0.050$  |
|                           | -0.026       | 0.473        | 0.231        | 0.231        | 0.480        |
| <b>STEEGformer-l (l)</b>  | $\pm 0.047$  | $\pm 0.039$  | $\pm 0.035$  | $\pm 0.035$  | $\pm 0.036$  |

Table 42: Per-Subject "Self" Performance (trained+tested on same subject)

| Subject | Metric   | DeepConvnet                 | EEGNet               | Conformer            | CTNet                       | BIOT (i)             | BIOT (f)              | BENDR (f)            | BENDR (f)                   | CBraMod (f)                 | CBraMod (f)                 | EEGPT (f)             | EEGPT (f)             | LaBraM (f)            | LaBraM (f)            | STEEGformer-s (f)     | STEEGformer-s (f)     | STEEGformer-b (f)     | STEEGformer-b (f)     | STEEGformer-b (f)    | STEEGformer-b (f)     |
|---------|----------|-----------------------------|----------------------|----------------------|-----------------------------|----------------------|-----------------------|----------------------|-----------------------------|-----------------------------|-----------------------------|-----------------------|-----------------------|-----------------------|-----------------------|-----------------------|-----------------------|-----------------------|-----------------------|----------------------|-----------------------|
| sub1    | $\kappa$ | <b>0.040</b><br>$\pm 0.043$ | 0.013<br>$\pm 0.145$ | 0.007<br>$\pm 0.104$ | 0.020<br>$\pm 0.112$        | 0.000<br>$\pm 0.041$ | -0.007<br>$\pm 0.072$ | 0.033<br>$\pm 0.111$ | -0.067<br>$\pm 0.041$       | -0.000<br>$\pm 0.085$       | 0.073<br>$\pm 0.132$        | -0.073<br>$\pm 0.101$ | -0.073<br>$\pm 0.068$ | -0.020<br>$\pm 0.056$ | 0.007<br>$\pm 0.104$  | 0.013<br>$\pm 0.117$  | 0.007<br>$\pm 0.116$  | -0.080<br>$\pm 0.069$ | 0.007<br>$\pm 0.072$  | 0.037<br>$\pm 0.086$ | 0.007<br>$\pm 0.049$  |
|         | AUC      | 0.538<br>$\pm 0.035$        | 0.533<br>$\pm 0.090$ | 0.521<br>$\pm 0.084$ | 0.518<br>$\pm 0.082$        | 0.466<br>$\pm 0.049$ | 0.504<br>$\pm 0.042$  | 0.504<br>$\pm 0.071$ | 0.487<br>$\pm 0.076$        | 0.498<br>$\pm 0.066$        | <b>0.537</b><br>$\pm 0.064$ | 0.466<br>$\pm 0.075$  | 0.445<br>$\pm 0.065$  | 0.515<br>$\pm 0.067$  | 0.496<br>$\pm 0.059$  | 0.485<br>$\pm 0.071$  | 0.470<br>$\pm 0.082$  | 0.445<br>$\pm 0.032$  | 0.447<br>$\pm 0.044$  | 0.529<br>$\pm 0.054$ | 0.464<br>$\pm 0.065$  |
|         | BAcc     | <b>0.280</b><br>$\pm 0.033$ | 0.260<br>$\pm 0.108$ | 0.255<br>$\pm 0.078$ | 0.265<br>$\pm 0.084$        | 0.250<br>$\pm 0.031$ | 0.245<br>$\pm 0.054$  | 0.275<br>$\pm 0.083$ | 0.200<br>$\pm 0.031$        | 0.250<br>$\pm 0.064$        | 0.305<br>$\pm 0.099$        | 0.195<br>$\pm 0.076$  | 0.195<br>$\pm 0.051$  | 0.235<br>$\pm 0.042$  | 0.255<br>$\pm 0.078$  | 0.260<br>$\pm 0.088$  | 0.255<br>$\pm 0.087$  | 0.190<br>$\pm 0.052$  | 0.255<br>$\pm 0.054$  | 0.278<br>$\pm 0.065$ | 0.255<br>$\pm 0.037$  |
|         | Acc.1    | <b>0.280</b><br>$\pm 0.033$ | 0.260<br>$\pm 0.108$ | 0.255<br>$\pm 0.078$ | 0.265<br>$\pm 0.084$        | 0.250<br>$\pm 0.031$ | 0.245<br>$\pm 0.054$  | 0.275<br>$\pm 0.083$ | 0.205<br>$\pm 0.021$        | 0.250<br>$\pm 0.064$        | 0.305<br>$\pm 0.099$        | 0.195<br>$\pm 0.076$  | 0.195<br>$\pm 0.051$  | 0.235<br>$\pm 0.042$  | 0.255<br>$\pm 0.078$  | 0.260<br>$\pm 0.088$  | 0.255<br>$\pm 0.087$  | 0.190<br>$\pm 0.052$  | 0.255<br>$\pm 0.054$  | 0.262<br>$\pm 0.095$ | 0.255<br>$\pm 0.037$  |
|         | Acc.2    | <b>0.555</b><br>$\pm 0.054$ | 0.515<br>$\pm 0.060$ | 0.530<br>$\pm 0.111$ | 0.515<br>$\pm 0.095$        | 0.430<br>$\pm 0.065$ | 0.515<br>$\pm 0.063$  | 0.535<br>$\pm 0.101$ | 0.460<br>$\pm 0.093$        | 0.510<br>$\pm 0.091$        | 0.495<br>$\pm 0.065$        | 0.455<br>$\pm 0.094$  | 0.440<br>$\pm 0.074$  | 0.590<br>$\pm 0.074$  | 0.510<br>$\pm 0.082$  | 0.480<br>$\pm 0.060$  | 0.495<br>$\pm 0.084$  | 0.415<br>$\pm 0.052$  | 0.480<br>$\pm 0.054$  | 0.488<br>$\pm 0.077$ | 0.510<br>$\pm 0.104$  |
|         | $\kappa$ | 0.050<br>$\pm 0.036$        | 0.022<br>$\pm 0.119$ | 0.067<br>$\pm 0.082$ | 0.006<br>$\pm 0.060$        | 0.033<br>$\pm 0.110$ | -0.006<br>$\pm 0.057$ | 0.011<br>$\pm 0.058$ | 0.089<br>$\pm 0.041$        | <b>0.078</b><br>$\pm 0.095$ | 0.028<br>$\pm 0.048$        | 0.050<br>$\pm 0.046$  | -0.028<br>$\pm 0.052$ | -0.017<br>$\pm 0.042$ | -0.067<br>$\pm 0.099$ | -0.006<br>$\pm 0.093$ | -0.039<br>$\pm 0.085$ | -0.017<br>$\pm 0.080$ | -0.033<br>$\pm 0.075$ | 0.089<br>$\pm 0.122$ | -0.083<br>$\pm 0.073$ |
|         | AUC      | 0.546<br>$\pm 0.040$        | 0.535<br>$\pm 0.051$ | 0.554<br>$\pm 0.032$ | <b>0.565</b><br>$\pm 0.037$ | 0.506<br>$\pm 0.080$ | 0.514<br>$\pm 0.054$  | 0.517<br>$\pm 0.053$ | 0.546<br>$\pm 0.035$        | 0.576<br>$\pm 0.058$        | 0.537<br>$\pm 0.066$        | 0.550<br>$\pm 0.024$  | 0.505<br>$\pm 0.026$  | 0.480<br>$\pm 0.037$  | 0.458<br>$\pm 0.066$  | 0.494<br>$\pm 0.079$  | 0.422<br>$\pm 0.041$  | 0.490<br>$\pm 0.059$  | 0.420<br>$\pm 0.032$  | 0.557<br>$\pm 0.057$ | 0.450<br>$\pm 0.022$  |
|         | BAcc     | 0.287<br>$\pm 0.027$        | 0.267<br>$\pm 0.089$ | 0.300<br>$\pm 0.062$ | 0.254<br>$\pm 0.045$        | 0.275<br>$\pm 0.083$ | 0.246<br>$\pm 0.043$  | 0.258<br>$\pm 0.043$ | 0.317<br>$\pm 0.031$        | <b>0.308</b><br>$\pm 0.071$ | 0.271<br>$\pm 0.036$        | 0.287<br>$\pm 0.034$  | 0.229<br>$\pm 0.039$  | 0.237<br>$\pm 0.032$  | 0.200<br>$\pm 0.075$  | 0.246<br>$\pm 0.070$  | 0.221<br>$\pm 0.064$  | 0.237<br>$\pm 0.060$  | 0.225<br>$\pm 0.056$  | 0.317<br>$\pm 0.091$ | 0.188<br>$\pm 0.055$  |
| sub10   | Acc.1    | 0.287<br>$\pm 0.027$        | 0.267<br>$\pm 0.089$ | 0.300<br>$\pm 0.062$ | 0.254<br>$\pm 0.045$        | 0.275<br>$\pm 0.083$ | 0.246<br>$\pm 0.043$  | 0.258<br>$\pm 0.043$ | <b>0.317</b><br>$\pm 0.031$ | 0.308<br>$\pm 0.071$        | 0.271<br>$\pm 0.036$        | 0.287<br>$\pm 0.034$  | 0.229<br>$\pm 0.039$  | 0.237<br>$\pm 0.032$  | 0.200<br>$\pm 0.075$  | 0.246<br>$\pm 0.070$  | 0.225<br>$\pm 0.068$  | 0.237<br>$\pm 0.060$  | 0.225<br>$\pm 0.056$  | 0.319<br>$\pm 0.118$ | 0.188<br>$\pm 0.055$  |
|         | Acc.2    | 0.525<br>$\pm 0.058$        | 0.546<br>$\pm 0.081$ | 0.571<br>$\pm 0.054$ | 0.579<br>$\pm 0.074$        | 0.537<br>$\pm 0.106$ | 0.529<br>$\pm 0.064$  | 0.508<br>$\pm 0.102$ | 0.558<br>$\pm 0.099$        | <b>0.575</b><br>$\pm 0.075$ | 0.508<br>$\pm 0.068$        | 0.533<br>$\pm 0.070$  | 0.479<br>$\pm 0.047$  | 0.496<br>$\pm 0.079$  | 0.450<br>$\pm 0.095$  | 0.492<br>$\pm 0.088$  | 0.438<br>$\pm 0.071$  | 0.504<br>$\pm 0.065$  | 0.417<br>$\pm 0.062$  | 0.569<br>$\pm 0.098$ | 0.458<br>$\pm 0.026$  |
|         | $\kappa$ | <b>0.089</b><br>$\pm 0.112$ | 0.033<br>$\pm 0.126$ | 0.033<br>$\pm 0.060$ | 0.100<br>$\pm 0.091$        | 0.044<br>$\pm 0.067$ | -0.033<br>$\pm 0.087$ | 0.044<br>$\pm 0.032$ | 0.017<br>$\pm 0.120$        | 0.039<br>$\pm 0.110$        | -0.028<br>$\pm 0.020$       | 0.022<br>$\pm 0.030$  | 0.028<br>$\pm 0.079$  | 0.011<br>$\pm 0.050$  | 0.022<br>$\pm 0.132$  | -0.039<br>$\pm 0.054$ | -0.011<br>$\pm 0.032$ | -0.039<br>$\pm 0.087$ | 0.039<br>$\pm 0.075$  | 0.056<br>$\pm 0.092$ | -0.044<br>$\pm 0.058$ |
|         | AUC      | <b>0.558</b><br>$\pm 0.043$ | 0.525<br>$\pm 0.051$ | 0.544<br>$\pm 0.029$ | 0.570<br>$\pm 0.030$        | 0.537<br>$\pm 0.070$ | 0.464<br>$\pm 0.051$  | 0.535<br>$\pm 0.022$ | 0.516<br>$\pm 0.079$        | 0.547<br>$\pm 0.059$        | 0.522<br>$\pm 0.035$        | 0.528<br>$\pm 0.015$  | 0.511<br>$\pm 0.035$  | 0.528<br>$\pm 0.040$  | 0.481<br>$\pm 0.077$  | 0.498<br>$\pm 0.045$  | 0.511<br>$\pm 0.044$  | 0.507<br>$\pm 0.051$  | 0.506<br>$\pm 0.048$  | 0.538<br>$\pm 0.053$ | 0.500<br>$\pm 0.051$  |
|         | BAcc     | <b>0.317</b><br>$\pm 0.084$ | 0.275<br>$\pm 0.095$ | 0.275<br>$\pm 0.045$ | 0.325<br>$\pm 0.068$        | 0.283<br>$\pm 0.050$ | 0.225<br>$\pm 0.065$  | 0.283<br>$\pm 0.024$ | 0.263<br>$\pm 0.090$        | 0.279<br>$\pm 0.083$        | 0.229<br>$\pm 0.015$        | 0.267<br>$\pm 0.023$  | 0.271<br>$\pm 0.059$  | 0.258<br>$\pm 0.038$  | 0.267<br>$\pm 0.099$  | 0.221<br>$\pm 0.041$  | 0.242<br>$\pm 0.024$  | 0.221<br>$\pm 0.065$  | 0.279<br>$\pm 0.056$  | 0.292<br>$\pm 0.069$ | 0.217<br>$\pm 0.043$  |
|         | Acc.1    | <b>0.317</b><br>$\pm 0.084$ | 0.275<br>$\pm 0.095$ | 0.275<br>$\pm 0.045$ | 0.325<br>$\pm 0.068$        | 0.283<br>$\pm 0.050$ | 0.225<br>$\pm 0.065$  | 0.283<br>$\pm 0.024$ | 0.263<br>$\pm 0.090$        | 0.279<br>$\pm 0.083$        | 0.229<br>$\pm 0.015$        | 0.267<br>$\pm 0.023$  | 0.271<br>$\pm 0.059$  | 0.258<br>$\pm 0.038$  | 0.267<br>$\pm 0.099$  | 0.221<br>$\pm 0.041$  | 0.242<br>$\pm 0.024$  | 0.221<br>$\pm 0.065$  | 0.279<br>$\pm 0.056$  | 0.312<br>$\pm 0.077$ | 0.217<br>$\pm 0.043$  |
|         | Acc.2    | 0.512<br>$\pm 0.052$        | 0.504<br>$\pm 0.111$ | 0.529<br>$\pm 0.050$ | 0.604<br>$\pm 0.079$        | 0.508<br>$\pm 0.093$ | 0.458<br>$\pm 0.093$  | 0.521<br>$\pm 0.026$ | 0.500<br>$\pm 0.097$        | <b>0.567</b><br>$\pm 0.058$ | 0.492<br>$\pm 0.054$        | 0.533<br>$\pm 0.011$  | 0.512<br>$\pm 0.054$  | 0.521<br>$\pm 0.057$  | 0.463<br>$\pm 0.099$  | 0.471<br>$\pm 0.075$  | 0.537<br>$\pm 0.052$  | 0.508<br>$\pm 0.048$  | 0.542<br>$\pm 0.071$  | 0.531<br>$\pm 0.016$ | 0.500<br>$\pm 0.085$  |

Continued on next page

| SubjectMetric |          | DeepConvnet           | EEGNet                      | Conformer             | CTNet                       | BIOT (f)                    | BIOT (f)                    | BENDR (f)             | BENDR (f)            | CBraMod (f)           | CBraMod (f)                 | EEGPT (f)             | EEGPT (f)                   | LaBraM (f)            | LaBraM (f)            | STEEGformer-s (f)     | STEEGformer-s (f)     | STEEGformer-b (f)     | STEEGformer-b (f)     | STEEGformer-h (f)     | STEEGformer-h (f)     |
|---------------|----------|-----------------------|-----------------------------|-----------------------|-----------------------------|-----------------------------|-----------------------------|-----------------------|----------------------|-----------------------|-----------------------------|-----------------------|-----------------------------|-----------------------|-----------------------|-----------------------|-----------------------|-----------------------|-----------------------|-----------------------|-----------------------|
| sub3          | $\kappa$ | -0.030<br>$\pm 0.147$ | -0.030<br>$\pm 0.066$       | 0.015<br>$\pm 0.100$  | -0.000<br>$\pm 0.094$       | 0.022<br>$\pm 0.056$        | <b>0.044</b><br>$\pm 0.084$ | 0.030<br>$\pm 0.103$  | 0.022<br>$\pm 0.130$ | -0.096<br>$\pm 0.085$ | 0.067<br>$\pm 0.048$        | 0.022<br>$\pm 0.072$  | -0.067<br>$\pm 0.084$       | 0.037<br>$\pm 0.087$  | -0.015<br>$\pm 0.093$ | -0.059<br>$\pm 0.107$ | -0.044<br>$\pm 0.071$ | -0.037<br>$\pm 0.059$ | -0.052<br>$\pm 0.093$ | 0.000<br>$\pm 0.111$  | 0.000<br>$\pm 0.114$  |
|               | AUC      | 0.490<br>$\pm 0.085$  | 0.480<br>$\pm 0.049$        | 0.522<br>$\pm 0.080$  | 0.509<br>$\pm 0.111$        | 0.483<br>$\pm 0.019$        | 0.533<br>$\pm 0.059$        | 0.521<br>$\pm 0.053$  | 0.498<br>$\pm 0.046$ | 0.453<br>$\pm 0.090$  | <b>0.526</b><br>$\pm 0.078$ | 0.488<br>$\pm 0.052$  | 0.430<br>$\pm 0.048$        | 0.509<br>$\pm 0.015$  | 0.477<br>$\pm 0.031$  | 0.467<br>$\pm 0.086$  | 0.484<br>$\pm 0.054$  | 0.495<br>$\pm 0.057$  | 0.473<br>$\pm 0.024$  | 0.463<br>$\pm 0.073$  | 0.481<br>$\pm 0.040$  |
|               | BAcc     | 0.228<br>$\pm 0.110$  | 0.228<br>$\pm 0.050$        | 0.261<br>$\pm 0.075$  | 0.250<br>$\pm 0.071$        | 0.267<br>$\pm 0.042$        | <b>0.283</b><br>$\pm 0.063$ | 0.272<br>$\pm 0.077$  | 0.267<br>$\pm 0.097$ | 0.178<br>$\pm 0.064$  | 0.300<br>$\pm 0.036$        | 0.267<br>$\pm 0.054$  | 0.200<br>$\pm 0.063$        | 0.278<br>$\pm 0.065$  | 0.239<br>$\pm 0.070$  | 0.206<br>$\pm 0.080$  | 0.217<br>$\pm 0.053$  | 0.222<br>$\pm 0.044$  | 0.211<br>$\pm 0.070$  | 0.250<br>$\pm 0.083$  | 0.250<br>$\pm 0.086$  |
|               | Acc_1    | 0.228<br>$\pm 0.110$  | 0.228<br>$\pm 0.050$        | 0.261<br>$\pm 0.075$  | 0.250<br>$\pm 0.071$        | 0.267<br>$\pm 0.042$        | <b>0.283</b><br>$\pm 0.063$ | 0.272<br>$\pm 0.077$  | 0.267<br>$\pm 0.097$ | 0.178<br>$\pm 0.064$  | 0.300<br>$\pm 0.036$        | 0.267<br>$\pm 0.054$  | 0.200<br>$\pm 0.063$        | 0.278<br>$\pm 0.065$  | 0.239<br>$\pm 0.070$  | 0.206<br>$\pm 0.080$  | 0.217<br>$\pm 0.050$  | 0.222<br>$\pm 0.044$  | 0.211<br>$\pm 0.070$  | 0.184<br>$\pm 0.087$  | 0.250<br>$\pm 0.086$  |
|               | Acc_2    | 0.456<br>$\pm 0.072$  | 0.478<br>$\pm 0.082$        | 0.511<br>$\pm 0.105$  | 0.478<br>$\pm 0.122$        | <b>0.517</b><br>$\pm 0.050$ | 0.528<br>$\pm 0.081$        | 0.528<br>$\pm 0.116$  | 0.483<br>$\pm 0.032$ | 0.444<br>$\pm 0.088$  | 0.511<br>$\pm 0.091$        | 0.467<br>$\pm 0.082$  | 0.411<br>$\pm 0.150$        | 0.511<br>$\pm 0.050$  | 0.478<br>$\pm 0.082$  | 0.483<br>$\pm 0.067$  | 0.483<br>$\pm 0.091$  | 0.478<br>$\pm 0.053$  | 0.489<br>$\pm 0.072$  | 0.391<br>$\pm 0.097$  | 0.494<br>$\pm 0.036$  |
| sub4          | $\kappa$ | 0.050<br>$\pm 0.066$  | 0.094<br>$\pm 0.061$        | 0.044<br>$\pm 0.072$  | 0.078<br>$\pm 0.101$        | 0.006<br>$\pm 0.089$        | -0.022<br>$\pm 0.069$       | 0.128<br>$\pm 0.025$  | 0.056<br>$\pm 0.071$ | 0.083<br>$\pm 0.086$  | 0.039<br>$\pm 0.061$        | 0.011<br>$\pm 0.089$  | <b>0.111</b><br>$\pm 0.081$ | -0.028<br>$\pm 0.065$ | 0.033<br>$\pm 0.082$  | 0.044<br>$\pm 0.116$  | -0.044<br>$\pm 0.075$ | 0.056<br>$\pm 0.083$  | -0.017<br>$\pm 0.042$ | 0.019<br>$\pm 0.052$  | -0.022<br>$\pm 0.069$ |
|               | AUC      | 0.552<br>$\pm 0.066$  | 0.558<br>$\pm 0.021$        | 0.544<br>$\pm 0.024$  | <b>0.582</b><br>$\pm 0.054$ | 0.508<br>$\pm 0.053$        | 0.468<br>$\pm 0.052$        | 0.578<br>$\pm 0.043$  | 0.539<br>$\pm 0.044$ | 0.591<br>$\pm 0.033$  | 0.548<br>$\pm 0.030$        | 0.532<br>$\pm 0.048$  | 0.553<br>$\pm 0.049$        | 0.480<br>$\pm 0.052$  | 0.498<br>$\pm 0.046$  | 0.526<br>$\pm 0.081$  | 0.441<br>$\pm 0.035$  | 0.560<br>$\pm 0.031$  | 0.473<br>$\pm 0.014$  | 0.528<br>$\pm 0.050$  | 0.468<br>$\pm 0.037$  |
|               | BAcc     | 0.287<br>$\pm 0.050$  | 0.321<br>$\pm 0.046$        | 0.283<br>$\pm 0.054$  | 0.308<br>$\pm 0.076$        | 0.254<br>$\pm 0.067$        | 0.233<br>$\pm 0.052$        | 0.346<br>$\pm 0.019$  | 0.292<br>$\pm 0.053$ | 0.312<br>$\pm 0.064$  | 0.279<br>$\pm 0.046$        | 0.258<br>$\pm 0.067$  | <b>0.333</b><br>$\pm 0.061$ | 0.229<br>$\pm 0.049$  | 0.275<br>$\pm 0.061$  | 0.283<br>$\pm 0.087$  | 0.217<br>$\pm 0.056$  | 0.292<br>$\pm 0.062$  | 0.237<br>$\pm 0.032$  | 0.264<br>$\pm 0.039$  | 0.233<br>$\pm 0.052$  |
|               | Acc_1    | 0.287<br>$\pm 0.050$  | 0.321<br>$\pm 0.046$        | 0.283<br>$\pm 0.054$  | 0.308<br>$\pm 0.076$        | 0.254<br>$\pm 0.067$        | 0.233<br>$\pm 0.052$        | 0.350<br>$\pm 0.017$  | 0.292<br>$\pm 0.053$ | 0.312<br>$\pm 0.064$  | 0.279<br>$\pm 0.046$        | 0.258<br>$\pm 0.067$  | <b>0.333</b><br>$\pm 0.061$ | 0.229<br>$\pm 0.049$  | 0.275<br>$\pm 0.061$  | 0.283<br>$\pm 0.087$  | 0.217<br>$\pm 0.056$  | 0.292<br>$\pm 0.062$  | 0.242<br>$\pm 0.024$  | 0.263<br>$\pm 0.057$  | 0.233<br>$\pm 0.052$  |
|               | Acc_2    | 0.542<br>$\pm 0.047$  | 0.550<br>$\pm 0.024$        | 0.558<br>$\pm 0.056$  | <b>0.592</b><br>$\pm 0.070$ | 0.492<br>$\pm 0.048$        | 0.404<br>$\pm 0.035$        | 0.588<br>$\pm 0.040$  | 0.571<br>$\pm 0.056$ | 0.617<br>$\pm 0.068$  | 0.550<br>$\pm 0.070$        | 0.533<br>$\pm 0.089$  | 0.529<br>$\pm 0.060$        | 0.446<br>$\pm 0.079$  | 0.487<br>$\pm 0.052$  | 0.533<br>$\pm 0.107$  | 0.446<br>$\pm 0.050$  | 0.550<br>$\pm 0.041$  | 0.500<br>$\pm 0.039$  | 0.544<br>$\pm 0.091$  | 0.475<br>$\pm 0.045$  |
| sub5          | $\kappa$ | 0.022<br>$\pm 0.046$  | <b>0.072</b><br>$\pm 0.046$ | -0.006<br>$\pm 0.103$ | 0.083<br>$\pm 0.062$        | 0.011<br>$\pm 0.082$        | -0.094<br>$\pm 0.072$       | -0.006<br>$\pm 0.036$ | 0.022<br>$\pm 0.063$ | -0.022<br>$\pm 0.060$ | -0.039<br>$\pm 0.015$       | -0.039<br>$\pm 0.064$ | -0.044<br>$\pm 0.061$       | -0.033<br>$\pm 0.077$ | 0.011<br>$\pm 0.064$  | -0.044<br>$\pm 0.093$ | -0.028<br>$\pm 0.020$ | 0.033<br>$\pm 0.036$  | 0.006<br>$\pm 0.023$  | -0.072<br>$\pm 0.097$ | -0.033<br>$\pm 0.036$ |
|               | AUC      | 0.543<br>$\pm 0.034$  | <b>0.556</b><br>$\pm 0.029$ | 0.542<br>$\pm 0.039$  | 0.572<br>$\pm 0.020$        | 0.516<br>$\pm 0.030$        | 0.464<br>$\pm 0.060$        | 0.512<br>$\pm 0.035$  | 0.538<br>$\pm 0.031$ | 0.482<br>$\pm 0.041$  | 0.470<br>$\pm 0.028$        | 0.496<br>$\pm 0.061$  | 0.474<br>$\pm 0.054$        | 0.465<br>$\pm 0.054$  | 0.496<br>$\pm 0.029$  | 0.458<br>$\pm 0.075$  | 0.473<br>$\pm 0.016$  | 0.507<br>$\pm 0.023$  | 0.470<br>$\pm 0.021$  | 0.460<br>$\pm 0.047$  | 0.465<br>$\pm 0.031$  |
|               | BAcc     | 0.267<br>$\pm 0.034$  | <b>0.304</b><br>$\pm 0.035$ | 0.246<br>$\pm 0.077$  | 0.312<br>$\pm 0.047$        | 0.258<br>$\pm 0.062$        | 0.179<br>$\pm 0.054$        | 0.246<br>$\pm 0.027$  | 0.267<br>$\pm 0.048$ | 0.233<br>$\pm 0.045$  | 0.221<br>$\pm 0.011$        | 0.221<br>$\pm 0.048$  | 0.217<br>$\pm 0.046$        | 0.225<br>$\pm 0.058$  | 0.258<br>$\pm 0.048$  | 0.217<br>$\pm 0.070$  | 0.229<br>$\pm 0.015$  | 0.275<br>$\pm 0.027$  | 0.254<br>$\pm 0.017$  | 0.196<br>$\pm 0.073$  | 0.225<br>$\pm 0.027$  |
|               | Acc_1    | 0.267<br>$\pm 0.034$  | <b>0.304</b><br>$\pm 0.035$ | 0.246<br>$\pm 0.077$  | 0.312<br>$\pm 0.047$        | 0.258<br>$\pm 0.062$        | 0.179<br>$\pm 0.054$        | 0.246<br>$\pm 0.027$  | 0.267<br>$\pm 0.048$ | 0.233<br>$\pm 0.045$  | 0.221<br>$\pm 0.011$        | 0.221<br>$\pm 0.048$  | 0.217<br>$\pm 0.046$        | 0.225<br>$\pm 0.058$  | 0.258<br>$\pm 0.048$  | 0.217<br>$\pm 0.070$  | 0.229<br>$\pm 0.015$  | 0.275<br>$\pm 0.027$  | 0.254<br>$\pm 0.017$  | 0.197<br>$\pm 0.072$  | 0.225<br>$\pm 0.027$  |
|               | Acc_2    | 0.550<br>$\pm 0.072$  | <b>0.571</b><br>$\pm 0.058$ | 0.546<br>$\pm 0.048$  | 0.592<br>$\pm 0.032$        | 0.512<br>$\pm 0.038$        | 0.521<br>$\pm 0.103$        | 0.554<br>$\pm 0.077$  | 0.525<br>$\pm 0.045$ | 0.479<br>$\pm 0.042$  | 0.479<br>$\pm 0.059$        | 0.525<br>$\pm 0.099$  | 0.467<br>$\pm 0.076$        | 0.471<br>$\pm 0.043$  | 0.496<br>$\pm 0.048$  | 0.471<br>$\pm 0.097$  | 0.417<br>$\pm 0.042$  | 0.517<br>$\pm 0.045$  | 0.483<br>$\pm 0.040$  | 0.456<br>$\pm 0.034$  | 0.450<br>$\pm 0.032$  |
| sub6          | $\kappa$ | 0.056<br>$\pm 0.156$  | 0.043<br>$\pm 0.047$        | 0.025<br>$\pm 0.054$  | -0.063<br>$\pm 0.013$       | <b>0.051</b><br>$\pm 0.036$ | -0.043<br>$\pm 0.085$       | -0.025<br>$\pm 0.058$ | 0.032<br>$\pm 0.049$ | -0.038<br>$\pm 0.073$ | 0.012<br>$\pm 0.084$        | 0.001<br>$\pm 0.081$  | 0.049<br>$\pm 0.057$        | -0.024<br>$\pm 0.084$ | -0.048<br>$\pm 0.059$ | -0.045<br>$\pm 0.104$ | -0.004<br>$\pm 0.135$ | 0.037<br>$\pm 0.063$  | -0.013<br>$\pm 0.082$ | -0.033<br>$\pm 0.153$ | -0.063<br>$\pm 0.077$ |

Continued on next page

| Subject | Metric   | DeepConvnet                    | EEGNet                         | Conformer                      | CTNet                          | BIOT (f)                       | BIOT (l)         | BENDR (f)       | BENDR (l)       | CBraMod (f)      | CBraMod (l)                    | EEGPT (f)        | EEGPT (l)                      | LaBraM (f)       | LaBraM (l)       | STEEGformer-s (f) | STEEGformer-s (l) | STEEGformer-b (f) | STEEGformer-b (l) | STEEGformer-h (f) | STEEGformer-h (l) |
|---------|----------|--------------------------------|--------------------------------|--------------------------------|--------------------------------|--------------------------------|------------------|-----------------|-----------------|------------------|--------------------------------|------------------|--------------------------------|------------------|------------------|-------------------|-------------------|-------------------|-------------------|-------------------|-------------------|
|         |          |                                |                                |                                |                                |                                |                  |                 |                 |                  |                                |                  |                                |                  |                  |                   |                   |                   |                   |                   |                   |
|         | AUC      | 0.526<br>±0.054                | 0.522<br>±0.044                | 0.517<br>±0.054                | 0.492<br>±0.035                | 0.527<br>±0.035                | 0.466<br>±0.061  | 0.485<br>±0.062 | 0.520<br>±0.051 | 0.492<br>±0.070  | <b>0.529</b><br>± <b>0.078</b> | 0.506<br>±0.030  | 0.559<br>± 0.023               | 0.468<br>±0.065  | 0.460<br>±0.032  | 0.437<br>±0.072   | 0.488<br>±0.065   | 0.508<br>±0.062   | 0.485<br>±0.047   | 0.485<br>±0.110   | 0.459<br>±0.045   |
|         | BAcc     | 0.293<br>± 0.117               | 0.280<br>±0.036                | 0.270<br>±0.039                | 0.202<br>±0.010                | <b>0.288</b><br>± <b>0.028</b> | 0.217<br>±0.064  | 0.230<br>±0.043 | 0.273<br>±0.038 | 0.221<br>±0.053  | 0.259<br>±0.063                | 0.251<br>±0.060  | 0.285<br>±0.044                | 0.232<br>±0.062  | 0.214<br>±0.046  | 0.215<br>±0.078   | 0.246<br>±0.100   | 0.277<br>±0.047   | 0.240<br>±0.061   | 0.226<br>±0.115   | 0.202<br>±0.058   |
|         | Acc.1    | 0.292<br>± 0.118               | 0.282<br>±0.035                | 0.269<br>±0.040                | 0.204<br>±0.010                | <b>0.287</b><br>± <b>0.026</b> | 0.217<br>±0.064  | 0.232<br>±0.044 | 0.273<br>±0.036 | 0.222<br>±0.055  | 0.259<br>±0.063                | 0.250<br>±0.061  | 0.287<br>±0.043                | 0.232<br>±0.063  | 0.218<br>±0.051  | 0.213<br>±0.080   | 0.245<br>±0.103   | 0.278<br>±0.047   | 0.241<br>±0.060   | 0.215<br>±0.102   | 0.203<br>±0.059   |
|         | Acc.2    | 0.495<br>±0.058                | 0.524<br>±0.064                | <b>0.547</b><br>± <b>0.104</b> | 0.519<br>±0.049                | 0.514<br>±0.029                | 0.435<br>±0.060  | 0.487<br>±0.080 | 0.542<br>±0.075 | 0.510<br>±0.084  | 0.514<br>±0.052                | 0.500<br>±0.096  | 0.574<br>± 0.042               | 0.482<br>±0.075  | 0.459<br>±0.029  | 0.435<br>±0.066   | 0.468<br>±0.107   | 0.495<br>±0.079   | 0.463<br>±0.075   | 0.501<br>±0.109   | 0.467<br>±0.058   |
| sub7    | $\kappa$ | 0.028<br>±0.034                | 0.033<br>±0.082                | 0.039<br>±0.064                | -0.006<br>±0.082               | <b>0.044</b><br>± <b>0.042</b> | -0.011<br>±0.080 | 0.011<br>±0.089 | 0.022<br>±0.107 | 0.056<br>± 0.121 | -0.022<br>±0.030               | 0.011<br>±0.093  | -0.028<br>±0.076               | -0.039<br>±0.046 | 0.028<br>±0.168  | -0.017<br>±0.058  | -0.083<br>±0.065  | -0.011<br>±0.042  | -0.072<br>±0.046  | -0.033<br>±0.053  | -0.072<br>±0.054  |
|         | AUC      | 0.525<br>±0.023                | 0.516<br>±0.042                | <b>0.537</b><br>± <b>0.029</b> | 0.522<br>±0.052                | 0.534<br>±0.054                | 0.506<br>±0.045  | 0.512<br>±0.048 | 0.512<br>±0.033 | 0.552<br>± 0.073 | 0.489<br>±0.050                | 0.481<br>±0.048  | 0.480<br>±0.056                | 0.460<br>±0.041  | 0.469<br>±0.067  | 0.484<br>±0.044   | 0.464<br>±0.032   | 0.489<br>±0.054   | 0.491<br>±0.036   | 0.467<br>±0.043   | 0.428<br>±0.065   |
|         | BAcc     | 0.271<br>±0.026                | 0.275<br>±0.061                | 0.279<br>±0.048                | 0.246<br>±0.061                | <b>0.283</b><br>± <b>0.032</b> | 0.242<br>±0.060  | 0.258<br>±0.067 | 0.267<br>±0.080 | 0.292<br>± 0.091 | 0.233<br>±0.023                | 0.258<br>±0.070  | 0.229<br>±0.057                | 0.221<br>±0.035  | 0.271<br>±0.126  | 0.237<br>±0.043   | 0.188<br>±0.049   | 0.242<br>±0.032   | 0.196<br>±0.035   | 0.225<br>±0.040   | 0.196<br>±0.041   |
|         | Acc.1    | 0.271<br>±0.026                | 0.275<br>±0.061                | 0.279<br>±0.048                | 0.246<br>±0.061                | <b>0.283</b><br>± <b>0.032</b> | 0.242<br>±0.060  | 0.258<br>±0.067 | 0.267<br>±0.080 | 0.292<br>± 0.091 | 0.233<br>±0.023                | 0.258<br>±0.070  | 0.229<br>±0.057                | 0.221<br>±0.035  | 0.271<br>±0.126  | 0.237<br>±0.043   | 0.188<br>±0.049   | 0.242<br>±0.032   | 0.196<br>±0.035   | 0.231<br>±0.047   | 0.196<br>±0.041   |
|         | Acc.2    | <b>0.533</b><br>± <b>0.052</b> | 0.487<br>±0.076                | 0.517<br>±0.070                | 0.517<br>±0.058                | 0.512<br>±0.060                | 0.483<br>±0.056  | 0.500<br>±0.066 | 0.487<br>±0.081 | 0.567<br>± 0.081 | 0.508<br>±0.083                | 0.458<br>±0.071  | 0.500<br>±0.083                | 0.421<br>±0.045  | 0.446<br>±0.097  | 0.496<br>±0.097   | 0.429<br>±0.070   | 0.483<br>±0.050   | 0.492<br>±0.052   | 0.481<br>±0.066   | 0.433<br>±0.096   |
|         | $\kappa$ | 0.020<br>±0.122                | 0.060<br>±0.095                | <b>0.140</b><br>± <b>0.072</b> | 0.113<br>±0.168                | -0.053<br>±0.038               | 0.033<br>±0.129  | 0.007<br>±0.043 | 0.040<br>±0.086 | 0.153<br>± 0.141 | 0.047<br>±0.038                | 0.053<br>±0.110  | 0.040<br>±0.043                | 0.047<br>±0.117  | -0.013<br>±0.038 | 0.053<br>±0.099   | -0.060<br>±0.119  | -0.040<br>±0.132  | -0.040<br>±0.092  | -0.007<br>±0.104  | -0.033<br>±0.078  |
| sub8    | AUC      | 0.540<br>±0.060                | 0.592<br>±0.040                | <b>0.610</b><br>± <b>0.018</b> | 0.606<br>±0.094                | 0.481<br>±0.047                | 0.504<br>±0.116  | 0.549<br>±0.030 | 0.529<br>±0.048 | 0.633<br>± 0.074 | 0.608<br>±0.037                | 0.549<br>±0.066  | 0.536<br>±0.028                | 0.539<br>±0.031  | 0.500<br>±0.030  | 0.537<br>±0.048   | 0.415<br>±0.043   | 0.507<br>±0.088   | 0.432<br>±0.050   | 0.484<br>±0.059   | 0.438<br>±0.023   |
|         | BAcc     | 0.265<br>±0.091                | 0.295<br>±0.072                | <b>0.355</b><br>± <b>0.054</b> | 0.335<br>±0.126                | 0.210<br>±0.029                | 0.275<br>±0.097  | 0.255<br>±0.033 | 0.280<br>±0.065 | 0.365<br>± 0.105 | 0.285<br>±0.029                | 0.290<br>±0.082  | 0.280<br>±0.033                | 0.285<br>±0.088  | 0.240<br>±0.029  | 0.290<br>±0.074   | 0.205<br>±0.089   | 0.220<br>±0.099   | 0.220<br>±0.069   | 0.245<br>±0.078   | 0.225<br>±0.059   |
|         | Acc.1    | 0.265<br>±0.091                | 0.295<br>±0.072                | <b>0.355</b><br>± <b>0.054</b> | 0.335<br>±0.126                | 0.210<br>±0.029                | 0.275<br>±0.097  | 0.255<br>±0.033 | 0.280<br>±0.065 | 0.365<br>± 0.105 | 0.285<br>±0.029                | 0.290<br>±0.082  | 0.280<br>±0.033                | 0.285<br>±0.088  | 0.235<br>±0.029  | 0.290<br>±0.074   | 0.205<br>±0.089   | 0.220<br>±0.099   | 0.220<br>±0.069   | 0.256<br>±0.069   | 0.230<br>±0.054   |
|         | Acc.2    | 0.555<br>±0.057                | <b>0.590</b><br>± <b>0.058</b> | 0.570<br>±0.082                | 0.550<br>±0.077                | 0.450<br>±0.079                | 0.465<br>±0.118  | 0.550<br>±0.025 | 0.550<br>±0.040 | 0.645<br>± 0.116 | <b>0.590</b><br>± <b>0.063</b> | 0.530<br>±0.057  | 0.520<br>±0.041                | 0.515<br>±0.072  | 0.510<br>±0.102  | 0.575<br>±0.061   | 0.390<br>±0.080   | 0.505<br>±0.135   | 0.455<br>±0.089   | 0.522<br>±0.109   | 0.450<br>±0.040   |
|         | $\kappa$ | 0.056<br>±0.130                | 0.089<br>±0.108                | 0.117<br>±0.097                | <b>0.133</b><br>± <b>0.099</b> | 0.100<br>±0.116                | 0.011<br>±0.061  | 0.089<br>±0.093 | 0.006<br>±0.087 | 0.044<br>±0.058  | 0.028<br>±0.028                | 0.156<br>± 0.046 | 0.089<br>±0.041                | 0.017<br>±0.124  | 0.006<br>±0.063  | 0.106<br>±0.087   | 0.033<br>±0.101   | 0.050<br>±0.126   | -0.056<br>±0.081  | 0.067<br>±0.075   | 0.089<br>±0.087   |
|         | AUC      | 0.561<br>±0.059                | 0.564<br>±0.039                | 0.566<br>±0.053                | 0.566<br>± 0.054               | 0.526<br>±0.059                | 0.491<br>±0.046  | 0.556<br>±0.041 | 0.514<br>±0.044 | 0.568<br>±0.066  | 0.521<br>±0.046                | 0.585<br>±0.061  | <b>0.589</b><br>± <b>0.074</b> | 0.510<br>±0.045  | 0.517<br>±0.052  | 0.560<br>±0.073   | 0.525<br>±0.047   | 0.547<br>±0.078   | 0.510<br>±0.042   | 0.560<br>±0.035   | 0.574<br>±0.058   |

Continued on next page

|      | Subject | Metric | DeepConvnet | EEGNet | Conformer      | CTNet  | BIOT <sup>(f)</sup> | BIOT <sup>(l)</sup> | BENDR <sup>(f)</sup> | BENDR <sup>(l)</sup> | CBraMod <sup>(l)</sup> | CBraMod <sup>(l)</sup>       | EEGPT <sup>(f)</sup> | EEGPT <sup>(l)</sup> | LaBraM <sup>(f)</sup> | LaBraM <sup>(l)</sup> | STEEGformer-s <sup>(f)</sup> | STEEGformer-s <sup>(l)</sup> | STEEGformer-b <sup>(f)</sup> | STEEGformer-b <sup>(l)</sup> | STEEGformer-l <sup>(f)</sup> | STEEGformer-l <sup>(l)</sup> |
|------|---------|--------|-------------|--------|----------------|--------|---------------------|---------------------|----------------------|----------------------|------------------------|------------------------------|----------------------|----------------------|-----------------------|-----------------------|------------------------------|------------------------------|------------------------------|------------------------------|------------------------------|------------------------------|
| 4389 | BAcc    | 0.292  | 0.317       | 0.338  | <b>0.350</b>   | 0.325  | 0.258               | 0.317               | 0.254                | 0.283                | 0.271                  | <div>0.367<br/>± 0.035</div> | 0.317                | 0.263                | 0.254                 | 0.329                 | 0.275                        | 0.287                        | 0.208                        | 0.300                        | 0.317                        |                              |
| 4390 |         | ±0.098 | ±0.081      | ±0.073 | ± <b>0.074</b> | ±0.087 | ±0.046              | ±0.070              | ±0.065               | ±0.043               | ±0.021                 |                              | ±0.031               | ±0.093               | ±0.048                | ±0.065                | ±0.076                       | ±0.095                       | ±0.061                       | ±0.056                       | ±0.065                       |                              |
| 4391 | Acc.1   | 0.292  | 0.317       | 0.338  | <b>0.350</b>   | 0.325  | 0.258               | 0.317               | 0.254                | 0.279                | 0.271                  | <div>0.367<br/>± 0.035</div> | 0.317                | 0.263                | 0.258                 | 0.329                 | 0.275                        | 0.287                        | 0.208                        | 0.297                        | 0.317                        |                              |
| 4392 |         | ±0.098 | ±0.081      | ±0.073 | ± <b>0.074</b> | ±0.087 | ±0.046              | ±0.070              | ±0.065               | ±0.048               | ±0.021                 |                              | ±0.031               | ±0.093               | ±0.056                | ±0.065                | ±0.076                       | ±0.095                       | ±0.061                       | ±0.055                       | ±0.065                       |                              |
| 4393 | Acc.2   | 0.550  | 0.542       | 0.558  | 0.575          | 0.508  | 0.504               | 0.571               | 0.475                | 0.592                | 0.533                  | <div>0.604<br/>± 0.061</div> | <b>0.600</b>         | 0.521                | 0.533                 | 0.558                 | 0.529                        | 0.567                        | 0.504                        | 0.547                        | 0.562                        |                              |
| 4394 |         | ±0.093 | ±0.088      | ±0.017 | ±0.076         | ±0.103 | ±0.107              | ±0.064              | ±0.074               | ±0.079               | ±0.046                 |                              | ± <b>0.074</b>       | ±0.061               | ±0.070                | ±0.114                | ±0.048                       | ±0.094                       | ±0.054                       | ±0.052                       | ±0.057                       |                              |
| 4395 |         |        |             |        |                |        |                     |                     |                      |                      |                        |                              |                      |                      |                       |                       |                              |                              |                              |                              |                              |                              |
| 4396 |         |        |             |        |                |        |                     |                     |                      |                      |                        |                              |                      |                      |                       |                       |                              |                              |                              |                              |                              |                              |
| 4397 |         |        |             |        |                |        |                     |                     |                      |                      |                        |                              |                      |                      |                       |                       |                              |                              |                              |                              |                              |                              |
| 4398 |         |        |             |        |                |        |                     |                     |                      |                      |                        |                              |                      |                      |                       |                       |                              |                              |                              |                              |                              |                              |
| 4399 |         |        |             |        |                |        |                     |                     |                      |                      |                        |                              |                      |                      |                       |                       |                              |                              |                              |                              |                              |                              |
| 4400 |         |        |             |        |                |        |                     |                     |                      |                      |                        |                              |                      |                      |                       |                       |                              |                              |                              |                              |                              |                              |
| 4401 |         |        |             |        |                |        |                     |                     |                      |                      |                        |                              |                      |                      |                       |                       |                              |                              |                              |                              |                              |                              |
| 4402 |         |        |             |        |                |        |                     |                     |                      |                      |                        |                              |                      |                      |                       |                       |                              |                              |                              |                              |                              |                              |
| 4403 |         |        |             |        |                |        |                     |                     |                      |                      |                        |                              |                      |                      |                       |                       |                              |                              |                              |                              |                              |                              |
| 4404 |         |        |             |        |                |        |                     |                     |                      |                      |                        |                              |                      |                      |                       |                       |                              |                              |                              |                              |                              |                              |
| 4405 |         |        |             |        |                |        |                     |                     |                      |                      |                        |                              |                      |                      |                       |                       |                              |                              |                              |                              |                              |                              |
| 4406 |         |        |             |        |                |        |                     |                     |                      |                      |                        |                              |                      |                      |                       |                       |                              |                              |                              |                              |                              |                              |
| 4407 |         |        |             |        |                |        |                     |                     |                      |                      |                        |                              |                      |                      |                       |                       |                              |                              |                              |                              |                              |                              |
| 4408 |         |        |             |        |                |        |                     |                     |                      |                      |                        |                              |                      |                      |                       |                       |                              |                              |                              |                              |                              |                              |
| 4409 |         |        |             |        |                |        |                     |                     |                      |                      |                        |                              |                      |                      |                       |                       |                              |                              |                              |                              |                              |                              |
| 4410 |         |        |             |        |                |        |                     |                     |                      |                      |                        |                              |                      |                      |                       |                       |                              |                              |                              |                              |                              |                              |
| 4411 |         |        |             |        |                |        |                     |                     |                      |                      |                        |                              |                      |                      |                       |                       |                              |                              |                              |                              |                              |                              |
| 4412 |         |        |             |        |                |        |                     |                     |                      |                      |                        |                              |                      |                      |                       |                       |                              |                              |                              |                              |                              |                              |
| 4413 |         |        |             |        |                |        |                     |                     |                      |                      |                        |                              |                      |                      |                       |                       |                              |                              |                              |                              |                              |                              |
| 4414 |         |        |             |        |                |        |                     |                     |                      |                      |                        |                              |                      |                      |                       |                       |                              |                              |                              |                              |                              |                              |
| 4415 |         |        |             |        |                |        |                     |                     |                      |                      |                        |                              |                      |                      |                       |                       |                              |                              |                              |                              |                              |                              |
| 4416 |         |        |             |        |                |        |                     |                     |                      |                      |                        |                              |                      |                      |                       |                       |                              |                              |                              |                              |                              |                              |
| 4417 |         |        |             |        |                |        |                     |                     |                      |                      |                        |                              |                      |                      |                       |                       |                              |                              |                              |                              |                              |                              |
| 4418 |         |        |             |        |                |        |                     |                     |                      |                      |                        |                              |                      |                      |                       |                       |                              |                              |                              |                              |                              |                              |
| 4419 |         |        |             |        |                |        |                     |                     |                      |                      |                        |                              |                      |                      |                       |                       |                              |                              |                              |                              |                              |                              |
| 4420 |         |        |             |        |                |        |                     |                     |                      |                      |                        |                              |                      |                      |                       |                       |                              |                              |                              |                              |                              |                              |
| 4421 |         |        |             |        |                |        |                     |                     |                      |                      |                        |                              |                      |                      |                       |                       |                              |                              |                              |                              |                              |                              |

## E.2.2 PER-SUBJECT ZERO-SHOT TRANSFER

Table 43: Average Zero-Shot Transfer Performance Across All Subjects

| Model (Training strategy) | $\kappa$     | AUC          | BAcc         | Acc.1        | Acc.2        |
|---------------------------|--------------|--------------|--------------|--------------|--------------|
| DeepConvnet               | 0.017        | 0.516        | 0.262        | 0.263        | 0.518        |
|                           | $\pm 0.013$  | $\pm 0.009$  | $\pm 0.010$  | $\pm 0.010$  | $\pm 0.010$  |
| EEGNet                    | 0.011        | 0.509        | 0.258        | 0.258        | 0.508        |
|                           | $\pm 0.013$  | $\pm 0.010$  | $\pm 0.009$  | $\pm 0.009$  | $\pm 0.012$  |
| Conformer                 | <b>0.019</b> | 0.517        | <b>0.264</b> | <b>0.265</b> | 0.517        |
|                           | $\pm 0.014$  | $\pm 0.009$  | $\pm 0.011$  | $\pm 0.011$  | $\pm 0.011$  |
| CTNet                     | 0.021        | <b>0.517</b> | 0.266        | 0.266        | <b>0.517</b> |
|                           | $\pm 0.009$  | $\pm 0.008$  | $\pm 0.007$  | $\pm 0.007$  | $\pm 0.010$  |
| BIOT (f)                  | 0.002        | 0.500        | 0.251        | 0.251        | 0.499        |
|                           | $\pm 0.011$  | $\pm 0.005$  | $\pm 0.008$  | $\pm 0.008$  | $\pm 0.005$  |
| BIOT (l)                  | -0.003       | 0.498        | 0.248        | 0.248        | 0.501        |
|                           | $\pm 0.013$  | $\pm 0.008$  | $\pm 0.010$  | $\pm 0.010$  | $\pm 0.009$  |
| BENDR (f)                 | 0.011        | 0.507        | 0.258        | 0.259        | 0.506        |
|                           | $\pm 0.010$  | $\pm 0.009$  | $\pm 0.008$  | $\pm 0.008$  | $\pm 0.011$  |
| BENDR (l)                 | 0.010        | 0.507        | 0.257        | 0.257        | 0.506        |
|                           | $\pm 0.010$  | $\pm 0.008$  | $\pm 0.007$  | $\pm 0.007$  | $\pm 0.012$  |
| CBraMod (f)               | 0.016        | 0.514        | 0.262        | 0.262        | 0.515        |
|                           | $\pm 0.014$  | $\pm 0.011$  | $\pm 0.011$  | $\pm 0.011$  | $\pm 0.013$  |
| CBraMod (l)               | 0.004        | 0.508        | 0.253        | 0.253        | 0.505        |
|                           | $\pm 0.007$  | $\pm 0.007$  | $\pm 0.005$  | $\pm 0.005$  | $\pm 0.007$  |
| EEGPT (f)                 | 0.007        | 0.505        | 0.255        | 0.255        | 0.507        |
|                           | $\pm 0.011$  | $\pm 0.006$  | $\pm 0.008$  | $\pm 0.008$  | $\pm 0.011$  |
| EEGPT (l)                 | 0.005        | 0.504        | 0.254        | 0.254        | 0.496        |
|                           | $\pm 0.014$  | $\pm 0.006$  | $\pm 0.010$  | $\pm 0.010$  | $\pm 0.008$  |
| LaBraM (f)                | 0.006        | 0.504        | 0.255        | 0.255        | 0.501        |
|                           | $\pm 0.011$  | $\pm 0.009$  | $\pm 0.008$  | $\pm 0.008$  | $\pm 0.010$  |
| LaBraM (l)                | 0.006        | 0.509        | 0.254        | 0.254        | 0.513        |
|                           | $\pm 0.013$  | $\pm 0.009$  | $\pm 0.010$  | $\pm 0.010$  | $\pm 0.011$  |
| STEEGformer-s (f)         | 0.007        | 0.505        | 0.255        | 0.255        | 0.503        |
|                           | $\pm 0.007$  | $\pm 0.007$  | $\pm 0.005$  | $\pm 0.005$  | $\pm 0.013$  |
| STEEGformer-s (l)         | 0.003        | 0.501        | 0.252        | 0.252        | 0.500        |
|                           | $\pm 0.006$  | $\pm 0.008$  | $\pm 0.005$  | $\pm 0.005$  | $\pm 0.007$  |
| STEEGformer-b (f)         | 0.007        | 0.505        | 0.255        | 0.255        | 0.501        |
|                           | $\pm 0.009$  | $\pm 0.006$  | $\pm 0.007$  | $\pm 0.007$  | $\pm 0.007$  |
| STEEGformer-b (l)         | 0.003        | 0.504        | 0.252        | 0.252        | 0.504        |
|                           | $\pm 0.011$  | $\pm 0.008$  | $\pm 0.009$  | $\pm 0.009$  | $\pm 0.008$  |
| STEEGformer-l (f)         | -0.001       | 0.502        | 0.249        | 0.249        | 0.506        |
|                           | $\pm 0.007$  | $\pm 0.005$  | $\pm 0.005$  | $\pm 0.007$  | $\pm 0.013$  |
| STEEGformer-l (l)         | 0.004        | 0.501        | 0.253        | 0.252        | 0.499        |
|                           | $\pm 0.009$  | $\pm 0.008$  | $\pm 0.006$  | $\pm 0.006$  | $\pm 0.008$  |



Table 44: Per-Subject Zero-Shot Transfer Performance

| Subject | Metric   | DeepConvnet           | EEGNet                      | Conformer                   | CTNet                       | BIOT (l)              | BIOT (i)              | BENDR (l)            | BENDR (i)            | CBraMod (l)           | CBraMod (i)                 | EEGPT (l)                   | EEGPT (i)            | LaBraM (l)            | LaBraM (i)                  | STEEGformer-s (l)           | STEEGformer-s (i)     | STEEGformer-b (l)     | STEEGformer-b (i)     | STEEGformer-h (l)     | STEEGformer-h (i)     |
|---------|----------|-----------------------|-----------------------------|-----------------------------|-----------------------------|-----------------------|-----------------------|----------------------|----------------------|-----------------------|-----------------------------|-----------------------------|----------------------|-----------------------|-----------------------------|-----------------------------|-----------------------|-----------------------|-----------------------|-----------------------|-----------------------|
| sub1    | $\kappa$ | 0.014<br>$\pm 0.032$  | 0.035<br>$\pm 0.026$        | 0.026<br>$\pm 0.036$        | 0.028<br>$\pm 0.023$        | -0.009<br>$\pm 0.020$ | -0.024<br>$\pm 0.048$ | 0.006<br>$\pm 0.030$ | 0.006<br>$\pm 0.044$ | -0.002<br>$\pm 0.044$ | -0.005<br>$\pm 0.029$       | 0.020<br>$\pm 0.044$        | 0.027<br>$\pm 0.056$ | 0.005<br>$\pm 0.023$  | <b>0.032</b><br>$\pm 0.037$ | 0.020<br>$\pm 0.026$        | 0.005<br>$\pm 0.024$  | -0.000<br>$\pm 0.031$ | 0.013<br>$\pm 0.020$  | 0.002<br>$\pm 0.020$  | 0.014<br>$\pm 0.026$  |
|         | AUC      | 0.513<br>$\pm 0.026$  | 0.522<br>$\pm 0.019$        | 0.520<br>$\pm 0.018$        | 0.527<br>$\pm 0.012$        | 0.503<br>$\pm 0.022$  | 0.487<br>$\pm 0.033$  | 0.510<br>$\pm 0.013$ | 0.513<br>$\pm 0.019$ | 0.501<br>$\pm 0.044$  | 0.496<br>$\pm 0.036$        | 0.510<br>$\pm 0.028$        | 0.515<br>$\pm 0.034$ | 0.505<br>$\pm 0.009$  | <b>0.526</b><br>$\pm 0.025$ | 0.517<br>$\pm 0.014$        | 0.507<br>$\pm 0.012$  | 0.501<br>$\pm 0.023$  | 0.512<br>$\pm 0.013$  | 0.499<br>$\pm 0.020$  | 0.512<br>$\pm 0.010$  |
|         | BAcc     | 0.261<br>$\pm 0.024$  | 0.276<br>$\pm 0.019$        | 0.269<br>$\pm 0.027$        | 0.271<br>$\pm 0.018$        | 0.243<br>$\pm 0.015$  | 0.232<br>$\pm 0.036$  | 0.255<br>$\pm 0.023$ | 0.255<br>$\pm 0.033$ | 0.248<br>$\pm 0.033$  | 0.246<br>$\pm 0.022$        | 0.265<br>$\pm 0.033$        | 0.270<br>$\pm 0.042$ | 0.253<br>$\pm 0.017$  | <b>0.274</b><br>$\pm 0.028$ | 0.265<br>$\pm 0.020$        | 0.254<br>$\pm 0.018$  | 0.250<br>$\pm 0.024$  | 0.260<br>$\pm 0.015$  | 0.252<br>$\pm 0.015$  | 0.260<br>$\pm 0.019$  |
|         | Acc_1    | 0.260<br>$\pm 0.024$  | 0.276<br>$\pm 0.019$        | 0.269<br>$\pm 0.027$        | 0.271<br>$\pm 0.018$        | 0.243<br>$\pm 0.015$  | 0.232<br>$\pm 0.036$  | 0.255<br>$\pm 0.023$ | 0.254<br>$\pm 0.033$ | 0.248<br>$\pm 0.033$  | 0.246<br>$\pm 0.022$        | 0.265<br>$\pm 0.033$        | 0.270<br>$\pm 0.042$ | 0.253<br>$\pm 0.017$  | <b>0.275</b><br>$\pm 0.028$ | 0.265<br>$\pm 0.020$        | 0.254<br>$\pm 0.018$  | 0.250<br>$\pm 0.023$  | 0.260<br>$\pm 0.015$  | 0.247<br>$\pm 0.025$  | 0.260<br>$\pm 0.019$  |
|         | Acc_2    | 0.506<br>$\pm 0.023$  | 0.511<br>$\pm 0.033$        | 0.514<br>$\pm 0.029$        | <b>0.528</b><br>$\pm 0.018$ | 0.504<br>$\pm 0.021$  | 0.488<br>$\pm 0.024$  | 0.511<br>$\pm 0.022$ | 0.494<br>$\pm 0.037$ | 0.503<br>$\pm 0.047$  | 0.497<br>$\pm 0.029$        | 0.504<br>$\pm 0.021$        | 0.506<br>$\pm 0.048$ | 0.503<br>$\pm 0.017$  | 0.534<br>$\pm 0.028$        | 0.518<br>$\pm 0.010$        | 0.510<br>$\pm 0.027$  | 0.487<br>$\pm 0.017$  | 0.509<br>$\pm 0.016$  | 0.498<br>$\pm 0.020$  | 0.507<br>$\pm 0.024$  |
| sub10   | $\kappa$ | -0.002<br>$\pm 0.028$ | -0.013<br>$\pm 0.043$       | 0.021<br>$\pm 0.031$        | 0.030<br>$\pm 0.059$        | 0.016<br>$\pm 0.026$  | -0.002<br>$\pm 0.035$ | 0.012<br>$\pm 0.030$ | 0.020<br>$\pm 0.031$ | 0.004<br>$\pm 0.041$  | -0.000<br>$\pm 0.032$       | <b>0.024</b><br>$\pm 0.030$ | 0.001<br>$\pm 0.024$ | -0.001<br>$\pm 0.020$ | 0.001<br>$\pm 0.026$        | 0.005<br>$\pm 0.031$        | 0.001<br>$\pm 0.021$  | -0.002<br>$\pm 0.024$ | 0.002<br>$\pm 0.033$  | -0.011<br>$\pm 0.043$ | -0.014<br>$\pm 0.017$ |
|         | AUC      | 0.503<br>$\pm 0.020$  | 0.494<br>$\pm 0.020$        | 0.516<br>$\pm 0.023$        | 0.515<br>$\pm 0.038$        | 0.501<br>$\pm 0.018$  | 0.493<br>$\pm 0.025$  | 0.503<br>$\pm 0.019$ | 0.511<br>$\pm 0.020$ | 0.511<br>$\pm 0.030$  | <b>0.515</b><br>$\pm 0.013$ | 0.512<br>$\pm 0.028$        | 0.504<br>$\pm 0.021$ | 0.509<br>$\pm 0.011$  | 0.502<br>$\pm 0.024$        | 0.506<br>$\pm 0.018$        | 0.501<br>$\pm 0.020$  | 0.504<br>$\pm 0.018$  | 0.502<br>$\pm 0.023$  | 0.494<br>$\pm 0.027$  | 0.494<br>$\pm 0.023$  |
|         | BAcc     | 0.249<br>$\pm 0.021$  | 0.240<br>$\pm 0.032$        | 0.266<br>$\pm 0.023$        | 0.272<br>$\pm 0.044$        | 0.262<br>$\pm 0.019$  | 0.248<br>$\pm 0.026$  | 0.259<br>$\pm 0.022$ | 0.265<br>$\pm 0.023$ | 0.253<br>$\pm 0.031$  | 0.250<br>$\pm 0.024$        | <b>0.268</b><br>$\pm 0.022$ | 0.251<br>$\pm 0.018$ | 0.249<br>$\pm 0.015$  | 0.251<br>$\pm 0.020$        | 0.253<br>$\pm 0.023$        | 0.251<br>$\pm 0.016$  | 0.248<br>$\pm 0.018$  | 0.251<br>$\pm 0.025$  | 0.242<br>$\pm 0.032$  | 0.240<br>$\pm 0.012$  |
|         | Acc_1    | 0.249<br>$\pm 0.021$  | 0.240<br>$\pm 0.032$        | 0.265<br>$\pm 0.024$        | 0.272<br>$\pm 0.044$        | 0.262<br>$\pm 0.020$  | 0.248<br>$\pm 0.026$  | 0.259<br>$\pm 0.022$ | 0.265<br>$\pm 0.023$ | 0.253<br>$\pm 0.031$  | 0.250<br>$\pm 0.024$        | <b>0.268</b><br>$\pm 0.022$ | 0.251<br>$\pm 0.018$ | 0.249<br>$\pm 0.015$  | 0.250<br>$\pm 0.020$        | 0.253<br>$\pm 0.023$        | 0.251<br>$\pm 0.016$  | 0.248<br>$\pm 0.019$  | 0.251<br>$\pm 0.025$  | 0.236<br>$\pm 0.036$  | 0.240<br>$\pm 0.012$  |
|         | Acc_2    | 0.506<br>$\pm 0.035$  | 0.495<br>$\pm 0.036$        | 0.506<br>$\pm 0.043$        | 0.506<br>$\pm 0.027$        | 0.506<br>$\pm 0.027$  | 0.503<br>$\pm 0.026$  | 0.501<br>$\pm 0.031$ | 0.510<br>$\pm 0.027$ | 0.509<br>$\pm 0.035$  | 0.496<br>$\pm 0.016$        | 0.526<br>$\pm 0.031$        | 0.500<br>$\pm 0.030$ | 0.502<br>$\pm 0.018$  | 0.512<br>$\pm 0.020$        | <b>0.517</b><br>$\pm 0.009$ | 0.495<br>$\pm 0.016$  | 0.498<br>$\pm 0.026$  | 0.500<br>$\pm 0.020$  | 0.507<br>$\pm 0.031$  | 0.488<br>$\pm 0.023$  |
| sub2    | $\kappa$ | 0.005<br>$\pm 0.045$  | <b>0.022</b><br>$\pm 0.025$ | 0.033<br>$\pm 0.020$        | 0.003<br>$\pm 0.028$        | 0.001<br>$\pm 0.032$  | 0.017<br>$\pm 0.027$  | 0.011<br>$\pm 0.034$ | 0.006<br>$\pm 0.052$ | 0.015<br>$\pm 0.027$  | -0.003<br>$\pm 0.033$       | -0.007<br>$\pm 0.043$       | 0.015<br>$\pm 0.029$ | -0.001<br>$\pm 0.049$ | 0.008<br>$\pm 0.040$        | -0.000<br>$\pm 0.027$       | -0.007<br>$\pm 0.029$ | 0.017<br>$\pm 0.049$  | -0.016<br>$\pm 0.032$ | 0.008<br>$\pm 0.033$  | 0.005<br>$\pm 0.022$  |
|         | AUC      | 0.515<br>$\pm 0.037$  | 0.525<br>$\pm 0.020$        | <b>0.525</b><br>$\pm 0.016$ | 0.513<br>$\pm 0.014$        | 0.499<br>$\pm 0.022$  | 0.511<br>$\pm 0.023$  | 0.520<br>$\pm 0.028$ | 0.505<br>$\pm 0.029$ | 0.510<br>$\pm 0.023$  | 0.506<br>$\pm 0.022$        | 0.494<br>$\pm 0.022$        | 0.498<br>$\pm 0.022$ | 0.506<br>$\pm 0.025$  | 0.518<br>$\pm 0.030$        | 0.498<br>$\pm 0.030$        | 0.482<br>$\pm 0.023$  | 0.510<br>$\pm 0.026$  | 0.488<br>$\pm 0.023$  | 0.504<br>$\pm 0.020$  | 0.502<br>$\pm 0.027$  |
|         | BAcc     | 0.253<br>$\pm 0.034$  | <b>0.266</b><br>$\pm 0.019$ | 0.274<br>$\pm 0.015$        | $\pm 0.021$                 | 0.252<br>$\pm 0.024$  | 0.262<br>$\pm 0.021$  | 0.259<br>$\pm 0.025$ | 0.254<br>$\pm 0.039$ | 0.261<br>$\pm 0.020$  | 0.248<br>$\pm 0.025$        | 0.245<br>$\pm 0.032$        | 0.261<br>$\pm 0.022$ | 0.249<br>$\pm 0.037$  | 0.256<br>$\pm 0.030$        | 0.250<br>$\pm 0.021$        | 0.245<br>$\pm 0.022$  | 0.263<br>$\pm 0.037$  | 0.238<br>$\pm 0.024$  | 0.256<br>$\pm 0.025$  | 0.253<br>$\pm 0.016$  |
|         | Acc_1    | 0.253<br>$\pm 0.034$  | <b>0.266</b><br>$\pm 0.019$ | 0.275<br>$\pm 0.015$        | $\pm 0.021$                 | 0.252<br>$\pm 0.024$  | 0.251<br>$\pm 0.021$  | 0.262<br>$\pm 0.021$ | 0.258<br>$\pm 0.025$ | 0.254<br>$\pm 0.039$  | 0.261<br>$\pm 0.020$        | 0.248<br>$\pm 0.025$        | 0.245<br>$\pm 0.032$ | 0.261<br>$\pm 0.022$  | 0.249<br>$\pm 0.037$        | 0.250<br>$\pm 0.021$        | 0.245<br>$\pm 0.022$  | 0.263<br>$\pm 0.037$  | 0.237<br>$\pm 0.024$  | 0.260<br>$\pm 0.023$  | 0.253<br>$\pm 0.017$  |
|         | Acc_2    | 0.528<br>$\pm 0.051$  | <b>0.534</b><br>$\pm 0.025$ | 0.537<br>$\pm 0.020$        | 0.519<br>$\pm 0.024$        | 0.503<br>$\pm 0.024$  | 0.517<br>$\pm 0.029$  | 0.513<br>$\pm 0.034$ | 0.511<br>$\pm 0.033$ | 0.513<br>$\pm 0.036$  | 0.517<br>$\pm 0.032$        | 0.494<br>$\pm 0.021$        | 0.495<br>$\pm 0.017$ | 0.496<br>$\pm 0.032$  | 0.510<br>$\pm 0.024$        | 0.482<br>$\pm 0.022$        | 0.488<br>$\pm 0.024$  | 0.504<br>$\pm 0.032$  | 0.490<br>$\pm 0.023$  | 0.516<br>$\pm 0.034$  | 0.513<br>$\pm 0.018$  |

Continued on next page

| SubjectMetric |          | DeepConvnet          | EEGNet               | Conformer                   | CTNet                       | BIOT (f)              | BIOT (l)              | BENDR (f)                   | BENDR (l)                   | CBraMod (f)                 | CBraMod (l)                 | EEGPT (f)             | EEGPT (l)             | LaBraM (f)            | LaBraM (l)            | STEEGformer-s (f)    | STEEGformer-s (l)     | STEEGformer-b (f)           | STEEGformer-b (l)           | STEEGformer-h (f)     | STEEGformer-h (l)    |
|---------------|----------|----------------------|----------------------|-----------------------------|-----------------------------|-----------------------|-----------------------|-----------------------------|-----------------------------|-----------------------------|-----------------------------|-----------------------|-----------------------|-----------------------|-----------------------|----------------------|-----------------------|-----------------------------|-----------------------------|-----------------------|----------------------|
| sub3          | $\kappa$ | 0.007<br>$\pm 0.044$ | 0.008<br>$\pm 0.031$ | -0.010<br>$\pm 0.039$       | 0.008<br>$\pm 0.032$        | 0.008<br>$\pm 0.035$  | -0.002<br>$\pm 0.031$ | -0.005<br>$\pm 0.056$       | -0.002<br>$\pm 0.026$       | 0.013<br>$\pm 0.030$        | 0.000<br>$\pm 0.047$        | -0.003<br>$\pm 0.032$ | -0.007<br>$\pm 0.034$ | 0.016<br>$\pm 0.027$  | 0.011<br>$\pm 0.037$  | 0.003<br>$\pm 0.016$ | 0.010<br>$\pm 0.035$  | 0.007<br>$\pm 0.018$        | <b>0.013</b><br>$\pm 0.030$ | -0.005<br>$\pm 0.033$ | 0.008<br>$\pm 0.016$ |
|               | AUC      | 0.514<br>$\pm 0.035$ | 0.506<br>$\pm 0.025$ | 0.503<br>$\pm 0.026$        | <b>0.508</b><br>$\pm 0.023$ | 0.504<br>$\pm 0.018$  | 0.505<br>$\pm 0.018$  | 0.497<br>$\pm 0.034$        | 0.498<br>$\pm 0.021$        | 0.502<br>$\pm 0.031$        | 0.505<br>$\pm 0.039$        | 0.496<br>$\pm 0.026$  | 0.503<br>$\pm 0.013$  | 0.507<br>$\pm 0.019$  | 0.504<br>$\pm 0.025$  | 0.508<br>$\pm 0.022$ | 0.501<br>$\pm 0.028$  | 0.496<br>$\pm 0.028$        | 0.502<br>$\pm 0.030$        | 0.500<br>$\pm 0.027$  | 0.503<br>$\pm 0.036$ |
|               | BAcc     | 0.255<br>$\pm 0.033$ | 0.256<br>$\pm 0.023$ | 0.243<br>$\pm 0.029$        | 0.256<br>$\pm 0.024$        | 0.256<br>$\pm 0.026$  | 0.248<br>$\pm 0.023$  | 0.247<br>$\pm 0.042$        | 0.248<br>$\pm 0.020$        | <b>0.260</b><br>$\pm 0.023$ | 0.250<br>$\pm 0.035$        | 0.248<br>$\pm 0.024$  | 0.245<br>$\pm 0.025$  | 0.262<br>$\pm 0.020$  | 0.258<br>$\pm 0.028$  | 0.252<br>$\pm 0.012$ | 0.258<br>$\pm 0.026$  | 0.255<br>$\pm 0.014$        | 0.260<br>$\pm 0.022$        | 0.246<br>$\pm 0.025$  | 0.256<br>$\pm 0.012$ |
|               | Acc_1    | 0.255<br>$\pm 0.033$ | 0.256<br>$\pm 0.023$ | 0.243<br>$\pm 0.029$        | 0.256<br>$\pm 0.024$        | 0.256<br>$\pm 0.026$  | 0.248<br>$\pm 0.023$  | 0.247<br>$\pm 0.042$        | 0.248<br>$\pm 0.020$        | 0.260<br>$\pm 0.023$        | 0.250<br>$\pm 0.035$        | 0.248<br>$\pm 0.024$  | 0.245<br>$\pm 0.026$  | 0.262<br>$\pm 0.020$  | 0.258<br>$\pm 0.028$  | 0.251<br>$\pm 0.013$ | 0.257<br>$\pm 0.025$  | 0.255<br>$\pm 0.014$        | <b>0.260</b><br>$\pm 0.023$ | 0.247<br>$\pm 0.030$  | 0.256<br>$\pm 0.011$ |
|               | Acc_2    | 0.523<br>$\pm 0.032$ | 0.512<br>$\pm 0.035$ | 0.514<br>$\pm 0.032$        | 0.511<br>$\pm 0.036$        | 0.495<br>$\pm 0.016$  | 0.502<br>$\pm 0.022$  | 0.497<br>$\pm 0.047$        | <b>0.517</b><br>$\pm 0.030$ | 0.513<br>$\pm 0.059$        | 0.512<br>$\pm 0.048$        | 0.489<br>$\pm 0.039$  | 0.496<br>$\pm 0.018$  | 0.511<br>$\pm 0.020$  | 0.512<br>$\pm 0.025$  | 0.487<br>$\pm 0.017$ | 0.499<br>$\pm 0.030$  | 0.493<br>$\pm 0.018$        | 0.506<br>$\pm 0.029$        | 0.514<br>$\pm 0.047$  | 0.501<br>$\pm 0.032$ |
| sub4          | $\kappa$ | 0.034<br>$\pm 0.042$ | 0.007<br>$\pm 0.026$ | 0.010<br>$\pm 0.035$        | 0.020<br>$\pm 0.034$        | -0.006<br>$\pm 0.027$ | 0.013<br>$\pm 0.034$  | 0.018<br>$\pm 0.042$        | -0.008<br>$\pm 0.036$       | 0.025<br>$\pm 0.029$        | -0.005<br>$\pm 0.037$       | 0.002<br>$\pm 0.024$  | 0.017<br>$\pm 0.019$  | 0.004<br>$\pm 0.010$  | 0.015<br>$\pm 0.036$  | 0.013<br>$\pm 0.039$ | -0.002<br>$\pm 0.024$ | <b>0.027</b><br>$\pm 0.030$ | 0.003<br>$\pm 0.012$        | -0.005<br>$\pm 0.037$ | 0.000<br>$\pm 0.026$ |
|               | AUC      | 0.534<br>$\pm 0.030$ | 0.510<br>$\pm 0.017$ | <b>0.518</b><br>$\pm 0.024$ | 0.517<br>$\pm 0.026$        | 0.496<br>$\pm 0.024$  | 0.497<br>$\pm 0.019$  | 0.510<br>$\pm 0.022$        | 0.487<br>$\pm 0.019$        | 0.514<br>$\pm 0.024$        | 0.504<br>$\pm 0.031$        | 0.505<br>$\pm 0.022$  | 0.499<br>$\pm 0.018$  | 0.498<br>$\pm 0.015$  | 0.515<br>$\pm 0.019$  | 0.508<br>$\pm 0.026$ | 0.507<br>$\pm 0.021$  | 0.515<br>$\pm 0.022$        | 0.511<br>$\pm 0.013$        | 0.508<br>$\pm 0.032$  | 0.511<br>$\pm 0.017$ |
|               | BAcc     | 0.276<br>$\pm 0.031$ | 0.255<br>$\pm 0.019$ | 0.257<br>$\pm 0.026$        | 0.265<br>$\pm 0.025$        | 0.245<br>$\pm 0.020$  | 0.260<br>$\pm 0.026$  | 0.264<br>$\pm 0.031$        | 0.244<br>$\pm 0.027$        | 0.269<br>$\pm 0.022$        | 0.246<br>$\pm 0.028$        | 0.251<br>$\pm 0.018$  | 0.263<br>$\pm 0.014$  | 0.253<br>$\pm 0.007$  | 0.261<br>$\pm 0.027$  | 0.259<br>$\pm 0.029$ | 0.248<br>$\pm 0.018$  | <b>0.270</b><br>$\pm 0.022$ | 0.252<br>$\pm 0.009$        | 0.246<br>$\pm 0.028$  | 0.250<br>$\pm 0.019$ |
|               | Acc_1    | 0.276<br>$\pm 0.031$ | 0.255<br>$\pm 0.019$ | 0.258<br>$\pm 0.026$        | 0.265<br>$\pm 0.025$        | 0.245<br>$\pm 0.020$  | 0.260<br>$\pm 0.025$  | 0.264<br>$\pm 0.031$        | 0.244<br>$\pm 0.027$        | 0.269<br>$\pm 0.022$        | 0.246<br>$\pm 0.028$        | 0.251<br>$\pm 0.018$  | 0.263<br>$\pm 0.015$  | 0.253<br>$\pm 0.007$  | 0.262<br>$\pm 0.028$  | 0.260<br>$\pm 0.029$ | 0.248<br>$\pm 0.018$  | <b>0.270</b><br>$\pm 0.022$ | 0.252<br>$\pm 0.010$        | 0.252<br>$\pm 0.025$  | 0.250<br>$\pm 0.020$ |
|               | Acc_2    | 0.530<br>$\pm 0.040$ | 0.511<br>$\pm 0.022$ | <b>0.530</b><br>$\pm 0.025$ | 0.522<br>$\pm 0.049$        | 0.493<br>$\pm 0.032$  | 0.499<br>$\pm 0.023$  | 0.503<br>$\pm 0.031$        | 0.478<br>$\pm 0.021$        | 0.513<br>$\pm 0.042$        | 0.501<br>$\pm 0.027$        | 0.502<br>$\pm 0.037$  | 0.492<br>$\pm 0.032$  | 0.491<br>$\pm 0.023$  | 0.517<br>$\pm 0.022$  | 0.516<br>$\pm 0.022$ | 0.508<br>$\pm 0.029$  | 0.511<br>$\pm 0.031$        | 0.507<br>$\pm 0.018$        | 0.524<br>$\pm 0.012$  | 0.501<br>$\pm 0.021$ |
| sub5          | $\kappa$ | 0.016<br>$\pm 0.038$ | 0.015<br>$\pm 0.040$ | 0.022<br>$\pm 0.038$        | 0.017<br>$\pm 0.043$        | -0.012<br>$\pm 0.027$ | -0.004<br>$\pm 0.033$ | <b>0.027</b><br>$\pm 0.032$ | 0.019<br>$\pm 0.026$        | 0.030<br>$\pm 0.047$        | 0.013<br>$\pm 0.031$        | -0.003<br>$\pm 0.024$ | -0.001<br>$\pm 0.034$ | 0.013<br>$\pm 0.048$  | 0.007<br>$\pm 0.027$  | 0.011<br>$\pm 0.042$ | 0.010<br>$\pm 0.026$  | -0.005<br>$\pm 0.043$       | -0.009<br>$\pm 0.029$       | -0.008<br>$\pm 0.030$ | 0.006<br>$\pm 0.023$ |
|               | AUC      | 0.516<br>$\pm 0.023$ | 0.515<br>$\pm 0.029$ | 0.520<br>$\pm 0.020$        | 0.514<br>$\pm 0.024$        | 0.495<br>$\pm 0.019$  | 0.494<br>$\pm 0.020$  | 0.507<br>$\pm 0.022$        | 0.513<br>$\pm 0.018$        | 0.527<br>$\pm 0.023$        | <b>0.523</b><br>$\pm 0.021$ | 0.503<br>$\pm 0.021$  | 0.502<br>$\pm 0.024$  | 0.500<br>$\pm 0.029$  | 0.505<br>$\pm 0.019$  | 0.492<br>$\pm 0.037$ | 0.505<br>$\pm 0.018$  | 0.501<br>$\pm 0.033$        | 0.498<br>$\pm 0.027$        | 0.509<br>$\pm 0.014$  | 0.504<br>$\pm 0.015$ |
|               | BAcc     | 0.262<br>$\pm 0.029$ | 0.261<br>$\pm 0.030$ | 0.266<br>$\pm 0.029$        | 0.263<br>$\pm 0.032$        | 0.241<br>$\pm 0.020$  | 0.247<br>$\pm 0.025$  | <b>0.270</b><br>$\pm 0.024$ | 0.265<br>$\pm 0.020$        | 0.273<br>$\pm 0.035$        | 0.260<br>$\pm 0.023$        | 0.248<br>$\pm 0.018$  | 0.249<br>$\pm 0.026$  | 0.260<br>$\pm 0.036$  | 0.255<br>$\pm 0.020$  | 0.258<br>$\pm 0.032$ | 0.257<br>$\pm 0.020$  | 0.246<br>$\pm 0.033$        | 0.243<br>$\pm 0.022$        | 0.244<br>$\pm 0.023$  | 0.255<br>$\pm 0.017$ |
|               | Acc_1    | 0.262<br>$\pm 0.029$ | 0.261<br>$\pm 0.030$ | 0.266<br>$\pm 0.029$        | 0.263<br>$\pm 0.032$        | 0.241<br>$\pm 0.020$  | 0.247<br>$\pm 0.025$  | <b>0.270</b><br>$\pm 0.024$ | 0.265<br>$\pm 0.020$        | 0.273<br>$\pm 0.035$        | 0.260<br>$\pm 0.022$        | 0.248<br>$\pm 0.018$  | 0.249<br>$\pm 0.026$  | 0.259<br>$\pm 0.036$  | 0.254<br>$\pm 0.020$  | 0.258<br>$\pm 0.031$ | 0.258<br>$\pm 0.020$  | 0.247<br>$\pm 0.032$        | 0.243<br>$\pm 0.022$        | 0.242<br>$\pm 0.027$  | 0.254<br>$\pm 0.016$ |
|               | Acc_2    | 0.509<br>$\pm 0.025$ | 0.509<br>$\pm 0.032$ | <b>0.523</b><br>$\pm 0.026$ | 0.519<br>$\pm 0.032$        | 0.499<br>$\pm 0.016$  | 0.496<br>$\pm 0.022$  | 0.513<br>$\pm 0.033$        | 0.501<br>$\pm 0.022$        | 0.523<br>$\pm 0.026$        | 0.510<br>$\pm 0.026$        | 0.508<br>$\pm 0.029$  | 0.493<br>$\pm 0.035$  | 0.499<br>$\pm 0.021$  | 0.521<br>$\pm 0.034$  | 0.492<br>$\pm 0.022$ | 0.504<br>$\pm 0.025$  | 0.502<br>$\pm 0.027$        | 0.506<br>$\pm 0.025$        | 0.505<br>$\pm 0.024$  | 0.497<br>$\pm 0.021$ |
| sub6          | $\kappa$ | 0.016<br>$\pm 0.044$ | 0.002<br>$\pm 0.040$ | 0.019<br>$\pm 0.050$        | <b>0.022</b><br>$\pm 0.030$ | 0.006<br>$\pm 0.030$  | -0.014<br>$\pm 0.023$ | -0.004<br>$\pm 0.033$       | 0.011<br>$\pm 0.026$        | -0.004<br>$\pm 0.038$       | 0.007<br>$\pm 0.032$        | 0.020<br>$\pm 0.033$  | -0.020<br>$\pm 0.026$ | -0.009<br>$\pm 0.035$ | -0.016<br>$\pm 0.045$ | 0.006<br>$\pm 0.010$ | 0.006<br>$\pm 0.028$  | 0.008<br>$\pm 0.032$        | 0.023<br>$\pm 0.020$        | 0.004<br>$\pm 0.032$  | 0.000<br>$\pm 0.030$ |

Continued on next page

| Subject | Metric   | DeepConvnet                    | EEGNet          | Conformer        | CTNet                          | BIOT (i)         | BIOT (i)         | BENDR (i)                      | BENDR (i)        | CBraMod (i)                    | CBraMod (i)     | EEGPT (i)        | EEGPT (i)        | LaBraM (i)       | LaBraM (i)       | STEEGformer-s (i) | STEEGformer-s (i) | STEEGformer-b (i) | STEEGformer-b (i) | STEEGformer-b (i) | STEEGformer-b (i) |
|---------|----------|--------------------------------|-----------------|------------------|--------------------------------|------------------|------------------|--------------------------------|------------------|--------------------------------|-----------------|------------------|------------------|------------------|------------------|-------------------|-------------------|-------------------|-------------------|-------------------|-------------------|
|         | AUC      | 0.503<br>±0.030                | 0.499<br>±0.022 | 0.506<br>±0.033  | <b>0.511</b><br>± <b>0.024</b> | 0.489<br>±0.017  | 0.497<br>±0.022  | 0.490<br>±0.024                | 0.511<br>±0.012  | 0.505<br>±0.026                | 0.500<br>±0.024 | 0.503<br>±0.022  | 0.495<br>±0.025  | 0.501<br>±0.015  | 0.504<br>±0.033  | 0.504<br>±0.025   | 0.507<br>±0.019   | 0.505<br>±0.026   | 0.513<br>± 0.021  | 0.503<br>±0.022   | 0.503<br>±0.017   |
|         | BAcc     | 0.262<br>±0.033                | 0.251<br>±0.030 | 0.264<br>±0.038  | <b>0.266</b><br>± <b>0.023</b> | 0.254<br>±0.023  | 0.240<br>±0.017  | 0.247<br>±0.025                | 0.259<br>±0.019  | 0.247<br>±0.028                | 0.256<br>±0.024 | 0.265<br>±0.025  | 0.235<br>±0.020  | 0.243<br>±0.026  | 0.238<br>±0.034  | 0.255<br>±0.007   | 0.255<br>±0.021   | 0.256<br>±0.024   | 0.267<br>± 0.015  | 0.253<br>±0.024   | 0.250<br>±0.023   |
|         | Acc.1    | 0.262<br>±0.033                | 0.251<br>±0.030 | 0.264<br>±0.038  | <b>0.266</b><br>± <b>0.023</b> | 0.254<br>±0.023  | 0.240<br>±0.017  | 0.247<br>±0.025                | 0.259<br>±0.019  | 0.247<br>±0.028                | 0.256<br>±0.023 | 0.265<br>±0.025  | 0.235<br>±0.020  | 0.243<br>±0.026  | 0.239<br>±0.034  | 0.255<br>±0.007   | 0.255<br>±0.021   | 0.256<br>±0.024   | 0.267<br>± 0.016  | 0.251<br>±0.024   | 0.251<br>±0.023   |
|         | Acc.2    | <b>0.512</b><br>± <b>0.032</b> | 0.498<br>±0.023 | 0.499<br>±0.044  | 0.508<br>±0.037                | 0.489<br>±0.020  | 0.491<br>±0.021  | 0.480<br>±0.033                | 0.507<br>±0.030  | 0.499<br>±0.035                | 0.496<br>±0.028 | 0.506<br>±0.024  | 0.486<br>±0.041  | 0.500<br>±0.037  | 0.515<br>± 0.041 | 0.493<br>±0.027   | 0.507<br>±0.022   | 0.503<br>±0.015   | 0.502<br>±0.023   | 0.506<br>±0.018   | 0.496<br>±0.030   |
|         | $\kappa$ | 0.016<br>±0.037                | 0.010<br>±0.026 | 0.016<br>±0.039  | 0.036<br>± 0.048               | -0.015<br>±0.041 | -0.013<br>±0.038 | <b>0.024</b><br>± <b>0.045</b> | 0.013<br>±0.031  | 0.018<br>±0.020                | 0.009<br>±0.021 | 0.010<br>±0.040  | 0.012<br>±0.040  | -0.008<br>±0.023 | -0.011<br>±0.030 | -0.005<br>±0.042  | -0.007<br>±0.019  | 0.000<br>±0.040   | -0.006<br>±0.028  | 0.010<br>±0.029   | -0.008<br>±0.011  |
| sub7    | AUC      | 0.518<br>±0.019                | 0.515<br>±0.023 | 0.519<br>±0.018  | 0.524<br>± 0.030               | 0.504<br>±0.023  | 0.494<br>±0.025  | 0.517<br>±0.026                | 0.512<br>±0.022  | <b>0.519</b><br>± <b>0.020</b> | 0.502<br>±0.018 | 0.507<br>±0.030  | 0.513<br>±0.021  | 0.483<br>±0.023  | 0.492<br>±0.020  | 0.499<br>±0.022   | 0.490<br>±0.020   | 0.508<br>±0.030   | 0.500<br>±0.015   | 0.498<br>±0.026   | 0.481<br>±0.013   |
|         | BAcc     | 0.262<br>±0.027                | 0.258<br>±0.019 | 0.262<br>±0.029  | 0.277<br>± 0.036               | 0.239<br>±0.031  | 0.240<br>±0.028  | <b>0.268</b><br>± <b>0.034</b> | 0.260<br>±0.023  | 0.264<br>±0.015                | 0.257<br>±0.016 | 0.257<br>±0.030  | 0.259<br>±0.030  | 0.244<br>±0.017  | 0.242<br>±0.023  | 0.246<br>±0.032   | 0.245<br>±0.014   | 0.250<br>±0.030   | 0.246<br>±0.021   | 0.257<br>±0.022   | 0.244<br>±0.008   |
|         | Acc.1    | 0.262<br>±0.027                | 0.258<br>±0.019 | 0.262<br>±0.029  | 0.277<br>± 0.036               | 0.239<br>±0.031  | 0.241<br>±0.028  | <b>0.269</b><br>± <b>0.035</b> | 0.260<br>±0.023  | 0.264<br>±0.016                | 0.257<br>±0.016 | 0.258<br>±0.030  | 0.259<br>±0.030  | 0.244<br>±0.018  | 0.241<br>±0.023  | 0.246<br>±0.032   | 0.244<br>±0.013   | 0.250<br>±0.031   | 0.245<br>±0.021   | 0.252<br>±0.027   | 0.243<br>±0.010   |
|         | Acc.2    | <b>0.523</b><br>± <b>0.016</b> | 0.519<br>±0.034 | 0.514<br>±0.027  | 0.521<br>±0.033                | 0.502<br>±0.023  | 0.513<br>±0.028  | 0.519<br>±0.045                | 0.514<br>±0.035  | 0.523<br>± 0.034               | 0.504<br>±0.029 | 0.522<br>±0.027  | 0.513<br>±0.034  | 0.482<br>±0.030  | 0.490<br>±0.030  | 0.505<br>±0.027   | 0.491<br>±0.020   | 0.501<br>±0.037   | 0.497<br>±0.026   | 0.479<br>±0.033   | 0.486<br>±0.013   |
|         | $\kappa$ | 0.044<br>±0.031                | 0.021<br>±0.045 | 0.046<br>± 0.029 | 0.027<br>±0.034                | 0.013<br>±0.034  | -0.016<br>±0.040 | 0.006<br>±0.032                | 0.007<br>±0.032  | <b>0.045</b><br>± <b>0.034</b> | 0.013<br>±0.041 | -0.003<br>±0.021 | 0.016<br>±0.034  | 0.026<br>±0.033  | 0.007<br>±0.040  | 0.012<br>±0.034   | 0.002<br>±0.041   | 0.009<br>±0.018   | 0.010<br>±0.019   | 0.004<br>±0.026   | 0.008<br>±0.023   |
| sub8    | AUC      | 0.530<br>±0.027                | 0.513<br>±0.024 | 0.538<br>± 0.025 | 0.533<br>±0.018                | 0.504<br>±0.025  | 0.490<br>±0.024  | 0.507<br>±0.019                | 0.503<br>±0.028  | <b>0.538</b><br>± <b>0.023</b> | 0.513<br>±0.020 | 0.512<br>±0.016  | 0.504<br>±0.024  | 0.518<br>±0.023  | 0.510<br>±0.021  | 0.512<br>±0.017   | 0.509<br>±0.028   | 0.511<br>±0.017   | 0.512<br>±0.025   | 0.510<br>±0.013   | 0.497<br>±0.019   |
|         | BAcc     | 0.283<br>±0.024                | 0.266<br>±0.034 | 0.285<br>± 0.021 | 0.270<br>±0.025                | 0.259<br>±0.026  | 0.238<br>±0.030  | 0.255<br>±0.024                | 0.255<br>±0.024  | <b>0.283</b><br>± <b>0.026</b> | 0.260<br>±0.031 | 0.248<br>±0.016  | 0.262<br>±0.026  | 0.269<br>±0.025  | 0.255<br>±0.030  | 0.259<br>±0.025   | 0.252<br>±0.030   | 0.257<br>±0.014   | 0.258<br>±0.014   | 0.253<br>±0.020   | 0.256<br>±0.017   |
|         | Acc.1    | 0.283<br>±0.024                | 0.266<br>±0.034 | 0.285<br>± 0.021 | 0.270<br>±0.025                | 0.259<br>±0.025  | 0.238<br>±0.030  | 0.255<br>±0.024                | 0.255<br>±0.024  | <b>0.284</b><br>± <b>0.026</b> | 0.260<br>±0.030 | 0.248<br>±0.016  | 0.262<br>±0.026  | 0.270<br>±0.025  | 0.255<br>±0.028  | 0.259<br>±0.026   | 0.251<br>±0.030   | 0.257<br>±0.014   | 0.257<br>±0.014   | 0.262<br>±0.046   | 0.256<br>±0.018   |
|         | Acc.2    | 0.534<br>±0.033                | 0.506<br>±0.037 | 0.521<br>±0.025  | <b>0.535</b><br>± <b>0.023</b> | 0.498<br>±0.022  | 0.495<br>±0.031  | 0.514<br>±0.012                | 0.514<br>±0.038  | 0.547<br>± 0.020               | 0.506<br>±0.016 | 0.515<br>±0.030  | 0.487<br>±0.033  | 0.522<br>±0.027  | 0.516<br>±0.024  | 0.498<br>±0.027   | 0.499<br>±0.028   | 0.511<br>±0.017   | 0.520<br>±0.030   | 0.517<br>±0.025   | 0.498<br>±0.016   |
|         | $\kappa$ | 0.017<br>±0.030                | 0.002<br>±0.025 | 0.011<br>±0.033  | <b>0.020</b><br>± <b>0.030</b> | 0.016<br>±0.032  | 0.012<br>±0.032  | 0.016<br>±0.033                | 0.024<br>± 0.046 | 0.014<br>±0.030                | 0.012<br>±0.036 | 0.011<br>±0.033  | -0.008<br>±0.030 | 0.018<br>±0.034  | 0.004<br>±0.041  | 0.003<br>±0.030   | 0.009<br>±0.027   | 0.004<br>±0.024   | -0.003<br>±0.027  | -0.010<br>±0.025  | 0.015<br>±0.018   |
| sub9    | AUC      | 0.517<br>± 0.019               | 0.497<br>±0.020 | 0.510<br>±0.020  | 0.506<br>±0.021                | 0.504<br>±0.017  | 0.513<br>±0.019  | <b>0.514</b><br>± <b>0.018</b> | 0.512<br>±0.030  | 0.511<br>±0.017                | 0.503<br>±0.019 | 0.503<br>±0.020  | 0.509<br>±0.012  | 0.509<br>±0.028  | 0.512<br>±0.023  | 0.508<br>±0.020   | 0.501<br>±0.022   | 0.497<br>±0.029   | 0.501<br>±0.024   | 0.496<br>±0.029   | 0.499<br>±0.022   |

Continued on next page

|         |        | 4575<br>4576<br>4577<br>4578<br>4579<br>4580<br>4581<br>4582<br>4583<br>4584<br>4585<br>4586<br>4587<br>4588<br>4589<br>4590<br>4591<br>4592<br>4593<br>4594<br>4595<br>4596<br>4597<br>4598<br>4599<br>4600<br>4601<br>4602<br>4603<br>4604<br>4605<br>4606<br>4607 |        |           |        |          |          |           |           |             |             |           |           |            |            |                   |                   |                   |                   |                   |                   |
|---------|--------|----------------------------------------------------------------------------------------------------------------------------------------------------------------------------------------------------------------------------------------------------------------------|--------|-----------|--------|----------|----------|-----------|-----------|-------------|-------------|-----------|-----------|------------|------------|-------------------|-------------------|-------------------|-------------------|-------------------|-------------------|
| Subject | Metric | DeepConvnet                                                                                                                                                                                                                                                          | EEGNet | Conformer | CTNet  | BIOT (f) | BIOT (l) | BENDR (f) | BENDR (l) | CBraMod (f) | CBraMod (l) | EEGPT (f) | EEGPT (l) | LaBraM (f) | LaBraM (l) | STEEGformer-s (f) | STEEGformer-s (l) | STEEGformer-b (f) | STEEGformer-b (l) | STEEGformer-l (f) | STEEGformer-l (l) |
| BAcc    | 0.263  | 0.251                                                                                                                                                                                                                                                                | 0.258  | 0.265     | 0.262  | 0.259    | 0.262    | 0.268     | ± 0.034   | 0.261       | 0.259       | 0.258     | 0.244     | 0.264      | 0.253      | 0.252             | 0.257             | 0.253             | 0.247             | 0.243             | 0.261             |
|         | ±0.022 | ±0.019                                                                                                                                                                                                                                                               | ±0.024 | ± 0.023   | ±0.024 | ±0.024   | ±0.025   |           |           | ±0.023      | ±0.027      | ±0.025    | ±0.023    | ±0.026     | ±0.030     | ±0.022            | ±0.020            | ±0.018            | ±0.020            | ±0.018            | ±0.018            |
| Acc.1   | 0.263  | 0.251                                                                                                                                                                                                                                                                | 0.258  | 0.265     | 0.262  | 0.259    | 0.262    | 0.268     | ± 0.034   | 0.261       | 0.258       | 0.258     | 0.244     | 0.263      | 0.251      | 0.252             | 0.258             | 0.253             | 0.248             | 0.246             | 0.261             |
|         | ±0.022 | ±0.019                                                                                                                                                                                                                                                               | ±0.024 | ± 0.023   | ±0.024 | ±0.024   | ±0.024   |           |           | ±0.023      | ±0.026      | ±0.025    | ±0.023    | ±0.026     | ±0.032     | ±0.022            | ±0.020            | ±0.018            | ±0.020            | ±0.020            | ±0.020            |
| Acc.2   | 0.514  | 0.489                                                                                                                                                                                                                                                                | 0.508  | 0.502     | 0.499  | 0.512    | 0.512    | 0.521     | ± 0.030   | 0.506       | 0.514       | 0.507     | 0.496     | 0.508      | 0.505      | 0.517             | 0.495             | 0.496             | 0.498             | 0.490             | 0.504             |
|         | ±0.028 | ±0.023                                                                                                                                                                                                                                                               | ±0.026 | ±0.018    | ±0.036 | ±0.022   | ±0.018   |           |           | ±0.015      | ±0.022      | ±0.025    | ±0.020    | ±0.032     | ±0.035     | ± 0.016           | ±0.024            | ±0.029            | ±0.018            | ±0.031            | ±0.020            |

## E.3 LEAVE-ONE-OUT RESULTS

## E.3.1 LEAVE-ONE-OUT ZERO-SHOT EVALUATION

Table 45: Average Leave-One-Out Zero-Shot Performance Across All Subjects.

| Model (Training strategy) | $\kappa$                    | AUC                         | BAcc                        | Acc.1                       | Acc.2                       |
|---------------------------|-----------------------------|-----------------------------|-----------------------------|-----------------------------|-----------------------------|
| <b>DeepConvnet</b>        | <b>0.054</b><br>$\pm 0.037$ | <b>0.547</b><br>$\pm 0.021$ | <b>0.290</b><br>$\pm 0.027$ | <b>0.291</b><br>$\pm 0.028$ | 0.555<br>$\pm 0.022$        |
| <b>EEGNet</b>             | 0.042<br>$\pm 0.031$        | 0.534<br>$\pm 0.022$        | 0.282<br>$\pm 0.023$        | 0.282<br>$\pm 0.024$        | 0.537<br>$\pm 0.032$        |
| <b>Conformer</b>          | 0.066<br>$\pm 0.044$        | 0.548<br>$\pm 0.023$        | 0.299<br>$\pm 0.033$        | 0.299<br>$\pm 0.033$        | <b>0.549</b><br>$\pm 0.034$ |
| <b>CTNet</b>              | 0.047<br>$\pm 0.045$        | 0.539<br>$\pm 0.021$        | 0.285<br>$\pm 0.034$        | 0.285<br>$\pm 0.034$        | 0.532<br>$\pm 0.026$        |
| <b>BIOT (f)</b>           | -0.002<br>$\pm 0.031$       | 0.502<br>$\pm 0.024$        | 0.249<br>$\pm 0.023$        | 0.249<br>$\pm 0.023$        | 0.495<br>$\pm 0.026$        |
| <b>BIOT (l)</b>           | 0.042<br>$\pm 0.047$        | 0.504<br>$\pm 0.027$        | 0.248<br>$\pm 0.036$        | 0.248<br>$\pm 0.035$        | 0.506<br>$\pm 0.026$        |
| <b>BENDR (f)</b>          | 0.019<br>$\pm 0.040$        | 0.523<br>$\pm 0.020$        | 0.264<br>$\pm 0.030$        | 0.264<br>$\pm 0.030$        | 0.526<br>$\pm 0.021$        |
| <b>BENDR (l)</b>          | 0.005<br>$\pm 0.027$        | 0.499<br>$\pm 0.026$        | 0.254<br>$\pm 0.020$        | 0.254<br>$\pm 0.020$        | 0.493<br>$\pm 0.042$        |
| <b>CBraMod (f)</b>        | 0.049<br>$\pm 0.040$        | 0.542<br>$\pm 0.019$        | 0.286<br>$\pm 0.030$        | 0.286<br>$\pm 0.030$        | 0.547<br>$\pm 0.032$        |
| <b>CBraMod (l)</b>        | 0.037<br>$\pm 0.029$        | 0.529<br>$\pm 0.015$        | 0.278<br>$\pm 0.022$        | 0.278<br>$\pm 0.022$        | 0.525<br>$\pm 0.016$        |
| <b>EEGPT (f)</b>          | 0.013<br>$\pm 0.030$        | 0.506<br>$\pm 0.012$        | 0.260<br>$\pm 0.022$        | 0.260<br>$\pm 0.022$        | 0.503<br>$\pm 0.029$        |
| <b>EEGPT (l)</b>          | 0.025<br>$\pm 0.036$        | 0.517<br>$\pm 0.018$        | 0.268<br>$\pm 0.027$        | 0.269<br>$\pm 0.027$        | 0.517<br>$\pm 0.035$        |
| <b>LaBraM (f)</b>         | 0.026<br>$\pm 0.025$        | 0.513<br>$\pm 0.017$        | 0.269<br>$\pm 0.019$        | 0.269<br>$\pm 0.019$        | 0.506<br>$\pm 0.024$        |
| <b>LaBraM (l)</b>         | 0.037<br>$\pm 0.027$        | 0.526<br>$\pm 0.022$        | 0.278<br>$\pm 0.020$        | 0.278<br>$\pm 0.021$        | 0.530<br>$\pm 0.038$        |
| <b>STEEGformer-s (f)</b>  | 0.015<br>$\pm 0.037$        | 0.509<br>$\pm 0.016$        | 0.261<br>$\pm 0.027$        | 0.261<br>$\pm 0.028$        | 0.522<br>$\pm 0.032$        |
| <b>STEEGformer-s (l)</b>  | 0.016<br>$\pm 0.028$        | 0.508<br>$\pm 0.017$        | 0.262<br>$\pm 0.021$        | 0.262<br>$\pm 0.020$        | 0.498<br>$\pm 0.028$        |
| <b>STEEGformer-b (f)</b>  | 0.001<br>$\pm 0.023$        | 0.516<br>$\pm 0.019$        | 0.251<br>$\pm 0.017$        | 0.251<br>$\pm 0.017$        | 0.503<br>$\pm 0.021$        |
| <b>STEEGformer-b (l)</b>  | 0.009<br>$\pm 0.026$        | 0.516<br>$\pm 0.022$        | 0.256<br>$\pm 0.019$        | 0.256<br>$\pm 0.019$        | 0.513<br>$\pm 0.018$        |
| <b>STEEGformer-l (f)</b>  | 0.010<br>$\pm 0.030$        | 0.518<br>$\pm 0.020$        | 0.258<br>$\pm 0.022$        | 0.254<br>$\pm 0.030$        | 0.514<br>$\pm 0.049$        |
| <b>STEEGformer-l (l)</b>  | -0.006<br>$\pm 0.018$       | 0.498<br>$\pm 0.015$        | 0.246<br>$\pm 0.013$        | 0.245<br>$\pm 0.013$        | 0.505<br>$\pm 0.025$        |

Table 46: Per-Subject Leave-One-Out Zero-Shot Performance.

| Subject | Metric           | DeepConvnet                 | EEGNet                      | Conformer                   | CTNet                       | BIOT (f)              | BIOT (l)              | BENDR (f)                   | BENDR (l)             | CBraMod (f)           | CBraMod (l)                 | EEGPT (f)             | EEGPT (l)                   | LaBraM (f)            | LaBraM (l)                  | STEEGformer-s (f)     | STEEGformer-s (l)     | STEEGformer-b (f)     | STEEGformer-b (l)     | STEEGformer-l (f)           | STEEGformer-l (l)     |
|---------|------------------|-----------------------------|-----------------------------|-----------------------------|-----------------------------|-----------------------|-----------------------|-----------------------------|-----------------------|-----------------------|-----------------------------|-----------------------|-----------------------------|-----------------------|-----------------------------|-----------------------|-----------------------|-----------------------|-----------------------|-----------------------------|-----------------------|
| sub1    | $\kappa$         | 0.047<br>$\pm 0.130$        | 0.073<br>$\pm 0.043$        | 0.073<br>$\pm 0.083$        | 0.120<br>$\pm 0.045$        | -0.033<br>$\pm 0.058$ | -0.100<br>$\pm 0.067$ | <b>0.113</b><br>$\pm 0.150$ | 0.033<br>$\pm 0.091$  | 0.087<br>$\pm 0.112$  | 0.020<br>$\pm 0.073$        | -0.007<br>$\pm 0.068$ | 0.060<br>$\pm 0.083$        | 0.020<br>$\pm 0.087$  | 0.013<br>$\pm 0.073$        | 0.000<br>$\pm 0.105$  | 0.053<br>$\pm 0.065$  | 0.013<br>$\pm 0.090$  | -0.013<br>$\pm 0.080$ | -0.020<br>$\pm 0.069$       | 0.020<br>$\pm 0.084$  |
|         | AUC              | <b>0.573</b><br>$\pm 0.086$ | 0.581<br>$\pm 0.033$        | 0.551<br>$\pm 0.058$        | 0.561<br>$\pm 0.036$        | 0.525<br>$\pm 0.016$  | 0.474<br>$\pm 0.044$  | 0.566<br>$\pm 0.091$        | 0.541<br>$\pm 0.058$  | 0.547<br>$\pm 0.066$  | 0.524<br>$\pm 0.054$        | 0.499<br>$\pm 0.061$  | 0.512<br>$\pm 0.017$        | 0.516<br>$\pm 0.026$  | 0.531<br>$\pm 0.027$        | 0.508<br>$\pm 0.069$  | 0.500<br>$\pm 0.054$  | 0.526<br>$\pm 0.050$  | 0.524<br>$\pm 0.051$  | 0.495<br>$\pm 0.037$        | 0.488<br>$\pm 0.063$  |
|         | BAcc             | 0.285<br>$\pm 0.098$        | 0.305<br>$\pm 0.033$        | 0.305<br>$\pm 0.062$        | 0.340<br>$\pm 0.034$        | 0.225<br>$\pm 0.043$  | 0.175<br>$\pm 0.050$  | <b>0.335</b><br>$\pm 0.113$ | 0.275<br>$\pm 0.068$  | 0.315<br>$\pm 0.084$  | 0.265<br>$\pm 0.055$        | 0.245<br>$\pm 0.051$  | 0.295<br>$\pm 0.062$        | 0.265<br>$\pm 0.065$  | 0.260<br>$\pm 0.055$        | 0.250<br>$\pm 0.079$  | 0.290<br>$\pm 0.049$  | 0.260<br>$\pm 0.068$  | 0.240<br>$\pm 0.060$  | 0.235<br>$\pm 0.052$        | 0.265<br>$\pm 0.063$  |
|         | Acc <sub>1</sub> | 0.285<br>$\pm 0.098$        | 0.305<br>$\pm 0.033$        | 0.305<br>$\pm 0.062$        | 0.340<br>$\pm 0.034$        | 0.225<br>$\pm 0.043$  | 0.175<br>$\pm 0.050$  | <b>0.335</b><br>$\pm 0.113$ | 0.275<br>$\pm 0.068$  | 0.315<br>$\pm 0.084$  | 0.265<br>$\pm 0.055$        | 0.245<br>$\pm 0.051$  | 0.295<br>$\pm 0.062$        | 0.265<br>$\pm 0.065$  | 0.260<br>$\pm 0.055$        | 0.250<br>$\pm 0.079$  | 0.290<br>$\pm 0.049$  | 0.260<br>$\pm 0.068$  | 0.240<br>$\pm 0.060$  | 0.231<br>$\pm 0.082$        | 0.265<br>$\pm 0.063$  |
|         | Acc <sub>2</sub> | 0.595<br>$\pm 0.082$        | 0.570<br>$\pm 0.072$        | <b>0.585</b><br>$\pm 0.072$ | 0.545<br>$\pm 0.069$        | 0.550<br>$\pm 0.047$  | 0.485<br>$\pm 0.052$  | 0.560<br>$\pm 0.108$        | 0.570<br>$\pm 0.045$  | 0.570<br>$\pm 0.041$  | 0.535<br>$\pm 0.060$        | 0.495<br>$\pm 0.089$  | 0.505<br>$\pm 0.033$        | 0.505<br>$\pm 0.089$  | 0.530<br>$\pm 0.060$        | 0.535<br>$\pm 0.042$  | 0.470<br>$\pm 0.076$  | 0.470<br>$\pm 0.082$  | 0.500<br>$\pm 0.064$  | 0.459<br>$\pm 0.114$        | 0.490<br>$\pm 0.084$  |
| sub10   | $\kappa$         | 0.061<br>$\pm 0.135$        | 0.011<br>$\pm 0.109$        | 0.128<br>$\pm 0.061$        | 0.017<br>$\pm 0.080$        | -0.022<br>$\pm 0.105$ | -0.044<br>$\pm 0.105$ | 0.033<br>$\pm 0.084$        | 0.028<br>$\pm 0.081$  | 0.067<br>$\pm 0.134$  | <b>0.083</b><br>$\pm 0.098$ | -0.056<br>$\pm 0.081$ | -0.011<br>$\pm 0.064$       | -0.006<br>$\pm 0.046$ | 0.028<br>$\pm 0.071$        | 0.017<br>$\pm 0.112$  | 0.011<br>$\pm 0.078$  | 0.050<br>$\pm 0.060$  | -0.011<br>$\pm 0.042$ | 0.028<br>$\pm 0.086$        | -0.044<br>$\pm 0.050$ |
|         | AUC              | 0.538<br>$\pm 0.087$        | 0.498<br>$\pm 0.072$        | <b>0.548</b><br>$\pm 0.052$ | 0.523<br>$\pm 0.046$        | 0.484<br>$\pm 0.063$  | 0.488<br>$\pm 0.070$  | 0.504<br>$\pm 0.052$        | 0.516<br>$\pm 0.036$  | 0.559<br>$\pm 0.057$  | 0.546<br>$\pm 0.053$        | 0.484<br>$\pm 0.044$  | 0.528<br>$\pm 0.047$        | 0.494<br>$\pm 0.040$  | 0.510<br>$\pm 0.021$        | 0.514<br>$\pm 0.064$  | 0.509<br>$\pm 0.033$  | 0.543<br>$\pm 0.028$  | 0.502<br>$\pm 0.026$  | 0.516<br>$\pm 0.032$        | 0.494<br>$\pm 0.038$  |
|         | BAcc             | 0.296<br>$\pm 0.101$        | 0.258<br>$\pm 0.081$        | 0.346<br>$\pm 0.046$        | 0.262<br>$\pm 0.060$        | 0.233<br>$\pm 0.079$  | 0.217<br>$\pm 0.079$  | 0.275<br>$\pm 0.063$        | 0.271<br>$\pm 0.061$  | 0.300<br>$\pm 0.101$  | <b>0.312</b><br>$\pm 0.074$ | 0.208<br>$\pm 0.061$  | 0.242<br>$\pm 0.048$        | 0.246<br>$\pm 0.034$  | 0.271<br>$\pm 0.053$        | 0.262<br>$\pm 0.084$  | 0.258<br>$\pm 0.058$  | 0.287<br>$\pm 0.045$  | 0.242<br>$\pm 0.032$  | 0.271<br>$\pm 0.064$        | 0.217<br>$\pm 0.038$  |
|         | Acc <sub>1</sub> | 0.296<br>$\pm 0.101$        | 0.258<br>$\pm 0.081$        | 0.346<br>$\pm 0.046$        | 0.263<br>$\pm 0.060$        | 0.233<br>$\pm 0.079$  | 0.217<br>$\pm 0.079$  | 0.275<br>$\pm 0.063$        | 0.271<br>$\pm 0.061$  | 0.300<br>$\pm 0.101$  | <b>0.312</b><br>$\pm 0.074$ | 0.208<br>$\pm 0.061$  | 0.242<br>$\pm 0.048$        | 0.246<br>$\pm 0.034$  | 0.271<br>$\pm 0.053$        | 0.263<br>$\pm 0.084$  | 0.254<br>$\pm 0.054$  | 0.287<br>$\pm 0.045$  | 0.242<br>$\pm 0.032$  | 0.278<br>$\pm 0.052$        | 0.217<br>$\pm 0.038$  |
|         | Acc <sub>2</sub> | 0.525<br>$\pm 0.113$        | 0.454<br>$\pm 0.060$        | 0.571<br>$\pm 0.079$        | 0.517<br>$\pm 0.061$        | 0.450<br>$\pm 0.024$  | 0.483<br>$\pm 0.056$  | 0.500<br>$\pm 0.091$        | 0.542<br>$\pm 0.061$  | 0.558<br>$\pm 0.090$  | 0.558<br>$\pm 0.083$        | 0.450<br>$\pm 0.058$  | <b>0.562</b><br>$\pm 0.042$ | 0.471<br>$\pm 0.050$  | 0.546<br>$\pm 0.027$        | 0.554<br>$\pm 0.070$  | 0.483<br>$\pm 0.070$  | 0.533<br>$\pm 0.062$  | 0.500<br>$\pm 0.066$  | <b>0.562</b><br>$\pm 0.095$ | 0.471<br>$\pm 0.038$  |
| sub2    | $\kappa$         | 0.083<br>$\pm 0.052$        | <b>0.078</b><br>$\pm 0.129$ | 0.039<br>$\pm 0.093$        | 0.083<br>$\pm 0.039$        | -0.050<br>$\pm 0.066$ | 0.056<br>$\pm 0.111$  | 0.006<br>$\pm 0.057$        | -0.006<br>$\pm 0.075$ | -0.039<br>$\pm 0.089$ | 0.017<br>$\pm 0.058$        | 0.056<br>$\pm 0.079$  | 0.044<br>$\pm 0.070$        | 0.044<br>$\pm 0.054$  | 0.078<br>$\pm 0.063$        | -0.044<br>$\pm 0.107$ | -0.006<br>$\pm 0.080$ | -0.044<br>$\pm 0.087$ | -0.039<br>$\pm 0.080$ | 0.011<br>$\pm 0.075$        | 0.006<br>$\pm 0.091$  |
|         | AUC              | 0.568<br>$\pm 0.044$        | 0.537<br>$\pm 0.054$        | 0.533<br>$\pm 0.049$        | 0.547<br>$\pm 0.041$        | 0.466<br>$\pm 0.045$  | 0.514<br>$\pm 0.050$  | 0.533<br>$\pm 0.025$        | 0.499<br>$\pm 0.047$  | 0.514<br>$\pm 0.069$  | 0.513<br>$\pm 0.038$        | 0.519<br>$\pm 0.054$  | 0.543<br>$\pm 0.047$        | 0.531<br>$\pm 0.064$  | <b>0.566</b><br>$\pm 0.060$ | 0.486<br>$\pm 0.045$  | 0.475<br>$\pm 0.041$  | 0.483<br>$\pm 0.060$  | 0.470<br>$\pm 0.048$  | 0.516<br>$\pm 0.049$        | 0.510<br>$\pm 0.053$  |
|         | BAcc             | 0.312<br>$\pm 0.039$        | 0.308<br>$\pm 0.097$        | 0.279<br>$\pm 0.070$        | <b>0.312</b><br>$\pm 0.029$ | 0.212<br>$\pm 0.050$  | 0.292<br>$\pm 0.083$  | 0.254<br>$\pm 0.043$        | 0.246<br>$\pm 0.056$  | 0.221<br>$\pm 0.067$  | 0.262<br>$\pm 0.043$        | 0.292<br>$\pm 0.059$  | 0.283<br>$\pm 0.052$        | 0.308<br>$\pm 0.041$  | 0.217<br>$\pm 0.048$        | 0.246<br>$\pm 0.080$  | 0.217<br>$\pm 0.060$  | 0.217<br>$\pm 0.065$  | 0.221<br>$\pm 0.060$  | 0.258<br>$\pm 0.056$        | 0.254<br>$\pm 0.068$  |
|         | Acc <sub>1</sub> | 0.312<br>$\pm 0.039$        | <b>0.308</b><br>$\pm 0.097$ | 0.279<br>$\pm 0.070$        | 0.312<br>$\pm 0.029$        | 0.212<br>$\pm 0.050$  | 0.292<br>$\pm 0.083$  | 0.254<br>$\pm 0.043$        | 0.246<br>$\pm 0.056$  | 0.221<br>$\pm 0.067$  | 0.263<br>$\pm 0.043$        | 0.292<br>$\pm 0.059$  | 0.283<br>$\pm 0.052$        | 0.283<br>$\pm 0.041$  | <b>0.308</b><br>$\pm 0.048$ | 0.217<br>$\pm 0.080$  | 0.250<br>$\pm 0.057$  | 0.217<br>$\pm 0.065$  | 0.221<br>$\pm 0.060$  | 0.263<br>$\pm 0.065$        | 0.254<br>$\pm 0.068$  |
|         | Acc <sub>2</sub> | <b>0.579</b><br>$\pm 0.084$ | 0.533<br>$\pm 0.087$        | 0.542<br>$\pm 0.082$        | 0.554<br>$\pm 0.079$        | 0.475<br>$\pm 0.034$  | 0.500<br>$\pm 0.078$  | 0.521<br>$\pm 0.061$        | 0.475<br>$\pm 0.058$  | 0.517<br>$\pm 0.080$  | 0.525<br>$\pm 0.056$        | 0.529<br>$\pm 0.064$  | 0.567<br>$\pm 0.071$        | 0.533<br>$\pm 0.067$  | 0.583<br>$\pm 0.061$        | 0.479<br>$\pm 0.075$  | 0.446<br>$\pm 0.068$  | 0.500<br>$\pm 0.042$  | 0.483<br>$\pm 0.048$  | 0.553<br>$\pm 0.069$        | 0.542<br>$\pm 0.081$  |

Continued on next page

| Subject                | Metric   | DeepConvnet            | EEGNet                 | Conformer                   | CTNet                       | BIOT (f)                    | BIOT (f)                    | BENDR (f)              | BENDR (f)             | CBraMod (f)                 | CBraMod (f)            | EEGPT (f)             | EEGPT (f)              | LaBraM (f)            | LaBraM (f)                  | STEGformer-s (f)            | STEGformer-s (f)       | STEGformer-b (f)      | STEGformer-b (f)      | STEGformer-l (f)            | STEGformer-l (f)            |
|------------------------|----------|------------------------|------------------------|-----------------------------|-----------------------------|-----------------------------|-----------------------------|------------------------|-----------------------|-----------------------------|------------------------|-----------------------|------------------------|-----------------------|-----------------------------|-----------------------------|------------------------|-----------------------|-----------------------|-----------------------------|-----------------------------|
| sub3                   | $\kappa$ | -0.044<br>$\pm 0.124$  | -0.022<br>$\pm 0.062$  | 0.007<br>$\pm 0.176$        | -0.037<br>$\pm 0.087$       | -0.015<br>$\pm 0.067$       | <b>0.059</b><br>$\pm 0.085$ | 0.015<br>$\pm 0.093$   | -0.022<br>$\pm 0.042$ | 0.037<br>$\pm 0.069$        | 0.030<br>$\pm 0.076$   | 0.015<br>$\pm 0.150$  | $0.059$<br>$\pm 0.110$ | -0.007<br>$\pm 0.048$ | 0.037<br>$\pm 0.111$        | -0.037<br>$\pm 0.037$       | 0.000<br>$\pm 0.037$   | -0.007<br>$\pm 0.096$ | 0.015<br>$\pm 0.067$  | -0.030<br>$\pm 0.061$       | 0.000<br>$\pm 0.052$        |
|                        | AUC      | 0.500<br>$\pm 0.070$   | 0.510<br>$\pm 0.084$   | 0.523<br>$\pm 0.126$        | 0.535<br>$\pm 0.075$        | 0.469<br>$\pm 0.037$        | $0.569$<br>$\pm 0.038$      | 0.536<br>$\pm 0.065$   | 0.468<br>$\pm 0.033$  | <b>0.543</b><br>$\pm 0.029$ | 0.503<br>$\pm 0.054$   | 0.498<br>$\pm 0.054$  | 0.515<br>$\pm 0.069$   | 0.474<br>$\pm 0.052$  | 0.530<br>$\pm 0.077$        | 0.487<br>$\pm 0.035$        | 0.503<br>$\pm 0.047$   | 0.499<br>$\pm 0.065$  | 0.514<br>$\pm 0.049$  | 0.493<br>$\pm 0.049$        | 0.490<br>$\pm 0.035$        |
|                        | BAcc     | 0.217<br>$\pm 0.093$   | 0.233<br>$\pm 0.046$   | 0.256<br>$\pm 0.132$        | 0.222<br>$\pm 0.065$        | 0.239<br>$\pm 0.050$        | $0.294$<br>$\pm 0.064$      | 0.261<br>$\pm 0.070$   | 0.233<br>$\pm 0.032$  | <b>0.278</b><br>$\pm 0.052$ | 0.272<br>$\pm 0.057$   | 0.261<br>$\pm 0.112$  | $0.294$<br>$\pm 0.082$ | 0.244<br>$\pm 0.036$  | 0.278<br>$\pm 0.083$        | 0.222<br>$\pm 0.028$        | 0.250<br>$\pm 0.028$   | 0.244<br>$\pm 0.072$  | 0.261<br>$\pm 0.050$  | 0.228<br>$\pm 0.046$        | 0.250<br>$\pm 0.039$        |
|                        | Acc_1    | 0.217<br>$\pm 0.093$   | 0.233<br>$\pm 0.046$   | 0.256<br>$\pm 0.132$        | 0.222<br>$\pm 0.065$        | 0.239<br>$\pm 0.050$        | $0.294$<br>$\pm 0.064$      | 0.261<br>$\pm 0.070$   | 0.233<br>$\pm 0.032$  | <b>0.278</b><br>$\pm 0.052$ | 0.272<br>$\pm 0.057$   | 0.261<br>$\pm 0.112$  | $0.294$<br>$\pm 0.082$ | 0.244<br>$\pm 0.036$  | <b>0.278</b><br>$\pm 0.083$ | 0.222<br>$\pm 0.028$        | 0.250<br>$\pm 0.028$   | 0.244<br>$\pm 0.072$  | 0.261<br>$\pm 0.050$  | 0.216<br>$\pm 0.064$        | 0.250<br>$\pm 0.039$        |
|                        | Acc_2    | 0.533<br>$\pm 0.084$   | 0.528<br>$\pm 0.039$   | 0.478<br>$\pm 0.093$        | 0.517<br>$\pm 0.042$        | 0.500<br>$\pm 0.044$        | 0.544<br>$\pm 0.042$        | $0.561$<br>$\pm 0.036$ | 0.456<br>$\pm 0.042$  | 0.522<br>$\pm 0.087$        | 0.494<br>$\pm 0.093$   | 0.467<br>$\pm 0.084$  | 0.472<br>$\pm 0.092$   | 0.456<br>$\pm 0.050$  | <b>0.550</b><br>$\pm 0.060$ | 0.461<br>$\pm 0.080$        | 0.528<br>$\pm 0.020$   | 0.511<br>$\pm 0.054$  | 0.522<br>$\pm 0.046$  | 0.459<br>$\pm 0.064$        | 0.506<br>$\pm 0.077$        |
|                        | sub4     | $\kappa$               | $0.100$<br>$\pm 0.064$ | 0.061<br>$\pm 0.084$        | 0.039<br>$\pm 0.064$        | 0.056<br>$\pm 0.092$        | 0.011<br>$\pm 0.058$        | -0.044<br>$\pm 0.064$  | -0.006<br>$\pm 0.091$ | 0.044<br>$\pm 0.093$        | 0.044<br>$\pm 0.109$   | 0.039<br>$\pm 0.082$  | 0.017<br>$\pm 0.085$   | 0.061<br>$\pm 0.053$  | 0.044<br>$\pm 0.122$        | 0.067<br>$\pm 0.080$        | 0.056<br>$\pm 0.135$   | -0.006<br>$\pm 0.036$ | -0.006<br>$\pm 0.072$ | 0.022<br>$\pm 0.095$        | <b>0.078</b><br>$\pm 0.101$ |
| AUC                    |          | $0.568$<br>$\pm 0.056$ | 0.541<br>$\pm 0.038$   | <b>0.563</b><br>$\pm 0.031$ | 0.555<br>$\pm 0.061$        | 0.483<br>$\pm 0.052$        | 0.508<br>$\pm 0.032$        | 0.530<br>$\pm 0.045$   | 0.530<br>$\pm 0.061$  | 0.544<br>$\pm 0.067$        | 0.546<br>$\pm 0.037$   | 0.524<br>$\pm 0.039$  | 0.540<br>$\pm 0.037$   | 0.505<br>$\pm 0.081$  | 0.560<br>$\pm 0.076$        | 0.530<br>$\pm 0.057$        | 0.518<br>$\pm 0.053$   | 0.520<br>$\pm 0.065$  | 0.520<br>$\pm 0.043$  | 0.558<br>$\pm 0.062$        | 0.503<br>$\pm 0.071$        |
| BAcc                   |          | $0.325$<br>$\pm 0.048$ | 0.296<br>$\pm 0.063$   | 0.279<br>$\pm 0.048$        | 0.292<br>$\pm 0.069$        | 0.258<br>$\pm 0.043$        | 0.217<br>$\pm 0.048$        | 0.246<br>$\pm 0.068$   | 0.283<br>$\pm 0.070$  | 0.283<br>$\pm 0.081$        | 0.279<br>$\pm 0.062$   | 0.263<br>$\pm 0.064$  | 0.296<br>$\pm 0.040$   | 0.283<br>$\pm 0.092$  | 0.300<br>$\pm 0.060$        | 0.292<br>$\pm 0.101$        | 0.246<br>$\pm 0.027$   | 0.246<br>$\pm 0.054$  | 0.267<br>$\pm 0.071$  | <b>0.308</b><br>$\pm 0.076$ | 0.258<br>$\pm 0.083$        |
| Acc_1                  |          | $0.325$<br>$\pm 0.048$ | 0.296<br>$\pm 0.063$   | 0.279<br>$\pm 0.048$        | 0.292<br>$\pm 0.069$        | 0.258<br>$\pm 0.043$        | 0.217<br>$\pm 0.048$        | 0.246<br>$\pm 0.068$   | 0.283<br>$\pm 0.070$  | 0.283<br>$\pm 0.081$        | 0.279<br>$\pm 0.062$   | 0.263<br>$\pm 0.064$  | 0.296<br>$\pm 0.040$   | 0.283<br>$\pm 0.092$  | 0.304<br>$\pm 0.068$        | 0.292<br>$\pm 0.101$        | 0.250<br>$\pm 0.029$   | 0.246<br>$\pm 0.054$  | 0.267<br>$\pm 0.071$  | <b>0.316</b><br>$\pm 0.072$ | 0.258<br>$\pm 0.083$        |
| Acc_2                  |          | 0.546<br>$\pm 0.048$   | 0.562<br>$\pm 0.033$   | 0.567<br>$\pm 0.060$        | 0.542<br>$\pm 0.075$        | 0.483<br>$\pm 0.048$        | 0.508<br>$\pm 0.073$        | 0.533<br>$\pm 0.056$   | 0.529<br>$\pm 0.070$  | 0.558<br>$\pm 0.070$        | 0.512<br>$\pm 0.032$   | 0.542<br>$\pm 0.074$  | 0.542<br>$\pm 0.051$   | 0.504<br>$\pm 0.104$  | $0.588$<br>$\pm 0.076$      | <b>0.567</b><br>$\pm 0.083$ | 0.525<br>$\pm 0.037$   | 0.479<br>$\pm 0.049$  | 0.529<br>$\pm 0.038$  | 0.566<br>$\pm 0.046$        | 0.512<br>$\pm 0.032$        |
| sub5                   |          | $\kappa$               | 0.067<br>$\pm 0.103$   | 0.039<br>$\pm 0.082$        | 0.022<br>$\pm 0.095$        | <b>0.106</b><br>$\pm 0.063$ | -0.028<br>$\pm 0.028$       | -0.022<br>$\pm 0.053$  | 0.017<br>$\pm 0.032$  | -0.011<br>$\pm 0.067$       | $0.111$<br>$\pm 0.044$ | 0.067<br>$\pm 0.067$  | 0.044<br>$\pm 0.089$   | 0.044<br>$\pm 0.109$  | 0.056<br>$\pm 0.076$        | -0.000<br>$\pm 0.083$       | 0.028<br>$\pm 0.111$   | 0.033<br>$\pm 0.072$  | -0.006<br>$\pm 0.072$ | 0.022<br>$\pm 0.030$        | 0.011<br>$\pm 0.128$        |
|                        | AUC      | 0.551<br>$\pm 0.065$   | 0.530<br>$\pm 0.067$   | 0.544<br>$\pm 0.067$        | $0.577$<br>$\pm 0.063$      | 0.502<br>$\pm 0.037$        | 0.469<br>$\pm 0.037$        | 0.508<br>$\pm 0.048$   | 0.487<br>$\pm 0.037$  | <b>0.571</b><br>$\pm 0.031$ | 0.525<br>$\pm 0.034$   | 0.521<br>$\pm 0.046$  | 0.518<br>$\pm 0.082$   | 0.528<br>$\pm 0.038$  | 0.514<br>$\pm 0.068$        | 0.524<br>$\pm 0.045$        | 0.521<br>$\pm 0.036$   | 0.487<br>$\pm 0.030$  | 0.513<br>$\pm 0.038$  | 0.541<br>$\pm 0.051$        | 0.498<br>$\pm 0.054$        |
|                        | BAcc     | 0.300<br>$\pm 0.077$   | 0.279<br>$\pm 0.062$   | 0.267<br>$\pm 0.071$        | <b>0.329</b><br>$\pm 0.048$ | 0.229<br>$\pm 0.021$        | 0.233<br>$\pm 0.040$        | 0.263<br>$\pm 0.024$   | 0.242<br>$\pm 0.050$  | $0.333$<br>$\pm 0.033$      | 0.300<br>$\pm 0.050$   | 0.283<br>$\pm 0.067$  | 0.283<br>$\pm 0.081$   | 0.292<br>$\pm 0.057$  | 0.250<br>$\pm 0.063$        | 0.271<br>$\pm 0.083$        | 0.275<br>$\pm 0.054$   | 0.246<br>$\pm 0.054$  | 0.267<br>$\pm 0.023$  | 0.258<br>$\pm 0.096$        | 0.237<br>$\pm 0.041$        |
|                        | Acc_1    | 0.300<br>$\pm 0.077$   | 0.279<br>$\pm 0.062$   | 0.267<br>$\pm 0.071$        | <b>0.329</b><br>$\pm 0.048$ | 0.229<br>$\pm 0.021$        | 0.233<br>$\pm 0.040$        | 0.263<br>$\pm 0.024$   | 0.242<br>$\pm 0.050$  | $0.333$<br>$\pm 0.033$      | 0.300<br>$\pm 0.050$   | 0.283<br>$\pm 0.067$  | 0.283<br>$\pm 0.081$   | 0.292<br>$\pm 0.057$  | 0.250<br>$\pm 0.062$        | 0.271<br>$\pm 0.083$        | 0.275<br>$\pm 0.054$   | 0.246<br>$\pm 0.054$  | 0.267<br>$\pm 0.023$  | 0.256<br>$\pm 0.092$        | 0.237<br>$\pm 0.041$        |
|                        | Acc_2    | 0.567<br>$\pm 0.081$   | 0.571<br>$\pm 0.081$   | 0.525<br>$\pm 0.054$        | <b>0.579</b><br>$\pm 0.092$ | 0.471<br>$\pm 0.070$        | 0.517<br>$\pm 0.050$        | 0.504<br>$\pm 0.086$   | 0.487<br>$\pm 0.076$  | $0.588$<br>$\pm 0.068$      | 0.517<br>$\pm 0.040$   | 0.521<br>$\pm 0.061$  | 0.492<br>$\pm 0.068$   | 0.525<br>$\pm 0.061$  | 0.483<br>$\pm 0.056$        | 0.517<br>$\pm 0.071$        | 0.517<br>$\pm 0.017$   | 0.475<br>$\pm 0.060$  | 0.508<br>$\pm 0.048$  | 0.516<br>$\pm 0.063$        | 0.517<br>$\pm 0.065$        |
|                        | sub6     | $\kappa$               | 0.066<br>$\pm 0.058$   | <b>0.083</b><br>$\pm 0.151$ | 0.055<br>$\pm 0.068$        | 0.043<br>$\pm 0.053$        | 0.037<br>$\pm 0.006$        | 0.025<br>$\pm 0.076$   | 0.061<br>$\pm 0.102$  | 0.005<br>$\pm 0.111$        | 0.055<br>$\pm 0.055$   | -0.023<br>$\pm 0.038$ | 0.019<br>$\pm 0.131$   | 0.006<br>$\pm 0.051$  | 0.062<br>$\pm 0.057$        | 0.020<br>$\pm 0.076$        | $0.085$<br>$\pm 0.081$ | -0.000<br>$\pm 0.038$ | 0.007<br>$\pm 0.091$  | -0.014<br>$\pm 0.061$       | 0.007<br>$\pm 0.120$        |
| Continued on next page |          |                        |                        |                             |                             |                             |                             |                        |                       |                             |                        |                       |                        |                       |                             |                             |                        |                       |                       |                             |                             |

Continued on next page

| Subject | Metric   | DeepConvnet                    | EEGNet                         | Conformer                      | CTNet           | BIOT (f)        | BIOT (l)        | BENDR (f)        | BENDR (l)        | CBraMod (f)                    | CBraMod (l)      | EEGPT (f)        | EEGPT (l)                      | LaBraM (f)                     | LaBraM (l)                     | STEEGformer-s (f) | STEEGformer-s (l)              | STEEGformer-b (f) | STEEGformer-b (l) | STEEGformer-l (f) | STEEGformer-l (l) |
|---------|----------|--------------------------------|--------------------------------|--------------------------------|-----------------|-----------------|-----------------|------------------|------------------|--------------------------------|------------------|------------------|--------------------------------|--------------------------------|--------------------------------|-------------------|--------------------------------|-------------------|-------------------|-------------------|-------------------|
|         |          |                                |                                |                                |                 |                 |                 |                  |                  |                                |                  |                  |                                |                                |                                |                   |                                |                   |                   |                   |                   |
|         | AUC      | 0.531<br>±0.031                | 0.516<br>±0.051                | 0.517<br>±0.040                | 0.524<br>±0.063 | 0.534<br>±0.057 | 0.486<br>±0.082 | 0.532<br>±0.079  | 0.487<br>±0.042  | 0.518<br>±0.046                | 0.513<br>±0.052  | 0.496<br>±0.049  | 0.496<br>±0.055                | <b>0.535</b><br>± <b>0.062</b> | 0.502<br>±0.042                | 0.528<br>±0.032   | 0.519<br>±0.051                | 0.517<br>±0.054   | 0.552<br>± 0.033  | 0.515<br>±0.058   | 0.508<br>±0.063   |
|         | BAcc     | 0.298<br>±0.043                | <b>0.310</b><br>± <b>0.114</b> | 0.291<br>±0.049                | 0.282<br>±0.040 | 0.280<br>±0.007 | 0.269<br>±0.058 | 0.296<br>±0.075  | 0.255<br>±0.083  | 0.292<br>±0.043                | 0.233<br>±0.028  | 0.264<br>±0.099  | 0.255<br>±0.038                | 0.297<br>±0.042                | 0.266<br>±0.058                | 0.314<br>± 0.061  | 0.250<br>±0.028                | 0.254<br>±0.068   | 0.240<br>±0.046   | 0.255<br>±0.090   | 0.251<br>±0.026   |
|         | Acc.1    | 0.301<br>±0.044                | <b>0.314</b><br>± <b>0.112</b> | 0.292<br>±0.051                | 0.283<br>±0.040 | 0.278<br>±0.003 | 0.268<br>±0.059 | 0.296<br>±0.076  | 0.255<br>±0.082  | 0.292<br>±0.041                | 0.232<br>±0.029  | 0.265<br>±0.098  | 0.255<br>±0.038                | 0.296<br>±0.045                | 0.264<br>±0.057                | 0.315<br>± 0.062  | 0.245<br>±0.035                | 0.255<br>±0.069   | 0.241<br>±0.047   | 0.267<br>±0.107   | 0.250<br>±0.019   |
|         | Acc.2    | 0.532<br>±0.037                | 0.532<br>±0.067                | 0.514<br>±0.054                | 0.523<br>±0.127 | 0.514<br>±0.087 | 0.472<br>±0.088 | 0.518<br>±0.050  | 0.472<br>±0.059  | <b>0.551</b><br>± <b>0.055</b> | 0.532<br>±0.043  | 0.514<br>±0.031  | 0.486<br>±0.095                | 0.500<br>±0.089                | 0.518<br>±0.046                | 0.547<br>±0.081   | 0.486<br>±0.065                | 0.528<br>±0.034   | 0.551<br>± 0.081  | 0.508<br>±0.098   | 0.477<br>±0.049   |
|         | $\kappa$ | 0.039<br>±0.064                | 0.028<br>±0.102                | <b>0.050</b><br>± <b>0.093</b> | 0.028<br>±0.104 | 0.022<br>±0.075 | 0.017<br>±0.061 | -0.017<br>±0.046 | 0.033<br>±0.103  | 0.044<br>±0.032                | 0.067<br>± 0.082 | 0.017<br>±0.064  | 0.011<br>±0.089                | 0.033<br>±0.091                | 0.006<br>±0.063                | 0.011<br>±0.089   | -0.011<br>±0.085               | -0.017<br>±0.061  | 0.017<br>±0.042   | -0.022<br>±0.093  | -0.017<br>±0.025  |
| sub7    | AUC      | <b>0.546</b><br>± <b>0.044</b> | 0.544<br>±0.030                | 0.532<br>±0.051                | 0.518<br>±0.060 | 0.507<br>±0.060 | 0.498<br>±0.059 | 0.519<br>±0.034  | 0.521<br>±0.052  | 0.547<br>± 0.048               | 0.543<br>±0.065  | 0.508<br>±0.069  | 0.511<br>±0.057                | 0.512<br>±0.045                | 0.493<br>±0.074                | 0.493<br>±0.043   | 0.484<br>±0.067                | 0.517<br>±0.037   | 0.496<br>±0.054   | 0.496<br>±0.078   | 0.471<br>±0.045   |
|         | BAcc     | 0.279<br>±0.048                | 0.271<br>±0.077                | <b>0.287</b><br>± <b>0.070</b> | 0.271<br>±0.078 | 0.267<br>±0.056 | 0.263<br>±0.046 | 0.237<br>±0.035  | 0.275<br>±0.077  | 0.283<br>±0.024                | 0.300<br>± 0.062 | 0.262<br>±0.048  | 0.258<br>±0.067                | 0.275<br>±0.068                | 0.254<br>±0.048                | 0.258<br>±0.067   | 0.242<br>±0.064                | 0.237<br>±0.046   | 0.262<br>±0.032   | 0.233<br>±0.070   | 0.237<br>±0.019   |
|         | Acc.1    | 0.279<br>±0.048                | 0.271<br>±0.077                | <b>0.287</b><br>± <b>0.070</b> | 0.271<br>±0.078 | 0.267<br>±0.056 | 0.263<br>±0.046 | 0.237<br>±0.035  | 0.275<br>±0.077  | 0.283<br>±0.024                | 0.300<br>± 0.062 | 0.263<br>±0.048  | 0.258<br>±0.067                | 0.275<br>±0.068                | 0.254<br>±0.048                | 0.258<br>±0.067   | 0.242<br>±0.064                | 0.237<br>±0.046   | 0.258<br>±0.032   | 0.212<br>±0.064   | 0.237<br>±0.019   |
|         | Acc.2    | 0.542<br>±0.061                | 0.525<br>±0.027                | 0.542<br>±0.103                | 0.496<br>±0.065 | 0.500<br>±0.033 | 0.475<br>±0.074 | 0.521<br>±0.053  | 0.508<br>±0.035  | 0.571<br>± 0.054               | 0.525<br>±0.052  | 0.475<br>±0.081  | <b>0.550</b><br>± <b>0.050</b> | 0.521<br>±0.101                | 0.467<br>±0.052                | 0.504<br>±0.054   | 0.479<br>±0.042                | 0.521<br>±0.068   | 0.504<br>±0.045   | 0.506<br>±0.060   | 0.517<br>±0.061   |
|         | $\kappa$ | 0.053<br>±0.161                | 0.033<br>±0.115                | 0.087<br>± 0.077               | 0.047<br>±0.077 | 0.047<br>±0.122 | 0.007<br>±0.028 | -0.020<br>±0.093 | -0.020<br>±0.126 | <b>0.073</b><br>± <b>0.095</b> | 0.033<br>±0.062  | 0.033<br>±0.075  | 0.027<br>±0.104                | 0.020<br>±0.061                | 0.053<br>±0.069                | 0.007<br>±0.060   | 0.007<br>±0.072                | 0.007<br>±0.104   | 0.053<br>±0.102   | 0.013<br>±0.107   | -0.020<br>±0.051  |
| sub8    | AUC      | <b>0.561</b><br>± <b>0.063</b> | 0.548<br>±0.059                | 0.591<br>± 0.055               | 0.550<br>±0.057 | 0.535<br>±0.111 | 0.519<br>±0.090 | 0.510<br>±0.063  | 0.483<br>±0.059  | 0.560<br>±0.025                | 0.539<br>±0.058  | 0.511<br>±0.044  | 0.529<br>±0.084                | 0.517<br>±0.033                | 0.519<br>±0.039                | 0.499<br>±0.033   | 0.525<br>±0.082                | 0.537<br>±0.049   | 0.541<br>±0.066   | 0.527<br>±0.055   | 0.489<br>±0.067   |
|         | BAcc     | 0.290<br>±0.121                | 0.275<br>±0.087                | 0.315<br>± 0.058               | 0.285<br>±0.058 | 0.285<br>±0.091 | 0.255<br>±0.021 | 0.235<br>±0.070  | 0.235<br>±0.095  | <b>0.305</b><br>± <b>0.072</b> | 0.275<br>±0.047  | 0.275<br>±0.056  | 0.270<br>±0.078                | 0.265<br>±0.045                | 0.290<br>±0.052                | 0.255<br>±0.045   | 0.255<br>±0.054                | 0.255<br>±0.078   | 0.290<br>±0.076   | 0.260<br>±0.080   | 0.235<br>±0.038   |
|         | Acc.1    | 0.290<br>±0.121                | 0.275<br>±0.087                | 0.315<br>± 0.058               | 0.285<br>±0.058 | 0.285<br>±0.091 | 0.255<br>±0.021 | 0.235<br>±0.070  | 0.235<br>±0.095  | <b>0.305</b><br>± <b>0.072</b> | 0.275<br>±0.047  | 0.275<br>±0.056  | 0.270<br>±0.078                | 0.265<br>±0.045                | 0.290<br>±0.052                | 0.255<br>±0.045   | 0.255<br>±0.054                | 0.255<br>±0.078   | 0.290<br>±0.076   | 0.237<br>±0.068   | 0.235<br>±0.038   |
|         | Acc.2    | <b>0.575</b><br>± <b>0.075</b> | 0.555<br>±0.076                | 0.585<br>± 0.091               | 0.555<br>±0.054 | 0.495<br>±0.129 | 0.540<br>±0.105 | 0.535<br>±0.052  | 0.465<br>±0.080  | 0.565<br>±0.029                | 0.530<br>±0.102  | 0.505<br>±0.062  | 0.525<br>±0.120                | 0.520<br>±0.084                | 0.495<br>±0.054                | 0.510<br>±0.029   | 0.520<br>±0.091                | 0.505<br>±0.072   | 0.510<br>±0.078   | 0.431<br>±0.067   | 0.475<br>±0.077   |
|         | $\kappa$ | 0.067<br>±0.101                | 0.039<br>±0.107                | 0.156<br>± 0.082               | 0.006<br>±0.128 | 0.011<br>±0.042 | 0.022<br>±0.093 | -0.017<br>±0.152 | -0.039<br>±0.058 | 0.006<br>±0.110                | 0.039<br>±0.042  | -0.011<br>±0.101 | -0.056<br>±0.065               | -0.011<br>±0.061               | 0.072<br>±0.085                | 0.028<br>±0.123   | <b>0.078</b><br>± <b>0.053</b> | 0.017<br>±0.109   | 0.033<br>±0.036   | 0.028<br>±0.065   | 0.000<br>±0.044   |
| sub9    | AUC      | 0.534<br>±0.060                | 0.532<br>±0.061                | 0.583<br>± 0.045               | 0.503<br>±0.062 | 0.516<br>±0.021 | 0.511<br>±0.046 | 0.490<br>±0.092  | 0.457<br>±0.062  | 0.517<br>±0.057                | 0.534<br>±0.046  | 0.497<br>±0.065  | 0.481<br>±0.067                | 0.513<br>±0.031                | <b>0.534</b><br>± <b>0.062</b> | 0.519<br>±0.078   | 0.525<br>±0.062                | 0.530<br>±0.047   | 0.527<br>±0.050   | 0.527<br>±0.038   | 0.531<br>±0.071   |

Continued on next page



| Subject | Metric | DeepConvNet | EEGNet | Conformer | CTNet  | BIOT (f) | BIOT (l) | BENDR (f) | BENDR (l) | CBraMod (f) | CBraMod (l) | EEGPT (f) | EEGPT (l) | LaBraM (f) | LaBraM (l) | STEEGformer-s (f) | STEEGformer-s (l) | STEEGformer-b (f) | STEEGformer-b (l) | STEEGformer-l (f) | STEEGformer-l (l) |
|---------|--------|-------------|--------|-----------|--------|----------|----------|-----------|-----------|-------------|-------------|-----------|-----------|------------|------------|-------------------|-------------------|-------------------|-------------------|-------------------|-------------------|
| 4761    |        | 0.300       | 0.279  | 0.367     | 0.254  | 0.258    | 0.267    | 0.237     | 0.221     | 0.254       | 0.279       | 0.242     | 0.208     | 0.242      | 0.304      | 0.271             | 0.308             | 0.263             | 0.275             | 0.271             | 0.250             |
| 4762    | BAcc   | ±0.076      | ±0.080 | ±0.062    | ±0.096 | ±0.032   | ±0.070   | ±0.114    | ±0.043    | ±0.083      | ±0.032      | ±0.076    | ±0.049    | ±0.046     | ±0.064     | ±0.092            | ±0.040            | ±0.081            | ±0.027            | ±0.049            | ±0.033            |
| 4763    |        | 0.300       | 0.279  | 0.367     | 0.254  | 0.258    | 0.267    | 0.237     | 0.221     | 0.254       | 0.279       | 0.242     | 0.208     | 0.242      | 0.304      | 0.271             | 0.304             | 0.263             | 0.275             | 0.266             | 0.250             |
| 4764    | Acc_1  | ±0.076      | ±0.080 | ±0.062    | ±0.096 | ±0.032   | ±0.070   | ±0.114    | ±0.043    | ±0.083      | ±0.032      | ±0.076    | ±0.049    | ±0.046     | ±0.064     | ±0.092            | ±0.041            | ±0.081            | ±0.027            | ±0.044            | ±0.033            |
| 4765    |        | 0.558       | 0.542  | 0.583     | 0.492  | 0.508    | 0.533    | 0.504     | 0.421     | 0.475       | 0.517       | 0.529     | 0.467     | 0.521      | 0.537      | 0.546             | 0.529             | 0.508             | 0.525             | 0.581             | 0.542             |
| 4766    | Acc_2  | ±0.092      | ±0.071 | ±0.059    | ±0.103 | ±0.028   | ±0.064   | ±0.096    | ±0.037    | ±0.054      | ±0.054      | ±0.060    | ±0.032    | ±0.039     | ±0.065     | ±0.063            | ±0.046            | ±0.089            | ±0.086            | ±0.102            | ±0.053            |
| 4767    |        | 0.300       | 0.279  | 0.367     | 0.254  | 0.258    | 0.267    | 0.237     | 0.221     | 0.254       | 0.279       | 0.242     | 0.208     | 0.242      | 0.304      | 0.271             | 0.304             | 0.263             | 0.275             | 0.266             | 0.250             |
| 4768    |        | 0.558       | 0.542  | 0.583     | 0.492  | 0.508    | 0.533    | 0.504     | 0.421     | 0.475       | 0.517       | 0.529     | 0.467     | 0.521      | 0.537      | 0.546             | 0.529             | 0.508             | 0.525             | 0.581             | 0.542             |
| 4769    |        | 0.300       | 0.279  | 0.367     | 0.254  | 0.258    | 0.267    | 0.237     | 0.221     | 0.254       | 0.279       | 0.242     | 0.208     | 0.242      | 0.304      | 0.271             | 0.304             | 0.263             | 0.275             | 0.266             | 0.250             |
| 4770    |        | 0.558       | 0.542  | 0.583     | 0.492  | 0.508    | 0.533    | 0.504     | 0.421     | 0.475       | 0.517       | 0.529     | 0.467     | 0.521      | 0.537      | 0.546             | 0.529             | 0.508             | 0.525             | 0.581             | 0.542             |
| 4771    |        | 0.300       | 0.279  | 0.367     | 0.254  | 0.258    | 0.267    | 0.237     | 0.221     | 0.254       | 0.279       | 0.242     | 0.208     | 0.242      | 0.304      | 0.271             | 0.304             | 0.263             | 0.275             | 0.266             | 0.250             |
| 4772    |        | 0.558       | 0.542  | 0.583     | 0.492  | 0.508    | 0.533    | 0.504     | 0.421     | 0.475       | 0.517       | 0.529     | 0.467     | 0.521      | 0.537      | 0.546             | 0.529             | 0.508             | 0.525             | 0.581             | 0.542             |
| 4773    |        | 0.300       | 0.279  | 0.367     | 0.254  | 0.258    | 0.267    | 0.237     | 0.221     | 0.254       | 0.279       | 0.242     | 0.208     | 0.242      | 0.304      | 0.271             | 0.304             | 0.263             | 0.275             | 0.266             | 0.250             |
| 4774    |        | 0.558       | 0.542  | 0.583     | 0.492  | 0.508    | 0.533    | 0.504     | 0.421     | 0.475       | 0.517       | 0.529     | 0.467     | 0.521      | 0.537      | 0.546             | 0.529             | 0.508             | 0.525             | 0.581             | 0.542             |
| 4775    |        | 0.300       | 0.279  | 0.367     | 0.254  | 0.258    | 0.267    | 0.237     | 0.221     | 0.254       | 0.279       | 0.242     | 0.208     | 0.242      | 0.304      | 0.271             | 0.304             | 0.263             | 0.275             | 0.266             | 0.250             |
| 4776    |        | 0.558       | 0.542  | 0.583     | 0.492  | 0.508    | 0.533    | 0.504     | 0.421     | 0.475       | 0.517       | 0.529     | 0.467     | 0.521      | 0.537      | 0.546             | 0.529             | 0.508             | 0.525             | 0.581             | 0.542             |
| 4777    |        | 0.300       | 0.279  | 0.367     | 0.254  | 0.258    | 0.267    | 0.237     | 0.221     | 0.254       | 0.279       | 0.242     | 0.208     | 0.242      | 0.304      | 0.271             | 0.304             | 0.263             | 0.275             | 0.266             | 0.250             |
| 4778    |        | 0.558       | 0.542  | 0.583     | 0.492  | 0.508    | 0.533    | 0.504     | 0.421     | 0.475       | 0.517       | 0.529     | 0.467     | 0.521      | 0.537      | 0.546             | 0.529             | 0.508             | 0.525             | 0.581             | 0.542             |
| 4779    |        | 0.300       | 0.279  | 0.367     | 0.254  | 0.258    | 0.267    | 0.237     | 0.221     | 0.254       | 0.279       | 0.242     | 0.208     | 0.242      | 0.304      | 0.271             | 0.304             | 0.263             | 0.275             | 0.266             | 0.250             |
| 4780    |        | 0.558       | 0.542  | 0.583     | 0.492  | 0.508    | 0.533    | 0.504     | 0.421     | 0.475       | 0.517       | 0.529     | 0.467     | 0.521      | 0.537      | 0.546             | 0.529             | 0.508             | 0.525             | 0.581             | 0.542             |
| 4781    |        | 0.300       | 0.279  | 0.367     | 0.254  | 0.258    | 0.267    | 0.237     | 0.221     | 0.254       | 0.279       | 0.242     | 0.208     | 0.242      | 0.304      | 0.271             | 0.304             | 0.263             | 0.275             | 0.266             | 0.250             |
| 4782    |        | 0.558       | 0.542  | 0.583     | 0.492  | 0.508    | 0.533    | 0.504     | 0.421     | 0.475       | 0.517       | 0.529     | 0.467     | 0.521      | 0.537      | 0.546             | 0.529             | 0.508             | 0.525             | 0.581             | 0.542             |
| 4783    |        | 0.300       | 0.279  | 0.367     | 0.254  | 0.258    | 0.267    | 0.237     | 0.221     | 0.254       | 0.279       | 0.242     | 0.208     | 0.242      | 0.304      | 0.271             | 0.304             | 0.263             | 0.275             | 0.266             | 0.250             |
| 4784    |        | 0.558       | 0.542  | 0.583     | 0.492  | 0.508    | 0.533    | 0.504     | 0.421     | 0.475       | 0.517       | 0.529     | 0.467     | 0.521      | 0.537      | 0.546             | 0.529             | 0.508             | 0.525             | 0.581             | 0.542             |
| 4785    |        | 0.300       | 0.279  | 0.367     | 0.254  | 0.258    | 0.267    | 0.237     | 0.221     | 0.254       | 0.279       | 0.242     | 0.208     | 0.242      | 0.304      | 0.271             | 0.304             | 0.263             | 0.275             | 0.266             | 0.250             |
| 4786    |        | 0.558       | 0.542  | 0.583     | 0.492  | 0.508    | 0.533    | 0.504     | 0.421     | 0.475       | 0.517       | 0.529     | 0.467     | 0.521      | 0.537      | 0.546             | 0.529             | 0.508             | 0.525             | 0.581             | 0.542             |
| 4787    |        | 0.300       | 0.279  | 0.367     | 0.254  | 0.258    | 0.267    | 0.237     | 0.221     | 0.254       | 0.279       | 0.242     | 0.208     | 0.242      | 0.304      | 0.271             | 0.304             | 0.263             | 0.275             | 0.266             | 0.250             |
| 4788    |        | 0.558       | 0.542  | 0.583     | 0.492  | 0.508    | 0.533    | 0.504     | 0.421     | 0.475       | 0.517       | 0.529     | 0.467     | 0.521      | 0.537      | 0.546             | 0.529             | 0.508             | 0.525             | 0.581             | 0.542             |
| 4789    |        | 0.300       | 0.279  | 0.367     | 0.254  | 0.258    | 0.267    | 0.237     | 0.221     | 0.254       | 0.279       | 0.242     | 0.208     | 0.242      | 0.304      | 0.271             | 0.304             | 0.263             | 0.275             | 0.266             | 0.250             |
| 4790    |        | 0.558       | 0.542  | 0.583     | 0.492  | 0.508    | 0.533    | 0.504     | 0.421     | 0.475       | 0.517       | 0.529     | 0.467     | 0.521      | 0.537      | 0.546             | 0.529             | 0.508             | 0.525             | 0.581             | 0.542             |
| 4791    |        | 0.300       | 0.279  | 0.367     | 0.254  | 0.258    | 0.267    | 0.237     | 0.221     | 0.254       | 0.279       | 0.242     | 0.208     | 0.242      | 0.304      | 0.271             | 0.304             | 0.263             | 0.275             | 0.266             | 0.250             |
| 4792    |        | 0.558       | 0.542  | 0.583     | 0.492  | 0.508    | 0.533    | 0.504     | 0.421     | 0.475       | 0.517       | 0.529     | 0.467     | 0.521      | 0.537      | 0.546             | 0.529             | 0.508             | 0.525             | 0.581             | 0.542             |
| 4793    |        | 0.300       | 0.279  | 0.367     | 0.254  | 0.258    | 0.267    | 0.237     | 0.221     | 0.254       | 0.279       | 0.242     | 0.208     | 0.242      | 0.304      | 0.271             | 0.304             | 0.263             | 0.275             | 0.266             | 0.250             |

4761  
4762  
4763  
4764  
4765  
4766  
4767  
4768  
4769  
4770  
4771  
4772  
4773  
4774  
4775  
4776  
4777  
4778  
4779  
4780  
4781  
4782  
4783  
4784  
4785  
4786  
4787  
4788  
4789  
4790  
4791  
4792  
4793

## E.3.2 LEAVE-ONE-OUT FINE-TUNING RESULTS

Table 47: Average Leave-One-Out Fine-Tuned Performance Across All Subjects.

| Model (Training strategy) | $\kappa$     | AUC          | BAcc         | Acc.1        | Acc.2        |
|---------------------------|--------------|--------------|--------------|--------------|--------------|
|                           | 0.059        | 0.558        | 0.294        | 0.294        | 0.560        |
| <b>DeepConvnet</b>        | $\pm 0.046$  | $\pm 0.038$  | $\pm 0.035$  | $\pm 0.035$  | $\pm 0.042$  |
|                           | 0.068        | 0.558        | 0.301        | 0.301        | 0.558        |
| <b>EEGNet</b>             | $\pm 0.043$  | $\pm 0.040$  | $\pm 0.033$  | $\pm 0.032$  | $\pm 0.049$  |
|                           | 0.058        | 0.550        | 0.294        | 0.294        | 0.543        |
| <b>Conformer</b>          | $\pm 0.043$  | $\pm 0.025$  | $\pm 0.033$  | $\pm 0.032$  | $\pm 0.036$  |
|                           | <b>0.085</b> | 0.574        | <b>0.314</b> | <b>0.313</b> | <b>0.570</b> |
| <b>CTNet</b>              | $\pm 0.071$  | $\pm 0.061$  | $\pm 0.053$  | $\pm 0.053$  | $\pm 0.064$  |
|                           | 0.011        | 0.509        | 0.259        | 0.259        | 0.515        |
| <b>BIOT (f)</b>           | $\pm 0.052$  | $\pm 0.030$  | $\pm 0.039$  | $\pm 0.039$  | $\pm 0.031$  |
|                           | 0.015        | 0.513        | 0.262        | 0.262        | 0.506        |
| <b>BIOT (l)</b>           | $\pm 0.044$  | $\pm 0.022$  | $\pm 0.033$  | $\pm 0.033$  | $\pm 0.030$  |
|                           | 0.047        | 0.536        | 0.285        | 0.285        | 0.539        |
| <b>BENDR (f)</b>          | $\pm 0.042$  | $\pm 0.021$  | $\pm 0.031$  | $\pm 0.031$  | $\pm 0.045$  |
|                           | 0.011        | 0.497        | 0.258        | 0.258        | 0.491        |
| <b>BENDR (l)</b>          | $\pm 0.032$  | $\pm 0.025$  | $\pm 0.024$  | $\pm 0.024$  | $\pm 0.030$  |
|                           | 0.093        | <b>0.570</b> | 0.320        | 0.320        | 0.577        |
| <b>CBraMod (f)</b>        | $\pm 0.073$  | $\pm 0.047$  | $\pm 0.055$  | $\pm 0.055$  | $\pm 0.053$  |
|                           | 0.021        | 0.527        | 0.266        | 0.265        | 0.526        |
| <b>CBraMod (l)</b>        | $\pm 0.035$  | $\pm 0.042$  | $\pm 0.026$  | $\pm 0.027$  | $\pm 0.027$  |
|                           | 0.007        | 0.512        | 0.255        | 0.255        | 0.526        |
| <b>EEGPT (f)</b>          | $\pm 0.042$  | $\pm 0.025$  | $\pm 0.031$  | $\pm 0.031$  | $\pm 0.027$  |
|                           | 0.032        | 0.533        | 0.274        | 0.274        | 0.544        |
| <b>EEGPT (l)</b>          | $\pm 0.039$  | $\pm 0.028$  | $\pm 0.029$  | $\pm 0.029$  | $\pm 0.028$  |
|                           | 0.005        | 0.502        | 0.254        | 0.254        | 0.495        |
| <b>LaBraM (f)</b>         | $\pm 0.038$  | $\pm 0.018$  | $\pm 0.028$  | $\pm 0.028$  | $\pm 0.034$  |
|                           | -0.007       | 0.498        | 0.244        | 0.244        | 0.497        |
| <b>LaBraM (l)</b>         | $\pm 0.038$  | $\pm 0.023$  | $\pm 0.028$  | $\pm 0.028$  | $\pm 0.031$  |
|                           | 0.003        | 0.505        | 0.252        | 0.252        | 0.493        |
| <b>STEEGformer-s (f)</b>  | $\pm 0.044$  | $\pm 0.029$  | $\pm 0.033$  | $\pm 0.033$  | $\pm 0.045$  |
|                           | -0.023       | 0.475        | 0.233        | 0.233        | 0.486        |
| <b>STEEGformer-s (l)</b>  | $\pm 0.034$  | $\pm 0.025$  | $\pm 0.026$  | $\pm 0.026$  | $\pm 0.034$  |
|                           | 0.002        | 0.504        | 0.252        | 0.252        | 0.497        |
| <b>STEEGformer-b (f)</b>  | $\pm 0.041$  | $\pm 0.029$  | $\pm 0.030$  | $\pm 0.031$  | $\pm 0.032$  |
|                           | -0.010       | 0.491        | 0.243        | 0.242        | 0.491        |
| <b>STEEGformer-b (l)</b>  | $\pm 0.030$  | $\pm 0.019$  | $\pm 0.023$  | $\pm 0.023$  | $\pm 0.037$  |
|                           | 0.029        | 0.521        | 0.272        | 0.271        | 0.516        |
| <b>STEEGformer-l (f)</b>  | $\pm 0.041$  | $\pm 0.032$  | $\pm 0.030$  | $\pm 0.028$  | $\pm 0.057$  |
|                           | -0.008       | 0.483        | 0.244        | 0.244        | 0.487        |
| <b>STEEGformer-l (l)</b>  | $\pm 0.039$  | $\pm 0.044$  | $\pm 0.030$  | $\pm 0.029$  | $\pm 0.032$  |

Table 48: Per-Subject Leave-One-Out Fine-Tuned Performance.

| Subject | Metric   | DeepConvnet                 | EEGNet                      | Conformer             | CTNet                       | BIOT (f)                    | BIOT (l)             | BENDR (f)                   | BENDR (l)             | CBraMod (f)                 | CBraMod (l)           | EEGPT (f)             | EEGPT (l)             | LaBraM (f)            | LaBraM (l)            | STEEGformer-s (f)     | STEEGformer-s (l)     | STEEGformer-b (f)     | STEEGformer-b (l)     | STEEGformer-l (f)           | STEEGformer-l (l)     |
|---------|----------|-----------------------------|-----------------------------|-----------------------|-----------------------------|-----------------------------|----------------------|-----------------------------|-----------------------|-----------------------------|-----------------------|-----------------------|-----------------------|-----------------------|-----------------------|-----------------------|-----------------------|-----------------------|-----------------------|-----------------------------|-----------------------|
| sub1    | $\kappa$ | <b>0.100</b><br>$\pm 0.041$ | 0.060<br>$\pm 0.101$        | -0.013<br>$\pm 0.051$ | 0.040<br>$\pm 0.119$        | <b>0.120</b><br>$\pm 0.065$ | 0.000<br>$\pm 0.105$ | 0.080<br>$\pm 0.145$        | 0.067<br>$\pm 0.082$  | 0.033<br>$\pm 0.085$        | 0.027<br>$\pm 0.095$  | 0.000<br>$\pm 0.103$  | 0.020<br>$\pm 0.102$  | 0.053<br>$\pm 0.112$  | -0.000<br>$\pm 0.024$ | -0.047<br>$\pm 0.102$ | 0.000<br>$\pm 0.085$  | 0.033<br>$\pm 0.133$  | -0.020<br>$\pm 0.090$ | 0.013<br>$\pm 0.090$        | 0.013<br>$\pm 0.080$  |
|         | AUC      | <b>0.584</b><br>$\pm 0.028$ | 0.569<br>$\pm 0.078$        | 0.528<br>$\pm 0.054$  | 0.513<br>$\pm 0.075$        | <b>0.578</b><br>$\pm 0.024$ | 0.514<br>$\pm 0.077$ | 0.551<br>$\pm 0.064$        | 0.542<br>$\pm 0.053$  | 0.511<br>$\pm 0.042$        | 0.513<br>$\pm 0.075$  | 0.481<br>$\pm 0.044$  | 0.527<br>$\pm 0.058$  | 0.509<br>$\pm 0.052$  | 0.504<br>$\pm 0.048$  | 0.482<br>$\pm 0.053$  | 0.468<br>$\pm 0.091$  | 0.491<br>$\pm 0.072$  | 0.490<br>$\pm 0.063$  | 0.483<br>$\pm 0.057$        | 0.481<br>$\pm 0.062$  |
|         | BAcc     | <b>0.325</b><br>$\pm 0.031$ | 0.295<br>$\pm 0.076$        | 0.240<br>$\pm 0.038$  | 0.280<br>$\pm 0.089$        | <b>0.340</b><br>$\pm 0.049$ | 0.250<br>$\pm 0.079$ | 0.310<br>$\pm 0.108$        | 0.300<br>$\pm 0.061$  | 0.275<br>$\pm 0.064$        | 0.270<br>$\pm 0.072$  | 0.250<br>$\pm 0.077$  | 0.265<br>$\pm 0.076$  | 0.290<br>$\pm 0.084$  | 0.250<br>$\pm 0.018$  | 0.215<br>$\pm 0.076$  | 0.250<br>$\pm 0.064$  | 0.275<br>$\pm 0.100$  | 0.235<br>$\pm 0.068$  | 0.260<br>$\pm 0.068$        | 0.260<br>$\pm 0.060$  |
|         | Acc.1    | <b>0.325</b><br>$\pm 0.031$ | 0.295<br>$\pm 0.076$        | 0.240<br>$\pm 0.038$  | 0.280<br>$\pm 0.089$        | <b>0.340</b><br>$\pm 0.049$ | 0.250<br>$\pm 0.079$ | 0.310<br>$\pm 0.108$        | 0.300<br>$\pm 0.061$  | 0.275<br>$\pm 0.064$        | 0.270<br>$\pm 0.072$  | 0.250<br>$\pm 0.077$  | 0.265<br>$\pm 0.076$  | 0.290<br>$\pm 0.084$  | 0.250<br>$\pm 0.018$  | 0.215<br>$\pm 0.076$  | 0.250<br>$\pm 0.064$  | 0.275<br>$\pm 0.100$  | 0.235<br>$\pm 0.068$  | 0.256<br>$\pm 0.106$        | 0.260<br>$\pm 0.060$  |
|         | Acc.2    | 0.545<br>$\pm 0.089$        | <b>0.600</b><br>$\pm 0.092$ | 0.540<br>$\pm 0.034$  | 0.495<br>$\pm 0.084$        | <b>0.575</b><br>$\pm 0.064$ | 0.520<br>$\pm 0.074$ | 0.570<br>$\pm 0.112$        | 0.545<br>$\pm 0.089$  | 0.530<br>$\pm 0.060$        | 0.550<br>$\pm 0.064$  | 0.495<br>$\pm 0.091$  | 0.530<br>$\pm 0.087$  | 0.535<br>$\pm 0.088$  | 0.490<br>$\pm 0.052$  | 0.500<br>$\pm 0.068$  | 0.485<br>$\pm 0.108$  | 0.485<br>$\pm 0.068$  | 0.450<br>$\pm 0.071$  | 0.447<br>$\pm 0.114$        | 0.480<br>$\pm 0.033$  |
| sub10   | $\kappa$ | 0.000<br>$\pm 0.150$        | 0.033<br>$\pm 0.108$        | 0.039<br>$\pm 0.058$  | <b>0.111</b><br>$\pm 0.102$ | -0.028<br>$\pm 0.039$       | 0.033<br>$\pm 0.087$ | 0.039<br>$\pm 0.131$        | -0.022<br>$\pm 0.060$ | <b>0.128</b><br>$\pm 0.058$ | 0.017<br>$\pm 0.050$  | -0.017<br>$\pm 0.025$ | 0.006<br>$\pm 0.082$  | 0.006<br>$\pm 0.063$  | -0.067<br>$\pm 0.050$ | 0.050<br>$\pm 0.046$  | -0.039<br>$\pm 0.054$ | 0.033<br>$\pm 0.095$  | -0.072<br>$\pm 0.101$ | 0.072<br>$\pm 0.085$        | -0.028<br>$\pm 0.039$ |
|         | AUC      | 0.540<br>$\pm 0.051$        | 0.534<br>$\pm 0.056$        | 0.556<br>$\pm 0.068$  | <b>0.563</b><br>$\pm 0.069$ | 0.476<br>$\pm 0.059$        | 0.520<br>$\pm 0.050$ | 0.499<br>$\pm 0.068$        | 0.493<br>$\pm 0.014$  | <b>0.591</b><br>$\pm 0.049$ | 0.550<br>$\pm 0.031$  | 0.505<br>$\pm 0.047$  | 0.523<br>$\pm 0.051$  | 0.499<br>$\pm 0.031$  | 0.469<br>$\pm 0.044$  | 0.538<br>$\pm 0.059$  | 0.433<br>$\pm 0.031$  | 0.512<br>$\pm 0.048$  | 0.451<br>$\pm 0.028$  | 0.557<br>$\pm 0.070$        | 0.456<br>$\pm 0.054$  |
|         | BAcc     | 0.250<br>$\pm 0.112$        | 0.275<br>$\pm 0.081$        | 0.279<br>$\pm 0.043$  | <b>0.333</b><br>$\pm 0.077$ | 0.229<br>$\pm 0.029$        | 0.275<br>$\pm 0.065$ | 0.279<br>$\pm 0.098$        | 0.233<br>$\pm 0.045$  | <b>0.346</b><br>$\pm 0.043$ | 0.263<br>$\pm 0.038$  | 0.237<br>$\pm 0.019$  | 0.254<br>$\pm 0.061$  | 0.254<br>$\pm 0.048$  | 0.200<br>$\pm 0.038$  | 0.287<br>$\pm 0.034$  | 0.221<br>$\pm 0.041$  | 0.275<br>$\pm 0.071$  | 0.196<br>$\pm 0.076$  | 0.304<br>$\pm 0.064$        | 0.229<br>$\pm 0.029$  |
|         | Acc.1    | 0.250<br>$\pm 0.112$        | 0.275<br>$\pm 0.081$        | 0.279<br>$\pm 0.043$  | <b>0.333</b><br>$\pm 0.077$ | 0.229<br>$\pm 0.029$        | 0.275<br>$\pm 0.065$ | 0.279<br>$\pm 0.098$        | 0.233<br>$\pm 0.045$  | <b>0.346</b><br>$\pm 0.043$ | 0.258<br>$\pm 0.043$  | 0.237<br>$\pm 0.019$  | 0.254<br>$\pm 0.061$  | 0.254<br>$\pm 0.048$  | 0.200<br>$\pm 0.038$  | 0.287<br>$\pm 0.034$  | 0.221<br>$\pm 0.041$  | 0.275<br>$\pm 0.071$  | 0.196<br>$\pm 0.076$  | 0.316<br>$\pm 0.068$        | 0.233<br>$\pm 0.034$  |
|         | Acc.2    | 0.546<br>$\pm 0.043$        | 0.529<br>$\pm 0.067$        | 0.517<br>$\pm 0.099$  | 0.554<br>$\pm 0.098$        | 0.479<br>$\pm 0.057$        | 0.492<br>$\pm 0.070$ | 0.463<br>$\pm 0.070$        | 0.483<br>$\pm 0.034$  | <b>0.604</b><br>$\pm 0.090$ | 0.550<br>$\pm 0.080$  | 0.533<br>$\pm 0.087$  | 0.504<br>$\pm 0.097$  | 0.454<br>$\pm 0.068$  | 0.442<br>$\pm 0.086$  | 0.496<br>$\pm 0.065$  | 0.458<br>$\pm 0.053$  | 0.512<br>$\pm 0.060$  | 0.408<br>$\pm 0.062$  | <b>0.600</b><br>$\pm 0.062$ | 0.475<br>$\pm 0.097$  |
| sub2    | $\kappa$ | 0.078<br>$\pm 0.077$        | <b>0.122</b><br>$\pm 0.124$ | 0.078<br>$\pm 0.082$  | 0.039<br>$\pm 0.050$        | -0.039<br>$\pm 0.042$       | 0.039<br>$\pm 0.064$ | <b>0.094</b><br>$\pm 0.075$ | -0.011<br>$\pm 0.061$ | 0.089<br>$\pm 0.036$        | -0.022<br>$\pm 0.132$ | 0.000<br>$\pm 0.076$  | -0.006<br>$\pm 0.050$ | -0.006<br>$\pm 0.134$ | -0.006<br>$\pm 0.099$ | 0.033<br>$\pm 0.103$  | -0.028<br>$\pm 0.083$ | -0.017<br>$\pm 0.058$ | 0.017<br>$\pm 0.058$  | 0.017<br>$\pm 0.087$        | -0.011<br>$\pm 0.064$ |
|         | AUC      | <b>0.579</b><br>$\pm 0.028$ | <b>0.592</b><br>$\pm 0.064$ | 0.565<br>$\pm 0.058$  | 0.539<br>$\pm 0.044$        | 0.510<br>$\pm 0.025$        | 0.523<br>$\pm 0.033$ | 0.542<br>$\pm 0.041$        | 0.473<br>$\pm 0.040$  | 0.555<br>$\pm 0.038$        | 0.498<br>$\pm 0.057$  | 0.502<br>$\pm 0.036$  | 0.516<br>$\pm 0.031$  | 0.511<br>$\pm 0.049$  | 0.496<br>$\pm 0.085$  | 0.529<br>$\pm 0.040$  | 0.483<br>$\pm 0.053$  | 0.478<br>$\pm 0.029$  | 0.485<br>$\pm 0.048$  | 0.523<br>$\pm 0.032$        | 0.499<br>$\pm 0.082$  |
|         | BAcc     | 0.308<br>$\pm 0.058$        | <b>0.342</b><br>$\pm 0.093$ | 0.308<br>$\pm 0.061$  | 0.279<br>$\pm 0.038$        | 0.221<br>$\pm 0.032$        | 0.279<br>$\pm 0.048$ | <b>0.321</b><br>$\pm 0.056$ | 0.242<br>$\pm 0.046$  | 0.317<br>$\pm 0.027$        | 0.233<br>$\pm 0.099$  | 0.250<br>$\pm 0.057$  | 0.246<br>$\pm 0.037$  | 0.246<br>$\pm 0.100$  | 0.246<br>$\pm 0.074$  | 0.275<br>$\pm 0.077$  | 0.229<br>$\pm 0.063$  | 0.237<br>$\pm 0.043$  | 0.262<br>$\pm 0.043$  | 0.263<br>$\pm 0.065$        | 0.242<br>$\pm 0.048$  |
|         | Acc.1    | 0.308<br>$\pm 0.058$        | <b>0.342</b><br>$\pm 0.093$ | 0.308<br>$\pm 0.061$  | 0.279<br>$\pm 0.038$        | 0.221<br>$\pm 0.032$        | 0.279<br>$\pm 0.048$ | <b>0.321</b><br>$\pm 0.056$ | 0.242<br>$\pm 0.046$  | 0.317<br>$\pm 0.027$        | 0.229<br>$\pm 0.094$  | 0.250<br>$\pm 0.057$  | 0.246<br>$\pm 0.037$  | 0.246<br>$\pm 0.100$  | 0.246<br>$\pm 0.074$  | 0.275<br>$\pm 0.077$  | 0.229<br>$\pm 0.063$  | 0.237<br>$\pm 0.043$  | 0.263<br>$\pm 0.043$  | 0.275<br>$\pm 0.093$        | 0.242<br>$\pm 0.048$  |
|         | Acc.2    | <b>0.621</b><br>$\pm 0.071$ | <b>0.588</b><br>$\pm 0.070$ | 0.525<br>$\pm 0.073$  | 0.542<br>$\pm 0.051$        | 0.525<br>$\pm 0.034$        | 0.546<br>$\pm 0.063$ | 0.537<br>$\pm 0.063$        | 0.450<br>$\pm 0.081$  | 0.558<br>$\pm 0.040$        | 0.517<br>$\pm 0.112$  | 0.500<br>$\pm 0.026$  | 0.558<br>$\pm 0.058$  | 0.500<br>$\pm 0.086$  | 0.508<br>$\pm 0.060$  | 0.542<br>$\pm 0.036$  | 0.487<br>$\pm 0.096$  | 0.471<br>$\pm 0.043$  | 0.500<br>$\pm 0.093$  | 0.559<br>$\pm 0.043$        | 0.475<br>$\pm 0.060$  |

Continued on next page

| SubjectMetric |          | DeepConvnet                 | EEGNet               | Conformer                   | CTNet                       | BIOT <sup>(f)</sup>         | BIOT <sup>(f)</sup>         | BENDR <sup>(f)</sup>  | BENDR <sup>(f)</sup> | CBraMod <sup>(f)</sup>      | CBraMod <sup>(f)</sup>      | EEGPT <sup>(f)</sup>  | EEGPT <sup>(f)</sup>  | LaBraM <sup>(f)</sup> | LaBraM <sup>(f)</sup> | STEEGformer-s <sup>(f)</sup> | STEEGformer-s <sup>(f)</sup> | STEEGformer-b <sup>(f)</sup> | STEEGformer-b <sup>(f)</sup> | STEEGformer-h <sup>(f)</sup> | STEEGformer-h <sup>(f)</sup> |
|---------------|----------|-----------------------------|----------------------|-----------------------------|-----------------------------|-----------------------------|-----------------------------|-----------------------|----------------------|-----------------------------|-----------------------------|-----------------------|-----------------------|-----------------------|-----------------------|------------------------------|------------------------------|------------------------------|------------------------------|------------------------------|------------------------------|
| sub3          | $\kappa$ | 0.030<br>$\pm 0.066$        | 0.052<br>$\pm 0.081$ | <b>0.067</b><br>$\pm 0.144$ | -0.044<br>$\pm 0.048$       | -0.052<br>$\pm 0.050$       | 0.067<br>$\pm 0.071$        | 0.015<br>$\pm 0.042$  | 0.022<br>$\pm 0.042$ | 0.089<br>$\pm 0.122$        | 0.059<br>$\pm 0.077$        | -0.074<br>$\pm 0.094$ | -0.037<br>$\pm 0.094$ | 0.015<br>$\pm 0.067$  | -0.000<br>$\pm 0.105$ | -0.089<br>$\pm 0.067$        | -0.052<br>$\pm 0.056$        | 0.044<br>$\pm 0.127$         | -0.037<br>$\pm 0.083$        | -0.059<br>$\pm 0.050$        | 0.000<br>$\pm 0.074$         |
|               | AUC      | 0.516<br>$\pm 0.039$        | 0.521<br>$\pm 0.031$ | 0.527<br>$\pm 0.092$        | 0.504<br>$\pm 0.034$        | 0.479<br>$\pm 0.064$        | 0.528<br>$\pm 0.040$        | 0.530<br>$\pm 0.043$  | 0.476<br>$\pm 0.068$ | 0.557<br>$\pm 0.052$        | <b>0.541</b><br>$\pm 0.098$ | 0.492<br>$\pm 0.047$  | 0.464<br>$\pm 0.041$  | 0.520<br>$\pm 0.057$  | 0.503<br>$\pm 0.021$  | 0.445<br>$\pm 0.053$         | 0.497<br>$\pm 0.048$         | 0.505<br>$\pm 0.074$         | 0.490<br>$\pm 0.074$         | 0.458<br>$\pm 0.043$         | 0.478<br>$\pm 0.045$         |
|               | BAcc     | 0.272<br>$\pm 0.050$        | 0.289<br>$\pm 0.061$ | <b>0.300</b><br>$\pm 0.108$ | 0.217<br>$\pm 0.036$        | 0.211<br>$\pm 0.037$        | <b>0.300</b><br>$\pm 0.053$ | 0.261<br>$\pm 0.032$  | 0.267<br>$\pm 0.032$ | 0.317<br>$\pm 0.091$        | 0.294<br>$\pm 0.058$        | 0.194<br>$\pm 0.071$  | 0.222<br>$\pm 0.071$  | 0.261<br>$\pm 0.050$  | 0.250<br>$\pm 0.079$  | 0.183<br>$\pm 0.050$         | 0.211<br>$\pm 0.042$         | 0.283<br>$\pm 0.095$         | 0.222<br>$\pm 0.062$         | 0.206<br>$\pm 0.037$         | 0.250<br>$\pm 0.056$         |
|               | Acc_1    | 0.272<br>$\pm 0.050$        | 0.289<br>$\pm 0.061$ | <b>0.300</b><br>$\pm 0.108$ | 0.217<br>$\pm 0.036$        | 0.211<br>$\pm 0.037$        | <b>0.300</b><br>$\pm 0.053$ | 0.261<br>$\pm 0.032$  | 0.267<br>$\pm 0.032$ | 0.317<br>$\pm 0.091$        | 0.294<br>$\pm 0.058$        | 0.194<br>$\pm 0.071$  | 0.222<br>$\pm 0.071$  | 0.261<br>$\pm 0.050$  | 0.250<br>$\pm 0.079$  | 0.183<br>$\pm 0.050$         | 0.211<br>$\pm 0.042$         | 0.283<br>$\pm 0.095$         | 0.217<br>$\pm 0.066$         | 0.225<br>$\pm 0.129$         | 0.244<br>$\pm 0.060$         |
|               | Acc_2    | <b>0.561</b><br>$\pm 0.046$ | 0.500<br>$\pm 0.081$ | 0.472<br>$\pm 0.076$        | 0.478<br>$\pm 0.066$        | 0.522<br>$\pm 0.080$        | 0.506<br>$\pm 0.030$        | 0.522<br>$\pm 0.023$  | 0.478<br>$\pm 0.120$ | 0.589<br>$\pm 0.066$        | 0.522<br>$\pm 0.129$        | 0.517<br>$\pm 0.058$  | 0.494<br>$\pm 0.046$  | 0.500<br>$\pm 0.065$  | 0.511<br>$\pm 0.058$  | 0.394<br>$\pm 0.080$         | 0.517<br>$\pm 0.080$         | 0.494<br>$\pm 0.072$         | 0.517<br>$\pm 0.058$         | 0.397<br>$\pm 0.185$         | 0.500<br>$\pm 0.076$         |
| sub4          | $\kappa$ | 0.072<br>$\pm 0.064$        | 0.094<br>$\pm 0.070$ | 0.106<br>$\pm 0.080$        | <b>0.172</b><br>$\pm 0.077$ | 0.011<br>$\pm 0.110$        | -0.072<br>$\pm 0.138$       | 0.028<br>$\pm 0.076$  | 0.044<br>$\pm 0.109$ | 0.222<br>$\pm 0.062$        | 0.011<br>$\pm 0.042$        | 0.061<br>$\pm 0.138$  | 0.106<br>$\pm 0.087$  | 0.039<br>$\pm 0.080$  | 0.056<br>$\pm 0.088$  | 0.022<br>$\pm 0.103$         | -0.011<br>$\pm 0.110$        | 0.033<br>$\pm 0.075$         | 0.006<br>$\pm 0.072$         | 0.044<br>$\pm 0.089$         | -0.006<br>$\pm 0.077$        |
|               | AUC      | 0.567<br>$\pm 0.030$        | 0.561<br>$\pm 0.051$ | 0.584<br>$\pm 0.064$        | 0.653<br>$\pm 0.052$        | 0.509<br>$\pm 0.052$        | 0.458<br>$\pm 0.078$        | 0.520<br>$\pm 0.043$  | 0.535<br>$\pm 0.070$ | <b>0.639</b><br>$\pm 0.006$ | 0.538<br>$\pm 0.031$        | 0.552<br>$\pm 0.085$  | 0.571<br>$\pm 0.059$  | 0.510<br>$\pm 0.048$  | 0.515<br>$\pm 0.046$  | 0.491<br>$\pm 0.071$         | 0.474<br>$\pm 0.046$         | 0.527<br>$\pm 0.048$         | 0.508<br>$\pm 0.025$         | 0.516<br>$\pm 0.076$         | 0.480<br>$\pm 0.080$         |
|               | BAcc     | 0.304<br>$\pm 0.048$        | 0.321<br>$\pm 0.052$ | 0.329<br>$\pm 0.060$        | <b>0.379</b><br>$\pm 0.058$ | 0.258<br>$\pm 0.083$        | 0.196<br>$\pm 0.104$        | 0.271<br>$\pm 0.057$  | 0.283<br>$\pm 0.081$ | 0.417<br>$\pm 0.047$        | 0.258<br>$\pm 0.032$        | 0.296<br>$\pm 0.104$  | 0.329<br>$\pm 0.065$  | 0.279<br>$\pm 0.060$  | 0.292<br>$\pm 0.066$  | 0.267<br>$\pm 0.077$         | 0.242<br>$\pm 0.083$         | 0.275<br>$\pm 0.056$         | 0.242<br>$\pm 0.054$         | 0.283<br>$\pm 0.067$         | 0.246<br>$\pm 0.058$         |
|               | Acc_1    | 0.304<br>$\pm 0.048$        | 0.321<br>$\pm 0.052$ | 0.329<br>$\pm 0.060$        | <b>0.379</b><br>$\pm 0.058$ | 0.258<br>$\pm 0.083$        | 0.196<br>$\pm 0.104$        | 0.271<br>$\pm 0.057$  | 0.283<br>$\pm 0.081$ | 0.417<br>$\pm 0.047$        | 0.258<br>$\pm 0.032$        | 0.296<br>$\pm 0.104$  | 0.329<br>$\pm 0.065$  | 0.279<br>$\pm 0.060$  | 0.292<br>$\pm 0.066$  | 0.267<br>$\pm 0.077$         | 0.242<br>$\pm 0.083$         | 0.275<br>$\pm 0.056$         | 0.242<br>$\pm 0.054$         | 0.272<br>$\pm 0.079$         | 0.250<br>$\pm 0.062$         |
|               | Acc_2    | 0.579<br>$\pm 0.031$        | 0.613<br>$\pm 0.076$ | 0.592<br>$\pm 0.079$        | 0.629<br>$\pm 0.070$        | 0.500<br>$\pm 0.044$        | 0.433<br>$\pm 0.088$        | 0.479<br>$\pm 0.021$  | 0.492<br>$\pm 0.072$ | <b>0.621</b><br>$\pm 0.050$ | 0.517<br>$\pm 0.052$        | 0.575<br>$\pm 0.076$  | 0.575<br>$\pm 0.075$  | 0.512<br>$\pm 0.056$  | 0.525<br>$\pm 0.086$  | 0.475<br>$\pm 0.094$         | 0.496<br>$\pm 0.050$         | 0.525<br>$\pm 0.054$         | 0.500<br>$\pm 0.077$         | 0.534<br>$\pm 0.107$         | 0.496<br>$\pm 0.068$         |
| sub5          | $\kappa$ | 0.050<br>$\pm 0.041$        | 0.028<br>$\pm 0.065$ | <b>0.072</b><br>$\pm 0.105$ | 0.089<br>$\pm 0.077$        | 0.000<br>$\pm 0.059$        | -0.033<br>$\pm 0.063$       | 0.006<br>$\pm 0.066$  | 0.050<br>$\pm 0.108$ | -0.017<br>$\pm 0.058$       | -0.056<br>$\pm 0.081$       | 0.033<br>$\pm 0.053$  | 0.044<br>$\pm 0.064$  | -0.017<br>$\pm 0.061$ | 0.028<br>$\pm 0.028$  | 0.044<br>$\pm 0.050$         | 0.011<br>$\pm 0.061$         | -0.078<br>$\pm 0.046$        | -0.017<br>$\pm 0.091$        | 0.067<br>$\pm 0.064$         | -0.028<br>$\pm 0.028$        |
|               | AUC      | 0.518<br>$\pm 0.051$        | 0.531<br>$\pm 0.051$ | 0.551<br>$\pm 0.040$        | 0.595<br>$\pm 0.052$        | 0.498<br>$\pm 0.057$        | 0.498<br>$\pm 0.038$        | 0.527<br>$\pm 0.079$  | 0.519<br>$\pm 0.046$ | 0.501<br>$\pm 0.037$        | 0.462<br>$\pm 0.035$        | 0.520<br>$\pm 0.062$  | 0.544<br>$\pm 0.029$  | 0.485<br>$\pm 0.035$  | 0.510<br>$\pm 0.030$  | 0.531<br>$\pm 0.048$         | 0.485<br>$\pm 0.037$         | 0.459<br>$\pm 0.032$         | 0.492<br>$\pm 0.026$         | <b>0.561</b><br>$\pm 0.029$  | 0.469<br>$\pm 0.038$         |
|               | BAcc     | 0.287<br>$\pm 0.031$        | 0.271<br>$\pm 0.049$ | <b>0.304</b><br>$\pm 0.079$ | 0.317<br>$\pm 0.058$        | 0.250<br>$\pm 0.044$        | 0.225<br>$\pm 0.048$        | 0.254<br>$\pm 0.050$  | 0.287<br>$\pm 0.081$ | 0.237<br>$\pm 0.043$        | 0.208<br>$\pm 0.061$        | 0.275<br>$\pm 0.040$  | 0.283<br>$\pm 0.048$  | 0.237<br>$\pm 0.046$  | 0.271<br>$\pm 0.021$  | 0.283<br>$\pm 0.038$         | 0.258<br>$\pm 0.046$         | 0.192<br>$\pm 0.034$         | 0.237<br>$\pm 0.068$         | 0.300<br>$\pm 0.048$         | 0.229<br>$\pm 0.021$         |
|               | Acc_1    | 0.287<br>$\pm 0.031$        | 0.271<br>$\pm 0.049$ | <b>0.304</b><br>$\pm 0.079$ | 0.317<br>$\pm 0.058$        | 0.250<br>$\pm 0.044$        | 0.225<br>$\pm 0.048$        | 0.254<br>$\pm 0.050$  | 0.287<br>$\pm 0.081$ | 0.237<br>$\pm 0.043$        | 0.208<br>$\pm 0.061$        | 0.275<br>$\pm 0.040$  | 0.283<br>$\pm 0.048$  | 0.237<br>$\pm 0.046$  | 0.271<br>$\pm 0.021$  | 0.283<br>$\pm 0.038$         | 0.258<br>$\pm 0.046$         | 0.192<br>$\pm 0.034$         | 0.237<br>$\pm 0.068$         | 0.287<br>$\pm 0.050$         | 0.229<br>$\pm 0.021$         |
|               | Acc_2    | 0.517<br>$\pm 0.077$        | 0.521<br>$\pm 0.066$ | <b>0.554</b><br>$\pm 0.065$ | 0.575<br>$\pm 0.073$        | 0.492<br>$\pm 0.019$        | 0.512<br>$\pm 0.072$        | 0.546<br>$\pm 0.099$  | 0.537<br>$\pm 0.017$ | 0.500<br>$\pm 0.053$        | 0.467<br>$\pm 0.052$        | 0.546<br>$\pm 0.085$  | 0.542<br>$\pm 0.049$  | 0.442<br>$\pm 0.054$  | 0.483<br>$\pm 0.070$  | 0.512<br>$\pm 0.060$         | 0.492<br>$\pm 0.050$         | 0.454<br>$\pm 0.040$         | 0.529<br>$\pm 0.062$         | 0.553<br>$\pm 0.050$         | 0.492<br>$\pm 0.067$         |
| $\kappa$      |          | -0.024<br>$\pm 0.085$       | 0.012<br>$\pm 0.113$ | -0.007<br>$\pm 0.119$       | 0.026<br>$\pm 0.048$        | <b>0.049</b><br>$\pm 0.075$ | 0.006<br>$\pm 0.077$        | -0.012<br>$\pm 0.105$ | 0.012<br>$\pm 0.068$ | 0.054<br>$\pm 0.068$        | 0.028<br>$\pm 0.066$        | -0.020<br>$\pm 0.046$ | 0.025<br>$\pm 0.061$  | 0.024<br>$\pm 0.029$  | -0.029<br>$\pm 0.042$ | 0.031<br>$\pm 0.049$         | -0.029<br>$\pm 0.109$        | -0.023<br>$\pm 0.076$        | 0.010<br>$\pm 0.038$         | 0.037<br>$\pm 0.112$         | -0.032<br>$\pm 0.097$        |
| sub6          |          | Continued on next page      |                      |                             |                             |                             |                             |                       |                      |                             |                             |                       |                       |                       |                       |                              |                              |                              |                              |                              |                              |

| SubjectMetric |          | DeepConvnet                    | EEGNet                         | Conformer                      | CTNet                          | BIOT (i)                       | BIOT (i)        | BENDR (i)       | BENDR (i)        | CBraMod (i)                    | CBraMod (i)     | EEGPT (i)        | EEGPT (i)                      | LaBraM (i)       | LaBraM (i)       | STEEGformer-s (i) | STEEGformer-s (i) | STEEGformer-b (i) | STEEGformer-b (i) | STEEGformer-h (i) | STEEGformer-h (i)              |
|---------------|----------|--------------------------------|--------------------------------|--------------------------------|--------------------------------|--------------------------------|-----------------|-----------------|------------------|--------------------------------|-----------------|------------------|--------------------------------|------------------|------------------|-------------------|-------------------|-------------------|-------------------|-------------------|--------------------------------|
|               | AUC      | 0.495<br>±0.050                | 0.506<br>±0.051                | 0.515<br>±0.067                | 0.506<br>±0.024                | 0.504<br>±0.025                | 0.499<br>±0.033 | 0.518<br>±0.093 | 0.487<br>±0.020  | 0.553<br>±0.071                | 0.497<br>±0.077 | 0.502<br>±0.045  | <b>0.536</b><br>± <b>0.054</b> | 0.519<br>±0.041  | 0.461<br>±0.013  | 0.519<br>±0.017   | 0.500<br>±0.051   | 0.514<br>±0.052   | 0.517<br>±0.027   | 0.529<br>±0.078   | 0.496<br>±0.050                |
|               | BAcc     | 0.232<br>±0.066                | 0.258<br>±0.087                | 0.245<br>±0.093                | 0.271<br>±0.037                | <b>0.287</b><br>± <b>0.055</b> | 0.255<br>±0.056 | 0.240<br>±0.078 | 0.258<br>±0.052  | 0.290<br>±0.050                | 0.270<br>±0.051 | 0.235<br>±0.033  | 0.269<br>±0.045                | 0.268<br>±0.021  | 0.228<br>±0.032  | 0.273<br>±0.036   | 0.229<br>±0.082   | 0.234<br>±0.058   | 0.257<br>±0.029   | 0.279<br>±0.085   | 0.226<br>±0.073                |
|               | Acc.1    | 0.231<br>±0.064                | 0.259<br>±0.085                | 0.245<br>±0.089                | 0.269<br>±0.037                | 0.287<br>±0.059                | 0.254<br>±0.057 | 0.241<br>±0.079 | 0.259<br>±0.051  | <b>0.292</b><br>± <b>0.051</b> | 0.273<br>±0.050 | 0.236<br>±0.035  | 0.268<br>±0.046                | 0.268<br>±0.020  | 0.227<br>±0.032  | 0.273<br>±0.037   | 0.227<br>±0.080   | 0.232<br>±0.056   | 0.259<br>±0.029   | 0.293<br>±0.077   | 0.227<br>±0.070                |
|               | Acc.2    | 0.477<br>±0.063                | 0.490<br>±0.065                | <b>0.537</b><br>± <b>0.087</b> | 0.528<br>±0.026                | 0.500<br>±0.050                | 0.523<br>±0.082 | 0.514<br>±0.080 | 0.496<br>±0.030  | 0.509<br>±0.096                | 0.505<br>±0.046 | 0.504<br>±0.058  | 0.556<br>±0.044                | 0.495<br>±0.034  | 0.468<br>±0.057  | 0.523<br>±0.028   | 0.528<br>±0.050   | 0.491<br>±0.089   | 0.518<br>±0.041   | 0.498<br>±0.090   | 0.481<br>±0.074                |
|               | $\kappa$ | 0.106<br>±0.110                | 0.067<br>±0.064                | 0.039<br>±0.080                | <b>0.089</b><br>± <b>0.105</b> | -0.044<br>±0.058               | 0.022<br>±0.084 | 0.039<br>±0.099 | -0.006<br>±0.053 | 0.033<br>±0.063                | 0.050<br>±0.041 | -0.028<br>±0.119 | 0.044<br>±0.067                | -0.089<br>±0.023 | -0.017<br>±0.093 | -0.039<br>±0.101  | -0.039<br>±0.032  | -0.033<br>±0.123  | -0.028<br>±0.052  | -0.022<br>±0.097  | -0.006<br>±0.082               |
| sub7          | AUC      | 0.606<br>±0.054                | 0.556<br>±0.029                | 0.526<br>±0.052                | <b>0.581</b><br>± <b>0.040</b> | 0.475<br>±0.059                | 0.520<br>±0.048 | 0.539<br>±0.063 | 0.499<br>±0.035  | 0.562<br>±0.038                | 0.495<br>±0.063 | 0.478<br>±0.061  | 0.539<br>±0.052                | 0.458<br>±0.023  | 0.471<br>±0.063  | 0.472<br>±0.071   | 0.457<br>±0.038   | 0.499<br>±0.068   | 0.467<br>±0.038   | 0.496<br>±0.052   | 0.415<br>±0.059                |
|               | BAcc     | 0.329<br>±0.083                | 0.300<br>±0.048                | 0.279<br>±0.060                | <b>0.317</b><br>± <b>0.079</b> | 0.217<br>±0.043                | 0.267<br>±0.063 | 0.279<br>±0.075 | 0.246<br>±0.040  | 0.275<br>±0.048                | 0.287<br>±0.031 | 0.229<br>±0.090  | 0.283<br>±0.050                | 0.183<br>±0.017  | 0.237<br>±0.070  | 0.221<br>±0.076   | 0.221<br>±0.024   | 0.225<br>±0.092   | 0.229<br>±0.039   | 0.233<br>±0.073   | 0.246<br>±0.061                |
|               | Acc.1    | 0.329<br>±0.083                | 0.300<br>±0.048                | 0.279<br>±0.060                | <b>0.317</b><br>± <b>0.079</b> | 0.217<br>±0.043                | 0.267<br>±0.063 | 0.279<br>±0.075 | 0.246<br>±0.040  | 0.275<br>±0.048                | 0.287<br>±0.031 | 0.229<br>±0.090  | 0.283<br>±0.050                | 0.183<br>±0.017  | 0.237<br>±0.070  | 0.221<br>±0.076   | 0.221<br>±0.024   | 0.225<br>±0.092   | 0.229<br>±0.039   | 0.222<br>±0.056   | 0.246<br>±0.061                |
|               | Acc.2    | <b>0.588</b><br>± <b>0.045</b> | 0.562<br>±0.044                | 0.525<br>±0.061                | 0.600<br>±0.048                | 0.479<br>±0.069                | 0.487<br>±0.035 | 0.567<br>±0.107 | 0.496<br>±0.045  | 0.571<br>±0.043                | 0.525<br>±0.083 | 0.492<br>±0.032  | 0.546<br>±0.054                | 0.454<br>±0.040  | 0.467<br>±0.088  | 0.454<br>±0.074   | 0.463<br>±0.081   | 0.463<br>±0.045   | 0.462<br>±0.077   | 0.509<br>±0.051   | 0.446<br>±0.070                |
|               | $\kappa$ | 0.133<br>±0.103                | <b>0.160</b><br>± <b>0.072</b> | 0.133<br>±0.137                | 0.213<br>±0.102                | 0.047<br>±0.096                | 0.087<br>±0.128 | 0.133<br>±0.108 | -0.027<br>±0.106 | 0.213<br>±0.102                | 0.067<br>±0.062 | 0.053<br>±0.107  | 0.040<br>±0.037                | 0.033<br>±0.122  | -0.067<br>±0.078 | 0.020<br>±0.112   | -0.087<br>±0.099  | 0.053<br>±0.069   | 0.040<br>±0.072   | 0.053<br>±0.110   | -0.073<br>±0.055               |
| sub8          | AUC      | 0.616<br>±0.079                | 0.656<br>±0.028                | 0.595<br>±0.086                | 0.697<br>±0.048                | 0.531<br>±0.076                | 0.534<br>±0.084 | 0.575<br>±0.039 | 0.468<br>±0.057  | <b>0.657</b><br>± <b>0.085</b> | 0.619<br>±0.056 | 0.540<br>±0.052  | 0.541<br>±0.022                | 0.510<br>±0.082  | 0.512<br>±0.031  | 0.510<br>±0.079   | 0.443<br>±0.072   | 0.571<br>±0.046   | 0.493<br>±0.068   | 0.534<br>±0.071   | 0.462<br>±0.046                |
|               | BAcc     | 0.350<br>±0.077                | <b>0.370</b><br>± <b>0.054</b> | 0.350<br>±0.103                | 0.410<br>±0.076                | 0.285<br>±0.072                | 0.315<br>±0.096 | 0.350<br>±0.081 | 0.230<br>±0.080  | 0.410<br>±0.076                | 0.300<br>±0.047 | 0.290<br>±0.080  | 0.280<br>±0.027                | 0.275<br>±0.092  | 0.200<br>±0.059  | 0.265<br>±0.084   | 0.185<br>±0.074   | 0.290<br>±0.052   | 0.280<br>±0.054   | 0.290<br>±0.082   | 0.195<br>±0.041                |
|               | Acc.1    | 0.350<br>±0.077                | <b>0.370</b><br>± <b>0.054</b> | 0.350<br>±0.103                | 0.410<br>±0.076                | 0.285<br>±0.072                | 0.315<br>±0.096 | 0.350<br>±0.081 | 0.230<br>±0.080  | 0.410<br>±0.076                | 0.300<br>±0.047 | 0.290<br>±0.080  | 0.280<br>±0.027                | 0.275<br>±0.092  | 0.200<br>±0.059  | 0.265<br>±0.084   | 0.185<br>±0.074   | 0.290<br>±0.052   | 0.280<br>±0.054   | 0.294<br>±0.103   | 0.195<br>±0.041                |
|               | Acc.2    | 0.620<br>±0.157                | 0.645<br>±0.021                | 0.595<br>±0.096                | 0.710<br>±0.084                | 0.520<br>±0.086                | 0.500<br>±0.088 | 0.575<br>±0.050 | 0.445<br>±0.045  | <b>0.685</b><br>± <b>0.101</b> | 0.565<br>±0.129 | 0.535<br>±0.070  | 0.545<br>±0.021                | 0.550<br>±0.130  | 0.540<br>±0.068  | 0.475<br>±0.090   | 0.410<br>±0.089   | 0.570<br>±0.060   | 0.510<br>±0.096   | 0.500<br>±0.158   | 0.455<br>±0.048                |
|               | $\kappa$ | 0.044<br>±0.058                | 0.050<br>±0.144                | 0.072<br>±0.058                | 0.111<br>±0.094                | 0.050<br>±0.023                | 0.006<br>±0.050 | 0.050<br>±0.087 | -0.022<br>±0.077 | 0.083<br>±0.094                | 0.033<br>±0.087 | 0.056<br>±0.073  | 0.078<br>±0.114                | -0.006<br>±0.030 | 0.028<br>±0.081  | 0.006<br>±0.126   | 0.044<br>±0.072   | -0.022<br>±0.095  | 0.006<br>±0.093   | 0.067<br>±0.085   | <b>0.089</b><br>± <b>0.023</b> |
| sub9          | AUC      | 0.556<br>±0.046                | 0.552<br>±0.066                | 0.556<br>±0.047                | <b>0.587</b><br>± <b>0.068</b> | 0.534<br>±0.039                | 0.532<br>±0.044 | 0.559<br>±0.062 | 0.482<br>±0.046  | 0.576<br>±0.063                | 0.562<br>±0.054 | 0.549<br>±0.037  | 0.567<br>±0.069                | 0.503<br>±0.010  | 0.536<br>±0.064  | 0.528<br>±0.094   | 0.516<br>±0.071   | 0.487<br>±0.065   | 0.513<br>±0.067   | 0.553<br>±0.058   | 0.597<br>±0.074                |

Continued on next page

|               |             |                 |                 |                 |                  |                 |                 |                  |                 |                  |                 |                 |                 |                 |                   |                   |                   |                   |                   |                   |                  |      |
|---------------|-------------|-----------------|-----------------|-----------------|------------------|-----------------|-----------------|------------------|-----------------|------------------|-----------------|-----------------|-----------------|-----------------|-------------------|-------------------|-------------------|-------------------|-------------------|-------------------|------------------|------|
|               |             |                 |                 |                 |                  |                 |                 |                  |                 |                  |                 |                 |                 |                 |                   |                   |                   |                   |                   |                   |                  | 4947 |
|               |             |                 |                 |                 |                  |                 |                 |                  |                 |                  |                 |                 |                 |                 |                   |                   |                   |                   |                   |                   |                  | 4948 |
|               |             |                 |                 |                 |                  |                 |                 |                  |                 |                  |                 |                 |                 |                 |                   |                   |                   |                   |                   |                   |                  | 4949 |
|               |             |                 |                 |                 |                  |                 |                 |                  |                 |                  |                 |                 |                 |                 |                   |                   |                   |                   |                   |                   |                  | 4950 |
|               |             |                 |                 |                 |                  |                 |                 |                  |                 |                  |                 |                 |                 |                 |                   |                   |                   |                   |                   |                   |                  | 4951 |
|               |             |                 |                 |                 |                  |                 |                 |                  |                 |                  |                 |                 |                 |                 |                   |                   |                   |                   |                   |                   |                  | 4952 |
|               |             |                 |                 |                 |                  |                 |                 |                  |                 |                  |                 |                 |                 |                 |                   |                   |                   |                   |                   |                   |                  | 4953 |
|               |             |                 |                 |                 |                  |                 |                 |                  |                 |                  |                 |                 |                 |                 |                   |                   |                   |                   |                   |                   |                  | 4954 |
|               |             |                 |                 |                 |                  |                 |                 |                  |                 |                  |                 |                 |                 |                 |                   |                   |                   |                   |                   |                   |                  | 4955 |
|               |             |                 |                 |                 |                  |                 |                 |                  |                 |                  |                 |                 |                 |                 |                   |                   |                   |                   |                   |                   |                  | 4956 |
|               |             |                 |                 |                 |                  |                 |                 |                  |                 |                  |                 |                 |                 |                 |                   |                   |                   |                   |                   |                   |                  | 4957 |
|               |             |                 |                 |                 |                  |                 |                 |                  |                 |                  |                 |                 |                 |                 |                   |                   |                   |                   |                   |                   |                  | 4958 |
|               |             |                 |                 |                 |                  |                 |                 |                  |                 |                  |                 |                 |                 |                 |                   |                   |                   |                   |                   |                   |                  | 4959 |
|               |             |                 |                 |                 |                  |                 |                 |                  |                 |                  |                 |                 |                 |                 |                   |                   |                   |                   |                   |                   |                  | 4960 |
|               |             |                 |                 |                 |                  |                 |                 |                  |                 |                  |                 |                 |                 |                 |                   |                   |                   |                   |                   |                   |                  | 4961 |
|               |             |                 |                 |                 |                  |                 |                 |                  |                 |                  |                 |                 |                 |                 |                   |                   |                   |                   |                   |                   |                  | 4962 |
|               |             |                 |                 |                 |                  |                 |                 |                  |                 |                  |                 |                 |                 |                 |                   |                   |                   |                   |                   |                   |                  | 4963 |
|               |             |                 |                 |                 |                  |                 |                 |                  |                 |                  |                 |                 |                 |                 |                   |                   |                   |                   |                   |                   |                  | 4964 |
|               |             |                 |                 |                 |                  |                 |                 |                  |                 |                  |                 |                 |                 |                 |                   |                   |                   |                   |                   |                   |                  | 4965 |
|               |             |                 |                 |                 |                  |                 |                 |                  |                 |                  |                 |                 |                 |                 |                   |                   |                   |                   |                   |                   |                  | 4966 |
|               |             |                 |                 |                 |                  |                 |                 |                  |                 |                  |                 |                 |                 |                 |                   |                   |                   |                   |                   |                   |                  | 4967 |
|               |             |                 |                 |                 |                  |                 |                 |                  |                 |                  |                 |                 |                 |                 |                   |                   |                   |                   |                   |                   |                  | 4968 |
|               |             |                 |                 |                 |                  |                 |                 |                  |                 |                  |                 |                 |                 |                 |                   |                   |                   |                   |                   |                   |                  | 4969 |
|               |             |                 |                 |                 |                  |                 |                 |                  |                 |                  |                 |                 |                 |                 |                   |                   |                   |                   |                   |                   |                  | 4970 |
|               |             |                 |                 |                 |                  |                 |                 |                  |                 |                  |                 |                 |                 |                 |                   |                   |                   |                   |                   |                   |                  | 4971 |
|               |             |                 |                 |                 |                  |                 |                 |                  |                 |                  |                 |                 |                 |                 |                   |                   |                   |                   |                   |                   |                  | 4972 |
|               |             |                 |                 |                 |                  |                 |                 |                  |                 |                  |                 |                 |                 |                 |                   |                   |                   |                   |                   |                   |                  | 4973 |
|               |             |                 |                 |                 |                  |                 |                 |                  |                 |                  |                 |                 |                 |                 |                   |                   |                   |                   |                   |                   |                  | 4974 |
|               |             |                 |                 |                 |                  |                 |                 |                  |                 |                  |                 |                 |                 |                 |                   |                   |                   |                   |                   |                   |                  | 4975 |
|               |             |                 |                 |                 |                  |                 |                 |                  |                 |                  |                 |                 |                 |                 |                   |                   |                   |                   |                   |                   |                  | 4976 |
|               |             |                 |                 |                 |                  |                 |                 |                  |                 |                  |                 |                 |                 |                 |                   |                   |                   |                   |                   |                   |                  | 4977 |
|               |             |                 |                 |                 |                  |                 |                 |                  |                 |                  |                 |                 |                 |                 |                   |                   |                   |                   |                   |                   |                  | 4978 |
|               |             |                 |                 |                 |                  |                 |                 |                  |                 |                  |                 |                 |                 |                 |                   |                   |                   |                   |                   |                   |                  | 4979 |
| SubjectMetric | DeepConvnet | EEGNet          | Conformer       | CTNet           | BIOT (f)         | BIOT (f)        | BENDR (f)       | BENDR (f)        | CBraMod (f)     | CBraMod (f)      | EEGPT (f)       | EEGPT (f)       | LaBraM (f)      | LaBraM (f)      | STEEGformer-s (f) | STEEGformer-s (f) | STEEGformer-b (f) | STEEGformer-b (f) | STEEGformer-l (f) | STEEGformer-l (f) |                  |      |
|               | BAcc        | 0.283<br>±0.043 | 0.287<br>±0.108 | 0.304<br>±0.043 | 0.333<br>± 0.071 | 0.287<br>±0.017 | 0.254<br>±0.037 | 0.287<br>±0.065  | 0.233<br>±0.058 | 0.312<br>±0.071  | 0.275<br>±0.065 | 0.292<br>±0.055 | 0.308<br>±0.085 | 0.246<br>±0.023 | 0.271<br>±0.061   | 0.254<br>±0.095   | 0.283<br>±0.054   | 0.233<br>±0.071   | 0.254<br>±0.070   | 0.300<br>±0.064   | 0.317<br>± 0.017 |      |
|               | Acc_1       | 0.283<br>±0.043 | 0.287<br>±0.108 | 0.304<br>±0.043 | 0.333<br>± 0.071 | 0.287<br>±0.017 | 0.254<br>±0.037 | 0.287<br>±0.065  | 0.233<br>±0.058 | 0.312<br>±0.071  | 0.275<br>±0.065 | 0.292<br>±0.055 | 0.308<br>±0.085 | 0.246<br>±0.023 | 0.271<br>±0.061   | 0.254<br>±0.095   | 0.283<br>±0.054   | 0.233<br>±0.071   | 0.254<br>±0.070   | 0.272<br>±0.041   | 0.317<br>± 0.017 |      |
|               | Acc_2       | 0.550<br>±0.041 | 0.533<br>±0.104 | 0.575<br>±0.084 | 0.592<br>±0.070  | 0.562<br>±0.051 | 0.542<br>±0.093 | 0.621<br>± 0.097 | 0.487<br>±0.073 | 0.600<br>± 0.110 | 0.546<br>±0.045 | 0.558<br>±0.068 | 0.592<br>±0.067 | 0.508<br>±0.032 | 0.533<br>±0.077   | 0.562<br>±0.087   | 0.529<br>±0.083   | 0.508<br>±0.058   | 0.517<br>±0.061   | 0.566<br>±0.092   | 0.571<br>±0.070  |      |

## E.3.3 GENERALIZATION DROP AFTER FINE-TUNING

Table 49: Average Model Performance Drop

| Model (Strategy)         | $\kappa$    | AUC         | BAcc        | Acc.1       | Acc.2       |
|--------------------------|-------------|-------------|-------------|-------------|-------------|
|                          | 0.021       | 0.020       | 0.016       | 0.016       | 0.021       |
| <b>DeepConvnet</b>       | $\pm 0.018$ | $\pm 0.013$ | $\pm 0.014$ | $\pm 0.014$ | $\pm 0.016$ |
|                          | 0.007       | 0.010       | 0.006       | 0.005       | 0.018       |
| <b>EEGNet</b>            | $\pm 0.015$ | $\pm 0.011$ | $\pm 0.012$ | $\pm 0.011$ | $\pm 0.011$ |
|                          | 0.003       | 0.008       | 0.002       | 0.002       | 0.012       |
| <b>Conformer</b>         | $\pm 0.010$ | $\pm 0.010$ | $\pm 0.008$ | $\pm 0.008$ | $\pm 0.010$ |
|                          | 0.026       | 0.026       | 0.020       | 0.020       | 0.023       |
| <b>CTNet</b>             | $\pm 0.022$ | $\pm 0.013$ | $\pm 0.017$ | $\pm 0.017$ | $\pm 0.016$ |
|                          | 0.001       | 0.003       | 0.001       | 0.001       | 0.005       |
| <b>BIOT (f)</b>          | $\pm 0.017$ | $\pm 0.007$ | $\pm 0.013$ | $\pm 0.013$ | $\pm 0.008$ |
|                          | -0.009      | -0.003      | -0.007      | -0.007      | -0.011      |
| <b>BIOT (l)</b>          | $\pm 0.016$ | $\pm 0.010$ | $\pm 0.012$ | $\pm 0.012$ | $\pm 0.019$ |
|                          | 0.008       | 0.007       | 0.006       | 0.005       | 0.007       |
| <b>BENDR (f)</b>         | $\pm 0.014$ | $\pm 0.009$ | $\pm 0.010$ | $\pm 0.011$ | $\pm 0.018$ |
|                          | -0.004      | -0.000      | -0.003      | -0.003      | -0.003      |
| <b>BENDR (l)</b>         | $\pm 0.016$ | $\pm 0.005$ | $\pm 0.012$ | $\pm 0.012$ | $\pm 0.008$ |
|                          | 0.015       | 0.014       | 0.011       | 0.011       | 0.010       |
| <b>CBraMod (f)</b>       | $\pm 0.016$ | $\pm 0.010$ | $\pm 0.012$ | $\pm 0.012$ | $\pm 0.012$ |
|                          | 0.022       | 0.017       | 0.016       | 0.016       | 0.016       |
| <b>CBraMod (l)</b>       | $\pm 0.013$ | $\pm 0.010$ | $\pm 0.010$ | $\pm 0.010$ | $\pm 0.008$ |
|                          | 0.008       | 0.003       | 0.006       | 0.006       | 0.000       |
| <b>EEGPT (f)</b>         | $\pm 0.013$ | $\pm 0.008$ | $\pm 0.010$ | $\pm 0.009$ | $\pm 0.013$ |
|                          | 0.023       | 0.019       | 0.017       | 0.017       | 0.017       |
| <b>EEGPT (l)</b>         | $\pm 0.012$ | $\pm 0.007$ | $\pm 0.009$ | $\pm 0.009$ | $\pm 0.014$ |
|                          | -0.002      | 0.003       | -0.002      | -0.002      | 0.002       |
| <b>LaBraM (f)</b>        | $\pm 0.009$ | $\pm 0.006$ | $\pm 0.007$ | $\pm 0.007$ | $\pm 0.013$ |
|                          | 0.001       | 0.002       | 0.001       | 0.001       | 0.001       |
| <b>LaBraM (l)</b>        | $\pm 0.018$ | $\pm 0.010$ | $\pm 0.014$ | $\pm 0.014$ | $\pm 0.015$ |
|                          | 0.003       | 0.001       | 0.002       | 0.002       | 0.005       |
| <b>STEEGformer-s (f)</b> | $\pm 0.012$ | $\pm 0.007$ | $\pm 0.009$ | $\pm 0.009$ | $\pm 0.013$ |
|                          | -0.005      | -0.004      | -0.003      | -0.003      | -0.009      |
| <b>STEEGformer-s (l)</b> | $\pm 0.013$ | $\pm 0.009$ | $\pm 0.010$ | $\pm 0.010$ | $\pm 0.012$ |
|                          | -0.006      | 0.000       | -0.004      | -0.004      | 0.003       |
| <b>STEEGformer-b (f)</b> | $\pm 0.013$ | $\pm 0.008$ | $\pm 0.009$ | $\pm 0.009$ | $\pm 0.010$ |
|                          | 0.000       | -0.002      | 0.000       | -0.000      | -0.002      |
| <b>STEEGformer-b (l)</b> | $\pm 0.016$ | $\pm 0.006$ | $\pm 0.012$ | $\pm 0.012$ | $\pm 0.013$ |
|                          | -0.001      | -0.002      | -0.001      | -0.002      | -0.001      |
| <b>STEEGformer-l (f)</b> | $\pm 0.009$ | $\pm 0.005$ | $\pm 0.007$ | $\pm 0.011$ | $\pm 0.012$ |
|                          | -0.007      | -0.004      | -0.005      | -0.006      | -0.009      |
| <b>STEEGformer-l (l)</b> | $\pm 0.013$ | $\pm 0.010$ | $\pm 0.009$ | $\pm 0.010$ | $\pm 0.012$ |

Table 50: Per-Subject Average Drop on Seen Subjects (Post-Fine-Tuning).

| Subject | Metric   | DeepConvnet           | EEGNet                | Conformer             | CTNet                | BIOT (f)              | BIOT (l)              | BENDR (f)             | BENDR (l)             | CBraMod (f)           | CBraMod (l)          | EEGPT (f)             | EEGPT (l)            | LaBraM (f)            | LaBraM (l)            | STEEGformer-s (f)     | STEEGformer-s (l)     | STEEGformer-b (f)     | STEEGformer-b (l)     | STEEGformer-l (f)     | STEEGformer-l (l)     |
|---------|----------|-----------------------|-----------------------|-----------------------|----------------------|-----------------------|-----------------------|-----------------------|-----------------------|-----------------------|----------------------|-----------------------|----------------------|-----------------------|-----------------------|-----------------------|-----------------------|-----------------------|-----------------------|-----------------------|-----------------------|
| sub1    | $\kappa$ | 0.022<br>$\pm 0.048$  | -0.007<br>$\pm 0.052$ | -0.023<br>$\pm 0.056$ | 0.037<br>$\pm 0.045$ | 0.019<br>$\pm 0.044$  | 0.006<br>$\pm 0.058$  | 0.015<br>$\pm 0.044$  | 0.002<br>$\pm 0.018$  | 0.034<br>$\pm 0.038$  | 0.028<br>$\pm 0.035$ | 0.020<br>$\pm 0.069$  | 0.036<br>$\pm 0.050$ | 0.008<br>$\pm 0.043$  | -0.024<br>$\pm 0.041$ | 0.011<br>$\pm 0.019$  | -0.024<br>$\pm 0.021$ | -0.010<br>$\pm 0.042$ | -0.007<br>$\pm 0.033$ | -0.002<br>$\pm 0.027$ | -0.022<br>$\pm 0.032$ |
|         | AUC      | 0.008<br>$\pm 0.031$  | -0.000<br>$\pm 0.022$ | -0.015<br>$\pm 0.032$ | 0.023<br>$\pm 0.024$ | 0.015<br>$\pm 0.020$  | -0.005<br>$\pm 0.039$ | 0.015<br>$\pm 0.023$  | 0.003<br>$\pm 0.013$  | 0.025<br>$\pm 0.031$  | 0.027<br>$\pm 0.033$ | 0.007<br>$\pm 0.024$  | 0.018<br>$\pm 0.024$ | 0.013<br>$\pm 0.027$  | -0.014<br>$\pm 0.025$ | 0.006<br>$\pm 0.012$  | -0.015<br>$\pm 0.013$ | 0.002<br>$\pm 0.020$  | -0.006<br>$\pm 0.014$ | 0.001<br>$\pm 0.018$  | -0.010<br>$\pm 0.017$ |
|         | BAcc     | 0.016<br>$\pm 0.036$  | -0.005<br>$\pm 0.039$ | -0.017<br>$\pm 0.042$ | 0.027<br>$\pm 0.033$ | 0.014<br>$\pm 0.033$  | 0.005<br>$\pm 0.043$  | 0.012<br>$\pm 0.033$  | 0.002<br>$\pm 0.014$  | 0.025<br>$\pm 0.029$  | 0.021<br>$\pm 0.026$ | 0.015<br>$\pm 0.052$  | 0.027<br>$\pm 0.037$ | 0.006<br>$\pm 0.032$  | -0.018<br>$\pm 0.031$ | 0.008<br>$\pm 0.014$  | -0.018<br>$\pm 0.016$ | -0.008<br>$\pm 0.031$ | -0.005<br>$\pm 0.025$ | -0.002<br>$\pm 0.020$ | -0.016<br>$\pm 0.024$ |
|         | Acc.1    | 0.017<br>$\pm 0.035$  | -0.005<br>$\pm 0.039$ | -0.017<br>$\pm 0.042$ | 0.028<br>$\pm 0.033$ | 0.015<br>$\pm 0.033$  | 0.005<br>$\pm 0.043$  | 0.011<br>$\pm 0.033$  | 0.001<br>$\pm 0.014$  | 0.025<br>$\pm 0.029$  | 0.021<br>$\pm 0.027$ | 0.015<br>$\pm 0.051$  | 0.027<br>$\pm 0.037$ | 0.006<br>$\pm 0.032$  | -0.018<br>$\pm 0.030$ | 0.008<br>$\pm 0.014$  | -0.018<br>$\pm 0.017$ | -0.008<br>$\pm 0.031$ | -0.006<br>$\pm 0.023$ | -0.011<br>$\pm 0.029$ | -0.018<br>$\pm 0.026$ |
|         | Acc.2    | -0.003<br>$\pm 0.038$ | 0.011<br>$\pm 0.018$  | -0.007<br>$\pm 0.034$ | 0.023<br>$\pm 0.038$ | 0.010<br>$\pm 0.037$  | -0.010<br>$\pm 0.041$ | 0.004<br>$\pm 0.025$  | 0.007<br>$\pm 0.029$  | 0.034<br>$\pm 0.036$  | 0.015<br>$\pm 0.029$ | -0.003<br>$\pm 0.042$ | 0.005<br>$\pm 0.030$ | 0.006<br>$\pm 0.044$  | -0.011<br>$\pm 0.025$ | 0.017<br>$\pm 0.032$  | -0.029<br>$\pm 0.037$ | 0.008<br>$\pm 0.030$  | -0.004<br>$\pm 0.028$ | 0.020<br>$\pm 0.054$  | -0.011<br>$\pm 0.038$ |
| sub10   | $\kappa$ | 0.026<br>$\pm 0.035$  | 0.047<br>$\pm 0.059$  | 0.003<br>$\pm 0.053$  | 0.024<br>$\pm 0.032$ | 0.011<br>$\pm 0.048$  | -0.023<br>$\pm 0.042$ | -0.005<br>$\pm 0.031$ | -0.019<br>$\pm 0.028$ | 0.007<br>$\pm 0.050$  | 0.013<br>$\pm 0.041$ | -0.004<br>$\pm 0.035$ | 0.003<br>$\pm 0.036$ | 0.007<br>$\pm 0.043$  | -0.016<br>$\pm 0.035$ | 0.004<br>$\pm 0.051$  | 0.012<br>$\pm 0.060$  | -0.001<br>$\pm 0.035$ | 0.010<br>$\pm 0.030$  | 0.001<br>$\pm 0.038$  | -0.015<br>$\pm 0.035$ |
|         | AUC      | 0.028<br>$\pm 0.020$  | 0.033<br>$\pm 0.032$  | 0.012<br>$\pm 0.030$  | 0.032<br>$\pm 0.023$ | 0.009<br>$\pm 0.020$  | -0.004<br>$\pm 0.027$ | 0.001<br>$\pm 0.021$  | -0.008<br>$\pm 0.015$ | 0.002<br>$\pm 0.017$  | 0.008<br>$\pm 0.021$ | -0.003<br>$\pm 0.020$ | 0.017<br>$\pm 0.024$ | 0.009<br>$\pm 0.026$  | 0.004<br>$\pm 0.025$  | 0.011<br>$\pm 0.026$  | -0.001<br>$\pm 0.021$ | -0.006<br>$\pm 0.017$ | 0.002<br>$\pm 0.022$  | -0.003<br>$\pm 0.014$ | 0.007<br>$\pm 0.021$  |
|         | BAcc     | 0.019<br>$\pm 0.027$  | 0.035<br>$\pm 0.044$  | 0.003<br>$\pm 0.040$  | 0.018<br>$\pm 0.024$ | 0.008<br>$\pm 0.036$  | -0.018<br>$\pm 0.032$ | -0.004<br>$\pm 0.024$ | -0.014<br>$\pm 0.021$ | 0.005<br>$\pm 0.037$  | 0.009<br>$\pm 0.030$ | -0.003<br>$\pm 0.026$ | 0.002<br>$\pm 0.027$ | 0.005<br>$\pm 0.032$  | -0.012<br>$\pm 0.026$ | 0.003<br>$\pm 0.038$  | 0.009<br>$\pm 0.045$  | -0.001<br>$\pm 0.026$ | 0.007<br>$\pm 0.022$  | 0.000<br>$\pm 0.028$  | -0.011<br>$\pm 0.026$ |
|         | Acc.1    | 0.019<br>$\pm 0.027$  | 0.035<br>$\pm 0.044$  | 0.003<br>$\pm 0.040$  | 0.018<br>$\pm 0.024$ | 0.008<br>$\pm 0.036$  | -0.018<br>$\pm 0.032$ | -0.004<br>$\pm 0.024$ | -0.014<br>$\pm 0.021$ | 0.005<br>$\pm 0.037$  | 0.010<br>$\pm 0.031$ | -0.003<br>$\pm 0.026$ | 0.002<br>$\pm 0.027$ | 0.005<br>$\pm 0.033$  | -0.013<br>$\pm 0.025$ | 0.003<br>$\pm 0.038$  | 0.009<br>$\pm 0.045$  | -0.000<br>$\pm 0.025$ | 0.008<br>$\pm 0.022$  | -0.003<br>$\pm 0.031$ | -0.011<br>$\pm 0.027$ |
|         | Acc.2    | 0.013<br>$\pm 0.030$  | 0.025<br>$\pm 0.052$  | 0.015<br>$\pm 0.038$  | 0.029<br>$\pm 0.042$ | 0.003<br>$\pm 0.032$  | -0.040<br>$\pm 0.031$ | -0.012<br>$\pm 0.034$ | -0.012<br>$\pm 0.036$ | -0.006<br>$\pm 0.025$ | 0.023<br>$\pm 0.028$ | 0.005<br>$\pm 0.038$  | 0.016<br>$\pm 0.032$ | -0.006<br>$\pm 0.025$ | 0.001<br>$\pm 0.024$  | 0.012<br>$\pm 0.047$  | -0.007<br>$\pm 0.039$ | 0.006<br>$\pm 0.038$  | 0.020<br>$\pm 0.026$  | 0.002<br>$\pm 0.029$  | -0.012<br>$\pm 0.026$ |
| sub2    | $\kappa$ | 0.016<br>$\pm 0.046$  | 0.006<br>$\pm 0.053$  | 0.005<br>$\pm 0.037$  | 0.048<br>$\pm 0.067$ | -0.012<br>$\pm 0.055$ | -0.012<br>$\pm 0.050$ | 0.001<br>$\pm 0.048$  | -0.009<br>$\pm 0.052$ | 0.013<br>$\pm 0.030$  | 0.037<br>$\pm 0.022$ | 0.017<br>$\pm 0.035$  | 0.031<br>$\pm 0.043$ | -0.013<br>$\pm 0.030$ | -0.016<br>$\pm 0.032$ | -0.012<br>$\pm 0.041$ | -0.004<br>$\pm 0.034$ | 0.007<br>$\pm 0.040$  | 0.025<br>$\pm 0.032$  | 0.007<br>$\pm 0.028$  | -0.025<br>$\pm 0.044$ |
|         | AUC      | 0.019<br>$\pm 0.026$  | 0.005<br>$\pm 0.018$  | 0.020<br>$\pm 0.028$  | 0.040<br>$\pm 0.039$ | 0.004<br>$\pm 0.036$  | -0.011<br>$\pm 0.023$ | 0.002<br>$\pm 0.027$  | -0.008<br>$\pm 0.030$ | 0.023<br>$\pm 0.015$  | 0.016<br>$\pm 0.020$ | 0.003<br>$\pm 0.016$  | 0.027<br>$\pm 0.030$ | -0.007<br>$\pm 0.019$ | -0.014<br>$\pm 0.019$ | -0.010<br>$\pm 0.019$ | 0.012<br>$\pm 0.028$  | 0.018<br>$\pm 0.016$  | 0.008<br>$\pm 0.016$  | -0.004<br>$\pm 0.015$ | -0.007<br>$\pm 0.026$ |
|         | BAcc     | 0.012<br>$\pm 0.035$  | 0.004<br>$\pm 0.040$  | 0.004<br>$\pm 0.027$  | 0.036<br>$\pm 0.050$ | -0.009<br>$\pm 0.041$ | -0.009<br>$\pm 0.038$ | 0.001<br>$\pm 0.036$  | -0.007<br>$\pm 0.039$ | 0.010<br>$\pm 0.022$  | 0.028<br>$\pm 0.016$ | 0.013<br>$\pm 0.026$  | 0.024<br>$\pm 0.032$ | -0.010<br>$\pm 0.022$ | -0.012<br>$\pm 0.024$ | -0.009<br>$\pm 0.031$ | -0.003<br>$\pm 0.026$ | 0.005<br>$\pm 0.030$  | 0.019<br>$\pm 0.024$  | 0.005<br>$\pm 0.021$  | -0.019<br>$\pm 0.033$ |
|         | Acc.1    | 0.012<br>$\pm 0.035$  | 0.005<br>$\pm 0.040$  | 0.004<br>$\pm 0.027$  | 0.036<br>$\pm 0.050$ | -0.009<br>$\pm 0.041$ | -0.009<br>$\pm 0.038$ | 0.000<br>$\pm 0.036$  | -0.007<br>$\pm 0.040$ | 0.010<br>$\pm 0.022$  | 0.028<br>$\pm 0.016$ | 0.013<br>$\pm 0.026$  | 0.024<br>$\pm 0.032$ | -0.011<br>$\pm 0.023$ | -0.011<br>$\pm 0.023$ | -0.009<br>$\pm 0.031$ | -0.003<br>$\pm 0.025$ | 0.005<br>$\pm 0.030$  | 0.017<br>$\pm 0.024$  | 0.001<br>$\pm 0.028$  | -0.019<br>$\pm 0.034$ |
|         | Acc.2    | 0.027<br>$\pm 0.026$  | 0.024<br>$\pm 0.038$  | 0.007<br>$\pm 0.031$  | 0.024<br>$\pm 0.058$ | 0.011<br>$\pm 0.038$  | -0.016<br>$\pm 0.041$ | 0.003<br>$\pm 0.035$  | -0.008<br>$\pm 0.026$ | 0.021<br>$\pm 0.031$  | 0.016<br>$\pm 0.024$ | 0.008<br>$\pm 0.027$  | 0.038<br>$\pm 0.039$ | -0.025<br>$\pm 0.032$ | -0.016<br>$\pm 0.033$ | -0.012<br>$\pm 0.035$ | 0.010<br>$\pm 0.045$  | 0.023<br>$\pm 0.032$  | 0.017<br>$\pm 0.029$  | -0.019<br>$\pm 0.045$ | -0.020<br>$\pm 0.029$ |

Continued on next page



| SubjectMetric |          | DeepConvnet          | EEGNet                | Conformer             | CTNet                 | BIOT (f)              | BIOT (l)              | BENDR (f)             | BENDR (l)             | CBraMod (f)           | CBraMod (l)          | EEGPT (f)             | EEGPT (l)             | LaBraM (f)            | LaBraM (l)            | STEEGformer-s (f)     | STEEGformer-s (l)     | STEEGformer-b (f)     | STEEGformer-b (l)     | STEEGformer-l (f)     | STEEGformer-l (l)     |
|---------------|----------|----------------------|-----------------------|-----------------------|-----------------------|-----------------------|-----------------------|-----------------------|-----------------------|-----------------------|----------------------|-----------------------|-----------------------|-----------------------|-----------------------|-----------------------|-----------------------|-----------------------|-----------------------|-----------------------|-----------------------|
| sub3          | $\kappa$ | 0.053<br>$\pm 0.052$ | -0.001<br>$\pm 0.029$ | 0.013<br>$\pm 0.047$  | 0.037<br>$\pm 0.055$  | 0.016<br>$\pm 0.040$  | -0.012<br>$\pm 0.042$ | 0.009<br>$\pm 0.049$  | -0.001<br>$\pm 0.042$ | 0.049<br>$\pm 0.041$  | 0.012<br>$\pm 0.028$ | 0.029<br>$\pm 0.041$  | 0.020<br>$\pm 0.051$  | -0.001<br>$\pm 0.056$ | 0.010<br>$\pm 0.058$  | 0.020<br>$\pm 0.036$  | 0.020<br>$\pm 0.040$  | 0.002<br>$\pm 0.043$  | -0.004<br>$\pm 0.028$ | -0.001<br>$\pm 0.031$ | 0.010<br>$\pm 0.052$  |
|               | AUC      | 0.042<br>$\pm 0.034$ | 0.012<br>$\pm 0.030$  | 0.012<br>$\pm 0.019$  | 0.036<br>$\pm 0.028$  | 0.012<br>$\pm 0.024$  | 0.004<br>$\pm 0.025$  | -0.005<br>$\pm 0.031$ | 0.002<br>$\pm 0.022$  | 0.033<br>$\pm 0.022$  | 0.024<br>$\pm 0.033$ | 0.016<br>$\pm 0.025$  | 0.023<br>$\pm 0.030$  | -0.001<br>$\pm 0.028$ | 0.009<br>$\pm 0.029$  | -0.001<br>$\pm 0.021$ | 0.002<br>$\pm 0.029$  | -0.004<br>$\pm 0.020$ | 0.003<br>$\pm 0.017$  | -0.005<br>$\pm 0.021$ | -0.003<br>$\pm 0.025$ |
|               | BAcc     | 0.040<br>$\pm 0.039$ | -0.001<br>$\pm 0.022$ | 0.010<br>$\pm 0.035$  | 0.028<br>$\pm 0.041$  | 0.012<br>$\pm 0.030$  | -0.009<br>$\pm 0.031$ | 0.006<br>$\pm 0.037$  | -0.001<br>$\pm 0.031$ | 0.037<br>$\pm 0.031$  | 0.009<br>$\pm 0.021$ | 0.022<br>$\pm 0.031$  | 0.015<br>$\pm 0.038$  | -0.001<br>$\pm 0.042$ | 0.008<br>$\pm 0.044$  | 0.015<br>$\pm 0.027$  | 0.014<br>$\pm 0.030$  | 0.001<br>$\pm 0.032$  | -0.003<br>$\pm 0.021$ | -0.001<br>$\pm 0.023$ | 0.007<br>$\pm 0.039$  |
|               | Acc_1    | 0.040<br>$\pm 0.039$ | -0.001<br>$\pm 0.022$ | 0.010<br>$\pm 0.035$  | 0.028<br>$\pm 0.041$  | 0.012<br>$\pm 0.030$  | -0.009<br>$\pm 0.032$ | 0.006<br>$\pm 0.037$  | -0.001<br>$\pm 0.031$ | 0.037<br>$\pm 0.030$  | 0.009<br>$\pm 0.021$ | 0.022<br>$\pm 0.031$  | 0.015<br>$\pm 0.038$  | -0.001<br>$\pm 0.042$ | 0.008<br>$\pm 0.045$  | 0.015<br>$\pm 0.027$  | 0.016<br>$\pm 0.032$  | 0.001<br>$\pm 0.032$  | -0.004<br>$\pm 0.020$ | 0.001<br>$\pm 0.025$  | 0.007<br>$\pm 0.039$  |
|               | Acc_2    | 0.039<br>$\pm 0.062$ | 0.036<br>$\pm 0.037$  | 0.023<br>$\pm 0.043$  | 0.022<br>$\pm 0.040$  | 0.000<br>$\pm 0.043$  | -0.001<br>$\pm 0.042$ | -0.015<br>$\pm 0.040$ | 0.004<br>$\pm 0.033$  | 0.013<br>$\pm 0.048$  | 0.031<br>$\pm 0.030$ | -0.010<br>$\pm 0.029$ | -0.006<br>$\pm 0.045$ | 0.005<br>$\pm 0.019$  | 0.004<br>$\pm 0.044$  | 0.018<br>$\pm 0.029$  | -0.012<br>$\pm 0.040$ | -0.008<br>$\pm 0.037$ | -0.009<br>$\pm 0.016$ | 0.009<br>$\pm 0.028$  | 0.002<br>$\pm 0.040$  |
| sub4          | $\kappa$ | 0.015<br>$\pm 0.027$ | -0.003<br>$\pm 0.031$ | -0.009<br>$\pm 0.041$ | 0.003<br>$\pm 0.049$  | -0.024<br>$\pm 0.044$ | 0.022<br>$\pm 0.035$  | 0.027<br>$\pm 0.062$  | -0.007<br>$\pm 0.035$ | -0.008<br>$\pm 0.049$ | 0.005<br>$\pm 0.040$ | -0.015<br>$\pm 0.042$ | 0.027<br>$\pm 0.059$  | 0.008<br>$\pm 0.039$  | 0.015<br>$\pm 0.049$  | 0.001<br>$\pm 0.048$  | -0.003<br>$\pm 0.040$ | -0.013<br>$\pm 0.028$ | -0.024<br>$\pm 0.030$ | -0.013<br>$\pm 0.021$ | -0.019<br>$\pm 0.034$ |
|               | AUC      | 0.014<br>$\pm 0.028$ | 0.016<br>$\pm 0.020$  | -0.000<br>$\pm 0.015$ | 0.021<br>$\pm 0.036$  | -0.004<br>$\pm 0.032$ | 0.016<br>$\pm 0.035$  | 0.021<br>$\pm 0.030$  | 0.001<br>$\pm 0.018$  | 0.014<br>$\pm 0.033$  | 0.013<br>$\pm 0.035$ | -0.014<br>$\pm 0.029$ | 0.014<br>$\pm 0.029$  | 0.005<br>$\pm 0.024$  | -0.004<br>$\pm 0.017$ | 0.003<br>$\pm 0.027$  | -0.011<br>$\pm 0.015$ | -0.002<br>$\pm 0.016$ | -0.008<br>$\pm 0.009$ | -0.011<br>$\pm 0.018$ | -0.018<br>$\pm 0.022$ |
|               | BAcc     | 0.011<br>$\pm 0.020$ | -0.002<br>$\pm 0.023$ | -0.006<br>$\pm 0.030$ | 0.002<br>$\pm 0.037$  | -0.018<br>$\pm 0.033$ | 0.017<br>$\pm 0.026$  | 0.021<br>$\pm 0.046$  | -0.005<br>$\pm 0.027$ | -0.006<br>$\pm 0.036$ | 0.004<br>$\pm 0.030$ | -0.011<br>$\pm 0.032$ | 0.020<br>$\pm 0.044$  | 0.006<br>$\pm 0.029$  | 0.012<br>$\pm 0.037$  | 0.001<br>$\pm 0.036$  | -0.002<br>$\pm 0.030$ | -0.010<br>$\pm 0.021$ | -0.002<br>$\pm 0.022$ | -0.010<br>$\pm 0.015$ | -0.014<br>$\pm 0.026$ |
|               | Acc_1    | 0.011<br>$\pm 0.020$ | -0.002<br>$\pm 0.023$ | -0.006<br>$\pm 0.030$ | 0.002<br>$\pm 0.037$  | -0.018<br>$\pm 0.033$ | 0.016<br>$\pm 0.026$  | 0.020<br>$\pm 0.046$  | -0.005<br>$\pm 0.027$ | -0.005<br>$\pm 0.035$ | 0.004<br>$\pm 0.030$ | -0.011<br>$\pm 0.032$ | 0.020<br>$\pm 0.044$  | 0.006<br>$\pm 0.029$  | 0.011<br>$\pm 0.037$  | 0.001<br>$\pm 0.036$  | -0.002<br>$\pm 0.030$ | -0.010<br>$\pm 0.021$ | -0.019<br>$\pm 0.021$ | -0.007<br>$\pm 0.022$ | -0.014<br>$\pm 0.025$ |
|               | Acc_2    | 0.008<br>$\pm 0.040$ | 0.037<br>$\pm 0.032$  | 0.011<br>$\pm 0.024$  | 0.025<br>$\pm 0.032$  | 0.003<br>$\pm 0.033$  | 0.018<br>$\pm 0.036$  | 0.026<br>$\pm 0.044$  | 0.007<br>$\pm 0.036$  | 0.017<br>$\pm 0.056$  | 0.001<br>$\pm 0.041$ | 0.001<br>$\pm 0.030$  | 0.032<br>$\pm 0.050$  | 0.016<br>$\pm 0.052$  | 0.005<br>$\pm 0.031$  | 0.008<br>$\pm 0.047$  | -0.010<br>$\pm 0.041$ | -0.005<br>$\pm 0.029$ | -0.007<br>$\pm 0.022$ | -0.006<br>$\pm 0.026$ | -0.018<br>$\pm 0.019$ |
| sub5          | $\kappa$ | 0.025<br>$\pm 0.068$ | 0.016<br>$\pm 0.028$  | -0.000<br>$\pm 0.035$ | -0.018<br>$\pm 0.058$ | 0.000<br>$\pm 0.044$  | 0.004<br>$\pm 0.042$  | -0.007<br>$\pm 0.034$ | 0.004<br>$\pm 0.023$  | 0.020<br>$\pm 0.048$  | 0.018<br>$\pm 0.031$ | -0.000<br>$\pm 0.037$ | 0.031<br>$\pm 0.055$  | 0.003<br>$\pm 0.040$  | -0.027<br>$\pm 0.030$ | 0.026<br>$\pm 0.022$  | -0.023<br>$\pm 0.041$ | -0.011<br>$\pm 0.029$ | -0.001<br>$\pm 0.035$ | 0.002<br>$\pm 0.045$  | 0.002<br>$\pm 0.029$  |
|               | AUC      | 0.026<br>$\pm 0.037$ | 0.007<br>$\pm 0.018$  | 0.010<br>$\pm 0.015$  | 0.009<br>$\pm 0.031$  | 0.001<br>$\pm 0.026$  | 0.005<br>$\pm 0.041$  | -0.003<br>$\pm 0.015$ | 0.000<br>$\pm 0.021$  | 0.008<br>$\pm 0.017$  | 0.005<br>$\pm 0.016$ | 0.001<br>$\pm 0.013$  | 0.018<br>$\pm 0.032$  | 0.004<br>$\pm 0.020$  | 0.005<br>$\pm 0.019$  | 0.009<br>$\pm 0.025$  | -0.011<br>$\pm 0.016$ | -0.003<br>$\pm 0.017$ | -0.001<br>$\pm 0.016$ | 0.002<br>$\pm 0.013$  | -0.005<br>$\pm 0.014$ |
|               | BAcc     | 0.019<br>$\pm 0.051$ | 0.012<br>$\pm 0.021$  | -0.000<br>$\pm 0.026$ | -0.013<br>$\pm 0.044$ | 0.001<br>$\pm 0.033$  | 0.003<br>$\pm 0.032$  | -0.005<br>$\pm 0.025$ | 0.003<br>$\pm 0.018$  | 0.015<br>$\pm 0.036$  | 0.014<br>$\pm 0.023$ | -0.000<br>$\pm 0.028$ | 0.023<br>$\pm 0.041$  | 0.002<br>$\pm 0.030$  | -0.020<br>$\pm 0.023$ | 0.019<br>$\pm 0.017$  | -0.017<br>$\pm 0.031$ | -0.008<br>$\pm 0.022$ | -0.001<br>$\pm 0.026$ | 0.002<br>$\pm 0.034$  | 0.002<br>$\pm 0.022$  |
|               | Acc_1    | 0.019<br>$\pm 0.051$ | 0.012<br>$\pm 0.021$  | -0.000<br>$\pm 0.026$ | -0.013<br>$\pm 0.044$ | 0.001<br>$\pm 0.033$  | 0.003<br>$\pm 0.032$  | -0.006<br>$\pm 0.025$ | 0.003<br>$\pm 0.018$  | 0.015<br>$\pm 0.036$  | 0.013<br>$\pm 0.022$ | -0.000<br>$\pm 0.028$ | 0.023<br>$\pm 0.041$  | 0.002<br>$\pm 0.030$  | -0.019<br>$\pm 0.022$ | 0.019<br>$\pm 0.017$  | -0.018<br>$\pm 0.032$ | -0.008<br>$\pm 0.022$ | -0.000<br>$\pm 0.027$ | 0.005<br>$\pm 0.035$  | 0.002<br>$\pm 0.023$  |
|               | Acc_2    | 0.048<br>$\pm 0.047$ | 0.009<br>$\pm 0.034$  | 0.012<br>$\pm 0.039$  | 0.012<br>$\pm 0.044$  | 0.018<br>$\pm 0.033$  | -0.012<br>$\pm 0.036$ | -0.013<br>$\pm 0.026$ | -0.004<br>$\pm 0.043$ | 0.007<br>$\pm 0.016$  | 0.012<br>$\pm 0.022$ | 0.002<br>$\pm 0.039$  | 0.012<br>$\pm 0.032$  | 0.006<br>$\pm 0.042$  | -0.003<br>$\pm 0.033$ | 0.028<br>$\pm 0.033$  | -0.026<br>$\pm 0.020$ | 0.005<br>$\pm 0.018$  | -0.018<br>$\pm 0.030$ | -0.012<br>$\pm 0.038$ | -0.019<br>$\pm 0.018$ |
| sub6          | $\kappa$ | 0.039<br>$\pm 0.043$ | 0.004<br>$\pm 0.039$  | 0.013<br>$\pm 0.037$  | 0.051<br>$\pm 0.037$  | 0.007<br>$\pm 0.046$  | -0.032<br>$\pm 0.038$ | 0.017<br>$\pm 0.049$  | -0.005<br>$\pm 0.065$ | -0.002<br>$\pm 0.045$ | 0.050<br>$\pm 0.046$ | 0.010<br>$\pm 0.048$  | 0.009<br>$\pm 0.035$  | -0.016<br>$\pm 0.050$ | 0.017<br>$\pm 0.059$  | -0.000<br>$\pm 0.020$ | -0.005<br>$\pm 0.027$ | -0.017<br>$\pm 0.028$ | -0.016<br>$\pm 0.033$ | 0.015<br>$\pm 0.028$  | -0.013<br>$\pm 0.034$ |

Continued on next page

| SubjectMetric |          | DeepConvnet      | EEGNet           | Conformer       | CTNet            | BIOT (f)         | BIOT (l)         | BENDR (f)        | BENDR (l)        | CBraMod (f)      | CBraMod (l)     | EEGPT (f)        | EEGPT (l)        | LaBraM (f)       | LaBraM (l)       | STEEGformer-s (f) | STEEGformer-s (l) | STEEGformer-b (f) | STEEGformer-b (l) | STEEGformer-l (f) | STEEGformer-l (l) |
|---------------|----------|------------------|------------------|-----------------|------------------|------------------|------------------|------------------|------------------|------------------|-----------------|------------------|------------------|------------------|------------------|-------------------|-------------------|-------------------|-------------------|-------------------|-------------------|
|               | AUC      | 0.032<br>±0.041  | 0.009<br>±0.019  | 0.024<br>±0.016 | 0.039<br>±0.031  | 0.002<br>±0.033  | -0.006<br>±0.026 | 0.020<br>±0.024  | 0.002<br>±0.023  | 0.004<br>±0.024  | 0.034<br>±0.042 | 0.006<br>±0.025  | 0.022<br>±0.017  | 0.008<br>±0.030  | 0.005<br>±0.030  | 0.000<br>±0.016   | -0.007<br>±0.013  | -0.007<br>±0.019  | -0.011<br>±0.014  | 0.009<br>±0.015   | -0.008<br>±0.009  |
|               | BAcc     | 0.029<br>±0.032  | 0.003<br>±0.029  | 0.010<br>±0.028 | 0.038<br>±0.028  | 0.005<br>±0.035  | -0.024<br>±0.028 | 0.012<br>±0.037  | -0.004<br>±0.049 | -0.002<br>±0.034 | 0.038<br>±0.034 | 0.007<br>±0.036  | 0.006<br>±0.027  | -0.012<br>±0.037 | 0.013<br>±0.044  | -0.000<br>±0.015  | -0.004<br>±0.020  | -0.004<br>±0.021  | -0.012<br>±0.024  | 0.011<br>±0.021   | -0.009<br>±0.025  |
|               | Acc.1    | 0.029<br>±0.032  | 0.003<br>±0.029  | 0.010<br>±0.028 | 0.038<br>±0.028  | 0.005<br>±0.035  | -0.024<br>±0.028 | 0.012<br>±0.037  | -0.004<br>±0.049 | -0.002<br>±0.034 | 0.038<br>±0.034 | 0.007<br>±0.036  | 0.006<br>±0.027  | -0.012<br>±0.037 | 0.013<br>±0.043  | -0.000<br>±0.015  | -0.005<br>±0.021  | -0.013<br>±0.021  | -0.013<br>±0.025  | 0.018<br>±0.021   | -0.010<br>±0.025  |
|               | Acc.2    | 0.032<br>±0.053  | 0.004<br>±0.027  | 0.032<br>±0.017 | 0.041<br>±0.031  | 0.013<br>±0.030  | -0.036<br>±0.030 | 0.040<br>±0.049  | -0.010<br>±0.024 | 0.008<br>±0.046  | 0.027<br>±0.030 | 0.003<br>±0.029  | 0.027<br>±0.039  | 0.018<br>±0.030  | -0.007<br>±0.052 | -0.005<br>±0.037  | -0.005<br>±0.025  | -0.005<br>±0.020  | -0.003<br>±0.037  | -0.006<br>±0.035  | 0.005<br>±0.023   |
| sub7          | $\kappa$ | -0.004<br>±0.020 | -0.008<br>±0.057 | 0.005<br>±0.042 | 0.024<br>±0.040  | -0.028<br>±0.028 | -0.001<br>±0.034 | 0.024<br>±0.051  | -0.038<br>±0.035 | 0.011<br>±0.043  | 0.018<br>±0.045 | -0.001<br>±0.039 | 0.036<br>±0.061  | -0.008<br>±0.044 | 0.023<br>±0.036  | -0.010<br>±0.033  | -0.002<br>±0.028  | 0.022<br>±0.025   | 0.028<br>±0.034   | -0.018<br>±0.019  | 0.010<br>±0.028   |
|               | AUC      | -0.004<br>±0.018 | -0.007<br>±0.031 | 0.006<br>±0.020 | 0.011<br>±0.017  | -0.005<br>±0.021 | -0.004<br>±0.018 | 0.009<br>±0.035  | -0.005<br>±0.024 | 0.011<br>±0.014  | 0.022<br>±0.025 | -0.005<br>±0.026 | 0.025<br>±0.034  | 0.006<br>±0.021  | 0.023<br>±0.025  | -0.008<br>±0.019  | 0.009<br>±0.017   | 0.010<br>±0.016   | 0.006<br>±0.010   | -0.006<br>±0.016  | 0.015<br>±0.015   |
|               | BAcc     | -0.004<br>±0.015 | -0.006<br>±0.043 | 0.004<br>±0.031 | 0.018<br>±0.030  | -0.021<br>±0.021 | -0.001<br>±0.025 | 0.018<br>±0.038  | -0.028<br>±0.026 | 0.008<br>±0.032  | 0.013<br>±0.034 | -0.001<br>±0.029 | 0.027<br>±0.046  | -0.006<br>±0.033 | 0.017<br>±0.027  | -0.007<br>±0.025  | -0.001<br>±0.021  | 0.017<br>±0.018   | 0.021<br>±0.026   | -0.013<br>±0.014  | 0.008<br>±0.021   |
|               | Acc.1    | -0.003<br>±0.015 | -0.006<br>±0.043 | 0.004<br>±0.031 | 0.018<br>±0.030  | -0.021<br>±0.021 | -0.001<br>±0.025 | 0.018<br>±0.038  | -0.028<br>±0.026 | 0.008<br>±0.032  | 0.014<br>±0.034 | -0.001<br>±0.029 | 0.027<br>±0.046  | -0.007<br>±0.033 | 0.017<br>±0.026  | -0.007<br>±0.024  | -0.002<br>±0.022  | 0.017<br>±0.019   | 0.022<br>±0.025   | -0.012<br>±0.024  | 0.008<br>±0.021   |
|               | Acc.2    | 0.004<br>±0.035  | 0.010<br>±0.041  | 0.006<br>±0.048 | 0.012<br>±0.038  | -0.007<br>±0.019 | 0.006<br>±0.027  | 0.026<br>±0.038  | -0.016<br>±0.030 | -0.008<br>±0.018 | 0.010<br>±0.020 | -0.027<br>±0.033 | 0.014<br>±0.049  | 0.009<br>±0.041  | 0.041<br>±0.021  | -0.013<br>±0.028  | 0.006<br>±0.039   | 0.016<br>±0.039   | 0.011<br>±0.039   | 0.007<br>±0.015   | -0.008<br>±0.036  |
| sub8          | $\kappa$ | -0.012<br>±0.043 | 0.004<br>±0.029  | 0.011<br>±0.043 | 0.006<br>±0.082  | -0.005<br>±0.045 | -0.012<br>±0.043 | -0.018<br>±0.044 | 0.013<br>±0.038  | 0.011<br>±0.033  | 0.013<br>±0.025 | 0.017<br>±0.042  | 0.006<br>±0.037  | 0.002<br>±0.041  | 0.019<br>±0.032  | -0.010<br>±0.031  | -0.004<br>±0.043  | -0.013<br>±0.028  | -0.015<br>±0.034  | 0.006<br>±0.026   | 0.005<br>±0.038   |
|               | AUC      | 0.007<br>±0.024  | 0.000<br>±0.018  | 0.006<br>±0.012 | 0.009<br>±0.043  | -0.010<br>±0.015 | 0.000<br>±0.036  | -0.005<br>±0.028 | 0.008<br>±0.023  | 0.001<br>±0.027  | 0.002<br>±0.022 | 0.001<br>±0.023  | 0.003<br>±0.016  | 0.002<br>±0.029  | 0.003<br>±0.024  | -0.010<br>±0.025  | -0.008<br>±0.034  | -0.007<br>±0.019  | -0.005<br>±0.015  | 0.003<br>±0.022   | 0.007<br>±0.014   |
|               | BAcc     | -0.009<br>±0.032 | 0.003<br>±0.022  | 0.008<br>±0.032 | 0.004<br>±0.062  | -0.004<br>±0.033 | -0.009<br>±0.032 | -0.013<br>±0.033 | 0.010<br>±0.028  | 0.008<br>±0.025  | 0.010<br>±0.019 | 0.013<br>±0.031  | 0.004<br>±0.028  | 0.002<br>±0.031  | 0.015<br>±0.024  | -0.008<br>±0.023  | -0.003<br>±0.032  | -0.010<br>±0.021  | -0.011<br>±0.025  | 0.005<br>±0.020   | 0.004<br>±0.029   |
|               | Acc.1    | -0.009<br>±0.032 | 0.003<br>±0.022  | 0.008<br>±0.032 | 0.004<br>±0.062  | -0.003<br>±0.034 | -0.009<br>±0.032 | -0.014<br>±0.032 | 0.010<br>±0.029  | 0.007<br>±0.025  | 0.010<br>±0.019 | 0.013<br>±0.032  | 0.004<br>±0.028  | 0.002<br>±0.031  | 0.015<br>±0.023  | -0.008<br>±0.023  | -0.002<br>±0.032  | -0.010<br>±0.021  | -0.011<br>±0.026  | 0.008<br>±0.026   | 0.003<br>±0.029   |
|               | Acc.2    | 0.014<br>±0.032  | 0.007<br>±0.026  | 0.008<br>±0.033 | -0.010<br>±0.056 | -0.009<br>±0.053 | 0.012<br>±0.034  | 0.011<br>±0.040  | 0.001<br>±0.047  | 0.008<br>±0.040  | 0.010<br>±0.026 | -0.009<br>±0.034 | -0.000<br>±0.024 | 0.007<br>±0.046  | -0.002<br>±0.046 | -0.007<br>±0.038  | -0.004<br>±0.034  | -0.011<br>±0.057  | -0.012<br>±0.046  | 0.008<br>±0.028   | 0.013<br>±0.039   |
| sub9          | $\kappa$ | 0.034<br>±0.059  | 0.015<br>±0.048  | 0.006<br>±0.033 | 0.052<br>±0.063  | 0.024<br>±0.034  | -0.026<br>±0.043 | 0.013<br>±0.045  | 0.023<br>±0.046  | 0.017<br>±0.036  | 0.021<br>±0.019 | 0.007<br>±0.050  | 0.029<br>±0.039  | -0.013<br>±0.034 | 0.007<br>±0.047  | 0.000<br>±0.027   | -0.013<br>±0.032  | -0.022<br>±0.039  | 0.005<br>±0.057   | -0.008<br>±0.037  | -0.003<br>±0.037  |
|               | AUC      | 0.028<br>±0.036  | 0.021<br>±0.029  | 0.006<br>±0.021 | 0.043<br>±0.045  | 0.005<br>±0.029  | -0.022<br>±0.020 | 0.012<br>±0.020  | 0.002<br>±0.019  | 0.017<br>±0.021  | 0.014<br>±0.022 | 0.014<br>±0.026  | 0.028<br>±0.041  | -0.005<br>±0.026 | -0.000<br>±0.027 | 0.006<br>±0.011   | -0.009<br>±0.017  | 0.003<br>±0.019   | -0.009<br>±0.015  | -0.002<br>±0.021  | -0.014<br>±0.013  |

Continued on next page

| SubjectMetric | DeepConvnet | EEGNet | Conformer | CTNet  | BIOT (f) | BIOT (l) | BENDR (f) | BENDR (l) | CBraMod (f) | CBraMod (l) | EEGPT (f) | EEGPT (l) | LaBraM (f) | LaBraM (l) | STEGformer-s (j) | STEGformer-s (l) | STEGformer-b (f) | STEGformer-b (l) | STEGformer-l (j) | STEGformer-l (l) |
|---------------|-------------|--------|-----------|--------|----------|----------|-----------|-----------|-------------|-------------|-----------|-----------|------------|------------|------------------|------------------|------------------|------------------|------------------|------------------|
|               |             |        |           |        |          |          |           |           |             |             |           |           |            |            |                  |                  |                  |                  |                  |                  |
| BAcc          | 0.026       | 0.011  | 0.005     | 0.039  | 0.018    | -0.020   | 0.010     | 0.018     | 0.013       | 0.016       | 0.005     | 0.022     | -0.009     | 0.005      | 0.000            | -0.010           | -0.016           | 0.004            | -0.006           | -0.002           |
|               | ±0.044      | ±0.036 | ±0.025    | ±0.048 | ±0.026   | ±0.032   | ±0.034    | ±0.035    | ±0.027      | ±0.015      | ±0.037    | ±0.029    | ±0.026     | ±0.035     | ±0.020           | ±0.024           | ±0.029           | ±0.043           | ±0.028           | ±0.028           |
| Acc_1         | 0.026       | 0.011  | 0.005     | 0.039  | 0.018    | -0.020   | 0.010     | 0.018     | 0.014       | 0.015       | 0.005     | 0.022     | -0.010     | 0.007      | 0.000            | -0.010           | -0.017           | 0.003            | -0.003           | -0.003           |
|               | ±0.044      | ±0.036 | ±0.025    | ±0.048 | ±0.026   | ±0.032   | ±0.034    | ±0.034    | ±0.027      | ±0.015      | ±0.037    | ±0.029    | ±0.026     | ±0.035     | ±0.020           | ±0.024           | ±0.029           | ±0.041           | ±0.039           | ±0.028           |
| Acc_2         | 0.031       | 0.018  | 0.009     | 0.051  | 0.004    | -0.031   | 0.004     | 0.004     | 0.010       | 0.014       | 0.029     | 0.030     | -0.015     | -0.003     | 0.003            | -0.013           | -0.000           | -0.013           | -0.015           | -0.025           |
|               | ±0.033      | ±0.046 | ±0.040    | ±0.046 | ±0.035   | ±0.028   | ±0.025    | ±0.030    | ±0.036      | ±0.027      | ±0.041    | ±0.060    | ±0.030     | ±0.030     | ±0.031           | ±0.045           | ±0.029           | ±0.035           | ±0.055           | ±0.023           |

5133  
5134  
5135  
5136  
5137  
5138  
5139  
5140  
5141  
5142  
5143  
5144  
5145  
5146  
5147  
5148  
5149  
5150  
5151  
5152  
5153  
5154  
5155  
5156  
5157  
5158  
5159  
5160  
5161  
5162  
5163  
5164  
5165

## F BINOCULAR SSVEP: 40-CLASS BINOCULAR SSVEP TARGET CLASSIFICATION

### F.1 POPULATION-LEVEL RESULTS

#### F.1.1 SYNCHRONOUS DECODING RESULTS

Table 51: Average Performance Metrics Across All Subjects of Population-Trained Models

| Model (Training strategy) | $\kappa$                      | AUC                           | BAcc                          | Acc.1                         | Acc.2                         |
|---------------------------|-------------------------------|-------------------------------|-------------------------------|-------------------------------|-------------------------------|
| <b>DeepConvnet</b>        | 0.235<br>$\pm 0.162$<br>0.176 | 0.828<br>$\pm 0.115$<br>0.794 | 0.254<br>$\pm 0.158$<br>0.197 | 0.254<br>$\pm 0.158$<br>0.197 | 0.386<br>$\pm 0.208$<br>0.319 |
| <b>EEGNet</b>             | $\pm 0.129$<br>0.183          | $\pm 0.117$<br>0.800          | $\pm 0.126$<br>0.203          | $\pm 0.126$<br>0.203          | $\pm 0.177$<br>0.313          |
| <b>Conformer</b>          | $\pm 0.130$<br>0.264          | $\pm 0.105$<br>0.841          | $\pm 0.126$<br>0.283          | $\pm 0.126$<br>0.283          | $\pm 0.166$<br>0.433          |
| <b>CTNet</b>              | $\pm 0.167$<br>0.116          | $\pm 0.125$<br>0.711          | $\pm 0.163$<br>0.138          | $\pm 0.163$<br>0.138          | $\pm 0.219$<br>0.226          |
| <b>SSVEPDNN</b>           | $\pm 0.096$<br>0.259          | $\pm 0.096$<br>0.764          | $\pm 0.094$<br>0.278          | $\pm 0.094$<br>0.293          | $\pm 0.129$<br>0.414          |
| <b>BIOT (f)</b>           | $\pm 0.180$<br>0.183          | $\pm 0.118$<br>0.800          | $\pm 0.175$<br>0.204          | $\pm 0.184$<br>0.209          | $\pm 0.220$<br>0.347          |
| <b>BIOT (l)</b>           | $\pm 0.140$<br>0.264          | $\pm 0.125$<br>0.803          | $\pm 0.136$<br>0.282          | $\pm 0.139$<br>0.283          | $\pm 0.205$<br>0.403          |
| <b>BENDR (f)</b>          | $\pm 0.184$<br>0.015          | $\pm 0.132$<br>0.582          | $\pm 0.179$<br>0.040          | $\pm 0.182$<br>0.041          | $\pm 0.233$<br>0.077          |
| <b>BENDR (l)</b>          | $\pm 0.019$<br>0.062          | $\pm 0.066$<br>0.656          | $\pm 0.019$<br>0.085          | $\pm 0.021$<br>0.092          | $\pm 0.034$<br>0.168          |
| <b>CBraMod (f)</b>        | $\pm 0.032$<br>0.037          | $\pm 0.048$<br>0.686          | $\pm 0.031$<br>0.061          | $\pm 0.042$<br>0.081          | $\pm 0.062$<br>0.149          |
| <b>CBraMod (l)</b>        | $\pm 0.024$<br>0.102          | $\pm 0.059$<br>0.690          | $\pm 0.024$<br>0.125          | $\pm 0.035$<br>0.139          | $\pm 0.050$<br>0.215          |
| <b>EEGPT (f)</b>          | $\pm 0.095$<br>0.159          | $\pm 0.090$<br>0.791          | $\pm 0.093$<br>0.180          | $\pm 0.106$<br>0.196          | $\pm 0.132$<br>0.307          |
| <b>EEGPT (l)</b>          | $\pm 0.109$<br>0.337          | $\pm 0.098$<br>0.823          | $\pm 0.107$<br>0.354          | $\pm 0.118$<br>0.385          | $\pm 0.160$<br>0.518          |
| <b>LaBraM (f)</b>         | $\pm 0.182$<br>0.007          | $\pm 0.102$<br>0.537          | $\pm 0.177$<br>0.032          | $\pm 0.185$<br>0.030          | $\pm 0.211$<br>0.060          |
| <b>LaBraM (l)</b>         | $\pm 0.015$<br>0.312          | $\pm 0.027$<br>0.776          | $\pm 0.015$<br>0.329          | $\pm 0.016$<br>0.344          | $\pm 0.028$<br>0.466          |
| <b>STEEGformer-s (f)</b>  | $\pm 0.185$<br>0.015          | $\pm 0.116$<br>0.613          | $\pm 0.180$<br>0.039          | $\pm 0.180$<br>0.033          | $\pm 0.218$<br>0.066          |
| <b>STEEGformer-s (l)</b>  | $\pm 0.017$                   | $\pm 0.049$                   | $\pm 0.016$                   | $\pm 0.019$                   | $\pm 0.030$                   |
| <b>STEEGformer-b (f)</b>  | 0.441<br>$\pm 0.197$          | 0.885<br>$\pm 0.102$          | 0.455<br>$\pm 0.192$          | <b>0.464</b><br>$\pm 0.200$   | <b>0.597</b><br>$\pm 0.222$   |
| <b>STEEGformer-b (l)</b>  | 0.018<br>$\pm 0.016$          | 0.610<br>$\pm 0.053$          | 0.042<br>$\pm 0.016$          | 0.045<br>$\pm 0.025$          | 0.082<br>$\pm 0.035$          |
| <b>STEEGformer-l (f)</b>  | <b>0.438</b><br>$\pm 0.208$   | <b>0.864</b><br>$\pm 0.100$   | <b>0.452</b><br>$\pm 0.203$   | 0.472<br>$\pm 0.207$          | 0.610<br>$\pm 0.225$          |
| <b>STEEGformer-l (l)</b>  | 0.029<br>$\pm 0.023$          | 0.668<br>$\pm 0.062$          | 0.053<br>$\pm 0.022$          | 0.045<br>$\pm 0.023$          | 0.094<br>$\pm 0.043$          |

Table 52: Per-Subject Performance Metrics of Population-Trained Models

| Subject        | Metric   | DeepConvNet                   | EEGNet      | Conformer   | CTNet                         | SSVEPDNN    | BIOT (f)    | BIOT (l)    | BENDR (f)   | BENDR (l)   | CBraMod (f) | CBraMod (l)                   | EEGPT (f)   | EEGPT (l)   | LaBraM (f)  | LaBraM (l)  | STEEGformer-s (f)             | STEEGformer-s (l) | STEEGformer-h (f)             | STEEGformer-h (l) | STEEGformer-l (f)             | STEEGformer-l (l) |
|----------------|----------|-------------------------------|-------------|-------------|-------------------------------|-------------|-------------|-------------|-------------|-------------|-------------|-------------------------------|-------------|-------------|-------------|-------------|-------------------------------|-------------------|-------------------------------|-------------------|-------------------------------|-------------------|
| Subject10_sync | $\kappa$ | 0.031                         | 0.036       | 0.031       | 0.092                         | 0.041       | 0.062       | 0.021       | 0.021       | 0.021       | 0.031       | 0.046                         | 0.021       | 0.072       | 0.159       | 0.005       | 0.108                         | 0.026             | 0.308                         | 0.026             | <b>0.190</b>                  | 0.009             |
|                |          | $\pm 0.028$                   | $\pm 0.047$ | $\pm 0.021$ | $\pm 0.056$                   | $\pm 0.039$ | $\pm 0.047$ | $\pm 0.028$ | $\pm 0.011$ | $\pm 0.042$ | $\pm 0.021$ | $\pm 0.046$                   | $\pm 0.056$ | $\pm 0.069$ | $\pm 0.053$ | $\pm 0.021$ | $\pm 0.042$                   | $\pm 0.018$       | $\pm 0.031$                   | $\pm 0.026$       | $\pm 0.029$                   | $\pm 0.023$       |
|                | AUC      | 0.647                         | 0.632       | 0.634       | 0.675                         | 0.585       | 0.591       | 0.617       | 0.613       | 0.596       | 0.633       | 0.688                         | 0.604       | 0.679       | 0.739       | 0.560       | 0.644                         | 0.619             | 0.846                         | 0.630             | <b>0.749</b>                  | 0.611             |
|                |          | $\pm 0.054$                   | $\pm 0.049$ | $\pm 0.021$ | $\pm 0.030$                   | $\pm 0.061$ | $\pm 0.020$ | $\pm 0.055$ | $\pm 0.027$ | $\pm 0.016$ | $\pm 0.041$ | $\pm 0.025$                   | $\pm 0.048$ | $\pm 0.042$ | $\pm 0.024$ | $\pm 0.030$ | $\pm 0.037$                   | $\pm 0.040$       | $\pm 0.024$                   | $\pm 0.038$       | <b><math>\pm 0.028</math></b> | $\pm 0.027$       |
|                | BAcc     | 0.055                         | 0.060       | 0.055       | 0.115                         | 0.065       | 0.085       | 0.045       | 0.045       | 0.045       | 0.055       | 0.070                         | 0.045       | 0.095       | 0.180       | 0.030       | 0.130                         | 0.050             | 0.325                         | 0.050             | <b>0.210</b>                  | 0.005             |
|                |          | $\pm 0.027$                   | $\pm 0.045$ | $\pm 0.021$ | $\pm 0.055$                   | $\pm 0.038$ | $\pm 0.045$ | $\pm 0.027$ | $\pm 0.011$ | $\pm 0.041$ | $\pm 0.021$ | $\pm 0.045$                   | $\pm 0.054$ | $\pm 0.067$ | $\pm 0.051$ | $\pm 0.021$ | $\pm 0.041$                   | $\pm 0.018$       | $\pm 0.031$                   | $\pm 0.025$       | <b><math>\pm 0.029</math></b> | $\pm 0.022$       |
| Subject11_sync | Acc_1    | 0.055                         | 0.060       | 0.055       | 0.115                         | 0.065       | 0.091       | 0.047       | 0.028       | 0.037       | 0.081       | 0.081                         | 0.028       | 0.087       | 0.197       | 0.019       | 0.175                         | 0.031             | 0.297                         | 0.041             | <b>0.225</b>                  | 0.002             |
|                |          | $\pm 0.027$                   | $\pm 0.045$ | $\pm 0.021$ | $\pm 0.055$                   | $\pm 0.038$ | $\pm 0.046$ | $\pm 0.033$ | $\pm 0.007$ | $\pm 0.044$ | $\pm 0.045$ | $\pm 0.064$                   | $\pm 0.034$ | $\pm 0.055$ | $\pm 0.084$ | $\pm 0.013$ | $\pm 0.076$                   | $\pm 0.011$       | $\pm 0.047$                   | $\pm 0.032$       | <b><math>\pm 0.110</math></b> | $\pm 0.014$       |
|                | Acc_2    | 0.120                         | 0.115       | 0.115       | 0.175                         | 0.090       | 0.141       | 0.087       | 0.075       | 0.078       | 0.122       | 0.166                         | 0.113       | 0.131       | 0.269       | 0.050       | 0.259                         | 0.062             | 0.428                         | 0.053             | <b>0.341</b>                  | 0.003             |
|                |          | $\pm 0.065$                   | $\pm 0.055$ | $\pm 0.055$ | $\pm 0.059$                   | $\pm 0.045$ | $\pm 0.057$ | $\pm 0.067$ | $\pm 0.020$ | $\pm 0.046$ | $\pm 0.052$ | $\pm 0.089$                   | $\pm 0.084$ | $\pm 0.066$ | $\pm 0.047$ | $\pm 0.036$ | $\pm 0.075$                   | $\pm 0.019$       | $\pm 0.053$                   | $\pm 0.032$       | <b><math>\pm 0.145</math></b> | $\pm 0.009$       |
| Subject11_sync | $\kappa$ | 0.138                         | 0.067       | 0.062       | 0.108                         | 0.046       | 0.056       | 0.087       | 0.072       | 0.010       | 0.036       | 0.041                         | 0.010       | 0.051       | 0.097       | 0.005       | 0.087                         | 0.015             | <b>0.200</b>                  | -0.005            | 0.231                         | 0.005             |
|                |          | $\pm 0.039$                   | $\pm 0.029$ | $\pm 0.064$ | $\pm 0.058$                   | $\pm 0.066$ | $\pm 0.061$ | $\pm 0.014$ | $\pm 0.033$ | $\pm 0.014$ | $\pm 0.059$ | $\pm 0.029$                   | $\pm 0.029$ | $\pm 0.000$ | $\pm 0.049$ | $\pm 0.028$ | $\pm 0.053$                   | $\pm 0.039$       | <b><math>\pm 0.066</math></b> | $\pm 0.011$       | $\pm 0.018$                   | $\pm 0.023$       |
|                | AUC      | 0.748                         | 0.725       | 0.692       | <b>0.758</b>                  | 0.650       | 0.587       | 0.709       | 0.683       | 0.562       | 0.591       | 0.623                         | 0.563       | 0.670       | 0.658       | 0.538       | 0.606                         | 0.531             | 0.776                         | 0.519             | 0.747                         | 0.584             |
|                |          | $\pm 0.035$                   | $\pm 0.052$ | $\pm 0.035$ | <b><math>\pm 0.023</math></b> | $\pm 0.086$ | $\pm 0.047$ | $\pm 0.031$ | $\pm 0.052$ | $\pm 0.062$ | $\pm 0.064$ | $\pm 0.046$                   | $\pm 0.075$ | $\pm 0.044$ | $\pm 0.032$ | $\pm 0.035$ | $\pm 0.011$                   | $\pm 0.053$       | $\pm 0.043$                   | $\pm 0.064$       | $\pm 0.033$                   | $\pm 0.044$       |
|                | BAcc     | 0.160                         | 0.090       | 0.085       | 0.130                         | 0.070       | 0.080       | 0.110       | 0.095       | 0.035       | 0.060       | 0.065                         | 0.035       | 0.075       | 0.120       | 0.030       | 0.110                         | 0.040             | <b>0.220</b>                  | 0.020             | 0.250                         | 0.055             |
|                |          | $\pm 0.038$                   | $\pm 0.029$ | $\pm 0.063$ | $\pm 0.057$                   | $\pm 0.065$ | $\pm 0.060$ | $\pm 0.014$ | $\pm 0.033$ | $\pm 0.014$ | $\pm 0.058$ | $\pm 0.029$                   | $\pm 0.029$ | $\pm 0.000$ | $\pm 0.048$ | $\pm 0.027$ | $\pm 0.052$                   | $\pm 0.038$       | <b><math>\pm 0.065</math></b> | $\pm 0.011$       | $\pm 0.018$                   | $\pm 0.033$       |
| Subject12_sync | Acc_1    | <b>0.160</b>                  | 0.090       | 0.085       | 0.130                         | 0.070       | 0.087       | 0.134       | 0.087       | 0.031       | 0.037       | 0.097                         | 0.041       | 0.056       | 0.113       | 0.019       | 0.097                         | 0.025             | 0.231                         | 0.013             | 0.231                         | 0.053             |
|                |          | <b><math>\pm 0.038</math></b> | $\pm 0.029$ | $\pm 0.063$ | $\pm 0.057$                   | $\pm 0.065$ | $\pm 0.086$ | $\pm 0.028$ | $\pm 0.041$ | $\pm 0.027$ | $\pm 0.036$ | $\pm 0.068$                   | $\pm 0.057$ | $\pm 0.021$ | $\pm 0.052$ | $\pm 0.017$ | $\pm 0.036$                   | $\pm 0.024$       | $\pm 0.104$                   | $\pm 0.007$       | $\pm 0.020$                   | $\pm 0.036$       |
|                | Acc_2    | 0.250                         | 0.180       | 0.145       | 0.225                         | 0.105       | 0.194       | 0.231       | 0.166       | 0.053       | 0.072       | 0.141                         | 0.091       | 0.134       | 0.175       | 0.037       | 0.163                         | 0.034             | <b>0.353</b>                  | 0.034             | 0.366                         | 0.078             |
|                |          | $\pm 0.050$                   | $\pm 0.065$ | $\pm 0.060$ | $\pm 0.068$                   | $\pm 0.051$ | $\pm 0.105$ | $\pm 0.053$ | $\pm 0.057$ | $\pm 0.032$ | $\pm 0.045$ | $\pm 0.075$                   | $\pm 0.098$ | $\pm 0.057$ | $\pm 0.030$ | $\pm 0.009$ | $\pm 0.036$                   | $\pm 0.026$       | <b><math>\pm 0.146</math></b> | $\pm 0.034$       | $\pm 0.070$                   | $\pm 0.044$       |
| Subject12_sync | $\kappa$ | 0.015                         | 0.005       | 0.041       | 0.005                         | 0.000       | 0.021       | 0.010       | 0.026       | -0.010      | 0.021       | 0.015                         | 0.000       | 0.015       | 0.036       | 0.010       | <b>0.051</b>                  | 0.005             | 0.021                         | 0.010             | 0.103                         | 0.000             |
|                |          | $\pm 0.029$                   | $\pm 0.011$ | $\pm 0.039$ | $\pm 0.028$                   | $\pm 0.018$ | $\pm 0.021$ | $\pm 0.023$ | $\pm 0.060$ | $\pm 0.014$ | $\pm 0.021$ | $\pm 0.029$                   | $\pm 0.031$ | $\pm 0.029$ | $\pm 0.014$ | $\pm 0.023$ | <b><math>\pm 0.018</math></b> | $\pm 0.033$       | $\pm 0.042$                   | $\pm 0.034$       | $\pm 0.018$                   | $\pm 0.000$       |
|                | AUC      | 0.564                         | 0.548       | 0.611       | 0.591                         | 0.502       | 0.571       | 0.554       | 0.547       | 0.486       | 0.610       | 0.666                         | 0.577       | 0.610       | 0.604       | 0.500       | 0.573                         | 0.500             | 0.563                         | 0.498             | <b>0.646</b>                  | 0.532             |
|                |          | $\pm 0.033$                   | $\pm 0.045$ | $\pm 0.069$ | $\pm 0.063$                   | $\pm 0.052$ | $\pm 0.030$ | $\pm 0.031$ | $\pm 0.042$ | $\pm 0.033$ | $\pm 0.041$ | $\pm 0.031$                   | $\pm 0.046$ | $\pm 0.034$ | $\pm 0.037$ | $\pm 0.038$ | $\pm 0.020$                   | $\pm 0.035$       | $\pm 0.040$                   | $\pm 0.041$       | <b><math>\pm 0.037</math></b> | $\pm 0.019$       |
| Subject12_sync | BAcc     | 0.040                         | 0.030       | 0.065       | 0.030                         | 0.025       | 0.045       | 0.035       | 0.050       | 0.015       | 0.045       | 0.040                         | 0.025       | 0.040       | 0.060       | 0.035       | <b>0.075</b>                  | 0.030             | 0.045                         | 0.035             | 0.125                         | 0.025             |
|                |          | $\pm 0.029$                   | $\pm 0.011$ | $\pm 0.038$ | $\pm 0.027$                   | $\pm 0.018$ | $\pm 0.021$ | $\pm 0.022$ | $\pm 0.059$ | $\pm 0.014$ | $\pm 0.021$ | $\pm 0.029$                   | $\pm 0.031$ | $\pm 0.029$ | $\pm 0.014$ | $\pm 0.022$ | <b><math>\pm 0.018</math></b> | $\pm 0.033$       | $\pm 0.041$                   | $\pm 0.034$       | $\pm 0.018$                   | $\pm 0.000$       |
| Subject12_sync | Acc_1    | 0.040                         | 0.030       | 0.065       | 0.030                         | 0.025       | 0.056       | 0.022       | 0.050       | 0.019       | 0.056       | <b>0.072</b>                  | 0.016       | 0.044       | 0.056       | 0.022       | 0.066                         | 0.019             | 0.056                         | 0.022             | 0.106                         | 0.016             |
|                |          | $\pm 0.029$                   | $\pm 0.011$ | $\pm 0.038$ | $\pm 0.027$                   | $\pm 0.018$ | $\pm 0.050$ | $\pm 0.014$ | $\pm 0.059$ | $\pm 0.026$ | $\pm 0.032$ | <b><math>\pm 0.063</math></b> | $\pm 0.019$ | $\pm 0.036$ | $\pm 0.028$ | $\pm 0.014$ | $\pm 0.028$                   | $\pm 0.020$       | $\pm 0.067$                   | $\pm 0.021$       | $\pm 0.043$                   | $\pm 0.000$       |

Continued on next page

Under review as a conference paper at ICLR 2025

| Subject        | Metric         | DeepConvnet     | EEGNet          | Conformer       | CTNet           | SSVEPDNN        | BIOT (f)        | BIOT (l)        | BENDR (f)       | BENDR (l)       | CBraMod (f)     | CBraMod (l)      | EEGPT (f)        | EEGPT (l)       | LaBraM (f)                     | LaBraM (l)       | STEEGformer-s (f) | STEEGformer-s (l) | STEEGformer-b (f)              | STEEGformer-b (l)              | STEEGformer-l (f)              | STEEGformer-l (l) |
|----------------|----------------|-----------------|-----------------|-----------------|-----------------|-----------------|-----------------|-----------------|-----------------|-----------------|-----------------|------------------|------------------|-----------------|--------------------------------|------------------|-------------------|-------------------|--------------------------------|--------------------------------|--------------------------------|-------------------|
| Subject13_sync | Acc.2          | 0.065<br>±0.042 | 0.060<br>±0.022 | 0.090<br>±0.038 | 0.070<br>±0.037 | 0.050<br>±0.018 | 0.097<br>±0.037 | 0.044<br>±0.034 | 0.084<br>±0.075 | 0.041<br>±0.021 | 0.078<br>±0.031 | 0.109<br>±0.069  | 0.062<br>±0.063  | 0.069<br>±0.024 | <b>0.119</b><br>± <b>0.036</b> | 0.031<br>±0.016  | 0.078<br>±0.029   | 0.034<br>±0.013   | 0.078<br>±0.062                | 0.034<br>±0.026                | 0.128<br>± 0.053               | 0.051<br>±0.030   |
|                | κ              | 0.323<br>±0.047 | 0.215<br>±0.067 | 0.267<br>±0.047 | 0.359<br>±0.096 | 0.113<br>±0.078 | 0.287<br>±0.080 | 0.159<br>±0.021 | 0.364<br>±0.011 | 0.015<br>±0.047 | 0.051<br>±0.048 | -0.000<br>±0.018 | 0.221<br>±0.148  | 0.231<br>±0.041 | 0.456<br>±0.071                | -0.010<br>±0.023 | 0.410<br>±0.094   | 0.015<br>±0.023   | 0.595<br>± 0.098               | 0.010<br>±0.014                | <b>0.585</b><br>± <b>0.091</b> | 0.051<br>±0.037   |
|                | AUC            | 0.890<br>±0.039 | 0.853<br>±0.032 | 0.829<br>±0.045 | 0.904<br>±0.035 | 0.722<br>±0.129 | 0.812<br>±0.063 | 0.836<br>±0.015 | 0.920<br>±0.026 | 0.598<br>±0.048 | 0.690<br>±0.030 | 0.536<br>±0.030  | 0.806<br>±0.031  | 0.898<br>±0.018 | 0.896<br>±0.038                | 0.495<br>±0.046  | 0.855<br>±0.054   | 0.636<br>±0.036   | 0.958<br>± 0.029               | 0.656<br>±0.031                | <b>0.939</b><br>± <b>0.032</b> | 0.779<br>±0.034   |
|                | BAcc           | 0.340<br>±0.045 | 0.235<br>±0.065 | 0.285<br>±0.045 | 0.375<br>±0.094 | 0.135<br>±0.076 | 0.305<br>±0.078 | 0.180<br>±0.021 | 0.380<br>±0.011 | 0.040<br>±0.045 | 0.075<br>±0.047 | 0.025<br>±0.018  | 0.240<br>±0.144  | 0.250<br>±0.040 | 0.470<br>±0.069                | 0.015<br>±0.022  | 0.425<br>±0.092   | 0.040<br>±0.022   | 0.605<br>± 0.096               | 0.035<br>±0.014                | <b>0.595</b><br>± <b>0.089</b> | 0.051<br>±0.036   |
|                | Acc.1          | 0.340<br>±0.045 | 0.235<br>±0.065 | 0.285<br>±0.045 | 0.375<br>±0.094 | 0.135<br>±0.076 | 0.350<br>±0.089 | 0.206<br>±0.040 | 0.359<br>±0.029 | 0.053<br>±0.051 | 0.094<br>±0.055 | 0.044<br>±0.034  | 0.253<br>±0.193  | 0.287<br>±0.060 | 0.537<br>±0.132                | 0.019<br>±0.034  | 0.425<br>±0.145   | 0.034<br>±0.034   | <b>0.575</b><br>± <b>0.135</b> | 0.059<br>±0.046                | 0.606<br>± 0.070               | 0.055<br>±0.038   |
|                | Acc.2          | 0.455<br>±0.076 | 0.390<br>±0.072 | 0.395<br>±0.054 | 0.520<br>±0.067 | 0.240<br>±0.123 | 0.534<br>±0.128 | 0.359<br>±0.083 | 0.534<br>±0.050 | 0.094<br>±0.068 | 0.159<br>±0.079 | 0.081<br>±0.053  | 0.422<br>±0.178  | 0.500<br>±0.080 | 0.672<br>±0.155                | 0.094<br>±0.065  | 0.594<br>±0.120   | 0.097<br>±0.059   | 0.794<br>± 0.097               | 0.087<br>±0.030                | <b>0.753</b><br>± <b>0.100</b> | 0.151<br>±0.039   |
|                | Subject14_sync | κ               | 0.333<br>±0.070 | 0.179<br>±0.065 | 0.241<br>±0.076 | 0.349<br>±0.064 | 0.062<br>±0.039 | 0.415<br>±0.061 | 0.303<br>±0.046 | 0.369<br>±0.092 | 0.010<br>±0.023 | 0.067<br>±0.056  | 0.046<br>±0.046  | 0.118<br>±0.062 | 0.174<br>±0.061                | 0.590<br>±0.065  | 0.015<br>±0.014   | 0.554<br>±0.090   | 0.005<br>±0.021                | <b>0.713</b><br>± <b>0.112</b> | 0.021<br>±0.042                | 0.718<br>± 0.060  |
| AUC            |                | 0.904<br>±0.014 | 0.853<br>±0.036 | 0.872<br>±0.015 | 0.925<br>±0.025 | 0.726<br>±0.127 | 0.883<br>±0.018 | 0.906<br>±0.018 | 0.921<br>±0.022 | 0.514<br>±0.056 | 0.695<br>±0.071 | 0.741<br>±0.044  | 0.773<br>±0.031  | 0.849<br>±0.023 | 0.955<br>±0.017                | 0.577<br>±0.024  | 0.917<br>±0.029   | 0.665<br>±0.050   | 0.978<br>± 0.013               | 0.668<br>±0.036                | <b>0.968</b><br>± <b>0.006</b> | 0.778<br>±0.035   |
| BAcc           |                | 0.350<br>±0.068 | 0.200<br>±0.064 | 0.260<br>±0.074 | 0.365<br>±0.063 | 0.085<br>±0.038 | 0.430<br>±0.060 | 0.320<br>±0.045 | 0.385<br>±0.089 | 0.035<br>±0.022 | 0.090<br>±0.055 | 0.070<br>±0.045  | 0.140<br>±0.060  | 0.195<br>±0.060 | 0.600<br>±0.064                | 0.040<br>±0.014  | 0.565<br>±0.088   | 0.030<br>±0.021   | <b>0.720</b><br>± <b>0.110</b> | 0.045<br>±0.041                | 0.725<br>± 0.059               | 0.090<br>±0.045   |
| Acc.1          |                | 0.350<br>±0.068 | 0.200<br>±0.064 | 0.260<br>±0.074 | 0.365<br>±0.063 | 0.085<br>±0.038 | 0.391<br>±0.074 | 0.275<br>±0.014 | 0.334<br>±0.119 | 0.059<br>±0.051 | 0.075<br>±0.053 | 0.094<br>±0.068  | 0.144<br>±0.062  | 0.178<br>±0.058 | 0.609<br>±0.072                | 0.025<br>±0.009  | 0.569<br>±0.127   | 0.019<br>±0.013   | <b>0.759</b><br>± <b>0.118</b> | 0.037<br>±0.039                | 0.772<br>± 0.083               | 0.056<br>±0.028   |
| Acc.2          |                | 0.530<br>±0.057 | 0.360<br>±0.065 | 0.440<br>±0.108 | 0.585<br>±0.045 | 0.175<br>±0.081 | 0.525<br>±0.059 | 0.431<br>±0.045 | 0.547<br>±0.092 | 0.066<br>±0.046 | 0.134<br>±0.045 | 0.169<br>±0.089  | 0.259<br>±0.080  | 0.325<br>±0.060 | 0.766<br>±0.099                | 0.044<br>±0.020  | 0.747<br>±0.089   | 0.044<br>±0.020   | <b>0.878</b><br>± <b>0.051</b> | 0.066<br>±0.045                | 0.903<br>± 0.051               | 0.156<br>±0.048   |
| Subject15_sync |                | κ               | 0.210<br>±0.076 | 0.159<br>±0.028 | 0.138<br>±0.043 | 0.246<br>±0.047 | 0.138<br>±0.114 | 0.282<br>±0.091 | 0.190<br>±0.086 | 0.236<br>±0.078 | 0.005<br>±0.028 | 0.026<br>±0.051  | -0.000<br>±0.000 | 0.077<br>±0.031 | 0.144<br>±0.076                | 0.226<br>±0.100  | -0.005<br>±0.021  | 0.221<br>±0.074   | 0.005<br>±0.011                | <b>0.364</b><br>± <b>0.117</b> | 0.015<br>±0.023                | 0.374<br>± 0.136  |
|                | AUC            | 0.820<br>±0.069 | 0.799<br>±0.059 | 0.760<br>±0.059 | 0.848<br>±0.057 | 0.719<br>±0.146 | 0.777<br>±0.021 | 0.841<br>±0.058 | 0.814<br>±0.064 | 0.545<br>±0.055 | 0.568<br>±0.052 | 0.623<br>±0.040  | 0.687<br>±0.044  | 0.775<br>±0.049 | 0.795<br>±0.058                | 0.529<br>±0.091  | 0.742<br>±0.075   | 0.565<br>±0.038   | 0.890<br>± 0.050               | 0.584<br>±0.013                | <b>0.874</b><br>± <b>0.059</b> | 0.645<br>±0.042   |
|                | BAcc           | 0.230<br>±0.074 | 0.180<br>±0.027 | 0.160<br>±0.042 | 0.265<br>±0.045 | 0.160<br>±0.111 | 0.300<br>±0.088 | 0.210<br>±0.084 | 0.255<br>±0.076 | 0.030<br>±0.027 | 0.050<br>±0.050 | 0.025<br>±0.000  | 0.100<br>±0.031  | 0.165<br>±0.074 | 0.245<br>±0.097                | 0.020<br>±0.021  | 0.240<br>±0.072   | 0.030<br>±0.011   | <b>0.380</b><br>± <b>0.114</b> | 0.040<br>±0.022                | 0.390<br>± 0.133               | 0.035<br>±0.042   |
|                | Acc.1          | 0.230<br>±0.074 | 0.180<br>±0.027 | 0.160<br>±0.042 | 0.265<br>±0.045 | 0.160<br>±0.111 | 0.309<br>±0.120 | 0.225<br>±0.078 | 0.291<br>±0.125 | 0.037<br>±0.028 | 0.041<br>±0.046 | 0.053<br>±0.021  | 0.100<br>±0.028  | 0.178<br>±0.097 | 0.331<br>±0.179                | 0.013<br>±0.013  | 0.319<br>±0.075   | 0.037<br>±0.030   | 0.434<br>± 0.091               | 0.034<br>±0.028                | <b>0.422</b><br>± <b>0.093</b> | 0.034<br>±0.045   |

Continued on next page

5253  
5254  
5255  
5256  
5257  
5258  
5259  
5260  
5261  
5262  
5263  
5264  
5265  
5266  
5267  
5268  
5269  
5270  
5271  
5272  
5273  
5274  
5275  
5276  
5277  
5278  
5279  
5280  
5281  
5282  
5283  
5284  
5285

| Subject        | Metric         | DeepConvnet     | EEGNet          | Conformer       | CTNet            | SSVEPDNN        | BIOT (f)        | BIOT (f)        | BENDR (f)       | BENDR (f)       | CBraMod (f)      | CBraMod (f)     | EEGPT (f)       | EEGPT (f)       | LaBraM (f)       | LaBraM (f)      | STEEGformer-s (f) | STEEGformer-s (f) | STEEGformer-b (f) | STEEGformer-b (f) | STEEGformer-l (f) | Under Review     |
|----------------|----------------|-----------------|-----------------|-----------------|------------------|-----------------|-----------------|-----------------|-----------------|-----------------|------------------|-----------------|-----------------|-----------------|------------------|-----------------|-------------------|-------------------|-------------------|-------------------|-------------------|------------------|
| Subject16_sync | Acc.2          | 0.375<br>±0.151 | 0.305<br>±0.067 | 0.310<br>±0.108 | 0.445<br>±0.150  | 0.245<br>±0.176 | 0.419<br>±0.131 | 0.362<br>±0.069 | 0.447<br>±0.184 | 0.109<br>±0.072 | 0.097<br>±0.049  | 0.109<br>±0.072 | 0.172<br>±0.082 | 0.259<br>±0.093 | 0.541<br>±0.150  | 0.031<br>±0.025 | 0.419<br>±0.120   | 0.066<br>±0.030   | 0.625<br>± 0.096  | 0.059<br>±0.030   | 0.591<br>± 0.074  | 0.033<br>±0.046  |
|                | κ              | 0.221<br>±0.050 | 0.159<br>±0.071 | 0.128<br>±0.081 | 0.262<br>±0.046  | 0.118<br>±0.100 | 0.246<br>±0.047 | 0.179<br>±0.085 | 0.277<br>±0.139 | 0.015<br>±0.014 | 0.026<br>±0.044  | 0.062<br>±0.023 | 0.072<br>±0.056 | 0.133<br>±0.064 | 0.369<br>±0.053  | 0.005<br>±0.011 | 0.349<br>±0.125   | -0.015<br>±0.023  | 0.477<br>± 0.135  | -0.010<br>±0.023  | 0.482<br>± 0.066  | 0.003<br>±0.034  |
|                | AUC            | 0.848<br>±0.046 | 0.803<br>±0.070 | 0.767<br>±0.021 | 0.878<br>±0.031  | 0.722<br>±0.137 | 0.795<br>±0.038 | 0.840<br>±0.042 | 0.854<br>±0.053 | 0.547<br>±0.051 | 0.643<br>±0.016  | 0.697<br>±0.038 | 0.672<br>±0.053 | 0.772<br>±0.053 | 0.868<br>±0.021  | 0.537<br>±0.043 | 0.821<br>±0.038   | 0.587<br>±0.063   | 0.951<br>± 0.025  | 0.567<br>±0.072   | 0.926<br>± 0.016  | 0.656<br>±0.030  |
|                | BAcc           | 0.240<br>±0.049 | 0.180<br>±0.069 | 0.150<br>±0.079 | 0.280<br>±0.045  | 0.140<br>±0.098 | 0.265<br>±0.045 | 0.200<br>±0.083 | 0.295<br>±0.135 | 0.040<br>±0.014 | 0.050<br>±0.043  | 0.085<br>±0.022 | 0.095<br>±0.054 | 0.155<br>±0.062 | 0.385<br>±0.052  | 0.030<br>±0.011 | 0.365<br>±0.122   | 0.010<br>±0.022   | 0.490<br>± 0.132  | 0.015<br>±0.022   | 0.495<br>± 0.065  | 0.003<br>±0.034  |
|                | Acc.1          | 0.240<br>±0.049 | 0.180<br>±0.069 | 0.150<br>±0.079 | 0.280<br>±0.045  | 0.140<br>±0.098 | 0.231<br>±0.042 | 0.209<br>±0.089 | 0.297<br>±0.179 | 0.053<br>±0.028 | 0.041<br>±0.048  | 0.100<br>±0.036 | 0.097<br>±0.079 | 0.144<br>±0.079 | 0.391<br>±0.071  | 0.019<br>±0.007 | 0.359<br>±0.145   | 0.006<br>±0.014   | 0.494<br>± 0.112  | 0.009<br>±0.014   | 0.459<br>± 0.054  | 0.004<br>±0.037  |
|                | Acc.2          | 0.380<br>±0.057 | 0.305<br>±0.091 | 0.225<br>±0.059 | 0.420<br>±0.076  | 0.230<br>±0.134 | 0.400<br>±0.090 | 0.316<br>±0.095 | 0.428<br>±0.201 | 0.100<br>±0.070 | 0.159<br>±0.060  | 0.219<br>±0.089 | 0.141<br>±0.077 | 0.219<br>±0.082 | 0.569<br>±0.086  | 0.037<br>±0.009 | 0.525<br>±0.111   | 0.047<br>±0.046   | 0.691<br>± 0.091  | 0.034<br>±0.023   | 0.734<br>± 0.067  | 0.013<br>±0.037  |
|                | Subject17_sync | κ               | 0.390<br>±0.066 | 0.344<br>±0.084 | 0.246<br>±0.092  | 0.400<br>±0.076 | 0.205<br>±0.132 | 0.421<br>±0.082 | 0.313<br>±0.049 | 0.410<br>±0.110 | 0.031<br>±0.021  | 0.046<br>±0.046 | 0.010<br>±0.023 | 0.082<br>±0.038 | 0.144<br>±0.072  | 0.415<br>±0.069 | 0.015<br>±0.014   | 0.400<br>±0.088   | 0.031<br>±0.021   | 0.615<br>± 0.124  | 0.036<br>±0.029   | 0.626<br>± 0.131 |
| AUC            |                | 0.939<br>±0.028 | 0.910<br>±0.030 | 0.879<br>±0.050 | 0.933<br>±0.028  | 0.818<br>±0.179 | 0.888<br>±0.047 | 0.917<br>±0.017 | 0.904<br>±0.025 | 0.629<br>±0.044 | 0.584<br>±0.059  | 0.687<br>±0.019 | 0.725<br>±0.042 | 0.860<br>±0.023 | 0.901<br>±0.036  | 0.507<br>±0.032 | 0.850<br>±0.041   | 0.587<br>±0.030   | 0.960<br>± 0.033  | 0.624<br>±0.012   | 0.954<br>± 0.021  | 0.657<br>±0.051  |
| BAcc           |                | 0.405<br>±0.065 | 0.360<br>±0.082 | 0.265<br>±0.089 | 0.415<br>±0.074  | 0.225<br>±0.129 | 0.435<br>±0.080 | 0.330<br>±0.048 | 0.425<br>±0.108 | 0.055<br>±0.021 | 0.070<br>±0.045  | 0.035<br>±0.022 | 0.105<br>±0.037 | 0.165<br>±0.070 | 0.430<br>±0.067  | 0.040<br>±0.014 | 0.415<br>±0.086   | 0.055<br>±0.021   | 0.625<br>± 0.121  | 0.060<br>±0.029   | 0.635<br>± 0.128  | 0.060<br>±0.038  |
| Acc.1          |                | 0.405<br>±0.065 | 0.360<br>±0.082 | 0.265<br>±0.089 | 0.415<br>±0.074  | 0.225<br>±0.129 | 0.487<br>±0.073 | 0.375<br>±0.101 | 0.434<br>±0.134 | 0.062<br>±0.049 | 0.081<br>±0.072  | 0.044<br>±0.036 | 0.103<br>±0.054 | 0.178<br>±0.090 | 0.428<br>±0.072  | 0.044<br>±0.046 | 0.466<br>±0.151   | 0.062<br>±0.037   | 0.662<br>± 0.125  | 0.047<br>±0.031   | 0.678<br>± 0.144  | 0.066<br>±0.061  |
| Acc.2          |                | 0.585<br>±0.029 | 0.490<br>±0.121 | 0.440<br>±0.113 | 0.610<br>±0.049  | 0.345<br>±0.185 | 0.622<br>±0.087 | 0.509<br>±0.103 | 0.625<br>±0.085 | 0.087<br>±0.060 | 0.113<br>±0.062  | 0.094<br>±0.046 | 0.188<br>±0.108 | 0.366<br>±0.102 | 0.650<br>±0.085  | 0.094<br>±0.107 | 0.637<br>±0.107   | 0.091<br>±0.057   | 0.803<br>± 0.089  | 0.091<br>±0.064   | 0.791<br>± 0.103  | 0.147<br>±0.083  |
| Subject18_sync |                | κ               | 0.287<br>±0.066 | 0.236<br>±0.066 | 0.236<br>±0.093  | 0.400<br>±0.047 | 0.123<br>±0.108 | 0.451<br>±0.080 | 0.349<br>±0.104 | 0.390<br>±0.117 | -0.010<br>±0.023 | 0.041<br>±0.047 | 0.067<br>±0.029 | 0.062<br>±0.029 | 0.138<br>±0.086  | 0.595<br>±0.130 | 0.010<br>±0.029   | 0.533<br>±0.073   | 0.015<br>±0.029   | 0.610<br>± 0.069  | 0.015<br>±0.014   | 0.662<br>± 0.084 |
|                | AUC            | 0.897<br>±0.023 | 0.846<br>±0.054 | 0.871<br>±0.019 | 0.954<br>± 0.004 | 0.766<br>±0.152 | 0.922<br>±0.018 | 0.941<br>±0.019 | 0.897<br>±0.033 | 0.552<br>±0.048 | 0.687<br>±0.062  | 0.708<br>±0.044 | 0.667<br>±0.048 | 0.800<br>±0.030 | 0.939<br>±0.022  | 0.564<br>±0.037 | 0.914<br>±0.050   | 0.634<br>±0.045   | 0.950<br>±0.011   | 0.639<br>±0.051   | 0.957<br>± 0.025  | 0.710<br>±0.037  |
|                | BAcc           | 0.305<br>±0.065 | 0.255<br>±0.065 | 0.255<br>±0.091 | 0.415<br>±0.045  | 0.145<br>±0.105 | 0.465<br>±0.078 | 0.365<br>±0.101 | 0.405<br>±0.114 | 0.015<br>±0.022 | 0.065<br>±0.045  | 0.090<br>±0.029 | 0.085<br>±0.029 | 0.160<br>±0.084 | 0.605<br>±0.127  | 0.035<br>±0.029 | 0.545<br>±0.072   | 0.040<br>±0.029   | 0.620<br>± 0.067  | 0.040<br>±0.014   | 0.670<br>± 0.082  | 0.060<br>±0.022  |
|                | Acc.1          | 0.305<br>±0.065 | 0.255<br>±0.065 | 0.255<br>±0.091 | 0.415<br>±0.045  | 0.145<br>±0.105 | 0.506<br>±0.089 | 0.312<br>±0.101 | 0.431<br>±0.130 | 0.009<br>±0.014 | 0.050<br>±0.046  | 0.122<br>±0.068 | 0.119<br>±0.026 | 0.166<br>±0.104 | 0.631<br>± 0.129 | 0.022<br>±0.018 | 0.556<br>±0.101   | 0.025<br>±0.018   | 0.631<br>± 0.061  | 0.025<br>±0.009   | 0.709<br>± 0.082  | 0.037<br>±0.014  |

Continued on next page

5286  
5287  
5288  
5289  
5290  
5291  
5292  
5293  
5294  
5295  
5296  
5297  
5298  
5299  
5300  
5301  
5302  
5303  
5304  
5305  
5306  
5307  
5308  
5309  
5310  
5311  
5312  
5313  
5314  
5315  
5316  
5317  
5318

| Subject        | Metric   | DeepConvnet     | EEGNet          | Conformer       | CTNet                          | SSVEPDNN        | BIOT (f)        | BIOT (l)        | BENDR (f)       | BENDR (l)        | CBraMod (f)     | CBraMod (l)     | EEGPT (f)       | EEGPT (l)       | LaBraM (f)                     | LaBraM (l)       | STEGformer-s (f) | STEGformer-s (l) | STEGformer-h (f)               | STEGformer-h (l) | STEGformer-l (f)               | Under Review    |
|----------------|----------|-----------------|-----------------|-----------------|--------------------------------|-----------------|-----------------|-----------------|-----------------|------------------|-----------------|-----------------|-----------------|-----------------|--------------------------------|------------------|------------------|------------------|--------------------------------|------------------|--------------------------------|-----------------|
| Subject19_sync | Acc_2    | 0.475<br>±0.068 | 0.395<br>±0.110 | 0.395<br>±0.037 | 0.630<br>±0.074                | 0.270<br>±0.158 | 0.716<br>±0.100 | 0.575<br>±0.081 | 0.572<br>±0.158 | 0.044<br>±0.020  | 0.153<br>±0.047 | 0.178<br>±0.067 | 0.172<br>±0.071 | 0.228<br>±0.098 | <b>0.784</b><br>± <b>0.052</b> | 0.031<br>±0.019  | 0.716<br>±0.082  | 0.044<br>±0.023  | 0.747<br>±0.092                | 0.053<br>±0.050  | 0.828<br>± 0.072               | 0.055<br>±0.033 |
|                | $\kappa$ | 0.144<br>±0.047 | 0.138<br>±0.062 | 0.103<br>±0.026 | 0.246<br>±0.113                | 0.067<br>±0.043 | 0.185<br>±0.069 | 0.138<br>±0.047 | 0.174<br>±0.069 | 0.010<br>±0.043  | 0.092<br>±0.059 | 0.021<br>±0.021 | 0.082<br>±0.033 | 0.133<br>±0.058 | 0.236<br>±0.056                | -0.015<br>±0.014 | 0.236<br>±0.056  | 0.010<br>±0.023  | 0.467<br>± 0.053               | 0.015<br>±0.023  | <b>0.421</b><br>± <b>0.047</b> | 0.055<br>±0.041 |
|                | AUC      | 0.864<br>±0.031 | 0.809<br>±0.020 | 0.811<br>±0.057 | <b>0.884</b><br>± <b>0.033</b> | 0.712<br>±0.123 | 0.732<br>±0.027 | 0.752<br>±0.026 | 0.777<br>±0.034 | 0.662<br>±0.066  | 0.738<br>±0.041 | 0.785<br>±0.008 | 0.701<br>±0.046 | 0.833<br>±0.014 | 0.817<br>±0.036                | 0.520<br>±0.056  | 0.764<br>±0.034  | 0.667<br>±0.036  | 0.927<br>± 0.008               | 0.643<br>±0.077  | 0.869<br>±0.028                | 0.622<br>±0.037 |
|                | BAcc     | 0.165<br>±0.045 | 0.160<br>±0.060 | 0.125<br>±0.025 | 0.265<br>±0.110                | 0.090<br>±0.042 | 0.205<br>±0.067 | 0.160<br>±0.045 | 0.195<br>±0.067 | 0.035<br>±0.042  | 0.115<br>±0.058 | 0.045<br>±0.021 | 0.105<br>±0.033 | 0.155<br>±0.057 | 0.255<br>±0.054                | 0.010<br>±0.014  | 0.255<br>±0.054  | 0.035<br>±0.022  | 0.480<br>± 0.051               | 0.040<br>±0.022  | <b>0.435</b><br>± <b>0.045</b> | 0.050<br>±0.040 |
|                | Acc_1    | 0.165<br>±0.045 | 0.160<br>±0.060 | 0.125<br>±0.025 | 0.265<br>±0.110                | 0.090<br>±0.042 | 0.212<br>±0.067 | 0.166<br>±0.048 | 0.225<br>±0.098 | 0.050<br>±0.087  | 0.109<br>±0.070 | 0.066<br>±0.049 | 0.131<br>±0.089 | 0.200<br>±0.093 | 0.234<br>±0.067                | 0.006<br>±0.009  | 0.253<br>±0.058  | 0.022<br>±0.014  | 0.544<br>± 0.083               | 0.025<br>±0.014  | <b>0.478</b><br>± <b>0.067</b> | 0.051<br>±0.038 |
|                | Acc_2    | 0.300<br>±0.043 | 0.280<br>±0.048 | 0.245<br>±0.072 | 0.410<br>±0.091                | 0.165<br>±0.088 | 0.300<br>±0.062 | 0.284<br>±0.061 | 0.287<br>±0.078 | 0.100<br>±0.086  | 0.234<br>±0.101 | 0.169<br>±0.042 | 0.203<br>±0.077 | 0.294<br>±0.078 | 0.425<br>±0.066                | 0.031<br>±0.040  | 0.394<br>±0.026  | 0.044<br>±0.013  | 0.650<br>± 0.082               | 0.078<br>±0.051  | <b>0.575</b><br>± <b>0.081</b> | 0.053<br>±0.046 |
|                | $\kappa$ | 0.108<br>±0.046 | 0.092<br>±0.050 | 0.108<br>±0.056 | 0.221<br>±0.069                | 0.087<br>±0.062 | 0.118<br>±0.072 | 0.103<br>±0.075 | 0.154<br>±0.091 | -0.005<br>±0.021 | 0.036<br>±0.029 | 0.010<br>±0.014 | 0.036<br>±0.034 | 0.077<br>±0.063 | 0.308<br>±0.054                | 0.005<br>±0.011  | 0.292<br>±0.067  | 0.000<br>±0.026  | 0.426<br>± 0.072               | 0.005<br>±0.011  | <b>0.390</b><br>± <b>0.061</b> | 0.051<br>±0.021 |
|                | AUC      | 0.809<br>±0.046 | 0.736<br>±0.034 | 0.764<br>±0.042 | 0.849<br>±0.038                | 0.666<br>±0.096 | 0.675<br>±0.066 | 0.754<br>±0.028 | 0.739<br>±0.067 | 0.530<br>±0.039  | 0.570<br>±0.037 | 0.627<br>±0.059 | 0.568<br>±0.037 | 0.677<br>±0.035 | 0.811<br>±0.024                | 0.524<br>±0.044  | 0.740<br>±0.025  | 0.563<br>±0.027  | 0.904<br>± 0.019               | 0.550<br>±0.037  | <b>0.854</b><br>± <b>0.038</b> | 0.622<br>±0.057 |
|                | BAcc     | 0.130<br>±0.045 | 0.115<br>±0.049 | 0.130<br>±0.054 | 0.240<br>±0.068                | 0.110<br>±0.060 | 0.140<br>±0.070 | 0.125<br>±0.073 | 0.175<br>±0.088 | 0.020<br>±0.021  | 0.060<br>±0.029 | 0.035<br>±0.014 | 0.060<br>±0.034 | 0.100<br>±0.061 | 0.325<br>±0.053                | 0.030<br>±0.011  | 0.310<br>±0.065  | 0.025<br>±0.025  | 0.440<br>± 0.070               | 0.030<br>±0.011  | <b>0.405</b><br>± <b>0.060</b> | 0.045<br>±0.021 |
|                | Acc_1    | 0.130<br>±0.045 | 0.115<br>±0.049 | 0.130<br>±0.054 | 0.240<br>±0.068                | 0.110<br>±0.060 | 0.144<br>±0.078 | 0.116<br>±0.099 | 0.147<br>±0.091 | 0.013<br>±0.013  | 0.047<br>±0.037 | 0.022<br>±0.009 | 0.056<br>±0.044 | 0.119<br>±0.098 | 0.353<br>±0.082                | 0.028<br>±0.020  | 0.259<br>±0.087  | 0.025<br>±0.026  | <b>0.388</b><br>± <b>0.093</b> | 0.028<br>±0.028  | 0.394<br>± 0.118               | 0.028<br>±0.013 |
|                | Acc_2    | 0.290<br>±0.095 | 0.190<br>±0.058 | 0.220<br>±0.067 | 0.400<br>±0.064                | 0.165<br>±0.074 | 0.231<br>±0.097 | 0.231<br>±0.088 | 0.216<br>±0.107 | 0.031<br>±0.037  | 0.081<br>±0.032 | 0.072<br>±0.036 | 0.094<br>±0.031 | 0.166<br>±0.096 | 0.453<br>±0.155                | 0.050<br>±0.028  | 0.331<br>±0.052  | 0.044<br>±0.026  | 0.569<br>± 0.101               | 0.062<br>±0.038  | <b>0.547</b><br>± <b>0.116</b> | 0.059<br>±0.034 |
| Subject20_sync | $\kappa$ | 0.221<br>±0.053 | 0.195<br>±0.080 | 0.190<br>±0.043 | 0.359<br>±0.070                | 0.138<br>±0.086 | 0.333<br>±0.089 | 0.328<br>±0.078 | 0.297<br>±0.092 | 0.036<br>±0.050  | 0.087<br>±0.029 | 0.067<br>±0.029 | 0.113<br>±0.034 | 0.251<br>±0.082 | 0.503<br>±0.108                | -0.010<br>±0.014 | 0.467<br>±0.095  | 0.046<br>±0.033  | <b>0.579</b><br>± <b>0.097</b> | 0.026<br>±0.026  | 0.605<br>± 0.090               | 0.067<br>±0.056 |
|                | AUC      | 0.837<br>±0.028 | 0.834<br>±0.043 | 0.841<br>±0.024 | 0.913<br>±0.020                | 0.751<br>±0.144 | 0.833<br>±0.058 | 0.887<br>±0.033 | 0.862<br>±0.034 | 0.638<br>±0.053  | 0.689<br>±0.043 | 0.758<br>±0.047 | 0.766<br>±0.020 | 0.879<br>±0.026 | 0.909<br>±0.042                | 0.541<br>±0.057  | 0.874<br>±0.040  | 0.662<br>±0.043  | 0.961<br>± 0.021               | 0.693<br>±0.032  | <b>0.945</b><br>± <b>0.017</b> | 0.733<br>±0.048 |
|                | BAcc     | 0.240<br>±0.052 | 0.215<br>±0.078 | 0.210<br>±0.042 | 0.375<br>±0.068                | 0.160<br>±0.084 | 0.350<br>±0.087 | 0.345<br>±0.076 | 0.315<br>±0.089 | 0.060<br>±0.049  | 0.110<br>±0.029 | 0.090<br>±0.029 | 0.135<br>±0.034 | 0.270<br>±0.080 | 0.515<br>±0.105                | 0.015<br>±0.014  | 0.480<br>±0.093  | 0.070<br>±0.033  | <b>0.590</b><br>± <b>0.095</b> | 0.050<br>±0.025  | 0.615<br>± 0.088               | 0.090<br>±0.055 |
|                | Acc_1    | 0.240<br>±0.052 | 0.215<br>±0.078 | 0.210<br>±0.042 | 0.375<br>±0.068                | 0.160<br>±0.084 | 0.378<br>±0.136 | 0.375<br>±0.109 | 0.319<br>±0.085 | 0.047<br>±0.044  | 0.144<br>±0.059 | 0.094<br>±0.037 | 0.113<br>±0.053 | 0.281<br>±0.079 | 0.594<br>±0.087                | 0.009<br>±0.009  | 0.478<br>±0.107  | 0.053<br>±0.030  | <b>0.613</b><br>± <b>0.129</b> | 0.041<br>±0.026  | 0.647<br>± 0.109               | 0.069<br>±0.048 |
|                | Acc_2    | 0.240<br>±0.052 | 0.215<br>±0.078 | 0.210<br>±0.042 | 0.375<br>±0.068                | 0.160<br>±0.084 | 0.378<br>±0.136 | 0.375<br>±0.109 | 0.319<br>±0.085 | 0.047<br>±0.044  | 0.144<br>±0.059 | 0.094<br>±0.037 | 0.113<br>±0.053 | 0.281<br>±0.079 | 0.594<br>±0.087                | 0.009<br>±0.009  | 0.478<br>±0.107  | 0.053<br>±0.030  | <b>0.613</b><br>± <b>0.129</b> | 0.041<br>±0.026  | 0.647<br>± 0.109               | 0.069<br>±0.048 |

Continued on next page



| Subject                | Metric         | DeepConvnet     | EEGNet          | Conformer       | CTNet           | SSVEPDNN        | BIOT (f)        | BIOT (l)        | BENDR (f)       | BENDR (l)       | CBraMod (f)      | CBraMod (l)     | EEGPT (f)       | EEGPT (l)       | LaBraM (f)      | LaBraM (l)      | STEEGformer-s (f) | STEEGformer-s (l) | STEEGformer-b (f) | STEEGformer-b (l) | STEEGformer-l (f) | STEEGformer-l (l) |
|------------------------|----------------|-----------------|-----------------|-----------------|-----------------|-----------------|-----------------|-----------------|-----------------|-----------------|------------------|-----------------|-----------------|-----------------|-----------------|-----------------|-------------------|-------------------|-------------------|-------------------|-------------------|-------------------|
| Subject21_sync         | Acc.2          | 0.340<br>±0.038 | 0.355<br>±0.076 | 0.345<br>±0.076 | 0.510<br>±0.076 | 0.270<br>±0.125 | 0.516<br>±0.135 | 0.541<br>±0.075 | 0.412<br>±0.139 | 0.113<br>±0.095 | 0.244<br>±0.051  | 0.172<br>±0.059 | 0.219<br>±0.055 | 0.428<br>±0.066 | 0.747<br>±0.060 | 0.044<br>±0.040 | 0.653<br>±0.071   | 0.062<br>±0.040   | 0.762<br>±0.082   | 0.075<br>±0.039   | 0.759<br>±0.075   | 0.156<br>±0.038   |
|                        | κ              | 0.385<br>±0.094 | 0.333<br>±0.101 | 0.272<br>±0.053 | 0.421<br>±0.095 | 0.174<br>±0.124 | 0.318<br>±0.069 | 0.256<br>±0.051 | 0.400<br>±0.107 | 0.021<br>±0.046 | 0.077<br>±0.026  | 0.026<br>±0.000 | 0.103<br>±0.075 | 0.267<br>±0.064 | 0.415<br>±0.033 | 0.005<br>±0.021 | 0.492<br>±0.053   | 0.056<br>±0.038   | 0.636<br>±0.056   | 0.036<br>±0.034   | 0.626<br>±0.104   | 0.000<br>±0.023   |
|                        | AUC            | 0.938<br>±0.025 | 0.907<br>±0.037 | 0.878<br>±0.032 | 0.955<br>±0.018 | 0.809<br>±0.174 | 0.819<br>±0.052 | 0.896<br>±0.013 | 0.909<br>±0.038 | 0.651<br>±0.052 | 0.685<br>±0.053  | 0.612<br>±0.062 | 0.746<br>±0.024 | 0.900<br>±0.020 | 0.898<br>±0.022 | 0.562<br>±0.030 | 0.896<br>±0.045   | 0.703<br>±0.046   | 0.953<br>±0.027   | 0.702<br>±0.046   | 0.942<br>±0.017   | 0.779<br>±0.043   |
|                        | BAcc           | 0.400<br>±0.092 | 0.350<br>±0.098 | 0.290<br>±0.052 | 0.435<br>±0.093 | 0.195<br>±0.120 | 0.335<br>±0.068 | 0.275<br>±0.050 | 0.415<br>±0.104 | 0.045<br>±0.045 | 0.100<br>±0.025  | 0.050<br>±0.000 | 0.125<br>±0.073 | 0.285<br>±0.063 | 0.430<br>±0.033 | 0.030<br>±0.021 | 0.505<br>±0.051   | 0.080<br>±0.037   | 0.645<br>±0.054   | 0.060<br>±0.034   | 0.635<br>±0.101   | 0.000<br>±0.022   |
|                        | Acc.1          | 0.400<br>±0.092 | 0.350<br>±0.098 | 0.290<br>±0.052 | 0.435<br>±0.093 | 0.195<br>±0.120 | 0.322<br>±0.092 | 0.237<br>±0.030 | 0.391<br>±0.112 | 0.028<br>±0.028 | 0.091<br>±0.036  | 0.087<br>±0.039 | 0.125<br>±0.089 | 0.244<br>±0.090 | 0.428<br>±0.045 | 0.028<br>±0.023 | 0.456<br>±0.053   | 0.087<br>±0.032   | 0.656<br>±0.072   | 0.056<br>±0.028   | 0.622<br>±0.095   | 0.006<br>±0.034   |
|                        | Acc.2          | 0.590<br>±0.114 | 0.495<br>±0.102 | 0.410<br>±0.101 | 0.655<br>±0.147 | 0.330<br>±0.173 | 0.441<br>±0.111 | 0.400<br>±0.085 | 0.506<br>±0.128 | 0.062<br>±0.044 | 0.163<br>±0.067  | 0.131<br>±0.055 | 0.194<br>±0.090 | 0.409<br>±0.028 | 0.609<br>±0.049 | 0.062<br>±0.037 | 0.662<br>±0.028   | 0.141<br>±0.031   | 0.775<br>±0.069   | 0.084<br>±0.036   | 0.809<br>±0.060   | 0.100<br>±0.022   |
|                        | Subject22_sync | κ               | 0.533<br>±0.071 | 0.467<br>±0.084 | 0.451<br>±0.139 | 0.549<br>±0.080 | 0.246<br>±0.158 | 0.533<br>±0.064 | 0.421<br>±0.097 | 0.554<br>±0.050 | 0.056<br>±0.046  | 0.103<br>±0.044 | 0.062<br>±0.034 | 0.215<br>±0.047 | 0.395<br>±0.078 | 0.559<br>±0.078 | 0.021<br>±0.033   | 0.538<br>±0.085   | -0.005<br>±0.011  | 0.656<br>±0.076   | 0.026<br>±0.000   | 0.713<br>±0.088   |
| AUC                    |                | 0.972<br>±0.009 | 0.949<br>±0.020 | 0.948<br>±0.020 | 0.969<br>±0.008 | 0.831<br>±0.186 | 0.929<br>±0.022 | 0.962<br>±0.013 | 0.955<br>±0.023 | 0.697<br>±0.050 | 0.706<br>±0.048  | 0.779<br>±0.039 | 0.826<br>±0.034 | 0.927<br>±0.021 | 0.953<br>±0.017 | 0.596<br>±0.046 | 0.897<br>±0.030   | 0.639<br>±0.051   | 0.979<br>±0.010   | 0.660<br>±0.061   | 0.961<br>±0.029   | 0.731<br>±0.073   |
| BAcc                   |                | 0.545<br>±0.069 | 0.480<br>±0.082 | 0.465<br>±0.135 | 0.560<br>±0.078 | 0.265<br>±0.154 | 0.545<br>±0.062 | 0.435<br>±0.095 | 0.565<br>±0.049 | 0.080<br>±0.045 | 0.125<br>±0.043  | 0.085<br>±0.034 | 0.235<br>±0.045 | 0.410<br>±0.076 | 0.570<br>±0.076 | 0.045<br>±0.033 | 0.550<br>±0.083   | 0.020<br>±0.011   | 0.665<br>±0.074   | 0.050<br>±0.000   | 0.720<br>±0.086   | 0.060<br>±0.014   |
| Acc.1                  |                | 0.545<br>±0.069 | 0.480<br>±0.082 | 0.465<br>±0.135 | 0.560<br>±0.078 | 0.265<br>±0.154 | 0.594<br>±0.086 | 0.431<br>±0.102 | 0.578<br>±0.070 | 0.069<br>±0.045 | 0.125<br>±0.038  | 0.128<br>±0.074 | 0.297<br>±0.047 | 0.453<br>±0.092 | 0.647<br>±0.065 | 0.047<br>±0.040 | 0.597<br>±0.096   | 0.031<br>±0.029   | 0.697<br>±0.079   | 0.059<br>±0.026   | 0.741<br>±0.114   | 0.047<br>±0.027   |
| Acc.2                  |                | 0.780<br>±0.065 | 0.650<br>±0.098 | 0.580<br>±0.096 | 0.760<br>±0.038 | 0.395<br>±0.203 | 0.791<br>±0.061 | 0.709<br>±0.080 | 0.784<br>±0.013 | 0.100<br>±0.050 | 0.206<br>±0.055  | 0.203<br>±0.079 | 0.419<br>±0.084 | 0.622<br>±0.075 | 0.769<br>±0.037 | 0.103<br>±0.024 | 0.738<br>±0.115   | 0.075<br>±0.036   | 0.831<br>±0.039   | 0.106<br>±0.030   | 0.894<br>±0.064   | 0.119<br>±0.009   |
| Subject23_sync         |                | κ               | 0.005<br>±0.028 | 0.010<br>±0.014 | 0.036<br>±0.029 | 0.000<br>±0.026 | 0.010<br>±0.029 | 0.036<br>±0.039 | 0.015<br>±0.039 | 0.026<br>±0.026 | -0.005<br>±0.021 | 0.031<br>±0.042 | 0.046<br>±0.064 | 0.026<br>±0.018 | 0.062<br>±0.023 | 0.072<br>±0.021 | -0.005<br>±0.021  | 0.072<br>±0.076   | 0.000<br>±0.018   | 0.051<br>±0.054   | -0.005<br>±0.021  | 0.108<br>±0.064   |
|                        | AUC            | 0.586<br>±0.036 | 0.572<br>±0.043 | 0.584<br>±0.023 | 0.578<br>±0.017 | 0.517<br>±0.042 | 0.597<br>±0.063 | 0.535<br>±0.040 | 0.529<br>±0.010 | 0.557<br>±0.059 | 0.621<br>±0.066  | 0.744<br>±0.036 | 0.602<br>±0.059 | 0.676<br>±0.028 | 0.639<br>±0.036 | 0.517<br>±0.038 | 0.602<br>±0.075   | 0.569<br>±0.031   | 0.634<br>±0.062   | 0.544<br>±0.033   | 0.649<br>±0.028   | 0.560<br>±0.028   |
|                        | BAcc           | 0.030<br>±0.027 | 0.035<br>±0.014 | 0.060<br>±0.029 | 0.025<br>±0.025 | 0.035<br>±0.029 | 0.060<br>±0.038 | 0.040<br>±0.038 | 0.050<br>±0.025 | 0.020<br>±0.021 | 0.055<br>±0.041  | 0.070<br>±0.062 | 0.050<br>±0.018 | 0.085<br>±0.022 | 0.095<br>±0.021 | 0.020<br>±0.021 | 0.095<br>±0.074   | 0.025<br>±0.018   | 0.075<br>±0.053   | 0.020<br>±0.021   | 0.130<br>±0.062   | 0.015<br>±0.014   |
|                        | Acc.1          | 0.030<br>±0.027 | 0.035<br>±0.014 | 0.060<br>±0.029 | 0.025<br>±0.025 | 0.035<br>±0.029 | 0.075<br>±0.058 | 0.044<br>±0.047 | 0.041<br>±0.026 | 0.031<br>±0.031 | 0.053<br>±0.034  | 0.091<br>±0.079 | 0.069<br>±0.049 | 0.109<br>±0.052 | 0.078<br>±0.037 | 0.031<br>±0.031 | 0.097<br>±0.053   | 0.025<br>±0.030   | 0.056<br>±0.048   | 0.022<br>±0.032   | 0.128<br>±0.061   | 0.019<br>±0.026   |
| Continued on next page |                |                 |                 |                 |                 |                 |                 |                 |                 |                 |                  |                 |                 |                 |                 |                 |                   |                   |                   |                   |                   |                   |

5352  
5353  
5354  
5355  
5356  
5357  
5358  
5359  
5360  
5361  
5362  
5363  
5364  
5365  
5366  
5367  
5368  
5369  
5370  
5371  
5372  
5373  
5374  
5375  
5376  
5377  
5378  
5379  
5380  
5381  
5382  
5383  
5384

| Subject        | Metric   | DeepConvnet     | EEGNet          | Conformer       | CTNet           | SSVEPDNN        | BIOT (f)        | BIOT (f)        | BENDR (f)       | BENDR (f)        | CBraMod (f)     | CBraMod (f)     | EEGPT (f)       | EEGPT (f)       | LaBraM (f)                     | LaBraM (f)       | STEGformer-s (f) | STEGformer-s (f) | STEGformer-h (f)               | STEGformer-h (f) | STEGformer-l (f)               | Under review    |
|----------------|----------|-----------------|-----------------|-----------------|-----------------|-----------------|-----------------|-----------------|-----------------|------------------|-----------------|-----------------|-----------------|-----------------|--------------------------------|------------------|------------------|------------------|--------------------------------|------------------|--------------------------------|-----------------|
|                | Acc.2    | 0.075<br>±0.035 | 0.100<br>±0.035 | 0.090<br>±0.014 | 0.075<br>±0.018 | 0.060<br>±0.042 | 0.156<br>±0.063 | 0.053<br>±0.045 | 0.053<br>±0.026 | 0.072<br>±0.051  | 0.113<br>±0.071 | 0.181<br>±0.073 | 0.100<br>±0.083 | 0.159<br>±0.081 | <b>0.194</b><br>± <b>0.046</b> | 0.078<br>±0.031  | 0.184<br>±0.081  | 0.053<br>±0.042  | 0.116<br>±0.075                | 0.041<br>±0.042  | 0.222<br>± 0.117               | 0.056<br>±0.051 |
| Subject24_sync | $\kappa$ | 0.041<br>±0.050 | 0.046<br>±0.033 | 0.056<br>±0.046 | 0.041<br>±0.014 | 0.015<br>±0.014 | 0.087<br>±0.069 | 0.041<br>±0.029 | 0.041<br>±0.029 | 0.021<br>±0.028  | 0.046<br>±0.028 | 0.036<br>±0.014 | 0.036<br>±0.043 | 0.077<br>±0.031 | 0.256<br>±0.031                | 0.010<br>±0.014  | 0.226<br>±0.038  | 0.026<br>±0.036  | 0.395<br>± 0.111               | -0.005<br>±0.021 | <b>0.318</b><br>± <b>0.062</b> | 0.050<br>±0.034 |
|                | AUC      | 0.646<br>±0.031 | 0.610<br>±0.043 | 0.699<br>±0.042 | 0.700<br>±0.044 | 0.593<br>±0.061 | 0.647<br>±0.071 | 0.676<br>±0.050 | 0.591<br>±0.043 | 0.528<br>±0.044  | 0.660<br>±0.067 | 0.688<br>±0.027 | 0.628<br>±0.048 | 0.723<br>±0.019 | 0.795<br>±0.034                | 0.552<br>±0.023  | 0.756<br>±0.040  | 0.639<br>±0.016  | 0.904<br>± 0.030               | 0.612<br>±0.021  | <b>0.843</b><br>± <b>0.016</b> | 0.603<br>±0.025 |
|                | BAcc     | 0.065<br>±0.049 | 0.070<br>±0.033 | 0.080<br>±0.045 | 0.065<br>±0.014 | 0.040<br>±0.014 | 0.110<br>±0.068 | 0.065<br>±0.029 | 0.065<br>±0.029 | 0.045<br>±0.027  | 0.070<br>±0.027 | 0.060<br>±0.014 | 0.060<br>±0.042 | 0.100<br>±0.031 | 0.275<br>±0.031                | 0.035<br>±0.014  | 0.245<br>±0.037  | 0.050<br>±0.035  | 0.410<br>± 0.108               | 0.020<br>±0.021  | <b>0.335</b><br>± <b>0.060</b> | 0.050<br>±0.034 |
|                | Acc.1    | 0.065<br>±0.049 | 0.070<br>±0.033 | 0.080<br>±0.045 | 0.065<br>±0.014 | 0.040<br>±0.014 | 0.144<br>±0.093 | 0.069<br>±0.054 | 0.069<br>±0.057 | 0.047<br>±0.033  | 0.091<br>±0.063 | 0.075<br>±0.042 | 0.075<br>±0.030 | 0.128<br>±0.060 | 0.331<br>±0.053                | 0.022<br>±0.009  | 0.275<br>±0.074  | 0.031<br>±0.022  | 0.472<br>± 0.105               | 0.013<br>±0.013  | <b>0.388</b><br>± <b>0.056</b> | 0.052<br>±0.021 |
|                | Acc.2    | 0.100<br>±0.056 | 0.090<br>±0.038 | 0.170<br>±0.041 | 0.110<br>±0.045 | 0.100<br>±0.035 | 0.231<br>±0.092 | 0.122<br>±0.064 | 0.116<br>±0.075 | 0.066<br>±0.034  | 0.159<br>±0.066 | 0.122<br>±0.045 | 0.150<br>±0.054 | 0.178<br>±0.053 | 0.453<br>±0.071                | 0.050<br>±0.023  | 0.384<br>±0.068  | 0.047<br>±0.025  | <b>0.584</b><br>± <b>0.067</b> | 0.034<br>±0.007  | 0.594<br>± 0.074               | 0.057<br>±0.017 |
|                | $\kappa$ | 0.082<br>±0.058 | 0.010<br>±0.029 | 0.026<br>±0.026 | 0.015<br>±0.034 | 0.051<br>±0.048 | 0.205<br>±0.112 | 0.041<br>±0.029 | 0.338<br>±0.118 | -0.010<br>±0.014 | 0.159<br>±0.011 | 0.051<br>±0.041 | 0.067<br>±0.029 | 0.021<br>±0.021 | 0.385<br>±0.081                | 0.005<br>±0.033  | 0.462<br>±0.104  | 0.036<br>±0.039  | 0.733<br>± 0.047               | 0.021<br>±0.021  | <b>0.697</b><br>± <b>0.076</b> | 0.028<br>±0.028 |
| Subject25_sync | AUC      | 0.786<br>±0.049 | 0.642<br>±0.076 | 0.820<br>±0.039 | 0.554<br>±0.039 | 0.767<br>±0.151 | 0.770<br>±0.058 | 0.671<br>±0.051 | 0.860<br>±0.022 | 0.429<br>±0.047  | 0.726<br>±0.040 | 0.695<br>±0.036 | 0.672<br>±0.036 | 0.606<br>±0.031 | 0.849<br>±0.049                | 0.561<br>±0.057  | 0.884<br>±0.034  | 0.703<br>±0.024  | 0.971<br>± 0.024               | 0.664<br>±0.039  | <b>0.969</b><br>± <b>0.017</b> | 0.733<br>±0.039 |
|                | BAcc     | 0.105<br>±0.057 | 0.035<br>±0.029 | 0.050<br>±0.025 | 0.040<br>±0.034 | 0.075<br>±0.047 | 0.225<br>±0.109 | 0.065<br>±0.029 | 0.355<br>±0.115 | 0.015<br>±0.014  | 0.180<br>±0.011 | 0.075<br>±0.040 | 0.090<br>±0.029 | 0.045<br>±0.021 | 0.400<br>±0.079                | 0.030<br>±0.033  | 0.475<br>±0.102  | 0.060<br>±0.038  | 0.740<br>± 0.045               | 0.045<br>±0.021  | <b>0.705</b><br>± <b>0.074</b> | 0.075<br>±0.018 |
|                | Acc.1    | 0.105<br>±0.057 | 0.035<br>±0.029 | 0.050<br>±0.025 | 0.040<br>±0.034 | 0.075<br>±0.047 | 0.244<br>±0.139 | 0.087<br>±0.018 | 0.359<br>±0.108 | 0.009<br>±0.009  | 0.216<br>±0.039 | 0.056<br>±0.042 | 0.131<br>±0.038 | 0.037<br>±0.032 | 0.456<br>±0.062                | 0.028<br>±0.028  | 0.503<br>±0.111  | 0.066<br>±0.086  | 0.781<br>± 0.038               | 0.084<br>±0.050  | <b>0.769</b><br>± <b>0.063</b> | 0.084<br>±0.045 |
|                | Acc.2    | 0.230<br>±0.114 | 0.095<br>±0.057 | 0.150<br>±0.031 | 0.085<br>±0.042 | 0.185<br>±0.099 | 0.384<br>±0.141 | 0.203<br>±0.136 | 0.484<br>±0.063 | 0.034<br>±0.037  | 0.316<br>±0.078 | 0.109<br>±0.051 | 0.169<br>±0.042 | 0.103<br>±0.056 | 0.553<br>±0.045                | 0.084<br>±0.026  | 0.625<br>±0.086  | 0.097<br>±0.095  | <b>0.859</b><br>± <b>0.062</b> | 0.138<br>±0.049  | 0.884<br>± 0.032               | 0.147<br>±0.065 |
|                | $\kappa$ | 0.144<br>±0.053 | 0.097<br>±0.033 | 0.133<br>±0.084 | 0.251<br>±0.038 | 0.062<br>±0.059 | 0.441<br>±0.080 | 0.179<br>±0.092 | 0.282<br>±0.079 | 0.015<br>±0.029  | 0.067<br>±0.043 | 0.026<br>±0.026 | 0.046<br>±0.056 | 0.092<br>±0.047 | 0.318<br>±0.053                | -0.010<br>±0.023 | 0.241<br>±0.050  | 0.000<br>±0.018  | <b>0.497</b><br>± <b>0.097</b> | 0.021<br>±0.021  | 0.538<br>± 0.079               | 0.031<br>±0.033 |
|                | AUC      | 0.761<br>±0.023 | 0.772<br>±0.043 | 0.789<br>±0.012 | 0.883<br>±0.037 | 0.684<br>±0.109 | 0.911<br>±0.027 | 0.852<br>±0.018 | 0.856<br>±0.039 | 0.563<br>±0.031  | 0.655<br>±0.051 | 0.728<br>±0.016 | 0.670<br>±0.045 | 0.751<br>±0.033 | 0.829<br>±0.034                | 0.521<br>±0.034  | 0.762<br>±0.032  | 0.572<br>±0.022  | <b>0.928</b><br>± <b>0.025</b> | 0.625<br>±0.041  | 0.928<br>± 0.028               | 0.668<br>±0.047 |
| Subject26_sync | BAcc     | 0.165<br>±0.052 | 0.120<br>±0.033 | 0.155<br>±0.082 | 0.270<br>±0.037 | 0.085<br>±0.058 | 0.455<br>±0.078 | 0.200<br>±0.090 | 0.300<br>±0.077 | 0.040<br>±0.029  | 0.090<br>±0.042 | 0.050<br>±0.025 | 0.070<br>±0.054 | 0.115<br>±0.045 | 0.335<br>±0.052                | 0.015<br>±0.022  | 0.260<br>±0.049  | 0.025<br>±0.018  | <b>0.510</b><br>± <b>0.095</b> | 0.045<br>±0.021  | 0.550<br>± 0.077               | 0.055<br>±0.033 |
|                | Acc.1    | 0.165<br>±0.052 | 0.120<br>±0.033 | 0.155<br>±0.082 | 0.270<br>±0.037 | 0.085<br>±0.058 | 0.463<br>±0.122 | 0.219<br>±0.128 | 0.300<br>±0.074 | 0.034<br>±0.036  | 0.072<br>±0.026 | 0.041<br>±0.032 | 0.119<br>±0.100 | 0.156<br>±0.086 | 0.341<br>±0.087                | 0.028<br>±0.039  | 0.247<br>±0.069  | 0.025<br>±0.024  | <b>0.478</b><br>± <b>0.078</b> | 0.059<br>±0.028  | 0.550<br>± 0.100               | 0.034<br>±0.020 |

Continued on next page

| Subject        | Metric   | DeepConvnet                    | EEGNet          | Conformer       | CTNet           | SSVEPDNN         | BIOT (f)        | BIOT (l)        | BENDR (f)       | BENDR (l)       | CBraMod (f)     | CBraMod (l)                    | EEGPT (f)       | EEGPT (l)       | LaBraM (f)                     | LaBraM (l)      | STEEGformer-s (f) | STEEGformer-s (l) | STEEGformer-h (f)              | STEEGformer-h (l) | STEEGformer-l (f)              | Under review     |
|----------------|----------|--------------------------------|-----------------|-----------------|-----------------|------------------|-----------------|-----------------|-----------------|-----------------|-----------------|--------------------------------|-----------------|-----------------|--------------------------------|-----------------|-------------------|-------------------|--------------------------------|-------------------|--------------------------------|------------------|
| Subject27_sync | Acc_2    | 0.245<br>±0.069                | 0.215<br>±0.022 | 0.220<br>±0.087 | 0.435<br>±0.068 | 0.160<br>±0.098  | 0.634<br>±0.080 | 0.397<br>±0.118 | 0.431<br>±0.115 | 0.084<br>±0.065 | 0.166<br>±0.076 | 0.094<br>±0.065                | 0.188<br>±0.061 | 0.241<br>±0.120 | 0.450<br>±0.049                | 0.041<br>±0.038 | 0.372<br>±0.068   | 0.062<br>±0.054   | 0.697<br>±0.079                | 0.103<br>±0.069   | <b>0.681</b><br>± <b>0.089</b> | 0.009<br>±0.028  |
|                | $\kappa$ | 0.077<br>±0.000                | 0.046<br>±0.038 | 0.056<br>±0.046 | 0.103<br>±0.018 | 0.015<br>±0.029  | 0.082<br>±0.033 | 0.077<br>±0.018 | 0.031<br>±0.042 | 0.000<br>±0.031 | 0.046<br>±0.056 | 0.031<br>±0.033                | 0.015<br>±0.023 | 0.062<br>±0.053 | 0.190<br>±0.062                | 0.010<br>±0.029 | 0.133<br>±0.056   | -0.015<br>±0.014  | 0.221<br>±0.062                | -0.021<br>±0.011  | <b>0.210</b><br>± <b>0.098</b> | 0.000<br>±0.033  |
|                | AUC      | 0.690<br>±0.028                | 0.665<br>±0.037 | 0.646<br>±0.057 | 0.711<br>±0.058 | 0.555<br>±0.047  | 0.612<br>±0.021 | 0.681<br>±0.051 | 0.674<br>±0.053 | 0.504<br>±0.053 | 0.600<br>±0.062 | 0.653<br>±0.061                | 0.601<br>±0.042 | 0.659<br>±0.041 | 0.718<br>±0.029                | 0.522<br>±0.030 | 0.635<br>±0.045   | 0.550<br>±0.023   | 0.783<br>±0.016                | 0.507<br>±0.025   | <b>0.765</b><br>± <b>0.015</b> | 0.503<br>±0.038  |
|                | BAcc     | 0.100<br>±0.000                | 0.070<br>±0.037 | 0.080<br>±0.045 | 0.125<br>±0.018 | 0.040<br>±0.029  | 0.105<br>±0.033 | 0.100<br>±0.018 | 0.055<br>±0.041 | 0.025<br>±0.031 | 0.070<br>±0.054 | 0.055<br>±0.033                | 0.040<br>±0.022 | 0.085<br>±0.052 | 0.210<br>±0.060                | 0.035<br>±0.029 | 0.155<br>±0.054   | 0.010<br>±0.014   | 0.240<br>±0.060                | 0.005<br>±0.011   | <b>0.230</b><br>± <b>0.096</b> | 0.000<br>±0.033  |
|                | Acc_1    | 0.100<br>±0.000                | 0.070<br>±0.037 | 0.080<br>±0.045 | 0.125<br>±0.018 | 0.040<br>±0.029  | 0.084<br>±0.014 | 0.091<br>±0.034 | 0.053<br>±0.051 | 0.025<br>±0.039 | 0.100<br>±0.080 | 0.053<br>±0.059                | 0.044<br>±0.039 | 0.100<br>±0.054 | 0.206<br>±0.062                | 0.050<br>±0.040 | 0.172<br>±0.070   | 0.006<br>±0.009   | <b>0.216</b><br>± <b>0.078</b> | 0.013<br>±0.028   | 0.237<br>±0.143                | 0.009<br>±0.020  |
|                | Acc_2    | 0.170<br>±0.054                | 0.150<br>±0.025 | 0.150<br>±0.066 | 0.190<br>±0.052 | 0.085<br>±0.074  | 0.116<br>±0.021 | 0.138<br>±0.043 | 0.106<br>±0.030 | 0.041<br>±0.065 | 0.131<br>±0.089 | 0.141<br>±0.091                | 0.103<br>±0.065 | 0.172<br>±0.046 | 0.281<br>±0.107                | 0.109<br>±0.083 | 0.228<br>±0.085   | 0.016<br>±0.016   | <b>0.287</b><br>± <b>0.083</b> | 0.056<br>±0.046   | 0.306<br>±0.145                | 0.003<br>±0.022  |
|                | $\kappa$ | 0.159<br>±0.061                | 0.103<br>±0.018 | 0.097<br>±0.028 | 0.159<br>±0.058 | 0.041<br>±0.047  | 0.077<br>±0.063 | 0.056<br>±0.061 | 0.108<br>±0.021 | 0.036<br>±0.029 | 0.077<br>±0.041 | 0.041<br>±0.029                | 0.067<br>±0.014 | 0.087<br>±0.069 | <b>0.154</b><br>± <b>0.031</b> | 0.026<br>±0.018 | 0.092<br>±0.064   | 0.026<br>±0.026   | 0.113<br>±0.034                | 0.031<br>±0.021   | 0.133<br>±0.118                | 0.000<br>±0.023  |
| Subject28_sync | AUC      | <b>0.812</b><br>± <b>0.053</b> | 0.771<br>±0.036 | 0.787<br>±0.045 | 0.814<br>±0.041 | 0.671<br>±0.099  | 0.645<br>±0.045 | 0.706<br>±0.023 | 0.691<br>±0.024 | 0.620<br>±0.032 | 0.703<br>±0.036 | 0.640<br>±0.057                | 0.616<br>±0.039 | 0.768<br>±0.053 | 0.717<br>±0.046                | 0.561<br>±0.056 | 0.646<br>±0.056   | 0.650<br>±0.039   | 0.747<br>±0.034                | 0.618<br>±0.027   | 0.734<br>±0.045                | 0.671<br>±0.030  |
|                | BAcc     | 0.180<br>±0.060                | 0.125<br>±0.018 | 0.120<br>±0.027 | 0.180<br>±0.057 | 0.065<br>±0.045  | 0.100<br>±0.061 | 0.080<br>±0.060 | 0.130<br>±0.021 | 0.060<br>±0.029 | 0.100<br>±0.040 | 0.065<br>±0.029                | 0.090<br>±0.014 | 0.110<br>±0.068 | <b>0.175</b><br>± <b>0.031</b> | 0.050<br>±0.018 | 0.115<br>±0.063   | 0.050<br>±0.025   | 0.135<br>±0.034                | 0.055<br>±0.021   | 0.155<br>±0.115                | 0.055<br>±0.033  |
|                | Acc_1    | 0.180<br>±0.060                | 0.125<br>±0.018 | 0.120<br>±0.027 | 0.180<br>±0.057 | 0.065<br>±0.045  | 0.147<br>±0.098 | 0.078<br>±0.072 | 0.156<br>±0.076 | 0.047<br>±0.037 | 0.094<br>±0.046 | 0.087<br>±0.046                | 0.103<br>±0.061 | 0.125<br>±0.095 | <b>0.175</b><br>± <b>0.068</b> | 0.041<br>±0.030 | 0.119<br>±0.086   | 0.031<br>±0.016   | 0.150<br>±0.082                | 0.072<br>±0.050   | 0.172<br>±0.141                | 0.034<br>±0.020  |
|                | Acc_2    | <b>0.320</b><br>± <b>0.132</b> | 0.240<br>±0.022 | 0.210<br>±0.045 | 0.280<br>±0.041 | 0.130<br>±0.082  | 0.222<br>±0.084 | 0.163<br>±0.051 | 0.234<br>±0.096 | 0.091<br>±0.042 | 0.216<br>±0.068 | 0.122<br>±0.034                | 0.131<br>±0.059 | 0.253<br>±0.129 | 0.334<br>±0.112                | 0.069<br>±0.042 | 0.178<br>±0.095   | 0.059<br>±0.046   | 0.259<br>±0.123                | 0.106<br>±0.040   | 0.294<br>±0.122                | 0.081<br>±0.049  |
|                | $\kappa$ | 0.031<br>±0.056                | 0.015<br>±0.023 | 0.036<br>±0.050 | 0.021<br>±0.028 | -0.005<br>±0.021 | 0.015<br>±0.039 | 0.021<br>±0.038 | 0.046<br>±0.049 | 0.000<br>±0.036 | 0.051<br>±0.031 | 0.051<br>±0.036                | 0.015<br>±0.023 | 0.036<br>±0.034 | 0.087<br>±0.067                | 0.021<br>±0.033 | 0.046<br>±0.038   | 0.021<br>±0.028   | 0.144<br>±0.034                | 0.026<br>±0.044   | <b>0.108</b><br>± <b>0.056</b> | -0.010<br>±0.023 |
|                | AUC      | 0.654<br>±0.021                | 0.626<br>±0.028 | 0.624<br>±0.030 | 0.581<br>±0.028 | 0.583<br>±0.057  | 0.555<br>±0.022 | 0.545<br>±0.060 | 0.571<br>±0.014 | 0.521<br>±0.068 | 0.624<br>±0.063 | <b>0.689</b><br>± <b>0.040</b> | 0.560<br>±0.045 | 0.663<br>±0.050 | 0.622<br>±0.055                | 0.514<br>±0.064 | 0.586<br>±0.045   | 0.581<br>±0.029   | 0.717<br>±0.034                | 0.553<br>±0.021   | 0.656<br>±0.022                | 0.585<br>±0.016  |
| Subject29_sync | BAcc     | 0.055<br>±0.054                | 0.040<br>±0.022 | 0.060<br>±0.049 | 0.045<br>±0.027 | 0.020<br>±0.021  | 0.040<br>±0.038 | 0.045<br>±0.037 | 0.070<br>±0.048 | 0.025<br>±0.035 | 0.075<br>±0.031 | 0.075<br>±0.035                | 0.040<br>±0.022 | 0.060<br>±0.034 | 0.110<br>±0.065                | 0.045<br>±0.033 | 0.070<br>±0.037   | 0.045<br>±0.027   | 0.165<br>±0.034                | 0.050<br>±0.043   | <b>0.130</b><br>± <b>0.054</b> | 0.015<br>±0.022  |
|                | Acc_1    | 0.055<br>±0.054                | 0.040<br>±0.022 | 0.060<br>±0.049 | 0.045<br>±0.027 | 0.020<br>±0.021  | 0.053<br>±0.045 | 0.037<br>±0.042 | 0.072<br>±0.069 | 0.034<br>±0.061 | 0.075<br>±0.037 | 0.072<br>±0.051                | 0.034<br>±0.034 | 0.094<br>±0.079 | 0.153<br>±0.094                | 0.047<br>±0.048 | 0.072<br>±0.042   | 0.037<br>±0.021   | 0.141<br>±0.033                | 0.059<br>±0.068   | <b>0.147</b><br>± <b>0.056</b> | 0.019<br>±0.034  |

Continued on next page

| Subject        | Metric         | DeepConvnet     | EEGNet          | Conformer       | CTNet            | SSVEPDNN         | BIOT (f)         | BIOT (l)        | BENDR (f)       | BENDR (l)        | CBraMod (f)     | CBraMod (l)     | EEGPT (f)        | EEGPT (l)       | LaBraM (f)       | LaBraM (l)      | STEEGformer-s (f) | STEEGformer-s (l) | STEEGformer-b (f) | STEEGformer-b (l) | STEEGformer-l (f) | STEEGformer-l (l) |                 |
|----------------|----------------|-----------------|-----------------|-----------------|------------------|------------------|------------------|-----------------|-----------------|------------------|-----------------|-----------------|------------------|-----------------|------------------|-----------------|-------------------|-------------------|-------------------|-------------------|-------------------|-------------------|-----------------|
| Subject2_sync  | Acc.2          | 0.105<br>±0.072 | 0.115<br>±0.055 | 0.110<br>±0.052 | 0.085<br>±0.022  | 0.065<br>±0.055  | 0.072<br>±0.036  | 0.072<br>±0.061 | 0.109<br>±0.103 | 0.053<br>±0.067  | 0.122<br>±0.036 | 0.119<br>±0.054 | 0.069<br>±0.058  | 0.144<br>±0.115 | 0.228<br>± 0.112 | 0.056<br>±0.042 | 0.150<br>±0.050   | 0.059<br>±0.032   | 0.206<br>± 0.026  | 0.122<br>±0.082   | 0.228<br>± 0.063  | 0.056<br>±0.049   |                 |
|                | κ              | 0.056<br>±0.028 | 0.056<br>±0.042 | 0.067<br>±0.039 | 0.113<br>±0.072  | 0.041<br>±0.029  | 0.133<br>±0.109  | 0.077<br>±0.041 | 0.031<br>±0.011 | -0.010<br>±0.014 | 0.041<br>±0.014 | 0.000<br>±0.026 | 0.036<br>±0.039  | 0.041<br>±0.053 | 0.200<br>± 0.097 | 0.000<br>±0.018 | 0.092<br>±0.069   | 0.000<br>±0.018   | 0.313<br>± 0.042  | 0.015<br>±0.023   | 0.185<br>±0.046   | 0.000<br>±0.021   |                 |
|                | AUC            | 0.720<br>±0.023 | 0.660<br>±0.046 | 0.734<br>±0.034 | 0.783<br>± 0.040 | 0.601<br>±0.065  | 0.716<br>±0.050  | 0.733<br>±0.052 | 0.605<br>±0.031 | 0.528<br>±0.034  | 0.654<br>±0.038 | 0.657<br>±0.033 | 0.564<br>±0.059  | 0.669<br>±0.040 | 0.731<br>±0.045  | 0.512<br>±0.049 | 0.638<br>±0.054   | 0.586<br>±0.046   | 0.825<br>± 0.037  | 0.597<br>±0.055   | 0.761<br>±0.027   | 0.666<br>±0.048   |                 |
|                | BAcc           | 0.080<br>±0.027 | 0.080<br>±0.041 | 0.090<br>±0.038 | 0.135<br>±0.070  | 0.065<br>±0.029  | 0.155<br>±0.107  | 0.100<br>±0.040 | 0.055<br>±0.011 | 0.015<br>±0.014  | 0.065<br>±0.014 | 0.025<br>±0.025 | 0.060<br>±0.038  | 0.065<br>±0.052 | 0.220<br>± 0.094 | 0.025<br>±0.018 | 0.115<br>±0.068   | 0.025<br>±0.018   | 0.330<br>± 0.041  | 0.040<br>±0.022   | 0.205<br>±0.045   | 0.000<br>±0.021   |                 |
|                | Acc.1          | 0.080<br>±0.027 | 0.080<br>±0.041 | 0.090<br>±0.038 | 0.135<br>±0.070  | 0.065<br>±0.029  | 0.172<br>±0.094  | 0.091<br>±0.056 | 0.044<br>±0.020 | 0.009<br>±0.009  | 0.050<br>±0.017 | 0.025<br>±0.032 | 0.066<br>±0.047  | 0.069<br>±0.071 | 0.278<br>± 0.112 | 0.025<br>±0.024 | 0.138<br>±0.082   | 0.016<br>±0.011   | 0.347<br>± 0.081  | 0.062<br>±0.022   | 0.278<br>± 0.072  | 0.009<br>±0.043   |                 |
|                | Acc.2          | 0.160<br>±0.038 | 0.135<br>±0.029 | 0.160<br>±0.022 | 0.270<br>±0.089  | 0.095<br>±0.037  | 0.312<br>±0.146  | 0.172<br>±0.072 | 0.069<br>±0.036 | 0.019<br>±0.007  | 0.147<br>±0.063 | 0.116<br>±0.024 | 0.103<br>±0.060  | 0.147<br>±0.116 | 0.328<br>±0.106  | 0.050<br>±0.026 | 0.294<br>±0.050   | 0.041<br>±0.024   | 0.475<br>± 0.074  | 0.113<br>±0.020   | 0.466<br>± 0.100  | 0.058<br>±0.046   |                 |
|                | Subject30_sync | κ               | 0.144<br>±0.053 | 0.087<br>±0.034 | 0.103<br>±0.068  | 0.179<br>±0.031  | 0.072<br>±0.058  | 0.195<br>±0.029 | 0.133<br>±0.033 | 0.123<br>±0.056  | 0.026<br>±0.060 | 0.036<br>±0.039 | 0.046<br>±0.021  | 0.108<br>±0.090 | 0.113<br>±0.043  | 0.195<br>±0.014 | -0.015<br>±0.014  | 0.118<br>±0.029   | 0.026<br>±0.018   | 0.287<br>± 0.011  | 0.046<br>±0.033   | 0.221<br>± 0.062  | 0.000<br>±0.023 |
|                |                | AUC             | 0.779<br>±0.032 | 0.745<br>±0.036 | 0.724<br>±0.050  | 0.814<br>± 0.044 | 0.663<br>±0.092  | 0.752<br>±0.023 | 0.783<br>±0.032 | 0.741<br>±0.046  | 0.557<br>±0.041 | 0.611<br>±0.043 | 0.704<br>±0.055  | 0.727<br>±0.072 | 0.764<br>±0.015  | 0.740<br>±0.031 | 0.514<br>±0.042   | 0.632<br>±0.019   | 0.583<br>±0.038   | 0.788<br>± 0.048  | 0.572<br>±0.034   | 0.764<br>±0.027   | 0.608<br>±0.055 |
| BAcc           |                | 0.165<br>±0.052 | 0.110<br>±0.034 | 0.125<br>±0.066 | 0.200<br>±0.031  | 0.095<br>±0.057  | 0.215<br>±0.029  | 0.155<br>±0.033 | 0.145<br>±0.054 | 0.050<br>±0.059  | 0.060<br>±0.038 | 0.070<br>±0.021 | 0.130<br>±0.087  | 0.135<br>±0.042 | 0.215<br>±0.014  | 0.010<br>±0.014 | 0.140<br>±0.029   | 0.050<br>±0.018   | 0.305<br>± 0.011  | 0.070<br>±0.033   | 0.240<br>± 0.060  | 0.030<br>±0.033   |                 |
| Acc.1          |                | 0.165<br>±0.052 | 0.110<br>±0.034 | 0.125<br>±0.066 | 0.200<br>±0.031  | 0.095<br>±0.057  | 0.266<br>± 0.076 | 0.172<br>±0.022 | 0.138<br>±0.064 | 0.050<br>±0.056  | 0.047<br>±0.040 | 0.081<br>±0.049 | 0.100<br>±0.053  | 0.169<br>±0.062 | 0.256<br>±0.051  | 0.016<br>±0.027 | 0.153<br>±0.036   | 0.050<br>±0.051   | 0.312<br>± 0.029  | 0.100<br>±0.070   | 0.253<br>±0.073   | 0.037<br>±0.041   |                 |
| Acc.2          |                | 0.235<br>±0.055 | 0.175<br>±0.050 | 0.200<br>±0.064 | 0.330<br>±0.027  | 0.150<br>±0.073  | 0.384<br>± 0.051 | 0.247<br>±0.067 | 0.222<br>±0.079 | 0.069<br>±0.066  | 0.075<br>±0.057 | 0.159<br>±0.046 | 0.222<br>±0.058  | 0.244<br>±0.070 | 0.353<br>±0.077  | 0.028<br>±0.039 | 0.237<br>±0.062   | 0.097<br>±0.061   | 0.409<br>± 0.079  | 0.144<br>±0.082   | 0.350<br>±0.091   | 0.091<br>±0.074   |                 |
| Subject31_sync |                | κ               | 0.205<br>±0.063 | 0.169<br>±0.072 | 0.169<br>±0.078  | 0.205<br>±0.041  | 0.087<br>±0.076  | 0.087<br>±0.074 | 0.056<br>±0.028 | 0.118<br>±0.014  | 0.010<br>±0.014 | 0.046<br>±0.033 | -0.005<br>±0.028 | 0.062<br>±0.053 | 0.159<br>±0.061  | 0.200<br>±0.142 | -0.015<br>±0.014  | 0.215<br>±0.088   | 0.000<br>±0.026   | 0.323<br>± 0.078  | 0.041<br>±0.029   | 0.292<br>± 0.094  | 0.036<br>±0.023 |
|                | AUC            | 0.817<br>±0.056 | 0.759<br>±0.040 | 0.775<br>±0.031 | 0.827<br>± 0.046 | 0.691<br>±0.108  | 0.641<br>±0.032  | 0.707<br>±0.074 | 0.759<br>±0.051 | 0.578<br>±0.033  | 0.653<br>±0.039 | 0.567<br>±0.057 | 0.668<br>±0.028  | 0.774<br>±0.051 | 0.770<br>±0.074  | 0.502<br>±0.068 | 0.722<br>±0.050   | 0.626<br>±0.084   | 0.844<br>± 0.036  | 0.619<br>±0.074   | 0.812<br>±0.052   | 0.674<br>±0.084   |                 |
|                | BAcc           | 0.225<br>±0.061 | 0.190<br>±0.070 | 0.190<br>±0.076 | 0.225<br>±0.040  | 0.110<br>±0.074  | 0.110<br>±0.072  | 0.080<br>±0.027 | 0.140<br>±0.014 | 0.035<br>±0.014  | 0.070<br>±0.033 | 0.020<br>±0.027 | 0.085<br>±0.052  | 0.180<br>±0.060 | 0.220<br>±0.139  | 0.010<br>±0.014 | 0.235<br>±0.086   | 0.025<br>±0.025   | 0.340<br>± 0.076  | 0.065<br>±0.029   | 0.310<br>± 0.091  | 0.060<br>±0.022   |                 |
|                | Acc.1          | 0.225<br>±0.061 | 0.190<br>±0.070 | 0.190<br>±0.076 | 0.225<br>±0.040  | 0.110<br>±0.074  | 0.106<br>±0.092  | 0.106<br>±0.050 | 0.116<br>±0.028 | 0.031<br>±0.027  | 0.081<br>±0.077 | 0.031<br>±0.054 | 0.081<br>±0.052  | 0.150<br>±0.067 | 0.269<br>±0.130  | 0.016<br>±0.027 | 0.269<br>±0.104   | 0.025<br>±0.032   | 0.362<br>± 0.127  | 0.059<br>±0.036   | 0.381<br>± 0.167  | 0.047<br>±0.029   |                 |

Continued on next page

5451  
5452  
5453  
5454  
5455  
5456  
5457  
5458  
5459  
5460  
5461  
5462  
5463  
5464  
5465  
5466  
5467  
5468  
5469  
5470  
5471  
5472  
5473  
5474  
5475  
5476  
5477  
5478  
5479  
5480  
5481  
5482  
5483

| Subject        | Metric                 | DeepConvnet      | EEGNet          | Conformer       | CTNet            | SSVEPDNN        | BIOT (f)         | BIOT (l)        | BENDR (f)        | BENDR (l)       | CBraMod (f)      | CBraMod (l)     | EEGPT (f)       | EEGPT (l)       | LaBraM (f)      | LaBraM (l)      | STEEGformer-s (f) | STEEGformer-s (l) | STEEGformer-b (f) | STEEGformer-b (l) | STEEGformer-l (f) | STEEGformer-l (l) |
|----------------|------------------------|------------------|-----------------|-----------------|------------------|-----------------|------------------|-----------------|------------------|-----------------|------------------|-----------------|-----------------|-----------------|-----------------|-----------------|-------------------|-------------------|-------------------|-------------------|-------------------|-------------------|
| Subject32_sync | Acc.2                  | 0.330<br>±0.099  | 0.280<br>±0.091 | 0.290<br>±0.068 | 0.355<br>±0.062  | 0.170<br>±0.091 | 0.222<br>±0.090  | 0.188<br>±0.093 | 0.234<br>±0.058  | 0.072<br>±0.054 | 0.178<br>±0.074  | 0.109<br>±0.049 | 0.125<br>±0.053 | 0.247<br>±0.084 | 0.384<br>±0.188 | 0.031<br>±0.029 | 0.353<br>±0.102   | 0.084<br>±0.030   | 0.475<br>± 0.098  | 0.109<br>±0.049   | 0.453<br>± 0.170  | 0.084<br>±0.036   |
|                | κ                      | 0.554<br>±0.047  | 0.421<br>±0.099 | 0.492<br>±0.066 | 0.585<br>±0.049  | 0.369<br>±0.207 | 0.636<br>±0.042  | 0.436<br>±0.060 | 0.590<br>±0.051  | 0.021<br>±0.021 | 0.087<br>±0.039  | 0.087<br>±0.034 | 0.236<br>±0.073 | 0.421<br>±0.047 | 0.656<br>±0.082 | 0.015<br>±0.023 | 0.641<br>±0.068   | 0.015<br>±0.039   | 0.677<br>± 0.084  | 0.026<br>±0.041   | 0.723<br>± 0.071  | 0.089<br>±0.039   |
|                | AUC                    | 0.982<br>± 0.008 | 0.952<br>±0.018 | 0.961<br>±0.014 | 0.983<br>± 0.004 | 0.863<br>±0.204 | 0.946<br>±0.026  | 0.975<br>±0.006 | 0.977<br>±0.015  | 0.648<br>±0.043 | 0.675<br>±0.054  | 0.775<br>±0.046 | 0.829<br>±0.042 | 0.928<br>±0.020 | 0.956<br>±0.040 | 0.574<br>±0.042 | 0.935<br>±0.011   | 0.647<br>±0.054   | 0.976<br>±0.017   | 0.690<br>±0.051   | 0.971<br>±0.021   | 0.788<br>±0.032   |
|                | BAcc                   | 0.565<br>±0.045  | 0.435<br>±0.096 | 0.505<br>±0.065 | 0.595<br>±0.048  | 0.385<br>±0.202 | 0.645<br>±0.041  | 0.450<br>±0.059 | 0.600<br>±0.050  | 0.045<br>±0.021 | 0.110<br>±0.038  | 0.110<br>±0.034 | 0.255<br>±0.072 | 0.435<br>±0.045 | 0.665<br>±0.080 | 0.040<br>±0.022 | 0.650<br>±0.066   | 0.040<br>±0.038   | 0.685<br>± 0.082  | 0.050<br>±0.040   | 0.730<br>± 0.069  | 0.088<br>±0.038   |
|                | Acc.1                  | 0.565<br>±0.045  | 0.435<br>±0.096 | 0.505<br>±0.065 | 0.595<br>±0.048  | 0.385<br>±0.202 | 0.722<br>± 0.085 | 0.441<br>±0.084 | 0.609<br>±0.073  | 0.037<br>±0.026 | 0.134<br>±0.056  | 0.131<br>±0.082 | 0.300<br>±0.045 | 0.516<br>±0.077 | 0.697<br>±0.079 | 0.053<br>±0.036 | 0.669<br>±0.070   | 0.025<br>±0.024   | 0.709<br>±0.055   | 0.050<br>±0.045   | 0.719<br>± 0.048  | 0.088<br>±0.038   |
|                | Acc.2                  | 0.785<br>±0.074  | 0.610<br>±0.122 | 0.675<br>±0.047 | 0.795<br>±0.054  | 0.530<br>±0.272 | 0.900<br>± 0.081 | 0.725<br>±0.063 | 0.803<br>±0.079  | 0.075<br>±0.023 | 0.216<br>±0.061  | 0.250<br>±0.037 | 0.422<br>±0.105 | 0.650<br>±0.041 | 0.872<br>±0.079 | 0.125<br>±0.038 | 0.828<br>±0.040   | 0.059<br>±0.023   | 0.878<br>±0.039   | 0.116<br>±0.050   | 0.909<br>± 0.042  | 0.182<br>±0.062   |
|                | Subject33_sync         | κ                | 0.390<br>±0.088 | 0.262<br>±0.053 | 0.277<br>±0.071  | 0.421<br>±0.067 | 0.169<br>±0.097  | 0.318<br>±0.126 | 0.169<br>±0.056  | 0.426<br>±0.084 | 0.021<br>±0.042  | 0.077<br>±0.031 | 0.041<br>±0.029 | 0.077<br>±0.065 | 0.195<br>±0.074 | 0.410<br>±0.077 | -0.010<br>±0.023  | 0.487<br>±0.098   | 0.015<br>±0.014   | 0.651<br>± 0.069  | 0.026<br>±0.018   | 0.631<br>± 0.053  |
| AUC            |                        | 0.933<br>±0.017  | 0.911<br>±0.018 | 0.879<br>±0.033 | 0.946<br>±0.007  | 0.791<br>±0.163 | 0.826<br>±0.041  | 0.884<br>±0.027 | 0.923<br>±0.023  | 0.672<br>±0.020 | 0.691<br>±0.045  | 0.726<br>±0.050 | 0.685<br>±0.044 | 0.859<br>±0.023 | 0.901<br>±0.022 | 0.508<br>±0.010 | 0.878<br>±0.030   | 0.677<br>±0.046   | 0.972<br>± 0.018  | 0.661<br>±0.033   | 0.948<br>± 0.022  | 0.706<br>±0.021   |
| BAcc           |                        | 0.405<br>±0.086  | 0.280<br>±0.051 | 0.295<br>±0.069 | 0.435<br>±0.065  | 0.190<br>±0.095 | 0.335<br>±0.123  | 0.190<br>±0.055 | 0.440<br>±0.082  | 0.045<br>±0.041 | 0.100<br>±0.031  | 0.065<br>±0.029 | 0.100<br>±0.064 | 0.215<br>±0.072 | 0.425<br>±0.075 | 0.015<br>±0.022 | 0.500<br>±0.095   | 0.040<br>±0.014   | 0.660<br>± 0.068  | 0.050<br>±0.018   | 0.640<br>± 0.052  | 0.045<br>±0.011   |
| Acc.1          |                        | 0.405<br>±0.086  | 0.280<br>±0.051 | 0.295<br>±0.069 | 0.435<br>±0.065  | 0.190<br>±0.095 | 0.303<br>±0.105  | 0.156<br>±0.061 | 0.425<br>±0.113  | 0.056<br>±0.067 | 0.138<br>±0.066  | 0.116<br>±0.042 | 0.109<br>±0.086 | 0.200<br>±0.039 | 0.453<br>±0.101 | 0.009<br>±0.014 | 0.500<br>±0.089   | 0.025<br>±0.009   | 0.637<br>± 0.082  | 0.031<br>±0.011   | 0.681<br>± 0.081  | 0.037<br>±0.024   |
| Acc.2          |                        | 0.585<br>±0.080  | 0.475<br>±0.064 | 0.425<br>±0.064 | 0.630<br>±0.033  | 0.300<br>±0.147 | 0.469<br>±0.102  | 0.359<br>±0.090 | 0.613<br>±0.069  | 0.100<br>±0.039 | 0.247<br>±0.058  | 0.244<br>±0.068 | 0.203<br>±0.102 | 0.334<br>±0.045 | 0.631<br>±0.082 | 0.037<br>±0.036 | 0.644<br>±0.078   | 0.062<br>±0.029   | 0.778<br>± 0.051  | 0.059<br>±0.013   | 0.791<br>± 0.074  | 0.081<br>±0.020   |
| Subject34_sync |                        | κ                | 0.195<br>±0.094 | 0.149<br>±0.033 | 0.097<br>±0.028  | 0.179<br>±0.063 | 0.041<br>±0.047  | 0.128<br>±0.065 | 0.077<br>±0.041  | 0.338<br>±0.061 | -0.005<br>±0.021 | 0.072<br>±0.046 | 0.041<br>±0.029 | 0.113<br>±0.090 | 0.154<br>±0.026 | 0.246<br>±0.111 | 0.021<br>±0.021   | 0.272<br>±0.067   | 0.010<br>±0.014   | 0.390<br>± 0.064  | -0.000<br>±0.018  | 0.349<br>± 0.043  |
|                | AUC                    | 0.844<br>±0.027  | 0.824<br>±0.023 | 0.769<br>±0.022 | 0.851<br>±0.034  | 0.689<br>±0.112 | 0.689<br>±0.043  | 0.715<br>±0.032 | 0.877<br>± 0.023 | 0.595<br>±0.050 | 0.638<br>±0.038  | 0.657<br>±0.050 | 0.671<br>±0.036 | 0.810<br>±0.038 | 0.815<br>±0.009 | 0.505<br>±0.055 | 0.780<br>±0.019   | 0.564<br>±0.059   | 0.900<br>± 0.030  | 0.571<br>±0.019   | 0.862<br>±0.035   | 0.608<br>±0.038   |
|                | BAcc                   | 0.215<br>±0.091  | 0.170<br>±0.033 | 0.120<br>±0.027 | 0.200<br>±0.061  | 0.065<br>±0.045 | 0.150<br>±0.064  | 0.100<br>±0.040 | 0.355<br>±0.060  | 0.020<br>±0.021 | 0.095<br>±0.045  | 0.065<br>±0.029 | 0.135<br>±0.088 | 0.175<br>±0.025 | 0.265<br>±0.108 | 0.045<br>±0.021 | 0.290<br>±0.065   | 0.035<br>±0.014   | 0.405<br>± 0.062  | 0.025<br>±0.018   | 0.365<br>± 0.042  | 0.045<br>±0.033   |
|                | Acc.1                  | 0.215<br>±0.091  | 0.170<br>±0.033 | 0.120<br>±0.027 | 0.200<br>±0.061  | 0.065<br>±0.045 | 0.169<br>±0.074  | 0.119<br>±0.074 | 0.419<br>± 0.118 | 0.013<br>±0.013 | 0.106<br>±0.055  | 0.087<br>±0.060 | 0.141<br>±0.088 | 0.184<br>±0.056 | 0.325<br>±0.154 | 0.028<br>±0.013 | 0.331<br>±0.077   | 0.022<br>±0.009   | 0.384<br>±0.099   | 0.016<br>±0.011   | 0.397<br>± 0.063  | 0.028<br>±0.020   |
|                | Continued on next page |                  |                 |                 |                  |                 |                  |                 |                  |                 |                  |                 |                 |                 |                 |                 |                   |                   |                   |                   |                   |                   |

5484  
5485  
5486  
5487  
5488  
5489  
5490  
5491  
5492  
5493  
5494  
5495  
5496  
5497  
5498  
5499  
5500  
5501  
5502  
5503  
5504  
5505  
5506  
5507  
5508  
5509  
5510  
5511  
5512  
5513  
5514  
5515  
5516

| Subject                | Metric        | DeepConvnet     | EEGNet          | Conformer       | CTNet           | SSVEPDNN        | BIOT (f)        | BIOT (l)        | BENDR (f)       | BENDR (l)       | CBraMod (f)     | CBraMod (l)     | EEGPT (f)       | EEGPT (l)       | LaBraM (f)      | LaBraM (l)      | STEEGformer-s (f) | STEEGformer-s (l) | STEEGformer-b (f) | STEEGformer-b (l) | STEEGformer-l (f) | STEEGformer-l (l) | Under Review     |
|------------------------|---------------|-----------------|-----------------|-----------------|-----------------|-----------------|-----------------|-----------------|-----------------|-----------------|-----------------|-----------------|-----------------|-----------------|-----------------|-----------------|-------------------|-------------------|-------------------|-------------------|-------------------|-------------------|------------------|
| Subject35_sync         | Acc.2         | 0.335<br>±0.080 | 0.260<br>±0.058 | 0.230<br>±0.069 | 0.400<br>±0.053 | 0.150<br>±0.079 | 0.228<br>±0.066 | 0.209<br>±0.097 | 0.512<br>±0.114 | 0.037<br>±0.018 | 0.163<br>±0.058 | 0.163<br>±0.064 | 0.184<br>±0.089 | 0.250<br>±0.107 | 0.506<br>±0.155 | 0.044<br>±0.020 | 0.434<br>±0.083   | 0.041<br>±0.014   | 0.569<br>±0.085   | 0.044<br>±0.013   | 0.559<br>±0.075   | 0.004<br>±0.020   |                  |
|                        | κ             | 0.200<br>±0.053 | 0.169<br>±0.072 | 0.159<br>±0.061 | 0.226<br>±0.056 | 0.185<br>±0.114 | 0.205<br>±0.075 | 0.108<br>±0.056 | 0.210<br>±0.058 | 0.062<br>±0.053 | 0.087<br>±0.043 | 0.031<br>±0.033 | 0.077<br>±0.048 | 0.154<br>±0.051 | 0.251<br>±0.140 | 0.000<br>±0.026 | 0.144<br>±0.014   | 0.010<br>±0.029   | 0.323<br>±0.092   | 0.026<br>±0.031   | 0.323<br>±0.050   | 0.004<br>±0.028   |                  |
|                        | AUC           | 0.874<br>±0.023 | 0.855<br>±0.024 | 0.852<br>±0.017 | 0.886<br>±0.018 | 0.787<br>±0.163 | 0.761<br>±0.067 | 0.794<br>±0.022 | 0.813<br>±0.037 | 0.704<br>±0.039 | 0.683<br>±0.050 | 0.729<br>±0.025 | 0.668<br>±0.048 | 0.850<br>±0.017 | 0.774<br>±0.060 | 0.526<br>±0.086 | 0.729<br>±0.048   | 0.594<br>±0.058   | 0.861<br>±0.054   | 0.599<br>±0.038   | 0.839<br>±0.054   | 0.663<br>±0.061   |                  |
|                        | BAcc          | 0.220<br>±0.051 | 0.190<br>±0.070 | 0.180<br>±0.060 | 0.245<br>±0.054 | 0.205<br>±0.111 | 0.225<br>±0.073 | 0.130<br>±0.054 | 0.230<br>±0.057 | 0.085<br>±0.052 | 0.110<br>±0.042 | 0.055<br>±0.033 | 0.100<br>±0.047 | 0.175<br>±0.050 | 0.270<br>±0.136 | 0.025<br>±0.025 | 0.165<br>±0.014   | 0.035<br>±0.029   | 0.340<br>±0.089   | 0.050<br>±0.031   | 0.340<br>±0.049   | 0.000<br>±0.027   |                  |
|                        | Acc.1         | 0.220<br>±0.051 | 0.190<br>±0.070 | 0.180<br>±0.060 | 0.245<br>±0.054 | 0.205<br>±0.111 | 0.244<br>±0.106 | 0.138<br>±0.064 | 0.228<br>±0.092 | 0.109<br>±0.062 | 0.134<br>±0.066 | 0.109<br>±0.082 | 0.119<br>±0.065 | 0.222<br>±0.049 | 0.309<br>±0.162 | 0.025<br>±0.026 | 0.234<br>±0.043   | 0.022<br>±0.018   | 0.353<br>±0.114   | 0.069<br>±0.051   | 0.409<br>±0.064   | 0.004<br>±0.023   |                  |
|                        | Acc.2         | 0.370<br>±0.060 | 0.315<br>±0.110 | 0.285<br>±0.080 | 0.410<br>±0.029 | 0.335<br>±0.165 | 0.338<br>±0.163 | 0.253<br>±0.063 | 0.356<br>±0.113 | 0.184<br>±0.081 | 0.225<br>±0.042 | 0.200<br>±0.079 | 0.188<br>±0.059 | 0.409<br>±0.047 | 0.403<br>±0.186 | 0.066<br>±0.039 | 0.306<br>±0.039   | 0.087<br>±0.039   | 0.466<br>±0.104   | 0.128<br>±0.065   | 0.572<br>±0.126   | 0.004<br>±0.028   |                  |
|                        | Subject3_sync | κ               | 0.497<br>±0.086 | 0.359<br>±0.048 | 0.405<br>±0.049 | 0.518<br>±0.049 | 0.287<br>±0.180 | 0.610<br>±0.108 | 0.513<br>±0.112 | 0.600<br>±0.136 | 0.041<br>±0.047 | 0.062<br>±0.059 | 0.077<br>±0.041 | 0.349<br>±0.113 | 0.333<br>±0.073 | 0.682<br>±0.080 | 0.010<br>±0.023   | 0.579<br>±0.104   | 0.046<br>±0.038   | 0.677<br>±0.108   | 0.026<br>±0.036   | 0.651<br>±0.088   | 0.004<br>±0.029  |
| AUC                    |               | 0.972<br>±0.010 | 0.960<br>±0.010 | 0.951<br>±0.018 | 0.976<br>±0.007 | 0.852<br>±0.197 | 0.949<br>±0.026 | 0.971<br>±0.018 | 0.965<br>±0.015 | 0.623<br>±0.026 | 0.677<br>±0.047 | 0.736<br>±0.047 | 0.886<br>±0.047 | 0.931<br>±0.032 | 0.966<br>±0.024 | 0.551<br>±0.029 | 0.924<br>±0.037   | 0.625<br>±0.057   | 0.969<br>±0.022   | 0.659<br>±0.058   | 0.969<br>±0.021   | 0.751<br>±0.047   |                  |
| BAcc                   |               | 0.510<br>±0.084 | 0.375<br>±0.047 | 0.420<br>±0.048 | 0.530<br>±0.048 | 0.305<br>±0.175 | 0.620<br>±0.105 | 0.525<br>±0.109 | 0.610<br>±0.133 | 0.065<br>±0.045 | 0.085<br>±0.058 | 0.100<br>±0.040 | 0.365<br>±0.110 | 0.350<br>±0.071 | 0.690<br>±0.078 | 0.035<br>±0.022 | 0.590<br>±0.101   | 0.070<br>±0.037   | 0.685<br>±0.105   | 0.050<br>±0.035   | 0.660<br>±0.086   | 0.095<br>±0.048   |                  |
| Acc.1                  |               | 0.510<br>±0.084 | 0.375<br>±0.047 | 0.420<br>±0.048 | 0.530<br>±0.048 | 0.305<br>±0.175 | 0.669<br>±0.130 | 0.534<br>±0.175 | 0.634<br>±0.111 | 0.069<br>±0.061 | 0.062<br>±0.040 | 0.156<br>±0.056 | 0.425<br>±0.122 | 0.369<br>±0.036 | 0.694<br>±0.095 | 0.022<br>±0.014 | 0.594<br>±0.106   | 0.081<br>±0.070   | 0.681<br>±0.095   | 0.059<br>±0.058   | 0.656<br>±0.166   | 0.097<br>±0.068   |                  |
| Acc.2                  |               | 0.725<br>±0.090 | 0.630<br>±0.057 | 0.615<br>±0.022 | 0.750<br>±0.053 | 0.480<br>±0.255 | 0.831<br>±0.084 | 0.778<br>±0.140 | 0.784<br>±0.064 | 0.122<br>±0.046 | 0.184<br>±0.056 | 0.225<br>±0.084 | 0.541<br>±0.160 | 0.588<br>±0.051 | 0.875<br>±0.071 | 0.056<br>±0.036 | 0.831<br>±0.103   | 0.128<br>±0.076   | 0.794<br>±0.074   | 0.122<br>±0.099   | 0.853<br>±0.087   | 0.209<br>±0.072   |                  |
| Subject4_sync          |               | κ               | 0.113<br>±0.064 | 0.103<br>±0.065 | 0.108<br>±0.042 | 0.164<br>±0.053 | 0.036<br>±0.034 | 0.221<br>±0.069 | 0.097<br>±0.064 | 0.062<br>±0.053 | 0.000<br>±0.031 | 0.021<br>±0.033 | 0.026<br>±0.031 | 0.041<br>±0.023 | 0.077<br>±0.041 | 0.185<br>±0.061 | -0.005<br>±0.021  | 0.154<br>±0.065   | 0.000<br>±0.036   | 0.277<br>±0.135   | -0.015<br>±0.023  | 0.297<br>±0.059   | -0.010<br>±0.014 |
|                        |               | AUC             | 0.756<br>±0.017 | 0.724<br>±0.030 | 0.697<br>±0.043 | 0.787<br>±0.011 | 0.619<br>±0.074 | 0.743<br>±0.076 | 0.809<br>±0.037 | 0.710<br>±0.055 | 0.512<br>±0.041 | 0.587<br>±0.024 | 0.668<br>±0.017 | 0.610<br>±0.035 | 0.728<br>±0.049 | 0.765<br>±0.034 | 0.509<br>±0.033   | 0.658<br>±0.048   | 0.534<br>±0.023   | 0.823<br>±0.047   | 0.517<br>±0.021   | 0.800<br>±0.037   | 0.569<br>±0.022  |
|                        | BAcc          | 0.135<br>±0.063 | 0.125<br>±0.064 | 0.130<br>±0.041 | 0.185<br>±0.052 | 0.060<br>±0.034 | 0.240<br>±0.068 | 0.120<br>±0.062 | 0.085<br>±0.052 | 0.025<br>±0.031 | 0.045<br>±0.033 | 0.050<br>±0.031 | 0.065<br>±0.022 | 0.100<br>±0.040 | 0.205<br>±0.060 | 0.020<br>±0.021 | 0.175<br>±0.064   | 0.025<br>±0.035   | 0.295<br>±0.132   | 0.010<br>±0.022   | 0.315<br>±0.058   | 0.015<br>±0.014   |                  |
|                        | Acc.1         | 0.135<br>±0.063 | 0.125<br>±0.064 | 0.130<br>±0.041 | 0.185<br>±0.052 | 0.060<br>±0.034 | 0.291<br>±0.087 | 0.122<br>±0.064 | 0.091<br>±0.068 | 0.034<br>±0.060 | 0.056<br>±0.045 | 0.059<br>±0.060 | 0.078<br>±0.029 | 0.119<br>±0.063 | 0.241<br>±0.107 | 0.022<br>±0.026 | 0.203<br>±0.125   | 0.025<br>±0.041   | 0.306<br>±0.139   | 0.006<br>±0.014   | 0.300<br>±0.098   | 0.019<br>±0.026   |                  |
|                        |               |                 |                 |                 |                 |                 |                 |                 |                 |                 |                 |                 |                 |                 |                 |                 |                   |                   |                   |                   |                   |                   |                  |
| Continued on next page |               |                 |                 |                 |                 |                 |                 |                 |                 |                 |                 |                 |                 |                 |                 |                 |                   |                   |                   |                   |                   |                   |                  |

Continued on next page

| Subject                | Metric        | DeepConvnet      | EEGNet          | Conformer       | CTNet            | SSVEPDNN        | BIOT (f)        | BIOT (l)        | BENDR (f)       | BENDR (l)       | CBraMod (f)     | CBraMod (l)     | EEGPT (f)       | EEGPT (l)       | LaBraM (f)       | LaBraM (l)      | STEEGformer-s (f) | STEEGformer-s (l) | STEEGformer-h (f) | STEEGformer-h (l) | STEEGformer-l (f) | STEEGformer-l (l) | Under Review    |
|------------------------|---------------|------------------|-----------------|-----------------|------------------|-----------------|-----------------|-----------------|-----------------|-----------------|-----------------|-----------------|-----------------|-----------------|------------------|-----------------|-------------------|-------------------|-------------------|-------------------|-------------------|-------------------|-----------------|
| Subject5_sync          | Acc.2         | 0.240<br>±0.038  | 0.200<br>±0.066 | 0.190<br>±0.042 | 0.310<br>±0.068  | 0.125<br>±0.085 | 0.375<br>±0.097 | 0.316<br>±0.079 | 0.175<br>±0.097 | 0.056<br>±0.069 | 0.116<br>±0.051 | 0.087<br>±0.051 | 0.156<br>±0.066 | 0.209<br>±0.069 | 0.353<br>±0.092  | 0.044<br>±0.043 | 0.269<br>±0.092   | 0.053<br>±0.044   | 0.447<br>± 0.122  | 0.053<br>±0.039   | 0.412<br>± 0.089  | 0.036<br>±0.052   |                 |
|                        | κ             | 0.595<br>±0.028  | 0.492<br>±0.046 | 0.451<br>±0.034 | 0.605<br>±0.014  | 0.338<br>±0.201 | 0.697<br>±0.069 | 0.513<br>±0.054 | 0.682<br>±0.090 | 0.046<br>±0.046 | 0.103<br>±0.070 | 0.062<br>±0.039 | 0.451<br>±0.102 | 0.451<br>±0.029 | 0.723<br>± 0.046 | 0.041<br>±0.023 | 0.667<br>±0.065   | 0.046<br>±0.021   | 0.703<br>±0.056   | 0.046<br>±0.021   | 0.759<br>± 0.029  | 0.036<br>±0.046   |                 |
|                        | AUC           | 0.984<br>±0.004  | 0.971<br>±0.009 | 0.966<br>±0.005 | 0.988<br>± 0.004 | 0.866<br>±0.205 | 0.961<br>±0.015 | 0.980<br>±0.010 | 0.977<br>±0.014 | 0.674<br>±0.014 | 0.733<br>±0.032 | 0.764<br>±0.034 | 0.907<br>±0.019 | 0.964<br>±0.012 | 0.981<br>±0.014  | 0.575<br>±0.039 | 0.953<br>±0.031   | 0.637<br>±0.046   | 0.985<br>± 0.004  | 0.648<br>±0.042   | 0.982<br>±0.008   | 0.777<br>±0.045   |                 |
|                        | BAcc          | 0.605<br>±0.027  | 0.505<br>±0.045 | 0.465<br>±0.034 | 0.615<br>±0.014  | 0.355<br>±0.196 | 0.705<br>±0.067 | 0.525<br>±0.053 | 0.690<br>±0.088 | 0.070<br>±0.045 | 0.125<br>±0.068 | 0.085<br>±0.038 | 0.465<br>±0.099 | 0.465<br>±0.029 | 0.730<br>± 0.045 | 0.065<br>±0.022 | 0.675<br>±0.064   | 0.070<br>±0.021   | 0.710<br>±0.055   | 0.070<br>±0.021   | 0.765<br>± 0.029  | 0.036<br>±0.045   |                 |
|                        | Acc.1         | 0.605<br>±0.027  | 0.505<br>±0.045 | 0.465<br>±0.034 | 0.615<br>±0.014  | 0.355<br>±0.196 | 0.731<br>±0.066 | 0.562<br>±0.115 | 0.681<br>±0.100 | 0.062<br>±0.044 | 0.144<br>±0.076 | 0.125<br>±0.061 | 0.516<br>±0.098 | 0.525<br>±0.066 | 0.766<br>± 0.072 | 0.050<br>±0.028 | 0.684<br>±0.084   | 0.059<br>±0.046   | 0.744<br>±0.075   | 0.091<br>±0.045   | 0.797<br>± 0.037  | 0.038<br>±0.054   |                 |
|                        | Acc.2         | 0.785<br>±0.034  | 0.745<br>±0.045 | 0.670<br>±0.027 | 0.835<br>±0.014  | 0.540<br>±0.281 | 0.856<br>±0.060 | 0.816<br>±0.134 | 0.831<br>±0.051 | 0.094<br>±0.059 | 0.294<br>±0.112 | 0.203<br>±0.088 | 0.641<br>±0.059 | 0.716<br>±0.077 | 0.909<br>± 0.036 | 0.091<br>±0.052 | 0.825<br>±0.081   | 0.150<br>±0.045   | 0.878<br>±0.084   | 0.144<br>±0.043   | 0.900<br>± 0.049  | 0.159<br>±0.049   |                 |
|                        | Subject6_sync | κ                | 0.405<br>±0.056 | 0.256<br>±0.070 | 0.328<br>±0.056  | 0.395<br>±0.078 | 0.190<br>±0.117 | 0.385<br>±0.041 | 0.251<br>±0.071 | 0.421<br>±0.099 | 0.010<br>±0.014 | 0.067<br>±0.043 | 0.072<br>±0.046 | 0.210<br>±0.076 | 0.246<br>±0.074  | 0.549<br>±0.086 | 0.036<br>±0.053   | 0.554<br>±0.029   | 0.015<br>±0.014   | 0.600<br>± 0.086  | 0.036<br>±0.034   | 0.703<br>± 0.039  | 0.036<br>±0.051 |
| AUC                    |               | 0.962<br>±0.010  | 0.932<br>±0.025 | 0.924<br>±0.011 | 0.968<br>± 0.008 | 0.782<br>±0.158 | 0.854<br>±0.022 | 0.923<br>±0.012 | 0.918<br>±0.014 | 0.522<br>±0.035 | 0.656<br>±0.031 | 0.696<br>±0.043 | 0.777<br>±0.051 | 0.866<br>±0.021 | 0.943<br>±0.021  | 0.531<br>±0.026 | 0.924<br>±0.023   | 0.669<br>±0.024   | 0.967<br>±0.009   | 0.636<br>±0.049   | 0.967<br>± 0.011  | 0.693<br>±0.025   |                 |
| BAcc                   |               | 0.420<br>±0.054  | 0.275<br>±0.068 | 0.345<br>±0.054 | 0.410<br>±0.076  | 0.210<br>±0.114 | 0.400<br>±0.040 | 0.270<br>±0.069 | 0.435<br>±0.096 | 0.035<br>±0.014 | 0.090<br>±0.042 | 0.095<br>±0.045 | 0.230<br>±0.074 | 0.265<br>±0.072 | 0.560<br>±0.084  | 0.060<br>±0.052 | 0.565<br>±0.029   | 0.040<br>±0.014   | 0.610<br>± 0.084  | 0.060<br>±0.034   | 0.710<br>± 0.038  | 0.070<br>±0.021   |                 |
| Acc.1                  |               | 0.420<br>±0.054  | 0.275<br>±0.068 | 0.345<br>±0.054 | 0.410<br>±0.076  | 0.210<br>±0.114 | 0.372<br>±0.040 | 0.309<br>±0.137 | 0.366<br>±0.063 | 0.041<br>±0.028 | 0.122<br>±0.036 | 0.144<br>±0.072 | 0.237<br>±0.124 | 0.269<br>±0.094 | 0.603<br>±0.129  | 0.037<br>±0.032 | 0.569<br>±0.050   | 0.025<br>±0.009   | 0.606<br>± 0.058  | 0.037<br>±0.021   | 0.706<br>± 0.074  | 0.062<br>±0.037   |                 |
| Acc.2                  |               | 0.635<br>±0.065  | 0.460<br>±0.091 | 0.535<br>±0.074 | 0.685<br>±0.058  | 0.320<br>±0.183 | 0.547<br>±0.057 | 0.544<br>±0.118 | 0.584<br>±0.062 | 0.087<br>±0.034 | 0.194<br>±0.045 | 0.219<br>±0.112 | 0.347<br>±0.127 | 0.397<br>±0.102 | 0.756<br>±0.100  | 0.062<br>±0.053 | 0.725<br>±0.093   | 0.069<br>±0.045   | 0.787<br>± 0.036  | 0.069<br>±0.032   | 0.863<br>± 0.071  | 0.097<br>±0.072   |                 |
| Subject7_sync          | κ             | 0.328<br>±0.102  | 0.200<br>±0.078 | 0.313<br>±0.090 | 0.390<br>±0.086  | 0.113<br>±0.074 | 0.210<br>±0.090 | 0.241<br>±0.043 | 0.333<br>±0.070 | 0.010<br>±0.029 | 0.097<br>±0.046 | 0.062<br>±0.050 | 0.123<br>±0.046 | 0.195<br>±0.043 | 0.405<br>±0.105  | 0.041<br>±0.023 | 0.323<br>±0.059   | 0.005<br>±0.021   | 0.462<br>± 0.118  | 0.026<br>±0.018   | 0.441<br>± 0.147  | 0.015<br>±0.014   |                 |
|                        | AUC           | 0.921<br>± 0.035 | 0.864<br>±0.043 | 0.894<br>±0.042 | 0.935<br>± 0.031 | 0.767<br>±0.153 | 0.800<br>±0.061 | 0.894<br>±0.019 | 0.862<br>±0.050 | 0.601<br>±0.034 | 0.715<br>±0.048 | 0.714<br>±0.025 | 0.703<br>±0.070 | 0.843<br>±0.036 | 0.863<br>±0.066  | 0.597<br>±0.052 | 0.797<br>±0.046   | 0.656<br>±0.033   | 0.920<br>±0.019   | 0.623<br>±0.023   | 0.896<br>±0.055   | 0.705<br>±0.032   |                 |
|                        | BAcc          | 0.345<br>±0.099  | 0.220<br>±0.076 | 0.330<br>±0.087 | 0.405<br>±0.084  | 0.135<br>±0.072 | 0.230<br>±0.087 | 0.260<br>±0.042 | 0.350<br>±0.068 | 0.035<br>±0.029 | 0.120<br>±0.045 | 0.085<br>±0.049 | 0.145<br>±0.045 | 0.215<br>±0.042 | 0.420<br>±0.102  | 0.065<br>±0.022 | 0.340<br>±0.058   | 0.030<br>±0.021   | 0.475<br>± 0.115  | 0.050<br>±0.018   | 0.455<br>± 0.143  | 0.040<br>±0.014   |                 |
|                        | Acc.1         | 0.345<br>±0.099  | 0.220<br>±0.076 | 0.330<br>±0.087 | 0.405<br>±0.084  | 0.135<br>±0.072 | 0.247<br>±0.092 | 0.312<br>±0.046 | 0.350<br>±0.048 | 0.041<br>±0.042 | 0.159<br>±0.058 | 0.109<br>±0.080 | 0.138<br>±0.051 | 0.275<br>±0.066 | 0.459<br>±0.128  | 0.078<br>±0.040 | 0.334<br>±0.104   | 0.019<br>±0.013   | 0.522<br>± 0.143  | 0.087<br>±0.059   | 0.472<br>± 0.195  | 0.034<br>±0.026   |                 |
| Continued on next page |               |                  |                 |                 |                  |                 |                 |                 |                 |                 |                 |                 |                 |                 |                  |                 |                   |                   |                   |                   |                   |                   |                 |

Continued on next page

| Subject       | Metric        | DeepConvnet     | EEGNet          | Conformer       | CTNet            | SSVEPDNN        | BIOT (f)        | BIOT (l)        | BENDR (f)       | BENDR (l)        | CBraMod (f)     | CBraMod (l)     | EEGPT (f)       | EEGPT (l)       | LaBraM (f)       | LaBraM (l)      | STEEGformer-s (f) | STEEGformer-s (l) | STEEGformer-h (f) | STEEGformer-h (l) | STEEGformer-l (f) | STEEGformer-l (l) | Unlabeled       |
|---------------|---------------|-----------------|-----------------|-----------------|------------------|-----------------|-----------------|-----------------|-----------------|------------------|-----------------|-----------------|-----------------|-----------------|------------------|-----------------|-------------------|-------------------|-------------------|-------------------|-------------------|-------------------|-----------------|
| Subject8_sync | Acc.2         | 0.530<br>±0.116 | 0.380<br>±0.062 | 0.460<br>±0.049 | 0.620<br>±0.076  | 0.240<br>±0.128 | 0.481<br>±0.051 | 0.478<br>±0.041 | 0.481<br>±0.062 | 0.119<br>±0.038  | 0.244<br>±0.059 | 0.181<br>±0.067 | 0.191<br>±0.076 | 0.409<br>±0.049 | 0.591<br>±0.133  | 0.125<br>±0.083 | 0.484<br>±0.100   | 0.047<br>±0.031   | 0.659<br>± 0.109  | 0.128<br>±0.028   | 0.641<br>± 0.155  | 0.039<br>±0.041   |                 |
|               | κ             | 0.297<br>±0.090 | 0.231<br>±0.048 | 0.195<br>±0.090 | 0.282<br>±0.107  | 0.087<br>±0.050 | 0.256<br>±0.065 | 0.226<br>±0.049 | 0.338<br>±0.073 | -0.010<br>±0.023 | 0.026<br>±0.026 | 0.000<br>±0.044 | 0.113<br>±0.034 | 0.174<br>±0.049 | 0.354<br>±0.090  | 0.021<br>±0.021 | 0.344<br>±0.029   | 0.005<br>±0.033   | 0.415<br>± 0.073  | 0.015<br>±0.029   | 0.421<br>± 0.067  | 0.035<br>±0.041   |                 |
|               | AUC           | 0.903<br>±0.027 | 0.873<br>±0.023 | 0.859<br>±0.015 | 0.909<br>± 0.019 | 0.743<br>±0.138 | 0.756<br>±0.043 | 0.879<br>±0.019 | 0.908<br>±0.031 | 0.546<br>±0.024  | 0.602<br>±0.068 | 0.649<br>±0.053 | 0.732<br>±0.061 | 0.841<br>±0.030 | 0.842<br>±0.044  | 0.553<br>±0.037 | 0.821<br>±0.026   | 0.629<br>±0.035   | 0.930<br>± 0.003  | 0.598<br>±0.067   | 0.872<br>±0.040   | 0.600<br>±0.041   |                 |
|               | BAcc          | 0.315<br>±0.088 | 0.250<br>±0.047 | 0.215<br>±0.088 | 0.300<br>±0.105  | 0.110<br>±0.049 | 0.275<br>±0.064 | 0.245<br>±0.048 | 0.355<br>±0.072 | 0.015<br>±0.022  | 0.050<br>±0.025 | 0.025<br>±0.043 | 0.135<br>±0.034 | 0.195<br>±0.048 | 0.370<br>±0.087  | 0.045<br>±0.021 | 0.360<br>±0.029   | 0.030<br>±0.033   | 0.430<br>± 0.072  | 0.040<br>±0.029   | 0.435<br>± 0.065  | 0.030<br>±0.040   |                 |
|               | Acc.1         | 0.315<br>±0.088 | 0.250<br>±0.047 | 0.215<br>±0.088 | 0.300<br>±0.105  | 0.110<br>±0.049 | 0.294<br>±0.047 | 0.247<br>±0.030 | 0.391<br>±0.095 | 0.009<br>±0.014  | 0.059<br>±0.052 | 0.025<br>±0.048 | 0.188<br>±0.074 | 0.225<br>±0.069 | 0.438<br>±0.153  | 0.037<br>±0.032 | 0.441<br>±0.098   | 0.028<br>±0.039   | 0.466<br>± 0.116  | 0.025<br>±0.018   | 0.487<br>± 0.077  | 0.039<br>±0.042   |                 |
|               | Acc.2         | 0.495<br>±0.105 | 0.435<br>±0.052 | 0.340<br>±0.096 | 0.515<br>±0.082  | 0.235<br>±0.114 | 0.394<br>±0.039 | 0.438<br>±0.052 | 0.634<br>±0.090 | 0.025<br>±0.014  | 0.109<br>±0.078 | 0.072<br>±0.059 | 0.322<br>±0.068 | 0.328<br>±0.063 | 0.637<br>± 0.095 | 0.041<br>±0.030 | 0.550<br>±0.086   | 0.053<br>±0.077   | 0.631<br>±0.102   | 0.041<br>±0.018   | 0.678<br>± 0.062  | 0.118<br>±0.048   |                 |
|               | Subject9_sync | κ               | 0.379<br>±0.061 | 0.267<br>±0.080 | 0.277<br>±0.091  | 0.379<br>±0.049 | 0.282<br>±0.166 | 0.318<br>±0.082 | 0.231<br>±0.031 | 0.349<br>±0.090  | 0.046<br>±0.033 | 0.123<br>±0.042 | 0.015<br>±0.039 | 0.108<br>±0.064 | 0.185<br>±0.088  | 0.313<br>±0.097 | 0.010<br>±0.023   | 0.328<br>±0.042   | 0.010<br>±0.029   | 0.503<br>± 0.053  | 0.010<br>±0.029   | 0.492<br>± 0.064  | 0.030<br>±0.041 |
| AUC           |               | 0.929<br>±0.011 | 0.899<br>±0.024 | 0.894<br>±0.022 | 0.938<br>± 0.008 | 0.808<br>±0.173 | 0.813<br>±0.040 | 0.877<br>±0.023 | 0.897<br>±0.017 | 0.696<br>±0.044  | 0.715<br>±0.052 | 0.603<br>±0.064 | 0.683<br>±0.023 | 0.872<br>±0.016 | 0.857<br>±0.049  | 0.528<br>±0.038 | 0.812<br>±0.016   | 0.615<br>±0.053   | 0.930<br>± 0.014  | 0.606<br>±0.022   | 0.923<br>±0.040   | 0.667<br>±0.020   |                 |
| BAcc          |               | 0.395<br>±0.060 | 0.285<br>±0.078 | 0.295<br>±0.089 | 0.395<br>±0.048  | 0.300<br>±0.162 | 0.335<br>±0.080 | 0.250<br>±0.031 | 0.365<br>±0.088 | 0.070<br>±0.033  | 0.145<br>±0.041 | 0.040<br>±0.038 | 0.130<br>±0.062 | 0.205<br>±0.086 | 0.330<br>±0.094  | 0.035<br>±0.022 | 0.345<br>±0.041   | 0.035<br>±0.029   | 0.515<br>± 0.052  | 0.035<br>±0.029   | 0.505<br>± 0.062  | 0.045<br>±0.011   |                 |
| Acc.1         |               | 0.395<br>±0.060 | 0.285<br>±0.078 | 0.295<br>±0.089 | 0.395<br>±0.048  | 0.300<br>±0.162 | 0.312<br>±0.108 | 0.259<br>±0.039 | 0.378<br>±0.111 | 0.062<br>±0.044  | 0.166<br>±0.048 | 0.053<br>±0.065 | 0.166<br>±0.059 | 0.194<br>±0.075 | 0.384<br>±0.074  | 0.059<br>±0.034 | 0.366<br>±0.048   | 0.022<br>±0.018   | 0.491<br>± 0.127  | 0.050<br>±0.036   | 0.494<br>± 0.097  | 0.028<br>±0.007   |                 |
| Acc.2         |               | 0.520<br>±0.099 | 0.485<br>±0.107 | 0.440<br>±0.074 | 0.570<br>±0.041  | 0.375<br>±0.189 | 0.416<br>±0.128 | 0.400<br>±0.054 | 0.572<br>±0.128 | 0.113<br>±0.052  | 0.250<br>±0.029 | 0.097<br>±0.051 | 0.231<br>±0.062 | 0.406<br>±0.083 | 0.497<br>±0.043  | 0.084<br>±0.056 | 0.497<br>±0.084   | 0.044<br>±0.007   | 0.659<br>± 0.040  | 0.100<br>±0.061   | 0.675<br>± 0.098  | 0.072<br>±0.030   |                 |



## F.1.2 ASYNCHRONOUS DECODING RESULTS

Table 53: Average Performance Metrics Across All Subjects of Population-Trained Models

| Model (Training strategy) | $\kappa$     | AUC          | BAcc         | Acc.1        | Acc.2        |
|---------------------------|--------------|--------------|--------------|--------------|--------------|
|                           | 0.317        | 0.870        | 0.334        | 0.334        | 0.473        |
| <b>DeepConvnet</b>        | $\pm 0.197$  | $\pm 0.096$  | $\pm 0.192$  | $\pm 0.192$  | $\pm 0.233$  |
|                           | 0.260        | 0.850        | 0.278        | 0.278        | 0.411        |
| <b>EEGNet</b>             | $\pm 0.161$  | $\pm 0.095$  | $\pm 0.157$  | $\pm 0.157$  | $\pm 0.200$  |
|                           | 0.233        | 0.836        | 0.252        | 0.252        | 0.376        |
| <b>Conformer</b>          | $\pm 0.144$  | $\pm 0.091$  | $\pm 0.140$  | $\pm 0.140$  | $\pm 0.179$  |
|                           | 0.355        | <b>0.880</b> | 0.371        | 0.371        | 0.521        |
| <b>CTNet</b>              | $\pm 0.201$  | $\pm 0.102$  | $\pm 0.196$  | $\pm 0.196$  | $\pm 0.239$  |
|                           | 0.156        | 0.749        | 0.178        | 0.178        | 0.274        |
| <b>SSVEPDNN</b>           | $\pm 0.103$  | $\pm 0.077$  | $\pm 0.101$  | $\pm 0.101$  | $\pm 0.131$  |
|                           | 0.272        | 0.771        | 0.291        | 0.290        | 0.427        |
| <b>BIOT (f)</b>           | $\pm 0.192$  | $\pm 0.124$  | $\pm 0.187$  | $\pm 0.187$  | $\pm 0.240$  |
|                           | 0.213        | 0.815        | 0.232        | 0.232        | 0.383        |
| <b>BIOT (l)</b>           | $\pm 0.151$  | $\pm 0.134$  | $\pm 0.147$  | $\pm 0.146$  | $\pm 0.221$  |
|                           | 0.290        | 0.818        | 0.307        | 0.308        | 0.431        |
| <b>BENDR (f)</b>          | $\pm 0.193$  | $\pm 0.123$  | $\pm 0.189$  | $\pm 0.189$  | $\pm 0.228$  |
|                           | 0.035        | 0.658        | 0.059        | 0.059        | 0.110        |
| <b>BENDR (l)</b>          | $\pm 0.013$  | $\pm 0.040$  | $\pm 0.012$  | $\pm 0.013$  | $\pm 0.020$  |
|                           | 0.060        | 0.652        | 0.084        | 0.085        | 0.155        |
| <b>CBraMod (f)</b>        | $\pm 0.029$  | $\pm 0.047$  | $\pm 0.028$  | $\pm 0.028$  | $\pm 0.044$  |
|                           | 0.036        | 0.664        | 0.060        | 0.062        | 0.116        |
| <b>CBraMod (l)</b>        | $\pm 0.019$  | $\pm 0.049$  | $\pm 0.018$  | $\pm 0.018$  | $\pm 0.030$  |
|                           | 0.097        | 0.677        | 0.119        | 0.119        | 0.188        |
| <b>EEGPT (f)</b>          | $\pm 0.090$  | $\pm 0.086$  | $\pm 0.088$  | $\pm 0.088$  | $\pm 0.114$  |
|                           | 0.198        | 0.823        | 0.218        | 0.219        | 0.337        |
| <b>EEGPT (l)</b>          | $\pm 0.125$  | $\pm 0.086$  | $\pm 0.122$  | $\pm 0.122$  | $\pm 0.160$  |
|                           | 0.347        | 0.824        | 0.363        | 0.364        | 0.496        |
| <b>LaBraM (f)</b>         | $\pm 0.193$  | $\pm 0.103$  | $\pm 0.189$  | $\pm 0.189$  | $\pm 0.215$  |
|                           | 0.008        | 0.543        | 0.033        | 0.033        | 0.063        |
| <b>LaBraM (l)</b>         | $\pm 0.005$  | $\pm 0.021$  | $\pm 0.005$  | $\pm 0.005$  | $\pm 0.009$  |
|                           | 0.352        | 0.800        | 0.368        | 0.368        | 0.495        |
| <b>STEEGformer-s (f)</b>  | $\pm 0.196$  | $\pm 0.112$  | $\pm 0.191$  | $\pm 0.191$  | $\pm 0.218$  |
|                           | 0.017        | 0.613        | 0.042        | 0.041        | 0.080        |
| <b>STEEGformer-s (l)</b>  | $\pm 0.012$  | $\pm 0.042$  | $\pm 0.011$  | $\pm 0.011$  | $\pm 0.017$  |
|                           | 0.474        | 0.896        | 0.487        | 0.487        | 0.628        |
| <b>STEEGformer-b (f)</b>  | $\pm 0.201$  | $\pm 0.097$  | $\pm 0.196$  | $\pm 0.196$  | $\pm 0.215$  |
|                           | 0.018        | 0.612        | 0.043        | 0.043        | 0.083        |
| <b>STEEGformer-b (l)</b>  | $\pm 0.013$  | $\pm 0.049$  | $\pm 0.013$  | $\pm 0.013$  | $\pm 0.020$  |
|                           | <b>0.464</b> | 0.874        | <b>0.478</b> | <b>0.479</b> | <b>0.613</b> |
| <b>STEEGformer-l (f)</b>  | $\pm 0.214$  | $\pm 0.095$  | $\pm 0.209$  | $\pm 0.209$  | $\pm 0.222$  |
|                           | 0.034        | 0.672        | 0.058        | 0.058        | 0.107        |
| <b>STEEGformer-l (l)</b>  | $\pm 0.022$  | $\pm 0.063$  | $\pm 0.022$  | $\pm 0.021$  | $\pm 0.035$  |

Table 54: Per-Subject Performance Metrics of Population-Trained Models

| Subject         | Metric   | DeepConvnet | EEGNet      | Conformer   | CTNet        | SSVEPDNN    | BIOT (f)    | BIOT (f)    | BENDR (f)   | BENDR (f)   | CBraMod (f) | CBraMod (f)  | EEGPT (f)   | EEGPT (f)   | LaBraM (f)   | LaBraM (f)  | STEEGformer-s (f) | STEEGformer-s (f) | STEEGformer-b (f) | STEEGformer-b (f) | STEEGformer-l (f) | Under review |
|-----------------|----------|-------------|-------------|-------------|--------------|-------------|-------------|-------------|-------------|-------------|-------------|--------------|-------------|-------------|--------------|-------------|-------------------|-------------------|-------------------|-------------------|-------------------|--------------|
| Subject10.async | $\kappa$ | 0.059       | 0.060       | 0.046       | 0.078        | 0.039       | 0.041       | 0.026       | 0.066       | 0.024       | 0.040       | 0.035        | 0.032       | 0.055       | 0.186        | 0.009       | 0.123             | 0.020             | 0.333             | 0.017             | <b>0.254</b>      | 0.033        |
|                 |          | $\pm 0.026$ | $\pm 0.025$ | $\pm 0.028$ | $\pm 0.041$  | $\pm 0.029$ | $\pm 0.030$ | $\pm 0.008$ | $\pm 0.029$ | $\pm 0.011$ | $\pm 0.021$ | $\pm 0.023$  | $\pm 0.019$ | $\pm 0.028$ | $\pm 0.020$  | $\pm 0.010$ | $\pm 0.043$       | $\pm 0.008$       | $\pm 0.031$       | $\pm 0.014$       | $\pm 0.035$       | $\pm 0.018$  |
|                 | AUC      | 0.704       | 0.687       | 0.685       | 0.713        | 0.637       | 0.584       | 0.605       | 0.653       | 0.629       | 0.604       | 0.660        | 0.582       | 0.701       | 0.745        | 0.545       | 0.669             | 0.640             | 0.864             | 0.625             | <b>0.780</b>      | 0.702        |
|                 |          | $\pm 0.035$ | $\pm 0.013$ | $\pm 0.041$ | $\pm 0.026$  | $\pm 0.085$ | $\pm 0.032$ | $\pm 0.020$ | $\pm 0.030$ | $\pm 0.020$ | $\pm 0.046$ | $\pm 0.033$  | $\pm 0.011$ | $\pm 0.045$ | $\pm 0.019$  | $\pm 0.012$ | $\pm 0.033$       | $\pm 0.020$       | $\pm 0.013$       | $\pm 0.041$       | <b>0.032</b>      | $\pm 0.020$  |
|                 | BAcc     | 0.083       | 0.084       | 0.070       | 0.101        | 0.063       | 0.065       | 0.050       | 0.090       | 0.049       | 0.064       | 0.059        | 0.056       | 0.079       | 0.207        | 0.034       | 0.145             | 0.045             | 0.350             | 0.041             | <b>0.273</b>      | 0.077        |
|                 |          | $\pm 0.026$ | $\pm 0.025$ | $\pm 0.028$ | $\pm 0.040$  | $\pm 0.029$ | $\pm 0.030$ | $\pm 0.007$ | $\pm 0.028$ | $\pm 0.011$ | $\pm 0.020$ | $\pm 0.022$  | $\pm 0.019$ | $\pm 0.027$ | $\pm 0.019$  | $\pm 0.010$ | $\pm 0.042$       | $\pm 0.008$       | $\pm 0.030$       | $\pm 0.014$       | $\pm 0.035$       | $\pm 0.017$  |
| Subject11.async | Acc.1    | 0.083       | 0.084       | 0.070       | 0.101        | 0.063       | 0.065       | 0.050       | 0.090       | 0.049       | 0.064       | 0.062        | 0.057       | 0.081       | 0.206        | 0.033       | 0.146             | 0.044             | 0.352             | 0.041             | <b>0.275</b>      | 0.077        |
|                 |          | $\pm 0.026$ | $\pm 0.025$ | $\pm 0.028$ | $\pm 0.040$  | $\pm 0.029$ | $\pm 0.030$ | $\pm 0.007$ | $\pm 0.028$ | $\pm 0.011$ | $\pm 0.020$ | $\pm 0.022$  | $\pm 0.018$ | $\pm 0.027$ | $\pm 0.022$  | $\pm 0.010$ | $\pm 0.041$       | $\pm 0.007$       | $\pm 0.028$       | $\pm 0.014$       | <b>0.037</b>      | $\pm 0.017$  |
|                 | Acc.2    | 0.147       | 0.142       | 0.142       | 0.173        | 0.121       | 0.115       | 0.098       | 0.163       | 0.095       | 0.116       | 0.111        | 0.103       | 0.151       | 0.318        | 0.060       | 0.241             | 0.079             | 0.484             | 0.077             | <b>0.394</b>      | 0.076        |
|                 |          | $\pm 0.034$ | $\pm 0.040$ | $\pm 0.038$ | $\pm 0.047$  | $\pm 0.050$ | $\pm 0.036$ | $\pm 0.017$ | $\pm 0.042$ | $\pm 0.014$ | $\pm 0.014$ | $\pm 0.041$  | $\pm 0.026$ | $\pm 0.043$ | $\pm 0.032$  | $\pm 0.012$ | $\pm 0.063$       | $\pm 0.014$       | $\pm 0.026$       | $\pm 0.023$       | $\pm 0.038$       | $\pm 0.017$  |
|                 | $\kappa$ | 0.143       | 0.117       | 0.102       | 0.170        | 0.068       | 0.073       | 0.114       | 0.095       | 0.024       | 0.020       | 0.028        | 0.028       | 0.085       | 0.099        | 0.008       | 0.113             | 0.001             | 0.228             | -0.002            | <b>0.214</b>      | 0.023        |
|                 |          | $\pm 0.046$ | $\pm 0.048$ | $\pm 0.025$ | $\pm 0.035$  | $\pm 0.046$ | $\pm 0.047$ | $\pm 0.023$ | $\pm 0.024$ | $\pm 0.011$ | $\pm 0.019$ | $\pm 0.015$  | $\pm 0.006$ | $\pm 0.038$ | $\pm 0.023$  | $\pm 0.006$ | $\pm 0.037$       | $\pm 0.018$       | $\pm 0.050$       | $\pm 0.009$       | $\pm 0.025$       | $\pm 0.009$  |
| Subject12.async | AUC      | 0.784       | 0.773       | 0.739       | <b>0.795</b> | 0.684       | 0.608       | 0.742       | 0.695       | 0.600       | 0.567       | 0.614        | 0.570       | 0.733       | 0.674        | 0.536       | 0.634             | 0.549             | 0.795             | 0.545             | 0.764             | 0.587        |
|                 |          | $\pm 0.026$ | $\pm 0.023$ | $\pm 0.027$ | $\pm 0.030$  | $\pm 0.106$ | $\pm 0.038$ | $\pm 0.044$ | $\pm 0.037$ | $\pm 0.035$ | $\pm 0.032$ | $\pm 0.042$  | $\pm 0.023$ | $\pm 0.032$ | $\pm 0.024$  | $\pm 0.031$ | $\pm 0.024$       | $\pm 0.019$       | $\pm 0.022$       | $\pm 0.050$       | $\pm 0.018$       | $\pm 0.032$  |
|                 | BAcc     | 0.164       | 0.139       | 0.124       | 0.190        | 0.091       | 0.096       | 0.136       | 0.118       | 0.049       | 0.045       | 0.052        | 0.052       | 0.108       | 0.122        | 0.033       | 0.135             | 0.026             | 0.248             | 0.023             | <b>0.234</b>      | 0.038        |
|                 |          | $\pm 0.045$ | $\pm 0.047$ | $\pm 0.025$ | $\pm 0.034$  | $\pm 0.045$ | $\pm 0.046$ | $\pm 0.023$ | $\pm 0.023$ | $\pm 0.010$ | $\pm 0.019$ | $\pm 0.014$  | $\pm 0.006$ | $\pm 0.037$ | $\pm 0.022$  | $\pm 0.006$ | $\pm 0.036$       | $\pm 0.017$       | $\pm 0.049$       | $\pm 0.009$       | $\pm 0.024$       | $\pm 0.008$  |
|                 | Acc.1    | 0.164       | 0.139       | 0.124       | 0.190        | 0.091       | 0.096       | 0.136       | 0.117       | 0.049       | 0.045       | 0.052        | 0.052       | 0.107       | 0.120        | 0.032       | 0.134             | 0.026             | 0.246             | 0.022             | <b>0.232</b>      | 0.038        |
|                 |          | $\pm 0.045$ | $\pm 0.047$ | $\pm 0.025$ | $\pm 0.034$  | $\pm 0.045$ | $\pm 0.045$ | $\pm 0.020$ | $\pm 0.022$ | $\pm 0.010$ | $\pm 0.019$ | $\pm 0.013$  | $\pm 0.007$ | $\pm 0.036$ | $\pm 0.021$  | $\pm 0.006$ | $\pm 0.035$       | $\pm 0.017$       | $\pm 0.051$       | $\pm 0.009$       | $\pm 0.025$       | $\pm 0.009$  |
| Subject12.async | Acc.2    | 0.271       | 0.240       | 0.209       | 0.308        | 0.158       | 0.154       | 0.230       | 0.196       | 0.089       | 0.085       | 0.102        | 0.092       | 0.189       | 0.206        | 0.059       | 0.222             | 0.055             | 0.355             | 0.053             | <b>0.340</b>      | 0.071        |
|                 |          | $\pm 0.043$ | $\pm 0.065$ | $\pm 0.024$ | $\pm 0.039$  | $\pm 0.068$ | $\pm 0.046$ | $\pm 0.036$ | $\pm 0.036$ | $\pm 0.014$ | $\pm 0.036$ | $\pm 0.032$  | $\pm 0.012$ | $\pm 0.049$ | $\pm 0.035$  | $\pm 0.011$ | $\pm 0.027$       | $\pm 0.023$       | $\pm 0.060$       | $\pm 0.016$       | $\pm 0.032$       | $\pm 0.011$  |
|                 | $\kappa$ | 0.029       | 0.023       | 0.054       | 0.040        | 0.023       | 0.021       | 0.012       | 0.016       | 0.018       | 0.037       | 0.030        | 0.007       | 0.039       | <b>0.060</b> | 0.006       | 0.058             | 0.007             | 0.042             | 0.003             | 0.092             | 0.006        |
|                 |          | $\pm 0.020$ | $\pm 0.018$ | $\pm 0.022$ | $\pm 0.025$  | $\pm 0.029$ | $\pm 0.008$ | $\pm 0.006$ | $\pm 0.013$ | $\pm 0.015$ | $\pm 0.022$ | $\pm 0.018$  | $\pm 0.006$ | $\pm 0.032$ | $\pm 0.036$  | $\pm 0.010$ | $\pm 0.028$       | $\pm 0.022$       | $\pm 0.024$       | $\pm 0.006$       | $\pm 0.022$       | $\pm 0.015$  |
|                 | AUC      | 0.669       | 0.661       | 0.683       | 0.678        | 0.604       | 0.549       | 0.529       | 0.573       | 0.628       | 0.605       | <b>0.680</b> | 0.564       | 0.675       | 0.621        | 0.505       | 0.601             | 0.515             | 0.593             | 0.507             | 0.661             | 0.535        |
|                 |          | $\pm 0.045$ | $\pm 0.025$ | $\pm 0.042$ | $\pm 0.042$  | $\pm 0.089$ | $\pm 0.014$ | $\pm 0.021$ | $\pm 0.028$ | $\pm 0.017$ | $\pm 0.013$ | $\pm 0.025$  | $\pm 0.022$ | $\pm 0.033$ | $\pm 0.026$  | $\pm 0.024$ | $\pm 0.026$       | $\pm 0.025$       | $\pm 0.025$       | $\pm 0.025$       | $\pm 0.024$       | $\pm 0.019$  |
| Subject12.async | BAcc     | 0.054       | 0.047       | 0.077       | 0.064        | 0.047       | 0.045       | 0.037       | 0.041       | 0.043       | 0.061       | 0.054        | 0.032       | 0.063       | <b>0.084</b> | 0.030       | 0.082             | 0.032             | 0.066             | 0.028             | 0.115             | 0.030        |
|                 |          | $\pm 0.020$ | $\pm 0.017$ | $\pm 0.022$ | $\pm 0.024$  | $\pm 0.029$ | $\pm 0.008$ | $\pm 0.006$ | $\pm 0.013$ | $\pm 0.015$ | $\pm 0.022$ | $\pm 0.018$  | $\pm 0.005$ | $\pm 0.031$ | $\pm 0.035$  | $\pm 0.010$ | $\pm 0.028$       | $\pm 0.021$       | $\pm 0.024$       | $\pm 0.006$       | $\pm 0.022$       | $\pm 0.015$  |
|                 | Acc.1    | 0.054       | 0.047       | 0.077       | 0.064        | 0.047       | 0.045       | 0.036       | 0.041       | 0.043       | 0.061       | 0.056        | 0.032       | 0.063       | <b>0.083</b> | 0.030       | 0.080             | 0.032             | 0.065             | 0.027             | 0.113             | 0.030        |
|                 |          | $\pm 0.020$ | $\pm 0.017$ | $\pm 0.022$ | $\pm 0.024$  | $\pm 0.029$ | $\pm 0.008$ | $\pm 0.006$ | $\pm 0.013$ | $\pm 0.016$ | $\pm 0.022$ | $\pm 0.020$  | $\pm 0.005$ | $\pm 0.031$ | $\pm 0.036$  | $\pm 0.010$ | $\pm 0.027$       | $\pm 0.020$       | $\pm 0.023$       | $\pm 0.005$       | $\pm 0.021$       | $\pm 0.014$  |
|                 |          |             |             |             |              |             |             |             |             |             |             |              |             |             |              |             |                   |                   |                   |                   |                   |              |
|                 |          |             |             |             |              |             |             |             |             |             |             |              |             |             |              |             |                   |                   |                   |                   |                   |              |

Continued on next page

| Subject         | Metric   | DeepConvnet     | EEGNet          | Conformer       | CTNet                         | SSVEPDNN        | BIOT <sup>(f)</sup> | BIOT <sup>(l)</sup> | BENDR <sup>(f)</sup> | BENDR <sup>(l)</sup> | CBraMod <sup>(f)</sup> | CBraMod <sup>(l)</sup> | EEGPT <sup>(f)</sup> | EEGPT <sup>(l)</sup> | LaBraM <sup>(f)</sup>         | LaBraM <sup>(l)</sup> | STEEGformer-s <sup>(f)</sup> | STEEGformer-s <sup>(l)</sup> | STEEGformer-b <sup>(f)</sup>  | STEEGformer-b <sup>(l)</sup> | STEEGformer-l <sup>(f)</sup>  | Unimodal baseline |
|-----------------|----------|-----------------|-----------------|-----------------|-------------------------------|-----------------|---------------------|---------------------|----------------------|----------------------|------------------------|------------------------|----------------------|----------------------|-------------------------------|-----------------------|------------------------------|------------------------------|-------------------------------|------------------------------|-------------------------------|-------------------|
| Subject13_async | Acc.2    | 0.113<br>±0.028 | 0.100<br>±0.029 | 0.127<br>±0.024 | 0.120<br>±0.037               | 0.085<br>±0.051 | 0.088<br>±0.009     | 0.062<br>±0.005     | 0.084<br>±0.013      | 0.090<br>±0.022      | 0.114<br>±0.019        | 0.107<br>±0.027        | 0.062<br>±0.011      | 0.114<br>±0.047      | <b>0.146</b><br><b>±0.040</b> | 0.051<br>±0.013       | 0.140<br>±0.024              | 0.060<br>±0.020              | 0.108<br>±0.024               | 0.061<br>±0.024              | 0.190<br>±0.015               | 0.164<br>±0.026   |
|                 | $\kappa$ | 0.507<br>±0.067 | 0.418<br>±0.058 | 0.340<br>±0.063 | 0.560<br>±0.084               | 0.201<br>±0.126 | 0.334<br>±0.071     | 0.216<br>±0.059     | 0.543<br>±0.047      | 0.060<br>±0.017      | 0.067<br>±0.024        | 0.008<br>±0.013        | 0.174<br>±0.035      | 0.406<br>±0.046      | 0.518<br>±0.092               | 0.007<br>±0.010       | 0.552<br>±0.076              | 0.041<br>±0.015              | <b>0.685</b><br><b>±0.079</b> | 0.040<br>±0.018              | 0.697<br>±0.081               | 0.100<br>±0.027   |
|                 | AUC      | 0.958<br>±0.015 | 0.937<br>±0.016 | 0.915<br>±0.027 | 0.962<br>±0.013               | 0.798<br>±0.168 | 0.831<br>±0.048     | 0.867<br>±0.027     | 0.950<br>±0.018      | 0.744<br>±0.011      | 0.692<br>±0.028        | 0.599<br>±0.039        | 0.778<br>±0.023      | 0.941<br>±0.011      | 0.923<br>±0.042               | 0.538<br>±0.011       | 0.912<br>±0.025              | 0.657<br>±0.046              | 0.912<br>±0.025               | 0.659<br>±0.025              | <b>0.963</b><br><b>±0.025</b> | 0.966<br>±0.039   |
|                 | BAcc     | 0.519<br>±0.065 | 0.432<br>±0.057 | 0.356<br>±0.062 | 0.571<br>±0.082               | 0.221<br>±0.122 | 0.350<br>±0.069     | 0.236<br>±0.057     | 0.554<br>±0.046      | 0.083<br>±0.016      | 0.090<br>±0.023        | 0.033<br>±0.012        | 0.195<br>±0.034      | 0.420<br>±0.045      | 0.530<br>±0.089               | 0.032<br>±0.010       | 0.563<br>±0.074              | 0.065<br>±0.014              | <b>0.693</b><br><b>±0.077</b> | 0.064<br>±0.018              | 0.704<br>±0.079               | 0.104<br>±0.026   |
|                 | Acc.1    | 0.519<br>±0.065 | 0.432<br>±0.057 | 0.356<br>±0.062 | 0.571<br>±0.082               | 0.221<br>±0.122 | 0.354<br>±0.068     | 0.234<br>±0.056     | 0.556<br>±0.047      | 0.085<br>±0.016      | 0.092<br>±0.022        | 0.039<br>±0.014        | 0.195<br>±0.034      | 0.421<br>±0.047      | 0.532<br>±0.088               | 0.032<br>±0.010       | 0.565<br>±0.075              | 0.064<br>±0.015              | <b>0.695</b><br><b>±0.077</b> | 0.063<br>±0.018              | 0.705<br>±0.078               | 0.104<br>±0.025   |
|                 | Acc.2    | 0.696<br>±0.083 | 0.600<br>±0.053 | 0.499<br>±0.067 | 0.727<br>±0.075               | 0.336<br>±0.169 | 0.519<br>±0.067     | 0.401<br>±0.057     | 0.714<br>±0.042      | 0.152<br>±0.021      | 0.191<br>±0.037        | 0.081<br>±0.026        | 0.298<br>±0.037      | 0.606<br>±0.049      | 0.671<br>±0.103               | 0.064<br>±0.017       | 0.708<br>±0.076              | 0.118<br>±0.023              | <b>0.844</b><br><b>±0.048</b> | 0.108<br>±0.025              | 0.852<br>±0.060               | 0.108<br>±0.032   |
|                 | $\kappa$ | 0.559<br>±0.047 | 0.413<br>±0.073 | 0.379<br>±0.038 | 0.598<br>±0.052               | 0.234<br>±0.134 | 0.448<br>±0.036     | 0.359<br>±0.026     | 0.493<br>±0.053      | 0.058<br>±0.017      | 0.077<br>±0.030        | 0.061<br>±0.009        | 0.179<br>±0.023      | 0.337<br>±0.022      | 0.636<br>±0.026               | 0.011<br>±0.007       | 0.663<br>±0.069              | 0.024<br>±0.011              | 0.772<br>±0.027               | 0.030<br>±0.011              | <b>0.760</b><br><b>±0.042</b> | 0.100<br>±0.022   |
|                 | AUC      | 0.969<br>±0.007 | 0.943<br>±0.018 | 0.941<br>±0.007 | 0.974<br>±0.009               | 0.815<br>±0.177 | 0.898<br>±0.013     | 0.943<br>±0.011     | 0.947<br>±0.009      | 0.721<br>±0.012      | 0.695<br>±0.031        | 0.752<br>±0.025        | 0.777<br>±0.014      | 0.926<br>±0.011      | 0.958<br>±0.012               | 0.569<br>±0.019       | 0.951<br>±0.020              | 0.677<br>±0.032              | 0.986<br>±0.003               | 0.694<br>±0.024              | <b>0.977</b><br><b>±0.003</b> | 0.803<br>±0.028   |
|                 | BAcc     | 0.570<br>±0.046 | 0.428<br>±0.072 | 0.395<br>±0.037 | 0.608<br>±0.050               | 0.254<br>±0.130 | 0.462<br>±0.035     | 0.375<br>±0.025     | 0.506<br>±0.052      | 0.081<br>±0.017      | 0.100<br>±0.029        | 0.084<br>±0.009        | 0.199<br>±0.023      | 0.353<br>±0.022      | 0.645<br>±0.026               | 0.036<br>±0.007       | 0.672<br>±0.067              | 0.049<br>±0.011              | 0.778<br>±0.026               | 0.055<br>±0.011              | <b>0.766</b><br><b>±0.041</b> | 0.112<br>±0.022   |
|                 | Acc.1    | 0.570<br>±0.046 | 0.428<br>±0.072 | 0.395<br>±0.037 | 0.608<br>±0.050               | 0.254<br>±0.130 | 0.462<br>±0.036     | 0.372<br>±0.025     | 0.507<br>±0.053      | 0.082<br>±0.018      | 0.100<br>±0.029        | 0.088<br>±0.010        | 0.198<br>±0.023      | 0.353<br>±0.020      | 0.648<br>±0.024               | 0.036<br>±0.007       | 0.674<br>±0.067              | 0.048<br>±0.011              | 0.780<br>±0.027               | 0.054<br>±0.011              | <b>0.769</b><br><b>±0.040</b> | 0.111<br>±0.021   |
|                 | Acc.2    | 0.740<br>±0.042 | 0.616<br>±0.072 | 0.573<br>±0.042 | 0.780<br>±0.049               | 0.376<br>±0.185 | 0.649<br>±0.032     | 0.588<br>±0.024     | 0.672<br>±0.062      | 0.145<br>±0.011      | 0.178<br>±0.034        | 0.164<br>±0.028        | 0.300<br>±0.017      | 0.517<br>±0.013      | 0.795<br>±0.030               | 0.067<br>±0.009       | 0.823<br>±0.030              | 0.084<br>±0.016              | 0.902<br>±0.020               | 0.108<br>±0.012              | <b>0.892</b><br><b>±0.019</b> | 0.205<br>±0.027   |
| Subject15_async | $\kappa$ | 0.331<br>±0.109 | 0.283<br>±0.112 | 0.175<br>±0.084 | 0.348<br>±0.105               | 0.193<br>±0.132 | 0.264<br>±0.081     | 0.214<br>±0.065     | 0.307<br>±0.133      | 0.031<br>±0.020      | 0.034<br>±0.031        | 0.008<br>±0.011        | 0.089<br>±0.026      | 0.181<br>±0.059      | 0.245<br>±0.080               | 0.007<br>±0.008       | 0.283<br>±0.112              | -0.005<br>±0.011             | 0.453<br>±0.124               | 0.008<br>±0.011              | <b>0.420</b><br><b>±0.124</b> | 0.006<br>±0.016   |
|                 | AUC      | 0.881<br>±0.062 | 0.868<br>±0.053 | 0.802<br>±0.057 | <b>0.890</b><br><b>±0.049</b> | 0.767<br>±0.156 | 0.792<br>±0.052     | 0.847<br>±0.071     | 0.842<br>±0.080      | 0.645<br>±0.019      | 0.611<br>±0.039        | 0.624<br>±0.045        | 0.680<br>±0.035      | 0.832<br>±0.043      | 0.796<br>±0.047               | 0.522<br>±0.023       | 0.778<br>±0.080              | 0.568<br>±0.025              | 0.911<br>±0.048               | 0.573<br>±0.035              | 0.875<br>±0.051               | 0.631<br>±0.042   |
|                 | BAcc     | 0.348<br>±0.106 | 0.301<br>±0.110 | 0.195<br>±0.082 | 0.364<br>±0.102               | 0.213<br>±0.128 | 0.282<br>±0.079     | 0.234<br>±0.064     | 0.324<br>±0.130      | 0.055<br>±0.020      | 0.059<br>±0.031        | 0.033<br>±0.011        | 0.111<br>±0.025      | 0.202<br>±0.057      | 0.264<br>±0.078               | 0.031<br>±0.008       | 0.300<br>±0.109              | 0.020<br>±0.011              | 0.467<br>±0.121               | 0.033<br>±0.011              | <b>0.434</b><br><b>±0.121</b> | 0.030<br>±0.015   |
|                 | Acc.1    | 0.348<br>±0.106 | 0.301<br>±0.110 | 0.195<br>±0.082 | 0.364<br>±0.102               | 0.213<br>±0.128 | 0.283<br>±0.080     | 0.233<br>±0.060     | 0.323<br>±0.130      | 0.055<br>±0.020      | 0.059<br>±0.031        | 0.035<br>±0.012        | 0.111<br>±0.025      | 0.204<br>±0.057      | 0.265<br>±0.079               | 0.031<br>±0.007       | 0.301<br>±0.110              | 0.021<br>±0.013              | 0.467<br>±0.122               | 0.033<br>±0.010              | <b>0.435</b><br><b>±0.121</b> | 0.031<br>±0.015   |
|                 |          |                 |                 |                 |                               |                 |                     |                     |                      |                      |                        |                        |                      |                      |                               |                       |                              |                              |                               |                              |                               |                   |

Continued on next page

| Subject         | Metric   | DeepConvnet                    | EEGNet          | Conformer       | CTNet                          | SSVEPDNN        | BIOT (f)        | BIOT (f)        | BENDR (f)       | BENDR (f)       | CBraMod (f)     | CBraMod (f)     | EEGPT (f)       | EEGPT (f)       | LaBraM (f)      | LaBraM (f)      | STEEGformer-s (f) | STEEGformer-s (f) | STEEGformer-b (f)              | STEEGformer-b (f) | STEEGformer-l (f)              | Unlabeled       |
|-----------------|----------|--------------------------------|-----------------|-----------------|--------------------------------|-----------------|-----------------|-----------------|-----------------|-----------------|-----------------|-----------------|-----------------|-----------------|-----------------|-----------------|-------------------|-------------------|--------------------------------|-------------------|--------------------------------|-----------------|
| Subject16_async | Acc.2    | 0.486<br>±0.159                | 0.441<br>±0.124 | 0.320<br>±0.105 | 0.517<br>±0.128                | 0.311<br>±0.170 | 0.416<br>±0.112 | 0.375<br>±0.096 | 0.442<br>±0.147 | 0.107<br>±0.028 | 0.114<br>±0.050 | 0.065<br>±0.022 | 0.178<br>±0.025 | 0.323<br>±0.080 | 0.407<br>±0.091 | 0.060<br>±0.008 | 0.438<br>±0.139   | 0.051<br>±0.010   | 0.619<br>± 0.137               | 0.067<br>±0.020   | <b>0.597</b><br>± <b>0.112</b> | 0.569<br>±0.020 |
|                 | $\kappa$ | 0.357<br>±0.069                | 0.314<br>±0.040 | 0.212<br>±0.055 | 0.421<br>±0.053                | 0.181<br>±0.114 | 0.279<br>±0.036 | 0.179<br>±0.068 | 0.335<br>±0.076 | 0.035<br>±0.013 | 0.042<br>±0.027 | 0.048<br>±0.030 | 0.069<br>±0.023 | 0.178<br>±0.036 | 0.415<br>±0.036 | 0.004<br>±0.011 | 0.440<br>±0.015   | 0.004<br>±0.013   | 0.587<br>± 0.021               | 0.010<br>±0.011   | <b>0.580</b><br>± <b>0.034</b> | 0.566<br>±0.018 |
|                 | AUC      | 0.907<br>±0.034                | 0.892<br>±0.035 | 0.840<br>±0.031 | 0.928<br>±0.018                | 0.774<br>±0.157 | 0.824<br>±0.026 | 0.868<br>±0.031 | 0.891<br>±0.032 | 0.658<br>±0.012 | 0.650<br>±0.014 | 0.693<br>±0.032 | 0.659<br>±0.012 | 0.825<br>±0.039 | 0.880<br>±0.020 | 0.516<br>±0.023 | 0.872<br>±0.009   | 0.590<br>±0.027   | 0.963<br>± 0.013               | 0.557<br>±0.031   | <b>0.936</b><br>± <b>0.017</b> | 0.907<br>±0.031 |
|                 | BAcc     | 0.373<br>±0.067                | 0.331<br>±0.039 | 0.231<br>±0.054 | 0.435<br>±0.052                | 0.201<br>±0.111 | 0.297<br>±0.035 | 0.199<br>±0.066 | 0.351<br>±0.074 | 0.059<br>±0.013 | 0.066<br>±0.026 | 0.072<br>±0.029 | 0.093<br>±0.023 | 0.199<br>±0.035 | 0.430<br>±0.035 | 0.029<br>±0.010 | 0.454<br>±0.015   | 0.029<br>±0.013   | 0.598<br>± 0.021               | 0.035<br>±0.010   | <b>0.591</b><br>± <b>0.033</b> | 0.561<br>±0.018 |
|                 | Acc.1    | 0.373<br>±0.067                | 0.331<br>±0.039 | 0.231<br>±0.054 | 0.435<br>±0.052                | 0.201<br>±0.111 | 0.294<br>±0.034 | 0.197<br>±0.066 | 0.352<br>±0.075 | 0.060<br>±0.013 | 0.068<br>±0.028 | 0.075<br>±0.029 | 0.093<br>±0.025 | 0.199<br>±0.037 | 0.431<br>±0.037 | 0.028<br>±0.010 | 0.454<br>±0.011   | 0.028<br>±0.013   | 0.598<br>± 0.019               | 0.035<br>±0.011   | <b>0.593</b><br>± <b>0.035</b> | 0.560<br>±0.017 |
|                 | Acc.2    | 0.529<br>±0.077                | 0.477<br>±0.055 | 0.368<br>±0.054 | 0.588<br>±0.043                | 0.297<br>±0.155 | 0.483<br>±0.046 | 0.360<br>±0.061 | 0.515<br>±0.075 | 0.113<br>±0.009 | 0.140<br>±0.043 | 0.138<br>±0.055 | 0.143<br>±0.033 | 0.311<br>±0.060 | 0.580<br>±0.047 | 0.047<br>±0.008 | 0.619<br>±0.033   | 0.068<br>±0.018   | 0.758<br>± 0.044               | 0.069<br>±0.029   | <b>0.741</b><br>± <b>0.026</b> | 0.627<br>±0.023 |
|                 | $\kappa$ | 0.415<br>±0.068                | 0.340<br>±0.055 | 0.311<br>±0.052 | 0.424<br>±0.046                | 0.208<br>±0.123 | 0.426<br>±0.079 | 0.331<br>±0.026 | 0.392<br>±0.050 | 0.030<br>±0.008 | 0.035<br>±0.017 | 0.021<br>±0.019 | 0.096<br>±0.013 | 0.195<br>±0.027 | 0.413<br>±0.073 | 0.010<br>±0.006 | 0.461<br>±0.063   | 0.018<br>±0.020   | <b>0.588</b><br>± <b>0.054</b> | 0.021<br>±0.007   | 0.603<br>± 0.068               | 0.579<br>±0.025 |
|                 | AUC      | <b>0.953</b><br>± <b>0.018</b> | 0.927<br>±0.031 | 0.907<br>±0.030 | 0.951<br>±0.014                | 0.822<br>±0.181 | 0.891<br>±0.033 | 0.940<br>±0.006 | 0.916<br>±0.020 | 0.627<br>±0.013 | 0.607<br>±0.038 | 0.621<br>±0.018 | 0.693<br>±0.019 | 0.853<br>±0.024 | 0.876<br>±0.046 | 0.524<br>±0.028 | 0.871<br>±0.029   | 0.584<br>±0.030   | 0.963<br>± 0.016               | 0.627<br>±0.030   | 0.946<br>±0.017                | 0.666<br>±0.031 |
|                 | BAcc     | 0.430<br>±0.066                | 0.357<br>±0.053 | 0.329<br>±0.050 | 0.438<br>±0.045                | 0.228<br>±0.120 | 0.440<br>±0.077 | 0.348<br>±0.026 | 0.407<br>±0.049 | 0.055<br>±0.008 | 0.059<br>±0.017 | 0.046<br>±0.018 | 0.119<br>±0.013 | 0.215<br>±0.026 | 0.428<br>±0.071 | 0.035<br>±0.006 | 0.475<br>±0.062   | 0.043<br>±0.019   | <b>0.598</b><br>± <b>0.053</b> | 0.046<br>±0.007   | 0.613<br>± 0.067               | 0.051<br>±0.024 |
|                 | Acc.1    | 0.430<br>±0.066                | 0.357<br>±0.053 | 0.329<br>±0.050 | 0.438<br>±0.045                | 0.228<br>±0.120 | 0.443<br>±0.077 | 0.349<br>±0.027 | 0.405<br>±0.047 | 0.055<br>±0.008 | 0.062<br>±0.018 | 0.046<br>±0.018 | 0.117<br>±0.013 | 0.217<br>±0.025 | 0.427<br>±0.072 | 0.035<br>±0.006 | 0.476<br>±0.061   | 0.042<br>±0.019   | <b>0.601</b><br>± <b>0.052</b> | 0.046<br>±0.007   | 0.617<br>± 0.064               | 0.050<br>±0.024 |
|                 | Acc.2    | 0.626<br>±0.079                | 0.524<br>±0.081 | 0.476<br>±0.054 | 0.646<br>±0.084                | 0.366<br>±0.183 | 0.633<br>±0.077 | 0.569<br>±0.036 | 0.578<br>±0.054 | 0.095<br>±0.009 | 0.109<br>±0.027 | 0.082<br>±0.024 | 0.194<br>±0.024 | 0.331<br>±0.029 | 0.614<br>±0.083 | 0.061<br>±0.012 | 0.638<br>±0.069   | 0.073<br>±0.020   | <b>0.778</b><br>± <b>0.059</b> | 0.094<br>±0.021   | 0.787<br>± 0.071               | 0.110<br>±0.035 |
| Subject18_async | $\kappa$ | 0.386<br>±0.020                | 0.292<br>±0.058 | 0.312<br>±0.040 | 0.523<br>±0.031                | 0.194<br>±0.127 | 0.525<br>±0.063 | 0.386<br>±0.045 | 0.445<br>±0.071 | 0.028<br>±0.007 | 0.055<br>±0.028 | 0.040<br>±0.025 | 0.078<br>±0.015 | 0.172<br>±0.049 | 0.619<br>±0.042 | 0.011<br>±0.010 | 0.592<br>±0.065   | 0.011<br>±0.019   | <b>0.690</b><br>± <b>0.026</b> | 0.020<br>±0.014   | 0.746<br>± 0.034               | 0.032<br>±0.021 |
|                 | AUC      | 0.937<br>±0.006                | 0.897<br>±0.043 | 0.912<br>±0.008 | <b>0.971</b><br>± <b>0.007</b> | 0.808<br>±0.173 | 0.936<br>±0.009 | 0.954<br>±0.014 | 0.925<br>±0.023 | 0.642<br>±0.011 | 0.629<br>±0.047 | 0.687<br>±0.020 | 0.677<br>±0.019 | 0.838<br>±0.022 | 0.953<br>±0.009 | 0.558<br>±0.011 | 0.928<br>±0.031   | 0.635<br>±0.043   | 0.977<br>± 0.006               | 0.664<br>±0.036   | 0.967<br>±0.013                | 0.728<br>±0.034 |
|                 | BAcc     | 0.401<br>±0.019                | 0.310<br>±0.057 | 0.329<br>±0.039 | 0.535<br>±0.030                | 0.215<br>±0.124 | 0.537<br>±0.061 | 0.401<br>±0.044 | 0.459<br>±0.069 | 0.052<br>±0.007 | 0.078<br>±0.027 | 0.064<br>±0.024 | 0.101<br>±0.015 | 0.192<br>±0.048 | 0.628<br>±0.041 | 0.036<br>±0.009 | 0.602<br>±0.063   | 0.035<br>±0.019   | <b>0.698</b><br>± <b>0.025</b> | 0.044<br>±0.014   | 0.753<br>± 0.033               | 0.056<br>±0.021 |
|                 | Acc.1    | 0.401<br>±0.019                | 0.310<br>±0.057 | 0.329<br>±0.039 | 0.535<br>±0.030                | 0.215<br>±0.124 | 0.535<br>±0.063 | 0.397<br>±0.044 | 0.458<br>±0.071 | 0.053<br>±0.006 | 0.079<br>±0.028 | 0.066<br>±0.024 | 0.102<br>±0.015 | 0.193<br>±0.046 | 0.629<br>±0.040 | 0.036<br>±0.010 | 0.601<br>±0.062   | 0.034<br>±0.018   | <b>0.697</b><br>± <b>0.023</b> | 0.044<br>±0.014   | 0.753<br>± 0.032               | 0.056<br>±0.020 |
|                 | Acc.2    | 0.401<br>±0.019                | 0.310<br>±0.057 | 0.329<br>±0.039 | 0.535<br>±0.030                | 0.215<br>±0.124 | 0.535<br>±0.063 | 0.397<br>±0.044 | 0.458<br>±0.071 | 0.053<br>±0.006 | 0.079<br>±0.028 | 0.066<br>±0.024 | 0.102<br>±0.015 | 0.193<br>±0.046 | 0.629<br>±0.040 | 0.036<br>±0.010 | 0.601<br>±0.062   | 0.034<br>±0.018   | <b>0.697</b><br>± <b>0.023</b> | 0.044<br>±0.014   | 0.753<br>± 0.032               | 0.056<br>±0.020 |

Continued on next page

| Subject                | Metric          | DeepConvnet     | EEGNet          | Conformer       | CTNet            | SSVEPDNN        | BIOT (f)        | BIOT (l)        | BENDR (f)       | BENDR (l)       | CBraMod (f)     | CBraMod (l)     | EEGPT (f)       | EEGPT (l)       | LaBraM (f)      | LaBraM (l)      | STEEGformer-s (f) | STEEGformer-s (l) | STEEGformer-b (f) | STEEGformer-b (l) | STEEGformer-l (f) | Unlabeled        |
|------------------------|-----------------|-----------------|-----------------|-----------------|------------------|-----------------|-----------------|-----------------|-----------------|-----------------|-----------------|-----------------|-----------------|-----------------|-----------------|-----------------|-------------------|-------------------|-------------------|-------------------|-------------------|------------------|
| Subject19_async        | Acc.2           | 0.571<br>±0.027 | 0.468<br>±0.087 | 0.490<br>±0.028 | 0.755<br>±0.049  | 0.331<br>±0.173 | 0.791<br>±0.081 | 0.646<br>±0.061 | 0.615<br>±0.071 | 0.104<br>±0.013 | 0.141<br>±0.035 | 0.118<br>±0.019 | 0.162<br>±0.016 | 0.300<br>±0.063 | 0.796<br>±0.023 | 0.061<br>±0.008 | 0.750<br>±0.052   | 0.075<br>±0.023   | 0.853<br>± 0.035  | 0.084<br>±0.022   | 0.869<br>± 0.029  | 0.577<br>±0.019  |
|                        | κ               | 0.208<br>±0.029 | 0.191<br>±0.050 | 0.132<br>±0.048 | 0.292<br>±0.047  | 0.071<br>±0.043 | 0.172<br>±0.025 | 0.134<br>±0.035 | 0.156<br>±0.035 | 0.026<br>±0.011 | 0.076<br>±0.039 | 0.039<br>±0.009 | 0.053<br>±0.010 | 0.107<br>±0.023 | 0.274<br>±0.079 | 0.003<br>±0.007 | 0.262<br>±0.055   | 0.018<br>±0.007   | 0.485<br>± 0.041  | 0.022<br>±0.015   | 0.426<br>± 0.058  | 0.577<br>±0.022  |
|                        | AUC             | 0.871<br>±0.012 | 0.835<br>±0.017 | 0.803<br>±0.040 | 0.895<br>± 0.019 | 0.706<br>±0.117 | 0.734<br>±0.018 | 0.783<br>±0.016 | 0.762<br>±0.028 | 0.673<br>±0.007 | 0.704<br>±0.037 | 0.714<br>±0.018 | 0.645<br>±0.013 | 0.787<br>±0.016 | 0.807<br>±0.029 | 0.549<br>±0.026 | 0.776<br>±0.026   | 0.656<br>±0.028   | 0.930<br>± 0.019  | 0.641<br>±0.053   | 0.872<br>±0.021   | 0.577<br>±0.038  |
|                        | BAcc            | 0.228<br>±0.028 | 0.211<br>±0.049 | 0.154<br>±0.047 | 0.310<br>±0.046  | 0.094<br>±0.042 | 0.193<br>±0.025 | 0.155<br>±0.034 | 0.177<br>±0.034 | 0.050<br>±0.011 | 0.099<br>±0.038 | 0.063<br>±0.009 | 0.077<br>±0.010 | 0.129<br>±0.023 | 0.292<br>±0.077 | 0.028<br>±0.007 | 0.280<br>±0.054   | 0.042<br>±0.007   | 0.498<br>± 0.040  | 0.046<br>±0.015   | 0.440<br>± 0.057  | 0.577<br>±0.021  |
|                        | Acc.1           | 0.228<br>±0.028 | 0.211<br>±0.049 | 0.154<br>±0.047 | 0.310<br>±0.046  | 0.094<br>±0.042 | 0.193<br>±0.025 | 0.154<br>±0.034 | 0.177<br>±0.036 | 0.052<br>±0.012 | 0.099<br>±0.039 | 0.065<br>±0.010 | 0.076<br>±0.010 | 0.130<br>±0.023 | 0.291<br>±0.077 | 0.028<br>±0.006 | 0.278<br>±0.052   | 0.042<br>±0.006   | 0.495<br>± 0.042  | 0.046<br>±0.015   | 0.438<br>± 0.055  | 0.577<br>±0.021  |
|                        | Acc.2           | 0.362<br>±0.019 | 0.321<br>±0.051 | 0.270<br>±0.059 | 0.451<br>±0.049  | 0.159<br>±0.063 | 0.300<br>±0.036 | 0.283<br>±0.038 | 0.268<br>±0.037 | 0.112<br>±0.015 | 0.174<br>±0.044 | 0.139<br>±0.013 | 0.137<br>±0.024 | 0.218<br>±0.028 | 0.423<br>±0.066 | 0.059<br>±0.008 | 0.420<br>±0.041   | 0.077<br>±0.008   | 0.628<br>± 0.043  | 0.088<br>±0.023   | 0.547<br>± 0.060  | 0.577<br>±0.026  |
| Subject1_async         | κ               | 0.219<br>±0.043 | 0.138<br>±0.035 | 0.139<br>±0.029 | 0.261<br>±0.056  | 0.082<br>±0.052 | 0.139<br>±0.061 | 0.164<br>±0.035 | 0.134<br>±0.039 | 0.014<br>±0.006 | 0.018<br>±0.029 | 0.015<br>±0.011 | 0.028<br>±0.012 | 0.079<br>±0.031 | 0.278<br>±0.061 | 0.003<br>±0.007 | 0.278<br>±0.023   | 0.004<br>±0.019   | 0.501<br>± 0.046  | 0.001<br>±0.012   | 0.432<br>± 0.044  | 0.577<br>±0.011  |
|                        | AUC             | 0.841<br>±0.026 | 0.787<br>±0.033 | 0.776<br>±0.019 | 0.883<br>± 0.024 | 0.696<br>±0.112 | 0.691<br>±0.061 | 0.816<br>±0.036 | 0.743<br>±0.055 | 0.576<br>±0.048 | 0.575<br>±0.047 | 0.589<br>±0.056 | 0.586<br>±0.020 | 0.698<br>±0.026 | 0.798<br>±0.033 | 0.523<br>±0.031 | 0.766<br>±0.021   | 0.575<br>±0.026   | 0.921<br>± 0.015  | 0.557<br>±0.026   | 0.877<br>±0.029   | 0.624<br>±0.053  |
|                        | BAcc            | 0.238<br>±0.042 | 0.160<br>±0.034 | 0.160<br>±0.028 | 0.280<br>±0.054  | 0.105<br>±0.050 | 0.160<br>±0.059 | 0.185<br>±0.034 | 0.156<br>±0.038 | 0.038<br>±0.006 | 0.043<br>±0.028 | 0.040<br>±0.010 | 0.052<br>±0.011 | 0.102<br>±0.030 | 0.296<br>±0.059 | 0.028<br>±0.007 | 0.296<br>±0.022   | 0.029<br>±0.018   | 0.514<br>± 0.044  | 0.026<br>±0.012   | 0.446<br>± 0.043  | 0.048<br>±0.011  |
|                        | Acc.1           | 0.238<br>±0.042 | 0.160<br>±0.034 | 0.160<br>±0.028 | 0.280<br>±0.054  | 0.105<br>±0.050 | 0.158<br>±0.058 | 0.185<br>±0.033 | 0.154<br>±0.038 | 0.038<br>±0.006 | 0.042<br>±0.027 | 0.039<br>±0.010 | 0.051<br>±0.011 | 0.102<br>±0.030 | 0.298<br>±0.059 | 0.028<br>±0.007 | 0.296<br>±0.024   | 0.029<br>±0.018   | 0.515<br>± 0.047  | 0.026<br>±0.011   | 0.446<br>± 0.041  | 0.047<br>±0.010  |
|                        | Acc.2           | 0.366<br>±0.059 | 0.274<br>±0.052 | 0.250<br>±0.034 | 0.453<br>±0.059  | 0.181<br>±0.075 | 0.255<br>±0.078 | 0.322<br>±0.055 | 0.254<br>±0.073 | 0.070<br>±0.010 | 0.083<br>±0.034 | 0.075<br>±0.029 | 0.090<br>±0.017 | 0.178<br>±0.045 | 0.416<br>±0.079 | 0.055<br>±0.007 | 0.419<br>±0.016   | 0.058<br>±0.020   | 0.678<br>± 0.034  | 0.055<br>±0.023   | 0.603<br>± 0.058  | 0.089<br>±0.008  |
|                        | Subject20_async | κ               | 0.286<br>±0.051 | 0.279<br>±0.040 | 0.256<br>±0.049  | 0.444<br>±0.056 | 0.176<br>±0.106 | 0.356<br>±0.054 | 0.333<br>±0.044 | 0.287<br>±0.018 | 0.057<br>±0.018 | 0.063<br>±0.017 | 0.073<br>±0.016 | 0.100<br>±0.026 | 0.282<br>±0.041 | 0.540<br>±0.088 | 0.010<br>±0.012   | 0.542<br>±0.049   | 0.031<br>±0.025   | 0.660<br>± 0.075  | 0.037<br>±0.018   | 0.637<br>± 0.060 |
| AUC                    |                 | 0.890<br>±0.012 | 0.894<br>±0.027 | 0.871<br>±0.026 | 0.942<br>±0.011  | 0.777<br>±0.156 | 0.857<br>±0.019 | 0.913<br>±0.017 | 0.846<br>±0.006 | 0.711<br>±0.021 | 0.671<br>±0.025 | 0.725<br>±0.028 | 0.704<br>±0.018 | 0.881<br>±0.010 | 0.911<br>±0.034 | 0.568<br>±0.031 | 0.898<br>±0.027   | 0.657<br>±0.023   | 0.963<br>± 0.014  | 0.673<br>±0.012   | 0.949<br>± 0.016  | 0.744<br>±0.032  |
| BAcc                   |                 | 0.304<br>±0.050 | 0.297<br>±0.039 | 0.275<br>±0.047 | 0.458<br>±0.055  | 0.197<br>±0.104 | 0.372<br>±0.053 | 0.350<br>±0.043 | 0.305<br>±0.018 | 0.080<br>±0.018 | 0.086<br>±0.016 | 0.096<br>±0.015 | 0.122<br>±0.025 | 0.300<br>±0.040 | 0.551<br>±0.086 | 0.035<br>±0.012 | 0.554<br>±0.048   | 0.055<br>±0.024   | 0.668<br>± 0.074  | 0.061<br>±0.017   | 0.646<br>± 0.058  | 0.093<br>±0.033  |
| Acc.1                  |                 | 0.304<br>±0.050 | 0.297<br>±0.039 | 0.275<br>±0.047 | 0.458<br>±0.055  | 0.197<br>±0.104 | 0.373<br>±0.056 | 0.350<br>±0.046 | 0.305<br>±0.017 | 0.081<br>±0.018 | 0.087<br>±0.015 | 0.097<br>±0.017 | 0.122<br>±0.026 | 0.301<br>±0.042 | 0.556<br>±0.085 | 0.036<br>±0.013 | 0.554<br>±0.050   | 0.055<br>±0.024   | 0.670<br>± 0.073  | 0.061<br>±0.018   | 0.648<br>± 0.061  | 0.092<br>±0.033  |
| Continued on next page |                 |                 |                 |                 |                  |                 |                 |                 |                 |                 |                 |                 |                 |                 |                 |                 |                   |                   |                   |                   |                   |                  |

5769  
5770  
5771  
5772  
5773  
5774  
5775  
5776  
5777  
5778  
5779  
5780  
5781  
5782  
5783  
5784  
5785  
5786  
5787  
5788  
5789  
5790  
5791  
5792  
5793  
5794  
5795  
5796  
5797  
5798  
5799  
5800  
5801

| Subject         | Metric   | DeepConvnet                    | EEGNet          | Conformer       | CTNet                          | SSVEPDNN        | BIOT <sup>(f)</sup> | BIOT <sup>(l)</sup> | BENDR <sup>(f)</sup> | BENDR <sup>(l)</sup> | CBraMod <sup>(f)</sup> | CBraMod <sup>(l)</sup> | EEGPT <sup>(f)</sup> | EEGPT <sup>(l)</sup> | LaBraM <sup>(f)</sup> | LaBraM <sup>(l)</sup> | STEEGformer-s <sup>(f)</sup> | STEEGformer-s <sup>(l)</sup> | STEEGformer-h <sup>(f)</sup>   | STEEGformer-h <sup>(l)</sup> | STEEGformer-l <sup>(f)</sup>   | Underreview     |
|-----------------|----------|--------------------------------|-----------------|-----------------|--------------------------------|-----------------|---------------------|---------------------|----------------------|----------------------|------------------------|------------------------|----------------------|----------------------|-----------------------|-----------------------|------------------------------|------------------------------|--------------------------------|------------------------------|--------------------------------|-----------------|
| Subject21_async | Acc.2    | 0.445<br>±0.041                | 0.441<br>±0.057 | 0.402<br>±0.062 | 0.609<br>±0.045                | 0.303<br>±0.149 | 0.541<br>±0.060     | 0.565<br>±0.056     | 0.431<br>±0.010      | 0.144<br>±0.023      | 0.200<br>±0.024        | 0.175<br>±0.025        | 0.199<br>±0.028      | 0.436<br>±0.032      | 0.684<br>±0.074       | 0.076<br>±0.007       | 0.687<br>±0.042              | 0.093<br>±0.031              | 0.797<br>± 0.055               | 0.102<br>±0.018              | <b>0.775</b><br>± <b>0.040</b> | 0.751<br>±0.022 |
|                 | $\kappa$ | 0.478<br>±0.050                | 0.406<br>±0.038 | 0.343<br>±0.056 | 0.522<br>±0.048                | 0.208<br>±0.117 | 0.328<br>±0.044     | 0.297<br>±0.038     | 0.433<br>±0.015      | 0.041<br>±0.013      | 0.100<br>±0.028        | 0.009<br>±0.007        | 0.119<br>±0.023      | 0.344<br>±0.017      | 0.522<br>±0.066       | 0.009<br>±0.008       | 0.524<br>±0.025              | 0.046<br>±0.027              | 0.669<br>± 0.045               | 0.040<br>±0.017              | <b>0.653</b><br>± <b>0.070</b> | 0.711<br>±0.032 |
|                 | AUC      | 0.962<br>±0.008                | 0.943<br>±0.013 | 0.909<br>±0.020 | <b>0.965</b><br>± <b>0.011</b> | 0.823<br>±0.181 | 0.838<br>±0.014     | 0.917<br>±0.020     | 0.922<br>±0.012      | 0.690<br>±0.024      | 0.721<br>±0.015        | 0.600<br>±0.057        | 0.731<br>±0.020      | 0.919<br>±0.008      | 0.933<br>±0.015       | 0.561<br>±0.023       | 0.915<br>±0.012              | 0.676<br>±0.033              | 0.968<br>± 0.012               | 0.671<br>±0.025              | 0.956<br>±0.010                | 0.952<br>±0.033 |
|                 | BAcc     | 0.491<br>±0.049                | 0.421<br>±0.037 | 0.359<br>±0.055 | 0.534<br>±0.046                | 0.228<br>±0.114 | 0.345<br>±0.043     | 0.314<br>±0.037     | 0.447<br>±0.014      | 0.065<br>±0.013      | 0.122<br>±0.027        | 0.034<br>±0.007        | 0.141<br>±0.022      | 0.360<br>±0.016      | 0.534<br>±0.064       | 0.034<br>±0.008       | 0.536<br>±0.024              | 0.070<br>±0.027              | 0.677<br>± 0.044               | 0.064<br>±0.017              | <b>0.662</b><br>± <b>0.068</b> | 0.744<br>±0.031 |
|                 | Acc.1    | 0.491<br>±0.049                | 0.421<br>±0.037 | 0.359<br>±0.055 | 0.534<br>±0.046                | 0.228<br>±0.114 | 0.342<br>±0.042     | 0.311<br>±0.037     | 0.447<br>±0.017      | 0.066<br>±0.013      | 0.123<br>±0.030        | 0.038<br>±0.010        | 0.142<br>±0.022      | 0.362<br>±0.016      | 0.532<br>±0.062       | 0.033<br>±0.008       | 0.531<br>±0.020              | 0.069<br>±0.026              | 0.673<br>± 0.041               | 0.063<br>±0.017              | <b>0.658</b><br>± <b>0.065</b> | 0.733<br>±0.031 |
|                 | Acc.2    | 0.686<br>±0.044                | 0.594<br>±0.051 | 0.499<br>±0.068 | 0.719<br>±0.055                | 0.356<br>±0.172 | 0.549<br>±0.026     | 0.503<br>±0.046     | 0.590<br>±0.028      | 0.118<br>±0.023      | 0.226<br>±0.037        | 0.082<br>±0.016        | 0.217<br>±0.030      | 0.514<br>±0.018      | 0.704<br>±0.048       | 0.070<br>±0.010       | 0.708<br>±0.024              | 0.116<br>±0.021              | 0.817<br>± 0.034               | 0.108<br>±0.015              | <b>0.812</b><br>± <b>0.036</b> | 0.739<br>±0.031 |
|                 | $\kappa$ | 0.638<br>±0.035                | 0.549<br>±0.063 | 0.491<br>±0.034 | 0.649<br>±0.037                | 0.299<br>±0.182 | 0.584<br>±0.073     | 0.475<br>±0.035     | 0.528<br>±0.053      | 0.055<br>±0.013      | 0.083<br>±0.037        | 0.041<br>±0.007        | 0.154<br>±0.021      | 0.427<br>±0.045      | 0.560<br>±0.029       | 0.020<br>±0.011       | 0.576<br>±0.032              | 0.024<br>±0.012              | <b>0.705</b><br>± <b>0.040</b> | 0.032<br>±0.020              | 0.732<br>± 0.065               | 0.725<br>±0.038 |
|                 | AUC      | 0.982<br>± 0.003               | 0.966<br>±0.010 | 0.958<br>±0.009 | <b>0.981</b><br>± <b>0.003</b> | 0.840<br>±0.191 | 0.941<br>±0.024     | 0.974<br>±0.005     | 0.958<br>±0.011      | 0.701<br>±0.024      | 0.695<br>±0.028        | 0.675<br>±0.017        | 0.765<br>±0.026      | 0.941<br>±0.007      | 0.938<br>±0.008       | 0.585<br>±0.027       | 0.924<br>±0.020              | 0.657<br>±0.035              | 0.980<br>±0.007                | 0.672<br>±0.020              | 0.975<br>±0.016                | 0.747<br>±0.044 |
|                 | BAcc     | 0.647<br>±0.034                | 0.560<br>±0.061 | 0.504<br>±0.034 | 0.658<br>±0.036                | 0.317<br>±0.177 | 0.594<br>±0.071     | 0.488<br>±0.035     | 0.540<br>±0.051      | 0.079<br>±0.013      | 0.106<br>±0.036        | 0.065<br>±0.007        | 0.175<br>±0.021      | 0.441<br>±0.044      | 0.571<br>±0.028       | 0.044<br>±0.011       | 0.586<br>±0.031              | 0.049<br>±0.011              | <b>0.712</b><br>± <b>0.039</b> | 0.056<br>±0.019              | 0.739<br>± 0.063               | 0.069<br>±0.008 |
|                 | Acc.1    | 0.647<br>±0.034                | 0.560<br>±0.061 | 0.504<br>±0.034 | 0.658<br>±0.036                | 0.317<br>±0.177 | 0.594<br>±0.071     | 0.488<br>±0.036     | 0.540<br>±0.049      | 0.078<br>±0.012      | 0.105<br>±0.035        | 0.066<br>±0.007        | 0.176<br>±0.021      | 0.443<br>±0.043      | 0.575<br>±0.030       | 0.045<br>±0.012       | 0.589<br>±0.029              | 0.050<br>±0.012              | <b>0.714</b><br>± <b>0.038</b> | 0.056<br>±0.020              | 0.742<br>± 0.063               | 0.068<br>±0.008 |
|                 | Acc.2    | 0.818<br>±0.023                | 0.734<br>±0.051 | 0.662<br>±0.028 | 0.847<br>±0.030                | 0.450<br>±0.232 | 0.829<br>±0.047     | 0.754<br>±0.043     | 0.710<br>±0.043      | 0.135<br>±0.018      | 0.197<br>±0.026        | 0.122<br>±0.007        | 0.280<br>±0.038      | 0.611<br>±0.025      | 0.745<br>±0.014       | 0.080<br>±0.009       | 0.752<br>±0.058              | 0.104<br>±0.018              | <b>0.868</b><br>± <b>0.023</b> | 0.102<br>±0.025              | 0.885<br>± 0.040               | 0.119<br>±0.010 |
| Subject23_async | $\kappa$ | 0.028<br>±0.017                | 0.039<br>±0.017 | 0.041<br>±0.015 | 0.033<br>±0.016                | 0.021<br>±0.017 | 0.039<br>±0.025     | 0.009<br>±0.013     | 0.022<br>±0.011      | 0.025<br>±0.012      | 0.042<br>±0.024        | 0.026<br>±0.012        | 0.035<br>±0.008      | 0.058<br>±0.019      | 0.052<br>±0.023       | 0.004<br>±0.005       | 0.080<br>±0.057              | 0.007<br>±0.008              | <b>0.087</b><br>± <b>0.049</b> | -0.002<br>±0.009             | 0.092<br>± 0.038               | 0.003<br>±0.011 |
|                 | AUC      | <b>0.693</b><br>± <b>0.034</b> | 0.689<br>±0.035 | 0.690<br>±0.030 | 0.671<br>±0.032                | 0.592<br>±0.057 | 0.592<br>±0.028     | 0.533<br>±0.014     | 0.602<br>±0.025      | 0.658<br>±0.024      | 0.620<br>±0.063        | 0.678<br>±0.014        | 0.602<br>±0.013      | 0.693<br>± 0.026     | 0.641<br>±0.034       | 0.529<br>±0.008       | 0.612<br>±0.056              | 0.556<br>±0.017              | 0.661<br>±0.052                | 0.536<br>±0.029              | 0.668<br>±0.052                | 0.564<br>±0.037 |
|                 | BAcc     | 0.052<br>±0.016                | 0.063<br>±0.016 | 0.065<br>±0.015 | 0.057<br>±0.016                | 0.045<br>±0.017 | 0.063<br>±0.024     | 0.034<br>±0.013     | 0.046<br>±0.011      | 0.050<br>±0.012      | 0.066<br>±0.024        | 0.050<br>±0.012        | 0.059<br>±0.008      | 0.082<br>±0.018      | 0.076<br>±0.023       | 0.029<br>±0.005       | 0.103<br>±0.056              | 0.032<br>±0.008              | <b>0.110</b><br>± <b>0.048</b> | 0.023<br>±0.009              | 0.115<br>± 0.037               | 0.028<br>±0.011 |
|                 | Acc.1    | 0.052<br>±0.016                | 0.063<br>±0.016 | 0.065<br>±0.015 | 0.057<br>±0.016                | 0.045<br>±0.017 | 0.063<br>±0.024     | 0.034<br>±0.012     | 0.047<br>±0.012      | 0.050<br>±0.012      | 0.066<br>±0.024        | 0.051<br>±0.012        | 0.059<br>±0.008      | 0.085<br>±0.018      | 0.076<br>±0.023       | 0.029<br>±0.005       | 0.102<br>±0.055              | 0.032<br>±0.007              | <b>0.109</b><br>± <b>0.047</b> | 0.023<br>±0.009              | 0.114<br>± 0.038               | 0.027<br>±0.011 |
|                 |          |                                |                 |                 |                                |                 |                     |                     |                      |                      |                        |                        |                      |                      |                       |                       |                              |                              |                                |                              |                                |                 |

Continued on next page

| Subject         | Metric          | DeepConvnet     | EEGNet          | Conformer       | CTNet           | SSVEPDNN        | BIOT (f)        | BIOT (l)        | BENDR (f)       | BENDR (l)       | CBraMod (f)     | CBraMod (l)     | EEGPT (f)       | EEGPT (l)       | LaBraM (f)      | LaBraM (l)      | STEEGformer-s (f) | STEEGformer-s (l) | STEEGformer-b (f) | STEEGformer-b (l) | STEEGformer-l (f) | STEEGformer-l (l) | Univariate      |
|-----------------|-----------------|-----------------|-----------------|-----------------|-----------------|-----------------|-----------------|-----------------|-----------------|-----------------|-----------------|-----------------|-----------------|-----------------|-----------------|-----------------|-------------------|-------------------|-------------------|-------------------|-------------------|-------------------|-----------------|
| Subject24_async | Acc.2           | 0.104<br>±0.019 | 0.115<br>±0.007 | 0.111<br>±0.013 | 0.113<br>±0.010 | 0.085<br>±0.023 | 0.125<br>±0.026 | 0.072<br>±0.012 | 0.093<br>±0.016 | 0.100<br>±0.016 | 0.127<br>±0.042 | 0.106<br>±0.017 | 0.105<br>±0.006 | 0.142<br>±0.015 | 0.155<br>±0.041 | 0.066<br>±0.011 | 0.177<br>±0.063   | 0.061<br>±0.014   | 0.196<br>± 0.066  | 0.050<br>±0.009   | 0.210<br>± 0.072  | 0.260<br>±0.008   |                 |
|                 | κ               | 0.088<br>±0.021 | 0.061<br>±0.008 | 0.100<br>±0.006 | 0.114<br>±0.018 | 0.032<br>±0.021 | 0.073<br>±0.033 | 0.059<br>±0.024 | 0.058<br>±0.028 | 0.029<br>±0.005 | 0.060<br>±0.013 | 0.034<br>±0.007 | 0.032<br>±0.017 | 0.084<br>±0.016 | 0.275<br>±0.055 | 0.007<br>±0.011 | 0.265<br>±0.036   | 0.025<br>±0.016   | 0.431<br>± 0.064  | -0.000<br>±0.011  | 0.395<br>± 0.042  | 0.422<br>±0.026   |                 |
|                 | AUC             | 0.728<br>±0.019 | 0.714<br>±0.031 | 0.739<br>±0.025 | 0.773<br>±0.016 | 0.636<br>±0.082 | 0.640<br>±0.038 | 0.695<br>±0.014 | 0.641<br>±0.026 | 0.619<br>±0.026 | 0.629<br>±0.034 | 0.684<br>±0.009 | 0.612<br>±0.007 | 0.757<br>±0.017 | 0.796<br>±0.033 | 0.545<br>±0.017 | 0.775<br>±0.024   | 0.630<br>±0.034   | 0.914<br>± 0.016  | 0.635<br>±0.021   | 0.864<br>± 0.024  | 0.833<br>±0.021   |                 |
|                 | BAcc            | 0.111<br>±0.021 | 0.084<br>±0.008 | 0.123<br>±0.006 | 0.136<br>±0.018 | 0.056<br>±0.020 | 0.096<br>±0.032 | 0.082<br>±0.023 | 0.082<br>±0.027 | 0.054<br>±0.005 | 0.083<br>±0.013 | 0.058<br>±0.007 | 0.056<br>±0.017 | 0.107<br>±0.016 | 0.293<br>±0.053 | 0.031<br>±0.010 | 0.283<br>±0.035   | 0.049<br>±0.015   | 0.445<br>± 0.063  | 0.025<br>±0.011   | 0.410<br>± 0.041  | 0.466<br>±0.026   |                 |
|                 | Acc.1           | 0.111<br>±0.021 | 0.084<br>±0.008 | 0.123<br>±0.006 | 0.136<br>±0.018 | 0.056<br>±0.020 | 0.097<br>±0.034 | 0.082<br>±0.024 | 0.082<br>±0.028 | 0.053<br>±0.005 | 0.085<br>±0.015 | 0.061<br>±0.009 | 0.056<br>±0.017 | 0.107<br>±0.016 | 0.295<br>±0.052 | 0.032<br>±0.010 | 0.284<br>±0.037   | 0.048<br>±0.015   | 0.447<br>± 0.062  | 0.024<br>±0.010   | 0.413<br>± 0.041  | 0.466<br>±0.025   |                 |
|                 | Acc.2           | 0.182<br>±0.026 | 0.155<br>±0.017 | 0.209<br>±0.010 | 0.220<br>±0.020 | 0.116<br>±0.039 | 0.174<br>±0.038 | 0.151<br>±0.030 | 0.150<br>±0.035 | 0.100<br>±0.008 | 0.146<br>±0.026 | 0.120<br>±0.015 | 0.104<br>±0.023 | 0.177<br>±0.025 | 0.417<br>±0.064 | 0.062<br>±0.008 | 0.399<br>±0.028   | 0.080<br>±0.018   | 0.602<br>± 0.057  | 0.061<br>±0.010   | 0.561<br>± 0.041  | 0.605<br>±0.022   |                 |
| Subject25_async | κ               | 0.056<br>±0.012 | 0.055<br>±0.019 | 0.042<br>±0.017 | 0.041<br>±0.015 | 0.056<br>±0.035 | 0.098<br>±0.028 | 0.009<br>±0.009 | 0.137<br>±0.033 | 0.018<br>±0.005 | 0.154<br>±0.028 | 0.059<br>±0.015 | 0.046<br>±0.020 | 0.067<br>±0.020 | 0.202<br>±0.028 | 0.007<br>±0.010 | 0.236<br>±0.024   | 0.027<br>±0.017   | 0.334<br>± 0.020  | 0.010<br>±0.010   | 0.334<br>± 0.041  | 0.291<br>±0.012   |                 |
|                 | AUC             | 0.767<br>±0.015 | 0.735<br>±0.030 | 0.783<br>±0.021 | 0.684<br>±0.027 | 0.725<br>±0.128 | 0.670<br>±0.040 | 0.579<br>±0.042 | 0.732<br>±0.019 | 0.600<br>±0.013 | 0.766<br>±0.031 | 0.781<br>±0.013 | 0.655<br>±0.022 | 0.723<br>±0.017 | 0.757<br>±0.026 | 0.571<br>±0.051 | 0.746<br>±0.024   | 0.638<br>±0.042   | 0.841<br>± 0.005  | 0.595<br>±0.035   | 0.837<br>± 0.014  | 0.655<br>±0.038   |                 |
|                 | BAcc            | 0.080<br>±0.011 | 0.078<br>±0.018 | 0.066<br>±0.017 | 0.065<br>±0.015 | 0.080<br>±0.034 | 0.121<br>±0.027 | 0.034<br>±0.009 | 0.158<br>±0.032 | 0.042<br>±0.005 | 0.175<br>±0.027 | 0.082<br>±0.015 | 0.070<br>±0.020 | 0.090<br>±0.019 | 0.222<br>±0.027 | 0.032<br>±0.010 | 0.255<br>±0.024   | 0.051<br>±0.017   | 0.350<br>± 0.020  | 0.035<br>±0.010   | 0.351<br>± 0.040  | 0.046<br>±0.012   |                 |
|                 | Acc.1           | 0.080<br>±0.011 | 0.078<br>±0.018 | 0.066<br>±0.017 | 0.065<br>±0.015 | 0.080<br>±0.034 | 0.120<br>±0.028 | 0.036<br>±0.010 | 0.160<br>±0.036 | 0.042<br>±0.006 | 0.177<br>±0.025 | 0.081<br>±0.016 | 0.069<br>±0.020 | 0.093<br>±0.020 | 0.225<br>±0.027 | 0.032<br>±0.010 | 0.256<br>±0.028   | 0.052<br>±0.016   | 0.351<br>± 0.020  | 0.036<br>±0.011   | 0.355<br>± 0.040  | 0.045<br>±0.013   |                 |
|                 | Acc.2           | 0.158<br>±0.014 | 0.138<br>±0.034 | 0.146<br>±0.025 | 0.122<br>±0.029 | 0.151<br>±0.059 | 0.223<br>±0.059 | 0.078<br>±0.021 | 0.259<br>±0.033 | 0.078<br>±0.005 | 0.282<br>±0.042 | 0.178<br>±0.015 | 0.129<br>±0.024 | 0.159<br>±0.023 | 0.348<br>±0.033 | 0.070<br>±0.020 | 0.379<br>±0.046   | 0.086<br>±0.014   | 0.475<br>± 0.036  | 0.066<br>±0.009   | 0.478<br>± 0.043  | 0.106<br>±0.024   |                 |
|                 | Subject26_async | κ               | 0.158<br>±0.057 | 0.164<br>±0.050 | 0.170<br>±0.028 | 0.324<br>±0.019 | 0.124<br>±0.070 | 0.399<br>±0.032 | 0.191<br>±0.051 | 0.313<br>±0.052 | 0.029<br>±0.010 | 0.037<br>±0.006 | 0.041<br>±0.017 | 0.063<br>±0.024 | 0.095<br>±0.012 | 0.299<br>±0.032 | 0.007<br>±0.008   | 0.334<br>±0.037   | 0.015<br>±0.013   | 0.585<br>± 0.039  | 0.014<br>±0.014   | 0.571<br>± 0.025  | 0.035<br>±0.010 |
| AUC             |                 | 0.831<br>±0.021 | 0.835<br>±0.032 | 0.845<br>±0.021 | 0.912<br>±0.015 | 0.750<br>±0.141 | 0.882<br>±0.014 | 0.849<br>±0.022 | 0.867<br>±0.025 | 0.668<br>±0.015 | 0.638<br>±0.018 | 0.683<br>±0.021 | 0.650<br>±0.022 | 0.802<br>±0.016 | 0.817<br>±0.020 | 0.544<br>±0.015 | 0.815<br>±0.021   | 0.600<br>±0.025   | 0.958<br>± 0.010  | 0.631<br>±0.025   | 0.941<br>± 0.013  | 0.678<br>±0.022   |                 |
| BAcc            |                 | 0.179<br>±0.056 | 0.185<br>±0.048 | 0.191<br>±0.027 | 0.341<br>±0.018 | 0.145<br>±0.068 | 0.414<br>±0.032 | 0.211<br>±0.050 | 0.330<br>±0.050 | 0.053<br>±0.009 | 0.061<br>±0.006 | 0.065<br>±0.017 | 0.087<br>±0.023 | 0.117<br>±0.012 | 0.317<br>±0.031 | 0.031<br>±0.008 | 0.351<br>±0.036   | 0.040<br>±0.013   | 0.595<br>± 0.038  | 0.038<br>±0.014   | 0.582<br>± 0.024  | 0.060<br>±0.010   |                 |
| Acc.1           |                 | 0.179<br>±0.056 | 0.185<br>±0.048 | 0.191<br>±0.027 | 0.341<br>±0.018 | 0.145<br>±0.068 | 0.414<br>±0.032 | 0.212<br>±0.051 | 0.331<br>±0.050 | 0.054<br>±0.010 | 0.064<br>±0.005 | 0.066<br>±0.017 | 0.088<br>±0.025 | 0.119<br>±0.013 | 0.318<br>±0.034 | 0.032<br>±0.008 | 0.353<br>±0.039   | 0.040<br>±0.013   | 0.594<br>± 0.037  | 0.039<br>±0.014   | 0.581<br>± 0.026  | 0.060<br>±0.010   |                 |

Continued on next page

Continued on next page

| Subject                | Metric          | DeepConvnet      | EEGNet           | Conformer        | CTNet            | SSVEPDNN         | BIOT (f)         | BIOT (l)        | BENDR (f)       | BENDR (l)       | CBraMod (f)     | CBraMod (l)     | EEGPT (f)       | EEGPT (l)       | LaBraM (f)       | LaBraM (l)      | STEEGformer-s (f) | STEEGformer-s (l) | STEEGformer-b (f) | STEEGformer-b (l) | STEEGformer-l (f) | STEEGformer-l (l) | Univariate       |
|------------------------|-----------------|------------------|------------------|------------------|------------------|------------------|------------------|-----------------|-----------------|-----------------|-----------------|-----------------|-----------------|-----------------|------------------|-----------------|-------------------|-------------------|-------------------|-------------------|-------------------|-------------------|------------------|
| Subject27_async        | Acc.2           | 0.299<br>±0.063  | 0.285<br>±0.042  | 0.312<br>±0.043  | 0.517<br>±0.028  | 0.239<br>±0.108  | 0.612<br>±0.049  | 0.362<br>±0.078 | 0.477<br>±0.066 | 0.106<br>±0.020 | 0.128<br>±0.015 | 0.118<br>±0.031 | 0.143<br>±0.032 | 0.225<br>±0.028 | 0.450<br>±0.040  | 0.057<br>±0.017 | 0.495<br>±0.050   | 0.082<br>±0.021   | 0.755<br>± 0.013  | 0.081<br>±0.023   | 0.740<br>± 0.031  | 0.507<br>±0.016   |                  |
|                        |                 | κ                | 0.166<br>±0.052  | 0.125<br>±0.043  | 0.111<br>±0.049  | 0.182<br>±0.039  | 0.059<br>±0.038  | 0.093<br>±0.026 | 0.081<br>±0.014 | 0.131<br>±0.039 | 0.032<br>±0.013 | 0.041<br>±0.021 | 0.037<br>±0.024 | 0.019<br>±0.010 | 0.109<br>±0.025  | 0.186<br>±0.031 | -0.003<br>±0.007  | 0.156<br>±0.035   | -0.000<br>±0.012  | 0.283<br>± 0.033  | 0.010<br>±0.013   | 0.248<br>± 0.020  | 0.308<br>±0.016  |
|                        | AUC             | 0.816<br>± 0.018 | 0.783<br>±0.031  | 0.756<br>±0.018  | 0.815<br>±0.013  | 0.679<br>±0.101  | 0.638<br>±0.011  | 0.728<br>±0.037 | 0.736<br>±0.036 | 0.639<br>±0.020 | 0.626<br>±0.019 | 0.666<br>±0.018 | 0.601<br>±0.031 | 0.760<br>±0.025 | 0.746<br>±0.021  | 0.506<br>±0.007 | 0.688<br>±0.025   | 0.556<br>±0.021   | 0.825<br>± 0.020  | 0.535<br>±0.036   | 0.781<br>±0.018   | 0.777<br>±0.026   |                  |
|                        |                 | BAcc             | 0.187<br>±0.051  | 0.147<br>±0.042  | 0.133<br>±0.048  | 0.203<br>±0.038  | 0.082<br>±0.037  | 0.116<br>±0.026 | 0.104<br>±0.013 | 0.152<br>±0.038 | 0.056<br>±0.013 | 0.065<br>±0.020 | 0.061<br>±0.024 | 0.044<br>±0.009 | 0.131<br>±0.024  | 0.207<br>±0.031 | 0.022<br>±0.007   | 0.177<br>±0.034   | 0.025<br>±0.012   | 0.300<br>± 0.032  | 0.035<br>±0.013   | 0.267<br>± 0.020  | 0.322<br>±0.016  |
|                        | Acc.1           | 0.187<br>±0.051  | 0.147<br>±0.042  | 0.133<br>±0.048  | 0.203<br>±0.038  | 0.082<br>±0.037  | 0.115<br>±0.025  | 0.105<br>±0.013 | 0.152<br>±0.039 | 0.056<br>±0.013 | 0.064<br>±0.019 | 0.061<br>±0.023 | 0.044<br>±0.010 | 0.130<br>±0.024 | 0.205<br>±0.031  | 0.022<br>±0.007 | 0.178<br>±0.035   | 0.025<br>±0.012   | 0.300<br>± 0.030  | 0.036<br>±0.013   | 0.267<br>± 0.019  | 0.322<br>±0.015   |                  |
|                        |                 | Acc.2            | 0.298<br>±0.066  | 0.268<br>±0.056  | 0.216<br>±0.059  | 0.311<br>±0.053  | 0.146<br>±0.065  | 0.175<br>±0.030 | 0.183<br>±0.019 | 0.241<br>±0.053 | 0.100<br>±0.014 | 0.118<br>±0.028 | 0.118<br>±0.027 | 0.089<br>±0.020 | 0.220<br>±0.033  | 0.310<br>±0.046 | 0.045<br>±0.011   | 0.288<br>±0.042   | 0.053<br>±0.009   | 0.432<br>± 0.039  | 0.066<br>±0.018   | 0.382<br>± 0.014  | 0.328<br>±0.022  |
|                        | Subject28_async | κ                | 0.186<br>± 0.074 | 0.131<br>±0.043  | 0.126<br>±0.032  | 0.221<br>± 0.079 | 0.069<br>±0.048  | 0.105<br>±0.023 | 0.087<br>±0.041 | 0.099<br>±0.031 | 0.028<br>±0.017 | 0.076<br>±0.025 | 0.027<br>±0.021 | 0.024<br>±0.013 | 0.103<br>±0.045  | 0.121<br>±0.060 | 0.010<br>±0.009   | 0.125<br>±0.066   | 0.022<br>±0.015   | 0.173<br>±0.058   | 0.029<br>±0.013   | 0.166<br>±0.064   | 0.237<br>±0.023  |
|                        |                 |                  | AUC              | 0.828<br>± 0.041 | 0.794<br>±0.021  | 0.793<br>±0.040  | 0.824<br>± 0.041 | 0.681<br>±0.106 | 0.650<br>±0.049 | 0.708<br>±0.041 | 0.701<br>±0.023 | 0.645<br>±0.014 | 0.696<br>±0.038 | 0.618<br>±0.043 | 0.578<br>±0.020  | 0.765<br>±0.030 | 0.709<br>±0.054   | 0.560<br>±0.042   | 0.661<br>±0.039   | 0.636<br>±0.024   | 0.759<br>±0.040   | 0.607<br>±0.026   | 0.746<br>±0.028  |
|                        |                 | BAcc             | 0.206<br>± 0.072 | 0.153<br>±0.042  | 0.148<br>±0.031  | 0.240<br>± 0.077 | 0.092<br>±0.047  | 0.128<br>±0.022 | 0.110<br>±0.040 | 0.122<br>±0.031 | 0.052<br>±0.017 | 0.100<br>±0.025 | 0.051<br>±0.021 | 0.048<br>±0.012 | 0.125<br>±0.044  | 0.143<br>±0.059 | 0.035<br>±0.009   | 0.147<br>±0.064   | 0.047<br>±0.015   | 0.194<br>±0.057   | 0.054<br>±0.013   | 0.187<br>±0.062   | 0.067<br>±0.023  |
|                        |                 |                  | Acc.1            | 0.206<br>± 0.072 | 0.153<br>±0.042  | 0.148<br>±0.031  | 0.240<br>± 0.077 | 0.092<br>±0.047 | 0.128<br>±0.022 | 0.109<br>±0.039 | 0.124<br>±0.032 | 0.052<br>±0.017 | 0.101<br>±0.022 | 0.052<br>±0.022 | 0.048<br>±0.012  | 0.125<br>±0.045 | 0.144<br>±0.059   | 0.036<br>±0.010   | 0.147<br>±0.066   | 0.046<br>±0.015   | 0.195<br>±0.058   | 0.054<br>±0.012   | 0.187<br>±0.064  |
| Acc.2                  |                 | 0.334<br>± 0.099 | 0.260<br>±0.048  | 0.259<br>±0.041  | 0.352<br>± 0.089 | 0.160<br>±0.081  | 0.205<br>±0.036  | 0.191<br>±0.059 | 0.207<br>±0.033 | 0.110<br>±0.011 | 0.179<br>±0.022 | 0.088<br>±0.023 | 0.093<br>±0.011 | 0.224<br>±0.052 | 0.247<br>±0.079  | 0.066<br>±0.017 | 0.221<br>±0.075   | 0.090<br>±0.019   | 0.296<br>±0.088   | 0.091<br>±0.016   | 0.296<br>±0.080   | 0.120<br>±0.032   |                  |
|                        |                 | Subject29_async  | κ                | 0.059<br>±0.028  | 0.053<br>±0.023  | 0.051<br>±0.026  | 0.051<br>±0.014  | 0.039<br>±0.035 | 0.026<br>±0.012 | 0.017<br>±0.014 | 0.032<br>±0.013 | 0.020<br>±0.014 | 0.049<br>±0.024 | 0.042<br>±0.020 | 0.021<br>±0.011  | 0.058<br>±0.025 | 0.080<br>±0.021   | 0.002<br>±0.009   | 0.065<br>±0.034   | 0.019<br>±0.016   | 0.117<br>± 0.027  | 0.010<br>±0.024   | 0.097<br>± 0.040 |
| AUC                    | 0.680<br>±0.042 |                  |                  | 0.676<br>±0.041  | 0.651<br>±0.020  | 0.643<br>±0.028  | 0.623<br>±0.072  | 0.553<br>±0.024 | 0.545<br>±0.026 | 0.600<br>±0.024 | 0.598<br>±0.030 | 0.607<br>±0.035 | 0.658<br>±0.021 | 0.584<br>±0.024 | 0.694<br>± 0.026 | 0.631<br>±0.038 | 0.524<br>±0.019   | 0.598<br>±0.029   | 0.566<br>±0.033   | 0.700<br>± 0.023  | 0.546<br>±0.019   | 0.665<br>±0.036   | 0.563<br>±0.023  |
| BAcc                   | 0.083<br>±0.028 |                  | 0.077<br>±0.023  | 0.075<br>±0.026  | 0.075<br>±0.014  | 0.063<br>±0.034  | 0.050<br>±0.011  | 0.042<br>±0.014 | 0.056<br>±0.012 | 0.044<br>±0.014 | 0.073<br>±0.023 | 0.066<br>±0.020 | 0.046<br>±0.011 | 0.081<br>±0.024 | 0.103<br>±0.021  | 0.027<br>±0.009 | 0.088<br>±0.033   | 0.043<br>±0.015   | 0.140<br>± 0.026  | 0.035<br>±0.023   | 0.120<br>± 0.039  | 0.033<br>±0.015   |                  |
|                        | Acc.1           |                  | 0.083<br>±0.028  | 0.077<br>±0.023  | 0.075<br>±0.026  | 0.075<br>±0.014  | 0.063<br>±0.034  | 0.051<br>±0.011 | 0.042<br>±0.014 | 0.056<br>±0.013 | 0.044<br>±0.013 | 0.073<br>±0.023 | 0.067<br>±0.020 | 0.047<br>±0.011 | 0.082<br>±0.024  | 0.105<br>±0.020 | 0.027<br>±0.008   | 0.090<br>±0.034   | 0.044<br>±0.015   | 0.140<br>± 0.028  | 0.036<br>±0.023   | 0.122<br>± 0.039  | 0.033<br>±0.014  |
| Continued on next page |                 |                  |                  |                  |                  |                  |                  |                 |                 |                 |                 |                 |                 |                 |                  |                 |                   |                   |                   |                   |                   |                   |                  |

Continued on next page



| Subject         | Metric   | DeepConvnet                    | EEGNet          | Conformer       | CTNet                          | SSVEPDNN        | BIOT <sup>(f)</sup> | BIOT <sup>(l)</sup> | BENDR <sup>(f)</sup> | BENDR <sup>(l)</sup> | CBraMod <sup>(f)</sup> | CBraMod <sup>(l)</sup> | EEGPT <sup>(f)</sup> | EEGPT <sup>(l)</sup> | LaBraM <sup>(f)</sup> | LaBraM <sup>(l)</sup> | STEEGformer-s <sup>(f)</sup> | STEEGformer-s <sup>(l)</sup> | STEEGformer-h <sup>(f)</sup> | STEEGformer-h <sup>(l)</sup> | STEEGformer-l <sup>(f)</sup>   | Unlabeled       |
|-----------------|----------|--------------------------------|-----------------|-----------------|--------------------------------|-----------------|---------------------|---------------------|----------------------|----------------------|------------------------|------------------------|----------------------|----------------------|-----------------------|-----------------------|------------------------------|------------------------------|------------------------------|------------------------------|--------------------------------|-----------------|
| Subject2_async  | Acc.2    | 0.136<br>±0.037                | 0.149<br>±0.030 | 0.130<br>±0.038 | 0.138<br>±0.027                | 0.115<br>±0.055 | 0.089<br>±0.018     | 0.078<br>±0.027     | 0.108<br>±0.027      | 0.085<br>±0.018      | 0.137<br>±0.035        | 0.117<br>±0.016        | 0.095<br>±0.009      | 0.156<br>±0.033      | 0.184<br>±0.044       | 0.058<br>±0.015       | 0.153<br>±0.045              | 0.076<br>±0.018              | 0.237<br>± 0.031             | 0.071<br>±0.025              | <b>0.203</b><br>± <b>0.039</b> | 0.257<br>±0.013 |
|                 | $\kappa$ | 0.076<br>±0.030                | 0.089<br>±0.025 | 0.103<br>±0.025 | 0.148<br>±0.080                | 0.049<br>±0.040 | 0.146<br>±0.028     | 0.102<br>±0.043     | 0.053<br>±0.015      | 0.023<br>±0.013      | 0.031<br>±0.017        | 0.032<br>±0.025        | 0.024<br>±0.009      | 0.069<br>±0.018      | 0.168<br>±0.042       | 0.012<br>±0.012       | 0.126<br>±0.038              | 0.012<br>±0.012              | 0.297<br>± 0.047             | 0.022<br>±0.020              | <b>0.225</b><br>± <b>0.020</b> | 0.256<br>±0.008 |
|                 | AUC      | 0.760<br>±0.016                | 0.738<br>±0.020 | 0.758<br>±0.017 | <b>0.811</b><br>± <b>0.030</b> | 0.656<br>±0.092 | 0.701<br>±0.018     | 0.745<br>±0.042     | 0.636<br>±0.021      | 0.600<br>±0.020      | 0.621<br>±0.048        | 0.644<br>±0.055        | 0.573<br>±0.013      | 0.723<br>±0.047      | 0.721<br>±0.014       | 0.525<br>±0.028       | 0.672<br>±0.030              | 0.596<br>±0.037              | 0.829<br>± 0.023             | 0.597<br>±0.041              | 0.784<br>±0.023                | 0.766<br>±0.037 |
|                 | BAcc     | 0.100<br>±0.029                | 0.112<br>±0.024 | 0.125<br>±0.025 | 0.170<br>±0.078                | 0.073<br>±0.039 | 0.168<br>±0.027     | 0.124<br>±0.042     | 0.077<br>±0.015      | 0.048<br>±0.013      | 0.055<br>±0.016        | 0.056<br>±0.024        | 0.048<br>±0.009      | 0.092<br>±0.017      | 0.189<br>±0.041       | 0.037<br>±0.012       | 0.148<br>±0.037              | 0.037<br>±0.012              | 0.315<br>± 0.045             | 0.046<br>±0.020              | <b>0.244</b><br>± <b>0.019</b> | 0.251<br>±0.008 |
|                 | Acc.1    | 0.100<br>±0.029                | 0.112<br>±0.024 | 0.125<br>±0.025 | 0.170<br>±0.078                | 0.073<br>±0.039 | 0.167<br>±0.028     | 0.123<br>±0.042     | 0.077<br>±0.016      | 0.048<br>±0.014      | 0.055<br>±0.016        | 0.058<br>±0.024        | 0.048<br>±0.009      | 0.093<br>±0.017      | 0.190<br>±0.042       | 0.037<br>±0.012       | 0.149<br>±0.036              | 0.037<br>±0.012              | 0.313<br>± 0.046             | 0.046<br>±0.020              | <b>0.244</b><br>± <b>0.019</b> | 0.251<br>±0.008 |
|                 | Acc.2    | 0.188<br>±0.030                | 0.187<br>±0.037 | 0.196<br>±0.033 | 0.284<br>±0.095                | 0.128<br>±0.052 | 0.264<br>±0.027     | 0.219<br>±0.035     | 0.135<br>±0.024      | 0.084<br>±0.026      | 0.111<br>±0.025        | 0.113<br>±0.035        | 0.085<br>±0.018      | 0.158<br>±0.034      | 0.284<br>±0.045       | 0.071<br>±0.015       | 0.246<br>±0.044              | 0.076<br>±0.010              | 0.455<br>± 0.038             | 0.087<br>±0.033              | <b>0.393</b><br>± <b>0.022</b> | 0.277<br>±0.015 |
|                 | $\kappa$ | 0.241<br>±0.048                | 0.167<br>±0.052 | 0.130<br>±0.035 | <b>0.253</b><br>± <b>0.041</b> | 0.111<br>±0.069 | 0.145<br>±0.025     | 0.119<br>±0.036     | 0.148<br>±0.026      | 0.042<br>±0.023      | 0.031<br>±0.026        | 0.058<br>±0.021        | 0.070<br>±0.020      | 0.131<br>±0.007      | 0.172<br>±0.014       | -0.001<br>±0.007      | 0.152<br>±0.026              | 0.018<br>±0.016              | 0.285<br>± 0.034             | 0.019<br>±0.017              | 0.245<br>±0.038                | 0.256<br>±0.014 |
|                 | AUC      | <b>0.848</b><br>± <b>0.024</b> | 0.829<br>±0.034 | 0.778<br>±0.028 | 0.860<br>± 0.028               | 0.731<br>±0.132 | 0.707<br>±0.017     | 0.763<br>±0.022     | 0.761<br>±0.020      | 0.682<br>±0.035      | 0.599<br>±0.048        | 0.716<br>±0.040        | 0.675<br>±0.025      | 0.803<br>±0.020      | 0.717<br>±0.011       | 0.530<br>±0.015       | 0.679<br>±0.019              | 0.599<br>±0.054              | 0.832<br>±0.027              | 0.603<br>±0.044              | 0.790<br>±0.025                | 0.632<br>±0.036 |
|                 | BAcc     | 0.260<br>±0.047                | 0.188<br>±0.051 | 0.152<br>±0.034 | <b>0.271</b><br>± <b>0.040</b> | 0.133<br>±0.067 | 0.167<br>±0.025     | 0.141<br>±0.035     | 0.170<br>±0.025      | 0.066<br>±0.022      | 0.055<br>±0.026        | 0.081<br>±0.021        | 0.093<br>±0.019      | 0.152<br>±0.007      | 0.192<br>±0.014       | 0.024<br>±0.007       | 0.173<br>±0.026              | 0.043<br>±0.015              | 0.303<br>± 0.033             | 0.043<br>±0.017              | 0.264<br>±0.037                | 0.040<br>±0.013 |
|                 | Acc.1    | 0.260<br>±0.047                | 0.188<br>±0.051 | 0.152<br>±0.034 | <b>0.271</b><br>± <b>0.040</b> | 0.133<br>±0.067 | 0.167<br>±0.024     | 0.141<br>±0.035     | 0.170<br>±0.026      | 0.066<br>±0.022      | 0.056<br>±0.026        | 0.083<br>±0.019        | 0.093<br>±0.020      | 0.154<br>±0.008      | 0.192<br>±0.010       | 0.024<br>±0.006       | 0.174<br>±0.026              | 0.042<br>±0.015              | 0.304<br>± 0.033             | 0.044<br>±0.018              | 0.269<br>±0.039                | 0.040<br>±0.013 |
|                 | Acc.2    | 0.381<br>±0.048                | 0.305<br>±0.058 | 0.253<br>±0.060 | <b>0.409</b><br>± <b>0.039</b> | 0.210<br>±0.100 | 0.267<br>±0.029     | 0.230<br>±0.040     | 0.279<br>±0.027      | 0.122<br>±0.030      | 0.114<br>±0.037        | 0.151<br>±0.023        | 0.151<br>±0.013      | 0.273<br>±0.016      | 0.287<br>±0.016       | 0.054<br>±0.010       | 0.257<br>±0.020              | 0.083<br>±0.026              | 0.433<br>± 0.044             | 0.080<br>±0.020              | 0.380<br>±0.054                | 0.077<br>±0.015 |
| Subject31_async | $\kappa$ | 0.311<br>±0.037                | 0.234<br>±0.035 | 0.228<br>±0.029 | 0.301<br>±0.036                | 0.103<br>±0.063 | 0.113<br>±0.038     | 0.116<br>±0.035     | 0.200<br>±0.030      | 0.024<br>±0.020      | 0.059<br>±0.030        | 0.002<br>±0.012        | 0.059<br>±0.006      | 0.166<br>±0.039      | 0.197<br>±0.032       | 0.004<br>±0.008       | 0.266<br>±0.046              | 0.014<br>±0.014              | 0.399<br>± 0.082             | 0.026<br>±0.016              | <b>0.388</b><br>± <b>0.074</b> | 0.045<br>±0.033 |
|                 | AUC      | 0.880<br>±0.032                | 0.856<br>±0.033 | 0.827<br>±0.020 | <b>0.880</b><br>± <b>0.027</b> | 0.750<br>±0.140 | 0.663<br>±0.018     | 0.750<br>±0.035     | 0.798<br>±0.019      | 0.674<br>±0.018      | 0.661<br>±0.036        | 0.556<br>±0.051        | 0.653<br>±0.013      | 0.829<br>±0.031      | 0.765<br>±0.027       | 0.526<br>±0.022       | 0.767<br>±0.031              | 0.619<br>±0.068              | 0.880<br>± 0.038             | 0.611<br>±0.048              | 0.859<br>±0.038                | 0.668<br>±0.081 |
|                 | BAcc     | 0.328<br>±0.036                | 0.253<br>±0.034 | 0.247<br>±0.028 | 0.319<br>±0.035                | 0.125<br>±0.062 | 0.135<br>±0.037     | 0.138<br>±0.035     | 0.220<br>±0.029      | 0.048<br>±0.020      | 0.082<br>±0.029        | 0.027<br>±0.012        | 0.082<br>±0.006      | 0.187<br>±0.038      | 0.217<br>±0.031       | 0.029<br>±0.008       | 0.285<br>±0.045              | 0.039<br>±0.013              | 0.414<br>± 0.080             | 0.050<br>±0.016              | <b>0.403</b><br>± <b>0.072</b> | 0.069<br>±0.032 |
|                 | Acc.1    | 0.328<br>±0.036                | 0.253<br>±0.034 | 0.247<br>±0.028 | 0.319<br>±0.035                | 0.125<br>±0.062 | 0.135<br>±0.038     | 0.138<br>±0.034     | 0.220<br>±0.028      | 0.049<br>±0.020      | 0.083<br>±0.029        | 0.029<br>±0.013        | 0.083<br>±0.006      | 0.188<br>±0.036      | 0.218<br>±0.033       | 0.028<br>±0.007       | 0.287<br>±0.042              | 0.039<br>±0.014              | 0.418<br>± 0.078             | 0.050<br>±0.014              | <b>0.406</b><br>± <b>0.068</b> | 0.068<br>±0.031 |
|                 | Acc.2    | 0.328<br>±0.036                | 0.253<br>±0.034 | 0.247<br>±0.028 | 0.319<br>±0.035                | 0.125<br>±0.062 | 0.135<br>±0.038     | 0.138<br>±0.034     | 0.220<br>±0.028      | 0.049<br>±0.020      | 0.083<br>±0.029        | 0.029<br>±0.013        | 0.083<br>±0.006      | 0.188<br>±0.036      | 0.218<br>±0.033       | 0.028<br>±0.007       | 0.287<br>±0.042              | 0.039<br>±0.014              | 0.418<br>± 0.078             | 0.050<br>±0.014              | <b>0.406</b><br>± <b>0.068</b> | 0.068<br>±0.031 |

Continued on next page

| Subject                | Metric          | DeepConvnet     | EEGNet          | Conformer       | CTNet            | SSVEPDNN        | BIOT (f)         | BIOT (l)        | BENDR (f)       | BENDR (l)       | CBraMod (f)     | CBraMod (l)     | EEGPT (f)       | EEGPT (l)       | LaBraM (f)      | LaBraM (l)      | STEEGformer-s (f) | STEEGformer-s (l) | STEEGformer-b (f) | STEEGformer-b (l) | STEEGformer-l (f) | STEEGformer-l (l) | Unlabeled       |
|------------------------|-----------------|-----------------|-----------------|-----------------|------------------|-----------------|------------------|-----------------|-----------------|-----------------|-----------------|-----------------|-----------------|-----------------|-----------------|-----------------|-------------------|-------------------|-------------------|-------------------|-------------------|-------------------|-----------------|
| Subject32_async        | Acc.2           | 0.472<br>±0.047 | 0.380<br>±0.046 | 0.368<br>±0.036 | 0.475<br>±0.041  | 0.213<br>±0.093 | 0.216<br>±0.036  | 0.226<br>±0.034 | 0.334<br>±0.021 | 0.104<br>±0.027 | 0.150<br>±0.047 | 0.074<br>±0.024 | 0.149<br>±0.012 | 0.314<br>±0.065 | 0.338<br>±0.043 | 0.056<br>±0.011 | 0.402<br>±0.056   | 0.092<br>±0.015   | 0.563<br>± 0.079  | 0.098<br>±0.019   | 0.543<br>± 0.072  | 0.39<br>±0.049    |                 |
|                        | κ               | 0.642<br>±0.041 | 0.481<br>±0.027 | 0.500<br>±0.056 | 0.664<br>±0.025  | 0.389<br>±0.218 | 0.647<br>±0.027  | 0.501<br>±0.028 | 0.616<br>±0.033 | 0.042<br>±0.021 | 0.079<br>±0.034 | 0.045<br>±0.016 | 0.197<br>±0.021 | 0.384<br>±0.024 | 0.658<br>±0.015 | 0.014<br>±0.005 | 0.631<br>±0.053   | 0.015<br>±0.019   | 0.735<br>± 0.046  | 0.039<br>±0.021   | 0.778<br>± 0.050  | 0.66<br>±0.029    |                 |
|                        | AUC             | 0.987<br>±0.004 | 0.966<br>±0.013 | 0.971<br>±0.004 | 0.989<br>± 0.001 | 0.872<br>±0.208 | 0.959<br>±0.009  | 0.982<br>±0.005 | 0.976<br>±0.005 | 0.663<br>±0.017 | 0.670<br>±0.033 | 0.621<br>±0.030 | 0.800<br>±0.011 | 0.923<br>±0.006 | 0.966<br>±0.011 | 0.575<br>±0.014 | 0.939<br>±0.018   | 0.627<br>±0.049   | 0.988<br>± 0.004  | 0.676<br>±0.034   | 0.980<br>±0.009   | 0.70<br>±0.016    |                 |
|                        | BAcc            | 0.651<br>±0.040 | 0.494<br>±0.026 | 0.513<br>±0.055 | 0.673<br>±0.024  | 0.404<br>±0.213 | 0.655<br>±0.026  | 0.514<br>±0.028 | 0.625<br>±0.032 | 0.066<br>±0.021 | 0.102<br>±0.033 | 0.069<br>±0.015 | 0.217<br>±0.020 | 0.399<br>±0.023 | 0.666<br>±0.015 | 0.039<br>±0.005 | 0.640<br>±0.052   | 0.040<br>±0.018   | 0.741<br>± 0.045  | 0.063<br>±0.020   | 0.784<br>± 0.049  | 0.69<br>±0.028    |                 |
|                        | Acc.1           | 0.651<br>±0.040 | 0.494<br>±0.026 | 0.513<br>±0.055 | 0.673<br>±0.024  | 0.404<br>±0.213 | 0.655<br>±0.029  | 0.515<br>±0.029 | 0.623<br>±0.033 | 0.066<br>±0.021 | 0.104<br>±0.033 | 0.068<br>±0.014 | 0.217<br>±0.019 | 0.397<br>±0.025 | 0.667<br>±0.015 | 0.040<br>±0.004 | 0.639<br>±0.055   | 0.039<br>±0.018   | 0.742<br>± 0.044  | 0.063<br>±0.020   | 0.784<br>± 0.050  | 0.68<br>±0.027    |                 |
|                        | Acc.2           | 0.845<br>±0.026 | 0.690<br>±0.035 | 0.701<br>±0.049 | 0.875<br>±0.017  | 0.552<br>±0.281 | 0.907<br>± 0.017 | 0.801<br>±0.041 | 0.812<br>±0.026 | 0.106<br>±0.030 | 0.167<br>±0.044 | 0.111<br>±0.020 | 0.328<br>±0.028 | 0.557<br>±0.029 | 0.835<br>±0.032 | 0.078<br>±0.010 | 0.804<br>±0.044   | 0.092<br>±0.025   | 0.903<br>±0.031   | 0.116<br>±0.027   | 0.911<br>± 0.021  | 0.74<br>±0.033    |                 |
| Subject33_async        | κ               | 0.432<br>±0.052 | 0.338<br>±0.033 | 0.271<br>±0.055 | 0.462<br>±0.033  | 0.171<br>±0.096 | 0.307<br>±0.031  | 0.207<br>±0.023 | 0.381<br>±0.041 | 0.034<br>±0.006 | 0.076<br>±0.015 | 0.025<br>±0.010 | 0.059<br>±0.018 | 0.192<br>±0.030 | 0.431<br>±0.053 | 0.006<br>±0.009 | 0.454<br>±0.034   | 0.021<br>±0.008   | 0.655<br>± 0.044  | 0.028<br>±0.017   | 0.604<br>± 0.043  | 0.69<br>±0.009    |                 |
|                        | AUC             | 0.935<br>±0.015 | 0.915<br>±0.020 | 0.886<br>±0.030 | 0.945<br>± 0.015 | 0.775<br>±0.154 | 0.826<br>±0.017  | 0.882<br>±0.018 | 0.905<br>±0.017 | 0.668<br>±0.020 | 0.660<br>±0.043 | 0.675<br>±0.043 | 0.662<br>±0.005 | 0.835<br>±0.011 | 0.895<br>±0.017 | 0.557<br>±0.009 | 0.870<br>±0.029   | 0.670<br>±0.013   | 0.970<br>± 0.006  | 0.665<br>±0.016   | 0.944<br>±0.020   | 0.698<br>±0.009   |                 |
|                        | BAcc            | 0.446<br>±0.051 | 0.354<br>±0.032 | 0.290<br>±0.053 | 0.476<br>±0.032  | 0.192<br>±0.094 | 0.325<br>±0.030  | 0.226<br>±0.023 | 0.396<br>±0.040 | 0.058<br>±0.006 | 0.099<br>±0.015 | 0.050<br>±0.009 | 0.082<br>±0.018 | 0.212<br>±0.029 | 0.445<br>±0.051 | 0.031<br>±0.008 | 0.467<br>±0.033   | 0.045<br>±0.008   | 0.664<br>± 0.043  | 0.052<br>±0.017   | 0.614<br>± 0.042  | 0.063<br>±0.009   |                 |
|                        | Acc.1           | 0.446<br>±0.051 | 0.354<br>±0.032 | 0.290<br>±0.053 | 0.476<br>±0.032  | 0.192<br>±0.094 | 0.323<br>±0.031  | 0.224<br>±0.023 | 0.394<br>±0.039 | 0.059<br>±0.006 | 0.099<br>±0.014 | 0.050<br>±0.009 | 0.083<br>±0.018 | 0.211<br>±0.028 | 0.447<br>±0.050 | 0.031<br>±0.008 | 0.467<br>±0.031   | 0.044<br>±0.008   | 0.663<br>± 0.045  | 0.051<br>±0.016   | 0.613<br>± 0.042  | 0.062<br>±0.009   |                 |
|                        | Acc.2           | 0.619<br>±0.050 | 0.522<br>±0.044 | 0.448<br>±0.070 | 0.642<br>±0.039  | 0.298<br>±0.142 | 0.484<br>±0.035  | 0.400<br>±0.031 | 0.543<br>±0.048 | 0.113<br>±0.003 | 0.178<br>±0.029 | 0.090<br>±0.025 | 0.157<br>±0.026 | 0.340<br>±0.053 | 0.597<br>±0.041 | 0.061<br>±0.004 | 0.610<br>±0.056   | 0.089<br>±0.010   | 0.803<br>± 0.026  | 0.095<br>±0.014   | 0.753<br>± 0.038  | 0.121<br>±0.021   |                 |
|                        | Subject34_async | κ               | 0.324<br>±0.052 | 0.262<br>±0.070 | 0.182<br>±0.030  | 0.344<br>±0.071 | 0.119<br>±0.072  | 0.166<br>±0.044 | 0.119<br>±0.044 | 0.391<br>±0.027 | 0.039<br>±0.014 | 0.048<br>±0.022 | 0.040<br>±0.019 | 0.102<br>±0.027 | 0.261<br>±0.037 | 0.297<br>±0.075 | 0.003<br>±0.010   | 0.345<br>±0.059   | 0.011<br>±0.013   | 0.449<br>± 0.055  | 0.002<br>±0.008   | 0.462<br>± 0.035  | 0.027<br>±0.020 |
| AUC                    |                 | 0.895<br>±0.022 | 0.881<br>±0.021 | 0.809<br>±0.015 | 0.897<br>±0.026  | 0.743<br>±0.140 | 0.720<br>±0.029  | 0.759<br>±0.050 | 0.897<br>±0.024 | 0.657<br>±0.025 | 0.639<br>±0.036 | 0.664<br>±0.026 | 0.695<br>±0.022 | 0.863<br>±0.028 | 0.822<br>±0.025 | 0.508<br>±0.045 | 0.830<br>±0.025   | 0.571<br>±0.024   | 0.912<br>± 0.016  | 0.574<br>±0.022   | 0.899<br>± 0.016  | 0.626<br>±0.036   |                 |
| BAcc                   |                 | 0.341<br>±0.051 | 0.280<br>±0.068 | 0.203<br>±0.030 | 0.360<br>±0.069  | 0.141<br>±0.070 | 0.187<br>±0.043  | 0.141<br>±0.043 | 0.406<br>±0.026 | 0.063<br>±0.013 | 0.072<br>±0.021 | 0.064<br>±0.018 | 0.125<br>±0.026 | 0.280<br>±0.036 | 0.315<br>±0.073 | 0.028<br>±0.010 | 0.361<br>±0.058   | 0.036<br>±0.013   | 0.463<br>± 0.054  | 0.027<br>±0.008   | 0.476<br>± 0.034  | 0.051<br>±0.019   |                 |
| Acc.1                  |                 | 0.341<br>±0.051 | 0.280<br>±0.068 | 0.203<br>±0.030 | 0.360<br>±0.069  | 0.141<br>±0.070 | 0.189<br>±0.046  | 0.140<br>±0.042 | 0.409<br>±0.024 | 0.066<br>±0.014 | 0.074<br>±0.023 | 0.068<br>±0.021 | 0.125<br>±0.024 | 0.281<br>±0.037 | 0.315<br>±0.073 | 0.027<br>±0.010 | 0.361<br>±0.057   | 0.035<br>±0.013   | 0.464<br>± 0.053  | 0.027<br>±0.008   | 0.476<br>± 0.033  | 0.051<br>±0.020   |                 |
| Continued on next page |                 |                 |                 |                 |                  |                 |                  |                 |                 |                 |                 |                 |                 |                 |                 |                 |                   |                   |                   |                   |                   |                   |                 |

Continued on next page

| Subject         | Metric                 | DeepConvnet      | EEGNet          | Conformer       | CTNet            | SSVEPDNN        | BIOT (f)        | BIOT (l)        | BENDR (f)       | BENDR (l)       | CBraMod (f)     | CBraMod (l)     | EEGPT (f)       | EEGPT (l)       | LaBraM (f)      | LaBraM (l)      | STEEGformer-s (f) | STEEGformer-s (l) | STEEGformer-b (f) | STEEGformer-b (l) | STEEGformer-l (f) | STEEGformer-l (l) | Uncertainty |
|-----------------|------------------------|------------------|-----------------|-----------------|------------------|-----------------|-----------------|-----------------|-----------------|-----------------|-----------------|-----------------|-----------------|-----------------|-----------------|-----------------|-------------------|-------------------|-------------------|-------------------|-------------------|-------------------|-------------|
| Subject35_async | Acc.2                  | 0.500<br>±0.053  | 0.424<br>±0.065 | 0.326<br>±0.028 | 0.539<br>±0.073  | 0.229<br>±0.106 | 0.292<br>±0.059 | 0.246<br>±0.055 | 0.552<br>±0.018 | 0.119<br>±0.021 | 0.136<br>±0.031 | 0.114<br>±0.026 | 0.191<br>±0.037 | 0.411<br>±0.049 | 0.463<br>±0.065 | 0.054<br>±0.007 | 0.511<br>±0.045   | 0.064<br>±0.011   | 0.640<br>± 0.056  | 0.059<br>±0.017   | 0.646<br>± 0.038  | 0.511<br>±0.022   |             |
|                 | κ                      | 0.258<br>±0.059  | 0.204<br>±0.033 | 0.212<br>±0.056 | 0.286<br>±0.056  | 0.180<br>±0.103 | 0.217<br>±0.071 | 0.160<br>±0.075 | 0.224<br>±0.042 | 0.032<br>±0.010 | 0.063<br>±0.008 | 0.021<br>±0.016 | 0.063<br>±0.016 | 0.152<br>±0.027 | 0.254<br>±0.068 | 0.007<br>±0.008 | 0.212<br>±0.070   | 0.018<br>±0.023   | 0.355<br>± 0.081  | 0.016<br>±0.017   | 0.325<br>± 0.070  | 0.259<br>±0.016   |             |
|                 | AUC                    | 0.876<br>±0.039  | 0.857<br>±0.021 | 0.840<br>±0.032 | 0.900<br>± 0.025 | 0.780<br>±0.158 | 0.762<br>±0.057 | 0.836<br>±0.040 | 0.829<br>±0.024 | 0.687<br>±0.013 | 0.676<br>±0.033 | 0.657<br>±0.029 | 0.638<br>±0.028 | 0.821<br>±0.029 | 0.786<br>±0.047 | 0.544<br>±0.019 | 0.741<br>±0.050   | 0.581<br>±0.048   | 0.885<br>± 0.037  | 0.605<br>±0.028   | 0.838<br>±0.046   | 0.799<br>±0.045   |             |
|                 | BAcc                   | 0.276<br>±0.057  | 0.224<br>±0.032 | 0.231<br>±0.054 | 0.304<br>±0.055  | 0.201<br>±0.100 | 0.236<br>±0.069 | 0.181<br>±0.073 | 0.244<br>±0.040 | 0.056<br>±0.010 | 0.087<br>±0.008 | 0.045<br>±0.015 | 0.087<br>±0.016 | 0.173<br>±0.026 | 0.272<br>±0.066 | 0.032<br>±0.008 | 0.231<br>±0.068   | 0.042<br>±0.023   | 0.371<br>± 0.079  | 0.040<br>±0.016   | 0.342<br>± 0.069  | 0.263<br>±0.015   |             |
|                 | Acc.1                  | 0.276<br>±0.057  | 0.224<br>±0.032 | 0.231<br>±0.054 | 0.304<br>±0.055  | 0.201<br>±0.100 | 0.236<br>±0.070 | 0.179<br>±0.072 | 0.245<br>±0.040 | 0.057<br>±0.011 | 0.087<br>±0.008 | 0.046<br>±0.015 | 0.086<br>±0.016 | 0.174<br>±0.026 | 0.273<br>±0.064 | 0.032<br>±0.008 | 0.232<br>±0.069   | 0.043<br>±0.023   | 0.371<br>± 0.079  | 0.040<br>±0.016   | 0.343<br>± 0.068  | 0.264<br>±0.015   |             |
|                 | Acc.2                  | 0.410<br>±0.082  | 0.351<br>±0.050 | 0.343<br>±0.058 | 0.463<br>±0.069  | 0.312<br>±0.148 | 0.364<br>±0.090 | 0.335<br>±0.079 | 0.372<br>±0.053 | 0.111<br>±0.022 | 0.159<br>±0.017 | 0.092<br>±0.025 | 0.139<br>±0.024 | 0.299<br>±0.038 | 0.403<br>±0.088 | 0.069<br>±0.012 | 0.336<br>±0.077   | 0.085<br>±0.032   | 0.522<br>± 0.092  | 0.083<br>±0.028   | 0.484<br>± 0.085  | 0.211<br>±0.032   |             |
|                 | κ                      | 0.639<br>±0.107  | 0.553<br>±0.050 | 0.497<br>±0.089 | 0.665<br>±0.038  | 0.367<br>±0.211 | 0.667<br>±0.109 | 0.524<br>±0.093 | 0.659<br>±0.062 | 0.055<br>±0.026 | 0.092<br>±0.039 | 0.074<br>±0.029 | 0.371<br>±0.070 | 0.416<br>±0.037 | 0.699<br>±0.065 | 0.008<br>±0.005 | 0.686<br>±0.063   | 0.022<br>±0.025   | 0.704<br>± 0.084  | 0.021<br>±0.019   | 0.731<br>± 0.045  | 0.258<br>±0.024   |             |
|                 | AUC                    | 0.987<br>± 0.010 | 0.978<br>±0.008 | 0.969<br>±0.017 | 0.989<br>± 0.005 | 0.866<br>±0.205 | 0.957<br>±0.032 | 0.978<br>±0.011 | 0.980<br>±0.010 | 0.704<br>±0.016 | 0.663<br>±0.044 | 0.717<br>±0.029 | 0.883<br>±0.028 | 0.959<br>±0.012 | 0.967<br>±0.020 | 0.560<br>±0.032 | 0.955<br>±0.024   | 0.625<br>±0.041   | 0.979<br>±0.014   | 0.662<br>±0.030   | 0.976<br>±0.015   | 0.733<br>±0.037   |             |
| Subject3_async  | BAcc                   | 0.648<br>±0.104  | 0.565<br>±0.049 | 0.510<br>±0.087 | 0.674<br>±0.037  | 0.383<br>±0.206 | 0.675<br>±0.106 | 0.535<br>±0.091 | 0.668<br>±0.061 | 0.078<br>±0.026 | 0.115<br>±0.038 | 0.097<br>±0.028 | 0.386<br>±0.069 | 0.431<br>±0.036 | 0.706<br>±0.064 | 0.033<br>±0.004 | 0.694<br>±0.062   | 0.046<br>±0.025   | 0.712<br>± 0.082  | 0.045<br>±0.018   | 0.738<br>± 0.044  | 0.081<br>±0.023   |             |
|                 | Acc.1                  | 0.648<br>±0.104  | 0.565<br>±0.049 | 0.510<br>±0.087 | 0.674<br>±0.037  | 0.383<br>±0.206 | 0.673<br>±0.107 | 0.536<br>±0.094 | 0.669<br>±0.060 | 0.079<br>±0.025 | 0.116<br>±0.036 | 0.099<br>±0.028 | 0.387<br>±0.069 | 0.432<br>±0.036 | 0.707<br>±0.065 | 0.033<br>±0.005 | 0.693<br>±0.061   | 0.046<br>±0.025   | 0.711<br>± 0.079  | 0.045<br>±0.020   | 0.738<br>± 0.044  | 0.082<br>±0.024   |             |
|                 | Acc.2                  | 0.840<br>±0.080  | 0.763<br>±0.060 | 0.706<br>±0.070 | 0.872<br>± 0.037 | 0.541<br>±0.285 | 0.841<br>±0.085 | 0.792<br>±0.085 | 0.848<br>±0.051 | 0.146<br>±0.028 | 0.192<br>±0.036 | 0.168<br>±0.037 | 0.521<br>±0.074 | 0.619<br>±0.052 | 0.854<br>±0.066 | 0.063<br>±0.010 | 0.840<br>±0.087   | 0.094<br>±0.022   | 0.854<br>±0.061   | 0.109<br>±0.031   | 0.875<br>± 0.064  | 0.155<br>±0.039   |             |
|                 | κ                      | 0.197<br>±0.022  | 0.186<br>±0.030 | 0.147<br>±0.044 | 0.254<br>±0.046  | 0.114<br>±0.070 | 0.226<br>±0.067 | 0.172<br>±0.049 | 0.142<br>±0.046 | 0.022<br>±0.009 | 0.030<br>±0.018 | 0.035<br>±0.013 | 0.056<br>±0.018 | 0.131<br>±0.021 | 0.241<br>±0.020 | 0.009<br>±0.006 | 0.214<br>±0.046   | 0.007<br>±0.013   | 0.333<br>± 0.065  | -0.001<br>±0.021  | 0.304<br>± 0.040  | 0.015<br>±0.017   |             |
|                 | AUC                    | 0.818<br>±0.024  | 0.793<br>±0.032 | 0.782<br>±0.032 | 0.841<br>± 0.021 | 0.711<br>±0.121 | 0.750<br>±0.043 | 0.824<br>±0.032 | 0.739<br>±0.030 | 0.616<br>±0.012 | 0.571<br>±0.031 | 0.658<br>±0.026 | 0.627<br>±0.018 | 0.757<br>±0.042 | 0.771<br>±0.029 | 0.532<br>±0.018 | 0.723<br>±0.039   | 0.563<br>±0.027   | 0.846<br>± 0.031  | 0.552<br>±0.031   | 0.814<br>±0.023   | 0.614<br>±0.012   |             |
|                 | BAcc                   | 0.217<br>±0.022  | 0.207<br>±0.029 | 0.169<br>±0.043 | 0.272<br>±0.045  | 0.136<br>±0.068 | 0.245<br>±0.065 | 0.192<br>±0.048 | 0.163<br>±0.045 | 0.046<br>±0.008 | 0.054<br>±0.018 | 0.060<br>±0.013 | 0.080<br>±0.017 | 0.152<br>±0.020 | 0.260<br>±0.019 | 0.034<br>±0.006 | 0.233<br>±0.045   | 0.032<br>±0.013   | 0.350<br>± 0.063  | 0.024<br>±0.020   | 0.322<br>± 0.039  | 0.040<br>±0.017   |             |
|                 | Acc.1                  | 0.217<br>±0.022  | 0.207<br>±0.029 | 0.169<br>±0.043 | 0.272<br>±0.045  | 0.136<br>±0.068 | 0.244<br>±0.064 | 0.191<br>±0.049 | 0.165<br>±0.045 | 0.047<br>±0.008 | 0.056<br>±0.021 | 0.061<br>±0.013 | 0.079<br>±0.017 | 0.154<br>±0.022 | 0.263<br>±0.019 | 0.033<br>±0.006 | 0.236<br>±0.047   | 0.032<br>±0.013   | 0.350<br>± 0.065  | 0.023<br>±0.020   | 0.325<br>± 0.040  | 0.039<br>±0.016   |             |
|                 | Continued on next page |                  |                 |                 |                  |                 |                 |                 |                 |                 |                 |                 |                 |                 |                 |                 |                   |                   |                   |                   |                   |                   |             |

Continued on next page

| Subject        | Metric         | DeepConvnet      | EEGNet           | Conformer       | CTNet            | SSVEPDNN         | BIOT (f)         | BIOT (l)        | BENDR (f)       | BENDR (l)       | CBraMod (f)     | CBraMod (l)     | EEGPT (f)       | EEGPT (l)       | LaBraM (f)      | LaBraM (l)      | STEEGformer-s (f) | STEEGformer-s (l) | STEEGformer-b (f) | STEEGformer-b (l) | STEEGformer-l (f) | STEEGformer-l (l) | Univariate      |
|----------------|----------------|------------------|------------------|-----------------|------------------|------------------|------------------|-----------------|-----------------|-----------------|-----------------|-----------------|-----------------|-----------------|-----------------|-----------------|-------------------|-------------------|-------------------|-------------------|-------------------|-------------------|-----------------|
| Subject5_async | Acc.2          | 0.345<br>±0.033  | 0.325<br>±0.047  | 0.278<br>±0.056 | 0.421<br>±0.042  | 0.230<br>±0.114  | 0.367<br>±0.083  | 0.360<br>±0.051 | 0.265<br>±0.046 | 0.092<br>±0.012 | 0.108<br>±0.024 | 0.108<br>±0.021 | 0.141<br>±0.022 | 0.248<br>±0.042 | 0.372<br>±0.025 | 0.059<br>±0.006 | 0.355<br>±0.074   | 0.064<br>±0.016   | 0.507<br>± 0.068  | 0.055<br>±0.022   | 0.464<br>± 0.058  | 0.053<br>±0.020   |                 |
|                | κ              | 0.717<br>±0.032  | 0.622<br>±0.022  | 0.541<br>±0.027 | 0.747<br>±0.017  | 0.418<br>±0.237  | 0.750<br>± 0.049 | 0.546<br>±0.036 | 0.705<br>±0.036 | 0.062<br>±0.023 | 0.116<br>±0.060 | 0.070<br>±0.027 | 0.421<br>±0.032 | 0.469<br>±0.040 | 0.737<br>±0.036 | 0.019<br>±0.007 | 0.712<br>±0.047   | 0.047<br>±0.011   | 0.719<br>±0.059   | 0.048<br>±0.015   | 0.773<br>± 0.039  | 0.054<br>±0.025   |                 |
|                | AUC            | 0.992<br>± 0.002 | 0.985<br>±0.003  | 0.975<br>±0.004 | 0.993<br>± 0.002 | 0.875<br>±0.209  | 0.978<br>±0.009  | 0.986<br>±0.004 | 0.984<br>±0.005 | 0.742<br>±0.023 | 0.730<br>±0.031 | 0.725<br>±0.029 | 0.913<br>±0.016 | 0.972<br>±0.005 | 0.976<br>±0.007 | 0.563<br>±0.023 | 0.965<br>±0.016   | 0.639<br>±0.027   | 0.986<br>±0.005   | 0.659<br>±0.026   | 0.983<br>±0.006   | 0.054<br>±0.029   |                 |
|                | BAcc           | 0.725<br>±0.032  | 0.631<br>±0.021  | 0.553<br>±0.026 | 0.753<br>±0.017  | 0.433<br>±0.231  | 0.756<br>± 0.048 | 0.558<br>±0.035 | 0.712<br>±0.036 | 0.085<br>±0.022 | 0.138<br>±0.058 | 0.093<br>±0.026 | 0.435<br>±0.031 | 0.482<br>±0.039 | 0.744<br>±0.035 | 0.043<br>±0.007 | 0.719<br>±0.046   | 0.070<br>±0.010   | 0.726<br>±0.057   | 0.071<br>±0.015   | 0.779<br>± 0.038  | 0.057<br>±0.024   |                 |
|                | Acc.1          | 0.725<br>±0.032  | 0.631<br>±0.021  | 0.553<br>±0.026 | 0.753<br>±0.017  | 0.433<br>±0.231  | 0.755<br>± 0.048 | 0.556<br>±0.038 | 0.713<br>±0.037 | 0.087<br>±0.023 | 0.137<br>±0.058 | 0.096<br>±0.026 | 0.435<br>±0.032 | 0.483<br>±0.040 | 0.745<br>±0.035 | 0.042<br>±0.008 | 0.718<br>±0.046   | 0.070<br>±0.012   | 0.725<br>±0.057   | 0.072<br>±0.015   | 0.780<br>± 0.040  | 0.058<br>±0.026   |                 |
|                | Acc.2          | 0.905<br>±0.029  | 0.838<br>±0.018  | 0.744<br>±0.022 | 0.938<br>± 0.016 | 0.576<br>±0.296  | 0.912<br>±0.024  | 0.846<br>±0.034 | 0.878<br>±0.023 | 0.148<br>±0.037 | 0.233<br>±0.081 | 0.163<br>±0.048 | 0.578<br>±0.031 | 0.681<br>±0.047 | 0.916<br>±0.025 | 0.072<br>±0.011 | 0.862<br>±0.037   | 0.121<br>±0.017   | 0.888<br>±0.041   | 0.122<br>±0.026   | 0.923<br>± 0.025  | 0.055<br>±0.029   |                 |
|                | Subject6_async | κ                | 0.593<br>±0.032  | 0.471<br>±0.037 | 0.396<br>±0.058  | 0.610<br>±0.041  | 0.256<br>±0.143  | 0.386<br>±0.041 | 0.328<br>±0.041 | 0.495<br>±0.052 | 0.034<br>±0.020 | 0.087<br>±0.027 | 0.057<br>±0.025 | 0.195<br>±0.018 | 0.357<br>±0.033 | 0.584<br>±0.039 | 0.017<br>±0.015   | 0.598<br>±0.025   | 0.009<br>±0.009   | 0.701<br>± 0.026  | 0.033<br>±0.013   | 0.736<br>± 0.037  | 0.058<br>±0.014 |
| AUC            |                | 0.981<br>± 0.003 | 0.962<br>±0.010  | 0.944<br>±0.006 | 0.981<br>± 0.003 | 0.824<br>±0.181  | 0.875<br>±0.020  | 0.944<br>±0.011 | 0.944<br>±0.008 | 0.652<br>±0.021 | 0.692<br>±0.020 | 0.706<br>±0.034 | 0.786<br>±0.018 | 0.929<br>±0.009 | 0.947<br>±0.015 | 0.545<br>±0.003 | 0.939<br>±0.008   | 0.666<br>±0.027   | 0.976<br>±0.007   | 0.653<br>±0.034   | 0.974<br>±0.007   | 0.729<br>±0.019   |                 |
| BAcc           |                | 0.604<br>±0.031  | 0.485<br>±0.036  | 0.411<br>±0.057 | 0.620<br>±0.040  | 0.275<br>±0.140  | 0.401<br>±0.040  | 0.345<br>±0.040 | 0.508<br>±0.051 | 0.059<br>±0.019 | 0.110<br>±0.027 | 0.081<br>±0.024 | 0.215<br>±0.018 | 0.373<br>±0.032 | 0.595<br>±0.038 | 0.041<br>±0.015 | 0.608<br>±0.025   | 0.034<br>±0.009   | 0.708<br>± 0.025  | 0.057<br>±0.013   | 0.742<br>± 0.036  | 0.072<br>±0.014   |                 |
| Acc.1          |                | 0.604<br>±0.031  | 0.485<br>±0.036  | 0.411<br>±0.057 | 0.620<br>±0.040  | 0.275<br>±0.140  | 0.397<br>±0.039  | 0.343<br>±0.040 | 0.506<br>±0.051 | 0.059<br>±0.019 | 0.110<br>±0.026 | 0.081<br>±0.025 | 0.214<br>±0.016 | 0.371<br>±0.034 | 0.592<br>±0.043 | 0.041<br>±0.015 | 0.604<br>±0.026   | 0.033<br>±0.009   | 0.703<br>± 0.025  | 0.057<br>±0.015   | 0.739<br>± 0.036  | 0.070<br>±0.013   |                 |
| Acc.2          |                | 0.792<br>±0.013  | 0.684<br>±0.059  | 0.591<br>±0.047 | 0.826<br>±0.033  | 0.408<br>±0.202  | 0.593<br>±0.039  | 0.581<br>±0.042 | 0.675<br>±0.038 | 0.108<br>±0.023 | 0.196<br>±0.029 | 0.146<br>±0.024 | 0.320<br>±0.026 | 0.538<br>±0.033 | 0.767<br>±0.046 | 0.071<br>±0.018 | 0.778<br>±0.028   | 0.073<br>±0.013   | 0.844<br>± 0.027  | 0.107<br>±0.016   | 0.883<br>± 0.019  | 0.110<br>±0.021   |                 |
| Subject7_async |                | κ                | 0.469<br>±0.089  | 0.329<br>±0.054 | 0.391<br>±0.056  | 0.499<br>±0.060  | 0.192<br>±0.109  | 0.293<br>±0.023 | 0.300<br>±0.064 | 0.323<br>±0.031 | 0.038<br>±0.008 | 0.066<br>±0.033 | 0.047<br>±0.020 | 0.084<br>±0.020 | 0.224<br>±0.057 | 0.372<br>±0.077 | 0.021<br>±0.010   | 0.404<br>±0.091   | 0.017<br>±0.004   | 0.518<br>± 0.046  | 0.015<br>±0.020   | 0.524<br>± 0.072  | 0.028<br>±0.011 |
|                |                | AUC              | 0.952<br>± 0.021 | 0.914<br>±0.019 | 0.928<br>±0.025  | 0.956<br>± 0.019 | 0.791<br>±0.165  | 0.827<br>±0.021 | 0.911<br>±0.019 | 0.874<br>±0.019 | 0.655<br>±0.016 | 0.680<br>±0.045 | 0.661<br>±0.015 | 0.681<br>±0.028 | 0.872<br>±0.030 | 0.857<br>±0.049 | 0.582<br>±0.015   | 0.838<br>±0.034   | 0.654<br>±0.023   | 0.939<br>±0.009   | 0.620<br>±0.019   | 0.921<br>±0.027   | 0.703<br>±0.033 |
|                | BAcc           | 0.482<br>±0.086  | 0.346<br>±0.052  | 0.406<br>±0.055 | 0.512<br>±0.058  | 0.212<br>±0.106  | 0.310<br>±0.023  | 0.317<br>±0.062 | 0.340<br>±0.031 | 0.062<br>±0.008 | 0.089<br>±0.032 | 0.071<br>±0.020 | 0.107<br>±0.020 | 0.244<br>±0.056 | 0.387<br>±0.075 | 0.045<br>±0.010 | 0.419<br>±0.088   | 0.041<br>±0.004   | 0.530<br>± 0.045  | 0.040<br>±0.020   | 0.536<br>± 0.070  | 0.053<br>±0.011   |                 |
|                | Acc.1          | 0.482<br>±0.086  | 0.346<br>±0.052  | 0.406<br>±0.055 | 0.512<br>±0.058  | 0.212<br>±0.106  | 0.314<br>±0.019  | 0.320<br>±0.062 | 0.340<br>±0.031 | 0.062<br>±0.008 | 0.088<br>±0.031 | 0.072<br>±0.021 | 0.107<br>±0.020 | 0.242<br>±0.055 | 0.388<br>±0.072 | 0.045<br>±0.010 | 0.421<br>±0.088   | 0.042<br>±0.006   | 0.533<br>± 0.044  | 0.040<br>±0.020   | 0.538<br>± 0.067  | 0.052<br>±0.010   |                 |

Continued on next page

6000  
6001  
6002  
6003  
6004  
6005  
6006  
6007  
6008  
6009  
6010  
6011  
6012  
6013  
6014  
6015  
6016  
6017  
6018  
6019  
6020  
6021  
6022  
6023  
6024  
6025  
6026  
6027  
6028  
6029  
6030  
6031  
6032

| Subject        | Metric | DeepConvnet                    | EEGNet          | Conformer       | CTNet                          | SSVEPDNN        | BIOT (f)        | BIOT (l)        | BENDR (f)       | BENDR (l)       | CBraMod (f)     | CBraMod (l)     | EEGPT (f)       | EEGPT (l)       | LaBraM (f)      | LaBraM (l)      | STEEGformer-s (f) | STEEGformer-s (l) | STEEGformer-b (f)              | STEEGformer-b (l) | STEEGformer-l (f)              | STEEGformer-l (l) | Univariate |
|----------------|--------|--------------------------------|-----------------|-----------------|--------------------------------|-----------------|-----------------|-----------------|-----------------|-----------------|-----------------|-----------------|-----------------|-----------------|-----------------|-----------------|-------------------|-------------------|--------------------------------|-------------------|--------------------------------|-------------------|------------|
| Subject8_async | Acc.2  | 0.660<br>±0.100                | 0.510<br>±0.045 | 0.565<br>±0.073 | <b>0.710</b><br>± <b>0.077</b> | 0.335<br>±0.163 | 0.492<br>±0.053 | 0.511<br>±0.061 | 0.481<br>±0.028 | 0.113<br>±0.015 | 0.167<br>±0.042 | 0.133<br>±0.016 | 0.165<br>±0.023 | 0.390<br>±0.057 | 0.533<br>±0.092 | 0.080<br>±0.017 | 0.562<br>±0.076   | 0.088<br>±0.022   | 0.710<br>± 0.046               | 0.070<br>±0.018   | 0.704<br>±0.063                | 0.596<br>±0.017   |            |
|                | κ      | 0.422<br>±0.068                | 0.359<br>±0.061 | 0.282<br>±0.029 | 0.440<br>±0.065                | 0.179<br>±0.104 | 0.326<br>±0.024 | 0.291<br>±0.010 | 0.396<br>±0.060 | 0.035<br>±0.020 | 0.034<br>±0.019 | 0.038<br>±0.032 | 0.158<br>±0.035 | 0.292<br>±0.036 | 0.399<br>±0.046 | 0.008<br>±0.006 | 0.396<br>±0.017   | 0.015<br>±0.030   | <b>0.462</b><br>± <b>0.058</b> | 0.019<br>±0.012   | 0.470<br>± 0.041               | 0.581<br>±0.030   |            |
|                | AUC    | <b>0.947</b><br>± <b>0.022</b> | 0.928<br>±0.025 | 0.899<br>±0.025 | 0.954<br>± 0.016               | 0.784<br>±0.161 | 0.822<br>±0.017 | 0.914<br>±0.015 | 0.910<br>±0.016 | 0.655<br>±0.043 | 0.638<br>±0.036 | 0.653<br>±0.061 | 0.749<br>±0.024 | 0.894<br>±0.026 | 0.872<br>±0.030 | 0.557<br>±0.025 | 0.840<br>±0.007   | 0.615<br>±0.030   | 0.933<br>±0.021                | 0.602<br>±0.022   | 0.900<br>±0.011                | 0.909<br>±0.032   |            |
|                | BAcc   | 0.436<br>±0.066                | 0.375<br>±0.060 | 0.300<br>±0.029 | 0.454<br>±0.063                | 0.200<br>±0.102 | 0.343<br>±0.024 | 0.309<br>±0.010 | 0.411<br>±0.059 | 0.060<br>±0.020 | 0.059<br>±0.018 | 0.062<br>±0.031 | 0.179<br>±0.034 | 0.310<br>±0.035 | 0.414<br>±0.045 | 0.033<br>±0.005 | 0.411<br>±0.017   | 0.040<br>±0.029   | <b>0.475</b><br>± <b>0.057</b> | 0.044<br>±0.011   | 0.483<br>± 0.040               | 0.555<br>±0.029   |            |
|                | Acc.1  | 0.436<br>±0.066                | 0.375<br>±0.060 | 0.300<br>±0.029 | 0.454<br>±0.063                | 0.200<br>±0.102 | 0.341<br>±0.023 | 0.306<br>±0.009 | 0.411<br>±0.057 | 0.060<br>±0.020 | 0.059<br>±0.020 | 0.065<br>±0.031 | 0.180<br>±0.036 | 0.313<br>±0.037 | 0.415<br>±0.046 | 0.033<br>±0.005 | 0.411<br>±0.016   | 0.039<br>±0.029   | <b>0.478</b><br>± <b>0.060</b> | 0.044<br>±0.010   | 0.486<br>± 0.039               | 0.555<br>±0.030   |            |
|                | Acc.2  | 0.629<br>±0.077                | 0.549<br>±0.064 | 0.464<br>±0.055 | 0.662<br>± 0.055               | 0.311<br>±0.150 | 0.505<br>±0.027 | 0.519<br>±0.020 | 0.586<br>±0.043 | 0.110<br>±0.028 | 0.116<br>±0.043 | 0.113<br>±0.037 | 0.281<br>±0.027 | 0.463<br>±0.047 | 0.585<br>±0.047 | 0.070<br>±0.010 | 0.558<br>±0.009   | 0.063<br>±0.039   | 0.647<br>±0.062                | 0.080<br>±0.005   | <b>0.649</b><br>± <b>0.058</b> | 0.596<br>±0.034   |            |
| Subject9_async | κ      | 0.412<br>±0.034                | 0.349<br>±0.032 | 0.326<br>±0.044 | 0.460<br>±0.041                | 0.249<br>±0.141 | 0.325<br>±0.035 | 0.262<br>±0.033 | 0.385<br>±0.030 | 0.046<br>±0.009 | 0.097<br>±0.035 | 0.007<br>±0.019 | 0.082<br>±0.026 | 0.237<br>±0.026 | 0.350<br>±0.027 | 0.006<br>±0.009 | 0.381<br>±0.054   | 0.015<br>±0.009   | 0.553<br>± 0.038               | 0.009<br>±0.003   | <b>0.535</b><br>± <b>0.041</b> | 0.580<br>±0.012   |            |
|                | AUC    | 0.944<br>±0.003                | 0.922<br>±0.024 | 0.906<br>±0.008 | <b>0.952</b><br>± <b>0.008</b> | 0.814<br>±0.176 | 0.826<br>±0.018 | 0.908<br>±0.010 | 0.901<br>±0.019 | 0.692<br>±0.013 | 0.706<br>±0.025 | 0.587<br>±0.038 | 0.670<br>±0.014 | 0.866<br>±0.015 | 0.853<br>±0.020 | 0.537<br>±0.017 | 0.837<br>±0.024   | 0.602<br>±0.024   | 0.954<br>± 0.005               | 0.575<br>±0.021   | 0.934<br>±0.019                | 0.659<br>±0.017   |            |
|                | BAcc   | 0.427<br>±0.033                | 0.365<br>±0.031 | 0.343<br>±0.043 | 0.474<br>±0.040                | 0.268<br>±0.138 | 0.342<br>±0.034 | 0.280<br>±0.032 | 0.400<br>±0.030 | 0.070<br>±0.008 | 0.120<br>±0.034 | 0.032<br>±0.019 | 0.105<br>±0.025 | 0.256<br>±0.025 | 0.366<br>±0.027 | 0.031<br>±0.009 | 0.397<br>±0.053   | 0.040<br>±0.008   | 0.565<br>± 0.037               | 0.034<br>±0.003   | <b>0.546</b><br>± <b>0.040</b> | 0.055<br>±0.012   |            |
|                | Acc.1  | 0.427<br>±0.033                | 0.365<br>±0.031 | 0.343<br>±0.043 | 0.474<br>±0.040                | 0.268<br>±0.138 | 0.341<br>±0.032 | 0.281<br>±0.031 | 0.401<br>±0.030 | 0.069<br>±0.009 | 0.120<br>±0.035 | 0.034<br>±0.021 | 0.105<br>±0.026 | 0.255<br>±0.024 | 0.367<br>±0.027 | 0.031<br>±0.009 | 0.396<br>±0.052   | 0.039<br>±0.008   | 0.565<br>± 0.037               | 0.034<br>±0.003   | <b>0.547</b><br>± <b>0.043</b> | 0.054<br>±0.012   |            |
|                | Acc.2  | 0.608<br>±0.041                | 0.521<br>±0.075 | 0.504<br>±0.031 | 0.659<br>±0.041                | 0.389<br>±0.191 | 0.502<br>±0.038 | 0.483<br>±0.038 | 0.546<br>±0.039 | 0.128<br>±0.020 | 0.206<br>±0.033 | 0.073<br>±0.021 | 0.173<br>±0.022 | 0.390<br>±0.035 | 0.507<br>±0.038 | 0.062<br>±0.007 | 0.534<br>±0.049   | 0.076<br>±0.015   | 0.737<br>± 0.028               | 0.068<br>±0.020   | <b>0.697</b><br>± <b>0.048</b> | 0.098<br>±0.024   |            |

6033  
6034  
6035  
6036  
6037  
6038  
6039  
6040  
6041  
6042  
6043  
6044  
6045  
6046  
6047  
6048  
6049  
6050  
6051  
6052  
6053  
6054  
6055  
6056  
6057  
6058  
6059  
6060  
6061  
6062  
6063  
6064  
6065

## F.2 PER-SUBJECT RESULTS

## F.2.1 SYNCHRONOUS DECODING RESULTS

## Within-Subject Evaluation

Table 55: Average “Self” Performance Across All Subjects

| Model (Training strategy) | $\kappa$     | AUC          | BAcc         | Acc.1        | Acc.2        |
|---------------------------|--------------|--------------|--------------|--------------|--------------|
|                           | 0.051        | 0.646        | 0.075        | 0.075        | 0.135        |
| <b>DeepConvnet</b>        | $\pm 0.089$  | $\pm 0.098$  | $\pm 0.087$  | $\pm 0.087$  | $\pm 0.114$  |
|                           | 0.019        | 0.589        | 0.043        | 0.043        | 0.085        |
| <b>EEGNet</b>             | $\pm 0.027$  | $\pm 0.062$  | $\pm 0.026$  | $\pm 0.026$  | $\pm 0.042$  |
|                           | 0.041        | 0.611        | 0.065        | 0.065        | 0.112        |
| <b>Conformer</b>          | $\pm 0.044$  | $\pm 0.076$  | $\pm 0.043$  | $\pm 0.043$  | $\pm 0.061$  |
|                           | 0.137        | 0.728        | 0.159        | 0.159        | 0.249        |
| <b>CTNet</b>              | $\pm 0.146$  | $\pm 0.127$  | $\pm 0.142$  | $\pm 0.142$  | $\pm 0.195$  |
|                           | 0.038        | 0.608        | 0.062        | 0.062        | 0.111        |
| <b>SSVEPDNN</b>           | $\pm 0.038$  | $\pm 0.066$  | $\pm 0.037$  | $\pm 0.037$  | $\pm 0.047$  |
|                           | 0.047        | 0.597        | 0.071        | 0.080        | 0.138        |
| <b>BIOT (f)</b>           | $\pm 0.068$  | $\pm 0.085$  | $\pm 0.066$  | $\pm 0.066$  | $\pm 0.093$  |
|                           | 0.029        | 0.577        | 0.053        | 0.055        | 0.098        |
| <b>BIOT (l)</b>           | $\pm 0.039$  | $\pm 0.071$  | $\pm 0.038$  | $\pm 0.041$  | $\pm 0.069$  |
|                           | 0.026        | 0.574        | 0.050        | 0.048        | 0.092        |
| <b>BENDR (f)</b>          | $\pm 0.023$  | $\pm 0.049$  | $\pm 0.022$  | $\pm 0.023$  | $\pm 0.039$  |
|                           | 0.006        | 0.520        | 0.031        | 0.032        | 0.061        |
| <b>BENDR (l)</b>          | $\pm 0.011$  | $\pm 0.021$  | $\pm 0.010$  | $\pm 0.013$  | $\pm 0.018$  |
|                           | 0.038        | 0.601        | 0.062        | 0.066        | 0.115        |
| <b>CBraMod (f)</b>        | $\pm 0.025$  | $\pm 0.041$  | $\pm 0.024$  | $\pm 0.031$  | $\pm 0.040$  |
|                           | 0.022        | 0.602        | 0.047        | 0.054        | 0.102        |
| <b>CBraMod (l)</b>        | $\pm 0.019$  | $\pm 0.053$  | $\pm 0.018$  | $\pm 0.023$  | $\pm 0.041$  |
|                           | 0.022        | 0.557        | 0.047        | 0.047        | 0.081        |
| <b>EEGPT (f)</b>          | $\pm 0.039$  | $\pm 0.062$  | $\pm 0.038$  | $\pm 0.045$  | $\pm 0.065$  |
|                           | <b>0.117</b> | <b>0.718</b> | <b>0.139</b> | <b>0.145</b> | <b>0.228</b> |
| <b>EEGPT (l)</b>          | $\pm 0.117$  | $\pm 0.116$  | $\pm 0.114$  | $\pm 0.123$  | $\pm 0.171$  |
|                           | 0.069        | 0.615        | 0.092        | 0.094        | 0.158        |
| <b>LaBraM (f)</b>         | $\pm 0.092$  | $\pm 0.082$  | $\pm 0.089$  | $\pm 0.090$  | $\pm 0.120$  |
|                           | 0.013        | 0.548        | 0.037        | 0.037        | 0.072        |
| <b>LaBraM (l)</b>         | $\pm 0.018$  | $\pm 0.040$  | $\pm 0.018$  | $\pm 0.020$  | $\pm 0.028$  |
|                           | 0.066        | 0.616        | 0.090        | 0.088        | 0.156        |
| <b>STEEGformer-s (f)</b>  | $\pm 0.057$  | $\pm 0.077$  | $\pm 0.056$  | $\pm 0.059$  | $\pm 0.093$  |
|                           | 0.025        | 0.594        | 0.050        | 0.046        | 0.086        |
| <b>STEEGformer-s (l)</b>  | $\pm 0.023$  | $\pm 0.051$  | $\pm 0.022$  | $\pm 0.028$  | $\pm 0.036$  |

Table 56: Per-Subject ‘‘Self’’ Performance (trained+tested on same subject)

| Subject        | Metric   | DeepConvnet                 | EEGNet                      | Conformer             | CTNet                       | SSVEPDNN             | BIOT (f)             | BIOT (t)                    | BENDR (f)                   | BENDR (t)             | CBraMod (f)                 | CBraMod (t)          | EEGPT (f)                   | EEGPT (t)                   | LaBraM (f)                  | LaBraM (t)                  | STEEGformer-s (f)    | STEEGformer-s (t)           |
|----------------|----------|-----------------------------|-----------------------------|-----------------------|-----------------------------|----------------------|----------------------|-----------------------------|-----------------------------|-----------------------|-----------------------------|----------------------|-----------------------------|-----------------------------|-----------------------------|-----------------------------|----------------------|-----------------------------|
| Subject10_sync | $\kappa$ | 0.005<br>$\pm 0.042$        | -0.005<br>$\pm 0.021$       | 0.010<br>$\pm 0.023$  | 0.056<br>$\pm 0.038$        | 0.010<br>$\pm 0.039$ | 0.021<br>$\pm 0.033$ | 0.026<br>$\pm 0.026$        | 0.031<br>$\pm 0.021$        | -0.005<br>$\pm 0.011$ | 0.015<br>$\pm 0.039$        | 0.026<br>$\pm 0.026$ | <b>0.051</b><br>$\pm 0.060$ | 0.041<br>$\pm 0.029$        | 0.026<br>$\pm 0.031$        | -0.021<br>$\pm 0.011$       | 0.041<br>$\pm 0.043$ | -0.005<br>$\pm 0.011$       |
|                | AUC      | 0.605<br>$\pm 0.023$        | 0.552<br>$\pm 0.043$        | 0.586<br>$\pm 0.044$  | 0.658<br>$\pm 0.022$        | 0.584<br>$\pm 0.029$ | 0.552<br>$\pm 0.045$ | 0.562<br>$\pm 0.044$        | 0.575<br>$\pm 0.054$        | 0.515<br>$\pm 0.025$  | 0.562<br>$\pm 0.037$        | 0.581<br>$\pm 0.035$ | 0.569<br>$\pm 0.046$        | <b>0.621</b><br>$\pm 0.063$ | 0.612<br>$\pm 0.045$        | 0.512<br>$\pm 0.038$        | 0.587<br>$\pm 0.030$ | 0.594<br>$\pm 0.061$        |
|                | BAcc     | 0.030<br>$\pm 0.041$        | 0.020<br>$\pm 0.021$        | 0.035<br>$\pm 0.022$  | 0.080<br>$\pm 0.037$        | 0.035<br>$\pm 0.038$ | 0.045<br>$\pm 0.033$ | 0.050<br>$\pm 0.025$        | 0.055<br>$\pm 0.021$        | 0.020<br>$\pm 0.011$  | 0.040<br>$\pm 0.038$        | 0.050<br>$\pm 0.025$ | <b>0.075</b><br>$\pm 0.059$ | 0.065<br>$\pm 0.029$        | 0.050<br>$\pm 0.031$        | 0.005<br>$\pm 0.011$        | 0.065<br>$\pm 0.042$ | 0.020<br>$\pm 0.011$        |
|                | Acc.1    | 0.030<br>$\pm 0.041$        | 0.020<br>$\pm 0.021$        | 0.035<br>$\pm 0.022$  | <b>0.080</b><br>$\pm 0.037$ | 0.035<br>$\pm 0.038$ | 0.066<br>$\pm 0.055$ | 0.078<br>$\pm 0.062$        | 0.053<br>$\pm 0.026$        | 0.022<br>$\pm 0.024$  | 0.034<br>$\pm 0.034$        | 0.078<br>$\pm 0.031$ | 0.066<br>$\pm 0.036$        | 0.087<br>$\pm 0.063$        | 0.069<br>$\pm 0.051$        | 0.003<br>$\pm 0.007$        | 0.059<br>$\pm 0.045$ | 0.013<br>$\pm 0.007$        |
|                | Acc.2    | 0.075<br>$\pm 0.040$        | 0.065<br>$\pm 0.029$        | 0.115<br>$\pm 0.042$  | <b>0.155</b><br>$\pm 0.069$ | 0.085<br>$\pm 0.063$ | 0.103<br>$\pm 0.109$ | 0.116<br>$\pm 0.056$        | 0.087<br>$\pm 0.059$        | 0.028<br>$\pm 0.020$  | 0.091<br>$\pm 0.049$        | 0.144<br>$\pm 0.047$ | 0.119<br>$\pm 0.063$        | 0.156<br>$\pm 0.091$        | 0.144<br>$\pm 0.049$        | 0.019<br>$\pm 0.007$        | 0.109<br>$\pm 0.051$ | 0.059<br>$\pm 0.036$        |
| Subject11_sync | $\kappa$ | <b>0.015</b><br>$\pm 0.023$ | 0.005<br>$\pm 0.028$        | -0.015<br>$\pm 0.014$ | 0.000<br>$\pm 0.018$        | 0.000<br>$\pm 0.026$ | 0.000<br>$\pm 0.026$ | -0.005<br>$\pm 0.021$       | -0.010<br>$\pm 0.023$       | 0.000<br>$\pm 0.018$  | 0.021<br>$\pm 0.042$        | 0.010<br>$\pm 0.034$ | <b>0.015</b><br>$\pm 0.039$ | 0.021<br>$\pm 0.042$        | <b>0.015</b><br>$\pm 0.039$ | -0.015<br>$\pm 0.014$       | 0.000<br>$\pm 0.031$ | 0.005<br>$\pm 0.011$        |
|                | AUC      | <b>0.552</b><br>$\pm 0.039$ | 0.532<br>$\pm 0.010$        | 0.516<br>$\pm 0.025$  | 0.532<br>$\pm 0.024$        | 0.528<br>$\pm 0.021$ | 0.508<br>$\pm 0.051$ | 0.523<br>$\pm 0.033$        | 0.472<br>$\pm 0.026$        | 0.502<br>$\pm 0.019$  | 0.555<br>$\pm 0.037$        | 0.540<br>$\pm 0.049$ | 0.517<br>$\pm 0.059$        | 0.527<br>$\pm 0.038$        | 0.527<br>$\pm 0.019$        | 0.512<br>$\pm 0.050$        | 0.515<br>$\pm 0.050$ | 0.548<br>$\pm 0.025$        |
|                | BAcc     | <b>0.040</b><br>$\pm 0.022$ | 0.030<br>$\pm 0.027$        | 0.010<br>$\pm 0.014$  | 0.025<br>$\pm 0.018$        | 0.025<br>$\pm 0.025$ | 0.025<br>$\pm 0.025$ | 0.020<br>$\pm 0.021$        | 0.015<br>$\pm 0.022$        | 0.025<br>$\pm 0.018$  | 0.045<br>$\pm 0.041$        | 0.035<br>$\pm 0.034$ | <b>0.040</b><br>$\pm 0.038$ | 0.045<br>$\pm 0.041$        | <b>0.040</b><br>$\pm 0.038$ | 0.010<br>$\pm 0.014$        | 0.025<br>$\pm 0.031$ | 0.030<br>$\pm 0.011$        |
|                | Acc.1    | 0.040<br>$\pm 0.022$        | 0.030<br>$\pm 0.027$        | 0.010<br>$\pm 0.014$  | 0.025<br>$\pm 0.018$        | 0.025<br>$\pm 0.025$ | 0.025<br>$\pm 0.032$ | 0.031<br>$\pm 0.037$        | 0.009<br>$\pm 0.014$        | 0.025<br>$\pm 0.030$  | 0.056<br>$\pm 0.084$        | 0.041<br>$\pm 0.058$ | <b>0.044</b><br>$\pm 0.034$ | 0.037<br>$\pm 0.044$        | <b>0.044</b><br>$\pm 0.064$ | 0.006<br>$\pm 0.009$        | 0.016<br>$\pm 0.019$ | 0.028<br>$\pm 0.020$        |
|                | Acc.2    | 0.055<br>$\pm 0.033$        | 0.060<br>$\pm 0.052$        | 0.030<br>$\pm 0.033$  | 0.035<br>$\pm 0.022$        | 0.070<br>$\pm 0.033$ | 0.066<br>$\pm 0.059$ | 0.047<br>$\pm 0.037$        | 0.028<br>$\pm 0.023$        | 0.044<br>$\pm 0.032$  | 0.078<br>$\pm 0.089$        | 0.119<br>$\pm 0.067$ | 0.066<br>$\pm 0.053$        | 0.062<br>$\pm 0.031$        | 0.059<br>$\pm 0.060$        | 0.022<br>$\pm 0.014$        | 0.031<br>$\pm 0.027$ | <b>0.091</b><br>$\pm 0.028$ |
| Subject12_sync | $\kappa$ | 0.005<br>$\pm 0.021$        | <b>0.015</b><br>$\pm 0.029$ | 0.005<br>$\pm 0.028$  | 0.005<br>$\pm 0.021$        | 0.005<br>$\pm 0.021$ | 0.000<br>$\pm 0.018$ | 0.015<br>$\pm 0.023$        | <b>0.015</b><br>$\pm 0.029$ | 0.000<br>$\pm 0.018$  | 0.026<br>$\pm 0.041$        | 0.005<br>$\pm 0.028$ | 0.015<br>$\pm 0.044$        | 0.005<br>$\pm 0.021$        | -0.005<br>$\pm 0.021$       | 0.000<br>$\pm 0.031$        | 0.005<br>$\pm 0.021$ | 0.015<br>$\pm 0.014$        |
|                | AUC      | 0.535<br>$\pm 0.035$        | 0.524<br>$\pm 0.047$        | 0.511<br>$\pm 0.020$  | 0.538<br>$\pm 0.050$        | 0.560<br>$\pm 0.038$ | 0.506<br>$\pm 0.064$ | 0.529<br>$\pm 0.032$        | 0.535<br>$\pm 0.043$        | 0.506<br>$\pm 0.040$  | <b>0.574</b><br>$\pm 0.016$ | 0.543<br>$\pm 0.038$ | 0.514<br>$\pm 0.055$        | 0.598<br>$\pm 0.030$        | 0.536<br>$\pm 0.014$        | 0.490<br>$\pm 0.049$        | 0.506<br>$\pm 0.046$ | 0.513<br>$\pm 0.048$        |
|                | BAcc     | 0.030<br>$\pm 0.021$        | <b>0.040</b><br>$\pm 0.029$ | 0.030<br>$\pm 0.027$  | 0.030<br>$\pm 0.021$        | 0.030<br>$\pm 0.021$ | 0.025<br>$\pm 0.018$ | <b>0.040</b><br>$\pm 0.022$ | <b>0.040</b><br>$\pm 0.029$ | 0.025<br>$\pm 0.018$  | 0.050<br>$\pm 0.040$        | 0.030<br>$\pm 0.027$ | 0.039<br>$\pm 0.043$        | 0.030<br>$\pm 0.021$        | 0.020<br>$\pm 0.021$        | 0.025<br>$\pm 0.031$        | 0.030<br>$\pm 0.021$ | <b>0.040</b><br>$\pm 0.014$ |
|                | Acc.1    | 0.030<br>$\pm 0.021$        | <b>0.040</b><br>$\pm 0.029$ | 0.030<br>$\pm 0.027$  | 0.030<br>$\pm 0.021$        | 0.030<br>$\pm 0.021$ | 0.016<br>$\pm 0.011$ | 0.034<br>$\pm 0.034$        | 0.025<br>$\pm 0.018$        | 0.025<br>$\pm 0.024$  | 0.041<br>$\pm 0.026$        | 0.019<br>$\pm 0.017$ | 0.038<br>$\pm 0.041$        | 0.019<br>$\pm 0.013$        | 0.022<br>$\pm 0.026$        | 0.025<br>$\pm 0.039$        | 0.028<br>$\pm 0.030$ | 0.025<br>$\pm 0.009$        |
|                | Acc.2    | 0.055<br>$\pm 0.048$        | 0.050<br>$\pm 0.031$        | 0.040<br>$\pm 0.022$  | 0.080<br>$\pm 0.065$        | 0.070<br>$\pm 0.033$ | 0.050<br>$\pm 0.043$ | 0.047<br>$\pm 0.027$        | 0.053<br>$\pm 0.035$        | 0.053<br>$\pm 0.042$  | 0.066<br>$\pm 0.017$        | 0.034<br>$\pm 0.026$ | 0.071<br>$\pm 0.038$        | 0.047<br>$\pm 0.025$        | 0.044<br>$\pm 0.020$        | <b>0.072</b><br>$\pm 0.045$ | 0.062<br>$\pm 0.038$ | 0.056<br>$\pm 0.024$        |

Continued on next page

| Subject        | Metric   | DeepConvnet          | EEGNet               | Conformer            | CTNet                       | SSVEPDNN             | BIOT (f)             | BIOT (l)             | BENDR (f)            | BENDR (l)             | CBraMod (f)                 | CBraMod (l)                 | EEGPT (f)             | EEGPT (l)                   | LaBraM (f)            | LaBraM (l)           | STEEGformer-s (f)    | STEEGformer-s (l)    |
|----------------|----------|----------------------|----------------------|----------------------|-----------------------------|----------------------|----------------------|----------------------|----------------------|-----------------------|-----------------------------|-----------------------------|-----------------------|-----------------------------|-----------------------|----------------------|----------------------|----------------------|
| Subject13_sync | $\kappa$ | 0.021<br>$\pm 0.033$ | 0.000<br>$\pm 0.031$ | 0.062<br>$\pm 0.029$ | <b>0.226</b><br>$\pm 0.095$ | 0.062<br>$\pm 0.029$ | 0.031<br>$\pm 0.033$ | 0.010<br>$\pm 0.023$ | 0.041<br>$\pm 0.014$ | 0.010<br>$\pm 0.034$  | 0.077<br>$\pm 0.031$        | 0.031<br>$\pm 0.033$        | 0.021<br>$\pm 0.033$  | 0.282<br>$\pm 0.036$        | 0.041<br>$\pm 0.047$  | 0.015<br>$\pm 0.023$ | 0.087<br>$\pm 0.039$ | 0.067<br>$\pm 0.039$ |
|                | AUC      | 0.675<br>$\pm 0.028$ | 0.586<br>$\pm 0.025$ | 0.677<br>$\pm 0.044$ | <b>0.861</b><br>$\pm 0.052$ | 0.625<br>$\pm 0.057$ | 0.567<br>$\pm 0.024$ | 0.543<br>$\pm 0.034$ | 0.629<br>$\pm 0.058$ | 0.520<br>$\pm 0.018$  | 0.657<br>$\pm 0.042$        | 0.547<br>$\pm 0.042$        | 0.520<br>$\pm 0.061$  | 0.897<br>$\pm 0.022$        | 0.633<br>$\pm 0.035$  | 0.557<br>$\pm 0.043$ | 0.644<br>$\pm 0.045$ | 0.648<br>$\pm 0.031$ |
|                | BAcc     | 0.045<br>$\pm 0.033$ | 0.025<br>$\pm 0.031$ | 0.085<br>$\pm 0.029$ | <b>0.245</b><br>$\pm 0.093$ | 0.085<br>$\pm 0.029$ | 0.055<br>$\pm 0.033$ | 0.035<br>$\pm 0.022$ | 0.065<br>$\pm 0.014$ | 0.035<br>$\pm 0.034$  | 0.100<br>$\pm 0.031$        | 0.055<br>$\pm 0.033$        | 0.045<br>$\pm 0.033$  | 0.300<br>$\pm 0.035$        | 0.065<br>$\pm 0.045$  | 0.040<br>$\pm 0.022$ | 0.110<br>$\pm 0.038$ | 0.090<br>$\pm 0.038$ |
|                | Acc.1    | 0.045<br>$\pm 0.033$ | 0.025<br>$\pm 0.031$ | 0.085<br>$\pm 0.029$ | <b>0.245</b><br>$\pm 0.093$ | 0.085<br>$\pm 0.029$ | 0.072<br>$\pm 0.065$ | 0.041<br>$\pm 0.036$ | 0.041<br>$\pm 0.009$ | 0.041<br>$\pm 0.044$  | 0.100<br>$\pm 0.051$        | 0.034<br>$\pm 0.020$        | 0.047<br>$\pm 0.044$  | 0.309<br>$\pm 0.051$        | 0.059<br>$\pm 0.053$  | 0.025<br>$\pm 0.014$ | 0.106<br>$\pm 0.043$ | 0.075<br>$\pm 0.043$ |
|                | Acc.2    | 0.115<br>$\pm 0.088$ | 0.090<br>$\pm 0.034$ | 0.145<br>$\pm 0.065$ | <b>0.410</b><br>$\pm 0.140$ | 0.135<br>$\pm 0.042$ | 0.134<br>$\pm 0.084$ | 0.066<br>$\pm 0.056$ | 0.097<br>$\pm 0.051$ | 0.072<br>$\pm 0.065$  | 0.184<br>$\pm 0.037$        | 0.047<br>$\pm 0.011$        | 0.053<br>$\pm 0.046$  | 0.484<br>$\pm 0.027$        | 0.150<br>$\pm 0.074$  | 0.044<br>$\pm 0.026$ | 0.209<br>$\pm 0.087$ | 0.147<br>$\pm 0.067$ |
| Subject14_sync | $\kappa$ | 0.041<br>$\pm 0.039$ | 0.000<br>$\pm 0.018$ | 0.021<br>$\pm 0.033$ | 0.292<br>$\pm 0.039$        | 0.005<br>$\pm 0.042$ | 0.031<br>$\pm 0.038$ | 0.026<br>$\pm 0.026$ | 0.021<br>$\pm 0.033$ | 0.021<br>$\pm 0.028$  | 0.010<br>$\pm 0.029$        | 0.046<br>$\pm 0.046$        | 0.026<br>$\pm 0.018$  | <b>0.256</b><br>$\pm 0.081$ | 0.082<br>$\pm 0.028$  | 0.015<br>$\pm 0.014$ | 0.154<br>$\pm 0.077$ | 0.046<br>$\pm 0.021$ |
|                | AUC      | 0.675<br>$\pm 0.033$ | 0.587<br>$\pm 0.033$ | 0.605<br>$\pm 0.044$ | <b>0.877</b><br>$\pm 0.020$ | 0.618<br>$\pm 0.056$ | 0.641<br>$\pm 0.048$ | 0.591<br>$\pm 0.031$ | 0.571<br>$\pm 0.037$ | 0.531<br>$\pm 0.045$  | 0.592<br>$\pm 0.042$        | 0.669<br>$\pm 0.058$        | 0.560<br>$\pm 0.081$  | 0.881<br>$\pm 0.020$        | 0.682<br>$\pm 0.037$  | 0.634<br>$\pm 0.053$ | 0.671<br>$\pm 0.049$ | 0.659<br>$\pm 0.021$ |
|                | BAcc     | 0.065<br>$\pm 0.038$ | 0.025<br>$\pm 0.018$ | 0.045<br>$\pm 0.033$ | 0.310<br>$\pm 0.038$        | 0.030<br>$\pm 0.041$ | 0.055<br>$\pm 0.037$ | 0.050<br>$\pm 0.025$ | 0.045<br>$\pm 0.033$ | 0.045<br>$\pm 0.027$  | 0.035<br>$\pm 0.029$        | 0.070<br>$\pm 0.045$        | 0.050<br>$\pm 0.018$  | <b>0.275</b><br>$\pm 0.079$ | 0.105<br>$\pm 0.027$  | 0.040<br>$\pm 0.014$ | 0.175<br>$\pm 0.075$ | 0.070<br>$\pm 0.021$ |
|                | Acc.1    | 0.065<br>$\pm 0.038$ | 0.025<br>$\pm 0.018$ | 0.045<br>$\pm 0.033$ | 0.310<br>$\pm 0.038$        | 0.030<br>$\pm 0.041$ | 0.072<br>$\pm 0.042$ | 0.041<br>$\pm 0.032$ | 0.037<br>$\pm 0.024$ | 0.037<br>$\pm 0.034$  | 0.041<br>$\pm 0.042$        | 0.081<br>$\pm 0.043$        | 0.041<br>$\pm 0.014$  | <b>0.219</b><br>$\pm 0.076$ | 0.141<br>$\pm 0.077$  | 0.044<br>$\pm 0.032$ | 0.194<br>$\pm 0.094$ | 0.072<br>$\pm 0.054$ |
|                | Acc.2    | 0.130<br>$\pm 0.037$ | 0.050<br>$\pm 0.035$ | 0.100<br>$\pm 0.050$ | 0.420<br>$\pm 0.057$        | 0.080<br>$\pm 0.060$ | 0.150<br>$\pm 0.038$ | 0.075<br>$\pm 0.052$ | 0.084<br>$\pm 0.046$ | 0.066<br>$\pm 0.069$  | 0.078<br>$\pm 0.057$        | 0.156<br>$\pm 0.040$        | 0.062<br>$\pm 0.027$  | <b>0.375</b><br>$\pm 0.120$ | 0.247<br>$\pm 0.074$  | 0.069<br>$\pm 0.045$ | 0.272<br>$\pm 0.071$ | 0.109<br>$\pm 0.065$ |
| Subject15_sync | $\kappa$ | 0.000<br>$\pm 0.000$ | 0.005<br>$\pm 0.021$ | 0.005<br>$\pm 0.028$ | <b>0.031</b><br>$\pm 0.028$ | 0.010<br>$\pm 0.023$ | 0.005<br>$\pm 0.028$ | 0.036<br>$\pm 0.034$ | 0.021<br>$\pm 0.049$ | -0.010<br>$\pm 0.014$ | 0.015<br>$\pm 0.034$        | 0.010<br>$\pm 0.014$        | 0.015<br>$\pm 0.029$  | 0.015<br>$\pm 0.029$        | -0.005<br>$\pm 0.011$ | 0.005<br>$\pm 0.028$ | 0.010<br>$\pm 0.034$ | 0.000<br>$\pm 0.026$ |
|                | AUC      | 0.516<br>$\pm 0.052$ | 0.517<br>$\pm 0.025$ | 0.502<br>$\pm 0.020$ | <b>0.616</b><br>$\pm 0.024$ | 0.525<br>$\pm 0.033$ | 0.507<br>$\pm 0.073$ | 0.535<br>$\pm 0.039$ | 0.557<br>$\pm 0.062$ | 0.496<br>$\pm 0.075$  | 0.537<br>$\pm 0.055$        | 0.547<br>$\pm 0.025$        | 0.510<br>$\pm 0.065$  | 0.644<br>$\pm 0.029$        | 0.483<br>$\pm 0.047$  | 0.544<br>$\pm 0.060$ | 0.567<br>$\pm 0.039$ | 0.554<br>$\pm 0.034$ |
|                | BAcc     | 0.025<br>$\pm 0.000$ | 0.030<br>$\pm 0.021$ | 0.030<br>$\pm 0.027$ | <b>0.055</b><br>$\pm 0.027$ | 0.035<br>$\pm 0.022$ | 0.030<br>$\pm 0.027$ | 0.060<br>$\pm 0.034$ | 0.045<br>$\pm 0.048$ | 0.015<br>$\pm 0.014$  | 0.040<br>$\pm 0.034$        | 0.035<br>$\pm 0.014$        | 0.040<br>$\pm 0.029$  | 0.040<br>$\pm 0.029$        | 0.020<br>$\pm 0.011$  | 0.030<br>$\pm 0.027$ | 0.035<br>$\pm 0.034$ | 0.025<br>$\pm 0.025$ |
|                | Acc.1    | 0.025<br>$\pm 0.000$ | 0.030<br>$\pm 0.021$ | 0.030<br>$\pm 0.027$ | <b>0.055</b><br>$\pm 0.027$ | 0.035<br>$\pm 0.022$ | 0.028<br>$\pm 0.026$ | 0.075<br>$\pm 0.050$ | 0.037<br>$\pm 0.050$ | 0.009<br>$\pm 0.009$  | 0.044<br>$\pm 0.057$        | 0.050<br>$\pm 0.046$        | 0.025<br>$\pm 0.018$  | 0.053<br>$\pm 0.038$        | 0.022<br>$\pm 0.024$  | 0.028<br>$\pm 0.032$ | 0.022<br>$\pm 0.021$ | 0.016<br>$\pm 0.016$ |
|                | Acc.2    | 0.070<br>$\pm 0.021$ | 0.045<br>$\pm 0.033$ | 0.055<br>$\pm 0.027$ | 0.085<br>$\pm 0.029$        | 0.065<br>$\pm 0.058$ | 0.056<br>$\pm 0.039$ | 0.087<br>$\pm 0.055$ | 0.081<br>$\pm 0.064$ | 0.031<br>$\pm 0.031$  | 0.094<br>$\pm 0.062$        | <b>0.091</b><br>$\pm 0.049$ | 0.047<br>$\pm 0.033$  | 0.069<br>$\pm 0.036$        | 0.031<br>$\pm 0.029$  | 0.062<br>$\pm 0.063$ | 0.050<br>$\pm 0.013$ | 0.031<br>$\pm 0.037$ |
| Subject16_sync | $\kappa$ | 0.036<br>$\pm 0.029$ | 0.005<br>$\pm 0.028$ | 0.015<br>$\pm 0.023$ | 0.082<br>$\pm 0.088$        | 0.036<br>$\pm 0.039$ | 0.010<br>$\pm 0.029$ | 0.010<br>$\pm 0.043$ | 0.036<br>$\pm 0.029$ | 0.005<br>$\pm 0.021$  | <b>0.072</b><br>$\pm 0.066$ | 0.015<br>$\pm 0.039$        | -0.005<br>$\pm 0.021$ | 0.056<br>$\pm 0.042$        | 0.031<br>$\pm 0.033$  | 0.005<br>$\pm 0.021$ | 0.026<br>$\pm 0.041$ | 0.010<br>$\pm 0.039$ |

Continued on next page



| Subject        | Metric | DeepConvnet                    | EEGNet           | Conformer       | CTNet                          | SSVEPDNN        | BIOT <sup>(i)</sup>            | BIOT <sup>(i)</sup> | BENDR <sup>(i)</sup> | BENDR <sup>(i)</sup> | CBraMod <sup>(i)</sup>         | CBraMod <sup>(i)</sup> | EEGPT <sup>(i)</sup> | EEGPT <sup>(i)</sup>           | LaBraM <sup>(i)</sup>          | LaBraM <sup>(i)</sup> | STEEGformer-s <sup>(i)</sup> | STEEGformer-s <sup>(i)</sup> |
|----------------|--------|--------------------------------|------------------|-----------------|--------------------------------|-----------------|--------------------------------|---------------------|----------------------|----------------------|--------------------------------|------------------------|----------------------|--------------------------------|--------------------------------|-----------------------|------------------------------|------------------------------|
|                | AUC    | 0.586<br>±0.049                | 0.546<br>±0.027  | 0.555<br>±0.044 | 0.653<br>± 0.038               | 0.569<br>±0.046 | 0.581<br>±0.023                | 0.516<br>±0.045     | 0.557<br>±0.029      | 0.517<br>±0.037      | <b>0.623</b><br>± <b>0.048</b> | 0.595<br>±0.052        | 0.557<br>±0.052      | 0.607<br>±0.060                | 0.560<br>±0.069                | 0.514<br>±0.048       | 0.568<br>±0.030              | 0.558<br>±0.056              |
|                |        | 0.060<br>±0.029                | 0.030<br>±0.027  | 0.040<br>±0.022 | 0.105<br>± 0.086               | 0.060<br>±0.038 | 0.035<br>±0.029                | 0.035<br>±0.042     | 0.060<br>±0.029      | 0.030<br>±0.021      | <b>0.095</b><br>± <b>0.065</b> | 0.040<br>±0.038        | 0.020<br>±0.021      | 0.080<br>±0.041                | 0.055<br>±0.033                | 0.030<br>±0.021       | 0.050<br>±0.040              | 0.035<br>±0.038              |
|                | BAcc   | 0.060<br>±0.029                | 0.030<br>±0.027  | 0.040<br>±0.022 | <b>0.105</b><br>± <b>0.086</b> | 0.060<br>±0.038 | 0.031<br>±0.037                | 0.041<br>±0.050     | 0.056<br>±0.042      | 0.028<br>±0.030      | 0.106<br>± 0.091               | 0.053<br>±0.049        | 0.022<br>±0.032      | 0.059<br>±0.042                | 0.044<br>±0.020                | 0.028<br>±0.030       | 0.050<br>±0.036              | 0.022<br>±0.024              |
|                |        | 0.090<br>±0.022                | 0.080<br>±0.011  | 0.070<br>±0.037 | <b>0.130</b><br>± <b>0.086</b> | 0.095<br>±0.033 | 0.075<br>±0.078                | 0.078<br>±0.063     | 0.081<br>±0.023      | 0.031<br>±0.037      | 0.178<br>± 0.102               | 0.103<br>±0.059        | 0.053<br>±0.065      | 0.078<br>±0.054                | 0.075<br>±0.030                | 0.056<br>±0.024       | 0.087<br>±0.045              | 0.069<br>±0.041              |
|                | Acc.1  | 0.015<br>±0.023                | 0.010<br>±0.029  | 0.021<br>±0.038 | 0.164<br>± 0.069               | 0.062<br>±0.023 | 0.082<br>±0.058                | 0.015<br>±0.029     | 0.026<br>±0.018      | 0.021<br>±0.033      | 0.046<br>±0.021                | 0.036<br>±0.029        | 0.005<br>±0.028      | <b>0.123</b><br>± <b>0.064</b> | 0.041<br>±0.023                | 0.000<br>±0.026       | 0.082<br>±0.058              | 0.000<br>±0.031              |
|                |        | 0.638<br>±0.046                | 0.579<br>±0.021  | 0.569<br>±0.018 | <b>0.762</b><br>± <b>0.040</b> | 0.654<br>±0.037 | 0.616<br>±0.062                | 0.598<br>±0.009     | 0.571<br>±0.084      | 0.530<br>±0.035      | 0.603<br>±0.025                | 0.581<br>±0.055        | 0.539<br>±0.036      | 0.778<br>± 0.044               | 0.621<br>±0.032                | 0.574<br>±0.073       | 0.644<br>±0.052              | 0.605<br>±0.035              |
|                | BAcc   | 0.040<br>±0.022                | 0.035<br>±0.029  | 0.045<br>±0.037 | 0.185<br>± 0.068               | 0.085<br>±0.022 | 0.105<br>±0.057                | 0.040<br>±0.029     | 0.050<br>±0.018      | 0.045<br>±0.033      | 0.070<br>±0.021                | 0.060<br>±0.029        | 0.030<br>±0.027      | <b>0.145</b><br>± <b>0.062</b> | 0.065<br>±0.022                | 0.025<br>±0.025       | 0.105<br>±0.057              | 0.025<br>±0.031              |
|                |        | 0.040<br>±0.022                | 0.035<br>±0.029  | 0.045<br>±0.037 | 0.185<br>± 0.068               | 0.085<br>±0.022 | 0.113<br>±0.062                | 0.044<br>±0.036     | 0.050<br>±0.034      | 0.037<br>±0.036      | 0.081<br>±0.023                | 0.075<br>±0.052        | 0.037<br>±0.039      | <b>0.147</b><br>± <b>0.099</b> | 0.059<br>±0.039                | 0.016<br>±0.016       | 0.094<br>±0.049              | 0.016<br>±0.019              |
|                | Acc.2  | 0.120<br>±0.048                | 0.090<br>±0.022  | 0.090<br>±0.052 | 0.265<br>± 0.084               | 0.155<br>±0.054 | 0.191<br>±0.042                | 0.103<br>±0.048     | 0.081<br>±0.013      | 0.078<br>±0.053      | 0.113<br>±0.050                | 0.122<br>±0.026        | 0.062<br>±0.063      | <b>0.263</b><br>± <b>0.091</b> | 0.134<br>±0.042                | 0.031<br>±0.016       | 0.141<br>±0.073              | 0.075<br>±0.043              |
|                |        | 0.082<br>±0.084                | -0.021<br>±0.011 | 0.036<br>±0.043 | 0.246<br>± 0.090               | 0.056<br>±0.064 | <b>0.164</b><br>± <b>0.059</b> | 0.036<br>±0.043     | 0.015<br>±0.023      | 0.010<br>±0.014      | 0.026<br>±0.018                | 0.046<br>±0.033        | 0.010<br>±0.014      | 0.072<br>±0.049                | 0.072<br>±0.066                | 0.015<br>±0.029       | 0.108<br>±0.053              | 0.026<br>±0.031              |
| Subject17_sync | AUC    | 0.726<br>±0.110                | 0.526<br>±0.037  | 0.547<br>±0.051 | 0.873<br>± 0.037               | 0.637<br>±0.065 | <b>0.782</b><br>± <b>0.064</b> | 0.636<br>±0.045     | 0.541<br>±0.062      | 0.504<br>±0.066      | 0.570<br>±0.061                | 0.647<br>±0.041        | 0.529<br>±0.047      | 0.723<br>±0.052                | 0.658<br>±0.081                | 0.521<br>±0.039       | 0.665<br>±0.053              | 0.623<br>±0.039              |
|                |        | 0.105<br>±0.082                | 0.005<br>±0.011  | 0.060<br>±0.042 | 0.265<br>± 0.088               | 0.080<br>±0.062 | <b>0.185</b><br>± <b>0.058</b> | 0.060<br>±0.042     | 0.040<br>±0.022      | 0.035<br>±0.014      | 0.050<br>±0.018                | 0.070<br>±0.033        | 0.035<br>±0.014      | 0.095<br>±0.048                | 0.095<br>±0.065                | 0.040<br>±0.029       | 0.130<br>±0.051              | 0.050<br>±0.031              |
|                | BAcc   | 0.105<br>±0.082                | 0.005<br>±0.011  | 0.060<br>±0.042 | 0.265<br>± 0.088               | 0.080<br>±0.062 | <b>0.172</b><br>± <b>0.052</b> | 0.047<br>±0.037     | 0.044<br>±0.039      | 0.031<br>±0.027      | 0.041<br>±0.030                | 0.109<br>±0.070        | 0.031<br>±0.027      | 0.106<br>±0.030                | 0.106<br>±0.097                | 0.034<br>±0.030       | 0.128<br>±0.057              | 0.050<br>±0.037              |
|                |        | 0.185<br>±0.138                | 0.040<br>±0.042  | 0.075<br>±0.047 | 0.425<br>± 0.095               | 0.155<br>±0.107 | <b>0.275</b><br>± <b>0.103</b> | 0.094<br>±0.048     | 0.066<br>±0.056      | 0.066<br>±0.039      | 0.097<br>±0.053                | 0.175<br>±0.053        | 0.062<br>±0.043      | 0.225<br>±0.087                | 0.228<br>±0.131                | 0.069<br>±0.050       | 0.250<br>±0.077              | 0.100<br>±0.056              |
|                | Acc.1  | 0.036<br>±0.014                | 0.056<br>±0.042  | 0.072<br>±0.038 | 0.031<br>±0.042                | 0.041<br>±0.029 | 0.026<br>±0.036                | 0.031<br>±0.042     | 0.000<br>±0.018      | 0.015<br>±0.039      | 0.031<br>±0.046                | -0.005<br>±0.021       | -0.021<br>±0.011     | 0.056<br>±0.033                | <b>0.082</b><br>± <b>0.038</b> | 0.021<br>±0.033       | 0.087<br>± 0.053             | 0.062<br>±0.023              |
|                |        | <b>0.721</b><br>± <b>0.020</b> | 0.679<br>±0.035  | 0.707<br>±0.026 | 0.756<br>± 0.014               | 0.616<br>±0.010 | 0.611<br>±0.033                | 0.530<br>±0.049     | 0.574<br>±0.061      | 0.529<br>±0.041      | 0.607<br>±0.049                | 0.603<br>±0.033        | 0.506<br>±0.061      | 0.708<br>±0.024                | 0.674<br>±0.048                | 0.548<br>±0.050       | 0.719<br>±0.017              | 0.667<br>±0.039              |
|                | Acc.2  | 0.036<br>±0.014                | 0.056<br>±0.042  | 0.072<br>±0.038 | 0.031<br>±0.042                | 0.041<br>±0.029 | 0.026<br>±0.036                | 0.031<br>±0.042     | 0.000<br>±0.018      | 0.015<br>±0.039      | 0.031<br>±0.046                | -0.005<br>±0.021       | -0.021<br>±0.011     | 0.056<br>±0.033                | <b>0.082</b><br>± <b>0.038</b> | 0.021<br>±0.033       | 0.087<br>± 0.053             | 0.062<br>±0.023              |
|                |        | <b>0.721</b><br>± <b>0.020</b> | 0.679<br>±0.035  | 0.707<br>±0.026 | 0.756<br>± 0.014               | 0.616<br>±0.010 | 0.611<br>±0.033                | 0.530<br>±0.049     | 0.574<br>±0.061      | 0.529<br>±0.041      | 0.607<br>±0.049                | 0.603<br>±0.033        | 0.506<br>±0.061      | 0.708<br>±0.024                | 0.674<br>±0.048                | 0.548<br>±0.050       | 0.719<br>±0.017              | 0.667<br>±0.039              |
|                | AUC    | 0.036<br>±0.014                | 0.056<br>±0.042  | 0.072<br>±0.038 | 0.031<br>±0.042                | 0.041<br>±0.029 | 0.026<br>±0.036                | 0.031<br>±0.042     | 0.000<br>±0.018      | 0.015<br>±0.039      | 0.031<br>±0.046                | -0.005<br>±0.021       | -0.021<br>±0.011     | 0.056<br>±0.033                | <b>0.082</b><br>± <b>0.038</b> | 0.021<br>±0.033       | 0.087<br>± 0.053             | 0.062<br>±0.023              |
|                |        | <b>0.721</b><br>± <b>0.020</b> | 0.679<br>±0.035  | 0.707<br>±0.026 | 0.756<br>± 0.014               | 0.616<br>±0.010 | 0.611<br>±0.033                | 0.530<br>±0.049     | 0.574<br>±0.061      | 0.529<br>±0.041      | 0.607<br>±0.049                | 0.603<br>±0.033        | 0.506<br>±0.061      | 0.708<br>±0.024                | 0.674<br>±0.048                | 0.548<br>±0.050       | 0.719<br>±0.017              | 0.667<br>±0.039              |
|                | AUC    | 0.036<br>±0.014                | 0.056<br>±0.042  | 0.072<br>±0.038 | 0.031<br>±0.042                | 0.041<br>±0.029 | 0.026<br>±0.036                | 0.031<br>±0.042     | 0.000<br>±0.018      | 0.015<br>±0.039      | 0.031<br>±0.046                | -0.005<br>±0.021       | -0.021<br>±0.011     | 0.056<br>±0.033                | <b>0.082</b><br>± <b>0.038</b> | 0.021<br>±0.033       | 0.087<br>± 0.053             | 0.062<br>±0.023              |
|                |        | <b>0.721</b><br>± <b>0.020</b> | 0.679<br>±0.035  | 0.707<br>±0.026 | 0.756<br>± 0.014               | 0.616<br>±0.010 | 0.611<br>±0.033                | 0.530<br>±0.049     | 0.574<br>±0.061      | 0.529<br>±0.041      | 0.607<br>±0.049                | 0.603<br>±0.033        | 0.506<br>±0.061      | 0.708<br>±0.024                | 0.674<br>±0.048                | 0.548<br>±0.050       | 0.719<br>±0.017              | 0.667<br>±0.039              |

Continued on next page

| Subject        | Metric   | DeepConvnet     | EEGNet          | Conformer                      | CTNet                          | SSVEPDNN        | BIOT (f)         | BIOT (l)        | BENDR (f)       | BENDR (l)       | CBraMod (f)                    | CBraMod (l)      | EEGPT (f)        | EEGPT (l)                      | LaBraM (f)                     | LaBraM (l)       | STEEGformer-s (f) | STEEGformer-s (l) |
|----------------|----------|-----------------|-----------------|--------------------------------|--------------------------------|-----------------|------------------|-----------------|-----------------|-----------------|--------------------------------|------------------|------------------|--------------------------------|--------------------------------|------------------|-------------------|-------------------|
| Subject1_sync  | BAcc     | 0.060<br>±0.014 | 0.080<br>±0.041 | 0.095<br>±0.037                | 0.055<br>±0.041                | 0.065<br>±0.029 | 0.050<br>±0.035  | 0.055<br>±0.041 | 0.025<br>±0.018 | 0.040<br>±0.038 | 0.055<br>±0.045                | 0.020<br>±0.021  | 0.005<br>±0.011  | 0.080<br>±0.033                | <b>0.105</b><br>± <b>0.037</b> | 0.045<br>±0.033  | 0.110<br>± 0.052  | 0.085<br>±0.022   |
|                |          | 0.060<br>±0.014 | 0.080<br>±0.041 | <b>0.095</b><br>± <b>0.037</b> | 0.055<br>±0.041                | 0.065<br>±0.029 | 0.050<br>±0.061  | 0.044<br>±0.032 | 0.016<br>±0.011 | 0.044<br>±0.064 | 0.044<br>±0.043                | 0.041<br>±0.038  | 0.003<br>±0.007  | 0.087<br>±0.053                | 0.094<br>±0.049                | 0.047<br>±0.040  | 0.106<br>± 0.068  | 0.072<br>±0.036   |
|                | Acc.1    | 0.145<br>±0.051 | 0.140<br>±0.052 | 0.140<br>±0.049                | <b>0.190</b><br>± <b>0.072</b> | 0.100<br>±0.047 | 0.144<br>±0.087  | 0.056<br>±0.028 | 0.119<br>±0.106 | 0.075<br>±0.066 | 0.103<br>±0.075                | 0.069<br>±0.021  | 0.025<br>±0.021  | 0.119<br>±0.071                | 0.166<br>±0.083                | 0.072<br>±0.053  | 0.225<br>± 0.041  | 0.097<br>±0.051   |
|                |          | 0.145<br>±0.051 | 0.140<br>±0.052 | 0.140<br>±0.049                | <b>0.190</b><br>± <b>0.072</b> | 0.100<br>±0.047 | 0.144<br>±0.087  | 0.056<br>±0.028 | 0.119<br>±0.106 | 0.075<br>±0.066 | 0.103<br>±0.075                | 0.069<br>±0.021  | 0.025<br>±0.021  | 0.119<br>±0.071                | 0.166<br>±0.083                | 0.072<br>±0.053  | 0.225<br>± 0.041  | 0.097<br>±0.051   |
|                | $\kappa$ | 0.003<br>±0.030 | 0.006<br>±0.029 | 0.008<br>±0.027                | 0.010<br>±0.035                | 0.012<br>±0.035 | -0.003<br>±0.020 | 0.004<br>±0.024 | 0.001<br>±0.027 | 0.004<br>±0.031 | <b>0.012</b><br>± <b>0.027</b> | 0.016<br>± 0.027 | 0.002<br>±0.026  | 0.011<br>±0.024                | 0.007<br>±0.027                | 0.005<br>±0.024  | 0.003<br>±0.024   | 0.000<br>±0.020   |
|                |          | 0.539<br>±0.055 | 0.517<br>±0.044 | 0.522<br>±0.049                | <b>0.569</b><br>± <b>0.058</b> | 0.524<br>±0.050 | 0.515<br>±0.039  | 0.512<br>±0.041 | 0.501<br>±0.050 | 0.500<br>±0.035 | 0.547<br>±0.044                | 0.566<br>±0.065  | 0.505<br>±0.049  | 0.577<br>± 0.047               | 0.537<br>±0.044                | 0.514<br>±0.054  | 0.518<br>±0.053   | 0.523<br>±0.040   |
|                | BAcc     | 0.028<br>±0.030 | 0.030<br>±0.028 | 0.033<br>±0.026                | 0.035<br>±0.034                | 0.036<br>±0.034 | 0.022<br>±0.019  | 0.029<br>±0.023 | 0.026<br>±0.027 | 0.029<br>±0.030 | <b>0.037</b><br>± <b>0.026</b> | 0.040<br>± 0.026 | 0.027<br>±0.026  | 0.036<br>±0.023                | 0.031<br>±0.026                | 0.030<br>±0.023  | 0.028<br>±0.023   | 0.025<br>±0.020   |
|                |          | 0.028<br>±0.030 | 0.030<br>±0.028 | 0.033<br>±0.026                | 0.035<br>±0.034                | 0.036<br>±0.034 | 0.016<br>±0.019  | 0.023<br>±0.024 | 0.027<br>±0.033 | 0.027<br>±0.032 | <b>0.037</b><br>± <b>0.031</b> | 0.045<br>± 0.031 | 0.024<br>±0.026  | 0.028<br>±0.024                | 0.030<br>±0.031                | 0.024<br>±0.026  | 0.022<br>±0.019   | 0.020<br>±0.020   |
|                | Acc.1    | 0.059<br>±0.042 | 0.063<br>±0.035 | 0.064<br>±0.036                | <b>0.071</b><br>± <b>0.044</b> | 0.064<br>±0.040 | 0.037<br>±0.029  | 0.045<br>±0.032 | 0.047<br>±0.041 | 0.047<br>±0.033 | 0.070<br>±0.046                | 0.079<br>± 0.052 | 0.044<br>±0.032  | 0.059<br>±0.039                | 0.061<br>±0.042                | 0.040<br>±0.035  | 0.051<br>±0.042   | 0.039<br>±0.031   |
|                |          | 0.059<br>±0.042 | 0.063<br>±0.035 | 0.064<br>±0.036                | <b>0.071</b><br>± <b>0.044</b> | 0.064<br>±0.040 | 0.037<br>±0.029  | 0.045<br>±0.032 | 0.047<br>±0.041 | 0.047<br>±0.033 | 0.070<br>±0.046                | 0.079<br>± 0.052 | 0.044<br>±0.032  | 0.059<br>±0.039                | 0.061<br>±0.042                | 0.040<br>±0.035  | 0.051<br>±0.042   | 0.039<br>±0.031   |
| Subject20_sync | $\kappa$ | 0.010<br>±0.023 | 0.015<br>±0.029 | 0.092<br>±0.053                | 0.256<br>± 0.091               | 0.031<br>±0.028 | 0.062<br>±0.034  | 0.041<br>±0.034 | 0.046<br>±0.021 | 0.000<br>±0.026 | 0.067<br>±0.053                | 0.072<br>±0.046  | 0.041<br>±0.039  | <b>0.190</b><br>± <b>0.053</b> | 0.097<br>±0.056                | -0.010<br>±0.014 | 0.077<br>±0.018   | -0.005<br>±0.028  |
|                |          | 0.644<br>±0.046 | 0.607<br>±0.033 | 0.703<br>±0.041                | 0.846<br>± 0.040               | 0.632<br>±0.061 | 0.624<br>±0.041  | 0.591<br>±0.017 | 0.560<br>±0.041 | 0.507<br>±0.047 | 0.636<br>±0.012                | 0.673<br>±0.046  | 0.627<br>±0.032  | <b>0.837</b><br>± <b>0.040</b> | 0.659<br>±0.041                | 0.537<br>±0.071  | 0.667<br>±0.015   | 0.627<br>±0.042   |
|                | BAcc     | 0.035<br>±0.022 | 0.040<br>±0.029 | 0.115<br>±0.052                | 0.275<br>± 0.088               | 0.055<br>±0.027 | 0.085<br>±0.034  | 0.065<br>±0.034 | 0.070<br>±0.021 | 0.025<br>±0.025 | 0.090<br>±0.052                | 0.095<br>±0.045  | 0.065<br>±0.038  | <b>0.210</b><br>± <b>0.052</b> | 0.120<br>±0.054                | 0.015<br>±0.014  | 0.100<br>±0.018   | 0.020<br>±0.027   |
|                |          | 0.035<br>±0.022 | 0.040<br>±0.029 | 0.115<br>±0.052                | 0.275<br>± 0.088               | 0.055<br>±0.027 | 0.109<br>±0.079  | 0.078<br>±0.057 | 0.053<br>±0.032 | 0.034<br>±0.052 | 0.084<br>±0.054                | 0.078<br>±0.048  | 0.059<br>±0.039  | <b>0.244</b><br>± <b>0.074</b> | 0.103<br>±0.056                | 0.019<br>±0.026  | 0.081<br>±0.020   | 0.013<br>±0.017   |
|                | Acc.1    | 0.085<br>±0.034 | 0.105<br>±0.054 | 0.170<br>±0.062                | 0.420<br>± 0.091               | 0.120<br>±0.021 | 0.188<br>±0.080  | 0.116<br>±0.059 | 0.094<br>±0.053 | 0.059<br>±0.062 | 0.122<br>±0.074                | 0.144<br>±0.058  | 0.116<br>±0.045  | <b>0.397</b><br>± <b>0.061</b> | 0.181<br>±0.080                | 0.041<br>±0.036  | 0.172<br>±0.046   | 0.059<br>±0.049   |
|                |          | 0.085<br>±0.034 | 0.105<br>±0.054 | 0.170<br>±0.062                | 0.420<br>± 0.091               | 0.120<br>±0.021 | 0.188<br>±0.080  | 0.116<br>±0.059 | 0.094<br>±0.053 | 0.059<br>±0.062 | 0.122<br>±0.074                | 0.144<br>±0.058  | 0.116<br>±0.045  | <b>0.397</b><br>± <b>0.061</b> | 0.181<br>±0.080                | 0.041<br>±0.036  | 0.172<br>±0.046   | 0.059<br>±0.049   |
| Subject21_sync | $\kappa$ | 0.036<br>±0.023 | 0.041<br>±0.029 | 0.082<br>±0.021                | <b>0.174</b><br>± <b>0.098</b> | 0.015<br>±0.029 | 0.021<br>±0.021  | 0.021<br>±0.028 | 0.005<br>±0.033 | 0.021<br>±0.064 | 0.072<br>±0.042                | 0.010<br>±0.014  | -0.005<br>±0.021 | 0.226<br>± 0.056               | 0.036<br>±0.023                | 0.056<br>±0.049  | 0.123<br>±0.033   | 0.051<br>±0.018   |
|                |          | 0.658<br>±0.032 | 0.645<br>±0.046 | 0.701<br>±0.022                | <b>0.831</b><br>± <b>0.035</b> | 0.616<br>±0.054 | 0.571<br>±0.048  | 0.574<br>±0.027 | 0.573<br>±0.030 | 0.512<br>±0.041 | 0.671<br>±0.054                | 0.624<br>±0.062  | 0.516<br>±0.033  | 0.844<br>± 0.026               | 0.576<br>±0.034                | 0.644<br>±0.033  | 0.657<br>±0.067   | 0.651<br>±0.032   |
|                | AUC      | 0.060<br>±0.022 | 0.065<br>±0.029 | 0.105<br>±0.021                | <b>0.195</b><br>± <b>0.096</b> | 0.040<br>±0.029 | 0.045<br>±0.021  | 0.045<br>±0.027 | 0.030<br>±0.033 | 0.045<br>±0.062 | 0.095<br>±0.041                | 0.035<br>±0.014  | 0.020<br>±0.021  | 0.245<br>± 0.054               | 0.060<br>±0.022                | 0.080<br>±0.048  | 0.145<br>±0.033   | 0.075<br>±0.018   |
|                |          | 0.060<br>±0.022 | 0.065<br>±0.029 | 0.105<br>±0.021                | <b>0.195</b><br>± <b>0.096</b> | 0.040<br>±0.029 | 0.045<br>±0.021  | 0.045<br>±0.027 | 0.030<br>±0.033 | 0.045<br>±0.062 | 0.095<br>±0.041                | 0.035<br>±0.014  | 0.020<br>±0.021  | 0.245<br>± 0.054               | 0.060<br>±0.022                | 0.080<br>±0.048  | 0.145<br>±0.033   | 0.075<br>±0.018   |
|                | BAcc     | 0.036<br>±0.023 | 0.041<br>±0.029 | 0.082<br>±0.021                | <b>0.174</b><br>± <b>0.098</b> | 0.015<br>±0.029 | 0.021<br>±0.021  | 0.021<br>±0.028 | 0.005<br>±0.033 | 0.021<br>±0.064 | 0.072<br>±0.042                | 0.010<br>±0.014  | -0.005<br>±0.021 | 0.226<br>± 0.056               | 0.036<br>±0.023                | 0.056<br>±0.049  | 0.123<br>±0.033   | 0.051<br>±0.018   |
|                |          | 0.036<br>±0.023 | 0.041<br>±0.029 | 0.082<br>±0.021                | <b>0.174</b><br>± <b>0.098</b> | 0.015<br>±0.029 | 0.021<br>±0.021  | 0.021<br>±0.028 | 0.005<br>±0.033 | 0.021<br>±0.064 | 0.072<br>±0.042                | 0.010<br>±0.014  | -0.005<br>±0.021 | 0.226<br>± 0.056               | 0.036<br>±0.023                | 0.056<br>±0.049  | 0.123<br>±0.033   | 0.051<br>±0.018   |
|                | AUC      | 0.060<br>±0.022 | 0.065<br>±0.029 | 0.105<br>±0.021                | <b>0.195</b><br>± <b>0.096</b> | 0.040<br>±0.029 | 0.045<br>±0.021  | 0.045<br>±0.027 | 0.030<br>±0.033 | 0.045<br>±0.062 | 0.095<br>±0.041                | 0.035<br>±0.014  | 0.020<br>±0.021  | 0.245<br>± 0.054               | 0.060<br>±0.022                | 0.080<br>±0.048  | 0.145<br>±0.033   | 0.075<br>±0.018   |
|                |          | 0.060<br>±0.022 | 0.065<br>±0.029 | 0.105<br>±0.021                | <b>0.195</b><br>± <b>0.096</b> | 0.040<br>±0.029 | 0.045<br>±0.021  | 0.045<br>±0.027 | 0.030<br>±0.033 | 0.045<br>±0.062 | 0.095<br>±0.041                | 0.035<br>±0.014  | 0.020<br>±0.021  | 0.245<br>± 0.054               | 0.060<br>±0.022                | 0.080<br>±0.048  | 0.145<br>±0.033   | 0.075<br>±0.018   |
|                | BAcc     | 0.036<br>±0.023 | 0.041<br>±0.029 | 0.082<br>±0.021                | <b>0.174</b><br>± <b>0.098</b> | 0.015<br>±0.029 | 0.021<br>±0.021  | 0.021<br>±0.028 | 0.005<br>±0.033 | 0.021<br>±0.064 | 0.072<br>±0.042                | 0.010<br>±0.014  | -0.005<br>±0.021 | 0.226<br>± 0.056               | 0.036<br>±0.023                | 0.056<br>±0.049  | 0.123<br>±0.033   | 0.051<br>±0.018   |
|                |          | 0.036<br>±0.023 | 0.041<br>±0.029 | 0.082<br>±0.021                | <b>0.174</b><br>± <b>0.098</b> | 0.015<br>±0.029 | 0.021<br>±0.021  | 0.021<br>±0.028 | 0.005<br>±0.033 | 0.021<br>±0.064 | 0.072<br>±0.042                | 0.010<br>±0.014  | -0.005<br>±0.021 | 0.226<br>± 0.056               | 0.036<br>±0.023                | 0.056<br>±0.049  | 0.123<br>±0.033   | 0.051<br>±0.018   |
|                | AUC      | 0.060<br>±0.022 | 0.065<br>±0.029 | 0.105<br>±0.021                | <b>0.195</b><br>± <b>0.096</b> | 0.040<br>±0.029 | 0.045<br>±0.021  | 0.045<br>±0.027 | 0.030<br>±0.033 | 0.045<br>±0.062 | 0.095<br>±0.041                | 0.035<br>±0.014  | 0.020<br>±0.021  | 0.245<br>± 0.054               | 0.060<br>±0.022                | 0.080<br>±0.048  | 0.145<br>±0.033   | 0.075<br>±0.018   |
|                |          | 0.060<br>±0.022 | 0.065<br>±0.029 | 0.105<br>±0.021                | <b>0.195</b><br>± <b>0.096</b> | 0.040<br>±0.029 | 0.045<br>±0.021  | 0.045<br>±0.027 | 0.030<br>±0.033 | 0.045<br>±0.062 | 0.095<br>±0.041                | 0.035<br>±0.014  | 0.020<br>±0.021  | 0.245<br>± 0.054               | 0.060<br>±0.022                | 0.080<br>±0.048  | 0.145<br>±0.033   | 0.075<br>±0.018   |

Continued on next page

| Subject        | Metric   | DeepConvnet      | EEGNet           | Conformer       | CTNet                          | SSVEPDNN        | BIOT <sup>(i)</sup> | BIOT <sup>(i)</sup> | BENDR <sup>(i)</sup> | BENDR <sup>(i)</sup> | CBraMod <sup>(i)</sup> | CBraMod <sup>(i)</sup> | EEGPT <sup>(i)</sup> | EEGPT <sup>(i)</sup>           | LaBraM <sup>(i)</sup> | LaBraM <sup>(i)</sup> | STEEGformer-s <sup>(i)</sup> | STEEGformer-s <sup>(i)</sup> |
|----------------|----------|------------------|------------------|-----------------|--------------------------------|-----------------|---------------------|---------------------|----------------------|----------------------|------------------------|------------------------|----------------------|--------------------------------|-----------------------|-----------------------|------------------------------|------------------------------|
| Subject22_sync | Acc.1    | 0.060<br>±0.022  | 0.065<br>±0.029  | 0.105<br>±0.021 | <b>0.195</b><br>± <b>0.096</b> | 0.040<br>±0.029 | 0.047<br>±0.037     | 0.056<br>±0.051     | 0.028<br>±0.039      | 0.056<br>±0.078      | 0.097<br>±0.053        | 0.041<br>±0.028        | 0.013<br>±0.013      | 0.228<br>± 0.056               | 0.056<br>±0.036       | 0.050<br>±0.030       | 0.147<br>±0.065              | 0.047<br>±0.011              |
|                |          | 0.135<br>±0.042  | 0.135<br>±0.045  | 0.155<br>±0.027 | <b>0.330</b><br>± <b>0.102</b> | 0.080<br>±0.054 | 0.094<br>±0.051     | 0.081<br>±0.053     | 0.044<br>±0.046      | 0.100<br>±0.083      | 0.147<br>±0.074        | 0.072<br>±0.032        | 0.028<br>±0.007      | 0.366<br>± 0.091               | 0.097<br>±0.030       | 0.091<br>±0.039       | 0.237<br>±0.099              | 0.087<br>±0.041              |
|                | $\kappa$ | 0.056<br>±0.038  | 0.051<br>±0.057  | 0.046<br>±0.021 | 0.421<br>± 0.069               | 0.087<br>±0.039 | 0.103<br>±0.018     | 0.087<br>±0.053     | 0.041<br>±0.034      | 0.000<br>±0.044      | 0.056<br>±0.033        | 0.031<br>±0.033        | 0.056<br>±0.033      | <b>0.323</b><br>± <b>0.097</b> | 0.123<br>±0.046       | 0.046<br>±0.033       | 0.123<br>±0.046              | 0.036<br>±0.059              |
|                |          | 0.696<br>±0.057  | 0.671<br>±0.055  | 0.663<br>±0.022 | 0.930<br>± 0.023               | 0.716<br>±0.034 | 0.666<br>±0.086     | 0.674<br>±0.091     | 0.617<br>±0.057      | 0.544<br>±0.056      | 0.631<br>±0.043        | 0.664<br>±0.041        | 0.638<br>±0.047      | <b>0.898</b><br>± <b>0.018</b> | 0.688<br>±0.025       | 0.603<br>±0.048       | 0.681<br>±0.047              | 0.660<br>±0.048              |
|                | BAcc     | 0.080<br>±0.037  | 0.075<br>±0.056  | 0.070<br>±0.021 | 0.435<br>± 0.068               | 0.110<br>±0.038 | 0.125<br>±0.018     | 0.110<br>±0.052     | 0.065<br>±0.034      | 0.025<br>±0.043      | 0.080<br>±0.033        | 0.055<br>±0.033        | 0.080<br>±0.033      | <b>0.340</b><br>± <b>0.095</b> | 0.145<br>±0.045       | 0.070<br>±0.033       | 0.145<br>±0.045              | 0.060<br>±0.058              |
|                |          | 0.080<br>±0.037  | 0.075<br>±0.056  | 0.070<br>±0.021 | 0.435<br>± 0.068               | 0.110<br>±0.038 | 0.181<br>±0.045     | 0.144<br>±0.070     | 0.059<br>±0.032      | 0.044<br>±0.068      | 0.106<br>±0.034        | 0.091<br>±0.058        | 0.116<br>±0.073      | <b>0.400</b><br>± <b>0.089</b> | 0.166<br>±0.024       | 0.053<br>±0.036       | 0.175<br>±0.064              | 0.037<br>±0.036              |
|                | Acc.2    | 0.155<br>±0.045  | 0.130<br>±0.033  | 0.115<br>±0.052 | 0.610<br>± 0.055               | 0.185<br>±0.042 | 0.281<br>±0.115     | 0.209<br>±0.050     | 0.138<br>±0.026      | 0.081<br>±0.113      | 0.166<br>±0.053        | 0.150<br>±0.089        | 0.178<br>±0.056      | <b>0.575</b><br>± <b>0.036</b> | 0.266<br>±0.025       | 0.109<br>±0.083       | 0.266<br>±0.083              | 0.062<br>±0.053              |
|                | $\kappa$ | 0.026<br>±0.031  | 0.015<br>±0.023  | 0.000<br>±0.018 | 0.031<br>±0.038                | 0.010<br>±0.050 | 0.021<br>±0.011     | -0.005<br>±0.021    | -0.005<br>±0.021     | 0.005<br>±0.028      | 0.010<br>±0.014        | 0.021<br>±0.021        | 0.000<br>±0.031      | <b>0.036</b><br>± <b>0.050</b> | 0.031<br>±0.042       | -0.015<br>±0.014      | 0.051<br>± 0.051             | 0.031<br>±0.033              |
|                |          | 0.593<br>±0.061  | 0.565<br>±0.017  | 0.584<br>±0.022 | 0.637<br>± 0.027               | 0.521<br>±0.059 | 0.581<br>±0.050     | 0.543<br>±0.020     | 0.505<br>±0.048      | 0.504<br>±0.024      | 0.541<br>±0.025        | 0.563<br>±0.041        | 0.515<br>±0.071      | <b>0.603</b><br>± <b>0.055</b> | 0.569<br>±0.033       | 0.519<br>±0.036       | 0.542<br>±0.080              | 0.572<br>±0.051              |
|                | BAcc     | 0.050<br>±0.031  | 0.040<br>±0.022  | 0.025<br>±0.018 | 0.055<br>±0.037                | 0.035<br>±0.049 | 0.045<br>±0.011     | 0.020<br>±0.021     | 0.020<br>±0.021      | 0.030<br>±0.027      | 0.035<br>±0.014        | 0.045<br>±0.021        | 0.025<br>±0.031      | <b>0.060</b><br>± <b>0.049</b> | 0.055<br>±0.041       | 0.010<br>±0.014       | 0.075<br>± 0.050             | 0.055<br>±0.033              |
|                |          | 0.050<br>±0.031  | 0.040<br>±0.022  | 0.025<br>±0.018 | <b>0.055</b><br>± <b>0.037</b> | 0.035<br>±0.049 | 0.047<br>±0.029     | 0.022<br>±0.032     | 0.013<br>±0.013      | 0.028<br>±0.032      | 0.031<br>±0.019        | 0.047<br>±0.037        | 0.025<br>±0.028      | 0.066<br>± 0.072               | 0.034<br>±0.026       | 0.006<br>±0.009       | 0.066<br>± 0.040             | 0.053<br>±0.041              |
|                | Acc.2    | 0.090<br>±0.038  | 0.080<br>±0.033  | 0.085<br>±0.022 | <b>0.115</b><br>± <b>0.063</b> | 0.070<br>±0.054 | 0.116<br>± 0.076    | 0.044<br>±0.036     | 0.053<br>±0.024      | 0.053<br>±0.030      | 0.056<br>±0.018        | 0.062<br>±0.031        | 0.066<br>±0.034      | 0.097<br>±0.056                | 0.059<br>±0.030       | 0.062<br>±0.058       | 0.113<br>±0.089              | 0.075<br>±0.049              |
| Subject24_sync | $\kappa$ | -0.010<br>±0.023 | -0.005<br>±0.021 | 0.031<br>±0.061 | 0.103<br>± 0.087               | 0.036<br>±0.053 | 0.041<br>±0.050     | -0.005<br>±0.021    | 0.010<br>±0.039      | -0.005<br>±0.021     | 0.026<br>±0.031        | 0.051<br>±0.031        | 0.000<br>±0.031      | <b>0.077</b><br>± <b>0.044</b> | 0.046<br>±0.038       | 0.005<br>±0.021       | 0.015<br>±0.053              | 0.031<br>±0.038              |
|                |          | 0.558<br>±0.033  | 0.529<br>±0.044  | 0.541<br>±0.085 | <b>0.697</b><br>± <b>0.039</b> | 0.569<br>±0.065 | 0.579<br>±0.049     | 0.556<br>±0.056     | 0.589<br>±0.034      | 0.522<br>±0.079      | 0.590<br>±0.046        | 0.624<br>±0.026        | 0.551<br>±0.040      | 0.717<br>± 0.021               | 0.601<br>±0.037       | 0.544<br>±0.021       | 0.624<br>±0.030              | 0.616<br>±0.033              |
|                | BAcc     | 0.015<br>±0.022  | 0.020<br>±0.021  | 0.055<br>±0.060 | 0.125<br>± 0.085               | 0.060<br>±0.052 | 0.065<br>±0.049     | 0.020<br>±0.021     | 0.035<br>±0.038      | 0.020<br>±0.021      | 0.050<br>±0.031        | 0.075<br>±0.031        | 0.025<br>±0.031      | <b>0.100</b><br>± <b>0.043</b> | 0.070<br>±0.037       | 0.030<br>±0.021       | 0.040<br>±0.052              | 0.055<br>±0.037              |
|                |          | 0.015<br>±0.022  | 0.020<br>±0.021  | 0.055<br>±0.060 | 0.125<br>± 0.085               | 0.060<br>±0.052 | 0.097<br>±0.081     | 0.031<br>±0.037     | 0.050<br>±0.064      | 0.031<br>±0.037      | 0.059<br>±0.042        | 0.113<br>±0.037        | 0.025<br>±0.028      | <b>0.119</b><br>± <b>0.082</b> | 0.081<br>±0.062       | 0.037<br>±0.032       | 0.034<br>±0.040              | 0.053<br>±0.032              |

Continued on next page

| Subject        | Metric   | DeepConvnet                    | EEGNet           | Conformer       | CTNet                          | SSVEPDNN        | BIOT <sup>(i)</sup>            | BIOT <sup>(i)</sup> | BENDR <sup>(i)</sup> | BENDR <sup>(i)</sup> | CBraMod <sup>(i)</sup>         | CBraMod <sup>(i)</sup> | EEGPT <sup>(i)</sup> | EEGPT <sup>(i)</sup>           | LaBraM <sup>(i)</sup>          | LaBraM <sup>(i)</sup> | STEEGformer-s <sup>(i)</sup>   | STEEGformer-s <sup>(i)</sup> |
|----------------|----------|--------------------------------|------------------|-----------------|--------------------------------|-----------------|--------------------------------|---------------------|----------------------|----------------------|--------------------------------|------------------------|----------------------|--------------------------------|--------------------------------|-----------------------|--------------------------------|------------------------------|
|                | Acc.2    | 0.065<br>±0.014                | 0.030<br>±0.021  | 0.100<br>±0.053 | <b>0.220</b><br>± <b>0.089</b> | 0.100<br>±0.056 | 0.116<br>±0.087                | 0.087<br>±0.084     | 0.106<br>±0.037      | 0.050<br>±0.060      | 0.116<br>±0.078                | 0.178<br>±0.069        | 0.069<br>±0.079      | 0.234<br>± 0.038               | 0.159<br>±0.068                | 0.053<br>±0.032       | 0.116<br>±0.070                | 0.119<br>±0.053              |
| Subject25_sync | $\kappa$ | 0.077<br>±0.075                | 0.118<br>±0.069  | 0.113<br>±0.062 | 0.062<br>±0.039                | 0.128<br>±0.036 | 0.103<br>±0.036                | 0.046<br>±0.046     | 0.082<br>±0.033      | 0.000<br>±0.018      | 0.118<br>±0.053                | 0.041<br>±0.039        | 0.026<br>±0.044      | 0.056<br>±0.058                | <b>0.133</b><br>± <b>0.021</b> | 0.041<br>±0.023       | 0.138<br>± 0.047               | 0.072<br>±0.033              |
|                | AUC      | 0.767<br>±0.040                | 0.786<br>± 0.025 | 0.765<br>±0.019 | <b>0.775</b><br>± <b>0.040</b> | 0.767<br>±0.036 | 0.682<br>±0.037                | 0.675<br>±0.053     | 0.689<br>±0.047      | 0.564<br>±0.040      | 0.714<br>±0.038                | 0.727<br>±0.033        | 0.627<br>±0.030      | 0.716<br>±0.035                | 0.713<br>±0.035                | 0.612<br>±0.068       | 0.710<br>±0.040                | 0.686<br>±0.032              |
|                | BAcc     | 0.100<br>±0.073                | 0.140<br>±0.068  | 0.135<br>±0.060 | 0.085<br>±0.038                | 0.150<br>±0.035 | 0.125<br>±0.035                | 0.070<br>±0.045     | 0.105<br>±0.033      | 0.025<br>±0.018      | 0.140<br>±0.052                | 0.065<br>±0.038        | 0.050<br>±0.043      | 0.080<br>±0.057                | <b>0.155</b><br>± <b>0.021</b> | 0.065<br>±0.022       | 0.160<br>± 0.045               | 0.095<br>±0.033              |
|                | Acc.1    | 0.100<br>±0.073                | 0.140<br>±0.068  | 0.135<br>±0.060 | 0.085<br>±0.038                | 0.150<br>±0.035 | <b>0.163</b><br>± <b>0.059</b> | 0.053<br>±0.045     | 0.094<br>±0.044      | 0.025<br>±0.030      | 0.172<br>± 0.080               | 0.087<br>±0.045        | 0.041<br>±0.028      | 0.087<br>±0.074                | 0.059<br>± 0.053               | 0.059<br>±0.028       | 0.156<br>±0.038                | 0.097<br>±0.051              |
|                | Acc.2    | 0.195<br>±0.069                | 0.235<br>±0.074  | 0.260<br>±0.074 | 0.230<br>±0.080                | 0.230<br>±0.048 | 0.244<br>±0.041                | 0.128<br>±0.055     | 0.219<br>±0.069      | 0.069<br>±0.059      | 0.228<br>±0.108                | 0.184<br>±0.049        | 0.094<br>±0.037      | 0.163<br>±0.071                | <b>0.297</b><br>± <b>0.083</b> | 0.094<br>±0.043       | 0.325<br>± 0.072               | 0.206<br>±0.078              |
|                | $\kappa$ | 0.056<br>±0.056                | 0.010<br>±0.023  | 0.026<br>±0.065 | 0.144<br>± 0.043               | 0.051<br>±0.018 | 0.067<br>±0.064                | 0.015<br>±0.014     | 0.015<br>±0.039      | 0.010<br>±0.014      | 0.056<br>±0.046                | 0.041<br>±0.050        | 0.005<br>±0.033      | <b>0.082</b><br>± <b>0.058</b> | 0.051<br>±0.041                | 0.015<br>±0.034       | 0.051<br>±0.031                | 0.000<br>±0.026              |
|                | AUC      | 0.642<br>±0.077                | 0.582<br>±0.071  | 0.596<br>±0.046 | 0.784<br>± 0.053               | 0.642<br>±0.022 | 0.691<br>±0.059                | 0.621<br>±0.031     | 0.570<br>±0.022      | 0.531<br>±0.070      | 0.613<br>±0.023                | 0.668<br>±0.027        | 0.522<br>±0.047      | <b>0.709</b><br>± <b>0.052</b> | 0.662<br>±0.046                | 0.530<br>±0.048       | 0.648<br>±0.019                | 0.559<br>±0.039              |
|                | BAcc     | 0.080<br>±0.054                | 0.035<br>±0.022  | 0.050<br>±0.064 | 0.165<br>± 0.042               | 0.075<br>±0.018 | 0.090<br>±0.063                | 0.040<br>±0.014     | 0.040<br>±0.038      | 0.035<br>±0.014      | 0.080<br>±0.045                | 0.065<br>±0.049        | 0.030<br>±0.033      | <b>0.105</b><br>± <b>0.057</b> | 0.075<br>±0.040                | 0.040<br>±0.034       | 0.075<br>±0.031                | 0.025<br>±0.025              |
| Subject26_sync | Acc.1    | 0.080<br>±0.054                | 0.035<br>±0.022  | 0.050<br>±0.064 | 0.165<br>± 0.042               | 0.075<br>±0.018 | 0.084<br>±0.055                | 0.034<br>±0.026     | 0.053<br>±0.045      | 0.059<br>±0.026      | <b>0.087</b><br>± <b>0.056</b> | 0.050<br>±0.051        | 0.037<br>±0.041      | 0.084<br>±0.042                | 0.056<br>±0.042                | 0.034<br>±0.026       | 0.075<br>±0.017                | 0.034<br>±0.036              |
|                | Acc.2    | <b>0.170</b><br>± <b>0.087</b> | 0.070<br>±0.041  | 0.095<br>±0.051 | 0.280<br>± 0.048               | 0.145<br>±0.041 | 0.100<br>±0.046                | 0.119<br>±0.053     | 0.125<br>±0.071      | 0.075<br>±0.040      | 0.119<br>±0.049                | 0.081<br>±0.042        | 0.050<br>±0.045      | 0.156<br>±0.075                | 0.134<br>±0.041                | 0.072<br>±0.041       | 0.128<br>±0.037                | 0.066<br>±0.049              |
|                | $\kappa$ | 0.026<br>±0.041                | 0.000<br>±0.036  | 0.021<br>±0.021 | 0.026<br>±0.051                | 0.005<br>±0.033 | 0.000<br>±0.018                | 0.005<br>±0.011     | 0.005<br>±0.021      | 0.010<br>±0.029      | 0.026<br>±0.036                | 0.005<br>±0.028        | -0.021<br>±0.011     | <b>0.051</b><br>± <b>0.026</b> | 0.051<br>± 0.036               | 0.000<br>±0.031       | 0.036<br>±0.023                | 0.021<br>±0.021              |
|                | AUC      | 0.588<br>±0.068                | 0.541<br>±0.032  | 0.550<br>±0.023 | 0.622<br>± 0.042               | 0.540<br>±0.042 | 0.557<br>±0.035                | 0.505<br>±0.037     | 0.578<br>±0.039      | 0.507<br>±0.042      | <b>0.610</b><br>± <b>0.041</b> | 0.576<br>±0.042        | 0.475<br>±0.047      | 0.608<br>±0.061                | 0.592<br>±0.065                | 0.533<br>±0.037       | 0.582<br>±0.056                | 0.557<br>±0.054              |
|                | BAcc     | 0.050<br>±0.040                | 0.025<br>±0.035  | 0.045<br>±0.021 | 0.050<br>±0.050                | 0.030<br>±0.033 | 0.025<br>±0.018                | 0.030<br>±0.011     | 0.030<br>±0.021      | 0.035<br>±0.029      | 0.050<br>±0.035                | 0.030<br>±0.027        | 0.005<br>±0.011      | 0.075<br>± 0.025               | 0.075<br>± 0.035               | 0.025<br>±0.031       | <b>0.060</b><br>± <b>0.022</b> | 0.045<br>±0.021              |
|                | Acc.1    | 0.050<br>±0.040                | 0.025<br>±0.035  | 0.045<br>±0.021 | 0.050<br>±0.050                | 0.030<br>±0.033 | 0.025<br>±0.024                | 0.028<br>±0.028     | 0.047<br>±0.031      | 0.041<br>±0.038      | 0.041<br>±0.030                | 0.028<br>±0.032        | 0.013<br>±0.028      | <b>0.084</b><br>± <b>0.042</b> | 0.122<br>± 0.077               | 0.016<br>±0.019       | <b>0.084</b><br>± <b>0.056</b> | 0.037<br>±0.018              |
|                | Acc.2    | 0.105<br>±0.054                | 0.065<br>±0.022  | 0.095<br>±0.033 | 0.105<br>±0.060                | 0.070<br>±0.037 | 0.087<br>±0.028                | 0.037<br>±0.032     | 0.066<br>±0.037      | 0.078<br>±0.019      | 0.119<br>±0.069                | 0.050<br>±0.040        | 0.028<br>±0.039      | 0.119<br>±0.056                | 0.103<br>± 0.077               | 0.103<br>±0.050       | <b>0.159</b><br>± <b>0.073</b> | 0.047<br>±0.025              |

Continued on next page

| Subject        | Metric   | DeepConvnet                                      | EEGNet                      | Conformer                   | CTNet                                            | SSVEPDNN             | BIOT (f)                                         | BIOT (l)             | BENDR (f)             | BENDR (l)             | CBraMod (f)                                      | CBraMod (l)                                      | EEGPT (f)            | EEGPT (l)                                        | LaBraM (f)                                       | LaBraM (l)                  | STEEGformer-s (f)           | STEEGformer-s (l)    |
|----------------|----------|--------------------------------------------------|-----------------------------|-----------------------------|--------------------------------------------------|----------------------|--------------------------------------------------|----------------------|-----------------------|-----------------------|--------------------------------------------------|--------------------------------------------------|----------------------|--------------------------------------------------|--------------------------------------------------|-----------------------------|-----------------------------|----------------------|
| Subject28_sync | $\kappa$ | $\begin{matrix} 0.051 \\ \pm 0.041 \end{matrix}$ | 0.015<br>$\pm 0.023$        | 0.026<br>$\pm 0.031$        | <b>0.036</b><br>$\pm 0.014$                      | 0.026<br>$\pm 0.041$ | 0.015<br>$\pm 0.039$                             | 0.000<br>$\pm 0.026$ | 0.026<br>$\pm 0.041$  | 0.021<br>$\pm 0.049$  | <b>0.036</b><br>$\pm 0.029$                      | 0.005<br>$\pm 0.028$                             | 0.015<br>$\pm 0.023$ | -0.015<br>$\pm 0.014$                            | 0.031<br>$\pm 0.021$                             | 0.021<br>$\pm 0.021$        | <b>0.036</b><br>$\pm 0.039$ | 0.015<br>$\pm 0.039$ |
|                | AUC      | $\begin{matrix} 0.695 \\ \pm 0.033 \end{matrix}$ | 0.628<br>$\pm 0.026$        | <b>0.650</b><br>$\pm 0.015$ | 0.623<br>$\pm 0.027$                             | 0.641<br>$\pm 0.049$ | 0.569<br>$\pm 0.046$                             | 0.556<br>$\pm 0.062$ | 0.575<br>$\pm 0.029$  | 0.511<br>$\pm 0.056$  | 0.595<br>$\pm 0.019$                             | 0.585<br>$\pm 0.055$                             | 0.558<br>$\pm 0.033$ | 0.589<br>$\pm 0.021$                             | 0.544<br>$\pm 0.048$                             | 0.593<br>$\pm 0.049$        | 0.553<br>$\pm 0.039$        | 0.628<br>$\pm 0.041$ |
|                | BAcc     | $\begin{matrix} 0.075 \\ \pm 0.040 \end{matrix}$ | 0.040<br>$\pm 0.022$        | 0.050<br>$\pm 0.031$        | <b>0.060</b><br>$\pm 0.014$                      | 0.050<br>$\pm 0.040$ | 0.040<br>$\pm 0.038$                             | 0.025<br>$\pm 0.025$ | 0.050<br>$\pm 0.040$  | 0.045<br>$\pm 0.048$  | <b>0.060</b><br>$\pm 0.029$                      | 0.030<br>$\pm 0.027$                             | 0.040<br>$\pm 0.022$ | 0.010<br>$\pm 0.014$                             | 0.055<br>$\pm 0.021$                             | 0.045<br>$\pm 0.021$        | <b>0.060</b><br>$\pm 0.038$ | 0.040<br>$\pm 0.038$ |
|                | Acc.1    | $\begin{matrix} 0.075 \\ \pm 0.040 \end{matrix}$ | 0.040<br>$\pm 0.022$        | 0.050<br>$\pm 0.031$        | 0.060<br>$\pm 0.014$                             | 0.050<br>$\pm 0.040$ | 0.062<br>$\pm 0.040$                             | 0.016<br>$\pm 0.016$ | 0.041<br>$\pm 0.026$  | 0.037<br>$\pm 0.050$  | <b>0.066</b><br>$\pm 0.023$                      | 0.037<br>$\pm 0.039$                             | 0.044<br>$\pm 0.020$ | 0.016<br>$\pm 0.027$                             | 0.062<br>$\pm 0.053$                             | 0.056<br>$\pm 0.050$        | 0.056<br>$\pm 0.030$        | 0.034<br>$\pm 0.043$ |
|                | Acc.2    | <b>0.120</b><br>$\pm 0.037$                      | 0.090<br>$\pm 0.052$        | 0.080<br>$\pm 0.021$        | 0.075<br>$\pm 0.018$                             | 0.115<br>$\pm 0.052$ | $\begin{matrix} 0.131 \\ \pm 0.071 \end{matrix}$ | 0.047<br>$\pm 0.019$ | 0.072<br>$\pm 0.042$  | 0.072<br>$\pm 0.042$  | $\begin{matrix} 0.131 \\ \pm 0.041 \end{matrix}$ | 0.087<br>$\pm 0.053$                             | 0.056<br>$\pm 0.028$ | 0.072<br>$\pm 0.054$                             | 0.100<br>$\pm 0.042$                             | 0.113<br>$\pm 0.062$        | 0.091<br>$\pm 0.051$        | 0.097<br>$\pm 0.053$ |
| Subject29_sync | $\kappa$ | $\begin{matrix} 0.010 \\ \pm 0.023 \end{matrix}$ | <b>0.041</b><br>$\pm 0.039$ | 0.031<br>$\pm 0.028$        | 0.031<br>$\pm 0.028$                             | 0.005<br>$\pm 0.021$ | 0.005<br>$\pm 0.021$                             | 0.021<br>$\pm 0.033$ | 0.015<br>$\pm 0.023$  | 0.015<br>$\pm 0.029$  | 0.015<br>$\pm 0.029$                             | 0.026<br>$\pm 0.018$                             | 0.005<br>$\pm 0.011$ | $\begin{matrix} 0.046 \\ \pm 0.038 \end{matrix}$ | 0.041<br>$\pm 0.014$                             | 0.021<br>$\pm 0.021$        | 0.026<br>$\pm 0.031$        | 0.031<br>$\pm 0.064$ |
|                | AUC      | $\begin{matrix} 0.583 \\ \pm 0.029 \end{matrix}$ | 0.558<br>$\pm 0.040$        | 0.568<br>$\pm 0.038$        | 0.587<br>$\pm 0.062$                             | 0.548<br>$\pm 0.042$ | 0.503<br>$\pm 0.037$                             | 0.521<br>$\pm 0.054$ | 0.522<br>$\pm 0.041$  | 0.500<br>$\pm 0.026$  | 0.582<br>$\pm 0.057$                             | 0.593<br>$\pm 0.029$                             | 0.507<br>$\pm 0.027$ | $\begin{matrix} 0.645 \\ \pm 0.045 \end{matrix}$ | <b>0.618</b><br>$\pm 0.049$                      | 0.574<br>$\pm 0.045$        | 0.589<br>$\pm 0.054$        | 0.578<br>$\pm 0.026$ |
|                | BAcc     | $\begin{matrix} 0.035 \\ \pm 0.022 \end{matrix}$ | <b>0.065</b><br>$\pm 0.038$ | 0.055<br>$\pm 0.027$        | 0.055<br>$\pm 0.027$                             | 0.030<br>$\pm 0.021$ | 0.030<br>$\pm 0.021$                             | 0.045<br>$\pm 0.033$ | 0.040<br>$\pm 0.022$  | 0.040<br>$\pm 0.029$  | 0.040<br>$\pm 0.029$                             | 0.050<br>$\pm 0.018$                             | 0.030<br>$\pm 0.011$ | $\begin{matrix} 0.070 \\ \pm 0.037 \end{matrix}$ | <b>0.065</b><br>$\pm 0.014$                      | 0.045<br>$\pm 0.021$        | 0.050<br>$\pm 0.031$        | 0.055<br>$\pm 0.062$ |
|                | Acc.1    | $\begin{matrix} 0.035 \\ \pm 0.022 \end{matrix}$ | <b>0.065</b><br>$\pm 0.038$ | 0.055<br>$\pm 0.027$        | 0.055<br>$\pm 0.027$                             | 0.030<br>$\pm 0.021$ | 0.028<br>$\pm 0.030$                             | 0.056<br>$\pm 0.056$ | 0.044<br>$\pm 0.034$  | 0.053<br>$\pm 0.054$  | 0.025<br>$\pm 0.018$                             | 0.059<br>$\pm 0.039$                             | 0.028<br>$\pm 0.028$ | 0.053<br>$\pm 0.042$                             | $\begin{matrix} 0.069 \\ \pm 0.048 \end{matrix}$ | 0.056<br>$\pm 0.026$        | 0.050<br>$\pm 0.037$        | 0.044<br>$\pm 0.047$ |
|                | Acc.2    | $\begin{matrix} 0.080 \\ \pm 0.021 \end{matrix}$ | 0.100<br>$\pm 0.053$        | 0.080<br>$\pm 0.021$        | 0.070<br>$\pm 0.045$                             | 0.075<br>$\pm 0.025$ | 0.050<br>$\pm 0.037$                             | 0.081<br>$\pm 0.081$ | 0.091<br>$\pm 0.064$  | 0.066<br>$\pm 0.051$  | 0.053<br>$\pm 0.039$                             | 0.103<br>$\pm 0.053$                             | 0.069<br>$\pm 0.044$ | $\begin{matrix} 0.106 \\ \pm 0.051 \end{matrix}$ | $\begin{matrix} 0.119 \\ \pm 0.055 \end{matrix}$ | <b>0.116</b><br>$\pm 0.038$ | 0.113<br>$\pm 0.046$        | 0.091<br>$\pm 0.056$ |
| Subject2_sync  | $\kappa$ | $\begin{matrix} 0.001 \\ \pm 0.023 \end{matrix}$ | 0.004<br>$\pm 0.024$        | 0.007<br>$\pm 0.028$        | 0.007<br>$\pm 0.035$                             | 0.005<br>$\pm 0.028$ | 0.002<br>$\pm 0.021$                             | 0.004<br>$\pm 0.022$ | -0.001<br>$\pm 0.025$ | -0.001<br>$\pm 0.024$ | <b>0.020</b><br>$\pm 0.029$                      | $\begin{matrix} 0.021 \\ \pm 0.029 \end{matrix}$ | 0.002<br>$\pm 0.025$ | 0.015<br>$\pm 0.033$                             | 0.013<br>$\pm 0.028$                             | 0.006<br>$\pm 0.026$        | 0.006<br>$\pm 0.027$        | 0.007<br>$\pm 0.022$ |
|                | AUC      | $\begin{matrix} 0.542 \\ \pm 0.066 \end{matrix}$ | 0.525<br>$\pm 0.066$        | 0.522<br>$\pm 0.067$        | 0.545<br>$\pm 0.082$                             | 0.510<br>$\pm 0.065$ | 0.503<br>$\pm 0.051$                             | 0.513<br>$\pm 0.046$ | 0.499<br>$\pm 0.050$  | 0.498<br>$\pm 0.038$  | 0.552<br>$\pm 0.056$                             | <b>0.573</b><br>$\pm 0.062$                      | 0.505<br>$\pm 0.048$ | $\begin{matrix} 0.574 \\ \pm 0.066 \end{matrix}$ | 0.545<br>$\pm 0.048$                             | 0.523<br>$\pm 0.040$        | 0.519<br>$\pm 0.049$        | 0.526<br>$\pm 0.042$ |
|                | BAcc     | $\begin{matrix} 0.026 \\ \pm 0.023 \end{matrix}$ | 0.029<br>$\pm 0.023$        | 0.032<br>$\pm 0.028$        | 0.031<br>$\pm 0.034$                             | 0.030<br>$\pm 0.027$ | 0.027<br>$\pm 0.020$                             | 0.029<br>$\pm 0.022$ | 0.024<br>$\pm 0.025$  | 0.024<br>$\pm 0.023$  | <b>0.044</b><br>$\pm 0.028$                      | $\begin{matrix} 0.045 \\ \pm 0.029 \end{matrix}$ | 0.027<br>$\pm 0.025$ | 0.040<br>$\pm 0.032$                             | 0.038<br>$\pm 0.027$                             | 0.031<br>$\pm 0.025$        | 0.031<br>$\pm 0.026$        | 0.032<br>$\pm 0.022$ |
|                | Acc.1    | $\begin{matrix} 0.026 \\ \pm 0.023 \end{matrix}$ | 0.029<br>$\pm 0.023$        | 0.032<br>$\pm 0.028$        | 0.031<br>$\pm 0.034$                             | 0.030<br>$\pm 0.027$ | 0.033<br>$\pm 0.032$                             | 0.035<br>$\pm 0.032$ | 0.022<br>$\pm 0.027$  | 0.026<br>$\pm 0.031$  | $\begin{matrix} 0.048 \\ \pm 0.043 \end{matrix}$ | 0.042<br>$\pm 0.037$                             | 0.026<br>$\pm 0.034$ | <b>0.042</b><br>$\pm 0.043$                      | 0.041<br>$\pm 0.035$                             | 0.040<br>$\pm 0.039$        | 0.031<br>$\pm 0.033$        | 0.041<br>$\pm 0.035$ |
|                | Acc.2    | $\begin{matrix} 0.055 \\ \pm 0.033 \end{matrix}$ | 0.055<br>$\pm 0.032$        | 0.057<br>$\pm 0.034$        | 0.061<br>$\pm 0.044$                             | 0.061<br>$\pm 0.039$ | 0.066<br>$\pm 0.049$                             | 0.063<br>$\pm 0.043$ | 0.044<br>$\pm 0.040$  | 0.051<br>$\pm 0.044$  | $\begin{matrix} 0.085 \\ \pm 0.051 \end{matrix}$ | 0.076<br>$\pm 0.056$                             | 0.049<br>$\pm 0.041$ | 0.068<br>$\pm 0.057$                             | <b>0.079</b><br>$\pm 0.058$                      | 0.075<br>$\pm 0.043$        | 0.064<br>$\pm 0.045$        | 0.068<br>$\pm 0.043$ |
| Subject30_sync | $\kappa$ | $\begin{matrix} 0.005 \\ \pm 0.028 \end{matrix}$ | 0.021<br>$\pm 0.042$        | 0.010<br>$\pm 0.056$        | $\begin{matrix} 0.067 \\ \pm 0.034 \end{matrix}$ | 0.021<br>$\pm 0.033$ | 0.005<br>$\pm 0.028$                             | 0.005<br>$\pm 0.033$ | 0.031<br>$\pm 0.033$  | 0.015<br>$\pm 0.023$  | 0.026<br>$\pm 0.031$                             | 0.005<br>$\pm 0.021$                             | 0.021<br>$\pm 0.028$ | <b>0.046</b><br>$\pm 0.011$                      | 0.031<br>$\pm 0.038$                             | 0.005<br>$\pm 0.033$        | 0.000<br>$\pm 0.018$        | 0.015<br>$\pm 0.029$ |

Continued on next page

| Subject        | Metric   | DeepConvnet                    | EEGNet           | Conformer       | CTNet                          | SSVEPDNN        | BIOT (f)        | BIOT (l)        | BENDR (f)                      | BENDR (l)        | CBraMod (f)                  | CBraMod (l)      | EEGPT (f)       | EEGPT (l)                      | LaBraM (f)                     | LaBraM (l)       | STEEGformer-s (f)            | STEEGformer-s (l)              |
|----------------|----------|--------------------------------|------------------|-----------------|--------------------------------|-----------------|-----------------|-----------------|--------------------------------|------------------|------------------------------|------------------|-----------------|--------------------------------|--------------------------------|------------------|------------------------------|--------------------------------|
| Subject31_sync | AUC      | 0.593<br>±0.044                | 0.570<br>±0.065  | 0.559<br>±0.046 | <b>0.621</b><br>± <b>0.044</b> | 0.581<br>±0.042 | 0.553<br>±0.033 | 0.535<br>±0.045 | 0.565<br>±0.059                | 0.526<br>±0.024  | 0.593<br>±0.083              | 0.578<br>±0.060  | 0.538<br>±0.024 | <div>0.643<br/>± 0.028</div>   | 0.586<br>±0.050                | 0.515<br>±0.050  | 0.518<br>±0.019              | 0.541<br>±0.039                |
|                |          | 0.030<br>±0.027                | 0.045<br>±0.041  | 0.035<br>±0.055 | <div>0.090<br/>± 0.034</div>   | 0.045<br>±0.033 | 0.030<br>±0.027 | 0.030<br>±0.033 | 0.055<br>±0.033                | 0.040<br>±0.022  | 0.050<br>±0.031              | 0.030<br>±0.021  | 0.045<br>±0.027 | <b>0.070</b><br>± <b>0.011</b> | 0.055<br>±0.037                | 0.030<br>±0.033  | 0.025<br>±0.018              | 0.040<br>±0.029                |
|                | BAcc     | 0.030<br>±0.027                | 0.045<br>±0.041  | 0.035<br>±0.055 | <div>0.090<br/>± 0.034</div>   | 0.045<br>±0.033 | 0.037<br>±0.039 | 0.028<br>±0.039 | <b>0.062</b><br>± <b>0.080</b> | 0.034<br>±0.020  | 0.041<br>±0.039              | 0.028<br>±0.030  | 0.047<br>±0.038 | <b>0.062</b><br>± <b>0.029</b> | <b>0.062</b><br>± <b>0.049</b> | 0.056<br>±0.070  | 0.025<br>±0.024              | 0.044<br>±0.040                |
|                |          | 0.070<br>±0.033                | 0.070<br>±0.065  | 0.060<br>±0.045 | <b>0.105</b><br>± <b>0.033</b> | 0.095<br>±0.045 | 0.081<br>±0.023 | 0.075<br>±0.064 | 0.078<br>±0.089                | 0.087<br>±0.014  | 0.069<br>±0.048              | 0.056<br>±0.039  | 0.087<br>±0.053 | <div>0.109<br/>± 0.033</div>   | 0.103<br>±0.060                | 0.097<br>±0.068  | 0.047<br>±0.043              | 0.075<br>±0.040                |
|                | $\kappa$ | 0.021<br>±0.021                | -0.021<br>±0.011 | 0.036<br>±0.034 | 0.051<br>±0.054                | 0.036<br>±0.023 | 0.031<br>±0.011 | 0.036<br>±0.029 | 0.036<br>±0.029                | 0.031<br>±0.038  | 0.041<br>±0.023              | -0.005<br>±0.011 | 0.046<br>±0.033 | <div>0.067<br/>± 0.047</div>   | 0.051<br>±0.026                | -0.005<br>±0.028 | 0.056<br>±0.033              | <b>0.062</b><br>± <b>0.023</b> |
|                |          | 0.599<br>±0.041                | 0.532<br>±0.049  | 0.607<br>±0.028 | <b>0.636</b><br>± <b>0.024</b> | 0.569<br>±0.032 | 0.574<br>±0.047 | 0.540<br>±0.038 | 0.605<br>±0.031                | 0.532<br>±0.036  | 0.625<br>±0.043              | 0.529<br>±0.028  | 0.575<br>±0.023 | <div>0.675<br/>± 0.023</div>   | 0.592<br>±0.032                | 0.525<br>±0.034  | 0.585<br>±0.054              | 0.611<br>±0.072                |
|                | BAcc     | 0.045<br>±0.021                | 0.005<br>±0.011  | 0.060<br>±0.034 | 0.075<br>±0.053                | 0.060<br>±0.022 | 0.055<br>±0.011 | 0.060<br>±0.029 | 0.060<br>±0.029                | 0.055<br>±0.037  | 0.065<br>±0.022              | 0.020<br>±0.011  | 0.070<br>±0.033 | <div>0.090<br/>± 0.045</div>   | 0.075<br>±0.025                | 0.020<br>±0.027  | 0.080<br>±0.033              | <b>0.085</b><br>± <b>0.022</b> |
|                |          | 0.045<br>±0.021                | 0.005<br>±0.011  | 0.060<br>±0.034 | 0.075<br>±0.053                | 0.060<br>±0.022 | 0.091<br>±0.039 | 0.037<br>±0.018 | 0.066<br>±0.049                | 0.053<br>±0.046  | 0.097<br>±0.061              | 0.031<br>±0.029  | 0.053<br>±0.036 | <b>0.113</b><br>± <b>0.037</b> | 0.084<br>±0.046                | 0.013<br>±0.017  | 0.106<br>±0.039              | <div>0.128<br/>± 0.034</div>   |
|                | Acc.1    | 0.085<br>±0.042                | 0.035<br>±0.029  | 0.125<br>±0.047 | 0.125<br>±0.068                | 0.090<br>±0.029 | 0.125<br>±0.037 | 0.081<br>±0.039 | 0.091<br>±0.052                | 0.062<br>±0.053  | <div>0.163<br/>± 0.059</div> | 0.066<br>±0.030  | 0.069<br>±0.032 | 0.153<br>±0.064                | 0.131<br>±0.083                | 0.028<br>±0.020  | 0.150<br>±0.049              | <b>0.156</b><br>± <b>0.053</b> |
|                |          | 0.085<br>±0.042                | 0.035<br>±0.029  | 0.125<br>±0.047 | 0.125<br>±0.068                | 0.090<br>±0.029 | 0.125<br>±0.037 | 0.081<br>±0.039 | 0.091<br>±0.052                | 0.062<br>±0.053  | <div>0.163<br/>± 0.059</div> | 0.066<br>±0.030  | 0.069<br>±0.032 | 0.153<br>±0.064                | 0.131<br>±0.083                | 0.028<br>±0.020  | 0.150<br>±0.049              | <b>0.156</b><br>± <b>0.053</b> |
| Subject32_sync | $\kappa$ | 0.308<br>±0.063                | 0.026<br>±0.036  | 0.062<br>±0.064 | <div>0.421<br/>± 0.117</div>   | 0.169<br>±0.059 | 0.169<br>±0.064 | 0.082<br>±0.021 | 0.072<br>±0.061                | -0.005<br>±0.021 | 0.051<br>±0.048              | 0.068<br>±0.026  | 0.029<br>±0.027 | <b>0.390</b><br>± <b>0.053</b> | 0.144<br>±0.069                | 0.005<br>±0.011  | 0.133<br>±0.028              | 0.046<br>±0.028                |
|                |          | <b>0.943</b><br>± <b>0.022</b> | 0.617<br>±0.044  | 0.679<br>±0.077 | <div>0.949<br/>± 0.022</div>   | 0.780<br>±0.043 | 0.790<br>±0.036 | 0.750<br>±0.053 | 0.642<br>±0.036                | 0.516<br>±0.026  | 0.645<br>±0.009              | 0.728<br>±0.028  | 0.580<br>±0.041 | 0.928<br>±0.018                | 0.739<br>±0.052                | 0.595<br>±0.050  | 0.745<br>±0.050              | 0.663<br>±0.036                |
|                | BAcc     | 0.325<br>±0.061                | 0.050<br>±0.035  | 0.085<br>±0.063 | <div>0.435<br/>± 0.114</div>   | 0.190<br>±0.058 | 0.190<br>±0.063 | 0.105<br>±0.021 | 0.095<br>±0.060                | 0.020<br>±0.021  | 0.075<br>±0.047              | 0.092<br>±0.026  | 0.054<br>±0.027 | <b>0.405</b><br>± <b>0.051</b> | 0.165<br>±0.068                | 0.030<br>±0.011  | 0.155<br>±0.027              | 0.070<br>±0.027                |
|                |          | 0.325<br>±0.061                | 0.050<br>±0.035  | 0.085<br>±0.063 | <b>0.435</b><br>± <b>0.114</b> | 0.190<br>±0.058 | 0.194<br>±0.067 | 0.084<br>±0.018 | 0.078<br>±0.051                | 0.013<br>±0.013  | 0.084<br>±0.053              | 0.081<br>±0.039  | 0.047<br>±0.031 | <div>0.441<br/>± 0.046</div>   | 0.141<br>±0.056                | 0.028<br>±0.028  | 0.163<br>±0.055              | 0.053<br>±0.034                |
|                | Acc.1    | 0.515<br>±0.063                | 0.085<br>±0.052  | 0.160<br>±0.076 | <div>0.640<br/>± 0.140</div>   | 0.265<br>±0.091 | 0.319<br>±0.057 | 0.188<br>±0.089 | 0.138<br>±0.057                | 0.078<br>±0.049  | 0.147<br>±0.087              | 0.159<br>±0.055  | 0.076<br>±0.035 | <b>0.619</b><br>± <b>0.063</b> | 0.222<br>±0.065                | 0.075<br>±0.043  | 0.247<br>±0.084              | 0.109<br>±0.019                |
|                |          | 0.515<br>±0.063                | 0.085<br>±0.052  | 0.160<br>±0.076 | <div>0.640<br/>± 0.140</div>   | 0.265<br>±0.091 | 0.319<br>±0.057 | 0.188<br>±0.089 | 0.138<br>±0.057                | 0.078<br>±0.049  | 0.147<br>±0.087              | 0.159<br>±0.055  | 0.076<br>±0.035 | <b>0.619</b><br>± <b>0.063</b> | 0.222<br>±0.065                | 0.075<br>±0.043  | 0.247<br>±0.084              | 0.109<br>±0.019                |
| Subject33_sync | AUC      | 0.062<br>±0.053                | 0.031<br>±0.049  | 0.036<br>±0.034 | 0.062<br>±0.034                | 0.000<br>±0.026 | 0.026<br>±0.018 | 0.021<br>±0.021 | 0.046<br>±0.042                | 0.000<br>±0.031  | 0.051<br>±0.044              | 0.005<br>±0.042  | 0.036<br>±0.039 | <b>0.067</b><br>± <b>0.067</b> | 0.051<br>±0.041                | 0.026<br>±0.041  | <div>0.097<br/>± 0.058</div> | 0.021<br>±0.028                |
|                |          | <div>0.713<br/>± 0.022</div>   | 0.671<br>±0.018  | 0.683<br>±0.029 | <b>0.700</b><br>± <b>0.029</b> | 0.622<br>±0.034 | 0.589<br>±0.049 | 0.559<br>±0.027 | 0.609<br>±0.055                | 0.499<br>±0.012  | 0.609<br>±0.066              | 0.615<br>±0.045  | 0.539<br>±0.056 | 0.668<br>±0.015                | 0.601<br>±0.045                | 0.603<br>±0.046  | 0.650<br>±0.060              | 0.641<br>±0.020                |

Continued on next page

| Subject        | Metric   | DeepConvnet                    | EEGNet                         | Conformer       | CTNet                          | SSVEPDNN        | BIOT <sup>(i)</sup>            | BIOT <sup>(i)</sup> | BENDR <sup>(i)</sup> | BENDR <sup>(i)</sup> | CBraMod <sup>(i)</sup> | CBraMod <sup>(i)</sup> | EEGPT <sup>(i)</sup> | EEGPT <sup>(i)</sup>           | LaBraM <sup>(i)</sup>          | LaBraM <sup>(i)</sup> | STEEGformer-s <sup>(i)</sup>   | STEEGformer-s <sup>(i)</sup> |
|----------------|----------|--------------------------------|--------------------------------|-----------------|--------------------------------|-----------------|--------------------------------|---------------------|----------------------|----------------------|------------------------|------------------------|----------------------|--------------------------------|--------------------------------|-----------------------|--------------------------------|------------------------------|
| Subject34_sync | BAcc     | 0.085<br>±0.052                | 0.055<br>±0.048                | 0.060<br>±0.034 | 0.085<br>±0.034                | 0.025<br>±0.025 | 0.050<br>±0.018                | 0.045<br>±0.021     | 0.070<br>±0.041      | 0.025<br>±0.031      | 0.075<br>±0.043        | 0.030<br>±0.041        | 0.060<br>±0.038      | <b>0.090</b><br>± <b>0.065</b> | 0.075<br>±0.040                | 0.050<br>±0.040       | 0.120<br>± 0.057               | 0.045<br>±0.027              |
|                | Acc.1    | <b>0.085</b><br>± <b>0.052</b> | 0.055<br>±0.048                | 0.060<br>±0.034 | <b>0.085</b><br>± <b>0.034</b> | 0.025<br>±0.025 | 0.031<br>±0.011                | 0.047<br>±0.046     | 0.072<br>±0.048      | 0.016<br>±0.019      | 0.084<br>±0.077        | 0.019<br>±0.026        | 0.066<br>±0.047      | 0.084<br>±0.059                | 0.084<br>±0.060                | 0.069<br>±0.042       | 0.094<br>± 0.053               | 0.037<br>±0.028              |
|                | Acc.2    | 0.155<br>± 0.084               | 0.110<br>±0.034                | 0.115<br>±0.034 | 0.135<br>±0.045                | 0.085<br>±0.052 | 0.072<br>±0.038                | 0.103<br>±0.059     | 0.113<br>±0.053      | 0.037<br>±0.024      | 0.134<br>±0.081        | 0.075<br>±0.065        | 0.091<br>±0.045      | 0.109<br>±0.074                | 0.147<br>±0.053                | 0.109<br>±0.040       | <b>0.150</b><br>± <b>0.063</b> | 0.106<br>±0.058              |
|                | $\kappa$ | 0.036<br>±0.053                | 0.026<br>±0.026                | 0.056<br>±0.046 | <b>0.123</b><br>± <b>0.021</b> | 0.036<br>±0.043 | -0.010<br>±0.014               | 0.021<br>±0.021     | 0.041<br>±0.043      | -0.010<br>±0.023     | 0.046<br>±0.033        | 0.015<br>±0.039        | 0.010<br>±0.014      | 0.164<br>± 0.039               | 0.026<br>±0.018                | -0.005<br>±0.021      | 0.041<br>±0.034                | 0.021<br>±0.021              |
|                | AUC      | 0.565<br>±0.057                | 0.546<br>±0.073                | 0.617<br>±0.039 | <b>0.768</b><br>± <b>0.035</b> | 0.610<br>±0.045 | 0.518<br>±0.052                | 0.537<br>±0.030     | 0.576<br>±0.048      | 0.502<br>±0.050      | 0.635<br>±0.047        | 0.566<br>±0.039        | 0.566<br>±0.041      | 0.774<br>± 0.025               | 0.566<br>±0.014                | 0.477<br>±0.053       | 0.560<br>±0.059                | 0.526<br>±0.024              |
|                | BAcc     | 0.060<br>±0.052                | 0.050<br>±0.025                | 0.080<br>±0.045 | <b>0.145</b><br>± <b>0.021</b> | 0.060<br>±0.042 | 0.015<br>±0.014                | 0.045<br>±0.021     | 0.065<br>±0.042      | 0.015<br>±0.022      | 0.070<br>±0.033        | 0.040<br>±0.038        | 0.035<br>±0.014      | 0.185<br>± 0.038               | 0.050<br>±0.018                | 0.020<br>±0.021       | 0.065<br>±0.034                | 0.045<br>±0.021              |
|                | Acc.1    | 0.060<br>±0.052                | 0.050<br>±0.025                | 0.080<br>±0.045 | <b>0.145</b><br>± <b>0.021</b> | 0.060<br>±0.042 | 0.009<br>±0.009                | 0.047<br>±0.037     | 0.069<br>±0.063      | 0.009<br>±0.014      | 0.091<br>±0.051        | 0.044<br>±0.043        | 0.022<br>±0.009      | 0.219<br>± 0.029               | 0.059<br>±0.034                | 0.013<br>±0.013       | 0.050<br>±0.026                | 0.037<br>±0.018              |
|                | Acc.2    | 0.115<br>±0.029                | 0.070<br>±0.033                | 0.120<br>±0.041 | <b>0.205</b><br>± <b>0.048</b> | 0.110<br>±0.060 | 0.047<br>±0.022                | 0.062<br>±0.040     | 0.103<br>±0.057      | 0.031<br>±0.033      | 0.150<br>±0.061        | 0.081<br>±0.050        | 0.062<br>±0.029      | 0.284<br>± 0.085               | 0.100<br>±0.053                | 0.028<br>±0.026       | 0.116<br>±0.053                | 0.072<br>±0.024              |
|                | $\kappa$ | 0.046<br>±0.033                | <b>0.067</b><br>± <b>0.043</b> | 0.056<br>±0.011 | 0.092<br>± 0.039               | 0.046<br>±0.011 | 0.046<br>±0.028                | 0.015<br>±0.023     | 0.046<br>±0.056      | 0.021<br>±0.021      | 0.051<br>±0.075        | 0.021<br>±0.033        | 0.015<br>±0.039      | 0.051<br>±0.060                | <b>0.067</b><br>± <b>0.023</b> | 0.051<br>±0.036       | 0.062<br>±0.023                | 0.031<br>±0.033              |
|                | AUC      | 0.677<br>±0.062                | 0.685<br>±0.047                | 0.656<br>±0.035 | 0.707<br>± 0.054               | 0.665<br>±0.043 | 0.568<br>±0.036                | 0.558<br>±0.041     | 0.624<br>±0.039      | 0.540<br>±0.044      | 0.666<br>±0.021        | 0.600<br>±0.028        | 0.567<br>±0.044      | <b>0.702</b><br>± <b>0.028</b> | 0.601<br>±0.053                | 0.591<br>±0.038       | 0.613<br>±0.024                | 0.611<br>±0.070              |
| Subject35_sync | BAcc     | 0.070<br>±0.033                | <b>0.090</b><br>± <b>0.042</b> | 0.080<br>±0.011 | 0.115<br>± 0.038               | 0.070<br>±0.011 | 0.070<br>±0.027                | 0.040<br>±0.022     | 0.070<br>±0.054      | 0.045<br>±0.021      | 0.075<br>±0.073        | 0.045<br>±0.033        | 0.040<br>±0.038      | 0.075<br>±0.059                | <b>0.090</b><br>± <b>0.022</b> | 0.075<br>±0.035       | 0.085<br>±0.022                | 0.055<br>±0.033              |
|                | Acc.1    | 0.070<br>±0.033                | 0.090<br>±0.042                | 0.080<br>±0.011 | 0.115<br>± 0.038               | 0.070<br>±0.011 | <b>0.100</b><br>± <b>0.034</b> | 0.034<br>±0.034     | 0.081<br>±0.061      | 0.056<br>±0.026      | 0.075<br>±0.068        | 0.066<br>±0.055        | 0.034<br>±0.043      | 0.075<br>±0.075                | 0.084<br>±0.036                | 0.084<br>±0.053       | 0.081<br>±0.020                | 0.062<br>±0.040              |
|                | Acc.2    | 0.120<br>±0.033                | 0.175<br>±0.056                | 0.135<br>±0.072 | 0.200<br>± 0.050               | 0.125<br>±0.047 | <b>0.181</b><br>± <b>0.048</b> | 0.066<br>±0.040     | 0.128<br>±0.049      | 0.087<br>±0.051      | 0.144<br>±0.087        | 0.138<br>±0.075        | 0.066<br>±0.037      | 0.166<br>±0.069                | 0.178<br>±0.054                | 0.116<br>±0.051       | 0.122<br>±0.052                | 0.087<br>±0.054              |
|                | $\kappa$ | 0.074<br>±0.148                | 0.015<br>±0.043                | 0.041<br>±0.085 | 0.132<br>± 0.205               | 0.016<br>±0.038 | 0.058<br>±0.115                | 0.042<br>±0.094     | 0.028<br>±0.048      | 0.008<br>±0.036      | 0.012<br>±0.031        | 0.014<br>±0.031        | 0.038<br>±0.089      | 0.086<br>±0.152                | <b>0.092</b><br>± <b>0.166</b> | 0.006<br>±0.023       | 0.045<br>±0.095                | 0.007<br>±0.025              |
|                | AUC      | 0.669<br>±0.136                | 0.583<br>±0.079                | 0.601<br>±0.105 | <b>0.703</b><br>± <b>0.136</b> | 0.585<br>±0.082 | 0.608<br>±0.129                | 0.562<br>±0.115     | 0.581<br>±0.067      | 0.530<br>±0.043      | 0.534<br>±0.056        | 0.574<br>±0.066        | 0.585<br>±0.116      | 0.704<br>± 0.117               | 0.620<br>±0.134                | 0.531<br>±0.057       | 0.590<br>±0.106                | 0.526<br>±0.057              |
|                | BAcc     | 0.097<br>±0.144                | 0.039<br>±0.042                | 0.065<br>±0.083 | 0.154<br>± 0.199               | 0.041<br>±0.037 | 0.081<br>±0.112                | 0.066<br>±0.091     | 0.052<br>±0.046      | 0.033<br>±0.035      | 0.037<br>±0.030        | 0.039<br>±0.031        | 0.062<br>±0.087      | 0.109<br>±0.148                | <b>0.114</b><br>± <b>0.162</b> | 0.031<br>±0.023       | 0.069<br>±0.093                | 0.031<br>±0.025              |

Continued on next page

| Subject       | Metric   | DeepConvnet | EEGNet      | Conformer   | CTNet       | SSVEPDNN    | BIOT <sup>(i)</sup> | BIOT <sup>(i)</sup> | BENDR <sup>(i)</sup> | BENDR <sup>(i)</sup> | CBraMod <sup>(i)</sup> | CBraMod <sup>(i)</sup> | EEGPT <sup>(i)</sup> | EEGPT <sup>(i)</sup> | LaBraM <sup>(i)</sup> | LaBraM <sup>(i)</sup> | STEEGformer-s <sup>(i)</sup> | STEEGformer-s <sup>(i)</sup> |
|---------------|----------|-------------|-------------|-------------|-------------|-------------|---------------------|---------------------|----------------------|----------------------|------------------------|------------------------|----------------------|----------------------|-----------------------|-----------------------|------------------------------|------------------------------|
| Subject4_sync | Acc.1    | 0.097       | 0.039       | 0.065       | 0.154       | 0.041       | 0.095               | 0.064               | 0.047                | 0.033                | 0.033                  | 0.039                  | 0.064                | <b>0.111</b>         | 0.102                 | 0.034                 | 0.053                        | 0.026                        |
|               |          | $\pm 0.144$ | $\pm 0.042$ | $\pm 0.083$ | $\pm 0.199$ | $\pm 0.037$ | $\pm 0.126$         | $\pm 0.094$         | $\pm 0.043$          | $\pm 0.043$          | $\pm 0.032$            | $\pm 0.044$            | $\pm 0.089$          | $\pm 0.157$          | $\pm 0.168$           | $\pm 0.040$           | $\pm 0.079$                  | $\pm 0.027$                  |
|               | Acc.2    | 0.167       | 0.077       | 0.119       | 0.224       | 0.071       | 0.158               | 0.093               | 0.079                | 0.064                | 0.067                  | 0.064                  | 0.102                | <b>0.173</b>         | 0.162                 | 0.075                 | 0.101                        | 0.055                        |
|               |          | $\pm 0.206$ | $\pm 0.058$ | $\pm 0.120$ | $\pm 0.246$ | $\pm 0.046$ | $\pm 0.197$         | $\pm 0.126$         | $\pm 0.057$          | $\pm 0.055$          | $\pm 0.046$            | $\pm 0.052$            | $\pm 0.105$          | $\pm 0.205$          | $\pm 0.210$           | $\pm 0.050$           | $\pm 0.124$                  | $\pm 0.041$                  |
|               | $\kappa$ | 0.000       | 0.000       | 0.010       | -0.005      | 0.005       | 0.021               | 0.000               | 0.000                | 0.000                | 0.015                  | 0.028                  | 0.000                | <b>0.026</b>         | 0.010                 | 0.015                 | 0.010                        | -0.010                       |
|               |          | $\pm 0.018$ | $\pm 0.018$ | $\pm 0.023$ | $\pm 0.011$ | $\pm 0.021$ | $\pm 0.033$         | $\pm 0.026$         | $\pm 0.031$          | $\pm 0.026$          | $\pm 0.029$            | $\pm 0.024$            | $\pm 0.030$          | $\pm 0.060$          | $\pm 0.014$           | $\pm 0.029$           | $\pm 0.050$                  | $\pm 0.014$                  |
| Subject5_sync | AUC      | 0.501       | 0.526       | 0.532       | 0.562       | 0.531       | 0.532               | 0.532               | 0.509                | 0.506                | 0.563                  | 0.594                  | 0.511                | <b>0.567</b>         | 0.502                 | 0.494                 | 0.541                        | 0.494                        |
|               |          | $\pm 0.012$ | $\pm 0.046$ | $\pm 0.024$ | $\pm 0.019$ | $\pm 0.056$ | $\pm 0.051$         | $\pm 0.053$         | $\pm 0.050$          | $\pm 0.033$          | $\pm 0.007$            | $\pm 0.017$            | $\pm 0.052$          | $\pm 0.016$          | $\pm 0.057$           | $\pm 0.049$           | $\pm 0.065$                  | $\pm 0.017$                  |
|               | BAcc     | 0.025       | 0.025       | 0.035       | 0.020       | 0.030       | 0.045               | 0.025               | 0.025                | 0.025                | 0.040                  | 0.053                  | 0.025                | <b>0.050</b>         | 0.035                 | 0.040                 | 0.035                        | 0.015                        |
|               |          | $\pm 0.018$ | $\pm 0.018$ | $\pm 0.022$ | $\pm 0.011$ | $\pm 0.021$ | $\pm 0.033$         | $\pm 0.025$         | $\pm 0.031$          | $\pm 0.025$          | $\pm 0.029$            | $\pm 0.023$            | $\pm 0.029$          | $\pm 0.059$          | $\pm 0.014$           | $\pm 0.029$           | $\pm 0.049$                  | $\pm 0.014$                  |
|               | Acc.1    | 0.025       | 0.025       | 0.035       | 0.020       | 0.030       | 0.037               | 0.034               | 0.016                | 0.025                | 0.044                  | 0.059                  | 0.022                | 0.041                | <b>0.050</b>          | 0.044                 | 0.031                        | 0.009                        |
|               |          | $\pm 0.018$ | $\pm 0.018$ | $\pm 0.022$ | $\pm 0.011$ | $\pm 0.021$ | $\pm 0.036$         | $\pm 0.040$         | $\pm 0.019$          | $\pm 0.032$          | $\pm 0.036$            | $\pm 0.033$            | $\pm 0.025$          | $\pm 0.042$          | $\pm 0.032$           | $\pm 0.036$           | $\pm 0.044$                  | $\pm 0.009$                  |
| Subject6_sync | Acc.2    | 0.040       | 0.055       | 0.060       | 0.070       | 0.080       | 0.062               | 0.072               | 0.072                | 0.062                | <b>0.091</b>           | 0.120                  | 0.031                | 0.062                | 0.062                 | 0.075                 | 0.066                        | 0.047                        |
|               |          | $\pm 0.029$ | $\pm 0.033$ | $\pm 0.038$ | $\pm 0.041$ | $\pm 0.041$ | $\pm 0.059$         | $\pm 0.030$         | $\pm 0.032$          | $\pm 0.043$          | $\pm 0.053$            | $\pm 0.062$            | $\pm 0.024$          | $\pm 0.047$          | $\pm 0.025$           | $\pm 0.062$           | $\pm 0.053$                  | $\pm 0.037$                  |
|               | $\kappa$ | 0.472       | 0.062       | 0.236       | 0.621       | 0.103       | 0.354               | 0.221               | 0.087                | 0.015                | 0.021                  | 0.026                  | 0.221                | 0.477                | <b>0.554</b>          | 0.010                 | 0.277                        | 0.067                        |
|               |          | $\pm 0.153$ | $\pm 0.039$ | $\pm 0.076$ | $\pm 0.071$ | $\pm 0.087$ | $\pm 0.121$         | $\pm 0.082$         | $\pm 0.074$          | $\pm 0.039$          | $\pm 0.028$            | $\pm 0.036$            | $\pm 0.062$          | $\pm 0.047$          | $\pm 0.111$           | $\pm 0.023$           | $\pm 0.147$                  | $\pm 0.050$                  |
|               | AUC      | 0.940       | 0.679       | 0.838       | 0.978       | 0.717       | 0.877               | 0.847               | 0.704                | 0.593                | 0.611                  | 0.668                  | 0.839                | <b>0.951</b>         | 0.945                 | 0.547                 | 0.856                        | 0.601                        |
|               |          | $\pm 0.050$ | $\pm 0.053$ | $\pm 0.047$ | $\pm 0.016$ | $\pm 0.051$ | $\pm 0.068$         | $\pm 0.053$         | $\pm 0.086$          | $\pm 0.033$          | $\pm 0.033$            | $\pm 0.009$            | $\pm 0.013$          | $\pm 0.014$          | $\pm 0.028$           | $\pm 0.027$           | $\pm 0.030$                  | $\pm 0.022$                  |
| Subject4_sync | BAcc     | 0.485       | 0.085       | 0.255       | 0.630       | 0.125       | 0.370               | 0.240               | 0.110                | 0.040                | 0.045                  | 0.050                  | 0.240                | 0.490                | <b>0.565</b>          | 0.035                 | 0.295                        | 0.090                        |
|               |          | $\pm 0.150$ | $\pm 0.038$ | $\pm 0.074$ | $\pm 0.069$ | $\pm 0.085$ | $\pm 0.118$         | $\pm 0.080$         | $\pm 0.072$          | $\pm 0.038$          | $\pm 0.027$            | $\pm 0.035$            | $\pm 0.060$          | $\pm 0.045$          | $\pm 0.108$           | $\pm 0.022$           | $\pm 0.143$                  | $\pm 0.049$                  |
|               | Acc.1    | 0.485       | 0.085       | 0.255       | 0.630       | 0.125       | 0.344               | 0.244               | 0.106                | 0.034                | 0.056                  | 0.059                  | 0.281                | 0.503                | <b>0.569</b>          | 0.031                 | 0.281                        | 0.113                        |
|               |          | $\pm 0.150$ | $\pm 0.038$ | $\pm 0.074$ | $\pm 0.069$ | $\pm 0.085$ | $\pm 0.142$         | $\pm 0.085$         | $\pm 0.100$          | $\pm 0.034$          | $\pm 0.034$            | $\pm 0.043$            | $\pm 0.049$          | $\pm 0.083$          | $\pm 0.041$           | $\pm 0.029$           | $\pm 0.097$                  | $\pm 0.043$                  |
|               | Acc.2    | 0.615       | 0.145       | 0.360       | 0.835       | 0.175       | 0.494               | 0.428               | 0.184                | 0.053                | 0.094                  | 0.153                  | 0.412                | 0.678                | <b>0.747</b>          | 0.116                 | 0.469                        | 0.144                        |
|               |          | $\pm 0.168$ | $\pm 0.051$ | $\pm 0.128$ | $\pm 0.084$ | $\pm 0.085$ | $\pm 0.167$         | $\pm 0.054$         | $\pm 0.089$          | $\pm 0.042$          | $\pm 0.025$            | $\pm 0.043$            | $\pm 0.053$          | $\pm 0.087$          | $\pm 0.078$           | $\pm 0.036$           | $\pm 0.124$                  | $\pm 0.043$                  |
| Subject6_sync | $\kappa$ | 0.092       | 0.026       | 0.072       | 0.436       | 0.067       | 0.082               | 0.056               | 0.036                | 0.000                | 0.072                  | 0.005                  | 0.036                | <b>0.256</b>         | 0.128                 | 0.026                 | 0.138                        | 0.010                        |
|               |          | $\pm 0.108$ | $\pm 0.018$ | $\pm 0.021$ | $\pm 0.057$ | $\pm 0.029$ | $\pm 0.028$         | $\pm 0.042$         | $\pm 0.034$          | $\pm 0.031$          | $\pm 0.021$            | $\pm 0.021$            | $\pm 0.039$          | $\pm 0.048$          | $\pm 0.036$           | $\pm 0.018$           | $\pm 0.074$                  | $\pm 0.023$                  |
|               | AUC      | 0.711       | 0.595       | 0.627       | 0.957       | 0.603       | 0.689               | 0.650               | 0.588                | 0.486                | 0.612                  | 0.651                  | 0.617                | <b>0.888</b>         | 0.692                 | 0.518                 | 0.732                        | 0.599                        |
|               |          | $\pm 0.131$ | $\pm 0.094$ | $\pm 0.065$ | $\pm 0.013$ | $\pm 0.035$ | $\pm 0.090$         | $\pm 0.064$         | $\pm 0.039$          | $\pm 0.038$          | $\pm 0.049$            | $\pm 0.045$            | $\pm 0.073$          | $\pm 0.033$          | $\pm 0.051$           | $\pm 0.074$           | $\pm 0.069$                  | $\pm 0.021$                  |
|               | BAcc     | 0.115       | 0.050       | 0.095       | 0.450       | 0.090       | 0.105               | 0.080               | 0.060                | 0.025                | 0.095                  | 0.030                  | 0.060                | <b>0.275</b>         | 0.150                 | 0.050                 | 0.160                        | 0.035                        |
|               |          | $\pm 0.105$ | $\pm 0.018$ | $\pm 0.021$ | $\pm 0.056$ | $\pm 0.029$ | $\pm 0.027$         | $\pm 0.041$         | $\pm 0.034$          | $\pm 0.031$          | $\pm 0.021$            | $\pm 0.021$            | $\pm 0.038$          | $\pm 0.047$          | $\pm 0.035$           | $\pm 0.018$           | $\pm 0.072$                  | $\pm 0.022$                  |
| Subject6_sync | Acc.1    | 0.115       | 0.050       | 0.095       | 0.450       | 0.090       | 0.122               | 0.116               | 0.075                | 0.025                | 0.078                  | 0.037                  | 0.056                | <b>0.275</b>         | 0.131                 | 0.050                 | 0.175                        | 0.022                        |
|               |          | $\pm 0.105$ | $\pm 0.018$ | $\pm 0.021$ | $\pm 0.056$ | $\pm 0.029$ | $\pm 0.066$         | $\pm 0.084$         | $\pm 0.060$          | $\pm 0.039$          | $\pm 0.037$            | $\pm 0.032$            | $\pm 0.053$          | $\pm 0.014$          | $\pm 0.053$           | $\pm 0.020$           | $\pm 0.074$                  | $\pm 0.014$                  |

Continued on next page



| Subject       | Metric   | DeepConvnet     | EEGNet          | Conformer       | CTNet                          | SSVEPDNN        | BIOT <sup>(i)</sup> | BIOT <sup>(i)</sup> | BENDR <sup>(i)</sup> | BENDR <sup>(i)</sup> | CBraMod <sup>(i)</sup> | CBraMod <sup>(i)</sup> | EEGPT <sup>(i)</sup> | EEGPT <sup>(i)</sup>           | LaBraM <sup>(i)</sup>          | LaBraM <sup>(i)</sup> | STEEGformer-s <sup>(i)</sup>   | STEEGformer-s <sup>(i)</sup> |
|---------------|----------|-----------------|-----------------|-----------------|--------------------------------|-----------------|---------------------|---------------------|----------------------|----------------------|------------------------|------------------------|----------------------|--------------------------------|--------------------------------|-----------------------|--------------------------------|------------------------------|
|               | Acc.2    | 0.180<br>±0.170 | 0.075<br>±0.040 | 0.170<br>±0.045 | 0.685<br>± 0.068               | 0.125<br>±0.064 | 0.206<br>±0.096     | 0.169<br>±0.088     | 0.116<br>±0.084      | 0.050<br>±0.034      | 0.128<br>±0.076        | 0.109<br>±0.071        | 0.150<br>±0.085      | <b>0.441</b><br>± <b>0.101</b> | 0.219<br>±0.109                | 0.091<br>±0.034       | 0.284<br>±0.110                | 0.047<br>±0.019              |
| Subject7_sync | $\kappa$ | 0.046<br>±0.049 | 0.010<br>±0.023 | 0.056<br>±0.028 | 0.082<br>±0.033                | 0.041<br>±0.034 | 0.041<br>±0.056     | 0.026<br>±0.048     | 0.005<br>±0.028      | 0.005<br>±0.033      | 0.031<br>±0.021        | 0.021<br>±0.028        | 0.056<br>±0.046      | 0.144<br>± 0.053               | <b>0.097</b><br>± <b>0.064</b> | 0.021<br>±0.028       | 0.072<br>±0.053                | 0.036<br>±0.029              |
|               | AUC      | 0.688<br>±0.017 | 0.624<br>±0.057 | 0.626<br>±0.054 | <b>0.770</b><br>± <b>0.030</b> | 0.649<br>±0.039 | 0.569<br>±0.052     | 0.595<br>±0.033     | 0.559<br>±0.053      | 0.523<br>±0.010      | 0.631<br>±0.021        | 0.616<br>±0.030        | 0.582<br>±0.063      | 0.799<br>± 0.037               | 0.626<br>±0.033                | 0.558<br>±0.061       | 0.621<br>±0.067                | 0.621<br>±0.051              |
|               | BAcc     | 0.070<br>±0.048 | 0.035<br>±0.022 | 0.080<br>±0.027 | 0.105<br>±0.033                | 0.065<br>±0.034 | 0.065<br>±0.055     | 0.050<br>±0.047     | 0.030<br>±0.027      | 0.030<br>±0.033      | 0.055<br>±0.021        | 0.045<br>±0.027        | 0.080<br>±0.045      | 0.165<br>± 0.052               | <b>0.120</b><br>± <b>0.062</b> | 0.045<br>±0.027       | 0.095<br>±0.051                | 0.060<br>±0.029              |
|               | Acc.1    | 0.070<br>±0.048 | 0.035<br>±0.022 | 0.080<br>±0.027 | <b>0.105</b><br>± <b>0.033</b> | 0.065<br>±0.034 | 0.097<br>±0.085     | 0.059<br>±0.051     | 0.028<br>±0.037      | 0.028<br>±0.039      | 0.053<br>±0.038        | 0.037<br>±0.034        | 0.078<br>±0.088      | 0.178<br>± 0.066               | 0.103<br>±0.056                | 0.037<br>±0.028       | 0.078<br>±0.047                | 0.056<br>±0.038              |
|               | Acc.2    | 0.105<br>±0.045 | 0.095<br>±0.060 | 0.120<br>±0.041 | 0.175<br>±0.040                | 0.120<br>±0.048 | 0.131<br>±0.066     | 0.122<br>±0.084     | 0.056<br>±0.059      | 0.044<br>±0.036      | 0.116<br>±0.026        | 0.087<br>±0.036        | 0.097<br>±0.091      | 0.328<br>± 0.094               | <b>0.212</b><br>± <b>0.024</b> | 0.069<br>±0.053       | 0.203<br>±0.071                | 0.084<br>±0.045              |
|               | $\kappa$ | 0.015<br>±0.039 | 0.005<br>±0.033 | 0.015<br>±0.023 | <b>0.185</b><br>± <b>0.066</b> | 0.031<br>±0.028 | 0.015<br>±0.029     | 0.010<br>±0.039     | 0.010<br>±0.023      | -0.015<br>±0.014     | 0.010<br>±0.039        | 0.005<br>±0.028        | 0.005<br>±0.028      | 0.221<br>± 0.056               | 0.056<br>±0.042                | 0.036<br>±0.029       | 0.026<br>±0.031                | 0.021<br>±0.033              |
| Subject8_sync | AUC      | 0.616<br>±0.025 | 0.555<br>±0.041 | 0.587<br>±0.018 | <b>0.810</b><br>± <b>0.023</b> | 0.579<br>±0.078 | 0.562<br>±0.059     | 0.569<br>±0.037     | 0.558<br>±0.052      | 0.549<br>±0.090      | 0.573<br>±0.045        | 0.540<br>±0.030        | 0.575<br>±0.063      | 0.824<br>± 0.016               | 0.544<br>±0.010                | 0.566<br>±0.054       | 0.539<br>±0.046                | 0.626<br>±0.024              |
|               | BAcc     | 0.040<br>±0.038 | 0.030<br>±0.033 | 0.040<br>±0.022 | <b>0.205</b><br>± <b>0.065</b> | 0.055<br>±0.027 | 0.040<br>±0.029     | 0.035<br>±0.038     | 0.035<br>±0.022      | 0.010<br>±0.014      | 0.035<br>±0.038        | 0.030<br>±0.027        | 0.030<br>±0.027      | 0.240<br>± 0.055               | 0.080<br>±0.041                | 0.060<br>±0.029       | 0.050<br>±0.031                | 0.045<br>±0.033              |
|               | Acc.1    | 0.040<br>±0.038 | 0.030<br>±0.033 | 0.040<br>±0.022 | <b>0.205</b><br>± <b>0.065</b> | 0.055<br>±0.027 | 0.053<br>±0.050     | 0.041<br>±0.059     | 0.050<br>±0.034      | 0.006<br>±0.009      | 0.031<br>±0.040        | 0.056<br>±0.055        | 0.028<br>±0.026      | 0.300<br>± 0.089               | 0.078<br>±0.043                | 0.075<br>±0.056       | 0.059<br>±0.053                | 0.037<br>±0.024              |
|               | Acc.2    | 0.085<br>±0.068 | 0.055<br>±0.041 | 0.075<br>±0.050 | <b>0.320</b><br>± <b>0.054</b> | 0.070<br>±0.033 | 0.091<br>±0.061     | 0.078<br>±0.101     | 0.106<br>±0.050      | 0.034<br>±0.030      | 0.094<br>±0.076        | 0.078<br>±0.063        | 0.037<br>±0.036      | 0.375<br>± 0.068               | 0.125<br>±0.047                | 0.087<br>±0.056       | 0.087<br>±0.048                | 0.069<br>±0.036              |
|               | $\kappa$ | 0.026<br>±0.048 | 0.005<br>±0.011 | 0.031<br>±0.028 | 0.113<br>± 0.074               | 0.072<br>±0.056 | 0.005<br>±0.021     | 0.031<br>±0.021     | 0.031<br>±0.042      | -0.005<br>±0.028     | 0.056<br>±0.084        | 0.005<br>±0.033        | 0.010<br>±0.029      | 0.062<br>±0.050                | 0.056<br>±0.028                | 0.026<br>±0.060       | <b>0.077</b><br>± <b>0.063</b> | 0.041<br>±0.014              |
|               | AUC      | 0.663<br>±0.029 | 0.644<br>±0.051 | 0.634<br>±0.012 | 0.733<br>± 0.017               | 0.659<br>±0.028 | 0.566<br>±0.056     | 0.548<br>±0.059     | 0.602<br>±0.081      | 0.543<br>±0.080      | 0.589<br>±0.041        | 0.506<br>±0.038        | 0.545<br>±0.043      | <b>0.706</b><br>± <b>0.041</b> | 0.622<br>±0.029                | 0.530<br>±0.045       | 0.638<br>±0.052                | 0.560<br>±0.024              |
| Subject9_sync | BAcc     | 0.050<br>±0.047 | 0.030<br>±0.011 | 0.055<br>±0.027 | 0.135<br>± 0.072               | 0.095<br>±0.054 | 0.030<br>±0.021     | 0.055<br>±0.021     | 0.055<br>±0.041      | 0.020<br>±0.027      | 0.080<br>±0.082        | 0.030<br>±0.033        | 0.035<br>±0.029      | 0.085<br>±0.049                | 0.080<br>±0.027                | 0.050<br>±0.059       | <b>0.100</b><br>± <b>0.061</b> | 0.065<br>±0.014              |
|               | Acc.1    | 0.050<br>±0.047 | 0.030<br>±0.011 | 0.055<br>±0.027 | 0.135<br>± 0.072               | 0.095<br>±0.054 | 0.037<br>±0.050     | 0.044<br>±0.013     | 0.044<br>±0.046      | 0.031<br>±0.043      | 0.097<br>±0.117        | 0.037<br>±0.045        | 0.041<br>±0.042      | <b>0.100</b><br>± <b>0.053</b> | 0.087<br>±0.034                | 0.050<br>±0.056       | <b>0.100</b><br>± <b>0.061</b> | 0.078<br>±0.043              |
|               | Acc.2    | 0.105<br>±0.069 | 0.070<br>±0.048 | 0.100<br>±0.035 | 0.200<br>± 0.079               | 0.140<br>±0.049 | 0.125<br>±0.076     | 0.078<br>±0.040     | 0.091<br>±0.047      | 0.084<br>±0.070      | 0.144<br>±0.107        | 0.059<br>±0.034        | 0.081<br>±0.039      | <b>0.191</b><br>± <b>0.034</b> | 0.119<br>±0.024                | 0.081<br>±0.059       | 0.163<br>±0.069                | 0.116<br>±0.044              |
|               | $\kappa$ | 0.026<br>±0.048 | 0.005<br>±0.011 | 0.031<br>±0.028 | 0.113<br>± 0.074               | 0.072<br>±0.056 | 0.005<br>±0.021     | 0.031<br>±0.021     | 0.031<br>±0.042      | -0.005<br>±0.028     | 0.056<br>±0.084        | 0.005<br>±0.033        | 0.010<br>±0.029      | 0.062<br>±0.050                | 0.056<br>±0.028                | 0.026<br>±0.060       | <b>0.077</b><br>± <b>0.063</b> | 0.041<br>±0.014              |
|               | AUC      | 0.663<br>±0.029 | 0.644<br>±0.051 | 0.634<br>±0.012 | 0.733<br>± 0.017               | 0.659<br>±0.028 | 0.566<br>±0.056     | 0.548<br>±0.059     | 0.602<br>±0.081      | 0.543<br>±0.080      | 0.589<br>±0.041        | 0.506<br>±0.038        | 0.545<br>±0.043      | <b>0.706</b><br>± <b>0.041</b> | 0.622<br>±0.029                | 0.530<br>±0.045       | 0.638<br>±0.052                | 0.560<br>±0.024              |
|               | BAcc     | 0.050<br>±0.047 | 0.030<br>±0.011 | 0.055<br>±0.027 | 0.135<br>± 0.072               | 0.095<br>±0.054 | 0.030<br>±0.021     | 0.055<br>±0.021     | 0.055<br>±0.041      | 0.020<br>±0.027      | 0.080<br>±0.082        | 0.030<br>±0.033        | 0.035<br>±0.029      | 0.085<br>±0.049                | 0.080<br>±0.027                | 0.050<br>±0.059       | <b>0.100</b><br>± <b>0.061</b> | 0.065<br>±0.014              |

## Per-Subject Zero-Shot Transfer

Table 57: Average Zero-Shot Transfer Performance Across All Subjects

| Model (Training strategy) | $\kappa$     | AUC          | BAcc         | Acc.1        | Acc.2        |
|---------------------------|--------------|--------------|--------------|--------------|--------------|
|                           | 0.008        | 0.547        | 0.033        | 0.033        | 0.064        |
| <b>DeepConvnet</b>        | $\pm 0.008$  | $\pm 0.022$  | $\pm 0.007$  | $\pm 0.007$  | $\pm 0.011$  |
|                           | 0.006        | 0.529        | 0.030        | 0.030        | 0.061        |
| <b>EEGNet</b>             | $\pm 0.003$  | $\pm 0.009$  | $\pm 0.003$  | $\pm 0.003$  | $\pm 0.004$  |
|                           | 0.009        | 0.537        | 0.033        | 0.033        | 0.066        |
| <b>Conformer</b>          | $\pm 0.004$  | $\pm 0.011$  | $\pm 0.004$  | $\pm 0.004$  | $\pm 0.005$  |
|                           | <b>0.014</b> | <b>0.567</b> | <b>0.039</b> | 0.039        | 0.075        |
| <b>CTNet</b>              | $\pm 0.012$  | $\pm 0.034$  | $\pm 0.012$  | $\pm 0.012$  | $\pm 0.020$  |
|                           | 0.007        | 0.529        | 0.032        | 0.032        | 0.062        |
| <b>SSVEPDNN</b>           | $\pm 0.003$  | $\pm 0.008$  | $\pm 0.003$  | $\pm 0.003$  | $\pm 0.004$  |
|                           | 0.008        | 0.526        | 0.033        | 0.035        | 0.066        |
| <b>BIOT (f)</b>           | $\pm 0.007$  | $\pm 0.016$  | $\pm 0.007$  | $\pm 0.012$  | $\pm 0.018$  |
|                           | 0.003        | 0.512        | 0.028        | 0.028        | 0.056        |
| <b>BIOT (l)</b>           | $\pm 0.004$  | $\pm 0.011$  | $\pm 0.004$  | $\pm 0.006$  | $\pm 0.010$  |
|                           | 0.007        | 0.523        | 0.032        | 0.032        | 0.061        |
| <b>BENDR (f)</b>          | $\pm 0.003$  | $\pm 0.008$  | $\pm 0.003$  | $\pm 0.004$  | $\pm 0.006$  |
|                           | 0.001        | 0.507        | 0.026        | 0.026        | 0.051        |
| <b>BENDR (l)</b>          | $\pm 0.003$  | $\pm 0.003$  | $\pm 0.002$  | $\pm 0.003$  | $\pm 0.004$  |
|                           | 0.010        | 0.537        | 0.034        | 0.038        | 0.071        |
| <b>CBraMod (f)</b>        | $\pm 0.005$  | $\pm 0.015$  | $\pm 0.005$  | $\pm 0.008$  | $\pm 0.012$  |
|                           | 0.009        | 0.548        | 0.034        | <b>0.041</b> | <b>0.078</b> |
| <b>CBraMod (l)</b>        | $\pm 0.007$  | $\pm 0.031$  | $\pm 0.007$  | $\pm 0.013$  | $\pm 0.019$  |
|                           | 0.004        | 0.517        | 0.029        | 0.029        | 0.058        |
| <b>EEGPT (f)</b>          | $\pm 0.003$  | $\pm 0.011$  | $\pm 0.003$  | $\pm 0.004$  | $\pm 0.007$  |
|                           | 0.020        | 0.599        | 0.045        | 0.047        | 0.088        |
| <b>EEGPT (l)</b>          | $\pm 0.010$  | $\pm 0.036$  | $\pm 0.010$  | $\pm 0.015$  | $\pm 0.024$  |
|                           | 0.010        | 0.530        | 0.035        | 0.036        | 0.068        |
| <b>LaBraM (f)</b>         | $\pm 0.008$  | $\pm 0.017$  | $\pm 0.008$  | $\pm 0.010$  | $\pm 0.017$  |
|                           | 0.001        | 0.508        | 0.026        | 0.028        | 0.054        |
| <b>LaBraM (l)</b>         | $\pm 0.002$  | $\pm 0.006$  | $\pm 0.002$  | $\pm 0.007$  | $\pm 0.011$  |
|                           | 0.006        | 0.524        | 0.031        | 0.034        | 0.066        |
| <b>STEEGformer-s (f)</b>  | $\pm 0.005$  | $\pm 0.012$  | $\pm 0.005$  | $\pm 0.011$  | $\pm 0.019$  |
|                           | 0.002        | 0.527        | 0.027        | 0.029        | 0.057        |
| <b>STEEGformer-s (l)</b>  | $\pm 0.002$  | $\pm 0.013$  | $\pm 0.002$  | $\pm 0.009$  | $\pm 0.015$  |

Table 58: Per-Subject Zero-Shot Transfer Performance

| Subject        | Metric   | DeepConvnet          | EEGNet               | Conformer            | CTNet                | SSVEPDNN                    | BIOT (f)             | BIOT (l)              | BENDR (f)            | BENDR (l)            | CBraMod (f)                 | CBraMod (l)                 | EEGPT (f)             | EEGPT (l)                   | LaBraM (f)                  | LaBraM (l)            | STEEGformer-s (f)    | STEEGformer-s (l)    |
|----------------|----------|----------------------|----------------------|----------------------|----------------------|-----------------------------|----------------------|-----------------------|----------------------|----------------------|-----------------------------|-----------------------------|-----------------------|-----------------------------|-----------------------------|-----------------------|----------------------|----------------------|
| Subject10_sync | $\kappa$ | 0.007<br>$\pm 0.014$ | 0.006<br>$\pm 0.015$ | 0.010<br>$\pm 0.015$ | 0.006<br>$\pm 0.014$ | <b>0.012</b><br>$\pm 0.016$ | 0.004<br>$\pm 0.012$ | -0.002<br>$\pm 0.011$ | 0.003<br>$\pm 0.014$ | 0.004<br>$\pm 0.012$ | 0.012<br>$\pm 0.013$        | 0.013<br>$\pm 0.013$        | 0.001<br>$\pm 0.011$  | <b>0.012</b><br>$\pm 0.017$ | 0.009<br>$\pm 0.015$        | 0.001<br>$\pm 0.013$  | 0.009<br>$\pm 0.013$ | 0.002<br>$\pm 0.015$ |
|                | AUC      | 0.548<br>$\pm 0.041$ | 0.532<br>$\pm 0.034$ | 0.544<br>$\pm 0.035$ | 0.536<br>$\pm 0.037$ | 0.529<br>$\pm 0.033$        | 0.517<br>$\pm 0.023$ | 0.506<br>$\pm 0.020$  | 0.511<br>$\pm 0.029$ | 0.507<br>$\pm 0.026$ | 0.539<br>$\pm 0.024$        | <b>0.560</b><br>$\pm 0.032$ | 0.505<br>$\pm 0.022$  | 0.576<br>$\pm 0.043$        | 0.540<br>$\pm 0.026$        | 0.505<br>$\pm 0.023$  | 0.525<br>$\pm 0.027$ | 0.536<br>$\pm 0.032$ |
|                | BAcc     | 0.032<br>$\pm 0.014$ | 0.031<br>$\pm 0.015$ | 0.035<br>$\pm 0.015$ | 0.031<br>$\pm 0.014$ | <b>0.037</b><br>$\pm 0.016$ | 0.029<br>$\pm 0.012$ | 0.023<br>$\pm 0.011$  | 0.028<br>$\pm 0.014$ | 0.029<br>$\pm 0.012$ | 0.037<br>$\pm 0.013$        | 0.038<br>$\pm 0.013$        | 0.026<br>$\pm 0.010$  | <b>0.037</b><br>$\pm 0.017$ | 0.034<br>$\pm 0.014$        | 0.026<br>$\pm 0.012$  | 0.034<br>$\pm 0.012$ | 0.027<br>$\pm 0.014$ |
|                | Acc.1    | 0.032<br>$\pm 0.014$ | 0.031<br>$\pm 0.015$ | 0.035<br>$\pm 0.015$ | 0.031<br>$\pm 0.014$ | 0.037<br>$\pm 0.016$        | 0.032<br>$\pm 0.015$ | 0.020<br>$\pm 0.012$  | 0.027<br>$\pm 0.015$ | 0.030<br>$\pm 0.013$ | 0.037<br>$\pm 0.016$        | 0.056<br>$\pm 0.028$        | 0.026<br>$\pm 0.013$  | 0.034<br>$\pm 0.018$        | <b>0.038</b><br>$\pm 0.017$ | 0.033<br>$\pm 0.018$  | 0.035<br>$\pm 0.019$ | 0.025<br>$\pm 0.014$ |
|                | Acc.2    | 0.064<br>$\pm 0.018$ | 0.061<br>$\pm 0.019$ | 0.066<br>$\pm 0.024$ | 0.060<br>$\pm 0.018$ | 0.067<br>$\pm 0.022$        | 0.059<br>$\pm 0.017$ | 0.046<br>$\pm 0.016$  | 0.052<br>$\pm 0.021$ | 0.052<br>$\pm 0.018$ | 0.069<br>$\pm 0.024$        | 0.096<br>$\pm 0.033$        | 0.047<br>$\pm 0.017$  | 0.067<br>$\pm 0.023$        | <b>0.072</b><br>$\pm 0.026$ | 0.062<br>$\pm 0.024$  | 0.063<br>$\pm 0.029$ | 0.051<br>$\pm 0.017$ |
| Subject11_sync | $\kappa$ | 0.008<br>$\pm 0.013$ | 0.005<br>$\pm 0.012$ | 0.006<br>$\pm 0.014$ | 0.003<br>$\pm 0.012$ | 0.005<br>$\pm 0.015$        | 0.003<br>$\pm 0.011$ | 0.004<br>$\pm 0.012$  | 0.006<br>$\pm 0.011$ | 0.001<br>$\pm 0.013$ | 0.014<br>$\pm 0.013$        | 0.006<br>$\pm 0.012$        | 0.004<br>$\pm 0.009$  | <b>0.008</b><br>$\pm 0.012$ | 0.003<br>$\pm 0.011$        | 0.001<br>$\pm 0.009$  | 0.001<br>$\pm 0.011$ | 0.001<br>$\pm 0.008$ |
|                | AUC      | 0.535<br>$\pm 0.041$ | 0.524<br>$\pm 0.041$ | 0.534<br>$\pm 0.038$ | 0.528<br>$\pm 0.043$ | 0.525<br>$\pm 0.034$        | 0.516<br>$\pm 0.020$ | 0.510<br>$\pm 0.019$  | 0.520<br>$\pm 0.031$ | 0.504<br>$\pm 0.022$ | <b>0.548</b><br>$\pm 0.023$ | 0.564<br>$\pm 0.028$        | 0.516<br>$\pm 0.020$  | 0.538<br>$\pm 0.026$        | 0.518<br>$\pm 0.018$        | 0.505<br>$\pm 0.019$  | 0.507<br>$\pm 0.017$ | 0.514<br>$\pm 0.023$ |
|                | BAcc     | 0.032<br>$\pm 0.012$ | 0.030<br>$\pm 0.012$ | 0.031<br>$\pm 0.014$ | 0.028<br>$\pm 0.012$ | 0.030<br>$\pm 0.015$        | 0.028<br>$\pm 0.010$ | 0.029<br>$\pm 0.012$  | 0.031<br>$\pm 0.010$ | 0.026<br>$\pm 0.013$ | 0.039<br>$\pm 0.013$        | 0.031<br>$\pm 0.012$        | 0.029<br>$\pm 0.009$  | <b>0.033</b><br>$\pm 0.012$ | 0.028<br>$\pm 0.011$        | 0.026<br>$\pm 0.009$  | 0.026<br>$\pm 0.011$ | 0.026<br>$\pm 0.008$ |
|                | Acc.1    | 0.032<br>$\pm 0.012$ | 0.030<br>$\pm 0.012$ | 0.031<br>$\pm 0.014$ | 0.028<br>$\pm 0.012$ | 0.030<br>$\pm 0.015$        | 0.031<br>$\pm 0.013$ | 0.028<br>$\pm 0.014$  | 0.029<br>$\pm 0.014$ | 0.024<br>$\pm 0.015$ | 0.040<br>$\pm 0.016$        | <b>0.033</b><br>$\pm 0.017$ | 0.026<br>$\pm 0.009$  | 0.028<br>$\pm 0.013$        | 0.030<br>$\pm 0.015$        | 0.031<br>$\pm 0.013$  | 0.029<br>$\pm 0.018$ | 0.026<br>$\pm 0.014$ |
|                | Acc.2    | 0.064<br>$\pm 0.022$ | 0.060<br>$\pm 0.020$ | 0.064<br>$\pm 0.022$ | 0.057<br>$\pm 0.017$ | 0.057<br>$\pm 0.016$        | 0.054<br>$\pm 0.018$ | 0.055<br>$\pm 0.017$  | 0.052<br>$\pm 0.017$ | 0.046<br>$\pm 0.020$ | 0.073<br>$\pm 0.022$        | <b>0.071</b><br>$\pm 0.022$ | 0.053<br>$\pm 0.016$  | 0.057<br>$\pm 0.019$        | 0.058<br>$\pm 0.020$        | 0.059<br>$\pm 0.019$  | 0.059<br>$\pm 0.019$ | 0.056<br>$\pm 0.018$ |
| Subject12_sync | $\kappa$ | 0.004<br>$\pm 0.012$ | 0.005<br>$\pm 0.015$ | 0.009<br>$\pm 0.014$ | 0.005<br>$\pm 0.012$ | 0.004<br>$\pm 0.010$        | 0.001<br>$\pm 0.011$ | 0.002<br>$\pm 0.013$  | 0.007<br>$\pm 0.014$ | 0.003<br>$\pm 0.012$ | 0.012<br>$\pm 0.014$        | <b>0.012</b><br>$\pm 0.012$ | -0.001<br>$\pm 0.008$ | 0.013<br>$\pm 0.014$        | 0.010<br>$\pm 0.014$        | -0.000<br>$\pm 0.010$ | 0.002<br>$\pm 0.009$ | 0.001<br>$\pm 0.010$ |
|                | AUC      | 0.535<br>$\pm 0.042$ | 0.531<br>$\pm 0.043$ | 0.541<br>$\pm 0.038$ | 0.530<br>$\pm 0.042$ | 0.527<br>$\pm 0.039$        | 0.511<br>$\pm 0.019$ | 0.500<br>$\pm 0.020$  | 0.516<br>$\pm 0.029$ | 0.502<br>$\pm 0.020$ | 0.542<br>$\pm 0.035$        | <b>0.550</b><br>$\pm 0.030$ | 0.505<br>$\pm 0.016$  | 0.559<br>$\pm 0.032$        | 0.524<br>$\pm 0.029$        | 0.500<br>$\pm 0.017$  | 0.518<br>$\pm 0.022$ | 0.503<br>$\pm 0.022$ |
|                | BAcc     | 0.029<br>$\pm 0.012$ | 0.030<br>$\pm 0.015$ | 0.034<br>$\pm 0.014$ | 0.030<br>$\pm 0.011$ | 0.029<br>$\pm 0.009$        | 0.026<br>$\pm 0.010$ | 0.027<br>$\pm 0.012$  | 0.031<br>$\pm 0.013$ | 0.028<br>$\pm 0.011$ | 0.037<br>$\pm 0.014$        | <b>0.037</b><br>$\pm 0.012$ | 0.024<br>$\pm 0.008$  | 0.038<br>$\pm 0.014$        | 0.035<br>$\pm 0.014$        | 0.025<br>$\pm 0.010$  | 0.027<br>$\pm 0.009$ | 0.026<br>$\pm 0.010$ |
|                | Acc.1    | 0.029<br>$\pm 0.012$ | 0.030<br>$\pm 0.015$ | 0.034<br>$\pm 0.014$ | 0.030<br>$\pm 0.011$ | 0.029<br>$\pm 0.009$        | 0.025<br>$\pm 0.014$ | 0.024<br>$\pm 0.012$  | 0.036<br>$\pm 0.018$ | 0.026<br>$\pm 0.013$ | <b>0.041</b><br>$\pm 0.023$ | 0.044<br>$\pm 0.017$        | 0.022<br>$\pm 0.009$  | 0.032<br>$\pm 0.013$        | 0.035<br>$\pm 0.019$        | 0.023<br>$\pm 0.011$  | 0.023<br>$\pm 0.013$ | 0.026<br>$\pm 0.016$ |
|                | Acc.2    | 0.059<br>$\pm 0.016$ | 0.060<br>$\pm 0.020$ | 0.064<br>$\pm 0.020$ | 0.059<br>$\pm 0.015$ | 0.060<br>$\pm 0.016$        | 0.053<br>$\pm 0.017$ | 0.045<br>$\pm 0.016$  | 0.065<br>$\pm 0.023$ | 0.052<br>$\pm 0.021$ | <b>0.078</b><br>$\pm 0.033$ | 0.082<br>$\pm 0.027$        | 0.049<br>$\pm 0.013$  | 0.065<br>$\pm 0.020$        | 0.064<br>$\pm 0.027$        | 0.047<br>$\pm 0.018$  | 0.047<br>$\pm 0.018$ | 0.054<br>$\pm 0.017$ |

Continued on next page

| Subject        | Metric   | DeepConvnet          | EEGNet               | Conformer                   | CTNet                       | SSVEPDNN             | BIOT (f)             | BIOT (l)              | BENDR (f)            | BENDR (l)             | CBraMod (f)                 | CBraMod (l)          | EEGPT (f)            | EEGPT (l)                   | LaBraM (f)           | LaBraM (l)            | STEEGformer-s (f)    | STEEGformer-s (l)    |
|----------------|----------|----------------------|----------------------|-----------------------------|-----------------------------|----------------------|----------------------|-----------------------|----------------------|-----------------------|-----------------------------|----------------------|----------------------|-----------------------------|----------------------|-----------------------|----------------------|----------------------|
| Subject13_sync | $\kappa$ | 0.009<br>$\pm 0.012$ | 0.007<br>$\pm 0.015$ | 0.006<br>$\pm 0.015$        | 0.015<br>$\pm 0.022$        | 0.005<br>$\pm 0.016$ | 0.007<br>$\pm 0.014$ | 0.003<br>$\pm 0.012$  | 0.008<br>$\pm 0.013$ | 0.006<br>$\pm 0.013$  | <b>0.017</b><br>$\pm 0.017$ | 0.002<br>$\pm 0.011$ | 0.004<br>$\pm 0.011$ | 0.041<br>$\pm 0.044$        | 0.008<br>$\pm 0.011$ | 0.004<br>$\pm 0.010$  | 0.013<br>$\pm 0.014$ | 0.002<br>$\pm 0.009$ |
|                | AUC      | 0.549<br>$\pm 0.035$ | 0.530<br>$\pm 0.035$ | 0.545<br>$\pm 0.033$        | <b>0.595</b><br>$\pm 0.077$ | 0.530<br>$\pm 0.034$ | 0.526<br>$\pm 0.027$ | 0.507<br>$\pm 0.020$  | 0.531<br>$\pm 0.033$ | 0.513<br>$\pm 0.025$  | 0.552<br>$\pm 0.032$        | 0.542<br>$\pm 0.027$ | 0.520<br>$\pm 0.024$ | 0.655<br>$\pm 0.092$        | 0.543<br>$\pm 0.033$ | 0.506<br>$\pm 0.024$  | 0.536<br>$\pm 0.028$ | 0.545<br>$\pm 0.036$ |
|                | BAcc     | 0.034<br>$\pm 0.012$ | 0.032<br>$\pm 0.015$ | 0.031<br>$\pm 0.015$        | 0.040<br>$\pm 0.021$        | 0.029<br>$\pm 0.016$ | 0.032<br>$\pm 0.014$ | 0.028<br>$\pm 0.011$  | 0.032<br>$\pm 0.013$ | 0.031<br>$\pm 0.013$  | <b>0.041</b><br>$\pm 0.016$ | 0.027<br>$\pm 0.010$ | 0.029<br>$\pm 0.011$ | 0.065<br>$\pm 0.043$        | 0.033<br>$\pm 0.011$ | 0.029<br>$\pm 0.010$  | 0.038<br>$\pm 0.013$ | 0.027<br>$\pm 0.009$ |
|                | Acc.1    | 0.034<br>$\pm 0.012$ | 0.032<br>$\pm 0.015$ | 0.031<br>$\pm 0.015$        | 0.040<br>$\pm 0.021$        | 0.029<br>$\pm 0.016$ | 0.027<br>$\pm 0.014$ | 0.023<br>$\pm 0.011$  | 0.034<br>$\pm 0.017$ | 0.030<br>$\pm 0.016$  | <b>0.060</b><br>$\pm 0.026$ | 0.028<br>$\pm 0.014$ | 0.028<br>$\pm 0.016$ | 0.070<br>$\pm 0.060$        | 0.023<br>$\pm 0.010$ | 0.020<br>$\pm 0.009$  | 0.049<br>$\pm 0.017$ | 0.020<br>$\pm 0.009$ |
|                | Acc.2    | 0.066<br>$\pm 0.019$ | 0.061<br>$\pm 0.018$ | 0.064<br>$\pm 0.023$        | 0.085<br>$\pm 0.043$        | 0.060<br>$\pm 0.019$ | 0.054<br>$\pm 0.018$ | 0.045<br>$\pm 0.016$  | 0.065<br>$\pm 0.029$ | 0.057<br>$\pm 0.019$  | <b>0.100</b><br>$\pm 0.040$ | 0.053<br>$\pm 0.017$ | 0.054<br>$\pm 0.020$ | 0.118<br>$\pm 0.083$        | 0.046<br>$\pm 0.019$ | 0.037<br>$\pm 0.009$  | 0.088<br>$\pm 0.027$ | 0.045<br>$\pm 0.018$ |
| Subject14_sync | $\kappa$ | 0.007<br>$\pm 0.016$ | 0.010<br>$\pm 0.013$ | 0.010<br>$\pm 0.015$        | <b>0.023</b><br>$\pm 0.036$ | 0.016<br>$\pm 0.015$ | 0.010<br>$\pm 0.014$ | 0.005<br>$\pm 0.011$  | 0.014<br>$\pm 0.014$ | 0.001<br>$\pm 0.011$  | 0.014<br>$\pm 0.014$        | 0.019<br>$\pm 0.017$ | 0.006<br>$\pm 0.013$ | 0.044<br>$\pm 0.038$        | 0.020<br>$\pm 0.020$ | 0.002<br>$\pm 0.010$  | 0.010<br>$\pm 0.013$ | 0.005<br>$\pm 0.012$ |
|                | AUC      | 0.558<br>$\pm 0.050$ | 0.540<br>$\pm 0.048$ | 0.556<br>$\pm 0.043$        | <b>0.607</b><br>$\pm 0.088$ | 0.545<br>$\pm 0.046$ | 0.534<br>$\pm 0.027$ | 0.514<br>$\pm 0.020$  | 0.534<br>$\pm 0.027$ | 0.509<br>$\pm 0.024$  | 0.549<br>$\pm 0.031$        | 0.578<br>$\pm 0.033$ | 0.526<br>$\pm 0.023$ | 0.658<br>$\pm 0.086$        | 0.545<br>$\pm 0.037$ | 0.516<br>$\pm 0.024$  | 0.533<br>$\pm 0.028$ | 0.545<br>$\pm 0.032$ |
|                | BAcc     | 0.032<br>$\pm 0.016$ | 0.035<br>$\pm 0.013$ | 0.035<br>$\pm 0.014$        | <b>0.048</b><br>$\pm 0.035$ | 0.040<br>$\pm 0.015$ | 0.034<br>$\pm 0.014$ | 0.029<br>$\pm 0.011$  | 0.039<br>$\pm 0.014$ | 0.026<br>$\pm 0.010$  | 0.038<br>$\pm 0.014$        | 0.043<br>$\pm 0.016$ | 0.031<br>$\pm 0.012$ | 0.068<br>$\pm 0.037$        | 0.045<br>$\pm 0.019$ | 0.027<br>$\pm 0.010$  | 0.035<br>$\pm 0.013$ | 0.030<br>$\pm 0.011$ |
|                | Acc.1    | 0.032<br>$\pm 0.016$ | 0.035<br>$\pm 0.013$ | 0.035<br>$\pm 0.014$        | 0.048<br>$\pm 0.035$        | 0.040<br>$\pm 0.015$ | 0.042<br>$\pm 0.025$ | 0.032<br>$\pm 0.016$  | 0.039<br>$\pm 0.020$ | 0.027<br>$\pm 0.017$  | 0.047<br>$\pm 0.015$        | 0.069<br>$\pm 0.027$ | 0.031<br>$\pm 0.017$ | <b>0.069</b><br>$\pm 0.042$ | 0.048<br>$\pm 0.026$ | 0.034<br>$\pm 0.016$  | 0.041<br>$\pm 0.019$ | 0.041<br>$\pm 0.020$ |
|                | Acc.2    | 0.066<br>$\pm 0.021$ | 0.063<br>$\pm 0.023$ | 0.074<br>$\pm 0.024$        | 0.092<br>$\pm 0.052$        | 0.071<br>$\pm 0.023$ | 0.077<br>$\pm 0.033$ | 0.065<br>$\pm 0.016$  | 0.070<br>$\pm 0.025$ | 0.052<br>$\pm 0.027$  | 0.090<br>$\pm 0.021$        | 0.124<br>$\pm 0.034$ | 0.060<br>$\pm 0.023$ | <b>0.121</b><br>$\pm 0.071$ | 0.091<br>$\pm 0.043$ | 0.066<br>$\pm 0.026$  | 0.078<br>$\pm 0.028$ | 0.080<br>$\pm 0.027$ |
| Subject15_sync | $\kappa$ | 0.009<br>$\pm 0.014$ | 0.008<br>$\pm 0.015$ | 0.007<br>$\pm 0.015$        | <b>0.010</b><br>$\pm 0.015$ | 0.006<br>$\pm 0.013$ | 0.008<br>$\pm 0.010$ | 0.002<br>$\pm 0.011$  | 0.008<br>$\pm 0.014$ | -0.000<br>$\pm 0.010$ | 0.003<br>$\pm 0.011$        | 0.006<br>$\pm 0.010$ | 0.003<br>$\pm 0.011$ | 0.024<br>$\pm 0.019$        | 0.001<br>$\pm 0.011$ | -0.000<br>$\pm 0.013$ | 0.002<br>$\pm 0.010$ | 0.004<br>$\pm 0.009$ |
|                | AUC      | 0.537<br>$\pm 0.043$ | 0.531<br>$\pm 0.041$ | 0.536<br>$\pm 0.033$        | <b>0.549</b><br>$\pm 0.050$ | 0.531<br>$\pm 0.047$ | 0.522<br>$\pm 0.024$ | 0.502<br>$\pm 0.018$  | 0.533<br>$\pm 0.032$ | 0.502<br>$\pm 0.024$  | 0.532<br>$\pm 0.023$        | 0.526<br>$\pm 0.021$ | 0.508<br>$\pm 0.020$ | 0.599<br>$\pm 0.057$        | 0.505<br>$\pm 0.019$ | 0.504<br>$\pm 0.017$  | 0.516<br>$\pm 0.025$ | 0.517<br>$\pm 0.018$ |
|                | BAcc     | 0.034<br>$\pm 0.014$ | 0.033<br>$\pm 0.014$ | 0.032<br>$\pm 0.014$        | <b>0.035</b><br>$\pm 0.014$ | 0.030<br>$\pm 0.013$ | 0.032<br>$\pm 0.010$ | 0.027<br>$\pm 0.011$  | 0.033<br>$\pm 0.014$ | 0.025<br>$\pm 0.010$  | 0.028<br>$\pm 0.011$        | 0.031<br>$\pm 0.009$ | 0.028<br>$\pm 0.011$ | 0.049<br>$\pm 0.018$        | 0.026<br>$\pm 0.011$ | 0.025<br>$\pm 0.013$  | 0.027<br>$\pm 0.010$ | 0.029<br>$\pm 0.008$ |
|                | Acc.1    | 0.034<br>$\pm 0.014$ | 0.033<br>$\pm 0.014$ | 0.032<br>$\pm 0.014$        | <b>0.035</b><br>$\pm 0.014$ | 0.030<br>$\pm 0.013$ | 0.031<br>$\pm 0.014$ | 0.027<br>$\pm 0.014$  | 0.030<br>$\pm 0.014$ | 0.023<br>$\pm 0.011$  | 0.030<br>$\pm 0.015$        | 0.032<br>$\pm 0.016$ | 0.028<br>$\pm 0.013$ | 0.044<br>$\pm 0.018$        | 0.030<br>$\pm 0.015$ | 0.024<br>$\pm 0.015$  | 0.023<br>$\pm 0.012$ | 0.024<br>$\pm 0.011$ |
|                | Acc.2    | 0.063<br>$\pm 0.017$ | 0.063<br>$\pm 0.023$ | <b>0.069</b><br>$\pm 0.022$ | 0.065<br>$\pm 0.021$        | 0.062<br>$\pm 0.018$ | 0.060<br>$\pm 0.025$ | 0.054<br>$\pm 0.023$  | 0.059<br>$\pm 0.027$ | 0.048<br>$\pm 0.018$  | 0.063<br>$\pm 0.022$        | 0.064<br>$\pm 0.025$ | 0.053<br>$\pm 0.020$ | 0.082<br>$\pm 0.023$        | 0.054<br>$\pm 0.022$ | 0.050<br>$\pm 0.018$  | 0.045<br>$\pm 0.019$ | 0.049<br>$\pm 0.016$ |
| Subject16_sync | $\kappa$ | 0.006<br>$\pm 0.014$ | 0.006<br>$\pm 0.014$ | 0.011<br>$\pm 0.013$        | 0.008<br>$\pm 0.012$        | 0.005<br>$\pm 0.012$ | 0.008<br>$\pm 0.015$ | -0.000<br>$\pm 0.012$ | 0.008<br>$\pm 0.016$ | 0.003<br>$\pm 0.009$  | <b>0.013</b><br>$\pm 0.013$ | 0.010<br>$\pm 0.015$ | 0.002<br>$\pm 0.012$ | 0.016<br>$\pm 0.016$        | 0.007<br>$\pm 0.012$ | 0.000<br>$\pm 0.011$  | 0.007<br>$\pm 0.012$ | 0.001<br>$\pm 0.011$ |

Continued on next page

| Subject        | Metric | DeepConvnet                    | EEGNet          | Conformer       | CTNet                          | SSVEPDNN        | BIOT (f)                       | BIOT (l)        | BENDR (f)       | BENDR (l)        | CBraMod (f)                    | CBraMod (l)                    | EEGPT (f)       | EEGPT (l)                      | LaBraM (f)       | LaBraM (l)       | STEEGformer-s (f) | STEEGformer-s (l) |
|----------------|--------|--------------------------------|-----------------|-----------------|--------------------------------|-----------------|--------------------------------|-----------------|-----------------|------------------|--------------------------------|--------------------------------|-----------------|--------------------------------|------------------|------------------|-------------------|-------------------|
| Subject17_sync | AUC    | 0.542<br>±0.042                | 0.528<br>±0.043 | 0.540<br>±0.038 | <b>0.560</b><br>± <b>0.053</b> | 0.538<br>±0.044 | 0.519<br>±0.021                | 0.503<br>±0.019 | 0.530<br>±0.030 | 0.502<br>±0.025  | 0.550<br>±0.032                | 0.556<br>±0.031                | 0.509<br>±0.022 | 0.596<br>± 0.050               | 0.528<br>±0.029  | 0.503<br>±0.024  | 0.523<br>±0.026   | 0.517<br>±0.021   |
|                |        | 0.031<br>±0.013                | 0.031<br>±0.014 | 0.036<br>±0.013 | 0.033<br>±0.011                | 0.030<br>±0.012 | 0.032<br>±0.015                | 0.025<br>±0.012 | 0.033<br>±0.016 | 0.028<br>±0.009  | <b>0.038</b><br>± <b>0.013</b> | 0.034<br>±0.014                | 0.027<br>±0.012 | 0.041<br>± 0.016               | 0.032<br>±0.011  | 0.025<br>±0.011  | 0.032<br>±0.012   | 0.026<br>±0.010   |
|                | BAcc   | 0.031<br>±0.013                | 0.031<br>±0.014 | 0.036<br>±0.013 | 0.033<br>±0.011                | 0.030<br>±0.012 | 0.033<br>±0.014                | 0.026<br>±0.017 | 0.031<br>±0.017 | 0.025<br>±0.011  | <b>0.039</b><br>± <b>0.018</b> | 0.038<br>±0.021                | 0.027<br>±0.012 | 0.041<br>± 0.018               | 0.034<br>±0.018  | 0.029<br>±0.015  | 0.039<br>±0.020   | 0.027<br>±0.018   |
|                |        | 0.062<br>±0.018                | 0.061<br>±0.020 | 0.069<br>±0.021 | 0.064<br>±0.019                | 0.065<br>±0.020 | 0.065<br>±0.024                | 0.049<br>±0.020 | 0.065<br>±0.028 | 0.050<br>±0.018  | 0.072<br>±0.030                | <b>0.076</b><br>± <b>0.030</b> | 0.054<br>±0.014 | 0.082<br>± 0.029               | 0.063<br>±0.028  | 0.060<br>±0.023  | 0.069<br>±0.025   | 0.049<br>±0.021   |
|                | Acc.1  | 0.006<br>±0.014                | 0.004<br>±0.014 | 0.005<br>±0.016 | <b>0.009</b><br>± <b>0.019</b> | 0.008<br>±0.015 | 0.008<br>±0.014                | 0.000<br>±0.010 | 0.003<br>±0.013 | 0.003<br>±0.013  | 0.006<br>±0.011                | 0.008<br>±0.015                | 0.005<br>±0.010 | 0.016<br>± 0.033               | 0.003<br>±0.013  | -0.001<br>±0.008 | -0.000<br>±0.011  | 0.000<br>±0.011   |
|                |        | 0.531<br>±0.048                | 0.525<br>±0.042 | 0.526<br>±0.038 | <b>0.565</b><br>± <b>0.058</b> | 0.529<br>±0.048 | 0.531<br>±0.027                | 0.518<br>±0.026 | 0.517<br>±0.028 | 0.503<br>±0.022  | 0.516<br>±0.029                | 0.538<br>±0.033                | 0.507<br>±0.022 | 0.577<br>± 0.089               | 0.526<br>±0.024  | 0.503<br>±0.024  | 0.517<br>±0.027   | 0.512<br>±0.019   |
|                | BAcc   | 0.031<br>±0.013                | 0.029<br>±0.014 | 0.030<br>±0.016 | <b>0.033</b><br>± <b>0.018</b> | 0.032<br>±0.015 | 0.033<br>±0.014                | 0.025<br>±0.010 | 0.028<br>±0.013 | 0.028<br>±0.013  | 0.031<br>±0.011                | 0.033<br>±0.014                | 0.030<br>±0.010 | 0.041<br>± 0.032               | 0.028<br>±0.013  | 0.024<br>±0.007  | 0.025<br>±0.011   | 0.025<br>±0.011   |
|                |        | 0.031<br>±0.013                | 0.029<br>±0.014 | 0.030<br>±0.016 | 0.033<br>±0.018                | 0.032<br>±0.015 | 0.030<br>±0.015                | 0.025<br>±0.011 | 0.027<br>±0.015 | 0.028<br>±0.016  | 0.030<br>±0.014                | <b>0.040</b><br>± <b>0.018</b> | 0.028<br>±0.012 | 0.040<br>± 0.031               | 0.034<br>±0.019  | 0.025<br>±0.011  | 0.029<br>±0.018   | 0.026<br>±0.015   |
|                | Acc.2  | 0.061<br>±0.022                | 0.056<br>±0.019 | 0.061<br>±0.021 | 0.069<br>±0.026                | 0.065<br>±0.023 | 0.057<br>±0.021                | 0.050<br>±0.018 | 0.052<br>±0.023 | 0.057<br>±0.020  | 0.051<br>±0.021                | <b>0.076</b><br>± <b>0.027</b> | 0.054<br>±0.018 | 0.081<br>± 0.061               | 0.067<br>±0.029  | 0.048<br>±0.016  | 0.062<br>±0.026   | 0.054<br>±0.025   |
|                | κ      | 0.011<br>±0.016                | 0.008<br>±0.015 | 0.005<br>±0.013 | 0.012<br>±0.020                | 0.012<br>±0.013 | <b>0.022</b><br>± <b>0.027</b> | 0.007<br>±0.014 | 0.008<br>±0.015 | -0.002<br>±0.010 | 0.019<br>±0.015                | 0.019<br>±0.017                | 0.003<br>±0.010 | 0.026<br>± 0.026               | 0.011<br>±0.013  | 0.003<br>±0.009  | 0.007<br>±0.010   | 0.001<br>±0.010   |
|                |        | 0.571<br>±0.050                | 0.537<br>±0.042 | 0.547<br>±0.042 | <b>0.597</b><br>± <b>0.065</b> | 0.531<br>±0.046 | 0.560<br>±0.039                | 0.526<br>±0.027 | 0.520<br>±0.031 | 0.503<br>±0.021  | 0.549<br>±0.032                | 0.595<br>±0.038                | 0.516<br>±0.020 | 0.637<br>± 0.055               | 0.535<br>±0.024  | 0.516<br>±0.021  | 0.526<br>±0.025   | 0.537<br>±0.026   |
| Subject18_sync | BAcc   | 0.035<br>±0.016                | 0.033<br>±0.015 | 0.030<br>±0.012 | 0.036<br>±0.020                | 0.036<br>±0.013 | <b>0.047</b><br>± <b>0.026</b> | 0.032<br>±0.013 | 0.033<br>±0.014 | 0.023<br>±0.009  | 0.044<br>±0.014                | 0.043<br>±0.016                | 0.028<br>±0.010 | 0.050<br>± 0.025               | 0.036<br>±0.013  | 0.028<br>±0.008  | 0.031<br>±0.009   | 0.026<br>±0.010   |
|                |        | 0.035<br>±0.016                | 0.033<br>±0.015 | 0.030<br>±0.012 | 0.036<br>±0.020                | 0.036<br>±0.013 | 0.054<br>±0.037                | 0.032<br>±0.017 | 0.033<br>±0.017 | 0.022<br>±0.012  | 0.055<br>±0.020                | 0.072<br>± 0.028               | 0.030<br>±0.012 | <b>0.063</b><br>± <b>0.035</b> | 0.045<br>±0.025  | 0.027<br>±0.013  | 0.037<br>±0.016   | 0.035<br>±0.016   |
|                | Acc.1  | 0.069<br>±0.023                | 0.066<br>±0.022 | 0.064<br>±0.023 | 0.078<br>±0.036                | 0.067<br>±0.018 | 0.092<br>±0.055                | 0.059<br>±0.023 | 0.064<br>±0.025 | 0.044<br>±0.016  | 0.092<br>±0.029                | 0.122<br>± 0.037               | 0.060<br>±0.018 | <b>0.114</b><br>± <b>0.047</b> | 0.088<br>±0.039  | 0.054<br>±0.018  | 0.067<br>±0.019   | 0.067<br>±0.021   |
|                |        | 0.007<br>± 0.009               | 0.004<br>±0.013 | 0.006<br>±0.016 | <b>0.006</b><br>± <b>0.012</b> | 0.005<br>±0.012 | 0.003<br>±0.009                | 0.002<br>±0.013 | 0.003<br>±0.013 | 0.002<br>±0.009  | 0.005<br>±0.011                | 0.004<br>±0.009                | 0.003<br>±0.011 | 0.001<br>±0.012                | 0.007<br>± 0.011 | -0.000<br>±0.007 | 0.004<br>±0.014   | 0.002<br>±0.009   |
|                | AUC    | <b>0.537</b><br>± <b>0.041</b> | 0.523<br>±0.053 | 0.531<br>±0.040 | 0.537<br>±0.035                | 0.522<br>±0.043 | 0.516<br>±0.020                | 0.507<br>±0.019 | 0.510<br>±0.030 | 0.506<br>±0.026  | 0.520<br>±0.027                | 0.520<br>±0.030                | 0.508<br>±0.021 | 0.545<br>± 0.045               | 0.510<br>±0.017  | 0.504<br>±0.020  | 0.516<br>±0.030   | 0.536<br>±0.031   |
|                |        |                                |                 |                 |                                |                 |                                |                 |                 |                  |                                |                                |                 |                                |                  |                  |                   |                   |

Continued on next page

| Subject        | Metric   | DeepConvnet | EEGNet      | Conformer   | CTNet       | SSVEPDNN    | BIOT (f)    | BIOT (l)    | BENDR (f)   | BENDR (l)   | CBraMod (f) | CBraMod (l) | EEGPT (f)   | EEGPT (l)   | LaBraM (f)  | LaBraM (l)  | STEEGformer-s (f) | STEEGformer-s (l) |
|----------------|----------|-------------|-------------|-------------|-------------|-------------|-------------|-------------|-------------|-------------|-------------|-------------|-------------|-------------|-------------|-------------|-------------------|-------------------|
|                | BAcc     | $\pm 0.008$ | $\pm 0.013$ | $\pm 0.016$ | $\pm 0.012$ | $\pm 0.012$ | $\pm 0.009$ | $\pm 0.012$ | $\pm 0.012$ | $\pm 0.009$ | $\pm 0.010$ | $\pm 0.009$ | $\pm 0.011$ | $\pm 0.011$ | $\pm 0.011$ | $\pm 0.007$ | $\pm 0.014$       | $\pm 0.009$       |
|                | Acc.1    | $\pm 0.008$ | $\pm 0.013$ | $\pm 0.016$ | $\pm 0.012$ | $\pm 0.012$ | $\pm 0.024$ | $\pm 0.021$ | $\pm 0.016$ | $\pm 0.012$ | $\pm 0.015$ | $\pm 0.016$ | $\pm 0.014$ | $\pm 0.019$ | $\pm 0.021$ | $\pm 0.016$ | $\pm 0.023$       | $\pm 0.021$       |
|                | Acc.2    | 0.061       | 0.058       | 0.061       | 0.060       | 0.060       | 0.099       | 0.074       | 0.052       | 0.050       | 0.057       | 0.072       | 0.060       | 0.078       | 0.078       | 0.074       | 0.108             | 0.088             |
|                |          | $\pm 0.017$ | $\pm 0.020$ | $\pm 0.025$ | $\pm 0.015$ | $\pm 0.015$ | $\pm 0.038$ | $\pm 0.024$ | $\pm 0.023$ | $\pm 0.019$ | $\pm 0.023$ | $\pm 0.024$ | $\pm 0.021$ | $\pm 0.025$ | $\pm 0.031$ | $\pm 0.024$ | $\pm 0.030$       | $\pm 0.032$       |
| Subject1_sync  | $\kappa$ | 0.009       | 0.004       | 0.009       | 0.006       | 0.001       | -0.000      | 0.001       | 0.004       | 0.002       | 0.012       | 0.013       | 0.005       | 0.014       | 0.011       | -0.000      | 0.006             | 0.003             |
|                | AUC      | $\pm 0.014$ | $\pm 0.015$ | $\pm 0.016$ | $\pm 0.013$ | $\pm 0.014$ | $\pm 0.010$ | $\pm 0.014$ | $\pm 0.013$ | $\pm 0.010$ | $\pm 0.015$ | $\pm 0.012$ | $\pm 0.010$ | $\pm 0.010$ | $\pm 0.008$ | $\pm 0.013$ | $\pm 0.010$       | $\pm 0.007$       |
|                |          | 0.548       | 0.521       | 0.525       | 0.551       | 0.514       | 0.509       | 0.512       | 0.505       | 0.511       | 0.537       | 0.564       | 0.504       | 0.529       | 0.507       | 0.520       | 0.528             | 0.528             |
|                | BAcc     | $\pm 0.052$ | $\pm 0.045$ | $\pm 0.040$ | $\pm 0.049$ | $\pm 0.041$ | $\pm 0.023$ | $\pm 0.016$ | $\pm 0.025$ | $\pm 0.020$ | $\pm 0.024$ | $\pm 0.026$ | $\pm 0.017$ | $\pm 0.017$ | $\pm 0.018$ | $\pm 0.033$ | $\pm 0.024$       | $\pm 0.027$       |
|                |          | 0.034       | 0.029       | 0.034       | 0.031       | 0.026       | 0.025       | 0.026       | 0.029       | 0.027       | 0.037       | 0.037       | 0.029       | 0.039       | 0.036       | 0.025       | 0.031             | 0.028             |
|                | Acc.1    | $\pm 0.013$ | $\pm 0.014$ | $\pm 0.015$ | $\pm 0.012$ | $\pm 0.014$ | $\pm 0.010$ | $\pm 0.014$ | $\pm 0.013$ | $\pm 0.010$ | $\pm 0.015$ | $\pm 0.012$ | $\pm 0.009$ | $\pm 0.010$ | $\pm 0.008$ | $\pm 0.013$ | $\pm 0.010$       | $\pm 0.007$       |
|                |          | 0.034       | 0.029       | 0.034       | 0.031       | 0.026       | 0.020       | 0.023       | 0.026       | 0.027       | 0.035       | 0.041       | 0.027       | 0.030       | 0.035       | 0.025       | 0.029             | 0.025             |
|                | Acc.2    | $\pm 0.013$ | $\pm 0.014$ | $\pm 0.015$ | $\pm 0.012$ | $\pm 0.014$ | $\pm 0.012$ | $\pm 0.014$ | $\pm 0.013$ | $\pm 0.014$ | $\pm 0.015$ | $\pm 0.017$ | $\pm 0.009$ | $\pm 0.010$ | $\pm 0.010$ | $\pm 0.016$ | $\pm 0.013$       | $\pm 0.016$       |
| Subject20_sync | $\kappa$ | 0.064       | 0.057       | 0.065       | 0.061       | 0.055       | 0.048       | 0.045       | 0.050       | 0.052       | 0.065       | 0.083       | 0.050       | 0.060       | 0.062       | 0.051       | 0.056             | 0.050             |
|                | AUC      | $\pm 0.022$ | $\pm 0.018$ | $\pm 0.022$ | $\pm 0.019$ | $\pm 0.014$ | $\pm 0.020$ | $\pm 0.015$ | $\pm 0.019$ | $\pm 0.013$ | $\pm 0.022$ | $\pm 0.019$ | $\pm 0.015$ | $\pm 0.020$ | $\pm 0.022$ | $\pm 0.020$ | $\pm 0.023$       | $\pm 0.021$       |
|                |          | 0.010       | 0.008       | 0.007       | 0.026       | 0.014       | 0.015       | 0.004       | 0.012       | -0.001      | 0.013       | 0.009       | 0.002       | 0.024       | 0.018       | 0.001       | 0.006             | 0.005             |
|                | BAcc     | $\pm 0.014$ | $\pm 0.016$ | $\pm 0.017$ | $\pm 0.034$ | $\pm 0.020$ | $\pm 0.019$ | $\pm 0.014$ | $\pm 0.020$ | $\pm 0.010$ | $\pm 0.016$ | $\pm 0.013$ | $\pm 0.017$ | $\pm 0.035$ | $\pm 0.018$ | $\pm 0.010$ | $\pm 0.012$       | $\pm 0.010$       |
|                |          | 0.555       | 0.540       | 0.539       | 0.605       | 0.548       | 0.549       | 0.517       | 0.534       | 0.507       | 0.544       | 0.553       | 0.518       | 0.626       | 0.536       | 0.511       | 0.525             | 0.548             |
|                | Acc.1    | $\pm 0.049$ | $\pm 0.052$ | $\pm 0.038$ | $\pm 0.084$ | $\pm 0.057$ | $\pm 0.034$ | $\pm 0.022$ | $\pm 0.030$ | $\pm 0.020$ | $\pm 0.034$ | $\pm 0.039$ | $\pm 0.025$ | $\pm 0.081$ | $\pm 0.035$ | $\pm 0.021$ | $\pm 0.030$       | $\pm 0.033$       |
|                |          | 0.035       | 0.033       | 0.032       | 0.050       | 0.039       | 0.040       | 0.029       | 0.037       | 0.024       | 0.037       | 0.034       | 0.027       | 0.048       | 0.043       | 0.026       | 0.031             | 0.030             |
|                | Acc.2    | $\pm 0.014$ | $\pm 0.016$ | $\pm 0.016$ | $\pm 0.033$ | $\pm 0.019$ | $\pm 0.018$ | $\pm 0.014$ | $\pm 0.019$ | $\pm 0.010$ | $\pm 0.016$ | $\pm 0.012$ | $\pm 0.016$ | $\pm 0.034$ | $\pm 0.018$ | $\pm 0.010$ | $\pm 0.012$       | $\pm 0.009$       |
| Subject21_sync | $\kappa$ | 0.035       | 0.033       | 0.032       | 0.050       | 0.039       | 0.067       | 0.042       | 0.038       | 0.024       | 0.051       | 0.050       | 0.038       | 0.081       | 0.062       | 0.037       | 0.050             | 0.050             |
|                | AUC      | $\pm 0.014$ | $\pm 0.016$ | $\pm 0.016$ | $\pm 0.033$ | $\pm 0.019$ | $\pm 0.032$ | $\pm 0.024$ | $\pm 0.023$ | $\pm 0.014$ | $\pm 0.023$ | $\pm 0.023$ | $\pm 0.025$ | $\pm 0.057$ | $\pm 0.035$ | $\pm 0.019$ | $\pm 0.024$       | $\pm 0.019$       |
|                |          | 0.064       | 0.066       | 0.064       | 0.093       | 0.069       | 0.114       | 0.081       | 0.073       | 0.049       | 0.088       | 0.098       | 0.075       | 0.150       | 0.112       | 0.074       | 0.094             | 0.095             |
|                | BAcc     | $\pm 0.022$ | $\pm 0.021$ | $\pm 0.022$ | $\pm 0.052$ | $\pm 0.030$ | $\pm 0.038$ | $\pm 0.035$ | $\pm 0.033$ | $\pm 0.020$ | $\pm 0.031$ | $\pm 0.028$ | $\pm 0.028$ | $\pm 0.072$ | $\pm 0.063$ | $\pm 0.029$ | $\pm 0.039$       | $\pm 0.028$       |
|                |          | 0.007       | 0.004       | 0.007       | 0.026       | 0.006       | 0.007       | 0.004       | 0.002       | -0.000      | 0.006       | -0.003      | 0.003       | 0.028       | 0.000       | 0.001       | 0.010             | 0.005             |
|                | Acc.1    | $\pm 0.010$ | $\pm 0.013$ | $\pm 0.015$ | $\pm 0.025$ | $\pm 0.014$ | $\pm 0.012$ | $\pm 0.012$ | $\pm 0.015$ | $\pm 0.011$ | $\pm 0.016$ | $\pm 0.008$ | $\pm 0.011$ | $\pm 0.028$ | $\pm 0.007$ | $\pm 0.005$ | $\pm 0.012$       | $\pm 0.008$       |
|                |          | 0.546       | 0.524       | 0.540       | 0.605       | 0.523       | 0.526       | 0.516       | 0.519       | 0.512       | 0.522       | 0.499       | 0.512       | 0.619       | 0.504       | 0.498       | 0.536             | 0.536             |
|                | Acc.2    | $\pm 0.044$ | $\pm 0.038$ | $\pm 0.036$ | $\pm 0.079$ | $\pm 0.043$ | $\pm 0.026$ | $\pm 0.023$ | $\pm 0.030$ | $\pm 0.019$ | $\pm 0.027$ | $\pm 0.027$ | $\pm 0.022$ | $\pm 0.083$ | $\pm 0.019$ | $\pm 0.023$ | $\pm 0.025$       | $\pm 0.032$       |
|                | AUC      | 0.032       | 0.029       | 0.032       | 0.050       | 0.031       | 0.032       | 0.029       | 0.027       | 0.025       | 0.031       | 0.022       | 0.028       | 0.053       | 0.025       | 0.026       | 0.035             | 0.030             |
|                |          | $\pm 0.010$ | $\pm 0.013$ | $\pm 0.015$ | $\pm 0.025$ | $\pm 0.014$ | $\pm 0.012$ | $\pm 0.011$ | $\pm 0.015$ | $\pm 0.011$ | $\pm 0.016$ | $\pm 0.007$ | $\pm 0.011$ | $\pm 0.028$ | $\pm 0.006$ | $\pm 0.005$ | $\pm 0.011$       | $\pm 0.008$       |

Continued on next page

| Subject        | Metric   | DeepConvnet     | EEGNet          | Conformer       | CTNet                          | SSVEPDNN        | BIOT (f)                       | BIOT (l)        | BENDR (f)       | BENDR (l)        | CBraMod (f)     | CBraMod (l)                    | EEGPT (f)       | EEGPT (l)                      | LaBraM (f)                     | LaBraM (l)       | STEEGformer-s (f) | STEEGformer-s (l) |
|----------------|----------|-----------------|-----------------|-----------------|--------------------------------|-----------------|--------------------------------|-----------------|-----------------|------------------|-----------------|--------------------------------|-----------------|--------------------------------|--------------------------------|------------------|-------------------|-------------------|
| Subject22_sync | Acc.1    | 0.032<br>±0.010 | 0.029<br>±0.013 | 0.032<br>±0.015 | <b>0.050</b><br>± <b>0.025</b> | 0.031<br>±0.014 | 0.032<br>±0.018                | 0.033<br>±0.021 | 0.025<br>±0.014 | 0.023<br>±0.012  | 0.029<br>±0.018 | 0.027<br>±0.011                | 0.025<br>±0.013 | 0.059<br>± 0.032               | 0.017<br>±0.005                | 0.017<br>±0.005  | 0.038<br>±0.016   | 0.038<br>±0.017   |
|                |          | 0.062<br>±0.019 | 0.060<br>±0.019 | 0.063<br>±0.020 | <b>0.098</b><br>± <b>0.042</b> | 0.057<br>±0.017 | 0.059<br>±0.027                | 0.061<br>±0.029 | 0.055<br>±0.019 | 0.049<br>±0.020  | 0.058<br>±0.021 | 0.060<br>±0.016                | 0.057<br>±0.019 | 0.110<br>± 0.057               | 0.035<br>±0.007                | 0.033<br>±0.009  | 0.070<br>±0.022   | 0.061<br>±0.020   |
|                | $\kappa$ | 0.010<br>±0.016 | 0.004<br>±0.015 | 0.007<br>±0.013 | 0.035<br>± 0.040               | 0.007<br>±0.018 | 0.019<br>±0.022                | 0.007<br>±0.013 | 0.006<br>±0.015 | 0.004<br>±0.013  | 0.008<br>±0.017 | 0.010<br>±0.013                | 0.006<br>±0.013 | <b>0.026</b><br>± <b>0.038</b> | 0.011<br>±0.019                | 0.001<br>±0.012  | 0.007<br>±0.010   | 0.004<br>±0.011   |
|                |          | 0.542<br>±0.041 | 0.522<br>±0.043 | 0.538<br>±0.039 | 0.626<br>± 0.095               | 0.532<br>±0.038 | 0.555<br>±0.041                | 0.538<br>±0.040 | 0.532<br>±0.028 | 0.504<br>±0.022  | 0.522<br>±0.027 | 0.537<br>±0.039                | 0.520<br>±0.026 | <b>0.605</b><br>± <b>0.089</b> | 0.544<br>±0.035                | 0.517<br>±0.031  | 0.529<br>±0.030   | 0.545<br>±0.033   |
|                | BAcc     | 0.035<br>±0.015 | 0.029<br>±0.014 | 0.032<br>±0.013 | 0.059<br>± 0.039               | 0.032<br>±0.018 | 0.044<br>±0.021                | 0.031<br>±0.013 | 0.031<br>±0.015 | 0.029<br>±0.012  | 0.033<br>±0.016 | 0.034<br>±0.013                | 0.031<br>±0.013 | <b>0.050</b><br>± <b>0.037</b> | 0.035<br>±0.019                | 0.026<br>±0.012  | 0.032<br>±0.010   | 0.029<br>±0.010   |
|                |          | 0.035<br>±0.015 | 0.029<br>±0.014 | 0.032<br>±0.013 | 0.059<br>± 0.039               | 0.032<br>±0.018 | <b>0.048</b><br>± <b>0.029</b> | 0.032<br>±0.020 | 0.034<br>±0.020 | 0.030<br>±0.013  | 0.040<br>±0.021 | 0.043<br>±0.020                | 0.031<br>±0.017 | 0.045<br>±0.034                | 0.032<br>±0.024                | 0.022<br>±0.011  | 0.027<br>±0.012   | 0.026<br>±0.017   |
| Subject23_sync | Acc.1    | 0.065<br>±0.020 | 0.055<br>±0.019 | 0.067<br>±0.021 | 0.108<br>± 0.067               | 0.063<br>±0.021 | <b>0.089</b><br>± <b>0.042</b> | 0.065<br>±0.036 | 0.066<br>±0.029 | 0.054<br>±0.019  | 0.075<br>±0.026 | 0.082<br>±0.033                | 0.061<br>±0.027 | 0.088<br>±0.060                | 0.064<br>±0.034                | 0.050<br>±0.020  | 0.050<br>±0.017   | 0.052<br>±0.027   |
|                |          | 0.009<br>±0.015 | 0.003<br>±0.014 | 0.010<br>±0.018 | 0.005<br>±0.012                | 0.008<br>±0.013 | 0.000<br>±0.010                | 0.003<br>±0.010 | 0.009<br>±0.016 | -0.003<br>±0.010 | 0.008<br>±0.013 | 0.010<br>±0.012                | 0.002<br>±0.014 | 0.014<br>± 0.017               | <b>0.010</b><br>± <b>0.013</b> | 0.003<br>±0.013  | 0.010<br>±0.013   | 0.004<br>±0.010   |
|                | AUC      | 0.540<br>±0.042 | 0.528<br>±0.043 | 0.536<br>±0.037 | 0.536<br>±0.042                | 0.531<br>±0.040 | 0.510<br>±0.019                | 0.505<br>±0.017 | 0.527<br>±0.029 | 0.506<br>±0.024  | 0.539<br>±0.028 | <b>0.557</b><br>± <b>0.038</b> | 0.504<br>±0.022 | 0.580<br>± 0.048               | 0.538<br>±0.029                | 0.502<br>±0.020  | 0.527<br>±0.026   | 0.521<br>±0.026   |
|                |          | 0.034<br>±0.014 | 0.028<br>±0.014 | 0.035<br>±0.017 | 0.030<br>±0.012                | 0.033<br>±0.013 | 0.025<br>±0.010                | 0.028<br>±0.009 | 0.034<br>±0.016 | 0.022<br>±0.010  | 0.033<br>±0.013 | 0.034<br>±0.012                | 0.027<br>±0.014 | 0.039<br>± 0.017               | <b>0.035</b><br>± <b>0.013</b> | 0.028<br>±0.012  | 0.034<br>±0.013   | 0.029<br>±0.010   |
|                | Acc.2    | 0.034<br>±0.014 | 0.028<br>±0.014 | 0.035<br>±0.017 | 0.030<br>±0.012                | 0.033<br>±0.013 | 0.026<br>±0.016                | 0.027<br>±0.013 | 0.037<br>±0.017 | 0.023<br>±0.012  | 0.039<br>±0.019 | <b>0.039</b><br>± <b>0.018</b> | 0.029<br>±0.019 | 0.040<br>± 0.018               | 0.033<br>±0.015                | 0.028<br>±0.019  | 0.027<br>±0.011   | 0.022<br>±0.012   |
|                |          | 0.061<br>±0.020 | 0.058<br>±0.019 | 0.065<br>±0.023 | 0.061<br>±0.020                | 0.059<br>±0.020 | 0.049<br>±0.018                | 0.050<br>±0.018 | 0.070<br>±0.027 | 0.050<br>±0.019  | 0.073<br>±0.031 | 0.081<br>± 0.032               | 0.053<br>±0.020 | <b>0.078</b><br>± <b>0.030</b> | 0.061<br>±0.019                | 0.055<br>±0.023  | 0.051<br>±0.016   | 0.041<br>±0.013   |
| Subject24_sync | $\kappa$ | 0.008<br>±0.013 | 0.006<br>±0.014 | 0.008<br>±0.014 | 0.011<br>±0.018                | 0.010<br>±0.013 | 0.011<br>±0.017                | 0.006<br>±0.013 | 0.009<br>±0.012 | -0.002<br>±0.013 | 0.012<br>±0.011 | <b>0.017</b><br>± <b>0.018</b> | 0.005<br>±0.014 | 0.026<br>± 0.017               | 0.016<br>±0.018                | -0.001<br>±0.012 | 0.007<br>±0.013   | 0.005<br>±0.011   |
|                |          | 0.545<br>±0.043 | 0.528<br>±0.037 | 0.535<br>±0.031 | 0.553<br>±0.038                | 0.534<br>±0.041 | 0.528<br>±0.027                | 0.517<br>±0.021 | 0.521<br>±0.034 | 0.504<br>±0.021  | 0.545<br>±0.024 | <b>0.572</b><br>± <b>0.028</b> | 0.519<br>±0.025 | 0.634<br>± 0.056               | 0.537<br>±0.029                | 0.504<br>±0.021  | 0.521<br>±0.024   | 0.535<br>±0.024   |
|                | BAcc     | 0.032<br>±0.012 | 0.031<br>±0.013 | 0.033<br>±0.014 | 0.035<br>±0.018                | 0.035<br>±0.013 | 0.036<br>±0.016                | 0.031<br>±0.013 | 0.034<br>±0.011 | 0.023<br>±0.012  | 0.036<br>±0.011 | <b>0.042</b><br>± <b>0.017</b> | 0.030<br>±0.013 | 0.050<br>± 0.017               | 0.041<br>±0.017                | 0.024<br>±0.011  | 0.032<br>±0.012   | 0.029<br>±0.011   |
|                |          | 0.032<br>±0.012 | 0.031<br>±0.013 | 0.033<br>±0.014 | 0.035<br>±0.018                | 0.035<br>±0.013 | 0.035<br>±0.024                | 0.038<br>±0.018 | 0.037<br>±0.016 | 0.026<br>±0.016  | 0.045<br>±0.019 | 0.074<br>± 0.034               | 0.030<br>±0.016 | 0.055<br>±0.022                | <b>0.059</b><br>± <b>0.032</b> | 0.030<br>±0.014  | 0.054<br>±0.018   | 0.046<br>±0.019   |
|                | Acc.1    | 0.032<br>±0.012 | 0.031<br>±0.013 | 0.033<br>±0.014 | 0.035<br>±0.018                | 0.035<br>±0.013 | 0.035<br>±0.024                | 0.038<br>±0.018 | 0.037<br>±0.016 | 0.026<br>±0.016  | 0.045<br>±0.019 | 0.074<br>± 0.034               | 0.030<br>±0.016 | 0.055<br>±0.022                | <b>0.059</b><br>± <b>0.032</b> | 0.030<br>±0.014  | 0.054<br>±0.018   | 0.046<br>±0.019   |
|                |          | 0.032<br>±0.012 | 0.031<br>±0.013 | 0.033<br>±0.014 | 0.035<br>±0.018                | 0.035<br>±0.013 | 0.035<br>±0.024                | 0.038<br>±0.018 | 0.037<br>±0.016 | 0.026<br>±0.016  | 0.045<br>±0.019 | 0.074<br>± 0.034               | 0.030<br>±0.016 | 0.055<br>±0.022                | <b>0.059</b><br>± <b>0.032</b> | 0.030<br>±0.014  | 0.054<br>±0.018   | 0.046<br>±0.019   |

Continued on next page

| Subject        | Metric   | DeepConvnet     | EEGNet           | Conformer       | CTNet                          | SSVEPDNN                       | BIOT (f)        | BIOT (l)         | BENDR (f)                      | BENDR (l)       | CBraMod (f)                    | CBraMod (l)                    | EEGPT (f)       | EEGPT (l)                      | LaBraM (f)      | LaBraM (l)       | STEEGformer-s (f) | STEEGformer-s (l) |
|----------------|----------|-----------------|------------------|-----------------|--------------------------------|--------------------------------|-----------------|------------------|--------------------------------|-----------------|--------------------------------|--------------------------------|-----------------|--------------------------------|-----------------|------------------|-------------------|-------------------|
|                | Acc.2    | 0.065<br>±0.018 | 0.063<br>±0.019  | 0.064<br>±0.021 | 0.071<br>±0.022                | 0.064<br>±0.020                | 0.089<br>±0.030 | 0.069<br>±0.026  | 0.072<br>±0.026                | 0.053<br>±0.018 | 0.081<br>±0.028                | 0.125<br>± 0.052               | 0.060<br>±0.023 | <b>0.110</b><br>± <b>0.039</b> | 0.099<br>±0.048 | 0.063<br>±0.023  | 0.103<br>±0.028   | 0.085<br>±0.026   |
| Subject25_sync | $\kappa$ | 0.001<br>±0.009 | -0.004<br>±0.010 | 0.002<br>±0.013 | 0.002<br>±0.009                | 0.008<br>±0.014                | 0.004<br>±0.011 | 0.002<br>±0.013  | 0.004<br>±0.010                | 0.002<br>±0.010 | <b>0.014</b><br>± <b>0.011</b> | 0.023<br>± 0.018               | 0.011<br>±0.012 | 0.010<br>±0.012                | 0.007<br>±0.013 | 0.000<br>±0.010  | 0.002<br>±0.010   | 0.001<br>±0.008   |
|                | AUC      | 0.516<br>±0.022 | 0.510<br>±0.024  | 0.506<br>±0.023 | 0.512<br>±0.020                | 0.518<br>±0.024                | 0.511<br>±0.020 | 0.506<br>±0.021  | 0.511<br>±0.023                | 0.508<br>±0.022 | 0.548<br>±0.031                | <b>0.592</b><br>± <b>0.039</b> | 0.546<br>±0.027 | 0.609<br>± 0.033               | 0.531<br>±0.024 | 0.513<br>±0.023  | 0.505<br>±0.020   | 0.518<br>±0.025   |
|                | BAcc     | 0.026<br>±0.009 | 0.021<br>±0.009  | 0.027<br>±0.013 | 0.027<br>±0.009                | 0.033<br>±0.014                | 0.029<br>±0.010 | 0.027<br>±0.013  | 0.029<br>±0.009                | 0.027<br>±0.010 | <b>0.039</b><br>± <b>0.011</b> | 0.048<br>± 0.017               | 0.035<br>±0.012 | 0.035<br>±0.012                | 0.032<br>±0.013 | 0.025<br>±0.010  | 0.027<br>±0.010   | 0.026<br>±0.007   |
|                | Acc.1    | 0.026<br>±0.009 | 0.021<br>±0.009  | 0.027<br>±0.013 | 0.027<br>±0.009                | <b>0.033</b><br>± <b>0.014</b> | 0.022<br>±0.011 | 0.023<br>±0.012  | 0.029<br>±0.015                | 0.024<br>±0.011 | 0.032<br>±0.012                | 0.045<br>± 0.022               | 0.029<br>±0.014 | 0.029<br>±0.013                | 0.027<br>±0.015 | 0.017<br>±0.008  | 0.020<br>±0.013   | 0.018<br>±0.007   |
|                | Acc.2    | 0.051<br>±0.010 | 0.050<br>±0.013  | 0.055<br>±0.016 | 0.052<br>±0.010                | 0.062<br>±0.017                | 0.049<br>±0.017 | 0.045<br>±0.015  | 0.054<br>±0.016                | 0.045<br>±0.018 | <b>0.065</b><br>± <b>0.018</b> | 0.088<br>± 0.033               | 0.059<br>±0.022 | 0.063<br>±0.021                | 0.055<br>±0.021 | 0.032<br>±0.010  | 0.040<br>±0.013   | 0.038<br>±0.011   |
|                |          |                 |                  |                 |                                |                                |                 |                  |                                |                 |                                |                                |                 |                                |                 |                  |                   |                   |
| Subject26_sync | $\kappa$ | 0.004<br>±0.013 | 0.010<br>±0.015  | 0.008<br>±0.010 | 0.021<br>± 0.025               | 0.007<br>±0.014                | 0.002<br>±0.011 | -0.000<br>±0.011 | 0.008<br>±0.015                | 0.001<br>±0.013 | 0.009<br>±0.017                | 0.016<br>±0.015                | 0.001<br>±0.009 | <b>0.018</b><br>± <b>0.019</b> | 0.010<br>±0.015 | 0.002<br>±0.009  | 0.005<br>±0.010   | 0.003<br>±0.010   |
|                | AUC      | 0.555<br>±0.047 | 0.545<br>±0.046  | 0.540<br>±0.038 | <b>0.592</b><br>± <b>0.065</b> | 0.530<br>±0.038                | 0.520<br>±0.025 | 0.517<br>±0.021  | 0.524<br>±0.032                | 0.505<br>±0.027 | 0.538<br>±0.025                | 0.582<br>±0.033                | 0.513<br>±0.024 | 0.611<br>± 0.058               | 0.535<br>±0.032 | 0.505<br>±0.022  | 0.531<br>±0.024   | 0.528<br>±0.025   |
|                | BAcc     | 0.029<br>±0.013 | 0.035<br>±0.015  | 0.033<br>±0.010 | 0.045<br>± 0.025               | 0.032<br>±0.014                | 0.026<br>±0.011 | 0.025<br>±0.011  | 0.033<br>±0.014                | 0.026<br>±0.013 | 0.034<br>±0.016                | 0.041<br>±0.015                | 0.026<br>±0.009 | <b>0.043</b><br>± <b>0.019</b> | 0.035<br>±0.015 | 0.027<br>±0.008  | 0.030<br>±0.009   | 0.028<br>±0.010   |
|                | Acc.1    | 0.029<br>±0.013 | 0.035<br>±0.015  | 0.033<br>±0.010 | <b>0.045</b><br>± <b>0.025</b> | 0.032<br>±0.014                | 0.019<br>±0.010 | 0.019<br>±0.012  | 0.031<br>±0.019                | 0.026<br>±0.017 | 0.035<br>±0.018                | 0.043<br>±0.017                | 0.031<br>±0.017 | 0.050<br>± 0.023               | 0.029<br>±0.016 | 0.026<br>±0.013  | 0.022<br>±0.007   | 0.021<br>±0.011   |
|                | Acc.2    | 0.060<br>±0.018 | 0.066<br>±0.021  | 0.065<br>±0.018 | <b>0.083</b><br>± <b>0.036</b> | 0.062<br>±0.020                | 0.041<br>±0.017 | 0.049<br>±0.021  | 0.066<br>±0.030                | 0.054<br>±0.021 | 0.067<br>±0.025                | 0.080<br>±0.024                | 0.059<br>±0.021 | 0.090<br>± 0.030               | 0.063<br>±0.023 | 0.051<br>±0.018  | 0.044<br>±0.014   | 0.043<br>±0.016   |
|                |          |                 |                  |                 |                                |                                |                 |                  |                                |                 |                                |                                |                 |                                |                 |                  |                   |                   |
| Subject27_sync | $\kappa$ | 0.003<br>±0.012 | 0.005<br>±0.015  | 0.010<br>±0.014 | 0.008<br>±0.014                | 0.007<br>±0.013                | 0.006<br>±0.010 | 0.002<br>±0.013  | 0.009<br>±0.014                | 0.001<br>±0.010 | 0.013<br>±0.015                | <b>0.014</b><br>± <b>0.012</b> | 0.002<br>±0.012 | 0.018<br>± 0.017               | 0.009<br>±0.015 | -0.000<br>±0.009 | -0.003<br>±0.010  | -0.002<br>±0.008  |
|                | AUC      | 0.539<br>±0.043 | 0.537<br>±0.042  | 0.542<br>±0.039 | 0.553<br>±0.050                | 0.538<br>±0.038                | 0.511<br>±0.017 | 0.503<br>±0.015  | 0.527<br>±0.032                | 0.507<br>±0.020 | 0.554<br>±0.025                | <b>0.577</b><br>± <b>0.034</b> | 0.518<br>±0.016 | 0.606<br>± 0.052               | 0.534<br>±0.029 | 0.498<br>±0.025  | 0.507<br>±0.021   | 0.497<br>±0.021   |
|                | BAcc     | 0.028<br>±0.011 | 0.030<br>±0.015  | 0.035<br>±0.013 | 0.033<br>±0.014                | 0.031<br>±0.013                | 0.031<br>±0.010 | 0.027<br>±0.012  | 0.034<br>±0.014                | 0.026<br>±0.010 | 0.037<br>±0.014                | <b>0.039</b><br>± <b>0.012</b> | 0.027<br>±0.011 | 0.042<br>± 0.017               | 0.033<br>±0.014 | 0.025<br>±0.009  | 0.022<br>±0.010   | 0.023<br>±0.008   |
|                | Acc.1    | 0.028<br>±0.011 | 0.030<br>±0.015  | 0.035<br>±0.013 | 0.033<br>±0.014                | 0.031<br>±0.013                | 0.031<br>±0.014 | 0.028<br>±0.015  | <b>0.039</b><br>± <b>0.018</b> | 0.027<br>±0.012 | 0.043<br>± 0.021               | 0.037<br>±0.017                | 0.024<br>±0.011 | 0.039<br>±0.022                | 0.035<br>±0.020 | 0.021<br>±0.011  | 0.020<br>±0.009   | 0.029<br>±0.015   |
|                | Acc.2    | 0.059<br>±0.018 | 0.061<br>±0.023  | 0.066<br>±0.020 | 0.066<br>±0.027                | 0.063<br>±0.020                | 0.059<br>±0.021 | 0.051<br>±0.019  | 0.070<br>±0.027                | 0.055<br>±0.020 | 0.080<br>± 0.026               | 0.072<br>±0.030                | 0.049<br>±0.017 | <b>0.080</b><br>± <b>0.031</b> | 0.070<br>±0.030 | 0.045<br>±0.019  | 0.040<br>±0.015   | 0.055<br>±0.029   |
|                |          |                 |                  |                 |                                |                                |                 |                  |                                |                 |                                |                                |                 |                                |                 |                  |                   |                   |

Continued on next page



| Subject        | Metric   | DeepConvnet          | EEGNet               | Conformer            | CTNet                       | SSVEPDNN             | BIOT (f)                    | BIOT (l)              | BENDR (f)            | BENDR (l)             | CBraMod (f)                 | CBraMod (l)                 | EEGPT (f)             | EEGPT (l)                   | LaBraM (f)           | LaBraM (l)           | STEEGformer-s (f)    | STEEGformer-s (l)     |
|----------------|----------|----------------------|----------------------|----------------------|-----------------------------|----------------------|-----------------------------|-----------------------|----------------------|-----------------------|-----------------------------|-----------------------------|-----------------------|-----------------------------|----------------------|----------------------|----------------------|-----------------------|
| Subject28_sync | $\kappa$ | 0.005<br>$\pm 0.011$ | 0.003<br>$\pm 0.012$ | 0.010<br>$\pm 0.016$ | 0.004<br>$\pm 0.011$        | 0.005<br>$\pm 0.011$ | 0.005<br>$\pm 0.011$        | -0.001<br>$\pm 0.011$ | 0.004<br>$\pm 0.013$ | -0.002<br>$\pm 0.011$ | 0.005<br>$\pm 0.013$        | -0.000<br>$\pm 0.008$       | -0.001<br>$\pm 0.010$ | <b>0.010</b><br>$\pm 0.016$ | 0.005<br>$\pm 0.011$ | 0.003<br>$\pm 0.011$ | 0.003<br>$\pm 0.011$ | 0.002<br>$\pm 0.009$  |
|                | AUC      | 0.540<br>$\pm 0.050$ | 0.531<br>$\pm 0.044$ | 0.545<br>$\pm 0.051$ | <b>0.546</b><br>$\pm 0.058$ | 0.527<br>$\pm 0.048$ | 0.515<br>$\pm 0.021$        | 0.505<br>$\pm 0.021$  | 0.516<br>$\pm 0.033$ | 0.507<br>$\pm 0.020$  | 0.520<br>$\pm 0.024$        | 0.510<br>$\pm 0.018$        | 0.509<br>$\pm 0.021$  | 0.561<br>$\pm 0.044$        | 0.518<br>$\pm 0.023$ | 0.505<br>$\pm 0.015$ | 0.511<br>$\pm 0.018$ | 0.531<br>$\pm 0.032$  |
|                | BAcc     | 0.030<br>$\pm 0.011$ | 0.028<br>$\pm 0.012$ | 0.034<br>$\pm 0.015$ | 0.029<br>$\pm 0.010$        | 0.030<br>$\pm 0.011$ | <b>0.030</b><br>$\pm 0.011$ | 0.024<br>$\pm 0.011$  | 0.029<br>$\pm 0.012$ | 0.023<br>$\pm 0.010$  | 0.029<br>$\pm 0.012$        | 0.025<br>$\pm 0.008$        | 0.024<br>$\pm 0.010$  | 0.034<br>$\pm 0.015$        | 0.029<br>$\pm 0.011$ | 0.028<br>$\pm 0.010$ | 0.028<br>$\pm 0.011$ | 0.027<br>$\pm 0.008$  |
|                | Acc.1    | 0.030<br>$\pm 0.011$ | 0.028<br>$\pm 0.012$ | 0.034<br>$\pm 0.015$ | 0.029<br>$\pm 0.010$        | 0.030<br>$\pm 0.011$ | 0.030<br>$\pm 0.017$        | 0.026<br>$\pm 0.015$  | 0.026<br>$\pm 0.013$ | 0.022<br>$\pm 0.011$  | 0.034<br>$\pm 0.015$        | 0.032<br>$\pm 0.013$        | 0.026<br>$\pm 0.016$  | <b>0.040</b><br>$\pm 0.022$ | 0.045<br>$\pm 0.019$ | 0.025<br>$\pm 0.014$ | 0.040<br>$\pm 0.017$ | 0.025<br>$\pm 0.014$  |
|                | Acc.2    | 0.064<br>$\pm 0.021$ | 0.057<br>$\pm 0.020$ | 0.066<br>$\pm 0.026$ | 0.059<br>$\pm 0.021$        | 0.059<br>$\pm 0.020$ | 0.063<br>$\pm 0.027$        | 0.052<br>$\pm 0.020$  | 0.058<br>$\pm 0.021$ | 0.050<br>$\pm 0.019$  | 0.070<br>$\pm 0.024$        | 0.069<br>$\pm 0.016$        | 0.056<br>$\pm 0.022$  | <b>0.075</b><br>$\pm 0.026$ | 0.085<br>$\pm 0.028$ | 0.046<br>$\pm 0.017$ | 0.074<br>$\pm 0.026$ | 0.051<br>$\pm 0.019$  |
| Subject29_sync | $\kappa$ | 0.004<br>$\pm 0.008$ | 0.004<br>$\pm 0.015$ | 0.007<br>$\pm 0.015$ | 0.002<br>$\pm 0.008$        | 0.002<br>$\pm 0.012$ | 0.004<br>$\pm 0.011$        | 0.001<br>$\pm 0.010$  | 0.004<br>$\pm 0.014$ | 0.003<br>$\pm 0.010$  | 0.012<br>$\pm 0.015$        | <b>0.017</b><br>$\pm 0.015$ | 0.003<br>$\pm 0.012$  | 0.018<br>$\pm 0.015$        | 0.007<br>$\pm 0.012$ | 0.000<br>$\pm 0.009$ | 0.003<br>$\pm 0.012$ | -0.001<br>$\pm 0.009$ |
|                | AUC      | 0.515<br>$\pm 0.015$ | 0.509<br>$\pm 0.022$ | 0.526<br>$\pm 0.033$ | 0.514<br>$\pm 0.016$        | 0.512<br>$\pm 0.020$ | 0.508<br>$\pm 0.018$        | 0.501<br>$\pm 0.018$  | 0.512<br>$\pm 0.023$ | 0.504<br>$\pm 0.025$  | 0.543<br>$\pm 0.018$        | <b>0.585</b><br>$\pm 0.041$ | 0.515<br>$\pm 0.021$  | 0.607<br>$\pm 0.040$        | 0.530<br>$\pm 0.021$ | 0.510<br>$\pm 0.023$ | 0.518<br>$\pm 0.028$ | 0.511<br>$\pm 0.024$  |
|                | BAcc     | 0.029<br>$\pm 0.008$ | 0.029<br>$\pm 0.014$ | 0.032<br>$\pm 0.015$ | 0.027<br>$\pm 0.008$        | 0.027<br>$\pm 0.011$ | 0.029<br>$\pm 0.011$        | 0.026<br>$\pm 0.009$  | 0.029<br>$\pm 0.014$ | 0.028<br>$\pm 0.010$  | 0.036<br>$\pm 0.014$        | <b>0.041</b><br>$\pm 0.015$ | 0.028<br>$\pm 0.012$  | 0.043<br>$\pm 0.015$        | 0.031<br>$\pm 0.012$ | 0.025<br>$\pm 0.009$ | 0.028<br>$\pm 0.012$ | 0.024<br>$\pm 0.009$  |
|                | Acc.1    | 0.029<br>$\pm 0.008$ | 0.029<br>$\pm 0.014$ | 0.032<br>$\pm 0.015$ | 0.027<br>$\pm 0.008$        | 0.027<br>$\pm 0.011$ | 0.027<br>$\pm 0.012$        | 0.027<br>$\pm 0.014$  | 0.029<br>$\pm 0.014$ | 0.028<br>$\pm 0.012$  | 0.041<br>$\pm 0.018$        | <b>0.042</b><br>$\pm 0.020$ | 0.029<br>$\pm 0.015$  | 0.049<br>$\pm 0.022$        | 0.035<br>$\pm 0.018$ | 0.033<br>$\pm 0.019$ | 0.028<br>$\pm 0.017$ | 0.019<br>$\pm 0.011$  |
|                | Acc.2    | 0.053<br>$\pm 0.013$ | 0.059<br>$\pm 0.018$ | 0.061<br>$\pm 0.019$ | 0.052<br>$\pm 0.012$        | 0.055<br>$\pm 0.014$ | 0.053<br>$\pm 0.017$        | 0.055<br>$\pm 0.019$  | 0.058<br>$\pm 0.028$ | 0.051<br>$\pm 0.018$  | 0.075<br>$\pm 0.025$        | <b>0.084</b><br>$\pm 0.029$ | 0.057<br>$\pm 0.024$  | 0.090<br>$\pm 0.025$        | 0.071<br>$\pm 0.025$ | 0.062<br>$\pm 0.023$ | 0.059<br>$\pm 0.026$ | 0.043<br>$\pm 0.018$  |
| Subject2_sync  | $\kappa$ | 0.007<br>$\pm 0.012$ | 0.007<br>$\pm 0.014$ | 0.013<br>$\pm 0.012$ | 0.010<br>$\pm 0.012$        | 0.007<br>$\pm 0.013$ | 0.009<br>$\pm 0.015$        | 0.001<br>$\pm 0.011$  | 0.006<br>$\pm 0.014$ | 0.001<br>$\pm 0.011$  | 0.014<br>$\pm 0.016$        | 0.023<br>$\pm 0.017$        | 0.001<br>$\pm 0.009$  | <b>0.017</b><br>$\pm 0.013$ | 0.013<br>$\pm 0.017$ | 0.005<br>$\pm 0.012$ | 0.008<br>$\pm 0.012$ | 0.002<br>$\pm 0.008$  |
|                | AUC      | 0.554<br>$\pm 0.035$ | 0.538<br>$\pm 0.030$ | 0.547<br>$\pm 0.029$ | 0.560<br>$\pm 0.035$        | 0.528<br>$\pm 0.030$ | 0.520<br>$\pm 0.017$        | 0.502<br>$\pm 0.021$  | 0.521<br>$\pm 0.021$ | 0.506<br>$\pm 0.019$  | 0.555<br>$\pm 0.025$        | <b>0.587</b><br>$\pm 0.026$ | 0.512<br>$\pm 0.024$  | 0.590<br>$\pm 0.033$        | 0.542<br>$\pm 0.022$ | 0.509<br>$\pm 0.024$ | 0.510<br>$\pm 0.017$ | 0.530<br>$\pm 0.030$  |
|                | BAcc     | 0.031<br>$\pm 0.011$ | 0.032<br>$\pm 0.014$ | 0.037<br>$\pm 0.012$ | 0.035<br>$\pm 0.011$        | 0.032<br>$\pm 0.013$ | 0.034<br>$\pm 0.014$        | 0.026<br>$\pm 0.011$  | 0.031<br>$\pm 0.014$ | 0.026<br>$\pm 0.011$  | 0.039<br>$\pm 0.015$        | 0.048<br>$\pm 0.017$        | 0.026<br>$\pm 0.008$  | <b>0.041</b><br>$\pm 0.013$ | 0.037<br>$\pm 0.016$ | 0.030<br>$\pm 0.011$ | 0.033<br>$\pm 0.012$ | 0.027<br>$\pm 0.008$  |
|                | Acc.1    | 0.031<br>$\pm 0.011$ | 0.032<br>$\pm 0.014$ | 0.037<br>$\pm 0.012$ | 0.035<br>$\pm 0.011$        | 0.032<br>$\pm 0.013$ | 0.033<br>$\pm 0.021$        | 0.024<br>$\pm 0.013$  | 0.031<br>$\pm 0.015$ | 0.028<br>$\pm 0.014$  | <b>0.046</b><br>$\pm 0.022$ | 0.051<br>$\pm 0.023$        | 0.028<br>$\pm 0.014$  | 0.044<br>$\pm 0.016$        | 0.043<br>$\pm 0.025$ | 0.036<br>$\pm 0.020$ | 0.037<br>$\pm 0.018$ | 0.029<br>$\pm 0.018$  |
|                | Acc.2    | 0.061<br>$\pm 0.012$ | 0.064<br>$\pm 0.020$ | 0.070<br>$\pm 0.017$ | 0.066<br>$\pm 0.019$        | 0.063<br>$\pm 0.019$ | 0.055<br>$\pm 0.022$        | 0.045<br>$\pm 0.018$  | 0.060<br>$\pm 0.023$ | 0.052<br>$\pm 0.017$  | <b>0.083</b><br>$\pm 0.028$ | 0.087<br>$\pm 0.028$        | 0.053<br>$\pm 0.019$  | 0.078<br>$\pm 0.019$        | 0.079<br>$\pm 0.030$ | 0.069<br>$\pm 0.026$ | 0.062<br>$\pm 0.025$ | 0.056<br>$\pm 0.024$  |
| Subject30_sync | $\kappa$ | 0.007<br>$\pm 0.014$ | 0.006<br>$\pm 0.014$ | 0.005<br>$\pm 0.016$ | 0.006<br>$\pm 0.010$        | 0.005<br>$\pm 0.013$ | 0.002<br>$\pm 0.010$        | 0.004<br>$\pm 0.011$  | 0.004<br>$\pm 0.014$ | 0.000<br>$\pm 0.011$  | <b>0.012</b><br>$\pm 0.014$ | 0.008<br>$\pm 0.011$        | 0.002<br>$\pm 0.011$  | 0.013<br>$\pm 0.017$        | 0.006<br>$\pm 0.011$ | 0.003<br>$\pm 0.010$ | 0.004<br>$\pm 0.010$ | 0.001<br>$\pm 0.012$  |

Continued on next page

| Subject        | Metric   | DeepConvnet      | EEGNet          | Conformer       | CTNet                          | SSVEPDNN        | BIOT <sup>(f)</sup> | BIOT <sup>(l)</sup> | BENDR <sup>(f)</sup> | BENDR <sup>(l)</sup> | CBraMod <sup>(f)</sup>         | CBraMod <sup>(l)</sup>         | EEGPT <sup>(f)</sup> | EEGPT <sup>(l)</sup>           | LaBraM <sup>(f)</sup> | LaBraM <sup>(l)</sup>          | STEEGformer-s <sup>(f)</sup> | STEEGformer-s <sup>(l)</sup> |
|----------------|----------|------------------|-----------------|-----------------|--------------------------------|-----------------|---------------------|---------------------|----------------------|----------------------|--------------------------------|--------------------------------|----------------------|--------------------------------|-----------------------|--------------------------------|------------------------------|------------------------------|
| Subject31_sync | AUC      | 0.528<br>±0.039  | 0.525<br>±0.045 | 0.532<br>±0.034 | 0.535<br>±0.043                | 0.523<br>±0.037 | 0.517<br>±0.021     | 0.505<br>±0.018     | 0.524<br>±0.031      | 0.506<br>±0.021      | 0.544<br>±0.027                | <b>0.563</b><br>± <b>0.037</b> | 0.510<br>±0.021      | 0.605<br>± 0.045               | 0.535<br>±0.032       | 0.498<br>±0.022                | 0.515<br>±0.025              | 0.516<br>±0.024              |
|                |          | 0.032<br>±0.014  | 0.031<br>±0.014 | 0.030<br>±0.016 | 0.030<br>±0.010                | 0.030<br>±0.013 | 0.027<br>±0.010     | 0.029<br>±0.010     | 0.029<br>±0.013      | 0.025<br>±0.011      | <b>0.037</b><br>± <b>0.014</b> | 0.033<br>±0.010                | 0.026<br>±0.011      | 0.037<br>± 0.017               | 0.031<br>±0.011       | 0.028<br>±0.009                | 0.029<br>±0.010              | 0.026<br>±0.012              |
|                | BAcc     | 0.032<br>±0.014  | 0.031<br>±0.014 | 0.030<br>±0.016 | 0.030<br>±0.010                | 0.030<br>±0.013 | 0.026<br>±0.012     | 0.025<br>±0.011     | 0.031<br>±0.021      | 0.023<br>±0.011      | 0.041<br>± 0.021               | 0.030<br>±0.014                | 0.027<br>±0.013      | 0.031<br>±0.016                | 0.036<br>±0.017       | <b>0.040</b><br>± <b>0.017</b> | 0.026<br>±0.015              | 0.023<br>±0.015              |
|                |          | 0.059<br>±0.019  | 0.062<br>±0.023 | 0.062<br>±0.020 | 0.060<br>±0.019                | 0.059<br>±0.018 | 0.058<br>±0.022     | 0.049<br>±0.016     | 0.060<br>±0.026      | 0.046<br>±0.018      | 0.077<br>± 0.032               | 0.060<br>±0.018                | 0.053<br>±0.021      | 0.063<br>±0.024                | 0.066<br>±0.028       | <b>0.067</b><br>± <b>0.022</b> | 0.048<br>±0.021              | 0.042<br>±0.018              |
|                | $\kappa$ | 0.004<br>±0.012  | 0.006<br>±0.014 | 0.007<br>±0.014 | 0.006<br>±0.013                | 0.009<br>±0.015 | 0.005<br>±0.013     | 0.001<br>±0.010     | 0.005<br>±0.014      | 0.002<br>±0.013      | <b>0.012</b><br>± <b>0.015</b> | 0.003<br>±0.009                | 0.005<br>±0.013      | 0.018<br>± 0.020               | 0.009<br>±0.011       | -0.001<br>±0.010               | 0.006<br>±0.009              | 0.005<br>±0.011              |
|                |          | 0.535<br>±0.037  | 0.521<br>±0.031 | 0.525<br>±0.033 | 0.538<br>±0.042                | 0.521<br>±0.034 | 0.519<br>±0.026     | 0.509<br>±0.015     | 0.522<br>±0.024      | 0.510<br>±0.024      | <b>0.556</b><br>± <b>0.035</b> | 0.515<br>±0.020                | 0.521<br>±0.025      | 0.600<br>± 0.050               | 0.526<br>±0.027       | 0.506<br>±0.021                | 0.522<br>±0.021              | 0.534<br>±0.035              |
|                | BAcc     | 0.029<br>±0.011  | 0.031<br>±0.013 | 0.032<br>±0.014 | 0.031<br>±0.013                | 0.034<br>±0.015 | 0.030<br>±0.013     | 0.026<br>±0.010     | 0.030<br>±0.013      | 0.026<br>±0.013      | <b>0.037</b><br>± <b>0.015</b> | 0.028<br>±0.009                | 0.030<br>±0.013      | 0.042<br>± 0.020               | 0.034<br>±0.011       | 0.024<br>±0.010                | 0.031<br>±0.009              | 0.029<br>±0.010              |
|                |          | 0.029<br>±0.011  | 0.031<br>±0.013 | 0.032<br>±0.014 | 0.031<br>±0.013                | 0.034<br>±0.015 | 0.030<br>±0.017     | 0.026<br>±0.011     | 0.030<br>±0.016      | 0.027<br>±0.017      | <b>0.035</b><br>± <b>0.017</b> | 0.021<br>±0.010                | 0.030<br>±0.013      | 0.047<br>± 0.027               | 0.026<br>±0.011       | 0.016<br>±0.007                | 0.033<br>±0.014              | 0.027<br>±0.011              |
|                | Acc.2    | 0.059<br>±0.020  | 0.059<br>±0.017 | 0.065<br>±0.022 | 0.059<br>±0.017                | 0.061<br>±0.022 | 0.062<br>±0.022     | 0.054<br>±0.018     | 0.055<br>±0.022      | 0.055<br>±0.023      | <b>0.068</b><br>± <b>0.021</b> | 0.044<br>±0.014                | 0.057<br>±0.024      | 0.082<br>± 0.037               | 0.053<br>±0.018       | 0.034<br>±0.008                | 0.062<br>±0.019              | 0.054<br>±0.018              |
|                |          | 0.014<br>±0.019  | 0.008<br>±0.015 | 0.006<br>±0.020 | <b>0.022</b><br>± <b>0.035</b> | 0.009<br>±0.017 | 0.012<br>±0.015     | 0.006<br>±0.014     | 0.007<br>±0.015      | -0.001<br>±0.013     | 0.008<br>±0.013                | 0.003<br>±0.011                | 0.003<br>±0.013      | 0.023<br>± 0.038               | 0.011<br>±0.013       | 0.000<br>±0.008                | 0.008<br>±0.013              | 0.001<br>±0.008              |
|                |          | 0.590<br>±0.066  | 0.531<br>±0.043 | 0.535<br>±0.046 | <b>0.596</b><br>± <b>0.075</b> | 0.536<br>±0.048 | 0.545<br>±0.037     | 0.537<br>±0.037     | 0.524<br>±0.024      | 0.503<br>±0.023      | 0.531<br>±0.034                | 0.532<br>±0.036                | 0.518<br>±0.027      | 0.597<br>± 0.073               | 0.535<br>±0.033       | 0.518<br>±0.025                | 0.533<br>±0.030              | 0.541<br>±0.030              |
| Subject32_sync | BAcc     | 0.038<br>±0.018  | 0.033<br>±0.015 | 0.031<br>±0.019 | <b>0.047</b><br>± <b>0.034</b> | 0.034<br>±0.016 | 0.036<br>±0.015     | 0.031<br>±0.014     | 0.031<br>±0.014      | 0.024<br>±0.013      | 0.032<br>±0.013                | 0.028<br>±0.011                | 0.028<br>±0.012      | 0.047<br>± 0.037               | 0.035<br>±0.013       | 0.025<br>±0.008                | 0.033<br>±0.012              | 0.026<br>±0.008              |
|                |          | 0.038<br>±0.018  | 0.033<br>±0.015 | 0.031<br>±0.019 | 0.047<br>± 0.034               | 0.034<br>±0.016 | 0.033<br>±0.019     | 0.027<br>±0.017     | 0.028<br>±0.017      | 0.024<br>±0.014      | 0.029<br>±0.015                | 0.034<br>±0.018                | 0.030<br>±0.014      | <b>0.047</b><br>± <b>0.043</b> | 0.032<br>±0.017       | 0.021<br>±0.010                | 0.029<br>±0.020              | 0.020<br>±0.010              |
|                | Acc.1    | 0.073<br>±0.030  | 0.064<br>±0.024 | 0.064<br>±0.030 | <b>0.087</b><br>± <b>0.046</b> | 0.066<br>±0.027 | 0.064<br>±0.033     | 0.054<br>±0.023     | 0.057<br>±0.025      | 0.051<br>±0.021      | 0.057<br>±0.021                | 0.070<br>±0.025                | 0.056<br>±0.022      | 0.090<br>± 0.067               | 0.057<br>±0.026       | 0.047<br>±0.017                | 0.055<br>±0.029              | 0.042<br>±0.017              |
|                |          | 0.010<br>± 0.014 | 0.004<br>±0.014 | 0.007<br>±0.013 | <b>0.009</b><br>± <b>0.015</b> | 0.007<br>±0.016 | 0.003<br>±0.010     | -0.002<br>±0.013    | 0.006<br>±0.016      | -0.001<br>±0.011     | -0.002<br>±0.012               | -0.003<br>±0.011               | 0.004<br>±0.014      | 0.004<br>±0.017                | 0.004<br>±0.011       | 0.003<br>±0.009                | 0.001<br>±0.007              | 0.002<br>±0.006              |
|                | AUC      | 0.549<br>± 0.055 | 0.538<br>±0.048 | 0.537<br>±0.039 | <b>0.546</b><br>± <b>0.058</b> | 0.530<br>±0.057 | 0.516<br>±0.021     | 0.503<br>±0.021     | 0.522<br>±0.036      | 0.506<br>±0.019      | 0.499<br>±0.031                | 0.489<br>±0.030                | 0.514<br>±0.024      | 0.504<br>±0.055                | 0.498<br>±0.024       | 0.517<br>±0.024                | 0.518<br>±0.026              | 0.540<br>±0.033              |

Continued on next page

| Subject        | Metric   | DeepConvnet                                                        | EEGNet      | Conformer            | CTNet                                            | SSVEPDNN    | BIOT (i)    | BIOT (i)     | BENDR (f)                                        | BENDR (i)    | CBraMod (f) | CBraMod (i)  | EEGPT (f)   | EEGPT (i)                                        | LaBraM (f)  | LaBraM (i)   | STEEGformer-s (i)    | STEEGformer-s (i)                                |
|----------------|----------|--------------------------------------------------------------------|-------------|----------------------|--------------------------------------------------|-------------|-------------|--------------|--------------------------------------------------|--------------|-------------|--------------|-------------|--------------------------------------------------|-------------|--------------|----------------------|--------------------------------------------------|
|                | BAcc     | $\begin{matrix} 0.034 \\ \pm 0.014 \end{matrix}$                   | $\pm 0.029$ | $\pm 0.032$          | $\pm \mathbf{0.034}$                             | $\pm 0.032$ | $\pm 0.028$ | $\pm 0.023$  | $\pm 0.031$                                      | $\pm 0.024$  | $\pm 0.023$ | $\pm 0.022$  | $\pm 0.029$ | $\pm 0.029$                                      | $\pm 0.029$ | $\pm 0.028$  | $\pm 0.026$          | $\pm 0.027$                                      |
|                | Acc.1    | $\begin{matrix} 0.034 \\ \pm 0.014 \end{matrix}$                   | $\pm 0.029$ | $\pm 0.032$          | $\pm 0.034$                                      | $\pm 0.032$ | $\pm 0.036$ | $\pm 0.031$  | $\pm 0.033$                                      | $\pm 0.024$  | $\pm 0.026$ | $\pm 0.025$  | $\pm 0.033$ | $\pm 0.034$                                      | $\pm 0.028$ | $\pm 0.021$  | $\pm \mathbf{0.051}$ | $\begin{matrix} 0.053 \\ \pm 0.019 \end{matrix}$ |
|                | Acc.2    | $\begin{matrix} 0.064 \\ \pm 0.016 \end{matrix}$                   | $\pm 0.060$ | $\pm 0.067$          | $\pm 0.061$                                      | $\pm 0.060$ | $\pm 0.073$ | $\pm 0.063$  | $\pm 0.063$                                      | $\pm 0.053$  | $\pm 0.056$ | $\pm 0.056$  | $\pm 0.064$ | $\pm 0.064$                                      | $\pm 0.050$ | $\pm 0.044$  | $\pm \mathbf{0.094}$ | $\begin{matrix} 0.097 \\ \pm 0.027 \end{matrix}$ |
|                |          |                                                                    | $\pm 0.020$ | $\pm 0.018$          | $\pm 0.019$                                      | $\pm 0.025$ | $\pm 0.030$ | $\pm 0.021$  | $\pm 0.029$                                      | $\pm 0.020$  | $\pm 0.022$ | $\pm 0.023$  | $\pm 0.027$ | $\pm 0.035$                                      | $\pm 0.030$ | $\pm 0.017$  | $\pm \mathbf{0.022}$ |                                                  |
| Subject34_sync | $\kappa$ | $\begin{matrix} 0.004 \\ \pm 0.012 \end{matrix}$                   | $\pm 0.003$ | $\pm 0.006$          | $\pm \mathbf{0.019}$                             | $\pm 0.005$ | $\pm 0.003$ | $\pm -0.002$ | $\pm 0.009$                                      | $\pm 0.005$  | $\pm 0.004$ | $\pm -0.001$ | $\pm 0.003$ | $\begin{matrix} 0.039 \\ \pm 0.039 \end{matrix}$ | $\pm 0.010$ | $\pm -0.000$ | $\pm 0.002$          | $\pm 0.001$                                      |
|                | AUC      | $\begin{matrix} 0.523 \\ \pm 0.035 \end{matrix}$                   | $\pm 0.521$ | $\pm 0.524$          | $\pm \mathbf{0.599}$                             | $\pm 0.529$ | $\pm 0.518$ | $\pm 0.504$  | $\pm 0.519$                                      | $\pm 0.509$  | $\pm 0.524$ | $\pm 0.514$  | $\pm 0.522$ | $\begin{matrix} 0.642 \\ \pm 0.087 \end{matrix}$ | $\pm 0.518$ | $\pm 0.508$  | $\pm 0.516$          | $\pm 0.519$                                      |
|                | BAcc     | $\begin{matrix} 0.029 \\ \pm 0.011 \end{matrix}$                   | $\pm 0.028$ | $\pm 0.030$          | $\pm \mathbf{0.043}$                             | $\pm 0.030$ | $\pm 0.028$ | $\pm 0.024$  | $\pm 0.033$                                      | $\pm 0.030$  | $\pm 0.029$ | $\pm 0.024$  | $\pm 0.028$ | $\begin{matrix} 0.063 \\ \pm 0.038 \end{matrix}$ | $\pm 0.035$ | $\pm 0.025$  | $\pm 0.027$          | $\pm 0.026$                                      |
|                | Acc.1    | $\begin{matrix} 0.029 \\ \pm 0.011 \end{matrix}$                   | $\pm 0.028$ | $\pm 0.030$          | $\pm \mathbf{0.043}$                             | $\pm 0.030$ | $\pm 0.030$ | $\pm 0.025$  | $\pm 0.035$                                      | $\pm 0.030$  | $\pm 0.042$ | $\pm 0.028$  | $\pm 0.035$ | $\begin{matrix} 0.085 \\ \pm 0.049 \end{matrix}$ | $\pm 0.041$ | $\pm 0.041$  | $\pm 0.026$          | $\pm 0.027$                                      |
|                | Acc.2    | $\begin{matrix} 0.056 \\ \pm 0.016 \end{matrix}$                   | $\pm 0.056$ | $\pm 0.061$          | $\pm \mathbf{0.089}$                             | $\pm 0.061$ | $\pm 0.062$ | $\pm 0.060$  | $\pm 0.062$                                      | $\pm 0.059$  | $\pm 0.078$ | $\pm 0.054$  | $\pm 0.066$ | $\begin{matrix} 0.150 \\ \pm 0.076 \end{matrix}$ | $\pm 0.078$ | $\pm 0.079$  | $\pm 0.056$          | $\pm 0.060$                                      |
|                |          |                                                                    | $\pm 0.020$ | $\pm 0.013$          | $\pm \mathbf{0.044}$                             | $\pm 0.019$ | $\pm 0.022$ | $\pm 0.022$  | $\pm 0.022$                                      | $\pm 0.021$  | $\pm 0.028$ | $\pm 0.019$  | $\pm 0.025$ |                                                  | $\pm 0.026$ | $\pm 0.025$  | $\pm 0.019$          | $\pm 0.019$                                      |
|                | $\kappa$ | $\begin{matrix} 0.008 \\ \pm 0.013 \end{matrix}$                   | $\pm 0.005$ | $\pm 0.005$          | $\pm 0.007$                                      | $\pm 0.006$ | $\pm 0.005$ | $\pm 0.004$  | $\begin{matrix} 0.009 \\ \pm 0.011 \end{matrix}$ | $\pm -0.003$ | $\pm 0.007$ | $\pm 0.002$  | $\pm 0.004$ | $\pm \mathbf{0.009}$                             | $\pm 0.003$ | $\pm 0.003$  | $\pm 0.006$          | $\pm 0.003$                                      |
|                | AUC      | $\begin{matrix} 0.539 \\ \pm 0.049 \end{matrix}$                   | $\pm 0.526$ | $\pm 0.529$          | $\begin{matrix} 0.547 \\ \pm 0.061 \end{matrix}$ | $\pm 0.529$ | $\pm 0.522$ | $\pm 0.511$  | $\pm 0.523$                                      | $\pm 0.503$  | $\pm 0.515$ | $\pm 0.496$  | $\pm 0.514$ | $\pm \mathbf{0.539}$                             | $\pm 0.510$ | $\pm 0.515$  | $\pm 0.523$          | $\pm 0.525$                                      |
| Subject35_sync | BAcc     | $\begin{matrix} 0.032 \\ \pm 0.013 \end{matrix}$                   | $\pm 0.030$ | $\pm 0.030$          | $\pm 0.032$                                      | $\pm 0.031$ | $\pm 0.030$ | $\pm 0.029$  | $\begin{matrix} 0.034 \\ \pm 0.011 \end{matrix}$ | $\pm 0.022$  | $\pm 0.032$ | $\pm 0.027$  | $\pm 0.029$ | $\pm \mathbf{0.034}$                             | $\pm 0.028$ | $\pm 0.028$  | $\pm 0.031$          | $\pm 0.028$                                      |
|                | Acc.1    | $\begin{matrix} 0.032 \\ \pm 0.013 \end{matrix}$                   | $\pm 0.030$ | $\pm 0.030$          | $\pm \mathbf{0.032}$                             | $\pm 0.031$ | $\pm 0.032$ | $\pm 0.028$  | $\pm 0.029$                                      | $\pm 0.022$  | $\pm 0.028$ | $\pm 0.025$  | $\pm 0.030$ | $\pm 0.028$                                      | $\pm 0.025$ | $\pm 0.026$  | $\pm 0.031$          | $\pm 0.027$                                      |
|                | Acc.2    | $\begin{matrix} 0.060 \\ \pm 0.021 \end{matrix}$                   | $\pm 0.061$ | $\pm \mathbf{0.063}$ | $\begin{matrix} 0.066 \\ \pm 0.026 \end{matrix}$ | $\pm 0.062$ | $\pm 0.060$ | $\pm 0.058$  | $\pm 0.055$                                      | $\pm 0.046$  | $\pm 0.047$ | $\pm 0.051$  | $\pm 0.058$ | $\pm 0.057$                                      | $\pm 0.048$ | $\pm 0.050$  | $\pm 0.056$          | $\pm 0.051$                                      |
|                |          |                                                                    | $\pm 0.025$ | $\pm \mathbf{0.024}$ | $\pm 0.026$                                      | $\pm 0.022$ | $\pm 0.024$ | $\pm 0.022$  | $\pm 0.020$                                      | $\pm 0.020$  | $\pm 0.018$ | $\pm 0.022$  | $\pm 0.020$ | $\pm 0.034$                                      | $\pm 0.023$ | $\pm 0.020$  | $\pm 0.024$          | $\pm 0.019$                                      |
| Subject3_sync  | $\kappa$ | $\begin{matrix} \mathbf{0.042} \\ \pm \mathbf{0.096} \end{matrix}$ | $\pm 0.008$ | $\pm 0.018$          | $\begin{matrix} 0.053 \\ \pm 0.117 \end{matrix}$ | $\pm 0.005$ | $\pm 0.032$ | $\pm 0.011$  | $\pm 0.005$                                      | $\pm -0.001$ | $\pm 0.007$ | $\pm 0.010$  | $\pm 0.010$ | $\pm 0.028$                                      | $\pm 0.034$ | $\pm 0.007$  | $\pm 0.019$          | $\pm 0.006$                                      |
|                | AUC      | $\begin{matrix} 0.615 \\ \pm 0.115 \end{matrix}$                   | $\pm 0.537$ | $\pm 0.549$          | $\pm \mathbf{0.628}$                             | $\pm 0.528$ | $\pm 0.568$ | $\pm 0.531$  | $\pm 0.528$                                      | $\pm 0.511$  | $\pm 0.527$ | $\pm 0.553$  | $\pm 0.546$ | $\begin{matrix} 0.637 \\ \pm 0.094 \end{matrix}$ | $\pm 0.569$ | $\pm 0.518$  | $\pm 0.556$          | $\pm 0.525$                                      |
|                | BAcc     | $\begin{matrix} \mathbf{0.066} \\ \pm \mathbf{0.093} \end{matrix}$ | $\pm 0.033$ | $\pm 0.043$          | $\begin{matrix} 0.076 \\ \pm 0.114 \end{matrix}$ | $\pm 0.030$ | $\pm 0.057$ | $\pm 0.036$  | $\pm 0.030$                                      | $\pm 0.024$  | $\pm 0.031$ | $\pm 0.034$  | $\pm 0.035$ | $\pm 0.053$                                      | $\pm 0.059$ | $\pm 0.032$  | $\pm 0.044$          | $\pm 0.031$                                      |
|                |          |                                                                    | $\pm 0.018$ | $\pm 0.035$          | $\pm 0.114$                                      | $\pm 0.015$ | $\pm 0.070$ | $\pm 0.040$  | $\pm 0.019$                                      | $\pm 0.012$  | $\pm 0.015$ | $\pm 0.017$  | $\pm 0.032$ | $\pm 0.069$                                      | $\pm 0.076$ | $\pm 0.009$  | $\pm 0.041$          | $\pm 0.010$                                      |

Continued on next page

| Subject       | Metric   | DeepConvnet                 | EEGNet               | Conformer            | CTNet                                            | SSVEPDNN             | BIOT (f)             | BIOT (l)             | BENDR (f)            | BENDR (l)             | CBraMod (f)          | CBraMod (l)                                      | EEGPT (f)            | EEGPT (l)                                        | LaBraM (f)                  | LaBraM (l)           | STEEGformer-s (f)           | STEEGformer-s (l)    |
|---------------|----------|-----------------------------|----------------------|----------------------|--------------------------------------------------|----------------------|----------------------|----------------------|----------------------|-----------------------|----------------------|--------------------------------------------------|----------------------|--------------------------------------------------|-----------------------------|----------------------|-----------------------------|----------------------|
| Subject4_sync | Acc.1    | <b>0.066</b><br>$\pm 0.093$ | 0.033<br>$\pm 0.018$ | 0.043<br>$\pm 0.035$ | $\begin{matrix} 0.076 \\ \pm 0.114 \end{matrix}$ | 0.030<br>$\pm 0.015$ | 0.058<br>$\pm 0.067$ | 0.036<br>$\pm 0.043$ | 0.030<br>$\pm 0.018$ | 0.021<br>$\pm 0.015$  | 0.032<br>$\pm 0.019$ | 0.034<br>$\pm 0.023$                             | 0.034<br>$\pm 0.031$ | 0.046<br>$\pm 0.070$                             | 0.047<br>$\pm 0.070$        | 0.035<br>$\pm 0.015$ | 0.036<br>$\pm 0.042$        | 0.029<br>$\pm 0.017$ |
|               | Acc.2    | <b>0.113</b><br>$\pm 0.127$ | 0.066<br>$\pm 0.024$ | 0.078<br>$\pm 0.053$ | $\begin{matrix} 0.133 \\ \pm 0.145 \end{matrix}$ | 0.061<br>$\pm 0.023$ | 0.093<br>$\pm 0.090$ | 0.066<br>$\pm 0.058$ | 0.061<br>$\pm 0.028$ | 0.051<br>$\pm 0.026$  | 0.062<br>$\pm 0.024$ | 0.065<br>$\pm 0.031$                             | 0.073<br>$\pm 0.049$ | 0.096<br>$\pm 0.110$                             | 0.082<br>$\pm 0.100$        | 0.059<br>$\pm 0.020$ | 0.068<br>$\pm 0.056$        | 0.056<br>$\pm 0.023$ |
|               | $\kappa$ | 0.003<br>$\pm 0.011$        | 0.002<br>$\pm 0.013$ | 0.007<br>$\pm 0.014$ | 0.002<br>$\pm 0.012$                             | 0.001<br>$\pm 0.012$ | 0.008<br>$\pm 0.013$ | 0.002<br>$\pm 0.011$ | 0.006<br>$\pm 0.012$ | -0.000<br>$\pm 0.012$ | 0.006<br>$\pm 0.011$ | <b>0.014</b><br>$\pm 0.012$                      | 0.003<br>$\pm 0.012$ | $\begin{matrix} 0.018 \\ \pm 0.017 \end{matrix}$ | 0.002<br>$\pm 0.009$        | 0.002<br>$\pm 0.010$ | 0.001<br>$\pm 0.007$        | 0.004<br>$\pm 0.005$ |
|               | AUC      | 0.520<br>$\pm 0.031$        | 0.524<br>$\pm 0.029$ | 0.529<br>$\pm 0.026$ | 0.517<br>$\pm 0.031$                             | 0.513<br>$\pm 0.025$ | 0.524<br>$\pm 0.027$ | 0.505<br>$\pm 0.021$ | 0.516<br>$\pm 0.025$ | 0.503<br>$\pm 0.021$  | 0.553<br>$\pm 0.021$ | <b>0.570</b><br>$\pm 0.034$                      | 0.510<br>$\pm 0.021$ | $\begin{matrix} 0.600 \\ \pm 0.043 \end{matrix}$ | 0.519<br>$\pm 0.025$        | 0.508<br>$\pm 0.020$ | 0.514<br>$\pm 0.023$        | 0.520<br>$\pm 0.021$ |
|               | BAcc     | 0.028<br>$\pm 0.011$        | 0.027<br>$\pm 0.012$ | 0.032<br>$\pm 0.013$ | 0.027<br>$\pm 0.012$                             | 0.026<br>$\pm 0.011$ | 0.033<br>$\pm 0.012$ | 0.027<br>$\pm 0.011$ | 0.031<br>$\pm 0.012$ | 0.025<br>$\pm 0.012$  | 0.030<br>$\pm 0.011$ | <b>0.039</b><br>$\pm 0.012$                      | 0.028<br>$\pm 0.012$ | $\begin{matrix} 0.043 \\ \pm 0.017 \end{matrix}$ | 0.027<br>$\pm 0.009$        | 0.026<br>$\pm 0.010$ | 0.026<br>$\pm 0.007$        | 0.029<br>$\pm 0.005$ |
|               | Acc.1    | 0.028<br>$\pm 0.011$        | 0.027<br>$\pm 0.012$ | 0.032<br>$\pm 0.013$ | 0.027<br>$\pm 0.012$                             | 0.026<br>$\pm 0.011$ | 0.030<br>$\pm 0.015$ | 0.027<br>$\pm 0.013$ | 0.033<br>$\pm 0.020$ | 0.023<br>$\pm 0.012$  | 0.032<br>$\pm 0.013$ | $\begin{matrix} 0.050 \\ \pm 0.022 \end{matrix}$ | 0.033<br>$\pm 0.015$ | <b>0.039</b><br>$\pm 0.017$                      | 0.026<br>$\pm 0.015$        | 0.021<br>$\pm 0.011$ | 0.022<br>$\pm 0.009$        | 0.027<br>$\pm 0.008$ |
| Subject5_sync | Acc.2    | 0.054<br>$\pm 0.014$        | 0.060<br>$\pm 0.021$ | 0.062<br>$\pm 0.016$ | 0.057<br>$\pm 0.015$                             | 0.055<br>$\pm 0.016$ | 0.057<br>$\pm 0.021$ | 0.056<br>$\pm 0.023$ | 0.066<br>$\pm 0.030$ | 0.044<br>$\pm 0.014$  | 0.075<br>$\pm 0.031$ | $\begin{matrix} 0.092 \\ \pm 0.033 \end{matrix}$ | 0.063<br>$\pm 0.020$ | <b>0.075</b><br>$\pm 0.028$                      | 0.050<br>$\pm 0.023$        | 0.046<br>$\pm 0.020$ | 0.049<br>$\pm 0.013$        | 0.047<br>$\pm 0.011$ |
|               | $\kappa$ | 0.031<br>$\pm 0.066$        | 0.007<br>$\pm 0.015$ | 0.023<br>$\pm 0.040$ | $\begin{matrix} 0.044 \\ \pm 0.098 \end{matrix}$ | 0.005<br>$\pm 0.016$ | 0.022<br>$\pm 0.044$ | 0.016<br>$\pm 0.038$ | 0.010<br>$\pm 0.017$ | 0.008<br>$\pm 0.012$  | 0.009<br>$\pm 0.014$ | 0.009<br>$\pm 0.019$                             | 0.014<br>$\pm 0.035$ | 0.030<br>$\pm 0.070$                             | <b>0.037</b><br>$\pm 0.083$ | 0.002<br>$\pm 0.011$ | 0.018<br>$\pm 0.038$        | 0.000<br>$\pm 0.010$ |
|               | AUC      | 0.608<br>$\pm 0.097$        | 0.538<br>$\pm 0.047$ | 0.562<br>$\pm 0.063$ | $\begin{matrix} 0.631 \\ \pm 0.116 \end{matrix}$ | 0.534<br>$\pm 0.049$ | 0.555<br>$\pm 0.064$ | 0.534<br>$\pm 0.058$ | 0.536<br>$\pm 0.041$ | 0.513<br>$\pm 0.025$  | 0.528<br>$\pm 0.031$ | 0.546<br>$\pm 0.036$                             | 0.546<br>$\pm 0.056$ | <b>0.621</b><br>$\pm 0.096$                      | 0.569<br>$\pm 0.084$        | 0.512<br>$\pm 0.018$ | 0.554<br>$\pm 0.058$        | 0.522<br>$\pm 0.029$ |
|               | BAcc     | 0.055<br>$\pm 0.064$        | 0.032<br>$\pm 0.014$ | 0.047<br>$\pm 0.039$ | $\begin{matrix} 0.068 \\ \pm 0.096 \end{matrix}$ | 0.030<br>$\pm 0.016$ | 0.046<br>$\pm 0.043$ | 0.040<br>$\pm 0.037$ | 0.034<br>$\pm 0.016$ | 0.032<br>$\pm 0.012$  | 0.034<br>$\pm 0.013$ | 0.034<br>$\pm 0.018$                             | 0.038<br>$\pm 0.034$ | 0.055<br>$\pm 0.068$                             | <b>0.061</b><br>$\pm 0.081$ | 0.027<br>$\pm 0.011$ | 0.042<br>$\pm 0.037$        | 0.025<br>$\pm 0.010$ |
|               | Acc.1    | 0.055<br>$\pm 0.064$        | 0.032<br>$\pm 0.014$ | 0.047<br>$\pm 0.039$ | $\begin{matrix} 0.068 \\ \pm 0.096 \end{matrix}$ | 0.030<br>$\pm 0.016$ | 0.045<br>$\pm 0.047$ | 0.034<br>$\pm 0.039$ | 0.033<br>$\pm 0.020$ | 0.031<br>$\pm 0.013$  | 0.032<br>$\pm 0.014$ | 0.033<br>$\pm 0.024$                             | 0.038<br>$\pm 0.032$ | 0.052<br>$\pm 0.072$                             | <b>0.061</b><br>$\pm 0.086$ | 0.028<br>$\pm 0.014$ | 0.046<br>$\pm 0.042$        | 0.019<br>$\pm 0.011$ |
|               | Acc.2    | 0.095<br>$\pm 0.095$        | 0.059<br>$\pm 0.022$ | 0.085<br>$\pm 0.057$ | $\begin{matrix} 0.119 \\ \pm 0.124 \end{matrix}$ | 0.064<br>$\pm 0.027$ | 0.083<br>$\pm 0.067$ | 0.063<br>$\pm 0.061$ | 0.063<br>$\pm 0.033$ | 0.056<br>$\pm 0.019$  | 0.063<br>$\pm 0.023$ | 0.063<br>$\pm 0.032$                             | 0.071<br>$\pm 0.047$ | 0.096<br>$\pm 0.092$                             | <b>0.097</b><br>$\pm 0.109$ | 0.051<br>$\pm 0.021$ | 0.086<br>$\pm 0.059$        | 0.041<br>$\pm 0.017$ |
| Subject6_sync | $\kappa$ | 0.013<br>$\pm 0.014$        | 0.012<br>$\pm 0.013$ | 0.014<br>$\pm 0.015$ | <b>0.029</b><br>$\pm 0.042$                      | 0.014<br>$\pm 0.013$ | 0.015<br>$\pm 0.018$ | 0.008<br>$\pm 0.014$ | 0.014<br>$\pm 0.016$ | 0.003<br>$\pm 0.013$  | 0.017<br>$\pm 0.013$ | 0.018<br>$\pm 0.015$                             | 0.008<br>$\pm 0.017$ | $\begin{matrix} 0.031 \\ \pm 0.050 \end{matrix}$ | 0.023<br>$\pm 0.025$        | 0.002<br>$\pm 0.008$ | 0.016<br>$\pm 0.014$        | 0.004<br>$\pm 0.009$ |
|               | AUC      | 0.576<br>$\pm 0.054$        | 0.554<br>$\pm 0.050$ | 0.561<br>$\pm 0.049$ | <b>0.614</b><br>$\pm 0.088$                      | 0.549<br>$\pm 0.051$ | 0.543<br>$\pm 0.037$ | 0.528<br>$\pm 0.036$ | 0.540<br>$\pm 0.043$ | 0.504<br>$\pm 0.015$  | 0.572<br>$\pm 0.035$ | 0.592<br>$\pm 0.035$                             | 0.534<br>$\pm 0.033$ | $\begin{matrix} 0.621 \\ \pm 0.095 \end{matrix}$ | 0.562<br>$\pm 0.048$        | 0.511<br>$\pm 0.018$ | 0.555<br>$\pm 0.048$        | 0.540<br>$\pm 0.032$ |
|               | BAcc     | 0.038<br>$\pm 0.013$        | 0.037<br>$\pm 0.013$ | 0.039<br>$\pm 0.015$ | <b>0.053</b><br>$\pm 0.041$                      | 0.039<br>$\pm 0.013$ | 0.039<br>$\pm 0.017$ | 0.033<br>$\pm 0.013$ | 0.039<br>$\pm 0.015$ | 0.028<br>$\pm 0.012$  | 0.042<br>$\pm 0.013$ | 0.043<br>$\pm 0.014$                             | 0.033<br>$\pm 0.016$ | $\begin{matrix} 0.056 \\ \pm 0.048 \end{matrix}$ | 0.048<br>$\pm 0.025$        | 0.026<br>$\pm 0.008$ | 0.041<br>$\pm 0.014$        | 0.029<br>$\pm 0.009$ |
|               | Acc.1    | 0.038<br>$\pm 0.013$        | 0.037<br>$\pm 0.013$ | 0.039<br>$\pm 0.015$ | $\begin{matrix} 0.060 \\ \pm 0.054 \end{matrix}$ | 0.039<br>$\pm 0.013$ | 0.053<br>$\pm 0.025$ | 0.048<br>$\pm 0.021$ | 0.038<br>$\pm 0.019$ | 0.025<br>$\pm 0.014$  | 0.041<br>$\pm 0.015$ | 0.041<br>$\pm 0.019$                             | 0.034<br>$\pm 0.017$ | $\begin{matrix} 0.060 \\ \pm 0.054 \end{matrix}$ | 0.049<br>$\pm 0.031$        | 0.032<br>$\pm 0.013$ | <b>0.058</b><br>$\pm 0.031$ | 0.032<br>$\pm 0.012$ |
|               | Acc.2    | 0.038<br>$\pm 0.013$        | 0.037<br>$\pm 0.013$ | 0.039<br>$\pm 0.015$ | $\begin{matrix} 0.060 \\ \pm 0.054 \end{matrix}$ | 0.039<br>$\pm 0.013$ | 0.053<br>$\pm 0.025$ | 0.048<br>$\pm 0.021$ | 0.038<br>$\pm 0.019$ | 0.025<br>$\pm 0.014$  | 0.041<br>$\pm 0.015$ | 0.041<br>$\pm 0.019$                             | 0.034<br>$\pm 0.017$ | $\begin{matrix} 0.060 \\ \pm 0.054 \end{matrix}$ | 0.049<br>$\pm 0.031$        | 0.032<br>$\pm 0.013$ | <b>0.058</b><br>$\pm 0.031$ | 0.032<br>$\pm 0.012$ |
|               | Acc.2    | 0.038<br>$\pm 0.013$        | 0.037<br>$\pm 0.013$ | 0.039<br>$\pm 0.015$ | $\begin{matrix} 0.060 \\ \pm 0.054 \end{matrix}$ | 0.039<br>$\pm 0.013$ | 0.053<br>$\pm 0.025$ | 0.048<br>$\pm 0.021$ | 0.038<br>$\pm 0.019$ | 0.025<br>$\pm 0.014$  | 0.041<br>$\pm 0.015$ | 0.041<br>$\pm 0.019$                             | 0.034<br>$\pm 0.017$ | $\begin{matrix} 0.060 \\ \pm 0.054 \end{matrix}$ | 0.049<br>$\pm 0.031$        | 0.032<br>$\pm 0.013$ | <b>0.058</b><br>$\pm 0.031$ | 0.032<br>$\pm 0.012$ |

Continued on next page

| Subject       | Metric   | DeepConvnet     | EEGNet          | Conformer       | CTNet                          | SSVEPDNN        | BIOT (f)        | BIOT (l)         | BENDR (f)       | BENDR (l)        | CBraMod (f)                    | CBraMod (l)      | EEGPT (f)       | EEGPT (l)                      | LaBraM (f)       | LaBraM (l)       | STEEGformer-s (f) | STEEGformer-s (l)              |
|---------------|----------|-----------------|-----------------|-----------------|--------------------------------|-----------------|-----------------|------------------|-----------------|------------------|--------------------------------|------------------|-----------------|--------------------------------|------------------|------------------|-------------------|--------------------------------|
|               | Acc.2    | 0.073<br>±0.024 | 0.068<br>±0.020 | 0.071<br>±0.024 | 0.101<br>±0.061                | 0.070<br>±0.023 | 0.099<br>±0.037 | 0.083<br>±0.028  | 0.070<br>±0.026 | 0.050<br>±0.023  | 0.079<br>±0.031                | 0.079<br>±0.025  | 0.068<br>±0.030 | <b>0.109</b><br>± <b>0.084</b> | 0.092<br>±0.048  | 0.057<br>±0.017  | 0.115<br>± 0.058  | 0.060<br>±0.018                |
| Subject7_sync | $\kappa$ | 0.006<br>±0.013 | 0.007<br>±0.015 | 0.009<br>±0.015 | 0.012<br>±0.017                | 0.010<br>±0.017 | 0.002<br>±0.010 | -0.001<br>±0.009 | 0.004<br>±0.013 | 0.005<br>±0.013  | <b>0.013</b><br>± <b>0.011</b> | 0.011<br>±0.013  | 0.002<br>±0.012 | 0.025<br>± 0.027               | 0.010<br>±0.016  | 0.002<br>±0.009  | 0.004<br>±0.009   | 0.006<br>±0.011                |
|               | AUC      | 0.551<br>±0.057 | 0.529<br>±0.050 | 0.544<br>±0.047 | <b>0.579</b><br>± <b>0.061</b> | 0.534<br>±0.046 | 0.512<br>±0.025 | 0.512<br>±0.026  | 0.523<br>±0.036 | 0.509<br>±0.020  | 0.541<br>±0.033                | 0.577<br>±0.036  | 0.515<br>±0.026 | 0.626<br>± 0.064               | 0.533<br>±0.029  | 0.522<br>±0.027  | 0.521<br>±0.021   | 0.546<br>±0.034                |
|               | BAcc     | 0.031<br>±0.013 | 0.032<br>±0.015 | 0.034<br>±0.014 | 0.037<br>±0.017                | 0.034<br>±0.017 | 0.027<br>±0.010 | 0.024<br>±0.009  | 0.029<br>±0.013 | 0.030<br>±0.012  | <b>0.038</b><br>± <b>0.011</b> | 0.036<br>±0.013  | 0.027<br>±0.012 | 0.049<br>± 0.026               | 0.034<br>±0.016  | 0.027<br>±0.009  | 0.029<br>±0.009   | 0.031<br>±0.011                |
|               | Acc.1    | 0.031<br>±0.013 | 0.032<br>±0.015 | 0.034<br>±0.014 | 0.037<br>±0.017                | 0.034<br>±0.017 | 0.019<br>±0.008 | 0.017<br>±0.007  | 0.025<br>±0.014 | 0.029<br>±0.015  | 0.036<br>±0.014                | 0.024<br>± 0.021 | 0.024<br>±0.014 | <b>0.037</b><br>± <b>0.021</b> | 0.032<br>±0.024  | 0.029<br>±0.017  | 0.030<br>±0.016   | 0.025<br>±0.013                |
|               | Acc.2    | 0.059<br>±0.018 | 0.061<br>±0.022 | 0.068<br>±0.025 | 0.072<br>±0.024                | 0.067<br>±0.023 | 0.042<br>±0.014 | 0.039<br>±0.013  | 0.055<br>±0.022 | 0.058<br>±0.021  | <b>0.072</b><br>± <b>0.026</b> | 0.088<br>± 0.032 | 0.049<br>±0.019 | 0.067<br>±0.035                | 0.061<br>±0.038  | 0.059<br>±0.027  | 0.060<br>±0.029   | 0.045<br>±0.016                |
|               |          |                 |                 |                 |                                |                 |                 |                  |                 |                  |                                |                  |                 |                                |                  |                  |                   |                                |
| Subject8_sync | $\kappa$ | 0.000<br>±0.010 | 0.003<br>±0.012 | 0.008<br>±0.014 | <b>0.029</b><br>± <b>0.037</b> | 0.007<br>±0.013 | 0.005<br>±0.014 | 0.002<br>±0.011  | 0.009<br>±0.016 | 0.001<br>±0.009  | 0.003<br>±0.012                | 0.008<br>±0.011  | 0.005<br>±0.013 | 0.040<br>± 0.047               | 0.007<br>±0.014  | -0.001<br>±0.012 | 0.001<br>±0.011   | -0.000<br>±0.008               |
|               | AUC      | 0.525<br>±0.032 | 0.520<br>±0.045 | 0.521<br>±0.032 | <b>0.595</b><br>± <b>0.088</b> | 0.525<br>±0.034 | 0.519<br>±0.028 | 0.511<br>±0.019  | 0.523<br>±0.031 | 0.510<br>±0.022  | 0.520<br>±0.028                | 0.522<br>±0.025  | 0.526<br>±0.026 | 0.652<br>± 0.086               | 0.522<br>±0.022  | 0.505<br>±0.021  | 0.516<br>±0.026   | 0.515<br>±0.020                |
|               | BAcc     | 0.025<br>±0.009 | 0.028<br>±0.012 | 0.033<br>±0.013 | <b>0.053</b><br>± <b>0.036</b> | 0.032<br>±0.013 | 0.030<br>±0.013 | 0.027<br>±0.011  | 0.034<br>±0.015 | 0.026<br>±0.009  | 0.028<br>±0.012                | 0.033<br>±0.011  | 0.030<br>±0.013 | 0.064<br>± 0.046               | 0.032<br>±0.014  | 0.024<br>±0.011  | 0.026<br>±0.011   | 0.025<br>±0.008                |
|               | Acc.1    | 0.025<br>±0.009 | 0.028<br>±0.012 | 0.033<br>±0.013 | <b>0.053</b><br>± <b>0.036</b> | 0.032<br>±0.013 | 0.030<br>±0.017 | 0.026<br>±0.014  | 0.034<br>±0.017 | 0.026<br>±0.012  | 0.035<br>±0.017                | 0.048<br>±0.024  | 0.028<br>±0.020 | 0.071<br>± 0.066               | 0.037<br>±0.017  | 0.026<br>±0.015  | 0.023<br>±0.013   | 0.037<br>±0.018                |
|               | Acc.2    | 0.055<br>±0.014 | 0.060<br>±0.021 | 0.062<br>±0.019 | <b>0.096</b><br>± <b>0.060</b> | 0.062<br>±0.020 | 0.059<br>±0.025 | 0.057<br>±0.022  | 0.068<br>±0.026 | 0.047<br>±0.017  | 0.067<br>±0.025                | 0.083<br>±0.034  | 0.061<br>±0.027 | 0.124<br>± 0.091               | 0.071<br>±0.024  | 0.050<br>±0.017  | 0.054<br>±0.022   | 0.065<br>±0.019                |
|               |          |                 |                 |                 |                                |                 |                 |                  |                 |                  |                                |                  |                 |                                |                  |                  |                   |                                |
| Subject9_sync | $\kappa$ | 0.005<br>±0.011 | 0.004<br>±0.014 | 0.008<br>±0.017 | 0.014<br>± 0.017               | 0.012<br>±0.015 | 0.004<br>±0.011 | -0.000<br>±0.010 | 0.009<br>±0.018 | -0.001<br>±0.011 | 0.001<br>±0.012                | -0.002<br>±0.010 | 0.007<br>±0.013 | <b>0.012</b><br>± <b>0.026</b> | -0.002<br>±0.008 | -0.000<br>±0.007 | 0.009<br>±0.012   | 0.003<br>±0.009                |
|               | AUC      | 0.534<br>±0.040 | 0.530<br>±0.044 | 0.536<br>±0.044 | 0.566<br>± 0.059               | 0.536<br>±0.052 | 0.522<br>±0.021 | 0.502<br>±0.021  | 0.524<br>±0.032 | 0.512<br>±0.024  | 0.517<br>±0.022                | 0.485<br>±0.021  | 0.513<br>±0.023 | <b>0.545</b><br>± <b>0.080</b> | 0.500<br>±0.018  | 0.505<br>±0.017  | 0.527<br>±0.029   | 0.515<br>±0.026                |
|               | BAcc     | 0.030<br>±0.011 | 0.029<br>±0.014 | 0.033<br>±0.016 | 0.038<br>± 0.017               | 0.037<br>±0.015 | 0.029<br>±0.011 | 0.025<br>±0.010  | 0.033<br>±0.017 | 0.024<br>±0.010  | 0.026<br>±0.011                | 0.023<br>±0.010  | 0.032<br>±0.013 | <b>0.037</b><br>± <b>0.025</b> | 0.023<br>±0.008  | 0.025<br>±0.007  | 0.034<br>±0.012   | 0.028<br>±0.009                |
|               | Acc.1    | 0.030<br>±0.011 | 0.029<br>±0.014 | 0.033<br>±0.016 | 0.038<br>±0.017                | 0.037<br>±0.015 | 0.032<br>±0.016 | 0.024<br>±0.013  | 0.032<br>±0.019 | 0.024<br>±0.013  | 0.028<br>±0.015                | 0.034<br>±0.016  | 0.030<br>±0.015 | 0.045<br>± 0.028               | 0.025<br>±0.007  | 0.035<br>±0.013  | 0.036<br>±0.015   | <b>0.039</b><br>± <b>0.018</b> |
|               | Acc.2    | 0.062<br>±0.018 | 0.062<br>±0.026 | 0.065<br>±0.024 | <b>0.073</b><br>± <b>0.025</b> | 0.067<br>±0.028 | 0.059<br>±0.021 | 0.053<br>±0.016  | 0.060<br>±0.026 | 0.054<br>±0.019  | 0.059<br>±0.021                | 0.065<br>±0.021  | 0.060<br>±0.022 | 0.077<br>± 0.041               | 0.049<br>±0.014  | 0.061<br>±0.014  | 0.069<br>±0.018   | 0.067<br>±0.024                |
|               |          |                 |                 |                 |                                |                 |                 |                  |                 |                  |                                |                  |                 |                                |                  |                  |                   |                                |

## F.2.2 ASYNCHRONOUS DECODING RESULTS

## Within-Subject Evaluation

Table 59: Average ‘‘Self’’ Performance Across All Subjects

| Model (Training strategy) | $\kappa$     | AUC          | BAcc         | Acc.1        | Acc.2        |
|---------------------------|--------------|--------------|--------------|--------------|--------------|
|                           | 0.070        | 0.675        | 0.093        | 0.093        | 0.155        |
| <b>DeepConvnet</b>        | $\pm 0.106$  | $\pm 0.091$  | $\pm 0.103$  | $\pm 0.103$  | $\pm 0.132$  |
|                           | 0.030        | 0.619        | 0.054        | 0.054        | 0.102        |
| <b>EEGNet</b>             | $\pm 0.021$  | $\pm 0.056$  | $\pm 0.020$  | $\pm 0.020$  | $\pm 0.035$  |
|                           | 0.050        | 0.636        | 0.074        | 0.074        | 0.132        |
| <b>Conformer</b>          | $\pm 0.053$  | $\pm 0.071$  | $\pm 0.052$  | $\pm 0.052$  | $\pm 0.074$  |
|                           | 0.164        | 0.745        | 0.185        | 0.185        | 0.277        |
| <b>CTNet</b>              | $\pm 0.176$  | $\pm 0.130$  | $\pm 0.171$  | $\pm 0.171$  | $\pm 0.219$  |
|                           | 0.041        | 0.613        | 0.065        | 0.065        | 0.116        |
| <b>SSVEPDNN</b>           | $\pm 0.031$  | $\pm 0.055$  | $\pm 0.030$  | $\pm 0.030$  | $\pm 0.044$  |
|                           | 0.051        | 0.598        | 0.074        | 0.074        | 0.127        |
| <b>BIOT (f)</b>           | $\pm 0.075$  | $\pm 0.086$  | $\pm 0.073$  | $\pm 0.072$  | $\pm 0.102$  |
|                           | 0.030        | 0.579        | 0.055        | 0.055        | 0.099        |
| <b>BIOT (l)</b>           | $\pm 0.054$  | $\pm 0.081$  | $\pm 0.053$  | $\pm 0.053$  | $\pm 0.079$  |
|                           | 0.035        | 0.586        | 0.059        | 0.059        | 0.106        |
| <b>BENDR (f)</b>          | $\pm 0.025$  | $\pm 0.045$  | $\pm 0.024$  | $\pm 0.024$  | $\pm 0.037$  |
|                           | 0.007        | 0.528        | 0.032        | 0.032        | 0.061        |
| <b>BENDR (l)</b>          | $\pm 0.006$  | $\pm 0.020$  | $\pm 0.005$  | $\pm 0.006$  | $\pm 0.009$  |
|                           | 0.034        | 0.594        | 0.058        | 0.059        | 0.107        |
| <b>CBraMod (f)</b>        | $\pm 0.025$  | $\pm 0.045$  | $\pm 0.025$  | $\pm 0.024$  | $\pm 0.037$  |
|                           | 0.024        | 0.594        | 0.048        | 0.048        | 0.093        |
| <b>CBraMod (l)</b>        | $\pm 0.018$  | $\pm 0.048$  | $\pm 0.017$  | $\pm 0.018$  | $\pm 0.032$  |
|                           | 0.021        | 0.553        | 0.046        | 0.045        | 0.081        |
| <b>EEGPT (f)</b>          | $\pm 0.041$  | $\pm 0.063$  | $\pm 0.040$  | $\pm 0.040$  | $\pm 0.058$  |
|                           | <b>0.136</b> | <b>0.730</b> | <b>0.157</b> | <b>0.157</b> | <b>0.246</b> |
| <b>EEGPT (l)</b>          | $\pm 0.136$  | $\pm 0.124$  | $\pm 0.133$  | $\pm 0.133$  | $\pm 0.177$  |
|                           | 0.073        | 0.620        | 0.096        | 0.096        | 0.160        |
| <b>LaBraM (f)</b>         | $\pm 0.097$  | $\pm 0.080$  | $\pm 0.095$  | $\pm 0.094$  | $\pm 0.117$  |
|                           | 0.012        | 0.548        | 0.036        | 0.036        | 0.070        |
| <b>LaBraM (l)</b>         | $\pm 0.009$  | $\pm 0.030$  | $\pm 0.009$  | $\pm 0.009$  | $\pm 0.015$  |
|                           | 0.075        | 0.630        | 0.099        | 0.099        | 0.167        |
| <b>STEEGformer-s (f)</b>  | $\pm 0.062$  | $\pm 0.076$  | $\pm 0.061$  | $\pm 0.061$  | $\pm 0.091$  |
|                           | 0.023        | 0.589        | 0.048        | 0.047        | 0.088        |
| <b>STEEGformer-s (l)</b>  | $\pm 0.016$  | $\pm 0.048$  | $\pm 0.016$  | $\pm 0.015$  | $\pm 0.024$  |

Table 60: Per-Subject ‘‘Self’’ Performance (trained+tested on same subject)

| Subject         | Metric   | DeepConvnet                 | EEGNet                      | Conformer            | CTNet                       | SSVEPDNN              | BIOT (f)             | BIOT (l)              | BENDR (f)            | BENDR (l)            | CBraMod (f)                 | CBraMod (l)           | EEGPT (f)            | EEGPT (l)            | LaBraM (f)                  | LaBraM (l)            | STEEGformers (f)     | STEEGformers (l)     |
|-----------------|----------|-----------------------------|-----------------------------|----------------------|-----------------------------|-----------------------|----------------------|-----------------------|----------------------|----------------------|-----------------------------|-----------------------|----------------------|----------------------|-----------------------------|-----------------------|----------------------|----------------------|
| Subject10_async | $\kappa$ | 0.052<br>$\pm 0.017$        | 0.033<br>$\pm 0.020$        | 0.027<br>$\pm 0.015$ | 0.062<br>$\pm 0.014$        | 0.022<br>$\pm 0.009$  | 0.019<br>$\pm 0.007$ | 0.007<br>$\pm 0.010$  | 0.034<br>$\pm 0.010$ | 0.005<br>$\pm 0.007$ | 0.021<br>$\pm 0.010$        | 0.022<br>$\pm 0.014$  | 0.012<br>$\pm 0.012$ | 0.033<br>$\pm 0.012$ | <b>0.055</b><br>$\pm 0.021$ | 0.010<br>$\pm 0.009$  | 0.042<br>$\pm 0.023$ | 0.015<br>$\pm 0.012$ |
|                 | AUC      | <b>0.666</b><br>$\pm 0.026$ | 0.607<br>$\pm 0.016$        | 0.623<br>$\pm 0.021$ | 0.668<br>$\pm 0.030$        | 0.585<br>$\pm 0.015$  | 0.567<br>$\pm 0.017$ | 0.549<br>$\pm 0.018$  | 0.568<br>$\pm 0.009$ | 0.521<br>$\pm 0.011$ | 0.572<br>$\pm 0.016$        | 0.586<br>$\pm 0.044$  | 0.537<br>$\pm 0.013$ | 0.617<br>$\pm 0.012$ | 0.606<br>$\pm 0.027$        | 0.542<br>$\pm 0.024$  | 0.612<br>$\pm 0.039$ | 0.592<br>$\pm 0.053$ |
|                 | BAcc     | 0.075<br>$\pm 0.016$        | 0.057<br>$\pm 0.019$        | 0.051<br>$\pm 0.015$ | 0.085<br>$\pm 0.013$        | 0.046<br>$\pm 0.009$  | 0.043<br>$\pm 0.007$ | 0.032<br>$\pm 0.010$  | 0.059<br>$\pm 0.009$ | 0.030<br>$\pm 0.007$ | 0.046<br>$\pm 0.010$        | 0.047<br>$\pm 0.013$  | 0.037<br>$\pm 0.012$ | 0.057<br>$\pm 0.012$ | <b>0.078</b><br>$\pm 0.020$ | 0.035<br>$\pm 0.009$  | 0.066<br>$\pm 0.022$ | 0.040<br>$\pm 0.011$ |
|                 | Acc.1    | 0.075<br>$\pm 0.016$        | 0.057<br>$\pm 0.019$        | 0.051<br>$\pm 0.015$ | 0.085<br>$\pm 0.013$        | 0.046<br>$\pm 0.009$  | 0.043<br>$\pm 0.006$ | 0.032<br>$\pm 0.011$  | 0.058<br>$\pm 0.010$ | 0.029<br>$\pm 0.007$ | 0.045<br>$\pm 0.010$        | 0.046<br>$\pm 0.014$  | 0.037<br>$\pm 0.012$ | 0.058<br>$\pm 0.012$ | <b>0.078</b><br>$\pm 0.021$ | 0.035<br>$\pm 0.009$  | 0.068<br>$\pm 0.024$ | 0.041<br>$\pm 0.010$ |
|                 | Acc.2    | 0.128<br>$\pm 0.035$        | 0.095<br>$\pm 0.025$        | 0.102<br>$\pm 0.017$ | <b>0.140</b><br>$\pm 0.014$ | 0.094<br>$\pm 0.019$  | 0.079<br>$\pm 0.007$ | 0.072<br>$\pm 0.022$  | 0.106<br>$\pm 0.013$ | 0.055<br>$\pm 0.012$ | 0.094<br>$\pm 0.012$        | 0.092<br>$\pm 0.023$  | 0.077<br>$\pm 0.021$ | 0.118<br>$\pm 0.020$ | 0.146<br>$\pm 0.025$        | 0.070<br>$\pm 0.013$  | 0.130<br>$\pm 0.030$ | 0.079<br>$\pm 0.023$ |
|                 |          |                             |                             |                      |                             |                       |                      |                       |                      |                      |                             |                       |                      |                      |                             |                       |                      |                      |
| Subject11_async | $\kappa$ | 0.024<br>$\pm 0.012$        | -0.001<br>$\pm 0.013$       | 0.004<br>$\pm 0.008$ | 0.007<br>$\pm 0.016$        | -0.004<br>$\pm 0.010$ | 0.004<br>$\pm 0.013$ | -0.000<br>$\pm 0.007$ | 0.007<br>$\pm 0.012$ | 0.008<br>$\pm 0.006$ | <b>0.020</b><br>$\pm 0.012$ | 0.004<br>$\pm 0.014$  | 0.005<br>$\pm 0.009$ | 0.010<br>$\pm 0.020$ | 0.010<br>$\pm 0.006$        | -0.002<br>$\pm 0.011$ | 0.005<br>$\pm 0.018$ | 0.011<br>$\pm 0.011$ |
|                 | AUC      | 0.588<br>$\pm 0.034$        | 0.548<br>$\pm 0.017$        | 0.513<br>$\pm 0.021$ | 0.547<br>$\pm 0.045$        | 0.527<br>$\pm 0.021$  | 0.502<br>$\pm 0.031$ | 0.506<br>$\pm 0.032$  | 0.513<br>$\pm 0.022$ | 0.504<br>$\pm 0.008$ | <b>0.549</b><br>$\pm 0.030$ | 0.544<br>$\pm 0.027$  | 0.515<br>$\pm 0.023$ | 0.528<br>$\pm 0.037$ | 0.526<br>$\pm 0.019$        | 0.515<br>$\pm 0.034$  | 0.514<br>$\pm 0.030$ | 0.533<br>$\pm 0.021$ |
|                 | BAcc     | 0.048<br>$\pm 0.012$        | 0.024<br>$\pm 0.012$        | 0.029<br>$\pm 0.008$ | 0.032<br>$\pm 0.015$        | 0.021<br>$\pm 0.010$  | 0.029<br>$\pm 0.012$ | 0.025<br>$\pm 0.007$  | 0.031<br>$\pm 0.012$ | 0.033<br>$\pm 0.006$ | <b>0.045</b><br>$\pm 0.011$ | 0.029<br>$\pm 0.014$  | 0.030<br>$\pm 0.008$ | 0.035<br>$\pm 0.020$ | 0.035<br>$\pm 0.006$        | 0.023<br>$\pm 0.010$  | 0.030<br>$\pm 0.017$ | 0.036<br>$\pm 0.011$ |
|                 | Acc.1    | 0.048<br>$\pm 0.012$        | 0.024<br>$\pm 0.012$        | 0.029<br>$\pm 0.008$ | 0.032<br>$\pm 0.015$        | 0.021<br>$\pm 0.010$  | 0.029<br>$\pm 0.012$ | 0.025<br>$\pm 0.007$  | 0.032<br>$\pm 0.011$ | 0.033<br>$\pm 0.006$ | <b>0.044</b><br>$\pm 0.011$ | 0.029<br>$\pm 0.014$  | 0.029<br>$\pm 0.008$ | 0.035<br>$\pm 0.021$ | 0.035<br>$\pm 0.007$        | 0.022<br>$\pm 0.010$  | 0.029<br>$\pm 0.017$ | 0.036<br>$\pm 0.010$ |
|                 | Acc.2    | 0.083<br>$\pm 0.023$        | 0.064<br>$\pm 0.024$        | 0.058<br>$\pm 0.017$ | 0.066<br>$\pm 0.025$        | 0.057<br>$\pm 0.016$  | 0.054<br>$\pm 0.020$ | 0.045<br>$\pm 0.007$  | 0.057<br>$\pm 0.019$ | 0.055<br>$\pm 0.005$ | <b>0.080</b><br>$\pm 0.020$ | 0.058<br>$\pm 0.022$  | 0.050<br>$\pm 0.006$ | 0.064<br>$\pm 0.024$ | 0.067<br>$\pm 0.015$        | 0.047<br>$\pm 0.010$  | 0.061<br>$\pm 0.032$ | 0.066<br>$\pm 0.017$ |
|                 |          |                             |                             |                      |                             |                       |                      |                       |                      |                      |                             |                       |                      |                      |                             |                       |                      |                      |
| Subject12_async | $\kappa$ | 0.015<br>$\pm 0.013$        | <b>0.019</b><br>$\pm 0.004$ | 0.007<br>$\pm 0.017$ | 0.017<br>$\pm 0.037$        | 0.001<br>$\pm 0.018$  | 0.005<br>$\pm 0.009$ | -0.004<br>$\pm 0.008$ | 0.014<br>$\pm 0.013$ | 0.004<br>$\pm 0.007$ | 0.013<br>$\pm 0.035$        | -0.000<br>$\pm 0.012$ | 0.001<br>$\pm 0.006$ | 0.020<br>$\pm 0.018$ | 0.011<br>$\pm 0.021$        | -0.001<br>$\pm 0.005$ | 0.007<br>$\pm 0.015$ | 0.009<br>$\pm 0.020$ |
|                 | AUC      | <b>0.585</b><br>$\pm 0.030$ | 0.550<br>$\pm 0.043$        | 0.567<br>$\pm 0.022$ | 0.571<br>$\pm 0.035$        | 0.547<br>$\pm 0.018$  | 0.512<br>$\pm 0.023$ | 0.502<br>$\pm 0.031$  | 0.553<br>$\pm 0.011$ | 0.511<br>$\pm 0.020$ | 0.553<br>$\pm 0.024$        | 0.539<br>$\pm 0.030$  | 0.513<br>$\pm 0.024$ | 0.593<br>$\pm 0.032$ | 0.534<br>$\pm 0.038$        | 0.514<br>$\pm 0.027$  | 0.520<br>$\pm 0.035$ | 0.495<br>$\pm 0.034$ |
|                 | BAcc     | 0.040<br>$\pm 0.013$        | <b>0.043</b><br>$\pm 0.004$ | 0.032<br>$\pm 0.016$ | 0.042<br>$\pm 0.036$        | 0.026<br>$\pm 0.017$  | 0.030<br>$\pm 0.009$ | 0.021<br>$\pm 0.008$  | 0.039<br>$\pm 0.012$ | 0.029<br>$\pm 0.007$ | 0.037<br>$\pm 0.034$        | 0.025<br>$\pm 0.011$  | 0.026<br>$\pm 0.006$ | 0.045<br>$\pm 0.017$ | 0.035<br>$\pm 0.020$        | 0.024<br>$\pm 0.005$  | 0.032<br>$\pm 0.014$ | 0.034<br>$\pm 0.020$ |
|                 | Acc.1    | 0.040<br>$\pm 0.013$        | <b>0.043</b><br>$\pm 0.004$ | 0.032<br>$\pm 0.016$ | 0.042<br>$\pm 0.036$        | 0.026<br>$\pm 0.017$  | 0.030<br>$\pm 0.008$ | 0.021<br>$\pm 0.008$  | 0.038<br>$\pm 0.012$ | 0.029<br>$\pm 0.007$ | 0.038<br>$\pm 0.035$        | 0.025<br>$\pm 0.011$  | 0.026<br>$\pm 0.005$ | 0.044<br>$\pm 0.017$ | 0.035<br>$\pm 0.020$        | 0.023<br>$\pm 0.005$  | 0.032<br>$\pm 0.014$ | 0.034<br>$\pm 0.020$ |
|                 | Acc.2    | 0.074<br>$\pm 0.007$        | 0.068<br>$\pm 0.004$        | 0.068<br>$\pm 0.013$ | <b>0.085</b><br>$\pm 0.050$ | 0.062<br>$\pm 0.024$  | 0.056<br>$\pm 0.009$ | 0.048<br>$\pm 0.014$  | 0.076<br>$\pm 0.014$ | 0.053<br>$\pm 0.004$ | 0.071<br>$\pm 0.050$        | 0.050<br>$\pm 0.014$  | 0.049<br>$\pm 0.011$ | 0.084<br>$\pm 0.029$ | 0.067<br>$\pm 0.029$        | 0.053<br>$\pm 0.011$  | 0.052<br>$\pm 0.021$ | 0.064<br>$\pm 0.025$ |
|                 |          |                             |                             |                      |                             |                       |                      |                       |                      |                      |                             |                       |                      |                      |                             |                       |                      |                      |

Continued on next page

| Subject         | Metric   | DeepConvnet          | EEGNet               | Conformer            | CTNet                       | SSVEPDNN             | BIOT (f)              | BIOT (l)             | BENDR (f)            | BENDR (l)             | CBraMod (f)          | CBraMod (l)          | EEGPT (f)             | EEGPT (l)                   | LaBraM (f)           | LaBraM (l)           | STEEGformer-s (f)    | STEEGformer-s (l)     |
|-----------------|----------|----------------------|----------------------|----------------------|-----------------------------|----------------------|-----------------------|----------------------|----------------------|-----------------------|----------------------|----------------------|-----------------------|-----------------------------|----------------------|----------------------|----------------------|-----------------------|
| Subject13_async | $\kappa$ | 0.092<br>$\pm 0.019$ | 0.054<br>$\pm 0.017$ | 0.097<br>$\pm 0.019$ | <b>0.402</b><br>$\pm 0.106$ | 0.062<br>$\pm 0.014$ | 0.039<br>$\pm 0.014$  | 0.014<br>$\pm 0.022$ | 0.082<br>$\pm 0.013$ | 0.018<br>$\pm 0.003$  | 0.106<br>$\pm 0.032$ | 0.007<br>$\pm 0.009$ | 0.022<br>$\pm 0.010$  | 0.411<br>$\pm 0.034$        | 0.075<br>$\pm 0.015$ | 0.018<br>$\pm 0.006$ | 0.131<br>$\pm 0.035$ | 0.065<br>$\pm 0.025$  |
|                 | AUC      | 0.738<br>$\pm 0.019$ | 0.684<br>$\pm 0.026$ | 0.743<br>$\pm 0.043$ | <b>0.897</b><br>$\pm 0.056$ | 0.666<br>$\pm 0.041$ | 0.584<br>$\pm 0.020$  | 0.561<br>$\pm 0.039$ | 0.657<br>$\pm 0.024$ | 0.570<br>$\pm 0.012$  | 0.686<br>$\pm 0.050$ | 0.541<br>$\pm 0.036$ | 0.568<br>$\pm 0.020$  | 0.923<br>$\pm 0.017$        | 0.664<br>$\pm 0.035$ | 0.555<br>$\pm 0.023$ | 0.694<br>$\pm 0.070$ | 0.673<br>$\pm 0.046$  |
|                 | BAcc     | 0.115<br>$\pm 0.018$ | 0.078<br>$\pm 0.016$ | 0.120<br>$\pm 0.019$ | <b>0.417</b><br>$\pm 0.103$ | 0.085<br>$\pm 0.014$ | 0.063<br>$\pm 0.014$  | 0.039<br>$\pm 0.021$ | 0.105<br>$\pm 0.012$ | 0.043<br>$\pm 0.003$  | 0.129<br>$\pm 0.031$ | 0.032<br>$\pm 0.009$ | 0.047<br>$\pm 0.010$  | 0.425<br>$\pm 0.033$        | 0.098<br>$\pm 0.015$ | 0.043<br>$\pm 0.006$ | 0.153<br>$\pm 0.035$ | 0.089<br>$\pm 0.024$  |
|                 | Acc.1    | 0.115<br>$\pm 0.018$ | 0.078<br>$\pm 0.016$ | 0.120<br>$\pm 0.019$ | <b>0.417</b><br>$\pm 0.103$ | 0.085<br>$\pm 0.014$ | 0.063<br>$\pm 0.014$  | 0.038<br>$\pm 0.021$ | 0.106<br>$\pm 0.012$ | 0.043<br>$\pm 0.003$  | 0.128<br>$\pm 0.031$ | 0.031<br>$\pm 0.009$ | 0.048<br>$\pm 0.010$  | 0.427<br>$\pm 0.031$        | 0.098<br>$\pm 0.014$ | 0.043<br>$\pm 0.006$ | 0.153<br>$\pm 0.036$ | 0.088<br>$\pm 0.023$  |
|                 | Acc.2    | 0.206<br>$\pm 0.017$ | 0.151<br>$\pm 0.029$ | 0.214<br>$\pm 0.044$ | <b>0.557</b><br>$\pm 0.105$ | 0.156<br>$\pm 0.019$ | 0.113<br>$\pm 0.024$  | 0.075<br>$\pm 0.021$ | 0.173<br>$\pm 0.024$ | 0.076<br>$\pm 0.010$  | 0.193<br>$\pm 0.038$ | 0.067<br>$\pm 0.025$ | 0.082<br>$\pm 0.017$  | 0.593<br>$\pm 0.038$        | 0.191<br>$\pm 0.026$ | 0.078<br>$\pm 0.012$ | 0.270<br>$\pm 0.067$ | 0.155<br>$\pm 0.035$  |
| Subject14_async | $\kappa$ | 0.055<br>$\pm 0.021$ | 0.037<br>$\pm 0.021$ | 0.049<br>$\pm 0.024$ | 0.335<br>$\pm 0.060$        | 0.047<br>$\pm 0.017$ | 0.055<br>$\pm 0.034$  | 0.020<br>$\pm 0.013$ | 0.054<br>$\pm 0.028$ | 0.014<br>$\pm 0.005$  | 0.021<br>$\pm 0.021$ | 0.028<br>$\pm 0.016$ | 0.026<br>$\pm 0.007$  | <b>0.307</b><br>$\pm 0.038$ | 0.091<br>$\pm 0.043$ | 0.012<br>$\pm 0.011$ | 0.162<br>$\pm 0.065$ | 0.028<br>$\pm 0.021$  |
|                 | AUC      | 0.719<br>$\pm 0.017$ | 0.655<br>$\pm 0.018$ | 0.685<br>$\pm 0.017$ | 0.906<br>$\pm 0.012$        | 0.646<br>$\pm 0.013$ | 0.630<br>$\pm 0.029$  | 0.567<br>$\pm 0.018$ | 0.630<br>$\pm 0.018$ | 0.552<br>$\pm 0.008$  | 0.592<br>$\pm 0.030$ | 0.638<br>$\pm 0.040$ | 0.577<br>$\pm 0.023$  | <b>0.902</b><br>$\pm 0.003$ | 0.688<br>$\pm 0.046$ | 0.582<br>$\pm 0.023$ | 0.706<br>$\pm 0.068$ | 0.667<br>$\pm 0.023$  |
|                 | BAcc     | 0.079<br>$\pm 0.021$ | 0.061<br>$\pm 0.021$ | 0.073<br>$\pm 0.023$ | 0.352<br>$\pm 0.058$        | 0.071<br>$\pm 0.016$ | 0.079<br>$\pm 0.033$  | 0.044<br>$\pm 0.013$ | 0.078<br>$\pm 0.027$ | 0.039<br>$\pm 0.005$  | 0.045<br>$\pm 0.021$ | 0.052<br>$\pm 0.015$ | 0.050<br>$\pm 0.007$  | <b>0.325</b><br>$\pm 0.037$ | 0.114<br>$\pm 0.042$ | 0.036<br>$\pm 0.011$ | 0.183<br>$\pm 0.064$ | 0.052<br>$\pm 0.021$  |
|                 | Acc.1    | 0.079<br>$\pm 0.021$ | 0.061<br>$\pm 0.021$ | 0.073<br>$\pm 0.023$ | 0.352<br>$\pm 0.058$        | 0.071<br>$\pm 0.016$ | 0.078<br>$\pm 0.033$  | 0.044<br>$\pm 0.012$ | 0.078<br>$\pm 0.026$ | 0.039<br>$\pm 0.005$  | 0.045<br>$\pm 0.021$ | 0.054<br>$\pm 0.016$ | 0.049<br>$\pm 0.007$  | <b>0.321</b><br>$\pm 0.037$ | 0.114<br>$\pm 0.043$ | 0.037<br>$\pm 0.012$ | 0.185<br>$\pm 0.066$ | 0.052<br>$\pm 0.020$  |
|                 | Acc.2    | 0.137<br>$\pm 0.042$ | 0.113<br>$\pm 0.027$ | 0.137<br>$\pm 0.029$ | 0.493<br>$\pm 0.068$        | 0.127<br>$\pm 0.019$ | 0.134<br>$\pm 0.035$  | 0.080<br>$\pm 0.019$ | 0.133<br>$\pm 0.028$ | 0.073<br>$\pm 0.008$  | 0.093<br>$\pm 0.023$ | 0.120<br>$\pm 0.023$ | 0.090<br>$\pm 0.009$  | <b>0.476</b><br>$\pm 0.046$ | 0.212<br>$\pm 0.063$ | 0.078<br>$\pm 0.017$ | 0.296<br>$\pm 0.092$ | 0.108<br>$\pm 0.028$  |
| Subject15_async | $\kappa$ | 0.014<br>$\pm 0.033$ | 0.000<br>$\pm 0.008$ | 0.013<br>$\pm 0.020$ | 0.043<br>$\pm 0.025$        | 0.019<br>$\pm 0.016$ | -0.004<br>$\pm 0.005$ | 0.004<br>$\pm 0.008$ | 0.025<br>$\pm 0.015$ | -0.000<br>$\pm 0.005$ | 0.012<br>$\pm 0.019$ | 0.027<br>$\pm 0.023$ | -0.001<br>$\pm 0.008$ | <b>0.039</b><br>$\pm 0.010$ | 0.015<br>$\pm 0.009$ | 0.006<br>$\pm 0.008$ | 0.019<br>$\pm 0.035$ | -0.000<br>$\pm 0.014$ |
|                 | AUC      | 0.581<br>$\pm 0.040$ | 0.540<br>$\pm 0.022$ | 0.562<br>$\pm 0.027$ | <b>0.641</b><br>$\pm 0.033$ | 0.584<br>$\pm 0.023$ | 0.526<br>$\pm 0.026$  | 0.507<br>$\pm 0.031$ | 0.569<br>$\pm 0.028$ | 0.510<br>$\pm 0.014$  | 0.543<br>$\pm 0.047$ | 0.557<br>$\pm 0.032$ | 0.501<br>$\pm 0.016$  | 0.656<br>$\pm 0.037$        | 0.533<br>$\pm 0.020$ | 0.539<br>$\pm 0.040$ | 0.587<br>$\pm 0.031$ | 0.540<br>$\pm 0.024$  |
|                 | BAcc     | 0.039<br>$\pm 0.032$ | 0.025<br>$\pm 0.008$ | 0.037<br>$\pm 0.020$ | 0.067<br>$\pm 0.025$        | 0.043<br>$\pm 0.015$ | 0.021<br>$\pm 0.005$  | 0.029<br>$\pm 0.007$ | 0.050<br>$\pm 0.014$ | 0.025<br>$\pm 0.005$  | 0.037<br>$\pm 0.018$ | 0.051<br>$\pm 0.022$ | 0.024<br>$\pm 0.007$  | <b>0.063</b><br>$\pm 0.009$ | 0.040<br>$\pm 0.009$ | 0.031<br>$\pm 0.008$ | 0.044<br>$\pm 0.034$ | 0.025<br>$\pm 0.014$  |
|                 | Acc.1    | 0.039<br>$\pm 0.032$ | 0.025<br>$\pm 0.008$ | 0.037<br>$\pm 0.020$ | 0.067<br>$\pm 0.025$        | 0.043<br>$\pm 0.015$ | 0.021<br>$\pm 0.005$  | 0.029<br>$\pm 0.007$ | 0.049<br>$\pm 0.016$ | 0.025<br>$\pm 0.005$  | 0.036<br>$\pm 0.018$ | 0.051<br>$\pm 0.021$ | 0.024<br>$\pm 0.007$  | <b>0.062</b><br>$\pm 0.010$ | 0.041<br>$\pm 0.008$ | 0.031<br>$\pm 0.008$ | 0.043<br>$\pm 0.033$ | 0.024<br>$\pm 0.014$  |
|                 | Acc.2    | 0.081<br>$\pm 0.041$ | 0.046<br>$\pm 0.009$ | 0.072<br>$\pm 0.023$ | <b>0.113</b><br>$\pm 0.030$ | 0.085<br>$\pm 0.019$ | 0.046<br>$\pm 0.006$  | 0.055<br>$\pm 0.015$ | 0.090<br>$\pm 0.022$ | 0.053<br>$\pm 0.011$  | 0.074<br>$\pm 0.027$ | 0.088<br>$\pm 0.024$ | 0.047<br>$\pm 0.011$  | 0.122<br>$\pm 0.022$        | 0.072<br>$\pm 0.019$ | 0.055<br>$\pm 0.014$ | 0.093<br>$\pm 0.043$ | 0.050<br>$\pm 0.014$  |
| Subject16_async | $\kappa$ | 0.044<br>$\pm 0.010$ | 0.022<br>$\pm 0.015$ | 0.038<br>$\pm 0.015$ | 0.088<br>$\pm 0.039$        | 0.028<br>$\pm 0.020$ | 0.012<br>$\pm 0.012$  | 0.012<br>$\pm 0.011$ | 0.027<br>$\pm 0.018$ | 0.002<br>$\pm 0.012$  | 0.036<br>$\pm 0.005$ | 0.021<br>$\pm 0.007$ | 0.008<br>$\pm 0.011$  | <b>0.054</b><br>$\pm 0.017$ | 0.049<br>$\pm 0.014$ | 0.002<br>$\pm 0.012$ | 0.044<br>$\pm 0.040$ | 0.011<br>$\pm 0.009$  |

Continued on next page



| Subject         | Metric   | DeepConvnet          | EEGNet               | Conformer            | CTNet                | SSVEPDNN             | BIOT <sup>(f)</sup>  | BIOT <sup>(l)</sup>  | BENDR <sup>(f)</sup> | BENDR <sup>(l)</sup> | CBraMod <sup>(f)</sup> | CBraMod <sup>(l)</sup> | EEGPT <sup>(f)</sup>  | EEGPT <sup>(l)</sup> | LaBraM <sup>(l)</sup> | LaBraM <sup>(l)</sup> | STEEGformer-s <sup>(f)</sup> | STEEGformer-s <sup>(l)</sup> |
|-----------------|----------|----------------------|----------------------|----------------------|----------------------|----------------------|----------------------|----------------------|----------------------|----------------------|------------------------|------------------------|-----------------------|----------------------|-----------------------|-----------------------|------------------------------|------------------------------|
| Subject17_async | $\kappa$ | 0.631<br>$\pm 0.019$ | 0.602<br>$\pm 0.019$ | 0.603<br>$\pm 0.040$ | 0.675<br>$\pm 0.041$ | 0.609<br>$\pm 0.029$ | 0.565<br>$\pm 0.024$ | 0.549<br>$\pm 0.032$ | 0.576<br>$\pm 0.024$ | 0.524<br>$\pm 0.021$ | 0.600<br>$\pm 0.034$   | 0.581<br>$\pm 0.025$   | 0.528<br>$\pm 0.018$  | 0.624<br>$\pm 0.022$ | 0.576<br>$\pm 0.022$  | 0.509<br>$\pm 0.018$  | 0.600<br>$\pm 0.035$         | 0.558<br>$\pm 0.038$         |
|                 | BAcc     | 0.068<br>$\pm 0.009$ | 0.047<br>$\pm 0.014$ | 0.062<br>$\pm 0.014$ | 0.111<br>$\pm 0.038$ | 0.053<br>$\pm 0.020$ | 0.036<br>$\pm 0.011$ | 0.036<br>$\pm 0.011$ | 0.051<br>$\pm 0.017$ | 0.027<br>$\pm 0.012$ | 0.060<br>$\pm 0.005$   | 0.045<br>$\pm 0.007$   | 0.033<br>$\pm 0.011$  | 0.078<br>$\pm 0.016$ | 0.073<br>$\pm 0.014$  | 0.027<br>$\pm 0.011$  | 0.068<br>$\pm 0.039$         | 0.035<br>$\pm 0.009$         |
|                 | Acc.1    | 0.068<br>$\pm 0.009$ | 0.047<br>$\pm 0.014$ | 0.062<br>$\pm 0.014$ | 0.111<br>$\pm 0.038$ | 0.053<br>$\pm 0.020$ | 0.036<br>$\pm 0.011$ | 0.037<br>$\pm 0.010$ | 0.052<br>$\pm 0.018$ | 0.027<br>$\pm 0.012$ | 0.061<br>$\pm 0.009$   | 0.045<br>$\pm 0.007$   | 0.033<br>$\pm 0.011$  | 0.077<br>$\pm 0.017$ | 0.073<br>$\pm 0.014$  | 0.027<br>$\pm 0.012$  | 0.069<br>$\pm 0.037$         | 0.036<br>$\pm 0.009$         |
|                 | Acc.2    | 0.107<br>$\pm 0.010$ | 0.091<br>$\pm 0.011$ | 0.108<br>$\pm 0.026$ | 0.169<br>$\pm 0.056$ | 0.105<br>$\pm 0.029$ | 0.070<br>$\pm 0.020$ | 0.077<br>$\pm 0.020$ | 0.094<br>$\pm 0.027$ | 0.060<br>$\pm 0.019$ | 0.119<br>$\pm 0.007$   | 0.094<br>$\pm 0.012$   | 0.059<br>$\pm 0.019$  | 0.129<br>$\pm 0.019$ | 0.113<br>$\pm 0.014$  | 0.051<br>$\pm 0.020$  | 0.117<br>$\pm 0.038$         | 0.082<br>$\pm 0.021$         |
|                 | $\kappa$ | 0.039<br>$\pm 0.023$ | 0.025<br>$\pm 0.014$ | 0.024<br>$\pm 0.012$ | 0.162<br>$\pm 0.046$ | 0.059<br>$\pm 0.012$ | 0.054<br>$\pm 0.035$ | 0.021<br>$\pm 0.012$ | 0.038<br>$\pm 0.016$ | 0.008<br>$\pm 0.009$ | 0.016<br>$\pm 0.012$   | 0.020<br>$\pm 0.015$   | 0.016<br>$\pm 0.006$  | 0.153<br>$\pm 0.043$ | 0.056<br>$\pm 0.015$  | 0.011<br>$\pm 0.007$  | 0.072<br>$\pm 0.030$         | 0.015<br>$\pm 0.011$         |
|                 | AUC      | 0.650<br>$\pm 0.023$ | 0.602<br>$\pm 0.019$ | 0.575<br>$\pm 0.020$ | 0.794<br>$\pm 0.035$ | 0.623<br>$\pm 0.026$ | 0.599<br>$\pm 0.055$ | 0.588<br>$\pm 0.025$ | 0.580<br>$\pm 0.022$ | 0.519<br>$\pm 0.017$ | 0.581<br>$\pm 0.017$   | 0.566<br>$\pm 0.021$   | 0.532<br>$\pm 0.020$  | 0.798<br>$\pm 0.043$ | 0.624<br>$\pm 0.020$  | 0.568<br>$\pm 0.017$  | 0.665<br>$\pm 0.037$         | 0.565<br>$\pm 0.040$         |
|                 | BAcc     | 0.063<br>$\pm 0.022$ | 0.049<br>$\pm 0.014$ | 0.048<br>$\pm 0.011$ | 0.183<br>$\pm 0.045$ | 0.082<br>$\pm 0.012$ | 0.078<br>$\pm 0.034$ | 0.045<br>$\pm 0.011$ | 0.062<br>$\pm 0.016$ | 0.033<br>$\pm 0.008$ | 0.041<br>$\pm 0.012$   | 0.045<br>$\pm 0.015$   | 0.040<br>$\pm 0.006$  | 0.174<br>$\pm 0.042$ | 0.080<br>$\pm 0.014$  | 0.036<br>$\pm 0.007$  | 0.095<br>$\pm 0.030$         | 0.040<br>$\pm 0.010$         |
|                 | Acc.1    | 0.063<br>$\pm 0.022$ | 0.049<br>$\pm 0.014$ | 0.048<br>$\pm 0.011$ | 0.183<br>$\pm 0.045$ | 0.082<br>$\pm 0.012$ | 0.078<br>$\pm 0.034$ | 0.045<br>$\pm 0.011$ | 0.062<br>$\pm 0.015$ | 0.034<br>$\pm 0.009$ | 0.041<br>$\pm 0.012$   | 0.045<br>$\pm 0.015$   | 0.040<br>$\pm 0.006$  | 0.174<br>$\pm 0.041$ | 0.080<br>$\pm 0.013$  | 0.036<br>$\pm 0.007$  | 0.095<br>$\pm 0.028$         | 0.039<br>$\pm 0.010$         |
|                 | Acc.2    | 0.115<br>$\pm 0.025$ | 0.099<br>$\pm 0.019$ | 0.085<br>$\pm 0.012$ | 0.295<br>$\pm 0.065$ | 0.132<br>$\pm 0.019$ | 0.131<br>$\pm 0.052$ | 0.082<br>$\pm 0.026$ | 0.098<br>$\pm 0.016$ | 0.064<br>$\pm 0.018$ | 0.090<br>$\pm 0.016$   | 0.082<br>$\pm 0.020$   | 0.069<br>$\pm 0.006$  | 0.273<br>$\pm 0.057$ | 0.142<br>$\pm 0.025$  | 0.068<br>$\pm 0.008$  | 0.155<br>$\pm 0.041$         | 0.080<br>$\pm 0.022$         |
|                 | $\kappa$ | 0.117<br>$\pm 0.086$ | 0.011<br>$\pm 0.023$ | 0.026<br>$\pm 0.013$ | 0.293<br>$\pm 0.067$ | 0.068<br>$\pm 0.028$ | 0.163<br>$\pm 0.052$ | 0.048<br>$\pm 0.038$ | 0.020<br>$\pm 0.011$ | 0.005<br>$\pm 0.010$ | 0.021<br>$\pm 0.024$   | 0.037<br>$\pm 0.014$   | 0.011<br>$\pm 0.007$  | 0.088<br>$\pm 0.035$ | 0.077<br>$\pm 0.034$  | 0.013<br>$\pm 0.013$  | 0.083<br>$\pm 0.032$         | 0.026<br>$\pm 0.017$         |
|                 | AUC      | 0.772<br>$\pm 0.107$ | 0.576<br>$\pm 0.024$ | 0.603<br>$\pm 0.013$ | 0.907<br>$\pm 0.023$ | 0.649<br>$\pm 0.029$ | 0.767<br>$\pm 0.049$ | 0.636<br>$\pm 0.067$ | 0.572<br>$\pm 0.020$ | 0.515<br>$\pm 0.010$ | 0.569<br>$\pm 0.043$   | 0.623<br>$\pm 0.042$   | 0.537<br>$\pm 0.015$  | 0.729<br>$\pm 0.036$ | 0.636<br>$\pm 0.055$  | 0.536<br>$\pm 0.026$  | 0.668<br>$\pm 0.050$         | 0.625<br>$\pm 0.043$         |
| Subject18_async | BAcc     | 0.139<br>$\pm 0.084$ | 0.036<br>$\pm 0.022$ | 0.050<br>$\pm 0.013$ | 0.310<br>$\pm 0.065$ | 0.091<br>$\pm 0.028$ | 0.184<br>$\pm 0.051$ | 0.072<br>$\pm 0.037$ | 0.045<br>$\pm 0.011$ | 0.030<br>$\pm 0.010$ | 0.045<br>$\pm 0.023$   | 0.061<br>$\pm 0.014$   | 0.036<br>$\pm 0.007$  | 0.111<br>$\pm 0.034$ | 0.100<br>$\pm 0.033$  | 0.037<br>$\pm 0.013$  | 0.106<br>$\pm 0.031$         | 0.050<br>$\pm 0.017$         |
|                 | Acc.1    | 0.139<br>$\pm 0.084$ | 0.036<br>$\pm 0.022$ | 0.050<br>$\pm 0.013$ | 0.310<br>$\pm 0.065$ | 0.091<br>$\pm 0.028$ | 0.183<br>$\pm 0.050$ | 0.071<br>$\pm 0.037$ | 0.044<br>$\pm 0.011$ | 0.030<br>$\pm 0.010$ | 0.045<br>$\pm 0.023$   | 0.065<br>$\pm 0.015$   | 0.036<br>$\pm 0.007$  | 0.111<br>$\pm 0.034$ | 0.103<br>$\pm 0.034$  | 0.037<br>$\pm 0.013$  | 0.107<br>$\pm 0.029$         | 0.051<br>$\pm 0.017$         |
|                 | Acc.2    | 0.247<br>$\pm 0.131$ | 0.077<br>$\pm 0.034$ | 0.091<br>$\pm 0.022$ | 0.474<br>$\pm 0.078$ | 0.153<br>$\pm 0.033$ | 0.294<br>$\pm 0.072$ | 0.126<br>$\pm 0.048$ | 0.090<br>$\pm 0.025$ | 0.054<br>$\pm 0.017$ | 0.087<br>$\pm 0.028$   | 0.119<br>$\pm 0.035$   | 0.064<br>$\pm 0.011$  | 0.202<br>$\pm 0.045$ | 0.173<br>$\pm 0.050$  | 0.068<br>$\pm 0.019$  | 0.197<br>$\pm 0.045$         | 0.089<br>$\pm 0.014$         |
|                 | $\kappa$ | 0.046<br>$\pm 0.015$ | 0.047<br>$\pm 0.026$ | 0.062<br>$\pm 0.020$ | 0.053<br>$\pm 0.026$ | 0.023<br>$\pm 0.018$ | 0.032<br>$\pm 0.011$ | 0.022<br>$\pm 0.019$ | 0.021<br>$\pm 0.013$ | 0.005<br>$\pm 0.006$ | 0.024<br>$\pm 0.023$   | 0.012<br>$\pm 0.015$   | -0.004<br>$\pm 0.009$ | 0.059<br>$\pm 0.021$ | 0.073<br>$\pm 0.019$  | 0.023<br>$\pm 0.011$  | 0.101<br>$\pm 0.025$         | 0.027<br>$\pm 0.021$         |
|                 | AUC      | 0.733<br>$\pm 0.022$ | 0.682<br>$\pm 0.012$ | 0.685<br>$\pm 0.029$ | 0.746<br>$\pm 0.024$ | 0.599<br>$\pm 0.021$ | 0.590<br>$\pm 0.016$ | 0.537<br>$\pm 0.026$ | 0.575<br>$\pm 0.014$ | 0.528<br>$\pm 0.013$ | 0.609<br>$\pm 0.045$   | 0.594<br>$\pm 0.012$   | 0.503<br>$\pm 0.020$  | 0.698<br>$\pm 0.020$ | 0.654<br>$\pm 0.030$  | 0.536<br>$\pm 0.014$  | 0.685<br>$\pm 0.024$         | 0.637<br>$\pm 0.020$         |

Continued on next page

| Subject         | Metric   | DeepConvnet     | EEGNet          | Conformer       | CTNet                          | SSVEPDNN        | BIOT (f)         | BIOT (l)        | BENDR (f)       | BENDR (l)       | CBraMod (f)     | CBraMod (l)     | EEGPT (f)       | EEGPT (l)                      | LaBraM (f)                     | LaBraM (l)      | STEEGformer-s (f) | STEEGformer-s (l) |
|-----------------|----------|-----------------|-----------------|-----------------|--------------------------------|-----------------|------------------|-----------------|-----------------|-----------------|-----------------|-----------------|-----------------|--------------------------------|--------------------------------|-----------------|-------------------|-------------------|
| Subject1_async  | BAcc     | 0.070<br>±0.015 | 0.071<br>±0.025 | 0.086<br>±0.019 | 0.076<br>±0.026                | 0.048<br>±0.017 | 0.056<br>±0.011  | 0.047<br>±0.019 | 0.045<br>±0.012 | 0.030<br>±0.006 | 0.049<br>±0.022 | 0.037<br>±0.014 | 0.021<br>±0.008 | 0.083<br>±0.020                | <b>0.096</b><br>± <b>0.018</b> | 0.047<br>±0.011 | 0.123<br>± 0.024  | 0.051<br>±0.021   |
|                 |          | 0.070<br>±0.015 | 0.071<br>±0.025 | 0.086<br>±0.019 | 0.076<br>±0.026                | 0.048<br>±0.017 | 0.057<br>±0.013  | 0.047<br>±0.019 | 0.045<br>±0.012 | 0.031<br>±0.006 | 0.049<br>±0.021 | 0.037<br>±0.015 | 0.022<br>±0.008 | 0.082<br>±0.021                | <b>0.095</b><br>± <b>0.018</b> | 0.047<br>±0.010 | 0.121<br>± 0.023  | 0.050<br>±0.021   |
|                 | Acc.1    | 0.143<br>±0.019 | 0.129<br>±0.037 | 0.156<br>±0.022 | 0.152<br>±0.033                | 0.086<br>±0.026 | 0.106<br>±0.025  | 0.080<br>±0.017 | 0.093<br>±0.020 | 0.059<br>±0.012 | 0.085<br>±0.022 | 0.073<br>±0.016 | 0.044<br>±0.011 | 0.138<br>±0.032                | <b>0.170</b><br>± <b>0.023</b> | 0.075<br>±0.016 | 0.222<br>± 0.023  | 0.087<br>±0.026   |
|                 |          | 0.143<br>±0.019 | 0.129<br>±0.037 | 0.156<br>±0.022 | 0.152<br>±0.033                | 0.086<br>±0.026 | 0.106<br>±0.025  | 0.080<br>±0.017 | 0.093<br>±0.020 | 0.059<br>±0.012 | 0.085<br>±0.022 | 0.073<br>±0.016 | 0.044<br>±0.011 | 0.138<br>±0.032                | <b>0.170</b><br>± <b>0.023</b> | 0.075<br>±0.016 | 0.222<br>± 0.023  | 0.087<br>±0.026   |
|                 | $\kappa$ | 0.009<br>±0.018 | 0.011<br>±0.013 | 0.011<br>±0.012 | <b>0.012</b><br>± <b>0.022</b> | 0.011<br>±0.015 | -0.002<br>±0.011 | 0.001<br>±0.011 | 0.007<br>±0.013 | 0.003<br>±0.008 | 0.008<br>±0.016 | 0.008<br>±0.014 | 0.003<br>±0.009 | 0.014<br>± 0.019               | 0.009<br>±0.016                | 0.002<br>±0.009 | 0.005<br>±0.022   | 0.003<br>±0.015   |
|                 |          | 0.562<br>±0.049 | 0.554<br>±0.033 | 0.549<br>±0.033 | 0.583<br>± 0.052               | 0.544<br>±0.033 | 0.514<br>±0.024  | 0.507<br>±0.033 | 0.528<br>±0.026 | 0.508<br>±0.019 | 0.537<br>±0.032 | 0.546<br>±0.039 | 0.510<br>±0.023 | <b>0.567</b><br>± <b>0.039</b> | 0.534<br>±0.037                | 0.509<br>±0.030 | 0.524<br>±0.041   | 0.529<br>±0.046   |
|                 | BAcc     | 0.034<br>±0.017 | 0.036<br>±0.013 | 0.036<br>±0.012 | <b>0.037</b><br>± <b>0.021</b> | 0.036<br>±0.015 | 0.023<br>±0.011  | 0.026<br>±0.011 | 0.032<br>±0.012 | 0.028<br>±0.008 | 0.033<br>±0.016 | 0.033<br>±0.014 | 0.028<br>±0.009 | 0.039<br>± 0.018               | 0.034<br>±0.015                | 0.026<br>±0.009 | 0.030<br>±0.021   | 0.027<br>±0.015   |
|                 |          | 0.034<br>±0.017 | 0.036<br>±0.013 | 0.036<br>±0.012 | <b>0.037</b><br>± <b>0.021</b> | 0.036<br>±0.015 | 0.023<br>±0.011  | 0.026<br>±0.011 | 0.032<br>±0.013 | 0.028<br>±0.008 | 0.033<br>±0.016 | 0.034<br>±0.014 | 0.028<br>±0.009 | 0.038<br>± 0.018               | 0.034<br>±0.015                | 0.026<br>±0.009 | 0.030<br>±0.021   | 0.028<br>±0.015   |
|                 | Acc.1    | 0.066<br>±0.026 | 0.071<br>±0.018 | 0.070<br>±0.019 | 0.072<br>± 0.033               | 0.068<br>±0.020 | 0.050<br>±0.017  | 0.052<br>±0.015 | 0.062<br>±0.018 | 0.053<br>±0.011 | 0.067<br>±0.021 | 0.066<br>±0.024 | 0.054<br>±0.013 | <b>0.072</b><br>± <b>0.023</b> | 0.066<br>±0.026                | 0.053<br>±0.015 | 0.063<br>±0.035   | 0.055<br>±0.017   |
|                 |          | 0.066<br>±0.026 | 0.071<br>±0.018 | 0.070<br>±0.019 | 0.072<br>± 0.033               | 0.068<br>±0.020 | 0.050<br>±0.017  | 0.052<br>±0.015 | 0.062<br>±0.018 | 0.053<br>±0.011 | 0.067<br>±0.021 | 0.066<br>±0.024 | 0.054<br>±0.013 | <b>0.072</b><br>± <b>0.023</b> | 0.066<br>±0.026                | 0.053<br>±0.015 | 0.063<br>±0.035   | 0.055<br>±0.017   |
| Subject20_async | $\kappa$ | 0.043<br>±0.033 | 0.036<br>±0.029 | 0.077<br>±0.015 | 0.295<br>± 0.050               | 0.057<br>±0.021 | 0.055<br>±0.013  | 0.030<br>±0.016 | 0.060<br>±0.019 | 0.009<br>±0.009 | 0.037<br>±0.028 | 0.064<br>±0.022 | 0.031<br>±0.013 | <b>0.252</b><br>± <b>0.025</b> | 0.122<br>±0.037                | 0.011<br>±0.019 | 0.077<br>±0.037   | 0.028<br>±0.032   |
|                 |          | 0.688<br>±0.026 | 0.638<br>±0.025 | 0.705<br>±0.017 | 0.870<br>± 0.022               | 0.669<br>±0.031 | 0.635<br>±0.058  | 0.620<br>±0.030 | 0.619<br>±0.028 | 0.542<br>±0.012 | 0.618<br>±0.023 | 0.657<br>±0.033 | 0.606<br>±0.022 | <b>0.857</b><br>± <b>0.024</b> | 0.685<br>±0.026                | 0.555<br>±0.046 | 0.662<br>±0.030   | 0.623<br>±0.040   |
|                 | BAcc     | 0.067<br>±0.032 | 0.060<br>±0.028 | 0.100<br>±0.015 | 0.313<br>± 0.048               | 0.080<br>±0.020 | 0.079<br>±0.013  | 0.055<br>±0.016 | 0.084<br>±0.019 | 0.034<br>±0.008 | 0.061<br>±0.027 | 0.088<br>±0.021 | 0.055<br>±0.012 | <b>0.271</b><br>± <b>0.025</b> | 0.144<br>±0.036                | 0.035<br>±0.019 | 0.100<br>±0.036   | 0.052<br>±0.031   |
|                 |          | 0.067<br>±0.032 | 0.060<br>±0.028 | 0.100<br>±0.015 | 0.313<br>± 0.048               | 0.080<br>±0.020 | 0.079<br>±0.014  | 0.055<br>±0.016 | 0.083<br>±0.018 | 0.034<br>±0.008 | 0.063<br>±0.028 | 0.088<br>±0.023 | 0.055<br>±0.012 | <b>0.269</b><br>± <b>0.025</b> | 0.144<br>±0.035                | 0.035<br>±0.019 | 0.101<br>±0.038   | 0.051<br>±0.032   |
|                 | Acc.1    | 0.122<br>±0.033 | 0.126<br>±0.052 | 0.202<br>±0.035 | 0.472<br>± 0.065               | 0.146<br>±0.027 | 0.149<br>±0.035  | 0.100<br>±0.022 | 0.129<br>±0.026 | 0.072<br>±0.010 | 0.114<br>±0.045 | 0.147<br>±0.026 | 0.109<br>±0.013 | <b>0.407</b><br>± <b>0.033</b> | 0.230<br>±0.049                | 0.068<br>±0.019 | 0.177<br>±0.046   | 0.099<br>±0.040   |
|                 |          | 0.122<br>±0.033 | 0.126<br>±0.052 | 0.202<br>±0.035 | 0.472<br>± 0.065               | 0.146<br>±0.027 | 0.149<br>±0.035  | 0.100<br>±0.022 | 0.129<br>±0.026 | 0.072<br>±0.010 | 0.114<br>±0.045 | 0.147<br>±0.026 | 0.109<br>±0.013 | <b>0.407</b><br>± <b>0.033</b> | 0.230<br>±0.049                | 0.068<br>±0.019 | 0.177<br>±0.046   | 0.099<br>±0.040   |
| Subject21_async | $\kappa$ | 0.053<br>±0.023 | 0.041<br>±0.011 | 0.062<br>±0.018 | <b>0.226</b><br>± <b>0.043</b> | 0.050<br>±0.027 | 0.031<br>±0.026  | 0.021<br>±0.008 | 0.030<br>±0.012 | 0.008<br>±0.013 | 0.096<br>±0.012 | 0.010<br>±0.024 | 0.012<br>±0.010 | 0.252<br>± 0.022               | 0.034<br>±0.013                | 0.032<br>±0.023 | 0.117<br>±0.037   | 0.042<br>±0.021   |
|                 |          | 0.688<br>±0.026 | 0.665<br>±0.030 | 0.675<br>±0.014 | <b>0.865</b><br>± <b>0.023</b> | 0.633<br>±0.024 | 0.591<br>±0.039  | 0.573<br>±0.013 | 0.585<br>±0.013 | 0.532<br>±0.010 | 0.689<br>±0.029 | 0.619<br>±0.074 | 0.525<br>±0.019 | 0.878<br>± 0.008               | 0.582<br>±0.018                | 0.619<br>±0.023 | 0.668<br>±0.062   | 0.624<br>±0.048   |
|                 | BAcc     | 0.077<br>±0.022 | 0.065<br>±0.010 | 0.085<br>±0.017 | <b>0.245</b><br>± <b>0.042</b> | 0.074<br>±0.026 | 0.055<br>±0.025  | 0.045<br>±0.008 | 0.054<br>±0.011 | 0.033<br>±0.012 | 0.118<br>±0.012 | 0.035<br>±0.024 | 0.037<br>±0.010 | 0.271<br>± 0.022               | 0.059<br>±0.012                | 0.056<br>±0.023 | 0.139<br>±0.036   | 0.066<br>±0.021   |
|                 |          | 0.077<br>±0.022 | 0.065<br>±0.010 | 0.085<br>±0.017 | <b>0.245</b><br>± <b>0.042</b> | 0.074<br>±0.026 | 0.055<br>±0.025  | 0.045<br>±0.008 | 0.054<br>±0.011 | 0.033<br>±0.012 | 0.118<br>±0.012 | 0.035<br>±0.024 | 0.037<br>±0.010 | 0.271<br>± 0.022               | 0.059<br>±0.012                | 0.056<br>±0.023 | 0.139<br>±0.036   | 0.066<br>±0.021   |

Continued on next page

| Subject         | Metric   | DeepConvnet                    | EEGNet          | Conformer       | CTNet                          | SSVEPDNN        | BIOT <sup>(f)</sup> | BIOT <sup>(l)</sup> | BENDR <sup>(f)</sup> | BENDR <sup>(l)</sup> | CBraMod <sup>(f)</sup> | CBraMod <sup>(l)</sup> | EEGPT <sup>(f)</sup> | EEGPT <sup>(l)</sup>           | LaBraM <sup>(f)</sup>          | LaBraM <sup>(l)</sup> | STEEGformer-s <sup>(f)</sup> | STEEGformer-s <sup>(l)</sup> |
|-----------------|----------|--------------------------------|-----------------|-----------------|--------------------------------|-----------------|---------------------|---------------------|----------------------|----------------------|------------------------|------------------------|----------------------|--------------------------------|--------------------------------|-----------------------|------------------------------|------------------------------|
| Subject22_async | Acc.1    | 0.077<br>±0.022                | 0.065<br>±0.010 | 0.085<br>±0.017 | <b>0.245</b><br>± <b>0.042</b> | 0.074<br>±0.026 | 0.055<br>±0.025     | 0.044<br>±0.008     | 0.054<br>±0.011      | 0.033<br>±0.013      | 0.118<br>±0.012        | 0.035<br>±0.023        | 0.037<br>±0.010      | <div>0.269<br/>± 0.022</div>   | 0.059<br>±0.013                | 0.056<br>±0.023       | 0.139<br>±0.037              | 0.065<br>±0.020              |
|                 |          | 0.143<br>±0.035                | 0.125<br>±0.008 | 0.144<br>±0.017 | <b>0.395</b><br>± <b>0.046</b> | 0.120<br>±0.032 | 0.092<br>±0.029     | 0.082<br>±0.011     | 0.093<br>±0.014      | 0.069<br>±0.014      | 0.187<br>±0.033        | 0.065<br>±0.024        | 0.059<br>±0.008      | <div>0.412<br/>± 0.016</div>   | 0.107<br>±0.021                | 0.103<br>±0.017       | 0.226<br>±0.052              | 0.112<br>±0.034              |
|                 | $\kappa$ | 0.072<br>±0.026                | 0.048<br>±0.030 | 0.049<br>±0.015 | <div>0.508<br/>± 0.036</div>   | 0.051<br>±0.007 | 0.143<br>±0.049     | 0.107<br>±0.066     | 0.051<br>±0.016      | 0.007<br>±0.011      | 0.048<br>±0.007        | 0.023<br>±0.003        | 0.034<br>±0.022      | <b>0.326</b><br>± <b>0.037</b> | 0.105<br>±0.043                | 0.017<br>±0.002       | 0.130<br>±0.040              | 0.024<br>±0.027              |
|                 |          | 0.716<br>±0.014                | 0.683<br>±0.041 | 0.678<br>±0.011 | <div>0.955<br/>± 0.015</div>   | 0.676<br>±0.016 | 0.697<br>±0.082     | 0.714<br>±0.093     | 0.626<br>±0.033      | 0.553<br>±0.016      | 0.613<br>±0.026        | 0.637<br>±0.017        | 0.607<br>±0.034      | <b>0.917</b><br>± <b>0.003</b> | 0.689<br>±0.041                | 0.581<br>±0.021       | 0.682<br>±0.049              | 0.655<br>±0.027              |
|                 | BAcc     | 0.095<br>±0.025                | 0.072<br>±0.029 | 0.073<br>±0.015 | <div>0.520<br/>± 0.035</div>   | 0.075<br>±0.007 | 0.164<br>±0.047     | 0.129<br>±0.064     | 0.075<br>±0.016      | 0.032<br>±0.011      | 0.072<br>±0.007        | 0.047<br>±0.003        | 0.058<br>±0.021      | <b>0.343</b><br>± <b>0.036</b> | 0.128<br>±0.042                | 0.041<br>±0.002       | 0.151<br>±0.039              | 0.048<br>±0.026              |
|                 |          | 0.095<br>±0.025                | 0.072<br>±0.029 | 0.073<br>±0.015 | <div>0.520<br/>± 0.035</div>   | 0.075<br>±0.007 | 0.164<br>±0.047     | 0.129<br>±0.063     | 0.076<br>±0.015      | 0.032<br>±0.011      | 0.072<br>±0.008        | 0.048<br>±0.003        | 0.058<br>±0.022      | <b>0.345</b><br>± <b>0.037</b> | 0.127<br>±0.042                | 0.041<br>±0.003       | 0.152<br>±0.039              | 0.048<br>±0.026              |
| Subject23_async | Acc.1    | 0.180<br>±0.047                | 0.132<br>±0.035 | 0.131<br>±0.013 | <div>0.681<br/>± 0.046</div>   | 0.152<br>±0.015 | 0.250<br>±0.081     | 0.210<br>±0.096     | 0.144<br>±0.012      | 0.066<br>±0.017      | 0.121<br>±0.011        | 0.097<br>±0.023        | 0.113<br>±0.035      | <b>0.521</b><br>± <b>0.047</b> | 0.224<br>±0.056                | 0.085<br>±0.004       | 0.224<br>±0.052              | 0.099<br>±0.038              |
|                 |          | 0.030<br>±0.027                | 0.016<br>±0.008 | 0.024<br>±0.013 | 0.033<br>±0.028                | 0.024<br>±0.012 | 0.026<br>±0.021     | 0.002<br>±0.013     | 0.009<br>±0.015      | 0.009<br>±0.009      | 0.008<br>±0.012        | 0.023<br>±0.013        | 0.003<br>±0.006      | 0.034<br>±0.007                | <b>0.039</b><br>± <b>0.012</b> | 0.001<br>±0.008       | <div>0.053<br/>± 0.038</div> | 0.035<br>±0.018              |
|                 | AUC      | <b>0.641</b><br>± <b>0.024</b> | 0.607<br>±0.013 | 0.604<br>±0.017 | <div>0.647<br/>± 0.028</div>   | 0.552<br>±0.017 | 0.564<br>±0.029     | 0.534<br>±0.017     | 0.562<br>±0.018      | 0.527<br>±0.007      | 0.541<br>±0.034        | 0.565<br>±0.013        | 0.516<br>±0.020      | 0.637<br>±0.029                | 0.576<br>±0.033                | 0.545<br>±0.020       | 0.587<br>±0.058              | 0.590<br>±0.055              |
|                 |          | 0.055<br>±0.026                | 0.041<br>±0.008 | 0.048<br>±0.013 | 0.057<br>±0.027                | 0.049<br>±0.012 | 0.050<br>±0.021     | 0.027<br>±0.013     | 0.034<br>±0.015      | 0.034<br>±0.009      | 0.033<br>±0.011        | 0.048<br>±0.012        | 0.028<br>±0.005      | 0.059<br>±0.007                | <b>0.063</b><br>± <b>0.012</b> | 0.026<br>±0.008       | <div>0.076<br/>± 0.037</div> | 0.059<br>±0.017              |
|                 | Acc.1    | 0.055<br>±0.026                | 0.041<br>±0.008 | 0.048<br>±0.013 | 0.057<br>±0.027                | 0.049<br>±0.012 | 0.050<br>±0.020     | 0.027<br>±0.013     | 0.034<br>±0.015      | 0.034<br>±0.009      | 0.033<br>±0.012        | 0.048<br>±0.013        | 0.028<br>±0.005      | 0.058<br>±0.007                | <b>0.062</b><br>± <b>0.012</b> | 0.026<br>±0.008       | <div>0.075<br/>± 0.037</div> | 0.058<br>±0.017              |
|                 |          | 0.102<br>±0.028                | 0.083<br>±0.019 | 0.099<br>±0.021 | <b>0.107</b><br>± <b>0.032</b> | 0.086<br>±0.014 | 0.102<br>±0.026     | 0.055<br>±0.018     | 0.069<br>±0.028      | 0.065<br>±0.013      | 0.063<br>±0.014        | 0.088<br>±0.015        | 0.053<br>±0.015      | 0.103<br>±0.012                | 0.105<br>±0.021                | 0.065<br>±0.006       | <div>0.135<br/>± 0.058</div> | 0.099<br>±0.023              |
| Subject24_async | $\kappa$ | 0.014<br>±0.022                | 0.001<br>±0.013 | 0.027<br>±0.017 | <div>0.119<br/>± 0.041</div>   | 0.021<br>±0.015 | 0.034<br>±0.010     | 0.005<br>±0.007     | 0.014<br>±0.007      | 0.001<br>±0.005      | 0.019<br>±0.016        | 0.033<br>±0.014        | 0.007<br>±0.015      | <b>0.079</b><br>± <b>0.032</b> | 0.046<br>±0.015                | 0.007<br>±0.006       | 0.072<br>±0.031              | 0.040<br>±0.031              |
|                 |          | 0.596<br>±0.024                | 0.551<br>±0.041 | 0.579<br>±0.041 | <b>0.716</b><br>± <b>0.047</b> | 0.557<br>±0.017 | 0.597<br>±0.020     | 0.550<br>±0.044     | 0.542<br>±0.030      | 0.509<br>±0.020      | 0.562<br>±0.018        | 0.585<br>±0.025        | 0.532<br>±0.020      | <div>0.722<br/>± 0.034</div>   | 0.604<br>±0.029                | 0.536<br>±0.016       | 0.633<br>±0.036              | 0.601<br>±0.029              |
|                 | BAcc     | 0.039<br>±0.022                | 0.026<br>±0.012 | 0.051<br>±0.017 | <div>0.141<br/>± 0.040</div>   | 0.045<br>±0.014 | 0.058<br>±0.009     | 0.030<br>±0.007     | 0.039<br>±0.007      | 0.026<br>±0.005      | 0.044<br>±0.015        | 0.057<br>±0.014        | 0.032<br>±0.014      | <b>0.102</b><br>± <b>0.031</b> | 0.070<br>±0.014                | 0.032<br>±0.006       | 0.095<br>±0.030              | 0.064<br>±0.030              |
|                 |          | 0.039<br>±0.022                | 0.026<br>±0.012 | 0.051<br>±0.017 | <div>0.141<br/>± 0.040</div>   | 0.045<br>±0.014 | 0.057<br>±0.009     | 0.030<br>±0.007     | 0.040<br>±0.008      | 0.027<br>±0.006      | 0.045<br>±0.015        | 0.060<br>±0.013        | 0.032<br>±0.015      | <b>0.106</b><br>± <b>0.034</b> | 0.072<br>±0.016                | 0.032<br>±0.005       | 0.098<br>±0.031              | 0.064<br>±0.030              |
|                 | Acc.1    | 0.039<br>±0.022                | 0.026<br>±0.012 | 0.051<br>±0.017 | <div>0.141<br/>± 0.040</div>   | 0.045<br>±0.014 | 0.057<br>±0.009     | 0.030<br>±0.007     | 0.040<br>±0.008      | 0.027<br>±0.006      | 0.045<br>±0.015        | 0.060<br>±0.013        | 0.032<br>±0.015      | <b>0.106</b><br>± <b>0.034</b> | 0.072<br>±0.016                | 0.032<br>±0.005       | 0.098<br>±0.031              | 0.064<br>±0.030              |
|                 |          | 0.039<br>±0.022                | 0.026<br>±0.012 | 0.051<br>±0.017 | <div>0.141<br/>± 0.040</div>   | 0.045<br>±0.014 | 0.057<br>±0.009     | 0.030<br>±0.007     | 0.040<br>±0.008      | 0.027<br>±0.006      | 0.045<br>±0.015        | 0.060<br>±0.013        | 0.032<br>±0.015      | <b>0.106</b><br>± <b>0.034</b> | 0.072<br>±0.016                | 0.032<br>±0.005       | 0.098<br>±0.031              | 0.064<br>±0.030              |

Continued on next page

| Subject         | Metric   | DeepConvnet     | EEGNet          | Conformer                      | CTNet                          | SSVEPDNN        | BIOT (f)        | BIOT (l)         | BENDR (f)       | BENDR (l)       | CBraMod (f)     | CBraMod (l)     | EEGPT (f)       | EEGPT (l)                      | LaBraM (f)                     | LaBraM (l)      | STEEGformer-s (f) | STEEGformer-s (l) |
|-----------------|----------|-----------------|-----------------|--------------------------------|--------------------------------|-----------------|-----------------|------------------|-----------------|-----------------|-----------------|-----------------|-----------------|--------------------------------|--------------------------------|-----------------|-------------------|-------------------|
|                 | Acc.2    | 0.076<br>±0.034 | 0.053<br>±0.026 | 0.090<br>±0.030                | 0.220<br>±0.048                | 0.082<br>±0.018 | 0.106<br>±0.024 | 0.066<br>±0.012  | 0.073<br>±0.019 | 0.047<br>±0.008 | 0.092<br>±0.014 | 0.110<br>±0.007 | 0.062<br>±0.019 | <b>0.187</b><br>± <b>0.053</b> | 0.134<br>±0.018                | 0.062<br>±0.006 | 0.167<br>±0.054   | 0.105<br>±0.032   |
| Subject25_async | $\kappa$ | 0.076<br>±0.031 | 0.093<br>±0.020 | 0.111<br>±0.026                | 0.069<br>±0.035                | 0.093<br>±0.024 | 0.072<br>±0.021 | 0.054<br>±0.010  | 0.096<br>±0.034 | 0.021<br>±0.012 | 0.110<br>±0.037 | 0.077<br>±0.025 | 0.034<br>±0.014 | 0.080<br>±0.025                | <b>0.117</b><br>± <b>0.029</b> | 0.029<br>±0.013 | 0.139<br>±0.028   | 0.047<br>±0.022   |
|                 | AUC      | 0.760<br>±0.014 | 0.776<br>±0.035 | <b>0.775</b><br>± <b>0.023</b> | 0.742<br>±0.023                | 0.724<br>±0.028 | 0.660<br>±0.031 | 0.677<br>±0.037  | 0.671<br>±0.025 | 0.574<br>±0.017 | 0.729<br>±0.019 | 0.722<br>±0.025 | 0.637<br>±0.015 | 0.774<br>±0.038                | 0.694<br>±0.037                | 0.618<br>±0.055 | 0.723<br>±0.033   | 0.678<br>±0.037   |
|                 | BAcc     | 0.099<br>±0.030 | 0.115<br>±0.020 | 0.133<br>±0.025                | 0.092<br>±0.034                | 0.115<br>±0.024 | 0.095<br>±0.020 | 0.078<br>±0.010  | 0.119<br>±0.033 | 0.045<br>±0.012 | 0.132<br>±0.036 | 0.100<br>±0.024 | 0.058<br>±0.014 | 0.103<br>±0.024                | <b>0.140</b><br>± <b>0.028</b> | 0.053<br>±0.013 | 0.160<br>±0.027   | 0.071<br>±0.021   |
|                 | Acc.1    | 0.099<br>±0.030 | 0.115<br>±0.020 | 0.133<br>±0.025                | 0.092<br>±0.034                | 0.115<br>±0.024 | 0.094<br>±0.020 | 0.078<br>±0.008  | 0.120<br>±0.034 | 0.045<br>±0.012 | 0.132<br>±0.036 | 0.104<br>±0.026 | 0.057<br>±0.014 | 0.104<br>±0.024                | <b>0.141</b><br>± <b>0.028</b> | 0.053<br>±0.013 | 0.160<br>±0.028   | 0.071<br>±0.021   |
|                 | Acc.2    | 0.173<br>±0.026 | 0.207<br>±0.033 | <b>0.238</b><br>± <b>0.016</b> | 0.181<br>±0.049                | 0.195<br>±0.027 | 0.162<br>±0.031 | 0.146<br>±0.023  | 0.197<br>±0.045 | 0.082<br>±0.018 | 0.236<br>±0.039 | 0.197<br>±0.033 | 0.113<br>±0.014 | 0.205<br>±0.039                | 0.230<br>±0.041                | 0.108<br>±0.024 | 0.288<br>±0.034   | 0.133<br>±0.022   |
|                 | $\kappa$ | 0.073<br>±0.045 | 0.039<br>±0.035 | 0.046<br>±0.032                | 0.175<br>±0.020                | 0.068<br>±0.016 | 0.058<br>±0.054 | 0.045<br>±0.015  | 0.035<br>±0.020 | 0.008<br>±0.002 | 0.044<br>±0.030 | 0.033<br>±0.026 | 0.010<br>±0.009 | <b>0.086</b><br>± <b>0.031</b> | 0.069<br>±0.033                | 0.014<br>±0.010 | 0.079<br>±0.014   | 0.005<br>±0.013   |
| Subject26_async | AUC      | 0.698<br>±0.061 | 0.647<br>±0.049 | 0.637<br>±0.026                | 0.830<br>±0.031                | 0.656<br>±0.018 | 0.658<br>±0.037 | 0.651<br>±0.034  | 0.585<br>±0.024 | 0.538<br>±0.014 | 0.608<br>±0.046 | 0.671<br>±0.033 | 0.530<br>±0.031 | <b>0.700</b><br>± <b>0.041</b> | 0.655<br>±0.024                | 0.536<br>±0.023 | 0.656<br>±0.012   | 0.563<br>±0.035   |
|                 | BAcc     | 0.096<br>±0.044 | 0.063<br>±0.034 | 0.070<br>±0.031                | 0.196<br>±0.020                | 0.091<br>±0.016 | 0.082<br>±0.053 | 0.069<br>±0.015  | 0.059<br>±0.019 | 0.033<br>±0.002 | 0.068<br>±0.029 | 0.057<br>±0.025 | 0.035<br>±0.009 | <b>0.109</b><br>± <b>0.031</b> | 0.093<br>±0.032                | 0.039<br>±0.009 | 0.102<br>±0.014   | 0.030<br>±0.013   |
|                 | Acc.1    | 0.096<br>±0.044 | 0.063<br>±0.034 | 0.070<br>±0.031                | 0.196<br>±0.020                | 0.091<br>±0.016 | 0.081<br>±0.052 | 0.069<br>±0.014  | 0.059<br>±0.019 | 0.033<br>±0.002 | 0.069<br>±0.031 | 0.057<br>±0.026 | 0.034<br>±0.009 | <b>0.108</b><br>± <b>0.030</b> | 0.092<br>±0.032                | 0.038<br>±0.009 | 0.103<br>±0.014   | 0.029<br>±0.013   |
|                 | Acc.2    | 0.157<br>±0.058 | 0.115<br>±0.040 | 0.135<br>±0.031                | 0.319<br>±0.042                | 0.163<br>±0.031 | 0.136<br>±0.068 | 0.131<br>±0.026  | 0.098<br>±0.027 | 0.065<br>±0.004 | 0.117<br>±0.042 | 0.115<br>±0.033 | 0.062<br>±0.016 | <b>0.176</b><br>± <b>0.043</b> | 0.157<br>±0.038                | 0.071<br>±0.017 | 0.160<br>±0.027   | 0.065<br>±0.020   |
|                 | $\kappa$ | 0.033<br>±0.027 | 0.033<br>±0.016 | 0.031<br>±0.023                | <b>0.062</b><br>± <b>0.024</b> | 0.029<br>±0.028 | 0.006<br>±0.010 | -0.002<br>±0.008 | 0.016<br>±0.013 | 0.008<br>±0.010 | 0.026<br>±0.010 | 0.021<br>±0.009 | 0.006<br>±0.006 | 0.049<br>±0.010                | 0.066<br>±0.012                | 0.016<br>±0.006 | 0.043<br>±0.014   | 0.005<br>±0.015   |
|                 | AUC      | 0.641<br>±0.027 | 0.619<br>±0.022 | 0.614<br>±0.013                | 0.675<br>±0.040                | 0.562<br>±0.041 | 0.527<br>±0.034 | 0.510<br>±0.021  | 0.584<br>±0.015 | 0.525<br>±0.018 | 0.591<br>±0.023 | 0.592<br>±0.023 | 0.529<br>±0.018 | <b>0.658</b><br>± <b>0.032</b> | 0.621<br>±0.011                | 0.534<br>±0.022 | 0.581<br>±0.017   | 0.543<br>±0.048   |
| Subject27_async | BAcc     | 0.057<br>±0.026 | 0.057<br>±0.015 | 0.055<br>±0.022                | <b>0.085</b><br>± <b>0.024</b> | 0.054<br>±0.028 | 0.031<br>±0.010 | 0.023<br>±0.008  | 0.040<br>±0.013 | 0.033<br>±0.010 | 0.050<br>±0.009 | 0.045<br>±0.009 | 0.031<br>±0.006 | 0.073<br>±0.010                | 0.090<br>±0.012                | 0.040<br>±0.006 | 0.067<br>±0.014   | 0.030<br>±0.014   |
|                 | Acc.1    | 0.057<br>±0.026 | 0.057<br>±0.015 | 0.055<br>±0.022                | <b>0.085</b><br>± <b>0.024</b> | 0.054<br>±0.028 | 0.031<br>±0.009 | 0.022<br>±0.007  | 0.040<br>±0.012 | 0.033<br>±0.009 | 0.050<br>±0.009 | 0.044<br>±0.009 | 0.031<br>±0.006 | 0.073<br>±0.011                | 0.091<br>±0.012                | 0.040<br>±0.006 | 0.068<br>±0.013   | 0.030<br>±0.014   |
|                 | Acc.2    | 0.111<br>±0.031 | 0.108<br>±0.013 | 0.110<br>±0.030                | <b>0.151</b><br>± <b>0.037</b> | 0.099<br>±0.037 | 0.065<br>±0.012 | 0.048<br>±0.017  | 0.079<br>±0.011 | 0.059<br>±0.008 | 0.106<br>±0.026 | 0.085<br>±0.012 | 0.062<br>±0.009 | 0.129<br>±0.020                | 0.155<br>±0.006                | 0.077<br>±0.012 | 0.124<br>±0.016   | 0.048<br>±0.016   |

Continued on next page

| Subject         | Metric   | DeepConvnet                 | EEGNet                      | Conformer                   | CTNet                       | SSVEPDNN             | BIOT (f)             | BIOT (l)              | BENDR (f)            | BENDR (l)            | CBraMod (f)          | CBraMod (l)          | EEGPT (f)             | EEGPT (l)            | LaBraM (f)                  | LaBraM (l)           | STEEGformer-s (f)           | STEEGformer-s (l)    |
|-----------------|----------|-----------------------------|-----------------------------|-----------------------------|-----------------------------|----------------------|----------------------|-----------------------|----------------------|----------------------|----------------------|----------------------|-----------------------|----------------------|-----------------------------|----------------------|-----------------------------|----------------------|
| Subject28_async | $\kappa$ | 0.068<br>$\pm 0.020$        | 0.031<br>$\pm 0.013$        | <b>0.055</b><br>$\pm 0.018$ | 0.024<br>$\pm 0.017$        | 0.038<br>$\pm 0.015$ | 0.025<br>$\pm 0.017$ | 0.018<br>$\pm 0.018$  | 0.024<br>$\pm 0.021$ | 0.006<br>$\pm 0.004$ | 0.041<br>$\pm 0.021$ | 0.023<br>$\pm 0.026$ | 0.006<br>$\pm 0.009$  | 0.011<br>$\pm 0.007$ | 0.023<br>$\pm 0.019$        | 0.018<br>$\pm 0.016$ | 0.021<br>$\pm 0.009$        | 0.004<br>$\pm 0.027$ |
|                 | AUC      | 0.692<br>$\pm 0.034$        | 0.633<br>$\pm 0.036$        | <b>0.657</b><br>$\pm 0.036$ | 0.643<br>$\pm 0.033$        | 0.613<br>$\pm 0.024$ | 0.549<br>$\pm 0.028$ | 0.557<br>$\pm 0.035$  | 0.574<br>$\pm 0.025$ | 0.507<br>$\pm 0.013$ | 0.577<br>$\pm 0.024$ | 0.587<br>$\pm 0.034$ | 0.517<br>$\pm 0.017$  | 0.585<br>$\pm 0.010$ | 0.548<br>$\pm 0.029$        | 0.581<br>$\pm 0.044$ | 0.569<br>$\pm 0.024$        | 0.622<br>$\pm 0.040$ |
|                 | BAcc     | 0.091<br>$\pm 0.020$        | 0.055<br>$\pm 0.013$        | <b>0.078</b><br>$\pm 0.017$ | 0.048<br>$\pm 0.016$        | 0.062<br>$\pm 0.014$ | 0.050<br>$\pm 0.016$ | 0.043<br>$\pm 0.017$  | 0.048<br>$\pm 0.020$ | 0.030<br>$\pm 0.003$ | 0.065<br>$\pm 0.021$ | 0.047<br>$\pm 0.025$ | 0.031<br>$\pm 0.008$  | 0.035<br>$\pm 0.007$ | 0.048<br>$\pm 0.019$        | 0.043<br>$\pm 0.016$ | 0.045<br>$\pm 0.008$        | 0.029<br>$\pm 0.026$ |
|                 | Acc.1    | 0.091<br>$\pm 0.020$        | 0.055<br>$\pm 0.013$        | <b>0.078</b><br>$\pm 0.017$ | 0.048<br>$\pm 0.016$        | 0.062<br>$\pm 0.014$ | 0.050<br>$\pm 0.017$ | 0.042<br>$\pm 0.017$  | 0.048<br>$\pm 0.020$ | 0.031<br>$\pm 0.004$ | 0.068<br>$\pm 0.021$ | 0.048<br>$\pm 0.024$ | 0.031<br>$\pm 0.009$  | 0.035<br>$\pm 0.007$ | 0.050<br>$\pm 0.021$        | 0.045<br>$\pm 0.017$ | 0.045<br>$\pm 0.008$        | 0.029<br>$\pm 0.027$ |
|                 | Acc.2    | 0.152<br>$\pm 0.023$        | 0.110<br>$\pm 0.020$        | <b>0.130</b><br>$\pm 0.014$ | 0.087<br>$\pm 0.029$        | 0.111<br>$\pm 0.016$ | 0.088<br>$\pm 0.024$ | 0.083<br>$\pm 0.022$  | 0.092<br>$\pm 0.025$ | 0.064<br>$\pm 0.010$ | 0.111<br>$\pm 0.012$ | 0.089<br>$\pm 0.027$ | 0.053<br>$\pm 0.012$  | 0.070<br>$\pm 0.010$ | 0.102<br>$\pm 0.011$        | 0.095<br>$\pm 0.026$ | 0.096<br>$\pm 0.022$        | 0.070<br>$\pm 0.043$ |
|                 |          |                             |                             |                             |                             |                      |                      |                       |                      |                      |                      |                      |                       |                      |                             |                      |                             |                      |
| Subject29_async | $\kappa$ | 0.021<br>$\pm 0.017$        | 0.016<br>$\pm 0.016$        | 0.028<br>$\pm 0.025$        | 0.019<br>$\pm 0.019$        | 0.019<br>$\pm 0.017$ | 0.005<br>$\pm 0.015$ | 0.005<br>$\pm 0.010$  | 0.014<br>$\pm 0.011$ | 0.004<br>$\pm 0.010$ | 0.029<br>$\pm 0.012$ | 0.034<br>$\pm 0.014$ | -0.001<br>$\pm 0.004$ | 0.036<br>$\pm 0.011$ | 0.050<br>$\pm 0.026$        | 0.009<br>$\pm 0.010$ | <b>0.049</b><br>$\pm 0.013$ | 0.019<br>$\pm 0.029$ |
|                 | AUC      | 0.569<br>$\pm 0.038$        | 0.560<br>$\pm 0.022$        | 0.577<br>$\pm 0.018$        | 0.563<br>$\pm 0.034$        | 0.546<br>$\pm 0.022$ | 0.518<br>$\pm 0.039$ | 0.511<br>$\pm 0.050$  | 0.552<br>$\pm 0.012$ | 0.502<br>$\pm 0.020$ | 0.568<br>$\pm 0.022$ | 0.573<br>$\pm 0.019$ | 0.511<br>$\pm 0.020$  | 0.615<br>$\pm 0.036$ | <b>0.600</b><br>$\pm 0.034$ | 0.549<br>$\pm 0.029$ | 0.599<br>$\pm 0.063$        | 0.553<br>$\pm 0.047$ |
|                 | BAcc     | 0.045<br>$\pm 0.017$        | 0.040<br>$\pm 0.015$        | 0.052<br>$\pm 0.025$        | 0.043<br>$\pm 0.019$        | 0.044<br>$\pm 0.016$ | 0.030<br>$\pm 0.015$ | 0.030<br>$\pm 0.010$  | 0.038<br>$\pm 0.010$ | 0.029<br>$\pm 0.010$ | 0.054<br>$\pm 0.012$ | 0.058<br>$\pm 0.014$ | 0.024<br>$\pm 0.003$  | 0.060<br>$\pm 0.011$ | 0.074<br>$\pm 0.025$        | 0.034<br>$\pm 0.009$ | <b>0.073</b><br>$\pm 0.012$ | 0.043<br>$\pm 0.029$ |
|                 | Acc.1    | 0.045<br>$\pm 0.017$        | 0.040<br>$\pm 0.015$        | 0.052<br>$\pm 0.025$        | 0.043<br>$\pm 0.019$        | 0.044<br>$\pm 0.016$ | 0.030<br>$\pm 0.014$ | 0.029<br>$\pm 0.010$  | 0.038<br>$\pm 0.011$ | 0.030<br>$\pm 0.011$ | 0.054<br>$\pm 0.012$ | 0.058<br>$\pm 0.013$ | 0.025<br>$\pm 0.004$  | 0.061<br>$\pm 0.011$ | <b>0.074</b><br>$\pm 0.025$ | 0.033<br>$\pm 0.008$ | 0.075<br>$\pm 0.013$        | 0.043<br>$\pm 0.028$ |
|                 | Acc.2    | 0.094<br>$\pm 0.030$        | 0.085<br>$\pm 0.016$        | 0.099<br>$\pm 0.026$        | 0.084<br>$\pm 0.031$        | 0.083<br>$\pm 0.025$ | 0.059<br>$\pm 0.018$ | 0.062<br>$\pm 0.029$  | 0.076<br>$\pm 0.015$ | 0.053<br>$\pm 0.012$ | 0.093<br>$\pm 0.013$ | 0.104<br>$\pm 0.022$ | 0.055<br>$\pm 0.010$  | 0.104<br>$\pm 0.016$ | 0.125<br>$\pm 0.033$        | 0.074<br>$\pm 0.016$ | <b>0.123</b><br>$\pm 0.024$ | 0.078<br>$\pm 0.032$ |
|                 |          |                             |                             |                             |                             |                      |                      |                       |                      |                      |                      |                      |                       |                      |                             |                      |                             |                      |
| Subject2_async  | $\kappa$ | 0.013<br>$\pm 0.016$        | <b>0.015</b><br>$\pm 0.014$ | 0.016<br>$\pm 0.015$        | 0.013<br>$\pm 0.020$        | 0.009<br>$\pm 0.016$ | 0.002<br>$\pm 0.014$ | 0.004<br>$\pm 0.013$  | 0.008<br>$\pm 0.010$ | 0.004<br>$\pm 0.007$ | 0.014<br>$\pm 0.016$ | 0.012<br>$\pm 0.014$ | 0.001<br>$\pm 0.009$  | 0.009<br>$\pm 0.014$ | 0.010<br>$\pm 0.015$        | 0.001<br>$\pm 0.010$ | 0.008<br>$\pm 0.020$        | 0.006<br>$\pm 0.016$ |
|                 | AUC      | <b>0.578</b><br>$\pm 0.041$ | 0.559<br>$\pm 0.031$        | 0.555<br>$\pm 0.027$        | 0.582<br>$\pm 0.044$        | 0.540<br>$\pm 0.036$ | 0.511<br>$\pm 0.035$ | 0.517<br>$\pm 0.030$  | 0.531<br>$\pm 0.029$ | 0.508<br>$\pm 0.015$ | 0.545<br>$\pm 0.035$ | 0.548<br>$\pm 0.033$ | 0.503<br>$\pm 0.019$  | 0.549<br>$\pm 0.033$ | 0.536<br>$\pm 0.029$        | 0.509<br>$\pm 0.027$ | 0.522<br>$\pm 0.042$        | 0.526<br>$\pm 0.042$ |
|                 | BAcc     | 0.037<br>$\pm 0.016$        | <b>0.040</b><br>$\pm 0.014$ | 0.041<br>$\pm 0.015$        | 0.037<br>$\pm 0.020$        | 0.034<br>$\pm 0.015$ | 0.027<br>$\pm 0.013$ | 0.029<br>$\pm 0.013$  | 0.033<br>$\pm 0.010$ | 0.029<br>$\pm 0.007$ | 0.038<br>$\pm 0.015$ | 0.037<br>$\pm 0.014$ | 0.026<br>$\pm 0.009$  | 0.034<br>$\pm 0.014$ | 0.035<br>$\pm 0.015$        | 0.026<br>$\pm 0.010$ | 0.033<br>$\pm 0.019$        | 0.031<br>$\pm 0.016$ |
|                 | Acc.1    | 0.037<br>$\pm 0.016$        | <b>0.040</b><br>$\pm 0.014$ | 0.041<br>$\pm 0.015$        | 0.037<br>$\pm 0.020$        | 0.034<br>$\pm 0.015$ | 0.027<br>$\pm 0.013$ | 0.029<br>$\pm 0.013$  | 0.033<br>$\pm 0.010$ | 0.029<br>$\pm 0.007$ | 0.038<br>$\pm 0.015$ | 0.037<br>$\pm 0.014$ | 0.026<br>$\pm 0.008$  | 0.035<br>$\pm 0.014$ | 0.035<br>$\pm 0.015$        | 0.027<br>$\pm 0.010$ | 0.033<br>$\pm 0.019$        | 0.032<br>$\pm 0.016$ |
|                 | Acc.2    | 0.072<br>$\pm 0.023$        | <b>0.075</b><br>$\pm 0.022$ | 0.077<br>$\pm 0.019$        | 0.071<br>$\pm 0.027$        | 0.067<br>$\pm 0.026$ | 0.057<br>$\pm 0.020$ | 0.057<br>$\pm 0.017$  | 0.063<br>$\pm 0.017$ | 0.055<br>$\pm 0.009$ | 0.071<br>$\pm 0.024$ | 0.070<br>$\pm 0.020$ | 0.051<br>$\pm 0.012$  | 0.068<br>$\pm 0.022$ | 0.071<br>$\pm 0.024$        | 0.052<br>$\pm 0.015$ | 0.062<br>$\pm 0.029$        | 0.058<br>$\pm 0.020$ |
|                 |          |                             |                             |                             |                             |                      |                      |                       |                      |                      |                      |                      |                       |                      |                             |                      |                             |                      |
| Subject30_async | $\kappa$ | 0.031<br>$\pm 0.015$        | 0.031<br>$\pm 0.019$        | 0.030<br>$\pm 0.019$        | <b>0.037</b><br>$\pm 0.012$ | 0.029<br>$\pm 0.007$ | 0.010<br>$\pm 0.011$ | -0.002<br>$\pm 0.008$ | 0.027<br>$\pm 0.011$ | 0.013<br>$\pm 0.009$ | 0.026<br>$\pm 0.007$ | 0.016<br>$\pm 0.017$ | 0.007<br>$\pm 0.007$  | 0.046<br>$\pm 0.016$ | 0.024<br>$\pm 0.022$        | 0.008<br>$\pm 0.012$ | 0.027<br>$\pm 0.011$        | 0.017<br>$\pm 0.019$ |
|                 |          |                             |                             |                             |                             |                      |                      |                       |                      |                      |                      |                      |                       |                      |                             |                      |                             |                      |

Continued on next page

| Subject         | Metric   | DeepConvnet                 | EEGNet               | Conformer            | CTNet                       | SSVEPDNN                    | BIOT <sup>(j)</sup>  | BIOT <sup>(l)</sup>  | BENDR <sup>(f)</sup> | BENDR <sup>(l)</sup> | CBraMod <sup>(f)</sup>      | CBraMod <sup>(l)</sup> | EEGPT <sup>(f)</sup> | EEGPT <sup>(l)</sup>        | LaBraM <sup>(l)</sup> | LaBraM <sup>(l)</sup> | STEEGformer-s <sup>(j)</sup> | STEEGformer-s <sup>(l)</sup> |
|-----------------|----------|-----------------------------|----------------------|----------------------|-----------------------------|-----------------------------|----------------------|----------------------|----------------------|----------------------|-----------------------------|------------------------|----------------------|-----------------------------|-----------------------|-----------------------|------------------------------|------------------------------|
| Subject31_async | AUC      | $\frac{0.640}{\pm 0.017}$   | 0.621<br>$\pm 0.014$ | 0.619<br>$\pm 0.033$ | <b>0.638</b><br>$\pm 0.025$ | 0.597<br>$\pm 0.012$        | 0.535<br>$\pm 0.022$ | 0.500<br>$\pm 0.015$ | 0.571<br>$\pm 0.007$ | 0.546<br>$\pm 0.023$ | 0.555<br>$\pm 0.041$        | 0.571<br>$\pm 0.018$   | 0.518<br>$\pm 0.017$ | 0.625<br>$\pm 0.033$        | 0.558<br>$\pm 0.039$  | 0.511<br>$\pm 0.012$  | 0.537<br>$\pm 0.019$         | 0.541<br>$\pm 0.034$         |
|                 |          | 0.055<br>$\pm 0.014$        | 0.055<br>$\pm 0.019$ | 0.055<br>$\pm 0.019$ | <b>0.061</b><br>$\pm 0.012$ | 0.054<br>$\pm 0.007$        | 0.035<br>$\pm 0.010$ | 0.023<br>$\pm 0.008$ | 0.051<br>$\pm 0.010$ | 0.037<br>$\pm 0.009$ | 0.050<br>$\pm 0.007$        | 0.040<br>$\pm 0.017$   | 0.031<br>$\pm 0.007$ | $\frac{0.070}{\pm 0.015}$   | 0.049<br>$\pm 0.022$  | 0.033<br>$\pm 0.011$  | 0.051<br>$\pm 0.011$         | 0.041<br>$\pm 0.018$         |
|                 | BAcc     | 0.055<br>$\pm 0.014$        | 0.055<br>$\pm 0.019$ | 0.055<br>$\pm 0.019$ | <b>0.061</b><br>$\pm 0.012$ | 0.054<br>$\pm 0.007$        | 0.035<br>$\pm 0.011$ | 0.023<br>$\pm 0.008$ | 0.052<br>$\pm 0.011$ | 0.037<br>$\pm 0.009$ | 0.051<br>$\pm 0.005$        | 0.040<br>$\pm 0.017$   | 0.031<br>$\pm 0.007$ | $\frac{0.069}{\pm 0.016}$   | 0.048<br>$\pm 0.021$  | 0.033<br>$\pm 0.011$  | 0.052<br>$\pm 0.011$         | 0.041<br>$\pm 0.018$         |
|                 |          | 0.096<br>$\pm 0.019$        | 0.098<br>$\pm 0.027$ | 0.101<br>$\pm 0.026$ | 0.102<br>$\pm 0.013$        | <b>0.103</b><br>$\pm 0.013$ | 0.061<br>$\pm 0.005$ | 0.057<br>$\pm 0.012$ | 0.091<br>$\pm 0.007$ | 0.073<br>$\pm 0.009$ | 0.083<br>$\pm 0.015$        | 0.083<br>$\pm 0.021$   | 0.059<br>$\pm 0.011$ | $\frac{0.127}{\pm 0.026}$   | 0.085<br>$\pm 0.029$  | 0.059<br>$\pm 0.014$  | 0.090<br>$\pm 0.014$         | 0.082<br>$\pm 0.039$         |
|                 | $\kappa$ | 0.029<br>$\pm 0.013$        | 0.012<br>$\pm 0.016$ | 0.038<br>$\pm 0.015$ | <b>0.056</b><br>$\pm 0.028$ | 0.031<br>$\pm 0.026$        | 0.018<br>$\pm 0.015$ | 0.008<br>$\pm 0.005$ | 0.034<br>$\pm 0.009$ | 0.006<br>$\pm 0.009$ | <b>0.056</b><br>$\pm 0.017$ | 0.007<br>$\pm 0.008$   | 0.018<br>$\pm 0.009$ | 0.051<br>$\pm 0.019$        | 0.048<br>$\pm 0.009$  | 0.006<br>$\pm 0.006$  | $\frac{0.090}{\pm 0.015}$    | 0.039<br>$\pm 0.020$         |
|                 |          | 0.644<br>$\pm 0.035$        | 0.585<br>$\pm 0.023$ | 0.641<br>$\pm 0.024$ | <b>0.664</b><br>$\pm 0.039$ | 0.602<br>$\pm 0.020$        | 0.580<br>$\pm 0.029$ | 0.548<br>$\pm 0.032$ | 0.602<br>$\pm 0.017$ | 0.541<br>$\pm 0.007$ | 0.624<br>$\pm 0.022$        | 0.528<br>$\pm 0.028$   | 0.546<br>$\pm 0.014$ | $\frac{0.685}{\pm 0.036}$   | 0.600<br>$\pm 0.014$  | 0.540<br>$\pm 0.018$  | 0.631<br>$\pm 0.049$         | 0.595<br>$\pm 0.049$         |
|                 | BAcc     | 0.053<br>$\pm 0.012$        | 0.037<br>$\pm 0.016$ | 0.062<br>$\pm 0.015$ | <b>0.080</b><br>$\pm 0.028$ | 0.055<br>$\pm 0.025$        | 0.043<br>$\pm 0.014$ | 0.033<br>$\pm 0.005$ | 0.058<br>$\pm 0.008$ | 0.030<br>$\pm 0.008$ | <b>0.080</b><br>$\pm 0.017$ | 0.031<br>$\pm 0.008$   | 0.043<br>$\pm 0.009$ | 0.075<br>$\pm 0.018$        | 0.072<br>$\pm 0.008$  | 0.030<br>$\pm 0.006$  | $\frac{0.113}{\pm 0.015}$    | 0.063<br>$\pm 0.019$         |
|                 |          | 0.053<br>$\pm 0.012$        | 0.037<br>$\pm 0.016$ | 0.062<br>$\pm 0.015$ | 0.080<br>$\pm 0.028$        | 0.055<br>$\pm 0.025$        | 0.044<br>$\pm 0.016$ | 0.033<br>$\pm 0.006$ | 0.058<br>$\pm 0.009$ | 0.031<br>$\pm 0.009$ | <b>0.083</b><br>$\pm 0.016$ | 0.033<br>$\pm 0.009$   | 0.042<br>$\pm 0.009$ | 0.075<br>$\pm 0.019$        | 0.076<br>$\pm 0.011$  | 0.030<br>$\pm 0.006$  | $\frac{0.117}{\pm 0.013}$    | 0.066<br>$\pm 0.018$         |
|                 | Acc.1    | 0.093<br>$\pm 0.019$        | 0.077<br>$\pm 0.014$ | 0.128<br>$\pm 0.027$ | 0.136<br>$\pm 0.030$        | 0.099<br>$\pm 0.034$        | 0.083<br>$\pm 0.019$ | 0.071<br>$\pm 0.015$ | 0.112<br>$\pm 0.020$ | 0.062<br>$\pm 0.010$ | <b>0.151</b><br>$\pm 0.016$ | 0.058<br>$\pm 0.022$   | 0.073<br>$\pm 0.006$ | 0.142<br>$\pm 0.038$        | 0.136<br>$\pm 0.010$  | 0.057<br>$\pm 0.010$  | $\frac{0.171}{\pm 0.020}$    | 0.099<br>$\pm 0.024$         |
|                 |          | 0.093<br>$\pm 0.019$        | 0.077<br>$\pm 0.014$ | 0.128<br>$\pm 0.027$ | 0.136<br>$\pm 0.030$        | 0.099<br>$\pm 0.034$        | 0.083<br>$\pm 0.019$ | 0.071<br>$\pm 0.015$ | 0.112<br>$\pm 0.020$ | 0.062<br>$\pm 0.010$ | <b>0.151</b><br>$\pm 0.016$ | 0.058<br>$\pm 0.022$   | 0.073<br>$\pm 0.006$ | 0.142<br>$\pm 0.038$        | 0.136<br>$\pm 0.010$  | 0.057<br>$\pm 0.010$  | $\frac{0.171}{\pm 0.020}$    | 0.099<br>$\pm 0.024$         |
| Subject32_async | $\kappa$ | <b>0.406</b><br>$\pm 0.060$ | 0.033<br>$\pm 0.025$ | 0.076<br>$\pm 0.062$ | $\frac{0.490}{\pm 0.120}$   | 0.153<br>$\pm 0.030$        | 0.178<br>$\pm 0.055$ | 0.119<br>$\pm 0.032$ | 0.056<br>$\pm 0.012$ | 0.007<br>$\pm 0.008$ | 0.019<br>$\pm 0.012$        | 0.070<br>$\pm 0.021$   | 0.019<br>$\pm 0.010$ | 0.379<br>$\pm 0.027$        | 0.137<br>$\pm 0.033$  | 0.026<br>$\pm 0.007$  | 0.167<br>$\pm 0.054$         | 0.041<br>$\pm 0.009$         |
|                 |          | <b>0.955</b><br>$\pm 0.012$ | 0.646<br>$\pm 0.047$ | 0.691<br>$\pm 0.084$ | $\frac{0.961}{\pm 0.016}$   | 0.746<br>$\pm 0.021$        | 0.780<br>$\pm 0.053$ | 0.745<br>$\pm 0.037$ | 0.631<br>$\pm 0.014$ | 0.520<br>$\pm 0.018$ | 0.593<br>$\pm 0.024$        | 0.702<br>$\pm 0.014$   | 0.566<br>$\pm 0.019$ | 0.935<br>$\pm 0.006$        | 0.725<br>$\pm 0.031$  | 0.585<br>$\pm 0.018$  | 0.756<br>$\pm 0.050$         | 0.648<br>$\pm 0.029$         |
|                 | BAcc     | <b>0.421</b><br>$\pm 0.058$ | 0.057<br>$\pm 0.024$ | 0.099<br>$\pm 0.060$ | $\frac{0.503}{\pm 0.117}$   | 0.175<br>$\pm 0.029$        | 0.198<br>$\pm 0.054$ | 0.141<br>$\pm 0.031$ | 0.080<br>$\pm 0.012$ | 0.031<br>$\pm 0.008$ | 0.044<br>$\pm 0.012$        | 0.093<br>$\pm 0.021$   | 0.044<br>$\pm 0.009$ | 0.395<br>$\pm 0.027$        | 0.158<br>$\pm 0.032$  | 0.050<br>$\pm 0.007$  | 0.188<br>$\pm 0.053$         | 0.065<br>$\pm 0.009$         |
|                 |          | <b>0.421</b><br>$\pm 0.058$ | 0.057<br>$\pm 0.024$ | 0.099<br>$\pm 0.060$ | $\frac{0.503}{\pm 0.117}$   | 0.175<br>$\pm 0.029$        | 0.197<br>$\pm 0.054$ | 0.140<br>$\pm 0.031$ | 0.078<br>$\pm 0.012$ | 0.031<br>$\pm 0.008$ | 0.043<br>$\pm 0.011$        | 0.093<br>$\pm 0.020$   | 0.043<br>$\pm 0.009$ | 0.393<br>$\pm 0.027$        | 0.157<br>$\pm 0.033$  | 0.049<br>$\pm 0.007$  | 0.186<br>$\pm 0.054$         | 0.064<br>$\pm 0.008$         |
|                 | Acc.1    | <b>0.607</b><br>$\pm 0.059$ | 0.114<br>$\pm 0.041$ | 0.176<br>$\pm 0.094$ | $\frac{0.718}{\pm 0.072}$   | 0.260<br>$\pm 0.026$        | 0.319<br>$\pm 0.077$ | 0.231<br>$\pm 0.046$ | 0.140<br>$\pm 0.021$ | 0.054<br>$\pm 0.010$ | 0.089<br>$\pm 0.028$        | 0.172<br>$\pm 0.030$   | 0.079<br>$\pm 0.013$ | 0.596<br>$\pm 0.022$        | 0.257<br>$\pm 0.047$  | 0.094<br>$\pm 0.004$  | 0.297<br>$\pm 0.076$         | 0.124<br>$\pm 0.022$         |
|                 |          | <b>0.607</b><br>$\pm 0.059$ | 0.114<br>$\pm 0.041$ | 0.176<br>$\pm 0.094$ | $\frac{0.718}{\pm 0.072}$   | 0.260<br>$\pm 0.026$        | 0.319<br>$\pm 0.077$ | 0.231<br>$\pm 0.046$ | 0.140<br>$\pm 0.021$ | 0.054<br>$\pm 0.010$ | 0.089<br>$\pm 0.028$        | 0.172<br>$\pm 0.030$   | 0.079<br>$\pm 0.013$ | 0.596<br>$\pm 0.022$        | 0.257<br>$\pm 0.047$  | 0.094<br>$\pm 0.004$  | 0.297<br>$\pm 0.076$         | 0.124<br>$\pm 0.022$         |
| Subject33_async | $\kappa$ | 0.037<br>$\pm 0.019$        | 0.022<br>$\pm 0.020$ | 0.058<br>$\pm 0.014$ | 0.056<br>$\pm 0.023$        | 0.016<br>$\pm 0.017$        | 0.019<br>$\pm 0.010$ | 0.009<br>$\pm 0.018$ | 0.033<br>$\pm 0.007$ | 0.003<br>$\pm 0.007$ | 0.033<br>$\pm 0.034$        | 0.008<br>$\pm 0.021$   | 0.014<br>$\pm 0.012$ | <b>0.064</b><br>$\pm 0.015$ | 0.059<br>$\pm 0.024$  | 0.019<br>$\pm 0.012$  | $\frac{0.075}{\pm 0.025}$    | 0.023<br>$\pm 0.025$         |
|                 |          | $\frac{0.695}{\pm 0.022}$   | 0.633<br>$\pm 0.022$ | 0.676<br>$\pm 0.029$ | <b>0.686</b><br>$\pm 0.017$ | 0.604<br>$\pm 0.041$        | 0.545<br>$\pm 0.047$ | 0.565<br>$\pm 0.034$ | 0.585<br>$\pm 0.019$ | 0.522<br>$\pm 0.015$ | 0.631<br>$\pm 0.057$        | 0.595<br>$\pm 0.028$   | 0.544<br>$\pm 0.017$ | 0.679<br>$\pm 0.011$        | 0.619<br>$\pm 0.027$  | 0.598<br>$\pm 0.014$  | 0.643<br>$\pm 0.036$         | 0.627<br>$\pm 0.019$         |

Continued on next page

| Subject         | Metric   | DeepConvnet                    | EEGNet          | Conformer       | CTNet                          | SSVEPDNN        | BIOT <sup>(f)</sup> | BIOT <sup>(l)</sup> | BENDR <sup>(f)</sup> | BENDR <sup>(l)</sup> | CBraMod <sup>(f)</sup> | CBraMod <sup>(l)</sup> | EEGPT <sup>(f)</sup> | EEGPT <sup>(l)</sup>           | LaBraM <sup>(f)</sup> | LaBraM <sup>(l)</sup> | STEEGformer-s <sup>(f)</sup> | STEEGformer-s <sup>(l)</sup> |
|-----------------|----------|--------------------------------|-----------------|-----------------|--------------------------------|-----------------|---------------------|---------------------|----------------------|----------------------|------------------------|------------------------|----------------------|--------------------------------|-----------------------|-----------------------|------------------------------|------------------------------|
| Subject34_async | BAcc     | 0.061<br>±0.019                | 0.047<br>±0.020 | 0.082<br>±0.014 | 0.080<br>±0.023                | 0.040<br>±0.016 | 0.043<br>±0.010     | 0.034<br>±0.017     | 0.057<br>±0.007      | 0.028<br>±0.007      | 0.057<br>±0.033        | 0.033<br>±0.021        | 0.038<br>±0.012      | <b>0.087</b><br>± <b>0.014</b> | 0.083<br>±0.023       | 0.043<br>±0.011       | 0.098<br>± 0.024             | 0.048<br>±0.024              |
|                 |          | 0.061<br>±0.019                | 0.047<br>±0.020 | 0.082<br>±0.014 | 0.080<br>±0.023                | 0.040<br>±0.016 | 0.043<br>±0.010     | 0.033<br>±0.017     | 0.058<br>±0.006      | 0.028<br>±0.007      | 0.056<br>±0.033        | 0.033<br>±0.020        | 0.038<br>±0.012      | <b>0.087</b><br>± <b>0.014</b> | 0.083<br>±0.024       | 0.043<br>±0.012       | 0.099<br>± 0.023             | 0.047<br>±0.023              |
|                 | Acc.1    | 0.113<br>±0.023                | 0.088<br>±0.017 | 0.147<br>±0.018 | 0.128<br>±0.025                | 0.079<br>±0.026 | 0.077<br>±0.012     | 0.069<br>±0.021     | 0.106<br>±0.010      | 0.055<br>±0.011      | 0.118<br>±0.040        | 0.072<br>±0.039        | 0.068<br>±0.016      | <b>0.158</b><br>± <b>0.025</b> | 0.150<br>±0.031       | 0.079<br>±0.017       | 0.175<br>± 0.028             | 0.101<br>±0.027              |
|                 |          | 0.113<br>±0.023                | 0.088<br>±0.017 | 0.147<br>±0.018 | 0.128<br>±0.025                | 0.079<br>±0.026 | 0.077<br>±0.012     | 0.069<br>±0.021     | 0.106<br>±0.010      | 0.055<br>±0.011      | 0.118<br>±0.040        | 0.072<br>±0.039        | 0.068<br>±0.016      | <b>0.158</b><br>± <b>0.025</b> | 0.150<br>±0.031       | 0.079<br>±0.017       | 0.175<br>± 0.028             | 0.101<br>±0.027              |
|                 | $\kappa$ | 0.048<br>±0.035                | 0.021<br>±0.017 | 0.039<br>±0.010 | <b>0.151</b><br>± <b>0.025</b> | 0.034<br>±0.013 | 0.011<br>±0.013     | 0.006<br>±0.015     | 0.022<br>±0.013      | -0.000<br>±0.009     | 0.041<br>±0.007        | 0.018<br>±0.018        | 0.022<br>±0.012      | 0.178<br>± 0.012               | 0.037<br>±0.023       | -0.002<br>±0.008      | 0.029<br>±0.033              | 0.021<br>±0.021              |
|                 |          | 0.615<br>±0.028                | 0.591<br>±0.036 | 0.623<br>±0.014 | <b>0.796</b><br>± <b>0.027</b> | 0.583<br>±0.024 | 0.541<br>±0.048     | 0.541<br>±0.016     | 0.566<br>±0.028      | 0.526<br>±0.013      | 0.616<br>±0.033        | 0.560<br>±0.011        | 0.562<br>±0.013      | 0.805<br>± 0.012               | 0.558<br>±0.009       | 0.515<br>±0.021       | 0.589<br>±0.029              | 0.529<br>±0.036              |
|                 | BAcc     | 0.072<br>±0.034                | 0.045<br>±0.017 | 0.063<br>±0.010 | <b>0.172</b><br>± <b>0.025</b> | 0.059<br>±0.013 | 0.036<br>±0.012     | 0.031<br>±0.014     | 0.047<br>±0.013      | 0.025<br>±0.008      | 0.065<br>±0.007        | 0.043<br>±0.018        | 0.046<br>±0.012      | 0.198<br>± 0.012               | 0.061<br>±0.022       | 0.023<br>±0.008       | 0.053<br>±0.032              | 0.045<br>±0.020              |
|                 |          | 0.072<br>±0.034                | 0.045<br>±0.017 | 0.063<br>±0.010 | <b>0.172</b><br>± <b>0.025</b> | 0.059<br>±0.013 | 0.036<br>±0.011     | 0.031<br>±0.014     | 0.047<br>±0.013      | 0.024<br>±0.008      | 0.066<br>±0.009        | 0.043<br>±0.018        | 0.047<br>±0.012      | 0.198<br>± 0.010               | 0.061<br>±0.024       | 0.023<br>±0.007       | 0.052<br>±0.031              | 0.045<br>±0.020              |
|                 | Acc.1    | 0.119<br>±0.041                | 0.076<br>±0.022 | 0.109<br>±0.014 | <b>0.280</b><br>± <b>0.026</b> | 0.109<br>±0.022 | 0.074<br>±0.019     | 0.061<br>±0.013     | 0.096<br>±0.024      | 0.054<br>±0.012      | 0.112<br>±0.017        | 0.078<br>±0.016        | 0.087<br>±0.010      | 0.306<br>± 0.023               | 0.107<br>±0.027       | 0.053<br>±0.012       | 0.101<br>±0.043              | 0.081<br>±0.018              |
|                 |          | 0.119<br>±0.041                | 0.076<br>±0.022 | 0.109<br>±0.014 | <b>0.280</b><br>± <b>0.026</b> | 0.109<br>±0.022 | 0.074<br>±0.019     | 0.061<br>±0.013     | 0.096<br>±0.024      | 0.054<br>±0.012      | 0.112<br>±0.017        | 0.078<br>±0.016        | 0.087<br>±0.010      | 0.306<br>± 0.023               | 0.107<br>±0.027       | 0.053<br>±0.012       | 0.101<br>±0.043              | 0.081<br>±0.018              |
| Subject35_async | $\kappa$ | 0.043<br>±0.021                | 0.053<br>±0.026 | 0.042<br>±0.016 | <b>0.062</b><br>± <b>0.028</b> | 0.043<br>±0.013 | 0.032<br>±0.017     | 0.011<br>±0.017     | 0.052<br>±0.006      | 0.014<br>±0.008      | 0.043<br>±0.033        | 0.022<br>±0.014        | 0.018<br>±0.015      | 0.106<br>± 0.040               | 0.044<br>±0.016       | 0.028<br>±0.015       | 0.042<br>±0.021              | 0.012<br>±0.020              |
|                 |          | 0.682<br>±0.023                | 0.687<br>±0.044 | 0.641<br>±0.031 | <b>0.701</b><br>± <b>0.049</b> | 0.659<br>±0.024 | 0.588<br>±0.034     | 0.545<br>±0.033     | 0.620<br>±0.013      | 0.554<br>±0.020      | 0.641<br>±0.016        | 0.614<br>±0.037        | 0.559<br>±0.023      | 0.741<br>± 0.020               | 0.620<br>±0.038       | 0.568<br>±0.025       | 0.598<br>±0.028              | 0.591<br>±0.073              |
|                 | BAcc     | 0.067<br>±0.020                | 0.077<br>±0.025 | 0.066<br>±0.015 | <b>0.085</b><br>± <b>0.027</b> | 0.067<br>±0.013 | 0.056<br>±0.017     | 0.035<br>±0.017     | 0.076<br>±0.006      | 0.039<br>±0.008      | 0.067<br>±0.032        | 0.047<br>±0.013        | 0.043<br>±0.015      | 0.128<br>± 0.039               | 0.068<br>±0.015       | 0.052<br>±0.014       | 0.066<br>±0.021              | 0.037<br>±0.020              |
|                 |          | 0.067<br>±0.020                | 0.077<br>±0.025 | 0.066<br>±0.015 | <b>0.085</b><br>± <b>0.027</b> | 0.067<br>±0.013 | 0.057<br>±0.017     | 0.035<br>±0.017     | 0.076<br>±0.005      | 0.039<br>±0.008      | 0.066<br>±0.032        | 0.047<br>±0.013        | 0.042<br>±0.015      | 0.129<br>± 0.039               | 0.069<br>±0.014       | 0.052<br>±0.015       | 0.066<br>±0.020              | 0.039<br>±0.021              |
|                 | Acc.1    | 0.120<br>±0.021                | 0.130<br>±0.044 | 0.115<br>±0.023 | <b>0.162</b><br>± <b>0.046</b> | 0.132<br>±0.015 | 0.108<br>±0.033     | 0.066<br>±0.025     | 0.139<br>±0.025      | 0.070<br>±0.018      | 0.125<br>±0.043        | 0.098<br>±0.023        | 0.072<br>±0.017      | 0.216<br>± 0.044               | 0.128<br>±0.025       | 0.087<br>±0.024       | 0.105<br>±0.028              | 0.076<br>±0.041              |
|                 |          | 0.120<br>±0.021                | 0.130<br>±0.044 | 0.115<br>±0.023 | <b>0.162</b><br>± <b>0.046</b> | 0.132<br>±0.015 | 0.108<br>±0.033     | 0.066<br>±0.025     | 0.139<br>±0.025      | 0.070<br>±0.018      | 0.125<br>±0.043        | 0.098<br>±0.023        | 0.072<br>±0.017      | 0.216<br>± 0.044               | 0.128<br>±0.025       | 0.087<br>±0.024       | 0.105<br>±0.028              | 0.076<br>±0.041              |
| Subject3_async  | $\kappa$ | <b>0.102</b><br>± <b>0.189</b> | 0.023<br>±0.040 | 0.051<br>±0.100 | 0.136<br>± 0.237               | 0.025<br>±0.042 | 0.074<br>±0.133     | 0.048<br>±0.100     | 0.031<br>±0.035      | 0.007<br>±0.009      | 0.006<br>±0.019        | 0.012<br>±0.018        | 0.038<br>±0.070      | 0.098<br>±0.168                | 0.091<br>±0.168       | 0.006<br>±0.012       | 0.053<br>±0.093              | 0.004<br>±0.016              |
|                 |          | 0.689<br>±0.124                | 0.582<br>±0.070 | 0.611<br>±0.103 | 0.716<br>± 0.121               | 0.574<br>±0.062 | 0.616<br>±0.127     | 0.574<br>±0.125     | 0.580<br>±0.063      | 0.533<br>±0.020      | 0.533<br>±0.049        | 0.559<br>±0.051        | 0.588<br>±0.106      | <b>0.715</b><br>± <b>0.108</b> | 0.629<br>±0.128       | 0.518<br>±0.032       | 0.614<br>±0.101              | 0.534<br>±0.059              |
|                 | AUC      | <b>0.125</b><br>± <b>0.184</b> | 0.048<br>±0.039 | 0.075<br>±0.098 | 0.158<br>± 0.231               | 0.049<br>±0.041 | 0.097<br>±0.130     | 0.072<br>±0.098     | 0.055<br>±0.034      | 0.032<br>±0.009      | 0.031<br>±0.019        | 0.037<br>±0.018        | 0.062<br>±0.069      | 0.120<br>±0.163                | 0.113<br>±0.163       | 0.031<br>±0.012       | 0.077<br>±0.090              | 0.028<br>±0.015              |
|                 | BAcc     | <b>0.125</b><br>± <b>0.184</b> | 0.048<br>±0.039 | 0.075<br>±0.098 | 0.158<br>± 0.231               | 0.049<br>±0.041 | 0.097<br>±0.130     | 0.072<br>±0.098     | 0.055<br>±0.034      | 0.032<br>±0.009      | 0.031<br>±0.019        | 0.037<br>±0.018        | 0.062<br>±0.069      | 0.120<br>±0.163                | 0.113<br>±0.163       | 0.031<br>±0.012       | 0.077<br>±0.090              | 0.028<br>±0.015              |

Continued on next page

| Subject        | Metric   | DeepConvnet                 | EEGNet               | Conformer            | CTNet                                            | SSVEPDNN             | BIOT (f)                    | BIOT (l)             | BENDR (f)            | BENDR (l)             | CBraMod (f)          | CBraMod (l)          | EEGPT (f)            | EEGPT (l)                                        | LaBraM (f)                  | LaBraM (l)           | STEEGformer-s (f)                                | STEEGformer-s (l)    |
|----------------|----------|-----------------------------|----------------------|----------------------|--------------------------------------------------|----------------------|-----------------------------|----------------------|----------------------|-----------------------|----------------------|----------------------|----------------------|--------------------------------------------------|-----------------------------|----------------------|--------------------------------------------------|----------------------|
|                | Acc.1    | <b>0.125</b><br>$\pm 0.184$ | 0.048<br>$\pm 0.039$ | 0.075<br>$\pm 0.098$ | $\begin{matrix} 0.158 \\ \pm 0.231 \end{matrix}$ | 0.049<br>$\pm 0.041$ | 0.097<br>$\pm 0.129$        | 0.072<br>$\pm 0.097$ | 0.056<br>$\pm 0.034$ | 0.032<br>$\pm 0.009$  | 0.031<br>$\pm 0.019$ | 0.036<br>$\pm 0.018$ | 0.062<br>$\pm 0.068$ | 0.120<br>$\pm 0.164$                             | 0.113<br>$\pm 0.164$        | 0.031<br>$\pm 0.012$ | 0.076<br>$\pm 0.089$                             | 0.028<br>$\pm 0.015$ |
|                | Acc.2    | <b>0.190</b><br>$\pm 0.234$ | 0.087<br>$\pm 0.060$ | 0.127<br>$\pm 0.135$ | $\begin{matrix} 0.231 \\ \pm 0.271 \end{matrix}$ | 0.087<br>$\pm 0.058$ | 0.156<br>$\pm 0.177$        | 0.122<br>$\pm 0.140$ | 0.099<br>$\pm 0.051$ | 0.063<br>$\pm 0.014$  | 0.063<br>$\pm 0.031$ | 0.068<br>$\pm 0.028$ | 0.109<br>$\pm 0.100$ | 0.185<br>$\pm 0.213$                             | 0.177<br>$\pm 0.211$        | 0.059<br>$\pm 0.016$ | 0.135<br>$\pm 0.134$                             | 0.058<br>$\pm 0.023$ |
|                | $\kappa$ | 0.002<br>$\pm 0.009$        | 0.005<br>$\pm 0.011$ | 0.010<br>$\pm 0.010$ | <b>0.020</b><br>$\pm 0.013$                      | 0.009<br>$\pm 0.016$ | 0.018<br>$\pm 0.025$        | 0.000<br>$\pm 0.012$ | 0.008<br>$\pm 0.013$ | -0.000<br>$\pm 0.007$ | 0.018<br>$\pm 0.027$ | 0.017<br>$\pm 0.020$ | 0.001<br>$\pm 0.007$ | 0.010<br>$\pm 0.016$                             | 0.008<br>$\pm 0.004$        | 0.007<br>$\pm 0.012$ | $\begin{matrix} 0.028 \\ \pm 0.038 \end{matrix}$ | 0.007<br>$\pm 0.018$ |
| Subject4_async | AUC      | 0.533<br>$\pm 0.031$        | 0.528<br>$\pm 0.030$ | 0.533<br>$\pm 0.030$ | <b>0.566</b><br>$\pm 0.048$                      | 0.559<br>$\pm 0.032$ | 0.556<br>$\pm 0.041$        | 0.513<br>$\pm 0.045$ | 0.507<br>$\pm 0.020$ | 0.494<br>$\pm 0.005$  | 0.538<br>$\pm 0.030$ | 0.562<br>$\pm 0.015$ | 0.504<br>$\pm 0.019$ | $\begin{matrix} 0.567 \\ \pm 0.030 \end{matrix}$ | 0.535<br>$\pm 0.026$        | 0.508<br>$\pm 0.018$ | $\begin{matrix} 0.563 \\ \pm 0.062 \end{matrix}$ | 0.519<br>$\pm 0.015$ |
|                | BAcc     | 0.027<br>$\pm 0.009$        | 0.030<br>$\pm 0.011$ | 0.035<br>$\pm 0.010$ | <b>0.045</b><br>$\pm 0.012$                      | 0.034<br>$\pm 0.015$ | 0.043<br>$\pm 0.024$        | 0.025<br>$\pm 0.012$ | 0.033<br>$\pm 0.013$ | 0.025<br>$\pm 0.007$  | 0.042<br>$\pm 0.027$ | 0.042<br>$\pm 0.019$ | 0.026<br>$\pm 0.007$ | 0.035<br>$\pm 0.016$                             | 0.033<br>$\pm 0.003$        | 0.031<br>$\pm 0.012$ | $\begin{matrix} 0.052 \\ \pm 0.037 \end{matrix}$ | 0.031<br>$\pm 0.017$ |
|                | Acc.1    | 0.027<br>$\pm 0.009$        | 0.030<br>$\pm 0.011$ | 0.035<br>$\pm 0.010$ | <b>0.045</b><br>$\pm 0.012$                      | 0.034<br>$\pm 0.015$ | 0.043<br>$\pm 0.026$        | 0.025<br>$\pm 0.012$ | 0.034<br>$\pm 0.013$ | 0.025<br>$\pm 0.007$  | 0.043<br>$\pm 0.027$ | 0.042<br>$\pm 0.019$ | 0.026<br>$\pm 0.007$ | 0.035<br>$\pm 0.015$                             | 0.034<br>$\pm 0.004$        | 0.031<br>$\pm 0.012$ | $\begin{matrix} 0.052 \\ \pm 0.038 \end{matrix}$ | 0.031<br>$\pm 0.017$ |
|                | Acc.2    | 0.055<br>$\pm 0.012$        | 0.062<br>$\pm 0.017$ | 0.061<br>$\pm 0.018$ | 0.085<br>$\pm 0.019$                             | 0.066<br>$\pm 0.017$ | <b>0.085</b><br>$\pm 0.040$ | 0.053<br>$\pm 0.021$ | 0.067<br>$\pm 0.019$ | 0.049<br>$\pm 0.004$  | 0.073<br>$\pm 0.039$ | 0.078<br>$\pm 0.026$ | 0.055<br>$\pm 0.007$ | 0.073<br>$\pm 0.019$                             | 0.065<br>$\pm 0.010$        | 0.058<br>$\pm 0.020$ | $\begin{matrix} 0.088 \\ \pm 0.056 \end{matrix}$ | 0.060<br>$\pm 0.026$ |
|                | $\kappa$ | 0.550<br>$\pm 0.191$        | 0.078<br>$\pm 0.043$ | 0.324<br>$\pm 0.101$ | $\begin{matrix} 0.709 \\ \pm 0.090 \end{matrix}$ | 0.109<br>$\pm 0.029$ | 0.407<br>$\pm 0.076$        | 0.300<br>$\pm 0.046$ | 0.115<br>$\pm 0.026$ | 0.024<br>$\pm 0.011$  | 0.021<br>$\pm 0.013$ | 0.047<br>$\pm 0.031$ | 0.248<br>$\pm 0.031$ | 0.573<br>$\pm 0.041$                             | <b>0.598</b><br>$\pm 0.081$ | 0.005<br>$\pm 0.006$ | 0.321<br>$\pm 0.105$                             | 0.052<br>$\pm 0.037$ |
|                | AUC      | 0.957<br>$\pm 0.046$        | 0.728<br>$\pm 0.052$ | 0.880<br>$\pm 0.048$ | $\begin{matrix} 0.987 \\ \pm 0.008 \end{matrix}$ | 0.732<br>$\pm 0.026$ | 0.910<br>$\pm 0.037$        | 0.893<br>$\pm 0.035$ | 0.743<br>$\pm 0.031$ | 0.578<br>$\pm 0.017$  | 0.609<br>$\pm 0.030$ | 0.675<br>$\pm 0.039$ | 0.852<br>$\pm 0.021$ | <b>0.968</b><br>$\pm 0.010$                      | 0.952<br>$\pm 0.020$        | 0.555<br>$\pm 0.046$ | 0.867<br>$\pm 0.040$                             | 0.613<br>$\pm 0.032$ |
| Subject5_async | BAcc     | 0.561<br>$\pm 0.186$        | 0.101<br>$\pm 0.041$ | 0.340<br>$\pm 0.098$ | $\begin{matrix} 0.716 \\ \pm 0.088 \end{matrix}$ | 0.131<br>$\pm 0.028$ | 0.422<br>$\pm 0.074$        | 0.317<br>$\pm 0.045$ | 0.137<br>$\pm 0.025$ | 0.049<br>$\pm 0.011$  | 0.045<br>$\pm 0.012$ | 0.071<br>$\pm 0.030$ | 0.267<br>$\pm 0.030$ | 0.584<br>$\pm 0.040$                             | <b>0.608</b><br>$\pm 0.079$ | 0.030<br>$\pm 0.006$ | 0.338<br>$\pm 0.103$                             | 0.075<br>$\pm 0.036$ |
|                | Acc.1    | 0.561<br>$\pm 0.186$        | 0.101<br>$\pm 0.041$ | 0.340<br>$\pm 0.098$ | $\begin{matrix} 0.716 \\ \pm 0.088 \end{matrix}$ | 0.131<br>$\pm 0.028$ | 0.419<br>$\pm 0.072$        | 0.318<br>$\pm 0.047$ | 0.137<br>$\pm 0.024$ | 0.049<br>$\pm 0.010$  | 0.046<br>$\pm 0.012$ | 0.070<br>$\pm 0.031$ | 0.265<br>$\pm 0.029$ | 0.585<br>$\pm 0.041$                             | <b>0.606</b><br>$\pm 0.079$ | 0.029<br>$\pm 0.006$ | 0.338<br>$\pm 0.100$                             | 0.074<br>$\pm 0.035$ |
|                | Acc.2    | 0.710<br>$\pm 0.216$        | 0.190<br>$\pm 0.058$ | 0.484<br>$\pm 0.127$ | $\begin{matrix} 0.885 \\ \pm 0.060 \end{matrix}$ | 0.214<br>$\pm 0.042$ | 0.591<br>$\pm 0.097$        | 0.489<br>$\pm 0.065$ | 0.235<br>$\pm 0.036$ | 0.083<br>$\pm 0.013$  | 0.091<br>$\pm 0.025$ | 0.140<br>$\pm 0.043$ | 0.390<br>$\pm 0.046$ | 0.746<br>$\pm 0.054$                             | <b>0.764</b><br>$\pm 0.052$ | 0.065<br>$\pm 0.014$ | 0.501<br>$\pm 0.106$                             | 0.115<br>$\pm 0.041$ |
|                | $\kappa$ | 0.101<br>$\pm 0.120$        | 0.063<br>$\pm 0.040$ | 0.078<br>$\pm 0.045$ | $\begin{matrix} 0.541 \\ \pm 0.036 \end{matrix}$ | 0.053<br>$\pm 0.018$ | 0.083<br>$\pm 0.034$        | 0.060<br>$\pm 0.031$ | 0.050<br>$\pm 0.024$ | 0.003<br>$\pm 0.009$  | 0.054<br>$\pm 0.019$ | 0.027<br>$\pm 0.016$ | 0.060<br>$\pm 0.038$ | <b>0.283</b><br>$\pm 0.046$                      | 0.145<br>$\pm 0.036$        | 0.019<br>$\pm 0.004$ | 0.159<br>$\pm 0.091$                             | 0.028<br>$\pm 0.013$ |
| Subject6_async | AUC      | 0.755<br>$\pm 0.119$        | 0.663<br>$\pm 0.085$ | 0.692<br>$\pm 0.054$ | $\begin{matrix} 0.973 \\ \pm 0.004 \end{matrix}$ | 0.626<br>$\pm 0.010$ | 0.695<br>$\pm 0.059$        | 0.674<br>$\pm 0.034$ | 0.598<br>$\pm 0.019$ | 0.517<br>$\pm 0.016$  | 0.599<br>$\pm 0.019$ | 0.635<br>$\pm 0.020$ | 0.639<br>$\pm 0.058$ | <b>0.894</b><br>$\pm 0.018$                      | 0.714<br>$\pm 0.036$        | 0.531<br>$\pm 0.027$ | 0.762<br>$\pm 0.064$                             | 0.606<br>$\pm 0.046$ |
|                | BAcc     | 0.124<br>$\pm 0.117$        | 0.086<br>$\pm 0.039$ | 0.101<br>$\pm 0.044$ | $\begin{matrix} 0.552 \\ \pm 0.035 \end{matrix}$ | 0.076<br>$\pm 0.018$ | 0.106<br>$\pm 0.034$        | 0.083<br>$\pm 0.030$ | 0.074<br>$\pm 0.023$ | 0.028<br>$\pm 0.009$  | 0.078<br>$\pm 0.018$ | 0.051<br>$\pm 0.015$ | 0.083<br>$\pm 0.037$ | <b>0.301</b><br>$\pm 0.045$                      | 0.166<br>$\pm 0.035$        | 0.044<br>$\pm 0.004$ | 0.180<br>$\pm 0.089$                             | 0.052<br>$\pm 0.013$ |
|                | Acc.1    | 0.124<br>$\pm 0.117$        | 0.086<br>$\pm 0.039$ | 0.101<br>$\pm 0.044$ | $\begin{matrix} 0.552 \\ \pm 0.035 \end{matrix}$ | 0.076<br>$\pm 0.018$ | 0.106<br>$\pm 0.033$        | 0.083<br>$\pm 0.030$ | 0.074<br>$\pm 0.023$ | 0.028<br>$\pm 0.009$  | 0.077<br>$\pm 0.018$ | 0.051<br>$\pm 0.014$ | 0.082<br>$\pm 0.037$ | <b>0.298</b><br>$\pm 0.045$                      | 0.164<br>$\pm 0.035$        | 0.043<br>$\pm 0.004$ | 0.180<br>$\pm 0.088$                             | 0.051<br>$\pm 0.013$ |
|                | Acc.2    | 0.124<br>$\pm 0.117$        | 0.086<br>$\pm 0.039$ | 0.101<br>$\pm 0.044$ | $\begin{matrix} 0.552 \\ \pm 0.035 \end{matrix}$ | 0.076<br>$\pm 0.018$ | 0.106<br>$\pm 0.033$        | 0.083<br>$\pm 0.030$ | 0.074<br>$\pm 0.023$ | 0.028<br>$\pm 0.009$  | 0.077<br>$\pm 0.018$ | 0.051<br>$\pm 0.014$ | 0.082<br>$\pm 0.037$ | <b>0.298</b><br>$\pm 0.045$                      | 0.164<br>$\pm 0.035$        | 0.043<br>$\pm 0.004$ | 0.180<br>$\pm 0.088$                             | 0.051<br>$\pm 0.013$ |

Continued on next page



| Subject        | Metric   | DeepConvnet     | EEGNet          | Conformer       | CTNet                          | SSVEPDNN        | BIOT (f)        | BIOT (l)        | BENDR (f)       | BENDR (l)       | CBraMod (f)     | CBraMod (l)      | EEGPT (f)       | EEGPT (l)                      | LaBraM (f)      | LaBraM (l)      | STEEGformer-s (f) | STEEGformer-s (l) |
|----------------|----------|-----------------|-----------------|-----------------|--------------------------------|-----------------|-----------------|-----------------|-----------------|-----------------|-----------------|------------------|-----------------|--------------------------------|-----------------|-----------------|-------------------|-------------------|
|                | Acc.2    | 0.228<br>±0.198 | 0.158<br>±0.064 | 0.185<br>±0.060 | 0.754<br>± 0.039               | 0.127<br>±0.016 | 0.187<br>±0.058 | 0.156<br>±0.040 | 0.121<br>±0.029 | 0.058<br>±0.012 | 0.126<br>±0.020 | 0.101<br>±0.016  | 0.143<br>±0.054 | <b>0.456</b><br>± <b>0.058</b> | 0.255<br>±0.041 | 0.076<br>±0.006 | 0.294<br>±0.108   | 0.082<br>±0.026   |
| Subject7_async | $\kappa$ | 0.033<br>±0.019 | 0.031<br>±0.017 | 0.047<br>±0.023 | <b>0.129</b><br>± <b>0.029</b> | 0.037<br>±0.007 | 0.031<br>±0.030 | 0.030<br>±0.027 | 0.032<br>±0.025 | 0.000<br>±0.009 | 0.038<br>±0.016 | 0.018<br>±0.014  | 0.018<br>±0.010 | 0.163<br>± 0.039               | 0.075<br>±0.034 | 0.015<br>±0.014 | 0.071<br>±0.024   | 0.038<br>±0.021   |
|                | AUC      | 0.694<br>±0.024 | 0.625<br>±0.032 | 0.654<br>±0.023 | <b>0.781</b><br>± <b>0.035</b> | 0.617<br>±0.023 | 0.576<br>±0.047 | 0.601<br>±0.038 | 0.594<br>±0.027 | 0.514<br>±0.013 | 0.621<br>±0.027 | 0.579<br>±0.006  | 0.538<br>±0.015 | 0.799<br>± 0.025               | 0.656<br>±0.026 | 0.574<br>±0.011 | 0.620<br>±0.038   | 0.627<br>±0.038   |
|                | BAcc     | 0.057<br>±0.019 | 0.055<br>±0.016 | 0.070<br>±0.022 | <b>0.150</b><br>± <b>0.028</b> | 0.061<br>±0.007 | 0.055<br>±0.030 | 0.054<br>±0.027 | 0.056<br>±0.024 | 0.025<br>±0.008 | 0.062<br>±0.015 | 0.043<br>±0.014  | 0.043<br>±0.010 | 0.184<br>± 0.038               | 0.098<br>±0.033 | 0.040<br>±0.014 | 0.094<br>±0.023   | 0.062<br>±0.021   |
|                | Acc.1    | 0.057<br>±0.019 | 0.055<br>±0.016 | 0.070<br>±0.022 | <b>0.150</b><br>± <b>0.028</b> | 0.061<br>±0.007 | 0.058<br>±0.031 | 0.056<br>±0.025 | 0.025<br>±0.024 | 0.062<br>±0.008 | 0.062<br>±0.015 | 0.043<br>±0.014  | 0.043<br>±0.011 | 0.185<br>± 0.039               | 0.098<br>±0.034 | 0.040<br>±0.014 | 0.096<br>±0.025   | 0.062<br>±0.020   |
|                | Acc.2    | 0.112<br>±0.024 | 0.095<br>±0.017 | 0.130<br>±0.031 | <b>0.241</b><br>± <b>0.031</b> | 0.110<br>±0.015 | 0.099<br>±0.038 | 0.104<br>±0.031 | 0.110<br>±0.038 | 0.053<br>±0.015 | 0.121<br>±0.024 | 0.073<br>±0.015  | 0.072<br>±0.022 | 0.297<br>± 0.043               | 0.179<br>±0.039 | 0.078<br>±0.018 | 0.174<br>±0.037   | 0.116<br>±0.024   |
|                | $\kappa$ | 0.017<br>±0.021 | 0.011<br>±0.021 | 0.029<br>±0.011 | <b>0.228</b><br>± <b>0.049</b> | 0.033<br>±0.018 | 0.029<br>±0.026 | 0.014<br>±0.029 | 0.030<br>±0.024 | 0.005<br>±0.010 | 0.025<br>±0.026 | 0.031<br>±0.030  | 0.026<br>±0.007 | 0.276<br>± 0.026               | 0.037<br>±0.022 | 0.021<br>±0.015 | 0.036<br>±0.023   | 0.030<br>±0.024   |
| Subject8_async | AUC      | 0.616<br>±0.026 | 0.593<br>±0.028 | 0.594<br>±0.034 | <b>0.846</b><br>± <b>0.017</b> | 0.603<br>±0.050 | 0.571<br>±0.037 | 0.573<br>±0.023 | 0.571<br>±0.050 | 0.538<br>±0.023 | 0.583<br>±0.032 | 0.589<br>±0.037  | 0.583<br>±0.023 | 0.867<br>± 0.025               | 0.566<br>±0.032 | 0.566<br>±0.038 | 0.548<br>±0.036   | 0.618<br>±0.034   |
|                | BAcc     | 0.041<br>±0.021 | 0.036<br>±0.020 | 0.054<br>±0.010 | <b>0.247</b><br>± <b>0.048</b> | 0.057<br>±0.018 | 0.054<br>±0.025 | 0.039<br>±0.028 | 0.054<br>±0.023 | 0.030<br>±0.010 | 0.050<br>±0.026 | 0.055<br>±0.030  | 0.050<br>±0.007 | 0.295<br>± 0.026               | 0.061<br>±0.021 | 0.045<br>±0.015 | 0.060<br>±0.022   | 0.054<br>±0.023   |
|                | Acc.1    | 0.041<br>±0.021 | 0.036<br>±0.020 | 0.054<br>±0.010 | <b>0.247</b><br>± <b>0.048</b> | 0.057<br>±0.018 | 0.053<br>±0.025 | 0.039<br>±0.028 | 0.054<br>±0.024 | 0.030<br>±0.010 | 0.050<br>±0.026 | 0.054<br>±0.029  | 0.050<br>±0.007 | 0.296<br>± 0.026               | 0.060<br>±0.021 | 0.045<br>±0.015 | 0.061<br>±0.023   | 0.053<br>±0.023   |
|                | Acc.2    | 0.087<br>±0.028 | 0.075<br>±0.020 | 0.103<br>±0.014 | <b>0.372</b><br>± <b>0.054</b> | 0.102<br>±0.023 | 0.096<br>±0.034 | 0.082<br>±0.034 | 0.101<br>±0.031 | 0.063<br>±0.010 | 0.098<br>±0.040 | 0.107<br>±0.042  | 0.093<br>±0.014 | 0.425<br>± 0.054               | 0.111<br>±0.017 | 0.077<br>±0.031 | 0.099<br>±0.017   | 0.096<br>±0.023   |
|                | $\kappa$ | 0.039<br>±0.032 | 0.024<br>±0.019 | 0.044<br>±0.012 | <b>0.115</b><br>± <b>0.041</b> | 0.060<br>±0.023 | 0.029<br>±0.013 | 0.027<br>±0.016 | 0.044<br>±0.012 | 0.008<br>±0.008 | 0.049<br>±0.029 | -0.000<br>±0.016 | 0.010<br>±0.005 | 0.120<br>± 0.028               | 0.045<br>±0.009 | 0.004<br>±0.013 | 0.081<br>±0.034   | 0.037<br>±0.016   |
|                | AUC      | 0.666<br>±0.037 | 0.645<br>±0.029 | 0.642<br>±0.026 | 0.749<br>± 0.025               | 0.646<br>±0.019 | 0.574<br>±0.025 | 0.558<br>±0.041 | 0.597<br>±0.021 | 0.535<br>±0.008 | 0.608<br>±0.034 | 0.537<br>±0.030  | 0.537<br>±0.012 | <b>0.740</b><br>± <b>0.006</b> | 0.600<br>±0.014 | 0.533<br>±0.015 | 0.656<br>±0.034   | 0.589<br>±0.048   |
| Subject9_async | BAcc     | 0.063<br>±0.031 | 0.048<br>±0.018 | 0.068<br>±0.012 | <b>0.137</b><br>± <b>0.040</b> | 0.084<br>±0.022 | 0.054<br>±0.013 | 0.051<br>±0.016 | 0.068<br>±0.012 | 0.033<br>±0.008 | 0.073<br>±0.028 | 0.025<br>±0.016  | 0.035<br>±0.005 | 0.142<br>± 0.027               | 0.069<br>±0.009 | 0.029<br>±0.013 | 0.104<br>±0.033   | 0.061<br>±0.015   |
|                | Acc.1    | 0.063<br>±0.031 | 0.048<br>±0.018 | 0.068<br>±0.012 | <b>0.137</b><br>± <b>0.040</b> | 0.084<br>±0.022 | 0.054<br>±0.014 | 0.051<br>±0.015 | 0.068<br>±0.012 | 0.033<br>±0.008 | 0.071<br>±0.027 | 0.024<br>±0.016  | 0.034<br>±0.005 | 0.142<br>± 0.027               | 0.068<br>±0.007 | 0.029<br>±0.012 | 0.104<br>±0.034   | 0.061<br>±0.015   |
|                | Acc.2    | 0.118<br>±0.050 | 0.095<br>±0.036 | 0.125<br>±0.019 | <b>0.218</b><br>± <b>0.041</b> | 0.150<br>±0.036 | 0.099<br>±0.017 | 0.089<br>±0.023 | 0.120<br>±0.032 | 0.060<br>±0.009 | 0.128<br>±0.032 | 0.047<br>±0.017  | 0.069<br>±0.013 | 0.226<br>± 0.031               | 0.131<br>±0.023 | 0.053<br>±0.011 | 0.170<br>±0.041   | 0.106<br>±0.023   |

7284  
7285  
7286  
7287  
7288  
7289  
7290  
7291  
7292  
7293  
7294  
7295  
7296  
7297  
7298  
7299  
7300  
7301  
7302  
7303  
7304  
7305  
7306  
7307  
7308  
7309  
7310  
7311  
7312  
7313  
7314  
7315  
7316

## Per-Subject Zero-Shot Transfer

Table 61: Average Zero-Shot Transfer Performance Across All Subjects

| Model (Training strategy) | $\kappa$     | AUC          | BAcc         | Acc.1        | Acc.2        |
|---------------------------|--------------|--------------|--------------|--------------|--------------|
|                           | 0.014        | 0.577        | 0.039        | 0.039        | 0.074        |
| <b>DeepConvnet</b>        | $\pm 0.009$  | $\pm 0.025$  | $\pm 0.009$  | $\pm 0.009$  | $\pm 0.013$  |
|                           | 0.012        | 0.560        | 0.037        | 0.037        | 0.072        |
| <b>EEGNet</b>             | $\pm 0.003$  | $\pm 0.015$  | $\pm 0.003$  | $\pm 0.003$  | $\pm 0.005$  |
|                           | 0.016        | 0.565        | 0.040        | 0.040        | 0.078        |
| <b>Conformer</b>          | $\pm 0.005$  | $\pm 0.014$  | $\pm 0.005$  | $\pm 0.005$  | $\pm 0.008$  |
|                           | <b>0.022</b> | <b>0.594</b> | <b>0.046</b> | <b>0.046</b> | <b>0.087</b> |
| <b>CTNet</b>              | $\pm 0.016$  | $\pm 0.041$  | $\pm 0.016$  | $\pm 0.016$  | $\pm 0.025$  |
|                           | 0.012        | 0.551        | 0.036        | 0.036        | 0.070        |
| <b>SSVEPDNN</b>           | $\pm 0.004$  | $\pm 0.015$  | $\pm 0.004$  | $\pm 0.004$  | $\pm 0.006$  |
|                           | 0.008        | 0.526        | 0.033        | 0.033        | 0.064        |
| <b>BIOT (f)</b>           | $\pm 0.007$  | $\pm 0.018$  | $\pm 0.007$  | $\pm 0.007$  | $\pm 0.012$  |
|                           | 0.003        | 0.513        | 0.028        | 0.028        | 0.056        |
| <b>BIOT (l)</b>           | $\pm 0.004$  | $\pm 0.012$  | $\pm 0.004$  | $\pm 0.004$  | $\pm 0.007$  |
|                           | 0.013        | 0.541        | 0.038        | 0.038        | 0.074        |
| <b>BENDR (f)</b>          | $\pm 0.004$  | $\pm 0.011$  | $\pm 0.004$  | $\pm 0.004$  | $\pm 0.007$  |
|                           | 0.003        | 0.516        | 0.028        | 0.028        | 0.056        |
| <b>BENDR (l)</b>          | $\pm 0.001$  | $\pm 0.006$  | $\pm 0.001$  | $\pm 0.001$  | $\pm 0.002$  |
|                           | 0.008        | 0.534        | 0.033        | 0.033        | 0.065        |
| <b>CBraMod (f)</b>        | $\pm 0.003$  | $\pm 0.009$  | $\pm 0.003$  | $\pm 0.003$  | $\pm 0.005$  |
|                           | 0.008        | 0.541        | 0.032        | 0.033        | 0.064        |
| <b>CBraMod (l)</b>        | $\pm 0.004$  | $\pm 0.017$  | $\pm 0.004$  | $\pm 0.004$  | $\pm 0.007$  |
|                           | 0.004        | 0.517        | 0.029        | 0.029        | 0.057        |
| <b>EEGPT (f)</b>          | $\pm 0.004$  | $\pm 0.011$  | $\pm 0.004$  | $\pm 0.004$  | $\pm 0.006$  |
|                           | 0.024        | 0.607        | 0.049        | 0.049        | 0.091        |
| <b>EEGPT (l)</b>          | $\pm 0.014$  | $\pm 0.038$  | $\pm 0.013$  | $\pm 0.013$  | $\pm 0.022$  |
|                           | 0.011        | 0.534        | 0.036        | 0.036        | 0.069        |
| <b>LaBraM (f)</b>         | $\pm 0.010$  | $\pm 0.019$  | $\pm 0.009$  | $\pm 0.009$  | $\pm 0.014$  |
|                           | 0.001        | 0.509        | 0.026        | 0.026        | 0.052        |
| <b>LaBraM (l)</b>         | $\pm 0.001$  | $\pm 0.005$  | $\pm 0.001$  | $\pm 0.001$  | $\pm 0.002$  |
|                           | 0.008        | 0.536        | 0.033        | 0.033        | 0.065        |
| <b>STEEGformer-s (f)</b>  | $\pm 0.006$  | $\pm 0.017$  | $\pm 0.006$  | $\pm 0.006$  | $\pm 0.010$  |
|                           | 0.002        | 0.526        | 0.027        | 0.027        | 0.054        |
| <b>STEEGformer-s (l)</b>  | $\pm 0.002$  | $\pm 0.012$  | $\pm 0.001$  | $\pm 0.002$  | $\pm 0.003$  |

Table 62: Per-Subject Zero-Shot Transfer Performance

| Subject         | Metric   | DeepConvnet                 | EEGNet                      | Conformer                   | CTNet                | SSVEPDNN             | BIOT <sup>(f)</sup>   | BIOT <sup>(l)</sup>  | BENDR <sup>(f)</sup> | BENDR <sup>(l)</sup> | CBraMod <sup>(f)</sup> | CBraMod <sup>(l)</sup> | EEGPT <sup>(f)</sup> | EEGPT <sup>(l)</sup> | LaBraM <sup>(f)</sup> | LaBraM <sup>(l)</sup> | STEEGformers-s <sup>(f)</sup> | STEEGformers-s <sup>(l)</sup> |
|-----------------|----------|-----------------------------|-----------------------------|-----------------------------|----------------------|----------------------|-----------------------|----------------------|----------------------|----------------------|------------------------|------------------------|----------------------|----------------------|-----------------------|-----------------------|-------------------------------|-------------------------------|
| Subject10_async | $\kappa$ | 0.014<br>$\pm 0.010$        | 0.011<br>$\pm 0.008$        | <b>0.015</b><br>$\pm 0.008$ | 0.012<br>$\pm 0.010$ | 0.012<br>$\pm 0.007$ | 0.004<br>$\pm 0.007$  | 0.001<br>$\pm 0.005$ | 0.011<br>$\pm 0.006$ | 0.004<br>$\pm 0.003$ | 0.007<br>$\pm 0.009$   | 0.009<br>$\pm 0.008$   | 0.002<br>$\pm 0.004$ | 0.016<br>$\pm 0.009$ | 0.010<br>$\pm 0.009$  | 0.001<br>$\pm 0.004$  | 0.010<br>$\pm 0.009$          | 0.003<br>$\pm 0.009$          |
|                 | AUC      | <b>0.579</b><br>$\pm 0.031$ | 0.557<br>$\pm 0.023$        | 0.571<br>$\pm 0.024$        | 0.559<br>$\pm 0.028$ | 0.546<br>$\pm 0.017$ | 0.512<br>$\pm 0.016$  | 0.509<br>$\pm 0.012$ | 0.532<br>$\pm 0.013$ | 0.517<br>$\pm 0.007$ | 0.534<br>$\pm 0.019$   | 0.549<br>$\pm 0.018$   | 0.508<br>$\pm 0.009$ | 0.587<br>$\pm 0.024$ | 0.538<br>$\pm 0.019$  | 0.510<br>$\pm 0.014$  | 0.540<br>$\pm 0.022$          | 0.537<br>$\pm 0.028$          |
|                 | BACC     | 0.038<br>$\pm 0.010$        | 0.036<br>$\pm 0.007$        | <b>0.040</b><br>$\pm 0.008$ | 0.037<br>$\pm 0.009$ | 0.036<br>$\pm 0.007$ | 0.029<br>$\pm 0.007$  | 0.026<br>$\pm 0.005$ | 0.036<br>$\pm 0.006$ | 0.029<br>$\pm 0.003$ | 0.032<br>$\pm 0.009$   | 0.034<br>$\pm 0.008$   | 0.027<br>$\pm 0.004$ | 0.040<br>$\pm 0.009$ | 0.035<br>$\pm 0.008$  | 0.026<br>$\pm 0.004$  | 0.035<br>$\pm 0.008$          | 0.028<br>$\pm 0.009$          |
|                 | Acc.1    | 0.038<br>$\pm 0.010$        | 0.036<br>$\pm 0.007$        | <b>0.040</b><br>$\pm 0.008$ | 0.037<br>$\pm 0.009$ | 0.036<br>$\pm 0.007$ | 0.029<br>$\pm 0.007$  | 0.026<br>$\pm 0.005$ | 0.036<br>$\pm 0.006$ | 0.029<br>$\pm 0.003$ | 0.032<br>$\pm 0.009$   | 0.034<br>$\pm 0.008$   | 0.027<br>$\pm 0.004$ | 0.040<br>$\pm 0.009$ | 0.035<br>$\pm 0.008$  | 0.026<br>$\pm 0.004$  | 0.035<br>$\pm 0.009$          | 0.028<br>$\pm 0.009$          |
|                 | Acc.2    | 0.074<br>$\pm 0.014$        | 0.071<br>$\pm 0.012$        | <b>0.078</b><br>$\pm 0.013$ | 0.070<br>$\pm 0.016$ | 0.070<br>$\pm 0.012$ | 0.057<br>$\pm 0.011$  | 0.053<br>$\pm 0.007$ | 0.069<br>$\pm 0.010$ | 0.057<br>$\pm 0.006$ | 0.063<br>$\pm 0.012$   | 0.066<br>$\pm 0.012$   | 0.053<br>$\pm 0.005$ | 0.078<br>$\pm 0.013$ | 0.071<br>$\pm 0.012$  | 0.053<br>$\pm 0.006$  | 0.068<br>$\pm 0.012$          | 0.056<br>$\pm 0.012$          |
|                 |          |                             |                             |                             |                      |                      |                       |                      |                      |                      |                        |                        |                      |                      |                       |                       |                               |                               |
| Subject11_async | $\kappa$ | 0.013<br>$\pm 0.007$        | 0.011<br>$\pm 0.008$        | <b>0.012</b><br>$\pm 0.009$ | 0.011<br>$\pm 0.009$ | 0.008<br>$\pm 0.007$ | 0.005<br>$\pm 0.006$  | 0.003<br>$\pm 0.005$ | 0.009<br>$\pm 0.005$ | 0.001<br>$\pm 0.004$ | 0.007<br>$\pm 0.008$   | 0.005<br>$\pm 0.006$   | 0.002<br>$\pm 0.004$ | 0.006<br>$\pm 0.005$ | 0.004<br>$\pm 0.006$  | 0.002<br>$\pm 0.004$  | 0.001<br>$\pm 0.007$          | 0.001<br>$\pm 0.008$          |
|                 | AUC      | 0.564<br>$\pm 0.022$        | 0.554<br>$\pm 0.022$        | <b>0.559</b><br>$\pm 0.026$ | 0.551<br>$\pm 0.026$ | 0.542<br>$\pm 0.018$ | 0.512<br>$\pm 0.013$  | 0.509<br>$\pm 0.013$ | 0.530<br>$\pm 0.015$ | 0.506<br>$\pm 0.008$ | 0.531<br>$\pm 0.016$   | 0.539<br>$\pm 0.020$   | 0.509<br>$\pm 0.010$ | 0.526<br>$\pm 0.015$ | 0.515<br>$\pm 0.013$  | 0.509<br>$\pm 0.010$  | 0.510<br>$\pm 0.015$          | 0.516<br>$\pm 0.019$          |
|                 | BACC     | 0.038<br>$\pm 0.007$        | 0.036<br>$\pm 0.008$        | <b>0.037</b><br>$\pm 0.008$ | 0.035<br>$\pm 0.009$ | 0.032<br>$\pm 0.007$ | 0.029<br>$\pm 0.005$  | 0.028<br>$\pm 0.005$ | 0.033<br>$\pm 0.005$ | 0.026<br>$\pm 0.004$ | 0.032<br>$\pm 0.008$   | 0.030<br>$\pm 0.006$   | 0.027<br>$\pm 0.004$ | 0.031<br>$\pm 0.005$ | 0.029<br>$\pm 0.006$  | 0.027<br>$\pm 0.004$  | 0.026<br>$\pm 0.007$          | 0.026<br>$\pm 0.007$          |
|                 | Acc.1    | 0.038<br>$\pm 0.007$        | 0.036<br>$\pm 0.008$        | <b>0.037</b><br>$\pm 0.008$ | 0.035<br>$\pm 0.009$ | 0.032<br>$\pm 0.007$ | 0.030<br>$\pm 0.006$  | 0.028<br>$\pm 0.005$ | 0.034<br>$\pm 0.005$ | 0.026<br>$\pm 0.004$ | 0.032<br>$\pm 0.008$   | 0.030<br>$\pm 0.006$   | 0.027<br>$\pm 0.004$ | 0.031<br>$\pm 0.005$ | 0.029<br>$\pm 0.006$  | 0.027<br>$\pm 0.004$  | 0.026<br>$\pm 0.007$          | 0.027<br>$\pm 0.007$          |
|                 | Acc.2    | <b>0.073</b><br>$\pm 0.011$ | 0.071<br>$\pm 0.011$        | 0.074<br>$\pm 0.013$        | 0.068<br>$\pm 0.013$ | 0.064<br>$\pm 0.010$ | 0.058<br>$\pm 0.010$  | 0.055<br>$\pm 0.008$ | 0.064<br>$\pm 0.008$ | 0.052<br>$\pm 0.005$ | 0.061<br>$\pm 0.011$   | 0.060<br>$\pm 0.010$   | 0.053<br>$\pm 0.006$ | 0.059<br>$\pm 0.007$ | 0.056<br>$\pm 0.010$  | 0.053<br>$\pm 0.006$  | 0.052<br>$\pm 0.009$          | 0.054<br>$\pm 0.010$          |
|                 |          |                             |                             |                             |                      |                      |                       |                      |                      |                      |                        |                        |                      |                      |                       |                       |                               |                               |
| Subject12_async | $\kappa$ | 0.011<br>$\pm 0.008$        | <b>0.013</b><br>$\pm 0.007$ | 0.014<br>$\pm 0.010$        | 0.009<br>$\pm 0.007$ | 0.009<br>$\pm 0.006$ | -0.000<br>$\pm 0.005$ | 0.001<br>$\pm 0.005$ | 0.009<br>$\pm 0.005$ | 0.004<br>$\pm 0.004$ | 0.010<br>$\pm 0.008$   | 0.009<br>$\pm 0.007$   | 0.002<br>$\pm 0.003$ | 0.010<br>$\pm 0.005$ | 0.010<br>$\pm 0.009$  | 0.002<br>$\pm 0.004$  | 0.003<br>$\pm 0.007$          | -0.001<br>$\pm 0.007$         |
|                 | AUC      | 0.567<br>$\pm 0.027$        | <b>0.564</b><br>$\pm 0.026$ | 0.561<br>$\pm 0.025$        | 0.554<br>$\pm 0.027$ | 0.549<br>$\pm 0.022$ | 0.506<br>$\pm 0.012$  | 0.501<br>$\pm 0.012$ | 0.532<br>$\pm 0.014$ | 0.515<br>$\pm 0.009$ | 0.534<br>$\pm 0.018$   | 0.542<br>$\pm 0.019$   | 0.507<br>$\pm 0.007$ | 0.559<br>$\pm 0.020$ | 0.527<br>$\pm 0.019$  | 0.503<br>$\pm 0.011$  | 0.526<br>$\pm 0.019$          | 0.501<br>$\pm 0.017$          |
|                 | BACC     | 0.036<br>$\pm 0.008$        | <b>0.037</b><br>$\pm 0.007$ | 0.039<br>$\pm 0.010$        | 0.034<br>$\pm 0.006$ | 0.033<br>$\pm 0.006$ | 0.025<br>$\pm 0.005$  | 0.026<br>$\pm 0.005$ | 0.034<br>$\pm 0.005$ | 0.029<br>$\pm 0.004$ | 0.034<br>$\pm 0.007$   | 0.034<br>$\pm 0.006$   | 0.027<br>$\pm 0.003$ | 0.035<br>$\pm 0.005$ | 0.035<br>$\pm 0.009$  | 0.027<br>$\pm 0.004$  | 0.028<br>$\pm 0.007$          | 0.024<br>$\pm 0.007$          |
|                 | Acc.1    | 0.036<br>$\pm 0.008$        | <b>0.037</b><br>$\pm 0.007$ | 0.039<br>$\pm 0.010$        | 0.034<br>$\pm 0.006$ | 0.033<br>$\pm 0.006$ | 0.025<br>$\pm 0.005$  | 0.026<br>$\pm 0.005$ | 0.034<br>$\pm 0.005$ | 0.029<br>$\pm 0.004$ | 0.035<br>$\pm 0.007$   | 0.034<br>$\pm 0.007$   | 0.027<br>$\pm 0.003$ | 0.035<br>$\pm 0.005$ | 0.035<br>$\pm 0.009$  | 0.026<br>$\pm 0.004$  | 0.028<br>$\pm 0.007$          | 0.024<br>$\pm 0.007$          |
|                 | Acc.2    | 0.071<br>$\pm 0.012$        | <b>0.072</b><br>$\pm 0.011$ | 0.075<br>$\pm 0.014$        | 0.066<br>$\pm 0.010$ | 0.067<br>$\pm 0.012$ | 0.052<br>$\pm 0.008$  | 0.051<br>$\pm 0.007$ | 0.067<br>$\pm 0.009$ | 0.056<br>$\pm 0.006$ | 0.067<br>$\pm 0.013$   | 0.067<br>$\pm 0.011$   | 0.054<br>$\pm 0.004$ | 0.068<br>$\pm 0.008$ | 0.052<br>$\pm 0.013$  | 0.052<br>$\pm 0.005$  | 0.055<br>$\pm 0.011$          | 0.050<br>$\pm 0.008$          |
|                 |          |                             |                             |                             |                      |                      |                       |                      |                      |                      |                        |                        |                      |                      |                       |                       |                               |                               |

Continued on next page

| Subject         | Metric   | DeepConvnet                 | EEGNet               | Conformer                   | CTNet                       | SSVEPDNN             | BIOT <sup>(f)</sup>  | BIOT <sup>(l)</sup>   | BENDR <sup>(f)</sup>        | BENDR <sup>(l)</sup> | CBraMod <sup>(f)</sup> | CBraMod <sup>(l)</sup> | EEGPT <sup>(f)</sup> | EEGPT <sup>(l)</sup> | LaBraM <sup>(f)</sup> | LaBraM <sup>(l)</sup> | STEEGformer-s <sup>(f)</sup> | STEEGformer-s <sup>(l)</sup> |
|-----------------|----------|-----------------------------|----------------------|-----------------------------|-----------------------------|----------------------|----------------------|-----------------------|-----------------------------|----------------------|------------------------|------------------------|----------------------|----------------------|-----------------------|-----------------------|------------------------------|------------------------------|
| Subject13_async | $\kappa$ | 0.013<br>$\pm 0.010$        | 0.011<br>$\pm 0.009$ | 0.012<br>$\pm 0.009$        | <b>0.028</b><br>$\pm 0.029$ | 0.010<br>$\pm 0.009$ | 0.007<br>$\pm 0.011$ | 0.001<br>$\pm 0.006$  | 0.016<br>$\pm 0.008$        | 0.005<br>$\pm 0.005$ | 0.014<br>$\pm 0.009$   | 0.004<br>$\pm 0.006$   | 0.006<br>$\pm 0.006$ | 0.053<br>$\pm 0.056$ | 0.011<br>$\pm 0.009$  | 0.000<br>$\pm 0.003$  | 0.014<br>$\pm 0.012$         | 0.004<br>$\pm 0.006$         |
|                 | AUC      | 0.572<br>$\pm 0.028$        | 0.556<br>$\pm 0.021$ | 0.568<br>$\pm 0.026$        | <b>0.622</b><br>$\pm 0.071$ | 0.547<br>$\pm 0.024$ | 0.527<br>$\pm 0.022$ | 0.508<br>$\pm 0.017$  | 0.544<br>$\pm 0.017$        | 0.526<br>$\pm 0.013$ | 0.553<br>$\pm 0.020$   | 0.527<br>$\pm 0.019$   | 0.526<br>$\pm 0.016$ | 0.674<br>$\pm 0.087$ | 0.556<br>$\pm 0.022$  | 0.503<br>$\pm 0.012$  | 0.551<br>$\pm 0.027$         | 0.542<br>$\pm 0.034$         |
|                 | BAcc     | 0.038<br>$\pm 0.009$        | 0.036<br>$\pm 0.008$ | 0.037<br>$\pm 0.009$        | <b>0.052</b><br>$\pm 0.028$ | 0.034<br>$\pm 0.008$ | 0.032<br>$\pm 0.011$ | 0.026<br>$\pm 0.006$  | 0.041<br>$\pm 0.008$        | 0.030<br>$\pm 0.005$ | 0.039<br>$\pm 0.009$   | 0.028<br>$\pm 0.006$   | 0.031<br>$\pm 0.005$ | 0.076<br>$\pm 0.054$ | 0.036<br>$\pm 0.009$  | 0.025<br>$\pm 0.003$  | 0.038<br>$\pm 0.011$         | 0.029<br>$\pm 0.006$         |
|                 | Acc.1    | 0.038<br>$\pm 0.009$        | 0.036<br>$\pm 0.008$ | 0.037<br>$\pm 0.009$        | <b>0.052</b><br>$\pm 0.028$ | 0.034<br>$\pm 0.008$ | 0.032<br>$\pm 0.010$ | 0.026<br>$\pm 0.006$  | 0.041<br>$\pm 0.008$        | 0.030<br>$\pm 0.005$ | 0.039<br>$\pm 0.009$   | 0.029<br>$\pm 0.006$   | 0.031<br>$\pm 0.005$ | 0.076<br>$\pm 0.054$ | 0.036<br>$\pm 0.009$  | 0.025<br>$\pm 0.003$  | 0.038<br>$\pm 0.011$         | 0.029<br>$\pm 0.006$         |
|                 | Acc.2    | 0.073<br>$\pm 0.015$        | 0.070<br>$\pm 0.012$ | 0.074<br>$\pm 0.014$        | <b>0.098</b><br>$\pm 0.045$ | 0.067<br>$\pm 0.012$ | 0.061<br>$\pm 0.014$ | 0.051<br>$\pm 0.009$  | 0.078<br>$\pm 0.013$        | 0.058<br>$\pm 0.006$ | 0.075<br>$\pm 0.015$   | 0.056<br>$\pm 0.008$   | 0.059<br>$\pm 0.008$ | 0.134<br>$\pm 0.080$ | 0.071<br>$\pm 0.015$  | 0.050<br>$\pm 0.005$  | 0.074<br>$\pm 0.020$         | 0.057<br>$\pm 0.010$         |
|                 |          |                             |                      |                             |                             |                      |                      |                       |                             |                      |                        |                        |                      |                      |                       |                       |                              |                              |
| Subject14_async | $\kappa$ | 0.010<br>$\pm 0.006$        | 0.015<br>$\pm 0.009$ | 0.014<br>$\pm 0.009$        | <b>0.033</b><br>$\pm 0.035$ | 0.019<br>$\pm 0.010$ | 0.011<br>$\pm 0.012$ | 0.003<br>$\pm 0.006$  | 0.019<br>$\pm 0.007$        | 0.005<br>$\pm 0.004$ | 0.012<br>$\pm 0.008$   | 0.015<br>$\pm 0.010$   | 0.006<br>$\pm 0.006$ | 0.045<br>$\pm 0.039$ | 0.017<br>$\pm 0.011$  | 0.001<br>$\pm 0.004$  | 0.014<br>$\pm 0.011$         | 0.004<br>$\pm 0.008$         |
|                 | AUC      | 0.582<br>$\pm 0.030$        | 0.572<br>$\pm 0.029$ | 0.579<br>$\pm 0.028$        | <b>0.632</b><br>$\pm 0.079$ | 0.564<br>$\pm 0.029$ | 0.536<br>$\pm 0.024$ | 0.514<br>$\pm 0.015$  | 0.554<br>$\pm 0.018$        | 0.526<br>$\pm 0.010$ | 0.542<br>$\pm 0.016$   | 0.566<br>$\pm 0.025$   | 0.525<br>$\pm 0.017$ | 0.671<br>$\pm 0.081$ | 0.542<br>$\pm 0.023$  | 0.516<br>$\pm 0.017$  | 0.546<br>$\pm 0.026$         | 0.542<br>$\pm 0.032$         |
|                 | BAcc     | 0.035<br>$\pm 0.006$        | 0.039<br>$\pm 0.008$ | 0.039<br>$\pm 0.008$        | <b>0.058</b><br>$\pm 0.034$ | 0.043<br>$\pm 0.010$ | 0.036<br>$\pm 0.011$ | 0.028<br>$\pm 0.006$  | 0.043<br>$\pm 0.007$        | 0.030<br>$\pm 0.004$ | 0.037<br>$\pm 0.008$   | 0.039<br>$\pm 0.010$   | 0.031<br>$\pm 0.006$ | 0.069<br>$\pm 0.038$ | 0.042<br>$\pm 0.010$  | 0.026<br>$\pm 0.004$  | 0.039<br>$\pm 0.011$         | 0.029<br>$\pm 0.007$         |
|                 | Acc.1    | 0.035<br>$\pm 0.006$        | 0.039<br>$\pm 0.008$ | 0.039<br>$\pm 0.008$        | <b>0.058</b><br>$\pm 0.034$ | 0.043<br>$\pm 0.010$ | 0.035<br>$\pm 0.011$ | 0.027<br>$\pm 0.006$  | 0.044<br>$\pm 0.007$        | 0.030<br>$\pm 0.004$ | 0.036<br>$\pm 0.008$   | 0.041<br>$\pm 0.010$   | 0.031<br>$\pm 0.006$ | 0.068<br>$\pm 0.038$ | 0.042<br>$\pm 0.011$  | 0.026<br>$\pm 0.004$  | 0.038<br>$\pm 0.011$         | 0.028<br>$\pm 0.007$         |
|                 | Acc.2    | 0.070<br>$\pm 0.009$        | 0.076<br>$\pm 0.015$ | 0.080<br>$\pm 0.014$        | <b>0.107</b><br>$\pm 0.055$ | 0.079<br>$\pm 0.014$ | 0.067<br>$\pm 0.016$ | 0.055<br>$\pm 0.009$  | 0.084<br>$\pm 0.013$        | 0.059<br>$\pm 0.007$ | 0.070<br>$\pm 0.011$   | 0.077<br>$\pm 0.015$   | 0.060<br>$\pm 0.009$ | 0.126<br>$\pm 0.061$ | 0.080<br>$\pm 0.019$  | 0.053<br>$\pm 0.006$  | 0.072<br>$\pm 0.018$         | 0.056<br>$\pm 0.011$         |
|                 |          |                             |                      |                             |                             |                      |                      |                       |                             |                      |                        |                        |                      |                      |                       |                       |                              |                              |
| Subject15_async | $\kappa$ | 0.015<br>$\pm 0.008$        | 0.012<br>$\pm 0.008$ | <b>0.019</b><br>$\pm 0.008$ | 0.016<br>$\pm 0.012$        | 0.014<br>$\pm 0.008$ | 0.007<br>$\pm 0.007$ | 0.002<br>$\pm 0.006$  | 0.015<br>$\pm 0.007$        | 0.003<br>$\pm 0.004$ | 0.004<br>$\pm 0.008$   | 0.005<br>$\pm 0.007$   | 0.001<br>$\pm 0.005$ | 0.023<br>$\pm 0.012$ | 0.001<br>$\pm 0.004$  | -0.000<br>$\pm 0.003$ | 0.006<br>$\pm 0.007$         | 0.001<br>$\pm 0.005$         |
|                 | AUC      | <b>0.580</b><br>$\pm 0.027$ | 0.561<br>$\pm 0.028$ | 0.571<br>$\pm 0.023$        | 0.576<br>$\pm 0.035$        | 0.557<br>$\pm 0.028$ | 0.522<br>$\pm 0.023$ | 0.507<br>$\pm 0.014$  | 0.546<br>$\pm 0.020$        | 0.515<br>$\pm 0.007$ | 0.526<br>$\pm 0.016$   | 0.519<br>$\pm 0.013$   | 0.510<br>$\pm 0.013$ | 0.606<br>$\pm 0.040$ | 0.504<br>$\pm 0.010$  | 0.502<br>$\pm 0.010$  | 0.534<br>$\pm 0.015$         | 0.516<br>$\pm 0.016$         |
|                 | BAcc     | 0.039<br>$\pm 0.008$        | 0.037<br>$\pm 0.007$ | <b>0.044</b><br>$\pm 0.008$ | 0.041<br>$\pm 0.012$        | 0.039<br>$\pm 0.008$ | 0.032<br>$\pm 0.007$ | 0.027<br>$\pm 0.006$  | 0.039<br>$\pm 0.007$        | 0.028<br>$\pm 0.004$ | 0.029<br>$\pm 0.008$   | 0.030<br>$\pm 0.007$   | 0.026<br>$\pm 0.005$ | 0.047<br>$\pm 0.011$ | 0.026<br>$\pm 0.004$  | 0.025<br>$\pm 0.003$  | 0.031<br>$\pm 0.007$         | 0.026<br>$\pm 0.005$         |
|                 | Acc.1    | 0.039<br>$\pm 0.008$        | 0.037<br>$\pm 0.007$ | <b>0.044</b><br>$\pm 0.008$ | 0.041<br>$\pm 0.012$        | 0.039<br>$\pm 0.008$ | 0.032<br>$\pm 0.007$ | 0.027<br>$\pm 0.006$  | 0.040<br>$\pm 0.007$        | 0.028<br>$\pm 0.004$ | 0.029<br>$\pm 0.008$   | 0.030<br>$\pm 0.007$   | 0.026<br>$\pm 0.005$ | 0.047<br>$\pm 0.011$ | 0.026<br>$\pm 0.004$  | 0.024<br>$\pm 0.003$  | 0.031<br>$\pm 0.007$         | 0.026<br>$\pm 0.005$         |
|                 | Acc.2    | 0.076<br>$\pm 0.014$        | 0.073<br>$\pm 0.012$ | <b>0.084</b><br>$\pm 0.012$ | 0.078<br>$\pm 0.017$        | 0.074<br>$\pm 0.013$ | 0.061<br>$\pm 0.012$ | 0.053<br>$\pm 0.009$  | 0.076<br>$\pm 0.014$        | 0.057<br>$\pm 0.005$ | 0.058<br>$\pm 0.011$   | 0.057<br>$\pm 0.009$   | 0.053<br>$\pm 0.006$ | 0.091<br>$\pm 0.019$ | 0.052<br>$\pm 0.005$  | 0.049<br>$\pm 0.005$  | 0.060<br>$\pm 0.010$         | 0.052<br>$\pm 0.008$         |
|                 |          |                             |                      |                             |                             |                      |                      |                       |                             |                      |                        |                        |                      |                      |                       |                       |                              |                              |
| Subject16_async |          | 0.012<br>$\pm 0.007$        | 0.013<br>$\pm 0.010$ | 0.018<br>$\pm 0.009$        | 0.014<br>$\pm 0.009$        | 0.012<br>$\pm 0.009$ | 0.006<br>$\pm 0.009$ | -0.000<br>$\pm 0.006$ | <b>0.016</b><br>$\pm 0.009$ | 0.003<br>$\pm 0.003$ | 0.011<br>$\pm 0.008$   | 0.008<br>$\pm 0.007$   | 0.003<br>$\pm 0.004$ | 0.016<br>$\pm 0.008$ | 0.008<br>$\pm 0.008$  | 0.000<br>$\pm 0.004$  | 0.006<br>$\pm 0.007$         | -0.000<br>$\pm 0.006$        |

Continued on next page

| Subject         | Metric   | DeepConvnet     | EEGNet                         | Conformer        | CTNet                          | SSVEPDNN        | BIOT <sup>(f)</sup>            | BIOT <sup>(l)</sup> | BENDR <sup>(f)</sup>           | BENDR <sup>(l)</sup> | CBraMod <sup>(f)</sup> | CBraMod <sup>(l)</sup> | EEGPT <sup>(f)</sup> | EEGPT <sup>(l)</sup>           | LaBraM <sup>(f)</sup> | LaBraM <sup>(l)</sup> | STEEGformer-s <sup>(f)</sup> | STEEGformer-s <sup>(l)</sup> |
|-----------------|----------|-----------------|--------------------------------|------------------|--------------------------------|-----------------|--------------------------------|---------------------|--------------------------------|----------------------|------------------------|------------------------|----------------------|--------------------------------|-----------------------|-----------------------|------------------------------|------------------------------|
| Subject17_async | AUC      | 0.577<br>±0.029 | 0.561<br>±0.031                | 0.570<br>±0.026  | <b>0.588</b><br>± <b>0.039</b> | 0.562<br>±0.029 | 0.520<br>±0.017                | 0.506<br>±0.014     | 0.548<br>±0.020                | 0.513<br>±0.007      | 0.544<br>±0.021        | 0.542<br>±0.019        | 0.509<br>±0.011      | 0.591<br>± 0.030               | 0.532<br>±0.019       | 0.504<br>±0.012       | 0.539<br>±0.019              | 0.517<br>±0.018              |
|                 |          | 0.037<br>±0.007 | 0.038<br>±0.010                | 0.043<br>± 0.009 | 0.038<br>±0.008                | 0.037<br>±0.009 | 0.031<br>±0.009                | 0.025<br>±0.006     | <b>0.041</b><br>± <b>0.008</b> | 0.028<br>±0.003      | 0.036<br>±0.008        | 0.033<br>±0.007        | 0.028<br>±0.004      | 0.041<br>±0.008                | 0.033<br>±0.008       | 0.025<br>±0.003       | 0.031<br>±0.007              | 0.025<br>±0.006              |
|                 | Acc.1    | 0.037<br>±0.007 | 0.038<br>±0.010                | 0.043<br>± 0.009 | 0.038<br>±0.008                | 0.037<br>±0.009 | 0.031<br>±0.009                | 0.025<br>±0.006     | <b>0.041</b><br>± <b>0.009</b> | 0.028<br>±0.003      | 0.036<br>±0.008        | 0.033<br>±0.007        | 0.028<br>±0.004      | 0.041<br>±0.008                | 0.033<br>±0.008       | 0.025<br>±0.003       | 0.030<br>±0.007              | 0.025<br>±0.006              |
|                 |          | 0.071<br>±0.011 | 0.073<br>±0.015                | 0.083<br>± 0.014 | 0.076<br>±0.013                | 0.074<br>±0.016 | 0.059<br>±0.013                | 0.050<br>±0.008     | <b>0.079</b><br>± <b>0.014</b> | 0.057<br>±0.005      | 0.069<br>±0.013        | 0.064<br>±0.011        | 0.055<br>±0.006      | 0.078<br>±0.013                | 0.064<br>±0.013       | 0.050<br>±0.006       | 0.060<br>±0.011              | 0.051<br>±0.007              |
|                 | $\kappa$ | 0.014<br>±0.008 | 0.010<br>±0.009                | 0.013<br>±0.006  | <b>0.017</b><br>± <b>0.014</b> | 0.013<br>±0.010 | 0.012<br>±0.015                | 0.002<br>±0.006     | 0.011<br>±0.006                | 0.003<br>±0.004      | 0.007<br>±0.007        | 0.008<br>±0.008        | 0.003<br>±0.005      | 0.027<br>± 0.033               | 0.008<br>±0.007       | 0.001<br>±0.004       | 0.003<br>±0.007              | 0.001<br>±0.006              |
|                 |          | 0.567<br>±0.025 | 0.554<br>±0.029                | 0.556<br>±0.021  | <b>0.594</b><br>± <b>0.047</b> | 0.554<br>±0.027 | 0.537<br>±0.029                | 0.517<br>±0.019     | 0.538<br>±0.014                | 0.510<br>±0.008      | 0.530<br>±0.020        | 0.546<br>±0.021        | 0.511<br>±0.013      | 0.601<br>± 0.086               | 0.538<br>±0.018       | 0.504<br>±0.011       | 0.521<br>±0.022              | 0.511<br>±0.020              |
|                 | BAcc     | 0.038<br>±0.008 | 0.035<br>±0.009                | 0.038<br>±0.006  | <b>0.041</b><br>± <b>0.014</b> | 0.038<br>±0.010 | 0.036<br>±0.014                | 0.027<br>±0.006     | 0.036<br>±0.006                | 0.028<br>±0.004      | 0.032<br>±0.006        | 0.032<br>±0.008        | 0.028<br>±0.005      | 0.052<br>± 0.032               | 0.033<br>±0.007       | 0.026<br>±0.004       | 0.028<br>±0.007              | 0.026<br>±0.006              |
|                 |          | 0.038<br>±0.008 | 0.035<br>±0.009                | 0.038<br>±0.006  | <b>0.041</b><br>± <b>0.014</b> | 0.038<br>±0.010 | 0.036<br>±0.014                | 0.027<br>±0.006     | 0.036<br>±0.006                | 0.028<br>±0.004      | 0.032<br>±0.007        | 0.032<br>±0.008        | 0.028<br>±0.004      | 0.052<br>± 0.032               | 0.034<br>±0.007       | 0.027<br>±0.004       | 0.028<br>±0.007              | 0.026<br>±0.006              |
|                 | Acc.2    | 0.073<br>±0.012 | 0.067<br>±0.012                | 0.074<br>±0.011  | <b>0.081</b><br>± <b>0.021</b> | 0.072<br>±0.015 | 0.067<br>±0.019                | 0.053<br>±0.008     | 0.069<br>±0.009                | 0.055<br>±0.004      | 0.061<br>±0.009        | 0.063<br>±0.012        | 0.055<br>±0.007      | 0.096<br>± 0.055               | 0.067<br>±0.012       | 0.052<br>±0.006       | 0.056<br>±0.011              | 0.051<br>±0.009              |
|                 |          | 0.017<br>±0.012 | 0.012<br>±0.008                | 0.015<br>±0.009  | 0.022<br>± 0.019               | 0.014<br>±0.010 | <b>0.022</b><br>± <b>0.024</b> | 0.007<br>±0.010     | 0.014<br>±0.008                | 0.002<br>±0.003      | 0.012<br>±0.010        | 0.012<br>±0.008        | 0.002<br>±0.005      | 0.020<br>±0.016                | 0.010<br>±0.011       | 0.003<br>±0.004       | 0.007<br>±0.007              | 0.003<br>±0.007              |
| Subject18_async | AUC      | 0.594<br>±0.035 | 0.560<br>±0.025                | 0.569<br>±0.027  | 0.619<br>± 0.057               | 0.555<br>±0.026 | 0.561<br>±0.043                | 0.530<br>±0.027     | 0.543<br>±0.020                | 0.515<br>±0.008      | 0.536<br>±0.022        | 0.558<br>±0.024        | 0.513<br>±0.013      | <b>0.618</b><br>± <b>0.043</b> | 0.529<br>±0.020       | 0.514<br>±0.014       | 0.535<br>±0.023              | 0.534<br>±0.022              |
|                 |          | 0.041<br>±0.012 | 0.036<br>±0.008                | 0.040<br>±0.009  | 0.047<br>± 0.019               | 0.039<br>±0.009 | <b>0.046</b><br>± <b>0.024</b> | 0.031<br>±0.009     | 0.039<br>±0.007                | 0.027<br>±0.003      | 0.037<br>±0.010        | 0.037<br>±0.008        | 0.027<br>±0.005      | 0.045<br>±0.015                | 0.035<br>±0.011       | 0.028<br>±0.004       | 0.032<br>±0.007              | 0.028<br>±0.007              |
|                 | BAcc     | 0.041<br>±0.012 | 0.036<br>±0.008                | 0.040<br>±0.009  | 0.047<br>± 0.019               | 0.039<br>±0.009 | <b>0.046</b><br>± <b>0.024</b> | 0.031<br>±0.009     | 0.039<br>±0.008                | 0.027<br>±0.003      | 0.037<br>±0.010        | 0.039<br>±0.008        | 0.027<br>±0.005      | 0.046<br>±0.016                | 0.036<br>±0.011       | 0.028<br>±0.004       | 0.033<br>±0.007              | 0.029<br>±0.007              |
|                 |          | 0.080<br>±0.017 | 0.072<br>±0.012                | 0.076<br>±0.014  | 0.088<br>± 0.030               | 0.074<br>±0.014 | 0.085<br>±0.036                | 0.062<br>±0.014     | 0.073<br>±0.012                | 0.055<br>±0.004      | 0.069<br>±0.017        | 0.074<br>±0.014        | 0.055<br>±0.007      | <b>0.086</b><br>± <b>0.024</b> | 0.070<br>±0.016       | 0.055<br>±0.007       | 0.062<br>±0.011              | 0.056<br>±0.010              |
|                 | Acc.2    | 0.013<br>±0.007 | 0.013<br>±0.009                | 0.018<br>± 0.008 | 0.010<br>±0.007                | 0.010<br>±0.007 | 0.003<br>±0.005                | 0.000<br>±0.005     | <b>0.014</b><br>± <b>0.007</b> | 0.005<br>±0.005      | 0.007<br>±0.008        | 0.006<br>±0.007        | 0.001<br>±0.005      | 0.010<br>±0.007                | 0.008<br>±0.007       | 0.002<br>±0.003       | 0.004<br>±0.011              | 0.002<br>±0.006              |
|                 |          | 0.572<br>±0.028 | <b>0.576</b><br>± <b>0.032</b> | 0.573<br>±0.028  | 0.560<br>±0.026                | 0.552<br>±0.024 | 0.517<br>±0.016                | 0.508<br>±0.015     | 0.543<br>±0.021                | 0.523<br>±0.009      | 0.535<br>±0.020        | 0.542<br>±0.020        | 0.507<br>±0.009      | 0.577<br>± 0.022               | 0.516<br>±0.013       | 0.511<br>±0.011       | 0.519<br>±0.023              | 0.531<br>±0.027              |

Continued on next page

| Subject         | Metric   | DeepConvnet                    | EEGNet          | Conformer       | CTNet                          | SSVEPDNN        | BIOT <sup>(f)</sup> | BIOT <sup>(l)</sup> | BENDR <sup>(f)</sup>           | BENDR <sup>(l)</sup> | CBraMod <sup>(f)</sup> | CBraMod <sup>(l)</sup> | EEGPT <sup>(f)</sup> | EEGPT <sup>(l)</sup>           | LaBraM <sup>(f)</sup> | LaBraM <sup>(l)</sup> | STEEGformer-s <sup>(f)</sup> | STEEGformer-s <sup>(l)</sup> |
|-----------------|----------|--------------------------------|-----------------|-----------------|--------------------------------|-----------------|---------------------|---------------------|--------------------------------|----------------------|------------------------|------------------------|----------------------|--------------------------------|-----------------------|-----------------------|------------------------------|------------------------------|
| Subject1.async  | BAcc     | 0.038<br>±0.007                | 0.038<br>±0.009 | 0.042<br>±0.008 | 0.034<br>±0.007                | 0.035<br>±0.007 | 0.028<br>±0.005     | 0.025<br>±0.005     | <b>0.038</b><br>± <b>0.007</b> | 0.029<br>±0.004      | 0.031<br>±0.007        | 0.031<br>±0.007        | 0.026<br>±0.004      | 0.035<br>±0.007                | 0.033<br>±0.007       | 0.027<br>±0.003       | 0.029<br>±0.010              | 0.027<br>±0.005              |
|                 |          | 0.038<br>±0.007                | 0.038<br>±0.009 | 0.042<br>±0.008 | 0.034<br>±0.007                | 0.035<br>±0.007 | 0.028<br>±0.005     | 0.026<br>±0.005     | <b>0.039</b><br>± <b>0.007</b> | 0.029<br>±0.004      | 0.032<br>±0.008        | 0.032<br>±0.006        | 0.026<br>±0.005      | 0.035<br>±0.007                | 0.033<br>±0.007       | 0.029<br>±0.004       | 0.029<br>±0.011              | 0.028<br>±0.005              |
|                 | Acc.1    | 0.073<br>±0.010                | 0.074<br>±0.015 | 0.081<br>±0.013 | 0.067<br>±0.011                | 0.068<br>±0.010 | 0.056<br>±0.010     | 0.051<br>±0.008     | <b>0.075</b><br>± <b>0.012</b> | 0.058<br>±0.006      | 0.062<br>±0.012        | 0.064<br>±0.009        | 0.053<br>±0.007      | 0.071<br>±0.011                | 0.062<br>±0.009       | 0.057<br>±0.005       | 0.060<br>±0.016              | 0.055<br>±0.010              |
|                 |          | 0.073<br>±0.010                | 0.074<br>±0.015 | 0.081<br>±0.013 | 0.067<br>±0.011                | 0.068<br>±0.010 | 0.056<br>±0.010     | 0.051<br>±0.008     | <b>0.075</b><br>± <b>0.012</b> | 0.058<br>±0.006      | 0.062<br>±0.012        | 0.064<br>±0.009        | 0.053<br>±0.007      | 0.071<br>±0.011                | 0.062<br>±0.009       | 0.057<br>±0.005       | 0.060<br>±0.016              | 0.055<br>±0.010              |
|                 | $\kappa$ | <b>0.013</b><br>± <b>0.010</b> | 0.009<br>±0.009 | 0.009<br>±0.005 | 0.013<br>±0.012                | 0.007<br>±0.006 | 0.003<br>±0.007     | 0.000<br>±0.007     | 0.007<br>±0.006                | 0.002<br>±0.004      | 0.010<br>±0.008        | 0.009<br>±0.007        | 0.002<br>±0.004      | 0.009<br>±0.006                | 0.008<br>±0.009       | 0.002<br>±0.005       | 0.007<br>±0.008              | 0.003<br>±0.005              |
|                 |          | 0.569<br>±0.033                | 0.550<br>±0.019 | 0.550<br>±0.017 | <b>0.568</b><br>± <b>0.032</b> | 0.533<br>±0.018 | 0.509<br>±0.018     | 0.507<br>±0.016     | 0.523<br>±0.011                | 0.510<br>±0.006      | 0.537<br>±0.017        | 0.537<br>±0.023        | 0.507<br>±0.009      | 0.553<br>±0.023                | 0.524<br>±0.018       | 0.509<br>±0.017       | 0.519<br>±0.021              | 0.530<br>±0.027              |
|                 | BAcc     | <b>0.038</b><br>± <b>0.009</b> | 0.034<br>±0.009 | 0.034<br>±0.005 | 0.038<br>±0.011                | 0.031<br>±0.006 | 0.027<br>±0.007     | 0.025<br>±0.006     | 0.031<br>±0.006                | 0.027<br>±0.003      | 0.035<br>±0.007        | 0.034<br>±0.007        | 0.027<br>±0.004      | 0.034<br>±0.006                | 0.033<br>±0.009       | 0.027<br>±0.005       | 0.032<br>±0.008              | 0.028<br>±0.005              |
|                 |          | <b>0.038</b><br>± <b>0.009</b> | 0.034<br>±0.009 | 0.034<br>±0.005 | 0.038<br>±0.011                | 0.031<br>±0.006 | 0.027<br>±0.007     | 0.025<br>±0.007     | 0.032<br>±0.006                | 0.027<br>±0.004      | 0.035<br>±0.007        | 0.034<br>±0.007        | 0.027<br>±0.004      | 0.034<br>±0.006                | 0.033<br>±0.009       | 0.027<br>±0.005       | 0.032<br>±0.008              | 0.028<br>±0.005              |
|                 | Acc.1    | <b>0.070</b><br>± <b>0.015</b> | 0.067<br>±0.012 | 0.067<br>±0.008 | 0.073<br>±0.017                | 0.061<br>±0.010 | 0.054<br>±0.012     | 0.051<br>±0.008     | 0.061<br>±0.009                | 0.054<br>±0.005      | 0.066<br>±0.011        | 0.067<br>±0.011        | 0.052<br>±0.005      | 0.067<br>±0.011                | 0.065<br>±0.013       | 0.053<br>±0.007       | 0.062<br>±0.012              | 0.056<br>±0.008              |
|                 |          | <b>0.070</b><br>± <b>0.015</b> | 0.067<br>±0.012 | 0.067<br>±0.008 | 0.073<br>±0.017                | 0.061<br>±0.010 | 0.054<br>±0.012     | 0.051<br>±0.008     | 0.061<br>±0.009                | 0.054<br>±0.005      | 0.066<br>±0.011        | 0.067<br>±0.011        | 0.052<br>±0.005      | 0.067<br>±0.011                | 0.065<br>±0.013       | 0.053<br>±0.007       | 0.062<br>±0.012              | 0.056<br>±0.008              |
| Subject20.async | $\kappa$ | 0.017<br>±0.009                | 0.017<br>±0.008 | 0.016<br>±0.009 | 0.037<br>±0.039                | 0.018<br>±0.010 | 0.014<br>±0.016     | 0.006<br>±0.008     | 0.018<br>±0.009                | 0.005<br>±0.004      | 0.012<br>±0.009        | 0.011<br>±0.007        | 0.007<br>±0.009      | <b>0.034</b><br>± <b>0.036</b> | 0.019<br>±0.017       | 0.002<br>±0.004       | 0.008<br>±0.009              | 0.004<br>±0.007              |
|                 |          | 0.590<br>±0.029                | 0.583<br>±0.031 | 0.563<br>±0.025 | <b>0.638</b><br>± <b>0.075</b> | 0.577<br>±0.035 | 0.546<br>±0.034     | 0.521<br>±0.023     | 0.556<br>±0.022                | 0.522<br>±0.009      | 0.551<br>±0.025        | 0.559<br>±0.026        | 0.529<br>±0.021      | 0.647<br>±0.070                | 0.547<br>±0.036       | 0.513<br>±0.014       | 0.531<br>±0.025              | 0.542<br>±0.027              |
|                 | BAcc     | 0.041<br>±0.009                | 0.041<br>±0.008 | 0.041<br>±0.009 | 0.061<br>±0.038                | 0.043<br>±0.010 | 0.039<br>±0.015     | 0.030<br>±0.008     | 0.043<br>±0.009                | 0.030<br>±0.004      | 0.036<br>±0.008        | 0.036<br>±0.007        | 0.031<br>±0.009      | <b>0.058</b><br>± <b>0.035</b> | 0.043<br>±0.016       | 0.027<br>±0.004       | 0.033<br>±0.008              | 0.029<br>±0.007              |
|                 |          | 0.041<br>±0.009                | 0.041<br>±0.008 | 0.041<br>±0.009 | <b>0.061</b><br>± <b>0.038</b> | 0.043<br>±0.010 | 0.040<br>±0.015     | 0.032<br>±0.008     | 0.043<br>±0.009                | 0.030<br>±0.004      | 0.038<br>±0.009        | 0.038<br>±0.007        | 0.033<br>±0.009      | 0.061<br>±0.036                | 0.045<br>±0.017       | 0.028<br>±0.004       | 0.035<br>±0.009              | 0.030<br>±0.007              |
|                 | Acc.1    | 0.077<br>±0.013                | 0.081<br>±0.014 | 0.079<br>±0.016 | 0.109<br>±0.059                | 0.083<br>±0.017 | 0.077<br>±0.026     | 0.061<br>±0.013     | 0.083<br>±0.017                | 0.059<br>±0.005      | 0.071<br>±0.013        | 0.073<br>±0.012        | 0.063<br>±0.013      | <b>0.106</b><br>± <b>0.053</b> | 0.083<br>±0.028       | 0.056<br>±0.005       | 0.066<br>±0.015              | 0.058<br>±0.012              |
|                 |          | 0.077<br>±0.013                | 0.081<br>±0.014 | 0.079<br>±0.016 | 0.109<br>±0.059                | 0.083<br>±0.017 | 0.077<br>±0.026     | 0.061<br>±0.013     | 0.083<br>±0.017                | 0.059<br>±0.005      | 0.071<br>±0.013        | 0.073<br>±0.012        | 0.063<br>±0.013      | <b>0.106</b><br>± <b>0.053</b> | 0.083<br>±0.028       | 0.056<br>±0.005       | 0.066<br>±0.015              | 0.058<br>±0.012              |
| Subject21.async | $\kappa$ | 0.011<br>±0.009                | 0.009<br>±0.008 | 0.012<br>±0.009 | <b>0.037</b><br>± <b>0.030</b> | 0.008<br>±0.007 | 0.008<br>±0.011     | 0.003<br>±0.005     | 0.012<br>±0.007                | 0.004<br>±0.005      | 0.007<br>±0.008        | -0.001<br>±0.003       | 0.003<br>±0.005      | 0.042<br>±0.042                | 0.001<br>±0.003       | 0.001<br>±0.002       | 0.015<br>±0.012              | 0.004<br>±0.007              |
|                 |          | 0.572<br>±0.027                | 0.548<br>±0.028 | 0.561<br>±0.026 | <b>0.645</b><br>± <b>0.078</b> | 0.545<br>±0.025 | 0.529<br>±0.027     | 0.514<br>±0.016     | 0.541<br>±0.021                | 0.521<br>±0.009      | 0.526<br>±0.015        | 0.515<br>±0.018        | 0.516<br>±0.014      | 0.658<br>±0.085                | 0.509<br>±0.009       | 0.507<br>±0.010       | 0.552<br>±0.027              | 0.543<br>±0.030              |
|                 | BAcc     | 0.036<br>±0.009                | 0.034<br>±0.008 | 0.037<br>±0.009 | <b>0.061</b><br>± <b>0.030</b> | 0.033<br>±0.007 | 0.033<br>±0.011     | 0.028<br>±0.005     | 0.037<br>±0.007                | 0.029<br>±0.005      | 0.032<br>±0.007        | 0.024<br>±0.003        | 0.028<br>±0.004      | 0.066<br>±0.041                | 0.026<br>±0.003       | 0.026<br>±0.002       | 0.039<br>±0.012              | 0.029<br>±0.007              |
|                 |          | 0.036<br>±0.009                | 0.034<br>±0.008 | 0.037<br>±0.009 | <b>0.061</b><br>± <b>0.030</b> | 0.033<br>±0.007 | 0.033<br>±0.011     | 0.028<br>±0.005     | 0.037<br>±0.007                | 0.029<br>±0.005      | 0.032<br>±0.007        | 0.024<br>±0.003        | 0.028<br>±0.004      | 0.066<br>±0.041                | 0.026<br>±0.003       | 0.026<br>±0.002       | 0.039<br>±0.012              | 0.029<br>±0.007              |

Continued on next page

| Subject         | Metric | DeepConvnet                    | EEGNet          | Conformer                      | CTNet                          | SSVEPDNN        | BIOT (f)        | BIOT (l)        | BENDR (f)       | BENDR (l)       | CBraMod (f)     | CBraMod (l)     | EEGPT (f)       | EEGPT (l)                      | LaBraM (f)      | LaBraM (l)      | STEEGformer-s (f) | STEEGformer-s (l) |
|-----------------|--------|--------------------------------|-----------------|--------------------------------|--------------------------------|-----------------|-----------------|-----------------|-----------------|-----------------|-----------------|-----------------|-----------------|--------------------------------|-----------------|-----------------|-------------------|-------------------|
| Subject22_async | Acc.1  | 0.036<br>±0.009                | 0.034<br>±0.008 | 0.037<br>±0.009                | <b>0.061</b><br>± <b>0.030</b> | 0.033<br>±0.007 | 0.032<br>±0.011 | 0.028<br>±0.005 | 0.037<br>±0.007 | 0.029<br>±0.005 | 0.032<br>±0.007 | 0.023<br>±0.003 | 0.028<br>±0.004 | <div>0.066<br/>± 0.041</div>   | 0.025<br>±0.003 | 0.025<br>±0.002 | 0.039<br>±0.012   | 0.028<br>±0.007   |
|                 |        | 0.070<br>±0.014                | 0.068<br>±0.012 | 0.075<br>±0.017                | <b>0.113</b><br>± <b>0.051</b> | 0.065<br>±0.012 | 0.063<br>±0.016 | 0.056<br>±0.008 | 0.073<br>±0.011 | 0.057<br>±0.006 | 0.061<br>±0.011 | 0.049<br>±0.004 | 0.057<br>±0.007 | <div>0.121<br/>± 0.065</div>   | 0.052<br>±0.004 | 0.049<br>±0.004 | 0.076<br>±0.018   | 0.058<br>±0.011   |
|                 | AUC    | 0.014<br>±0.009                | 0.013<br>±0.009 | 0.019<br>±0.009                | <div>0.050<br/>± 0.049</div>   | 0.014<br>±0.011 | 0.021<br>±0.024 | 0.010<br>±0.014 | 0.017<br>±0.011 | 0.004<br>±0.005 | 0.008<br>±0.009 | 0.009<br>±0.009 | 0.007<br>±0.010 | <b>0.039</b><br>± <b>0.046</b> | 0.019<br>±0.016 | 0.002<br>±0.004 | 0.009<br>±0.008   | 0.005<br>±0.008   |
|                 |        | 0.578<br>±0.029                | 0.565<br>±0.030 | 0.573<br>±0.029                | <div>0.666<br/>± 0.089</div>   | 0.562<br>±0.024 | 0.558<br>±0.042 | 0.540<br>±0.040 | 0.551<br>±0.022 | 0.519<br>±0.010 | 0.533<br>±0.021 | 0.555<br>±0.025 | 0.524<br>±0.026 | <b>0.646</b><br>± <b>0.083</b> | 0.554<br>±0.031 | 0.519<br>±0.018 | 0.544<br>±0.020   | 0.542<br>±0.029   |
|                 | BAcc   | 0.038<br>±0.009                | 0.038<br>±0.009 | 0.043<br>±0.009                | <div>0.074<br/>± 0.048</div>   | 0.038<br>±0.011 | 0.045<br>±0.023 | 0.035<br>±0.013 | 0.042<br>±0.010 | 0.029<br>±0.005 | 0.033<br>±0.009 | 0.034<br>±0.009 | 0.032<br>±0.010 | <b>0.063</b><br>± <b>0.045</b> | 0.044<br>±0.016 | 0.027<br>±0.004 | 0.034<br>±0.008   | 0.030<br>±0.008   |
|                 |        | 0.038<br>±0.009                | 0.038<br>±0.009 | 0.043<br>±0.009                | <div>0.074<br/>± 0.048</div>   | 0.038<br>±0.011 | 0.045<br>±0.023 | 0.035<br>±0.013 | 0.042<br>±0.011 | 0.029<br>±0.005 | 0.033<br>±0.009 | 0.034<br>±0.009 | 0.032<br>±0.010 | <b>0.063</b><br>± <b>0.045</b> | 0.043<br>±0.016 | 0.027<br>±0.004 | 0.034<br>±0.008   | 0.030<br>±0.008   |
| Subject23_async | Acc.1  | 0.073<br>±0.012                | 0.075<br>±0.014 | 0.084<br>±0.016                | <div>0.135<br/>± 0.079</div>   | 0.074<br>±0.016 | 0.084<br>±0.035 | 0.068<br>±0.024 | 0.081<br>±0.017 | 0.058<br>±0.007 | 0.064<br>±0.012 | 0.067<br>±0.015 | 0.062<br>±0.015 | <b>0.115</b><br>± <b>0.073</b> | 0.080<br>±0.026 | 0.055<br>±0.006 | 0.066<br>±0.013   | 0.057<br>±0.011   |
|                 |        | 0.013<br>±0.008                | 0.011<br>±0.008 | <b>0.015</b><br>± <b>0.008</b> | 0.008<br>±0.008                | 0.011<br>±0.008 | 0.002<br>±0.006 | 0.002<br>±0.005 | 0.014<br>±0.008 | 0.003<br>±0.003 | 0.009<br>±0.008 | 0.011<br>±0.009 | 0.003<br>±0.004 | <div>0.017<br/>± 0.009</div>   | 0.013<br>±0.009 | 0.002<br>±0.003 | 0.010<br>±0.009   | 0.005<br>±0.006   |
|                 | AUC    | <b>0.570</b><br>± <b>0.027</b> | 0.556<br>±0.028 | 0.561<br>±0.022                | 0.562<br>±0.027                | 0.552<br>±0.025 | 0.510<br>±0.014 | 0.506<br>±0.012 | 0.542<br>±0.018 | 0.518<br>±0.010 | 0.540<br>±0.018 | 0.550<br>±0.023 | 0.509<br>±0.010 | <div>0.592<br/>± 0.029</div>   | 0.545<br>±0.016 | 0.509<br>±0.014 | 0.538<br>±0.019   | 0.522<br>±0.023   |
|                 |        | 0.038<br>±0.008                | 0.036<br>±0.007 | <b>0.040</b><br>± <b>0.008</b> | 0.033<br>±0.008                | 0.036<br>±0.008 | 0.027<br>±0.005 | 0.027<br>±0.005 | 0.039<br>±0.008 | 0.028<br>±0.003 | 0.034<br>±0.007 | 0.036<br>±0.009 | 0.028<br>±0.004 | <div>0.042<br/>± 0.009</div>   | 0.038<br>±0.009 | 0.027<br>±0.003 | 0.035<br>±0.009   | 0.030<br>±0.006   |
|                 | Acc.1  | 0.038<br>±0.008                | 0.036<br>±0.007 | <b>0.040</b><br>± <b>0.008</b> | 0.033<br>±0.008                | 0.036<br>±0.008 | 0.027<br>±0.006 | 0.027<br>±0.005 | 0.039<br>±0.008 | 0.028<br>±0.003 | 0.033<br>±0.008 | 0.036<br>±0.009 | 0.028<br>±0.004 | <div>0.042<br/>± 0.009</div>   | 0.038<br>±0.009 | 0.026<br>±0.003 | 0.034<br>±0.009   | 0.029<br>±0.006   |
|                 |        | 0.071<br>±0.014                | 0.071<br>±0.012 | <b>0.076</b><br>± <b>0.012</b> | 0.066<br>±0.012                | 0.070<br>±0.012 | 0.052<br>±0.006 | 0.053<br>±0.008 | 0.075<br>±0.013 | 0.057<br>±0.006 | 0.065<br>±0.012 | 0.068<br>±0.014 | 0.053<br>±0.005 | <div>0.079<br/>± 0.013</div>   | 0.073<br>±0.013 | 0.053<br>±0.006 | 0.066<br>±0.012   | 0.056<br>±0.009   |
| Subject24_async | Acc.1  | 0.013<br>±0.010                | 0.013<br>±0.009 | <b>0.015</b><br>± <b>0.009</b> | 0.012<br>±0.011                | 0.010<br>±0.007 | 0.011<br>±0.012 | 0.003<br>±0.006 | 0.013<br>±0.008 | 0.002<br>±0.004 | 0.006<br>±0.008 | 0.011<br>±0.009 | 0.003<br>±0.005 | <div>0.019<br/>± 0.011</div>   | 0.012<br>±0.010 | 0.002<br>±0.004 | 0.009<br>±0.010   | 0.004<br>±0.009   |
|                 |        | <b>0.571</b><br>± <b>0.027</b> | 0.549<br>±0.026 | 0.557<br>±0.026                | 0.566<br>±0.035                | 0.548<br>±0.024 | 0.528<br>±0.024 | 0.512<br>±0.014 | 0.535<br>±0.018 | 0.511<br>±0.008 | 0.528<br>±0.017 | 0.543<br>±0.023 | 0.514<br>±0.013 | <div>0.601<br/>± 0.036</div>   | 0.534<br>±0.018 | 0.509<br>±0.011 | 0.528<br>±0.023   | 0.531<br>±0.023   |
|                 | BAcc   | 0.038<br>±0.010                | 0.037<br>±0.008 | <b>0.040</b><br>± <b>0.009</b> | 0.036<br>±0.011                | 0.034<br>±0.007 | 0.036<br>±0.011 | 0.028<br>±0.006 | 0.038<br>±0.007 | 0.027<br>±0.004 | 0.031<br>±0.008 | 0.036<br>±0.009 | 0.028<br>±0.004 | <div>0.044<br/>± 0.011</div>   | 0.037<br>±0.010 | 0.027<br>±0.004 | 0.034<br>±0.010   | 0.029<br>±0.009   |
|                 |        | 0.038<br>±0.010                | 0.037<br>±0.008 | <b>0.040</b><br>± <b>0.009</b> | 0.036<br>±0.011                | 0.034<br>±0.007 | 0.036<br>±0.011 | 0.028<br>±0.006 | 0.038<br>±0.007 | 0.027<br>±0.004 | 0.031<br>±0.008 | 0.038<br>±0.010 | 0.028<br>±0.004 | <div>0.045<br/>± 0.012</div>   | 0.037<br>±0.010 | 0.027<br>±0.004 | 0.036<br>±0.010   | 0.029<br>±0.008   |
|                 | Acc.1  | 0.038<br>±0.010                | 0.037<br>±0.008 | <b>0.040</b><br>± <b>0.009</b> | 0.036<br>±0.011                | 0.034<br>±0.007 | 0.036<br>±0.011 | 0.028<br>±0.006 | 0.038<br>±0.007 | 0.027<br>±0.004 | 0.031<br>±0.008 | 0.038<br>±0.010 | 0.028<br>±0.004 | <div>0.045<br/>± 0.012</div>   | 0.037<br>±0.010 | 0.027<br>±0.004 | 0.036<br>±0.010   | 0.029<br>±0.008   |
|                 |        | 0.038<br>±0.010                | 0.037<br>±0.008 | <b>0.040</b><br>± <b>0.009</b> | 0.036<br>±0.011                | 0.034<br>±0.007 | 0.036<br>±0.011 | 0.028<br>±0.006 | 0.038<br>±0.007 | 0.027<br>±0.004 | 0.031<br>±0.008 | 0.038<br>±0.010 | 0.028<br>±0.004 | <div>0.045<br/>± 0.012</div>   | 0.037<br>±0.010 | 0.027<br>±0.004 | 0.036<br>±0.010   | 0.029<br>±0.008   |

Continued on next page

| Subject         | Metric   | DeepConvnet     | EEGNet          | Conformer                      | CTNet                          | SSVEPDNN        | BIOT (f)        | BIOT (l)        | BENDR (f)       | BENDR (l)       | CBraMod (f)                    | CBraMod (l)                    | EEGPT (f)       | EEGPT (l)                      | LaBraM (f)      | LaBraM (l)       | STEEGformer-s (f) | STEEGformer-s (l) |
|-----------------|----------|-----------------|-----------------|--------------------------------|--------------------------------|-----------------|-----------------|-----------------|-----------------|-----------------|--------------------------------|--------------------------------|-----------------|--------------------------------|-----------------|------------------|-------------------|-------------------|
|                 | Acc.2    | 0.072<br>±0.014 | 0.071<br>±0.012 | <b>0.076</b><br>± <b>0.014</b> | 0.070<br>±0.017                | 0.068<br>±0.011 | 0.067<br>±0.019 | 0.056<br>±0.008 | 0.073<br>±0.012 | 0.054<br>±0.005 | 0.063<br>±0.013                | 0.071<br>±0.015                | 0.055<br>±0.006 | 0.085<br>± 0.019               | 0.071<br>±0.016 | 0.054<br>±0.005  | 0.068<br>±0.015   | 0.058<br>±0.010   |
| Subject25_async | $\kappa$ | 0.003<br>±0.006 | 0.001<br>±0.005 | 0.003<br>±0.007                | 0.001<br>±0.006                | 0.003<br>±0.005 | 0.004<br>±0.006 | 0.000<br>±0.006 | 0.003<br>±0.004 | 0.001<br>±0.004 | 0.007<br>±0.008                | 0.010<br>± 0.010               | 0.005<br>±0.004 | <b>0.007</b><br>± <b>0.007</b> | 0.006<br>±0.008 | 0.002<br>±0.004  | 0.004<br>±0.008   | 0.002<br>±0.005   |
|                 | AUC      | 0.526<br>±0.013 | 0.520<br>±0.015 | 0.522<br>±0.016                | 0.508<br>±0.015                | 0.512<br>±0.012 | 0.508<br>±0.013 | 0.502<br>±0.013 | 0.512<br>±0.013 | 0.501<br>±0.007 | 0.523<br>±0.019                | <b>0.542</b><br>± <b>0.026</b> | 0.524<br>±0.013 | 0.564<br>± 0.028               | 0.520<br>±0.018 | 0.509<br>±0.012  | 0.513<br>±0.018   | 0.520<br>±0.016   |
|                 | BAcc     | 0.028<br>±0.006 | 0.026<br>±0.005 | 0.028<br>±0.007                | 0.026<br>±0.006                | 0.028<br>±0.005 | 0.029<br>±0.006 | 0.025<br>±0.005 | 0.028<br>±0.004 | 0.026<br>±0.003 | 0.032<br>±0.008                | 0.035<br>± 0.009               | 0.029<br>±0.004 | <b>0.032</b><br>± <b>0.007</b> | 0.030<br>±0.008 | 0.027<br>±0.004  | 0.029<br>±0.008   | 0.027<br>±0.005   |
|                 | Acc.1    | 0.028<br>±0.006 | 0.026<br>±0.005 | 0.028<br>±0.007                | 0.026<br>±0.006                | 0.028<br>±0.005 | 0.029<br>±0.006 | 0.025<br>±0.005 | 0.028<br>±0.004 | 0.026<br>±0.003 | 0.031<br>±0.008                | 0.035<br>± 0.009               | 0.029<br>±0.004 | <b>0.032</b><br>± <b>0.007</b> | 0.030<br>±0.008 | 0.026<br>±0.004  | 0.028<br>±0.007   | 0.027<br>±0.005   |
|                 | Acc.2    | 0.055<br>±0.009 | 0.054<br>±0.008 | 0.055<br>±0.010                | 0.050<br>±0.008                | 0.056<br>±0.008 | 0.055<br>±0.008 | 0.050<br>±0.007 | 0.055<br>±0.007 | 0.051<br>±0.005 | <b>0.063</b><br>± <b>0.012</b> | 0.067<br>± 0.014               | 0.058<br>±0.007 | 0.062<br>±0.009                | 0.059<br>±0.011 | 0.051<br>±0.005  | 0.056<br>±0.010   | 0.053<br>±0.007   |
|                 | $\kappa$ | 0.011<br>±0.008 | 0.015<br>±0.009 | 0.016<br>±0.008                | 0.027<br>± 0.022               | 0.012<br>±0.008 | 0.005<br>±0.010 | 0.004<br>±0.007 | 0.014<br>±0.006 | 0.004<br>±0.003 | 0.010<br>±0.007                | 0.012<br>±0.008                | 0.003<br>±0.004 | <b>0.019</b><br>± <b>0.014</b> | 0.013<br>±0.010 | 0.002<br>±0.004  | 0.007<br>±0.007   | 0.003<br>±0.006   |
| Subject26_async | AUC      | 0.583<br>±0.030 | 0.572<br>±0.028 | 0.571<br>±0.024                | 0.616<br>± 0.063               | 0.549<br>±0.022 | 0.525<br>±0.023 | 0.521<br>±0.023 | 0.545<br>±0.018 | 0.522<br>±0.010 | 0.540<br>±0.018                | 0.562<br>±0.022                | 0.509<br>±0.008 | <b>0.614</b><br>± <b>0.041</b> | 0.540<br>±0.023 | 0.512<br>±0.012  | 0.549<br>±0.018   | 0.527<br>±0.018   |
|                 | BAcc     | 0.036<br>±0.008 | 0.039<br>±0.009 | 0.041<br>±0.008                | 0.051<br>± 0.021               | 0.037<br>±0.008 | 0.030<br>±0.009 | 0.029<br>±0.007 | 0.038<br>±0.006 | 0.029<br>±0.003 | 0.035<br>±0.007                | 0.037<br>±0.008                | 0.028<br>±0.004 | <b>0.043</b><br>± <b>0.014</b> | 0.038<br>±0.010 | 0.027<br>±0.004  | 0.032<br>±0.006   | 0.028<br>±0.006   |
|                 | Acc.1    | 0.036<br>±0.008 | 0.039<br>±0.009 | 0.041<br>±0.008                | 0.051<br>± 0.021               | 0.037<br>±0.008 | 0.029<br>±0.009 | 0.028<br>±0.006 | 0.039<br>±0.006 | 0.029<br>±0.003 | 0.035<br>±0.007                | 0.037<br>±0.008                | 0.028<br>±0.004 | <b>0.043</b><br>± <b>0.013</b> | 0.037<br>±0.009 | 0.026<br>±0.004  | 0.031<br>±0.006   | 0.028<br>±0.006   |
|                 | Acc.2    | 0.069<br>±0.012 | 0.076<br>±0.014 | 0.080<br>±0.012                | 0.095<br>± 0.035               | 0.071<br>±0.012 | 0.058<br>±0.014 | 0.057<br>±0.010 | 0.074<br>±0.011 | 0.057<br>±0.005 | 0.069<br>±0.012                | 0.072<br>±0.012                | 0.054<br>±0.007 | <b>0.081</b><br>± <b>0.020</b> | 0.070<br>±0.015 | 0.053<br>±0.006  | 0.060<br>±0.008   | 0.054<br>±0.009   |
|                 | $\kappa$ | 0.011<br>±0.008 | 0.013<br>±0.007 | 0.019<br>± 0.008               | 0.016<br>±0.013                | 0.012<br>±0.007 | 0.004<br>±0.007 | 0.001<br>±0.006 | 0.014<br>±0.007 | 0.003<br>±0.003 | 0.010<br>±0.009                | 0.009<br>±0.009                | 0.002<br>±0.005 | <b>0.019</b><br>± <b>0.011</b> | 0.006<br>±0.008 | -0.001<br>±0.005 | 0.003<br>±0.008   | 0.001<br>±0.006   |
|                 | AUC      | 0.568<br>±0.032 | 0.565<br>±0.026 | 0.575<br>±0.028                | <b>0.582</b><br>± <b>0.048</b> | 0.554<br>±0.020 | 0.507<br>±0.017 | 0.502<br>±0.013 | 0.545<br>±0.018 | 0.515<br>±0.008 | 0.541<br>±0.018                | 0.552<br>±0.027                | 0.511<br>±0.011 | 0.594<br>± 0.034               | 0.534<br>±0.022 | 0.499<br>±0.015  | 0.522<br>±0.018   | 0.504<br>±0.015   |
| Subject27_async | BAcc     | 0.036<br>±0.008 | 0.037<br>±0.007 | 0.043<br>± 0.007               | 0.041<br>±0.012                | 0.037<br>±0.007 | 0.029<br>±0.007 | 0.026<br>±0.006 | 0.038<br>±0.007 | 0.028<br>±0.003 | 0.034<br>±0.009                | 0.034<br>±0.009                | 0.027<br>±0.004 | <b>0.043</b><br>± <b>0.010</b> | 0.031<br>±0.008 | 0.024<br>±0.005  | 0.028<br>±0.008   | 0.026<br>±0.005   |
|                 | Acc.1    | 0.036<br>±0.008 | 0.037<br>±0.007 | <b>0.043</b><br>± <b>0.007</b> | 0.041<br>±0.012                | 0.037<br>±0.007 | 0.029<br>±0.007 | 0.026<br>±0.006 | 0.039<br>±0.007 | 0.028<br>±0.003 | 0.034<br>±0.009                | 0.034<br>±0.009                | 0.027<br>±0.004 | 0.044<br>± 0.011               | 0.031<br>±0.008 | 0.024<br>±0.004  | 0.028<br>±0.008   | 0.027<br>±0.006   |
|                 | Acc.2    | 0.070<br>±0.013 | 0.072<br>±0.012 | <b>0.082</b><br>± <b>0.011</b> | 0.078<br>±0.022                | 0.072<br>±0.011 | 0.057<br>±0.010 | 0.051<br>±0.008 | 0.076<br>±0.012 | 0.056<br>±0.004 | 0.067<br>±0.013                | 0.068<br>±0.012                | 0.054<br>±0.008 | 0.083<br>± 0.016               | 0.065<br>±0.013 | 0.049<br>±0.006  | 0.054<br>±0.010   | 0.053<br>±0.010   |

Continued on next page



| Subject         | Metric   | DeepConvnet                 | EEGNet                      | Conformer                   | CTNet                | SSVEPDNN             | BIOT (f)             | BIOT (l)              | BENDR (f)                   | BENDR (l)            | CBraMod (f)          | CBraMod (l)          | EEGPT (f)            | EEGPT (l)            | LaBraM (f)           | LaBraM (l)           | STEEGformer-s (f)    | STEEGformer-s (l)     |
|-----------------|----------|-----------------------------|-----------------------------|-----------------------------|----------------------|----------------------|----------------------|-----------------------|-----------------------------|----------------------|----------------------|----------------------|----------------------|----------------------|----------------------|----------------------|----------------------|-----------------------|
| Subject28_async | $\kappa$ | 0.011<br>$\pm 0.008$        | <b>0.013</b><br>$\pm 0.008$ | 0.015<br>$\pm 0.009$        | 0.010<br>$\pm 0.006$ | 0.012<br>$\pm 0.008$ | 0.007<br>$\pm 0.006$ | -0.000<br>$\pm 0.004$ | 0.012<br>$\pm 0.008$        | 0.003<br>$\pm 0.003$ | 0.005<br>$\pm 0.007$ | 0.001<br>$\pm 0.004$ | 0.001<br>$\pm 0.004$ | 0.010<br>$\pm 0.006$ | 0.005<br>$\pm 0.006$ | 0.001<br>$\pm 0.004$ | 0.002<br>$\pm 0.006$ | 0.001<br>$\pm 0.006$  |
|                 | AUC      | 0.571<br>$\pm 0.032$        | 0.567<br>$\pm 0.024$        | <b>0.574</b><br>$\pm 0.030$ | 0.579<br>$\pm 0.035$ | 0.556<br>$\pm 0.025$ | 0.517<br>$\pm 0.016$ | 0.507<br>$\pm 0.014$  | 0.540<br>$\pm 0.017$        | 0.514<br>$\pm 0.008$ | 0.518<br>$\pm 0.018$ | 0.510<br>$\pm 0.014$ | 0.508<br>$\pm 0.010$ | 0.567<br>$\pm 0.027$ | 0.521<br>$\pm 0.014$ | 0.506<br>$\pm 0.012$ | 0.512<br>$\pm 0.014$ | 0.529<br>$\pm 0.029$  |
|                 | BAcc     | 0.036<br>$\pm 0.008$        | <b>0.037</b><br>$\pm 0.007$ | 0.040<br>$\pm 0.009$        | 0.035<br>$\pm 0.006$ | 0.036<br>$\pm 0.007$ | 0.032<br>$\pm 0.006$ | 0.025<br>$\pm 0.004$  | 0.036<br>$\pm 0.008$        | 0.028<br>$\pm 0.003$ | 0.030<br>$\pm 0.006$ | 0.026<br>$\pm 0.004$ | 0.026<br>$\pm 0.004$ | 0.035<br>$\pm 0.006$ | 0.030<br>$\pm 0.006$ | 0.026<br>$\pm 0.004$ | 0.027<br>$\pm 0.006$ | 0.026<br>$\pm 0.005$  |
|                 | Acc.1    | 0.036<br>$\pm 0.008$        | <b>0.037</b><br>$\pm 0.007$ | 0.040<br>$\pm 0.009$        | 0.035<br>$\pm 0.006$ | 0.036<br>$\pm 0.007$ | 0.031<br>$\pm 0.006$ | 0.025<br>$\pm 0.004$  | 0.037<br>$\pm 0.008$        | 0.028<br>$\pm 0.003$ | 0.031<br>$\pm 0.006$ | 0.026<br>$\pm 0.004$ | 0.026<br>$\pm 0.004$ | 0.036<br>$\pm 0.006$ | 0.030<br>$\pm 0.006$ | 0.025<br>$\pm 0.004$ | 0.027<br>$\pm 0.006$ | 0.026<br>$\pm 0.005$  |
|                 | Acc.2    | 0.071<br>$\pm 0.012$        | <b>0.073</b><br>$\pm 0.011$ | 0.078<br>$\pm 0.016$        | 0.070<br>$\pm 0.010$ | 0.071<br>$\pm 0.011$ | 0.060<br>$\pm 0.010$ | 0.050<br>$\pm 0.006$  | 0.072<br>$\pm 0.012$        | 0.054<br>$\pm 0.004$ | 0.060<br>$\pm 0.009$ | 0.051<br>$\pm 0.005$ | 0.052<br>$\pm 0.006$ | 0.069<br>$\pm 0.010$ | 0.060<br>$\pm 0.008$ | 0.051<br>$\pm 0.005$ | 0.056<br>$\pm 0.010$ | 0.053<br>$\pm 0.009$  |
|                 |          |                             |                             |                             |                      |                      |                      |                       |                             |                      |                      |                      |                      |                      |                      |                      |                      |                       |
| Subject29_async | $\kappa$ | 0.004<br>$\pm 0.006$        | 0.004<br>$\pm 0.007$        | <b>0.010</b><br>$\pm 0.009$ | 0.002<br>$\pm 0.006$ | 0.003<br>$\pm 0.006$ | 0.002<br>$\pm 0.006$ | 0.001<br>$\pm 0.004$  | 0.004<br>$\pm 0.005$        | 0.001<br>$\pm 0.004$ | 0.007<br>$\pm 0.009$ | 0.007<br>$\pm 0.010$ | 0.002<br>$\pm 0.004$ | 0.010<br>$\pm 0.009$ | 0.006<br>$\pm 0.009$ | 0.001<br>$\pm 0.004$ | 0.004<br>$\pm 0.009$ | -0.001<br>$\pm 0.006$ |
|                 | AUC      | 0.525<br>$\pm 0.017$        | 0.519<br>$\pm 0.013$        | <b>0.552</b><br>$\pm 0.031$ | 0.516<br>$\pm 0.015$ | 0.515<br>$\pm 0.020$ | 0.505<br>$\pm 0.012$ | 0.500<br>$\pm 0.014$  | 0.518<br>$\pm 0.013$        | 0.505<br>$\pm 0.007$ | 0.522<br>$\pm 0.019$ | 0.538<br>$\pm 0.033$ | 0.507<br>$\pm 0.010$ | 0.565<br>$\pm 0.034$ | 0.522<br>$\pm 0.019$ | 0.502<br>$\pm 0.012$ | 0.526<br>$\pm 0.023$ | 0.509<br>$\pm 0.017$  |
|                 | BAcc     | 0.028<br>$\pm 0.006$        | 0.029<br>$\pm 0.007$        | <b>0.035</b><br>$\pm 0.009$ | 0.027<br>$\pm 0.006$ | 0.028<br>$\pm 0.006$ | 0.027<br>$\pm 0.006$ | 0.026<br>$\pm 0.004$  | 0.029<br>$\pm 0.005$        | 0.026<br>$\pm 0.004$ | 0.031<br>$\pm 0.009$ | 0.032<br>$\pm 0.010$ | 0.027<br>$\pm 0.004$ | 0.035<br>$\pm 0.008$ | 0.031<br>$\pm 0.009$ | 0.026<br>$\pm 0.004$ | 0.029<br>$\pm 0.009$ | 0.024<br>$\pm 0.006$  |
|                 | Acc.1    | 0.028<br>$\pm 0.006$        | 0.029<br>$\pm 0.007$        | <b>0.035</b><br>$\pm 0.009$ | 0.027<br>$\pm 0.006$ | 0.028<br>$\pm 0.006$ | 0.027<br>$\pm 0.006$ | 0.026<br>$\pm 0.004$  | 0.029<br>$\pm 0.005$        | 0.026<br>$\pm 0.004$ | 0.032<br>$\pm 0.009$ | 0.032<br>$\pm 0.010$ | 0.027<br>$\pm 0.004$ | 0.036<br>$\pm 0.009$ | 0.031<br>$\pm 0.009$ | 0.026<br>$\pm 0.004$ | 0.029<br>$\pm 0.009$ | 0.024<br>$\pm 0.006$  |
|                 | Acc.2    | 0.057<br>$\pm 0.010$        | 0.058<br>$\pm 0.009$        | <b>0.069</b><br>$\pm 0.014$ | 0.053<br>$\pm 0.009$ | 0.056<br>$\pm 0.009$ | 0.053<br>$\pm 0.007$ | 0.053<br>$\pm 0.007$  | 0.056<br>$\pm 0.007$        | 0.052<br>$\pm 0.005$ | 0.062<br>$\pm 0.015$ | 0.064<br>$\pm 0.016$ | 0.053<br>$\pm 0.006$ | 0.070<br>$\pm 0.013$ | 0.061<br>$\pm 0.014$ | 0.051<br>$\pm 0.006$ | 0.057<br>$\pm 0.015$ | 0.049<br>$\pm 0.008$  |
|                 |          |                             |                             |                             |                      |                      |                      |                       |                             |                      |                      |                      |                      |                      |                      |                      |                      |                       |
| Subject2_async  | $\kappa$ | <b>0.014</b><br>$\pm 0.008$ | 0.014<br>$\pm 0.008$        | 0.015<br>$\pm 0.007$        | 0.013<br>$\pm 0.009$ | 0.010<br>$\pm 0.007$ | 0.004<br>$\pm 0.007$ | 0.001<br>$\pm 0.006$  | 0.010<br>$\pm 0.007$        | 0.001<br>$\pm 0.004$ | 0.006<br>$\pm 0.008$ | 0.010<br>$\pm 0.007$ | 0.002<br>$\pm 0.004$ | 0.010<br>$\pm 0.006$ | 0.010<br>$\pm 0.011$ | 0.002<br>$\pm 0.004$ | 0.006<br>$\pm 0.009$ | 0.001<br>$\pm 0.007$  |
|                 | AUC      | <b>0.578</b><br>$\pm 0.024$ | 0.560<br>$\pm 0.024$        | 0.564<br>$\pm 0.022$        | 0.582<br>$\pm 0.030$ | 0.541<br>$\pm 0.022$ | 0.513<br>$\pm 0.012$ | 0.505<br>$\pm 0.015$  | 0.534<br>$\pm 0.014$        | 0.506<br>$\pm 0.006$ | 0.533<br>$\pm 0.019$ | 0.545<br>$\pm 0.026$ | 0.510<br>$\pm 0.009$ | 0.551<br>$\pm 0.022$ | 0.529<br>$\pm 0.016$ | 0.507<br>$\pm 0.013$ | 0.514<br>$\pm 0.016$ | 0.524<br>$\pm 0.025$  |
|                 | BAcc     | <b>0.038</b><br>$\pm 0.008$ | 0.038<br>$\pm 0.007$        | 0.040<br>$\pm 0.007$        | 0.037<br>$\pm 0.009$ | 0.035<br>$\pm 0.007$ | 0.029<br>$\pm 0.007$ | 0.026<br>$\pm 0.006$  | 0.035<br>$\pm 0.006$        | 0.026<br>$\pm 0.004$ | 0.031<br>$\pm 0.008$ | 0.035<br>$\pm 0.007$ | 0.027<br>$\pm 0.004$ | 0.035<br>$\pm 0.005$ | 0.035<br>$\pm 0.011$ | 0.027<br>$\pm 0.004$ | 0.031<br>$\pm 0.009$ | 0.026<br>$\pm 0.007$  |
|                 | Acc.1    | <b>0.038</b><br>$\pm 0.008$ | 0.038<br>$\pm 0.007$        | 0.040<br>$\pm 0.007$        | 0.037<br>$\pm 0.009$ | 0.035<br>$\pm 0.007$ | 0.029<br>$\pm 0.007$ | 0.026<br>$\pm 0.006$  | 0.035<br>$\pm 0.006$        | 0.026<br>$\pm 0.003$ | 0.031<br>$\pm 0.008$ | 0.036<br>$\pm 0.008$ | 0.027<br>$\pm 0.004$ | 0.036<br>$\pm 0.006$ | 0.036<br>$\pm 0.011$ | 0.027<br>$\pm 0.004$ | 0.031<br>$\pm 0.008$ | 0.026<br>$\pm 0.007$  |
|                 | Acc.2    | 0.072<br>$\pm 0.012$        | <b>0.074</b><br>$\pm 0.012$ | 0.077<br>$\pm 0.012$        | 0.073<br>$\pm 0.013$ | 0.067<br>$\pm 0.011$ | 0.056<br>$\pm 0.011$ | 0.052<br>$\pm 0.009$  | 0.068<br>$\pm 0.009$        | 0.052<br>$\pm 0.006$ | 0.061<br>$\pm 0.012$ | 0.068<br>$\pm 0.014$ | 0.052<br>$\pm 0.006$ | 0.067<br>$\pm 0.010$ | 0.067<br>$\pm 0.016$ | 0.053<br>$\pm 0.006$ | 0.060<br>$\pm 0.013$ | 0.050<br>$\pm 0.008$  |
|                 |          |                             |                             |                             |                      |                      |                      |                       |                             |                      |                      |                      |                      |                      |                      |                      |                      |                       |
| Subject30_async |          | 0.011<br>$\pm 0.008$        | 0.013<br>$\pm 0.010$        | 0.017<br>$\pm 0.011$        | 0.008<br>$\pm 0.010$ | 0.012<br>$\pm 0.008$ | 0.002<br>$\pm 0.007$ | 0.002<br>$\pm 0.005$  | <b>0.014</b><br>$\pm 0.008$ | 0.004<br>$\pm 0.004$ | 0.010<br>$\pm 0.011$ | 0.007<br>$\pm 0.006$ | 0.002<br>$\pm 0.004$ | 0.012<br>$\pm 0.010$ | 0.006<br>$\pm 0.007$ | 0.003<br>$\pm 0.005$ | 0.003<br>$\pm 0.007$ | 0.002<br>$\pm 0.006$  |

Continued on next page

| Subject         | Metric   | DeepConvnet          | EEGNet               | Conformer            | CTNet                | SSVEPDNN             | BIOT <sup>(f)</sup>  | BIOT <sup>(l)</sup>  | BENDR <sup>(f)</sup> | BENDR <sup>(l)</sup> | CBraMod <sup>(f)</sup> | CBraMod <sup>(l)</sup> | EEGPT <sup>(f)</sup> | EEGPT <sup>(l)</sup> | LaBraM <sup>(l)</sup> | LaBraM <sup>(l)</sup> | STEEGformer-s <sup>(f)</sup> | STEEGformer-s <sup>(l)</sup> |
|-----------------|----------|----------------------|----------------------|----------------------|----------------------|----------------------|----------------------|----------------------|----------------------|----------------------|------------------------|------------------------|----------------------|----------------------|-----------------------|-----------------------|------------------------------|------------------------------|
| Subject31_async | $\kappa$ | 0.566<br>$\pm 0.026$ | 0.565<br>$\pm 0.028$ | 0.565<br>$\pm 0.025$ | 0.563<br>$\pm 0.032$ | 0.544<br>$\pm 0.020$ | 0.510<br>$\pm 0.014$ | 0.503<br>$\pm 0.014$ | 0.542<br>$\pm 0.021$ | 0.519<br>$\pm 0.009$ | 0.542<br>$\pm 0.021$   | 0.551<br>$\pm 0.025$   | 0.507<br>$\pm 0.012$ | 0.590<br>$\pm 0.034$ | 0.537<br>$\pm 0.020$  | 0.505<br>$\pm 0.015$  | 0.534<br>$\pm 0.018$         | 0.518<br>$\pm 0.013$         |
|                 | AUC      | 0.036<br>$\pm 0.008$ | 0.038<br>$\pm 0.009$ | 0.041<br>$\pm 0.010$ | 0.033<br>$\pm 0.010$ | 0.037<br>$\pm 0.008$ | 0.027<br>$\pm 0.006$ | 0.027<br>$\pm 0.005$ | 0.039<br>$\pm 0.008$ | 0.029<br>$\pm 0.004$ | 0.035<br>$\pm 0.010$   | 0.032<br>$\pm 0.006$   | 0.027<br>$\pm 0.004$ | 0.037<br>$\pm 0.010$ | 0.031<br>$\pm 0.007$  | 0.028<br>$\pm 0.005$  | 0.028<br>$\pm 0.007$         | 0.026<br>$\pm 0.006$         |
|                 | BAcc     | 0.036<br>$\pm 0.008$ | 0.038<br>$\pm 0.009$ | 0.041<br>$\pm 0.010$ | 0.033<br>$\pm 0.010$ | 0.037<br>$\pm 0.008$ | 0.027<br>$\pm 0.006$ | 0.027<br>$\pm 0.005$ | 0.039<br>$\pm 0.008$ | 0.029<br>$\pm 0.004$ | 0.035<br>$\pm 0.011$   | 0.031<br>$\pm 0.006$   | 0.027<br>$\pm 0.004$ | 0.037<br>$\pm 0.010$ | 0.031<br>$\pm 0.007$  | 0.027<br>$\pm 0.005$  | 0.028<br>$\pm 0.007$         | 0.026<br>$\pm 0.006$         |
|                 | Acc.1    | 0.068<br>$\pm 0.013$ | 0.073<br>$\pm 0.015$ | 0.080<br>$\pm 0.018$ | 0.065<br>$\pm 0.016$ | 0.069<br>$\pm 0.012$ | 0.054<br>$\pm 0.011$ | 0.052<br>$\pm 0.007$ | 0.075<br>$\pm 0.012$ | 0.057<br>$\pm 0.005$ | 0.069<br>$\pm 0.015$   | 0.062<br>$\pm 0.010$   | 0.052<br>$\pm 0.007$ | 0.071<br>$\pm 0.014$ | 0.061<br>$\pm 0.011$  | 0.052<br>$\pm 0.006$  | 0.057<br>$\pm 0.012$         | 0.053<br>$\pm 0.010$         |
|                 | Acc.2    | 0.008<br>$\pm 0.008$ | 0.012<br>$\pm 0.007$ | 0.015<br>$\pm 0.009$ | 0.009<br>$\pm 0.007$ | 0.013<br>$\pm 0.008$ | 0.005<br>$\pm 0.007$ | 0.003<br>$\pm 0.006$ | 0.012<br>$\pm 0.006$ | 0.005<br>$\pm 0.004$ | 0.011<br>$\pm 0.009$   | 0.000<br>$\pm 0.004$   | 0.004<br>$\pm 0.004$ | 0.017<br>$\pm 0.009$ | 0.008<br>$\pm 0.007$  | 0.001<br>$\pm 0.002$  | 0.011<br>$\pm 0.008$         | 0.003<br>$\pm 0.007$         |
|                 | AUC      | 0.563<br>$\pm 0.028$ | 0.549<br>$\pm 0.022$ | 0.554<br>$\pm 0.023$ | 0.553<br>$\pm 0.028$ | 0.540<br>$\pm 0.019$ | 0.520<br>$\pm 0.018$ | 0.507<br>$\pm 0.012$ | 0.534<br>$\pm 0.015$ | 0.519<br>$\pm 0.008$ | 0.544<br>$\pm 0.024$   | 0.503<br>$\pm 0.013$   | 0.516<br>$\pm 0.011$ | 0.591<br>$\pm 0.030$ | 0.530<br>$\pm 0.014$  | 0.505<br>$\pm 0.012$  | 0.539<br>$\pm 0.022$         | 0.533<br>$\pm 0.030$         |
|                 | BAcc     | 0.033<br>$\pm 0.008$ | 0.036<br>$\pm 0.007$ | 0.040<br>$\pm 0.009$ | 0.034<br>$\pm 0.007$ | 0.037<br>$\pm 0.008$ | 0.030<br>$\pm 0.007$ | 0.028<br>$\pm 0.006$ | 0.037<br>$\pm 0.006$ | 0.030<br>$\pm 0.004$ | 0.036<br>$\pm 0.009$   | 0.025<br>$\pm 0.004$   | 0.029<br>$\pm 0.004$ | 0.042<br>$\pm 0.009$ | 0.033<br>$\pm 0.007$  | 0.026<br>$\pm 0.002$  | 0.036<br>$\pm 0.008$         | 0.028<br>$\pm 0.007$         |
|                 | Acc.1    | 0.033<br>$\pm 0.008$ | 0.036<br>$\pm 0.007$ | 0.040<br>$\pm 0.009$ | 0.034<br>$\pm 0.007$ | 0.037<br>$\pm 0.008$ | 0.031<br>$\pm 0.007$ | 0.028<br>$\pm 0.006$ | 0.037<br>$\pm 0.006$ | 0.030<br>$\pm 0.004$ | 0.036<br>$\pm 0.009$   | 0.025<br>$\pm 0.004$   | 0.029<br>$\pm 0.004$ | 0.042<br>$\pm 0.009$ | 0.033<br>$\pm 0.007$  | 0.025<br>$\pm 0.002$  | 0.036<br>$\pm 0.008$         | 0.028<br>$\pm 0.007$         |
|                 | Acc.2    | 0.068<br>$\pm 0.011$ | 0.069<br>$\pm 0.011$ | 0.076<br>$\pm 0.013$ | 0.067<br>$\pm 0.009$ | 0.070<br>$\pm 0.012$ | 0.058<br>$\pm 0.010$ | 0.055<br>$\pm 0.009$ | 0.071<br>$\pm 0.010$ | 0.058<br>$\pm 0.005$ | 0.070<br>$\pm 0.015$   | 0.049<br>$\pm 0.006$   | 0.056<br>$\pm 0.007$ | 0.080<br>$\pm 0.015$ | 0.064<br>$\pm 0.009$  | 0.049<br>$\pm 0.004$  | 0.071<br>$\pm 0.014$         | 0.056<br>$\pm 0.010$         |
| Subject32_async | $\kappa$ | 0.020<br>$\pm 0.020$ | 0.012<br>$\pm 0.008$ | 0.017<br>$\pm 0.011$ | 0.027<br>$\pm 0.030$ | 0.015<br>$\pm 0.010$ | 0.014<br>$\pm 0.014$ | 0.008<br>$\pm 0.013$ | 0.014<br>$\pm 0.007$ | 0.003<br>$\pm 0.004$ | 0.007<br>$\pm 0.007$   | 0.007<br>$\pm 0.008$   | 0.004<br>$\pm 0.006$ | 0.033<br>$\pm 0.043$ | 0.011<br>$\pm 0.011$  | 0.003<br>$\pm 0.005$  | 0.009<br>$\pm 0.010$         | 0.003<br>$\pm 0.006$         |
|                 | AUC      | 0.619<br>$\pm 0.056$ | 0.557<br>$\pm 0.023$ | 0.568<br>$\pm 0.030$ | 0.620<br>$\pm 0.069$ | 0.557<br>$\pm 0.025$ | 0.546<br>$\pm 0.032$ | 0.541<br>$\pm 0.034$ | 0.547<br>$\pm 0.019$ | 0.515<br>$\pm 0.010$ | 0.534<br>$\pm 0.022$   | 0.550<br>$\pm 0.024$   | 0.517<br>$\pm 0.017$ | 0.623<br>$\pm 0.079$ | 0.541<br>$\pm 0.025$  | 0.520<br>$\pm 0.018$  | 0.540<br>$\pm 0.023$         | 0.538<br>$\pm 0.028$         |
|                 | BAcc     | 0.045<br>$\pm 0.020$ | 0.036<br>$\pm 0.008$ | 0.042<br>$\pm 0.010$ | 0.051<br>$\pm 0.030$ | 0.039<br>$\pm 0.010$ | 0.039<br>$\pm 0.014$ | 0.033<br>$\pm 0.013$ | 0.039<br>$\pm 0.007$ | 0.028<br>$\pm 0.004$ | 0.032<br>$\pm 0.007$   | 0.032<br>$\pm 0.007$   | 0.029<br>$\pm 0.006$ | 0.057<br>$\pm 0.042$ | 0.036<br>$\pm 0.010$  | 0.028<br>$\pm 0.005$  | 0.034<br>$\pm 0.010$         | 0.028<br>$\pm 0.006$         |
|                 | Acc.1    | 0.045<br>$\pm 0.020$ | 0.036<br>$\pm 0.008$ | 0.042<br>$\pm 0.010$ | 0.051<br>$\pm 0.030$ | 0.039<br>$\pm 0.010$ | 0.039<br>$\pm 0.014$ | 0.032<br>$\pm 0.013$ | 0.039<br>$\pm 0.007$ | 0.028<br>$\pm 0.004$ | 0.032<br>$\pm 0.007$   | 0.032<br>$\pm 0.007$   | 0.029<br>$\pm 0.006$ | 0.057<br>$\pm 0.042$ | 0.036<br>$\pm 0.011$  | 0.028<br>$\pm 0.005$  | 0.034<br>$\pm 0.010$         | 0.028<br>$\pm 0.006$         |
|                 | Acc.2    | 0.088<br>$\pm 0.032$ | 0.072<br>$\pm 0.013$ | 0.080<br>$\pm 0.018$ | 0.095<br>$\pm 0.046$ | 0.076<br>$\pm 0.016$ | 0.075<br>$\pm 0.023$ | 0.066<br>$\pm 0.021$ | 0.074<br>$\pm 0.011$ | 0.056<br>$\pm 0.006$ | 0.063<br>$\pm 0.010$   | 0.065<br>$\pm 0.012$   | 0.057<br>$\pm 0.009$ | 0.106<br>$\pm 0.069$ | 0.070<br>$\pm 0.015$  | 0.055<br>$\pm 0.008$  | 0.064<br>$\pm 0.014$         | 0.053<br>$\pm 0.009$         |
| Subject33_async | $\kappa$ | 0.014<br>$\pm 0.009$ | 0.016<br>$\pm 0.008$ | 0.019<br>$\pm 0.010$ | 0.015<br>$\pm 0.010$ | 0.013<br>$\pm 0.010$ | 0.004<br>$\pm 0.006$ | 0.002<br>$\pm 0.005$ | 0.016<br>$\pm 0.007$ | 0.004<br>$\pm 0.004$ | 0.001<br>$\pm 0.007$   | 0.002<br>$\pm 0.006$   | 0.004<br>$\pm 0.004$ | 0.014<br>$\pm 0.014$ | 0.007<br>$\pm 0.008$  | 0.001<br>$\pm 0.004$  | 0.004<br>$\pm 0.008$         | 0.002<br>$\pm 0.005$         |
|                 | AUC      | 0.596<br>$\pm 0.036$ | 0.586<br>$\pm 0.032$ | 0.572<br>$\pm 0.027$ | 0.596<br>$\pm 0.037$ | 0.575<br>$\pm 0.034$ | 0.515<br>$\pm 0.019$ | 0.505<br>$\pm 0.013$ | 0.552<br>$\pm 0.021$ | 0.516<br>$\pm 0.008$ | 0.516<br>$\pm 0.020$   | 0.519<br>$\pm 0.021$   | 0.514<br>$\pm 0.013$ | 0.575<br>$\pm 0.045$ | 0.518<br>$\pm 0.016$  | 0.511<br>$\pm 0.015$  | 0.531<br>$\pm 0.023$         | 0.538<br>$\pm 0.027$         |

Continued on next page

| Subject         | Metric   | DeepConvnet                    | EEGNet                         | Conformer                      | CTNet                          | SSVEPDNN        | BIOT (f)        | BIOT (l)        | BENDR (f)                      | BENDR (l)       | CBraMod (f)     | CBraMod (l)     | EEGPT (f)       | EEGPT (l)                      | LaBraM (f)      | LaBraM (l)       | STEEGformer-s (f) | STEEGformer-s (l) |
|-----------------|----------|--------------------------------|--------------------------------|--------------------------------|--------------------------------|-----------------|-----------------|-----------------|--------------------------------|-----------------|-----------------|-----------------|-----------------|--------------------------------|-----------------|------------------|-------------------|-------------------|
|                 | BAcc     | 0.038<br>±0.009                | <b>0.041</b><br>± <b>0.008</b> | 0.043<br>± 0.010               | 0.040<br>±0.010                | 0.038<br>±0.010 | 0.029<br>±0.006 | 0.027<br>±0.005 | 0.041<br>±0.007                | 0.029<br>±0.004 | 0.026<br>±0.007 | 0.027<br>±0.005 | 0.029<br>±0.004 | 0.038<br>±0.013                | 0.032<br>±0.007 | 0.026<br>±0.004  | 0.029<br>±0.007   | 0.027<br>±0.005   |
|                 | Acc.1    | 0.038<br>±0.009                | 0.041<br>±0.008                | 0.043<br>± 0.010               | 0.040<br>±0.010                | 0.038<br>±0.010 | 0.028<br>±0.006 | 0.026<br>±0.005 | <b>0.041</b><br>± <b>0.007</b> | 0.029<br>±0.004 | 0.027<br>±0.007 | 0.026<br>±0.005 | 0.029<br>±0.004 | 0.039<br>±0.014                | 0.032<br>±0.007 | 0.026<br>±0.004  | 0.029<br>±0.008   | 0.027<br>±0.005   |
|                 | Acc.2    | 0.075<br>±0.014                | 0.078<br>±0.011                | <b>0.081</b><br>± <b>0.015</b> | 0.076<br>±0.014                | 0.074<br>±0.017 | 0.057<br>±0.010 | 0.053<br>±0.007 | 0.081<br>± 0.012               | 0.056<br>±0.006 | 0.055<br>±0.010 | 0.054<br>±0.007 | 0.057<br>±0.006 | 0.074<br>±0.021                | 0.061<br>±0.013 | 0.052<br>±0.004  | 0.060<br>±0.013   | 0.052<br>±0.008   |
|                 | $\kappa$ | 0.009<br>±0.005                | 0.009<br>±0.006                | 0.012<br>±0.007                | <b>0.032</b><br>± <b>0.032</b> | 0.012<br>±0.008 | 0.003<br>±0.007 | 0.000<br>±0.005 | 0.014<br>±0.006                | 0.004<br>±0.004 | 0.004<br>±0.008 | 0.003<br>±0.006 | 0.005<br>±0.006 | 0.045<br>± 0.040               | 0.009<br>±0.006 | -0.000<br>±0.004 | 0.006<br>±0.008   | 0.001<br>±0.006   |
| Subject34_async | AUC      | 0.557<br>±0.020                | 0.543<br>±0.019                | 0.545<br>±0.020                | <b>0.622</b><br>± <b>0.088</b> | 0.558<br>±0.024 | 0.515<br>±0.016 | 0.504<br>±0.014 | 0.537<br>±0.014                | 0.514<br>±0.007 | 0.534<br>±0.022 | 0.518<br>±0.014 | 0.524<br>±0.021 | 0.659<br>± 0.078               | 0.522<br>±0.015 | 0.504<br>±0.012  | 0.531<br>±0.020   | 0.518<br>±0.016   |
|                 | BAcc     | 0.034<br>±0.005                | 0.034<br>±0.006                | 0.036<br>±0.007                | <b>0.057</b><br>± <b>0.031</b> | 0.037<br>±0.008 | 0.028<br>±0.007 | 0.025<br>±0.005 | 0.039<br>±0.005                | 0.029<br>±0.004 | 0.029<br>±0.007 | 0.028<br>±0.005 | 0.030<br>±0.006 | 0.069<br>± 0.039               | 0.034<br>±0.006 | 0.025<br>±0.003  | 0.031<br>±0.008   | 0.026<br>±0.006   |
|                 | Acc.1    | 0.034<br>±0.005                | 0.034<br>±0.006                | 0.036<br>±0.007                | <b>0.057</b><br>± <b>0.031</b> | 0.037<br>±0.008 | 0.028<br>±0.007 | 0.025<br>±0.005 | 0.039<br>±0.006                | 0.029<br>±0.004 | 0.030<br>±0.007 | 0.028<br>±0.005 | 0.030<br>±0.006 | 0.070<br>± 0.039               | 0.033<br>±0.006 | 0.025<br>±0.004  | 0.030<br>±0.008   | 0.026<br>±0.006   |
|                 | Acc.2    | 0.063<br>±0.007                | 0.066<br>±0.009                | 0.069<br>±0.010                | <b>0.105</b><br>± <b>0.055</b> | 0.072<br>±0.012 | 0.055<br>±0.009 | 0.051<br>±0.006 | 0.075<br>±0.009                | 0.056<br>±0.006 | 0.061<br>±0.011 | 0.054<br>±0.008 | 0.059<br>±0.009 | 0.125<br>± 0.059               | 0.064<br>±0.010 | 0.050<br>±0.006  | 0.059<br>±0.010   | 0.051<br>±0.007   |
| Subject35_async | $\kappa$ | 0.013<br>±0.006                | 0.014<br>±0.008                | <b>0.018</b><br>± <b>0.011</b> | 0.017<br>±0.013                | 0.015<br>±0.009 | 0.005<br>±0.010 | 0.003<br>±0.006 | 0.016<br>±0.007                | 0.005<br>±0.004 | 0.009<br>±0.008 | 0.005<br>±0.005 | 0.005<br>±0.005 | 0.024<br>± 0.022               | 0.009<br>±0.007 | 0.002<br>±0.005  | 0.007<br>±0.008   | 0.002<br>±0.006   |
|                 | AUC      | 0.585<br>±0.031                | 0.581<br>±0.030                | 0.572<br>±0.026                | <b>0.598</b><br>± <b>0.043</b> | 0.566<br>±0.029 | 0.527<br>±0.025 | 0.509<br>±0.018 | 0.553<br>±0.022                | 0.520<br>±0.009 | 0.544<br>±0.021 | 0.530<br>±0.024 | 0.521<br>±0.016 | 0.617<br>± 0.057               | 0.532<br>±0.017 | 0.508<br>±0.012  | 0.544<br>±0.020   | 0.520<br>±0.020   |
|                 | BAcc     | 0.038<br>±0.006                | 0.039<br>±0.007                | <b>0.042</b><br>± <b>0.011</b> | 0.041<br>±0.012                | 0.040<br>±0.009 | 0.030<br>±0.009 | 0.028<br>±0.006 | 0.041<br>±0.007                | 0.030<br>±0.004 | 0.033<br>±0.008 | 0.030<br>±0.005 | 0.030<br>±0.005 | 0.049<br>± 0.021               | 0.034<br>±0.007 | 0.027<br>±0.005  | 0.032<br>±0.008   | 0.026<br>±0.006   |
|                 | Acc.1    | 0.038<br>±0.006                | 0.039<br>±0.007                | <b>0.042</b><br>± <b>0.011</b> | 0.041<br>±0.012                | 0.040<br>±0.009 | 0.030<br>±0.009 | 0.028<br>±0.006 | 0.041<br>±0.007                | 0.030<br>±0.004 | 0.034<br>±0.008 | 0.030<br>±0.005 | 0.030<br>±0.005 | 0.050<br>± 0.022               | 0.035<br>±0.007 | 0.027<br>±0.005  | 0.032<br>±0.008   | 0.026<br>±0.006   |
|                 | Acc.2    | 0.073<br>±0.011                | 0.078<br>±0.013                | <b>0.082</b><br>± <b>0.017</b> | 0.080<br>±0.021                | 0.076<br>±0.014 | 0.060<br>±0.015 | 0.055<br>±0.008 | 0.079<br>±0.013                | 0.058<br>±0.006 | 0.067<br>±0.012 | 0.060<br>±0.008 | 0.059<br>±0.008 | 0.092<br>± 0.034               | 0.068<br>±0.011 | 0.053<br>±0.007  | 0.063<br>±0.012   | 0.053<br>±0.007   |
| Subject3_async  | $\kappa$ | <b>0.052</b><br>± <b>0.106</b> | 0.016<br>±0.016                | 0.025<br>±0.042                | 0.068<br>± 0.130               | 0.011<br>±0.016 | 0.033<br>±0.071 | 0.016<br>±0.049 | 0.018<br>±0.016                | 0.005<br>±0.004 | 0.008<br>±0.007 | 0.010<br>±0.011 | 0.015<br>±0.035 | 0.045<br>±0.089                | 0.043<br>±0.093 | 0.002<br>±0.006  | 0.022<br>±0.045   | 0.004<br>±0.008   |
|                 | AUC      | 0.646<br>±0.109                | 0.565<br>±0.045                | 0.571<br>±0.059                | 0.661<br>± 0.118               | 0.549<br>±0.035 | 0.579<br>±0.078 | 0.538<br>±0.071 | 0.549<br>±0.034                | 0.526<br>±0.010 | 0.530<br>±0.021 | 0.561<br>±0.029 | 0.551<br>±0.059 | <b>0.659</b><br>± <b>0.095</b> | 0.585<br>±0.084 | 0.510<br>±0.017  | 0.579<br>±0.064   | 0.523<br>±0.023   |
|                 | BAcc     | <b>0.076</b><br>± <b>0.103</b> | 0.040<br>±0.016                | 0.049<br>±0.041                | 0.092<br>± 0.127               | 0.035<br>±0.016 | 0.057<br>±0.069 | 0.041<br>±0.047 | 0.043<br>±0.015                | 0.030<br>±0.004 | 0.033<br>±0.007 | 0.035<br>±0.011 | 0.035<br>±0.034 | 0.069<br>±0.087                | 0.067<br>±0.091 | 0.027<br>±0.006  | 0.046<br>±0.044   | 0.028<br>±0.008   |

Continued on next page

| Subject        | Metric   | DeepConvnet  | EEGNet      | Conformer    | CTNet       | SSVEPDNN    | BIOT (f)    | BIOT (l)    | BENDR (f)   | BENDR (l)   | CBraMod (f) | CBraMod (l) | EEGPT (f)   | EEGPT (l)    | LaBraM (f)   | LaBraM (l)  | STEEGformer-s (f) | STEEGformer-s (l) |
|----------------|----------|--------------|-------------|--------------|-------------|-------------|-------------|-------------|-------------|-------------|-------------|-------------|-------------|--------------|--------------|-------------|-------------------|-------------------|
| Subject4_sync  | Acc.1    | <b>0.076</b> | 0.040       | 0.049        | 0.092       | 0.035       | 0.057       | 0.041       | 0.043       | 0.030       | 0.033       | 0.034       | 0.039       | 0.069        | 0.066        | 0.027       | 0.046             | 0.028             |
|                |          | $\pm 0.103$  | $\pm 0.016$ | $\pm 0.041$  | $\pm 0.127$ | $\pm 0.016$ | $\pm 0.069$ | $\pm 0.047$ | $\pm 0.015$ | $\pm 0.004$ | $\pm 0.007$ | $\pm 0.011$ | $\pm 0.034$ | $\pm 0.086$  | $\pm 0.090$  | $\pm 0.006$ | $\pm 0.044$       | $\pm 0.008$       |
|                | Acc.2    | <b>0.128</b> | 0.076       | 0.091        | 0.155       | 0.070       | 0.101       | 0.076       | 0.081       | 0.060       | 0.063       | 0.067       | 0.075       | 0.121        | 0.114        | 0.053       | 0.090             | 0.055             |
|                |          | $\pm 0.132$  | $\pm 0.026$ | $\pm 0.060$  | $\pm 0.162$ | $\pm 0.024$ | $\pm 0.100$ | $\pm 0.073$ | $\pm 0.025$ | $\pm 0.007$ | $\pm 0.010$ | $\pm 0.018$ | $\pm 0.052$ | $\pm 0.118$  | $\pm 0.120$  | $\pm 0.008$ | $\pm 0.065$       | $\pm 0.011$       |
|                | $\kappa$ | 0.005        | 0.008       | <b>0.012</b> | 0.005       | 0.005       | 0.008       | 0.002       | 0.010       | 0.002       | 0.006       | 0.010       | 0.001       | 0.013        | 0.003        | 0.001       | 0.004             | 0.003             |
|                |          | $\pm 0.006$  | $\pm 0.008$ | $\pm 0.008$  | $\pm 0.007$ | $\pm 0.005$ | $\pm 0.009$ | $\pm 0.005$ | $\pm 0.006$ | $\pm 0.004$ | $\pm 0.007$ | $\pm 0.008$ | $\pm 0.004$ | $\pm 0.009$  | $\pm 0.007$  | $\pm 0.004$ | $\pm 0.007$       | $\pm 0.004$       |
| Subject4_async | AUC      | 0.540        | 0.544       | <b>0.547</b> | 0.527       | 0.525       | 0.525       | 0.508       | 0.526       | 0.509       | 0.531       | 0.545       | 0.511       | 0.575        | 0.516        | 0.506       | 0.526             | 0.519             |
|                |          | $\pm 0.021$  | $\pm 0.021$ | $\pm 0.019$  | $\pm 0.019$ | $\pm 0.017$ | $\pm 0.020$ | $\pm 0.014$ | $\pm 0.013$ | $\pm 0.006$ | $\pm 0.020$ | $\pm 0.027$ | $\pm 0.009$ | $\pm 0.031$  | $\pm 0.016$  | $\pm 0.011$ | $\pm 0.020$       | $\pm 0.016$       |
|                | BAcc     | 0.030        | 0.033       | <b>0.037</b> | 0.029       | 0.030       | 0.033       | 0.027       | 0.035       | 0.027       | 0.031       | 0.035       | 0.026       | 0.038        | 0.028        | 0.026       | 0.029             | 0.028             |
|                |          | $\pm 0.006$  | $\pm 0.007$ | $\pm 0.008$  | $\pm 0.007$ | $\pm 0.005$ | $\pm 0.009$ | $\pm 0.005$ | $\pm 0.006$ | $\pm 0.004$ | $\pm 0.007$ | $\pm 0.008$ | $\pm 0.004$ | $\pm 0.009$  | $\pm 0.007$  | $\pm 0.004$ | $\pm 0.007$       | $\pm 0.004$       |
|                | Acc.1    | 0.030        | 0.033       | <b>0.037</b> | 0.029       | 0.030       | 0.033       | 0.026       | 0.035       | 0.027       | 0.031       | 0.036       | 0.026       | 0.038        | 0.028        | 0.026       | 0.028             | 0.029             |
|                |          | $\pm 0.006$  | $\pm 0.007$ | $\pm 0.008$  | $\pm 0.007$ | $\pm 0.005$ | $\pm 0.009$ | $\pm 0.005$ | $\pm 0.006$ | $\pm 0.004$ | $\pm 0.007$ | $\pm 0.009$ | $\pm 0.004$ | $\pm 0.009$  | $\pm 0.007$  | $\pm 0.004$ | $\pm 0.007$       | $\pm 0.004$       |
| Subject5_sync  | Acc.2    | 0.060        | 0.065       | <b>0.070</b> | 0.057       | 0.060       | 0.063       | 0.053       | 0.067       | 0.052       | 0.061       | 0.068       | 0.053       | 0.074        | 0.055        | 0.053       | 0.056             | 0.056             |
|                |          | $\pm 0.008$  | $\pm 0.011$ | $\pm 0.012$  | $\pm 0.009$ | $\pm 0.008$ | $\pm 0.014$ | $\pm 0.008$ | $\pm 0.010$ | $\pm 0.005$ | $\pm 0.011$ | $\pm 0.014$ | $\pm 0.005$ | $\pm 0.015$  | $\pm 0.010$  | $\pm 0.006$ | $\pm 0.010$       | $\pm 0.008$       |
|                | $\kappa$ | 0.042        | 0.014       | 0.034        | 0.065       | 0.013       | 0.027       | 0.016       | 0.022       | 0.006       | 0.011       | 0.011       | 0.018       | 0.044        | <b>0.046</b> | 0.002       | 0.027             | 0.004             |
|                |          | $\pm 0.078$  | $\pm 0.011$ | $\pm 0.046$  | $\pm 0.116$ | $\pm 0.014$ | $\pm 0.052$ | $\pm 0.042$ | $\pm 0.018$ | $\pm 0.004$ | $\pm 0.009$ | $\pm 0.011$ | $\pm 0.038$ | $\pm 0.082$  | $\pm 0.090$  | $\pm 0.006$ | $\pm 0.035$       | $\pm 0.010$       |
|                | AUC      | 0.645        | 0.570       | 0.592        | 0.674       | 0.557       | 0.567       | 0.539       | 0.557       | 0.530       | 0.540       | 0.558       | 0.554       | <b>0.665</b> | 0.594        | 0.510       | 0.584             | 0.529             |
|                |          | $\pm 0.090$  | $\pm 0.037$ | $\pm 0.060$  | $\pm 0.106$ | $\pm 0.035$ | $\pm 0.068$ | $\pm 0.064$ | $\pm 0.034$ | $\pm 0.013$ | $\pm 0.023$ | $\pm 0.025$ | $\pm 0.058$ | $\pm 0.092$  | $\pm 0.084$  | $\pm 0.017$ | $\pm 0.054$       | $\pm 0.025$       |
| Subject5_async | BAcc     | 0.066        | 0.039       | 0.058        | 0.088       | 0.038       | 0.051       | 0.040       | 0.047       | 0.031       | 0.036       | 0.036       | 0.043       | 0.068        | <b>0.069</b> | 0.027       | 0.051             | 0.029             |
|                |          | $\pm 0.076$  | $\pm 0.011$ | $\pm 0.045$  | $\pm 0.113$ | $\pm 0.013$ | $\pm 0.051$ | $\pm 0.041$ | $\pm 0.018$ | $\pm 0.004$ | $\pm 0.009$ | $\pm 0.011$ | $\pm 0.037$ | $\pm 0.080$  | $\pm 0.088$  | $\pm 0.006$ | $\pm 0.034$       | $\pm 0.010$       |
|                | Acc.1    | 0.066        | 0.039       | 0.058        | 0.088       | 0.038       | 0.051       | 0.040       | 0.047       | 0.031       | 0.036       | 0.036       | 0.043       | 0.068        | <b>0.070</b> | 0.027       | 0.053             | 0.029             |
|                |          | $\pm 0.076$  | $\pm 0.011$ | $\pm 0.045$  | $\pm 0.113$ | $\pm 0.013$ | $\pm 0.050$ | $\pm 0.041$ | $\pm 0.018$ | $\pm 0.004$ | $\pm 0.009$ | $\pm 0.011$ | $\pm 0.037$ | $\pm 0.080$  | $\pm 0.088$  | $\pm 0.006$ | $\pm 0.034$       | $\pm 0.010$       |
|                | Acc.2    | 0.112        | 0.075       | 0.106        | 0.146       | 0.074       | 0.094       | 0.075       | 0.087       | 0.062       | 0.068       | 0.069       | 0.078       | <b>0.121</b> | 0.119        | 0.053       | 0.096             | 0.059             |
|                |          | $\pm 0.104$  | $\pm 0.015$ | $\pm 0.064$  | $\pm 0.144$ | $\pm 0.020$ | $\pm 0.076$ | $\pm 0.065$ | $\pm 0.026$ | $\pm 0.006$ | $\pm 0.013$ | $\pm 0.018$ | $\pm 0.053$ | $\pm 0.106$  | $\pm 0.115$  | $\pm 0.009$ | $\pm 0.052$       | $\pm 0.013$       |
| Subject6_async | $\kappa$ | 0.019        | 0.018       | 0.022        | 0.041       | 0.018       | 0.014       | 0.008       | 0.019       | 0.003       | 0.014       | 0.012       | 0.010       | <b>0.037</b> | 0.024        | 0.002       | 0.020             | 0.002             |
|                |          | $\pm 0.013$  | $\pm 0.011$ | $\pm 0.011$  | $\pm 0.050$ | $\pm 0.010$ | $\pm 0.016$ | $\pm 0.012$ | $\pm 0.009$ | $\pm 0.003$ | $\pm 0.010$ | $\pm 0.008$ | $\pm 0.014$ | $\pm 0.051$  | $\pm 0.020$  | $\pm 0.003$ | $\pm 0.017$       | $\pm 0.005$       |
|                | AUC      | 0.608        | 0.588       | 0.589        | 0.649       | 0.574       | 0.543       | 0.533       | 0.562       | 0.514       | 0.554       | 0.562       | 0.535       | <b>0.626</b> | 0.565        | 0.512       | 0.569             | 0.540             |
|                |          | $\pm 0.040$  | $\pm 0.033$ | $\pm 0.033$  | $\pm 0.083$ | $\pm 0.028$ | $\pm 0.040$ | $\pm 0.034$ | $\pm 0.023$ | $\pm 0.008$ | $\pm 0.025$ | $\pm 0.027$ | $\pm 0.036$ | $\pm 0.089$  | $\pm 0.042$  | $\pm 0.009$ | $\pm 0.042$       | $\pm 0.028$       |
|                | BAcc     | 0.043        | 0.042       | 0.046        | 0.065       | 0.043       | 0.038       | 0.033       | 0.043       | 0.028       | 0.039       | 0.037       | 0.034       | <b>0.061</b> | 0.048        | 0.027       | 0.045             | 0.027             |
|                |          | $\pm 0.012$  | $\pm 0.010$ | $\pm 0.011$  | $\pm 0.048$ | $\pm 0.010$ | $\pm 0.016$ | $\pm 0.012$ | $\pm 0.009$ | $\pm 0.003$ | $\pm 0.009$ | $\pm 0.007$ | $\pm 0.014$ | $\pm 0.049$  | $\pm 0.020$  | $\pm 0.003$ | $\pm 0.017$       | $\pm 0.005$       |
| Subject6_sync  | Acc.1    | 0.043        | 0.042       | 0.046        | 0.065       | 0.043       | 0.039       | 0.033       | 0.043       | 0.028       | 0.039       | 0.037       | 0.034       | <b>0.062</b> | 0.049        | 0.027       | 0.045             | 0.027             |
|                |          | $\pm 0.012$  | $\pm 0.010$ | $\pm 0.011$  | $\pm 0.048$ | $\pm 0.010$ | $\pm 0.016$ | $\pm 0.012$ | $\pm 0.009$ | $\pm 0.002$ | $\pm 0.009$ | $\pm 0.007$ | $\pm 0.014$ | $\pm 0.049$  | $\pm 0.020$  | $\pm 0.003$ | $\pm 0.017$       | $\pm 0.004$       |

Continued on next page

| Subject        | Metric   | DeepConvnet     | EEGNet          | Conformer       | CTNet                          | SSVEPDNN        | BIOT <sup>(f)</sup> | BIOT <sup>(l)</sup> | BENDR <sup>(f)</sup> | BENDR <sup>(l)</sup> | CBraMod <sup>(f)</sup> | CBraMod <sup>(l)</sup> | EEGPT <sup>(f)</sup> | EEGPT <sup>(l)</sup>           | LaBraM <sup>(f)</sup> | LaBraM <sup>(l)</sup> | STEEGformer-s <sup>(f)</sup> | STEEGformer-s <sup>(l)</sup> |
|----------------|----------|-----------------|-----------------|-----------------|--------------------------------|-----------------|---------------------|---------------------|----------------------|----------------------|------------------------|------------------------|----------------------|--------------------------------|-----------------------|-----------------------|------------------------------|------------------------------|
|                | Acc.2    | 0.083<br>±0.018 | 0.082<br>±0.018 | 0.089<br>±0.019 | 0.116<br>± 0.068               | 0.079<br>±0.015 | 0.074<br>±0.027     | 0.065<br>±0.020     | 0.083<br>±0.014      | 0.056<br>±0.004      | 0.072<br>±0.014        | 0.074<br>±0.011        | 0.067<br>±0.022      | <b>0.112</b><br>± <b>0.080</b> | 0.090<br>±0.031       | 0.054<br>±0.005       | 0.085<br>±0.028              | 0.054<br>±0.007              |
| Subject7_async | $\kappa$ | 0.014<br>±0.009 | 0.014<br>±0.008 | 0.017<br>±0.010 | <b>0.020</b><br>± <b>0.015</b> | 0.016<br>±0.009 | 0.003<br>±0.006     | 0.001<br>±0.006     | 0.014<br>±0.007      | 0.004<br>±0.003      | 0.009<br>±0.007        | 0.010<br>±0.007        | 0.005<br>±0.005      | 0.028<br>± 0.029               | 0.012<br>±0.009       | 0.003<br>±0.005       | 0.007<br>±0.007              | 0.002<br>±0.006              |
|                | AUC      | 0.590<br>±0.033 | 0.570<br>±0.028 | 0.580<br>±0.029 | <b>0.612</b><br>± <b>0.051</b> | 0.570<br>±0.023 | 0.515<br>±0.020     | 0.512<br>±0.021     | 0.551<br>±0.020      | 0.516<br>±0.010      | 0.537<br>±0.018        | 0.561<br>±0.018        | 0.519<br>±0.019      | 0.634<br>± 0.070               | 0.542<br>±0.023       | 0.521<br>±0.020       | 0.532<br>±0.019              | 0.543<br>±0.034              |
|                | BAcc     | 0.039<br>±0.009 | 0.038<br>±0.007 | 0.041<br>±0.010 | <b>0.044</b><br>± <b>0.014</b> | 0.041<br>±0.009 | 0.027<br>±0.006     | 0.026<br>±0.006     | 0.039<br>±0.007      | 0.029<br>±0.003      | 0.034<br>±0.007        | 0.035<br>±0.007        | 0.030<br>±0.005      | 0.053<br>± 0.029               | 0.037<br>±0.009       | 0.027<br>±0.005       | 0.031<br>±0.007              | 0.027<br>±0.006              |
|                | Acc.1    | 0.039<br>±0.009 | 0.038<br>±0.007 | 0.041<br>±0.010 | <b>0.044</b><br>± <b>0.014</b> | 0.041<br>±0.009 | 0.027<br>±0.006     | 0.026<br>±0.006     | 0.039<br>±0.007      | 0.029<br>±0.003      | 0.034<br>±0.007        | 0.036<br>±0.007        | 0.030<br>±0.005      | 0.052<br>± 0.028               | 0.036<br>±0.009       | 0.028<br>±0.005       | 0.031<br>±0.006              | 0.027<br>±0.006              |
|                | Acc.2    | 0.074<br>±0.015 | 0.074<br>±0.012 | 0.082<br>±0.017 | <b>0.085</b><br>± <b>0.025</b> | 0.078<br>±0.013 | 0.056<br>±0.010     | 0.052<br>±0.009     | 0.076<br>±0.011      | 0.056<br>±0.006      | 0.066<br>±0.010        | 0.069<br>±0.012        | 0.057<br>±0.008      | 0.098<br>± 0.047               | 0.071<br>±0.016       | 0.055<br>±0.008       | 0.063<br>±0.013              | 0.055<br>±0.010              |
|                |          |                 |                 |                 |                                |                 |                     |                     |                      |                      |                        |                        |                      |                                |                       |                       |                              |                              |
| Subject8_async | $\kappa$ | 0.006<br>±0.006 | 0.011<br>±0.009 | 0.009<br>±0.006 | <b>0.037</b><br>± <b>0.045</b> | 0.009<br>±0.007 | 0.004<br>±0.009     | 0.003<br>±0.008     | 0.012<br>±0.007      | 0.003<br>±0.004      | 0.003<br>±0.006        | 0.007<br>±0.008        | 0.005<br>±0.007      | 0.048<br>± 0.048               | 0.006<br>±0.007       | 0.000<br>±0.003       | 0.002<br>±0.007              | 0.002<br>±0.006              |
|                | AUC      | 0.548<br>±0.021 | 0.549<br>±0.024 | 0.538<br>±0.017 | <b>0.622</b><br>± <b>0.092</b> | 0.542<br>±0.019 | 0.516<br>±0.020     | 0.510<br>±0.016     | 0.534<br>±0.018      | 0.514<br>±0.007      | 0.523<br>±0.017        | 0.522<br>±0.018        | 0.524<br>±0.022      | 0.656<br>± 0.093               | 0.520<br>±0.014       | 0.508<br>±0.012       | 0.526<br>±0.015              | 0.518<br>±0.018              |
|                | BAcc     | 0.031<br>±0.006 | 0.036<br>±0.009 | 0.033<br>±0.006 | <b>0.061</b><br>± <b>0.044</b> | 0.034<br>±0.007 | 0.029<br>±0.008     | 0.028<br>±0.008     | 0.037<br>±0.007      | 0.028<br>±0.004      | 0.027<br>±0.006        | 0.032<br>±0.008        | 0.030<br>±0.007      | 0.071<br>± 0.047               | 0.031<br>±0.007       | 0.025<br>±0.003       | 0.027<br>±0.007              | 0.027<br>±0.006              |
|                | Acc.1    | 0.031<br>±0.006 | 0.036<br>±0.009 | 0.033<br>±0.006 | <b>0.061</b><br>± <b>0.044</b> | 0.034<br>±0.007 | 0.029<br>±0.008     | 0.028<br>±0.008     | 0.037<br>±0.007      | 0.029<br>±0.004      | 0.028<br>±0.006        | 0.032<br>±0.009        | 0.030<br>±0.007      | 0.071<br>± 0.047               | 0.031<br>±0.007       | 0.025<br>±0.003       | 0.027<br>±0.007              | 0.027<br>±0.006              |
|                | Acc.2    | 0.063<br>±0.009 | 0.069<br>±0.013 | 0.064<br>±0.009 | <b>0.111</b><br>± <b>0.071</b> | 0.066<br>±0.010 | 0.057<br>±0.014     | 0.055<br>±0.009     | 0.071<br>±0.012      | 0.055<br>±0.005      | 0.057<br>±0.010        | 0.061<br>±0.012        | 0.059<br>±0.011      | 0.126<br>± 0.073               | 0.060<br>±0.009       | 0.051<br>±0.004       | 0.057<br>±0.008              | 0.052<br>±0.009              |
|                |          |                 |                 |                 |                                |                 |                     |                     |                      |                      |                        |                        |                      |                                |                       |                       |                              |                              |
| Subject9_async | $\kappa$ | 0.014<br>±0.010 | 0.013<br>±0.009 | 0.018<br>±0.010 | <b>0.022</b><br>± <b>0.015</b> | 0.017<br>±0.010 | 0.006<br>±0.010     | -0.001<br>±0.006    | 0.017<br>±0.009      | 0.003<br>±0.004      | 0.004<br>±0.006        | 0.001<br>±0.006        | 0.003<br>±0.005      | 0.031<br>± 0.035               | 0.002<br>±0.005       | 0.001<br>±0.003       | 0.014<br>±0.010              | 0.001<br>±0.007              |
|                | AUC      | 0.579<br>±0.035 | 0.571<br>±0.030 | 0.575<br>±0.032 | <b>0.607</b><br>± <b>0.045</b> | 0.573<br>±0.029 | 0.525<br>±0.023     | 0.505<br>±0.014     | 0.554<br>±0.022      | 0.522<br>±0.010      | 0.519<br>±0.015        | 0.504<br>±0.019        | 0.515<br>±0.014      | 0.625<br>± 0.077               | 0.517<br>±0.012       | 0.504<br>±0.007       | 0.546<br>±0.027              | 0.517<br>±0.023              |
|                | BAcc     | 0.038<br>±0.010 | 0.038<br>±0.008 | 0.043<br>±0.010 | <b>0.046</b><br>± <b>0.014</b> | 0.042<br>±0.010 | 0.031<br>±0.010     | 0.024<br>±0.005     | 0.042<br>±0.009      | 0.028<br>±0.004      | 0.029<br>±0.005        | 0.026<br>±0.005        | 0.028<br>±0.005      | 0.055<br>± 0.034               | 0.027<br>±0.005       | 0.026<br>±0.003       | 0.039<br>±0.010              | 0.026<br>±0.006              |
|                | Acc.1    | 0.038<br>±0.010 | 0.038<br>±0.008 | 0.043<br>±0.010 | <b>0.046</b><br>± <b>0.014</b> | 0.042<br>±0.010 | 0.031<br>±0.010     | 0.024<br>±0.005     | 0.042<br>±0.009      | 0.028<br>±0.004      | 0.029<br>±0.005        | 0.027<br>±0.005        | 0.028<br>±0.005      | 0.055<br>± 0.034               | 0.029<br>±0.005       | 0.029<br>±0.004       | 0.039<br>±0.010              | 0.026<br>±0.006              |
|                | Acc.2    | 0.075<br>±0.017 | 0.076<br>±0.015 | 0.083<br>±0.016 | <b>0.087</b><br>± <b>0.022</b> | 0.079<br>±0.015 | 0.060<br>±0.014     | 0.051<br>±0.009     | 0.081<br>±0.014      | 0.057<br>±0.006      | 0.058<br>±0.008        | 0.052<br>±0.007        | 0.055<br>±0.008      | 0.100<br>± 0.052               | 0.058<br>±0.007       | 0.054<br>±0.004       | 0.074<br>±0.014              | 0.051<br>±0.009              |
|                |          |                 |                 |                 |                                |                 |                     |                     |                      |                      |                        |                        |                      |                                |                       |                       |                              |                              |

7701  
7702  
7703  
7704  
7705  
7706  
7707  
7708  
7709  
7710  
7711  
7712  
7713  
7714  
7715  
7716  
7717  
7718  
7719  
7720  
7721  
7722  
7723  
7724  
7725  
7726  
7727  
7728  
7729  
7730  
7731  
7732  
7733

## F.3 LEAVE-ONE-OUT RESULTS

## F.3.1 SYNCHRONOUS DECODING RESULTS

## Leave-One-Out Zero-Shot Evaluation

Table 63: Average Leave-One-Out Zero-Shot Performance Across All Subjects.

| Model (Training strategy) | $\kappa$     | AUC          | BAcc         | Acc.1        | Acc.2        |
|---------------------------|--------------|--------------|--------------|--------------|--------------|
|                           | 0.124        | 0.750        | 0.146        | 0.145        | 0.235        |
| <b>DeepConvnet</b>        | $\pm 0.099$  | $\pm 0.107$  | $\pm 0.096$  | $\pm 0.097$  | $\pm 0.138$  |
|                           | 0.160        | 0.767        | 0.181        | 0.179        | 0.280        |
| <b>EEGNet</b>             | $\pm 0.122$  | $\pm 0.134$  | $\pm 0.119$  | $\pm 0.117$  | $\pm 0.166$  |
|                           | 0.107        | 0.730        | 0.130        | 0.130        | 0.213        |
| <b>Conformer</b>          | $\pm 0.098$  | $\pm 0.115$  | $\pm 0.096$  | $\pm 0.099$  | $\pm 0.133$  |
|                           | <b>0.188</b> | 0.806        | <b>0.208</b> | <b>0.215</b> | <b>0.338</b> |
| <b>CTNet</b>              | $\pm 0.153$  | $\pm 0.136$  | $\pm 0.149$  | $\pm 0.159$  | $\pm 0.215$  |
|                           | 0.111        | 0.724        | 0.134        | 0.133        | 0.218        |
| <b>SSVEPDNN</b>           | $\pm 0.088$  | $\pm 0.111$  | $\pm 0.086$  | $\pm 0.086$  | $\pm 0.123$  |
|                           | 0.171        | 0.707        | 0.191        | 0.208        | 0.313        |
| <b>BIOT (f)</b>           | $\pm 0.140$  | $\pm 0.111$  | $\pm 0.136$  | $\pm 0.147$  | $\pm 0.194$  |
|                           | 0.156        | <b>0.776</b> | 0.177        | 0.180        | 0.305        |
| <b>BIOT (l)</b>           | $\pm 0.125$  | $\pm 0.130$  | $\pm 0.122$  | $\pm 0.127$  | $\pm 0.194$  |
|                           | 0.163        | 0.740        | 0.184        | 0.187        | 0.284        |
| <b>BENDR (f)</b>          | $\pm 0.135$  | $\pm 0.118$  | $\pm 0.132$  | $\pm 0.137$  | $\pm 0.178$  |
|                           | 0.015        | 0.573        | 0.039        | 0.037        | 0.072        |
| <b>BENDR (l)</b>          | $\pm 0.021$  | $\pm 0.073$  | $\pm 0.020$  | $\pm 0.023$  | $\pm 0.037$  |
|                           | 0.040        | 0.604        | 0.064        | 0.070        | 0.126        |
| <b>CBraMod (f)</b>        | $\pm 0.019$  | $\pm 0.037$  | $\pm 0.019$  | $\pm 0.025$  | $\pm 0.038$  |
|                           | 0.031        | 0.655        | 0.055        | 0.070        | 0.124        |
| <b>CBraMod (l)</b>        | $\pm 0.019$  | $\pm 0.080$  | $\pm 0.019$  | $\pm 0.027$  | $\pm 0.046$  |
|                           | 0.077        | 0.659        | 0.100        | 0.116        | 0.176        |
| <b>EEGPT (f)</b>          | $\pm 0.071$  | $\pm 0.082$  | $\pm 0.070$  | $\pm 0.083$  | $\pm 0.102$  |
|                           | 0.126        | 0.767        | 0.147        | 0.162        | 0.258        |
| <b>EEGPT (l)</b>          | $\pm 0.095$  | $\pm 0.108$  | $\pm 0.092$  | $\pm 0.110$  | $\pm 0.147$  |
|                           | 0.194        | 0.741        | 0.214        | 0.238        | 0.348        |
| <b>LaBraM (f)</b>         | $\pm 0.146$  | $\pm 0.104$  | $\pm 0.142$  | $\pm 0.155$  | $\pm 0.182$  |
|                           | 0.008        | 0.530        | 0.033        | 0.034        | 0.063        |
| <b>LaBraM (l)</b>         | $\pm 0.014$  | $\pm 0.027$  | $\pm 0.014$  | $\pm 0.018$  | $\pm 0.028$  |
|                           | 0.140        | 0.685        | 0.162        | 0.179        | 0.269        |
| <b>STEEGformer-s (f)</b>  | $\pm 0.104$  | $\pm 0.094$  | $\pm 0.101$  | $\pm 0.118$  | $\pm 0.153$  |
|                           | 0.012        | 0.602        | 0.036        | 0.031        | 0.061        |
| <b>STEEGformer-s (l)</b>  | $\pm 0.014$  | $\pm 0.045$  | $\pm 0.014$  | $\pm 0.017$  | $\pm 0.029$  |

Table 64: Per-Subject Leave-One-Out Zero-Shot Performance.

| Subject   | Metric   | DeepConvnet                 | EEGNet               | Conformer            | CTNet                       | SSVEPDNN             | BIOT (f)                    | BIOT (l)                    | BENDR (f)            | BENDR (l)             | CBraMod (f)          | CBraMod (l)          | EEGPT (f)            | EEGPT (l)                   | LaBraM (f)           | LaBraM (l)            | STEEGformers (f)            | STEEGformers (l)     |
|-----------|----------|-----------------------------|----------------------|----------------------|-----------------------------|----------------------|-----------------------------|-----------------------------|----------------------|-----------------------|----------------------|----------------------|----------------------|-----------------------------|----------------------|-----------------------|-----------------------------|----------------------|
| Subject1  | $\kappa$ | 0.082<br>$\pm 0.061$        | 0.082<br>$\pm 0.033$ | 0.067<br>$\pm 0.056$ | 0.128<br>$\pm 0.041$        | 0.082<br>$\pm 0.028$ | 0.082<br>$\pm 0.056$        | 0.092<br>$\pm 0.067$        | 0.096<br>$\pm 0.043$ | -0.006<br>$\pm 0.012$ | 0.015<br>$\pm 0.029$ | 0.031<br>$\pm 0.033$ | 0.015<br>$\pm 0.029$ | 0.036<br>$\pm 0.014$        | 0.169<br>$\pm 0.047$ | -0.005<br>$\pm 0.011$ | <b>0.149</b><br>$\pm 0.071$ | 0.010<br>$\pm 0.029$ |
|           | AUC      | 0.710<br>$\pm 0.067$        | 0.706<br>$\pm 0.034$ | 0.689<br>$\pm 0.070$ | 0.791<br>$\pm 0.043$        | 0.673<br>$\pm 0.039$ | 0.654<br>$\pm 0.023$        | <b>0.746</b><br>$\pm 0.041$ | 0.661<br>$\pm 0.035$ | 0.526<br>$\pm 0.039$  | 0.564<br>$\pm 0.078$ | 0.626<br>$\pm 0.054$ | 0.610<br>$\pm 0.063$ | 0.642<br>$\pm 0.027$        | 0.722<br>$\pm 0.056$ | 0.534<br>$\pm 0.037$  | 0.706<br>$\pm 0.069$        | 0.554<br>$\pm 0.043$ |
|           | BAcc     | 0.105<br>$\pm 0.060$        | 0.105<br>$\pm 0.033$ | 0.090<br>$\pm 0.055$ | 0.150<br>$\pm 0.040$        | 0.105<br>$\pm 0.027$ | 0.105<br>$\pm 0.054$        | 0.115<br>$\pm 0.065$        | 0.119<br>$\pm 0.042$ | 0.019<br>$\pm 0.012$  | 0.040<br>$\pm 0.029$ | 0.055<br>$\pm 0.033$ | 0.040<br>$\pm 0.029$ | 0.060<br>$\pm 0.014$        | 0.190<br>$\pm 0.045$ | 0.020<br>$\pm 0.011$  | <b>0.170</b><br>$\pm 0.069$ | 0.035<br>$\pm 0.029$ |
|           | Acc.1    | 0.105<br>$\pm 0.060$        | 0.105<br>$\pm 0.033$ | 0.090<br>$\pm 0.055$ | <b>0.150</b><br>$\pm 0.040$ | 0.105<br>$\pm 0.027$ | 0.113<br>$\pm 0.061$        | 0.081<br>$\pm 0.061$        | 0.104<br>$\pm 0.036$ | 0.012<br>$\pm 0.007$  | 0.044<br>$\pm 0.056$ | 0.044<br>$\pm 0.039$ | 0.044<br>$\pm 0.056$ | 0.047<br>$\pm 0.027$        | 0.175<br>$\pm 0.026$ | 0.022<br>$\pm 0.024$  | 0.144<br>$\pm 0.055$        | 0.041<br>$\pm 0.032$ |
|           | Acc.2    | 0.180<br>$\pm 0.104$        | 0.180<br>$\pm 0.021$ | 0.170<br>$\pm 0.104$ | 0.230<br>$\pm 0.045$        | 0.175<br>$\pm 0.040$ | 0.203<br>$\pm 0.062$        | 0.206<br>$\pm 0.089$        | 0.146<br>$\pm 0.033$ | 0.027<br>$\pm 0.016$  | 0.094<br>$\pm 0.080$ | 0.084<br>$\pm 0.057$ | 0.094<br>$\pm 0.055$ | 0.081<br>$\pm 0.034$        | 0.263<br>$\pm 0.102$ | 0.037<br>$\pm 0.041$  | <b>0.237</b><br>$\pm 0.120$ | 0.050<br>$\pm 0.026$ |
|           |          |                             |                      |                      |                             |                      |                             |                             |                      |                       |                      |                      |                      |                             |                      |                       |                             |                      |
| Subject10 | $\kappa$ | 0.036<br>$\pm 0.023$        | 0.031<br>$\pm 0.033$ | 0.015<br>$\pm 0.014$ | 0.010<br>$\pm 0.029$        | 0.036<br>$\pm 0.014$ | 0.021<br>$\pm 0.011$        | 0.031<br>$\pm 0.042$        | 0.051<br>$\pm 0.057$ | 0.000<br>$\pm 0.018$  | 0.041<br>$\pm 0.050$ | 0.046<br>$\pm 0.028$ | 0.036<br>$\pm 0.039$ | 0.077<br>$\pm 0.033$        | 0.015<br>$\pm 0.023$ | -0.005<br>$\pm 0.021$ | <b>0.056</b><br>$\pm 0.021$ | 0.031<br>$\pm 0.011$ |
|           | AUC      | 0.635<br>$\pm 0.020$        | 0.597<br>$\pm 0.028$ | 0.596<br>$\pm 0.037$ | 0.625<br>$\pm 0.050$        | 0.583<br>$\pm 0.042$ | 0.545<br>$\pm 0.027$        | 0.574<br>$\pm 0.042$        | 0.556<br>$\pm 0.034$ | 0.561<br>$\pm 0.039$  | 0.582<br>$\pm 0.034$ | 0.680<br>$\pm 0.019$ | 0.544<br>$\pm 0.026$ | <b>0.668</b><br>$\pm 0.043$ | 0.564<br>$\pm 0.021$ | 0.556<br>$\pm 0.025$  | 0.589<br>$\pm 0.016$        | 0.607<br>$\pm 0.031$ |
|           | BAcc     | 0.060<br>$\pm 0.022$        | 0.055<br>$\pm 0.033$ | 0.040<br>$\pm 0.014$ | 0.035<br>$\pm 0.029$        | 0.060<br>$\pm 0.014$ | 0.045<br>$\pm 0.011$        | 0.055<br>$\pm 0.041$        | 0.075<br>$\pm 0.056$ | 0.025<br>$\pm 0.018$  | 0.065<br>$\pm 0.049$ | 0.070<br>$\pm 0.027$ | 0.060<br>$\pm 0.038$ | 0.100<br>$\pm 0.032$        | 0.040<br>$\pm 0.022$ | 0.020<br>$\pm 0.021$  | <b>0.080</b><br>$\pm 0.021$ | 0.055<br>$\pm 0.011$ |
|           | Acc.1    | 0.060<br>$\pm 0.022$        | 0.055<br>$\pm 0.033$ | 0.040<br>$\pm 0.014$ | 0.035<br>$\pm 0.029$        | 0.060<br>$\pm 0.014$ | 0.056<br>$\pm 0.024$        | 0.053<br>$\pm 0.048$        | 0.075<br>$\pm 0.069$ | 0.034<br>$\pm 0.034$  | 0.087<br>$\pm 0.075$ | 0.072<br>$\pm 0.039$ | 0.075<br>$\pm 0.055$ | <b>0.089</b><br>$\pm 0.028$ | 0.053<br>$\pm 0.053$ | 0.016<br>$\pm 0.011$  | 0.125<br>$\pm 0.046$        | 0.034<br>$\pm 0.007$ |
|           | Acc.2    | 0.090<br>$\pm 0.034$        | 0.100<br>$\pm 0.043$ | 0.090<br>$\pm 0.052$ | 0.100<br>$\pm 0.018$        | 0.110<br>$\pm 0.022$ | 0.106<br>$\pm 0.074$        | 0.081<br>$\pm 0.050$        | 0.109<br>$\pm 0.057$ | 0.062<br>$\pm 0.044$  | 0.181<br>$\pm 0.078$ | 0.150<br>$\pm 0.045$ | 0.087<br>$\pm 0.055$ | 0.116<br>$\pm 0.022$        | 0.166<br>$\pm 0.092$ | 0.059<br>$\pm 0.034$  | <b>0.169</b><br>$\pm 0.061$ | 0.047<br>$\pm 0.010$ |
|           |          |                             |                      |                      |                             |                      |                             |                             |                      |                       |                      |                      |                      |                             |                      |                       |                             |                      |
| Subject11 | $\kappa$ | 0.056<br>$\pm 0.064$        | 0.067<br>$\pm 0.039$ | 0.030<br>$\pm 0.030$ | 0.087<br>$\pm 0.068$        | 0.021<br>$\pm 0.046$ | <b>0.087</b><br>$\pm 0.023$ | 0.097<br>$\pm 0.033$        | 0.057<br>$\pm 0.028$ | 0.026<br>$\pm 0.039$  | 0.038<br>$\pm 0.047$ | 0.021<br>$\pm 0.038$ | 0.010<br>$\pm 0.029$ | 0.046<br>$\pm 0.028$        | 0.045<br>$\pm 0.043$ | -0.000<br>$\pm 0.026$ | 0.082<br>$\pm 0.049$        | 0.019<br>$\pm 0.041$ |
|           | AUC      | <b>0.721</b><br>$\pm 0.055$ | 0.713<br>$\pm 0.033$ | 0.649<br>$\pm 0.030$ | 0.762<br>$\pm 0.030$        | 0.660<br>$\pm 0.025$ | 0.605<br>$\pm 0.055$        | 0.704<br>$\pm 0.042$        | 0.612<br>$\pm 0.038$ | 0.534<br>$\pm 0.050$  | 0.550<br>$\pm 0.038$ | 0.619<br>$\pm 0.074$ | 0.551<br>$\pm 0.045$ | 0.670<br>$\pm 0.049$        | 0.642<br>$\pm 0.031$ | 0.539<br>$\pm 0.040$  | 0.613<br>$\pm 0.031$        | 0.534<br>$\pm 0.053$ |
|           | BAcc     | 0.080<br>$\pm 0.062$        | 0.090<br>$\pm 0.038$ | 0.054<br>$\pm 0.029$ | 0.109<br>$\pm 0.067$        | 0.045<br>$\pm 0.045$ | <b>0.110</b><br>$\pm 0.022$ | 0.120<br>$\pm 0.033$        | 0.081<br>$\pm 0.027$ | 0.050<br>$\pm 0.038$  | 0.062<br>$\pm 0.046$ | 0.045<br>$\pm 0.037$ | 0.035<br>$\pm 0.029$ | 0.070<br>$\pm 0.027$        | 0.069<br>$\pm 0.042$ | 0.025<br>$\pm 0.025$  | 0.105<br>$\pm 0.048$        | 0.044<br>$\pm 0.040$ |
|           | Acc.1    | 0.080<br>$\pm 0.062$        | 0.090<br>$\pm 0.038$ | 0.059<br>$\pm 0.031$ | 0.174<br>$\pm 0.087$        | 0.045<br>$\pm 0.045$ | 0.116<br>$\pm 0.045$        | <b>0.141</b><br>$\pm 0.062$ | 0.092<br>$\pm 0.041$ | 0.043<br>$\pm 0.038$  | 0.039<br>$\pm 0.029$ | 0.075<br>$\pm 0.080$ | 0.041<br>$\pm 0.032$ | 0.062<br>$\pm 0.038$        | 0.098<br>$\pm 0.052$ | 0.016<br>$\pm 0.016$  | 0.122<br>$\pm 0.062$        | 0.033<br>$\pm 0.037$ |
|           | Acc.2    | 0.160<br>$\pm 0.065$        | 0.175<br>$\pm 0.059$ | 0.136<br>$\pm 0.078$ | 0.271<br>$\pm 0.130$        | 0.115<br>$\pm 0.014$ | 0.159<br>$\pm 0.040$        | 0.178<br>$\pm 0.076$        | 0.151<br>$\pm 0.062$ | 0.059<br>$\pm 0.052$  | 0.096<br>$\pm 0.065$ | 0.116<br>$\pm 0.103$ | 0.053<br>$\pm 0.038$ | 0.116<br>$\pm 0.021$        | 0.160<br>$\pm 0.042$ | 0.031<br>$\pm 0.016$  | <b>0.197</b><br>$\pm 0.051$ | 0.037<br>$\pm 0.034$ |
|           |          |                             |                      |                      |                             |                      |                             |                             |                      |                       |                      |                      |                      |                             |                      |                       |                             |                      |

Continued on next page

| Subject   | Metric   | DeepConvnet                        | EEGNet                             | Conformer            | CTNet                              | SSVEPDNN             | BIOT (f)                           | BIOT (l)             | BENDR (f)             | BENDR (l)             | CBraMod (f)                        | CBraMod (l)                        | EEGPT (f)            | EEGPT (l)                          | LaBraM (f)                         | LaBraM (l)            | STEEGformer-s (f)                  | STEEGformer-s (l)     |
|-----------|----------|------------------------------------|------------------------------------|----------------------|------------------------------------|----------------------|------------------------------------|----------------------|-----------------------|-----------------------|------------------------------------|------------------------------------|----------------------|------------------------------------|------------------------------------|-----------------------|------------------------------------|-----------------------|
| Subject12 | $\kappa$ | <b>0.026</b><br>$\pm$ <b>0.031</b> | -0.021<br>$\pm$ 0.011              | 0.021<br>$\pm$ 0.033 | -0.015<br>$\pm$ 0.014              | 0.000<br>$\pm$ 0.000 | 0.010<br>$\pm$ 0.014               | 0.015<br>$\pm$ 0.029 | -0.013<br>$\pm$ 0.021 | 0.000<br>$\pm$ 0.018  | 0.046<br>$\pm$ 0.053               | 0.000<br>$\pm$ 0.026               | 0.010<br>$\pm$ 0.039 | 0.005<br>$\pm$ 0.028               | 0.015<br>$\pm$ 0.023               | -0.000<br>$\pm$ 0.018 | -0.000<br>$\pm$ 0.018              | 0.005<br>$\pm$ 0.021  |
|           | AUC      | 0.571<br>$\pm$ 0.043               | 0.526<br>$\pm$ 0.057               | 0.547<br>$\pm$ 0.068 | 0.576<br>$\pm$ 0.068               | 0.535<br>$\pm$ 0.021 | 0.544<br>$\pm$ 0.039               | 0.530<br>$\pm$ 0.027 | 0.511<br>$\pm$ 0.050  | 0.508<br>$\pm$ 0.051  | 0.574<br>$\pm$ 0.072               | 0.660<br>$\pm$ 0.044               | 0.564<br>$\pm$ 0.054 | <b>0.588</b><br>$\pm$ <b>0.045</b> | 0.582<br>$\pm$ 0.030               | 0.499<br>$\pm$ 0.036  | 0.514<br>$\pm$ 0.025               | 0.501<br>$\pm$ 0.037  |
|           | BAcc     | <b>0.050</b><br>$\pm$ <b>0.031</b> | 0.005<br>$\pm$ 0.011               | 0.045<br>$\pm$ 0.033 | 0.010<br>$\pm$ 0.014               | 0.025<br>$\pm$ 0.000 | 0.035<br>$\pm$ 0.014               | 0.040<br>$\pm$ 0.029 | 0.013<br>$\pm$ 0.021  | 0.025<br>$\pm$ 0.018  | 0.070<br>$\pm$ 0.051               | 0.025<br>$\pm$ 0.025               | 0.035<br>$\pm$ 0.038 | 0.030<br>$\pm$ 0.027               | 0.040<br>$\pm$ 0.022               | 0.025<br>$\pm$ 0.018  | 0.025<br>$\pm$ 0.018               | 0.030<br>$\pm$ 0.021  |
|           | Acc.1    | 0.031<br>$\pm$ 0.019               | 0.003<br>$\pm$ 0.007               | 0.028<br>$\pm$ 0.020 | 0.006<br>$\pm$ 0.009               | 0.025<br>$\pm$ 0.000 | 0.031<br>$\pm$ 0.027               | 0.025<br>$\pm$ 0.018 | 0.008<br>$\pm$ 0.013  | 0.016<br>$\pm$ 0.011  | 0.062<br>$\pm$ 0.057               | <b>0.044</b><br>$\pm$ <b>0.056</b> | 0.022<br>$\pm$ 0.024 | 0.037<br>$\pm$ 0.039               | <b>0.044</b><br>$\pm$ <b>0.034</b> | 0.016<br>$\pm$ 0.011  | 0.016<br>$\pm$ 0.011               | 0.019<br>$\pm$ 0.013  |
|           | Acc.2    | 0.078<br>$\pm$ 0.027               | 0.037<br>$\pm$ 0.018               | 0.069<br>$\pm$ 0.034 | 0.022<br>$\pm$ 0.009               | 0.070<br>$\pm$ 0.048 | 0.059<br>$\pm$ 0.032               | 0.041<br>$\pm$ 0.026 | 0.036<br>$\pm$ 0.043  | 0.037<br>$\pm$ 0.024  | <b>0.094</b><br>$\pm$ <b>0.049</b> | 0.100<br>$\pm$ 0.070               | 0.047<br>$\pm$ 0.040 | 0.056<br>$\pm$ 0.032               | 0.091<br>$\pm$ 0.061               | 0.034<br>$\pm$ 0.020  | 0.037<br>$\pm$ 0.018               | 0.041<br>$\pm$ 0.018  |
| Subject13 | $\kappa$ | 0.179<br>$\pm$ 0.098               | <b>0.200</b><br>$\pm$ <b>0.069</b> | 0.128<br>$\pm$ 0.036 | 0.226<br>$\pm$ 0.118               | 0.138<br>$\pm$ 0.072 | 0.138<br>$\pm$ 0.047               | 0.077<br>$\pm$ 0.026 | 0.191<br>$\pm$ 0.073  | 0.018<br>$\pm$ 0.032  | 0.046<br>$\pm$ 0.033               | 0.000<br>$\pm$ 0.018               | 0.054<br>$\pm$ 0.035 | 0.164<br>$\pm$ 0.034               | 0.144<br>$\pm$ 0.063               | -0.010<br>$\pm$ 0.023 | 0.097<br>$\pm$ 0.033               | -0.003<br>$\pm$ 0.021 |
|           | AUC      | 0.807<br>$\pm$ 0.075               | 0.825<br>$\pm$ 0.034               | 0.758<br>$\pm$ 0.052 | 0.866<br>$\pm$ 0.034               | 0.767<br>$\pm$ 0.049 | 0.716<br>$\pm$ 0.033               | 0.793<br>$\pm$ 0.026 | 0.782<br>$\pm$ 0.022  | 0.588<br>$\pm$ 0.017  | 0.607<br>$\pm$ 0.021               | 0.464<br>$\pm$ 0.051               | 0.711<br>$\pm$ 0.026 | <b>0.846</b><br>$\pm$ <b>0.019</b> | 0.738<br>$\pm$ 0.038               | 0.482<br>$\pm$ 0.043  | 0.697<br>$\pm$ 0.056               | 0.602<br>$\pm$ 0.042  |
|           | BAcc     | 0.200<br>$\pm$ 0.095               | <b>0.220</b><br>$\pm$ <b>0.067</b> | 0.150<br>$\pm$ 0.035 | 0.245<br>$\pm$ 0.115               | 0.160<br>$\pm$ 0.070 | 0.160<br>$\pm$ 0.045               | 0.100<br>$\pm$ 0.025 | 0.211<br>$\pm$ 0.071  | 0.043<br>$\pm$ 0.031  | 0.070<br>$\pm$ 0.033               | 0.025<br>$\pm$ 0.018               | 0.078<br>$\pm$ 0.034 | 0.185<br>$\pm$ 0.034               | 0.166<br>$\pm$ 0.061               | 0.015<br>$\pm$ 0.022  | 0.120<br>$\pm$ 0.033               | 0.022<br>$\pm$ 0.021  |
|           | Acc.1    | 0.200<br>$\pm$ 0.095               | <b>0.220</b><br>$\pm$ <b>0.067</b> | 0.150<br>$\pm$ 0.035 | 0.245<br>$\pm$ 0.115               | 0.160<br>$\pm$ 0.070 | 0.166<br>$\pm$ 0.055               | 0.119<br>$\pm$ 0.042 | 0.205<br>$\pm$ 0.062  | 0.047<br>$\pm$ 0.041  | 0.109<br>$\pm$ 0.044               | 0.016<br>$\pm$ 0.011               | 0.090<br>$\pm$ 0.055 | 0.209<br>$\pm$ 0.048               | 0.203<br>$\pm$ 0.081               | 0.028<br>$\pm$ 0.039  | 0.188<br>$\pm$ 0.040               | 0.020<br>$\pm$ 0.026  |
|           | Acc.2    | 0.275<br>$\pm$ 0.100               | <b>0.360</b><br>$\pm$ <b>0.063</b> | 0.230<br>$\pm$ 0.065 | 0.400<br>$\pm$ 0.121               | 0.255<br>$\pm$ 0.037 | 0.278<br>$\pm$ 0.098               | 0.272<br>$\pm$ 0.093 | 0.321<br>$\pm$ 0.043  | 0.085<br>$\pm$ 0.030  | 0.166<br>$\pm$ 0.072               | 0.034<br>$\pm$ 0.026               | 0.207<br>$\pm$ 0.070 | 0.303<br>$\pm$ 0.038               | 0.324<br>$\pm$ 0.108               | 0.081<br>$\pm$ 0.060  | 0.316<br>$\pm$ 0.109               | 0.051<br>$\pm$ 0.034  |
| Subject14 | $\kappa$ | 0.164<br>$\pm$ 0.053               | 0.200<br>$\pm$ 0.084               | 0.082<br>$\pm$ 0.071 | 0.241<br>$\pm$ 0.034               | 0.098<br>$\pm$ 0.047 | 0.256<br>$\pm$ 0.041               | 0.251<br>$\pm$ 0.066 | 0.226<br>$\pm$ 0.049  | 0.010<br>$\pm$ 0.029  | 0.031<br>$\pm$ 0.033               | 0.036<br>$\pm$ 0.023               | 0.082<br>$\pm$ 0.042 | 0.154<br>$\pm$ 0.036               | 0.400<br>$\pm$ 0.088               | 0.005<br>$\pm$ 0.021  | <b>0.282</b><br>$\pm$ <b>0.077</b> | 0.021<br>$\pm$ 0.033  |
|           | AUC      | 0.840<br>$\pm$ 0.055               | 0.835<br>$\pm$ 0.028               | 0.792<br>$\pm$ 0.029 | <b>0.894</b><br>$\pm$ <b>0.028</b> | 0.735<br>$\pm$ 0.050 | 0.816<br>$\pm$ 0.022               | 0.885<br>$\pm$ 0.012 | 0.846<br>$\pm$ 0.035  | 0.562<br>$\pm$ 0.021  | 0.678<br>$\pm$ 0.053               | 0.728<br>$\pm$ 0.047               | 0.737<br>$\pm$ 0.042 | 0.833<br>$\pm$ 0.025               | 0.907<br>$\pm$ 0.013               | 0.560<br>$\pm$ 0.031  | 0.791<br>$\pm$ 0.050               | 0.657<br>$\pm$ 0.054  |
|           | BAcc     | 0.185<br>$\pm$ 0.052               | 0.220<br>$\pm$ 0.082               | 0.105<br>$\pm$ 0.069 | 0.260<br>$\pm$ 0.034               | 0.121<br>$\pm$ 0.046 | 0.275<br>$\pm$ 0.040               | 0.270<br>$\pm$ 0.065 | 0.245<br>$\pm$ 0.048  | 0.035<br>$\pm$ 0.029  | 0.055<br>$\pm$ 0.033               | 0.060<br>$\pm$ 0.022               | 0.105<br>$\pm$ 0.041 | 0.175<br>$\pm$ 0.035               | 0.415<br>$\pm$ 0.086               | 0.030<br>$\pm$ 0.021  | <b>0.300</b><br>$\pm$ <b>0.075</b> | 0.045<br>$\pm$ 0.033  |
|           | Acc.1    | 0.185<br>$\pm$ 0.052               | 0.220<br>$\pm$ 0.082               | 0.105<br>$\pm$ 0.069 | 0.209<br>$\pm$ 0.090               | 0.116<br>$\pm$ 0.052 | 0.228<br>$\pm$ 0.018               | 0.197<br>$\pm$ 0.057 | 0.209<br>$\pm$ 0.054  | 0.031<br>$\pm$ 0.025  | 0.062<br>$\pm$ 0.044               | 0.094<br>$\pm$ 0.035               | 0.141<br>$\pm$ 0.063 | 0.175<br>$\pm$ 0.058               | 0.438<br>$\pm$ 0.046               | 0.019<br>$\pm$ 0.013  | <b>0.234</b><br>$\pm$ <b>0.086</b> | 0.028<br>$\pm$ 0.020  |
|           | Acc.2    | 0.275<br>$\pm$ 0.085               | 0.355<br>$\pm$ 0.091               | 0.230<br>$\pm$ 0.045 | 0.322<br>$\pm$ 0.083               | 0.194<br>$\pm$ 0.082 | <b>0.397</b><br>$\pm$ <b>0.051</b> | 0.356<br>$\pm$ 0.062 | 0.366<br>$\pm$ 0.075  | 0.056<br>$\pm$ 0.028  | 0.147<br>$\pm$ 0.067               | 0.194<br>$\pm$ 0.083               | 0.228<br>$\pm$ 0.107 | 0.287<br>$\pm$ 0.071               | 0.669<br>$\pm$ 0.040               | 0.044<br>$\pm$ 0.013  | 0.366<br>$\pm$ 0.095               | 0.047<br>$\pm$ 0.025  |
| Subject15 | $\kappa$ | 0.144<br>$\pm$ 0.050               | 0.144<br>$\pm$ 0.053               | 0.072<br>$\pm$ 0.093 | 0.179<br>$\pm$ 0.073               | 0.169<br>$\pm$ 0.088 | <b>0.179</b><br>$\pm$ <b>0.057</b> | 0.195<br>$\pm$ 0.090 | 0.174<br>$\pm$ 0.058  | -0.005<br>$\pm$ 0.033 | 0.010<br>$\pm$ 0.027               | 0.021<br>$\pm$ 0.021               | 0.051<br>$\pm$ 0.000 | 0.099<br>$\pm$ 0.084               | 0.113<br>$\pm$ 0.023               | 0.000<br>$\pm$ 0.018  | 0.154<br>$\pm$ 0.031               | 0.005<br>$\pm$ 0.028  |

Continued on next page



|         |                        | 7858            | 7859             | 7860            | 7861             | 7862            | 7863             | 7864             | 7865            | 7866            | 7867            | 7868            | 7869            | 7870            | 7871             | 7872             | 7873              | 7874              | 7875 | 7876 | 7877 | 7878 | 7879 | 7880 | 7881 | 7882 | 7883 | 7884 | 7885 | 7886 |  |
|---------|------------------------|-----------------|------------------|-----------------|------------------|-----------------|------------------|------------------|-----------------|-----------------|-----------------|-----------------|-----------------|-----------------|------------------|------------------|-------------------|-------------------|------|------|------|------|------|------|------|------|------|------|------|------|--|
| Subject | Metric                 | DeepConvnet     | EEGNet           | Conformer       | CTNet            | SSVEPDNN        | BIOT (f)         | BIOT (l)         | BENDR (f)       | BENDR (l)       | CBraMod (f)     | CBraMod (l)     | EEGPT (f)       | EEGPT (l)       | LaBraM (f)       | LaBraM (l)       | STEEGformer-s (f) | STEEGformer-s (l) |      |      |      |      |      |      |      |      |      |      |      |      |  |
|         | AUC                    | 0.762<br>±0.032 | 0.794<br>±0.056  | 0.722<br>±0.082 | 0.827<br>± 0.066 | 0.769<br>±0.120 | 0.709<br>±0.045  | 0.832<br>± 0.080 | 0.757<br>±0.073 | 0.558<br>±0.075 | 0.586<br>±0.037 | 0.579<br>±0.064 | 0.662<br>±0.035 | 0.764<br>±0.061 | 0.696<br>±0.034  | 0.518<br>±0.093  | 0.697<br>±0.031   | 0.566<br>±0.037   |      |      |      |      |      |      |      |      |      |      |      |      |  |
|         | BAcc                   | 0.165<br>±0.049 | 0.165<br>±0.052  | 0.095<br>±0.091 | 0.200<br>± 0.071 | 0.190<br>±0.086 | 0.200<br>± 0.056 | 0.215<br>± 0.088 | 0.195<br>±0.057 | 0.020<br>±0.033 | 0.034<br>±0.027 | 0.045<br>±0.021 | 0.075<br>±0.000 | 0.121<br>±0.082 | 0.135<br>±0.022  | 0.025<br>±0.018  | 0.175<br>±0.031   | 0.030<br>±0.027   |      |      |      |      |      |      |      |      |      |      |      |      |  |
|         | Acc.1                  | 0.165<br>±0.049 | 0.165<br>±0.052  | 0.134<br>±0.126 | 0.275<br>± 0.080 | 0.190<br>±0.086 | 0.219<br>±0.044  | 0.237<br>±0.089  | 0.234<br>±0.080 | 0.022<br>±0.030 | 0.045<br>±0.048 | 0.084<br>±0.050 | 0.084<br>±0.039 | 0.150<br>±0.107 | 0.188<br>±0.048  | 0.025<br>±0.024  | 0.241<br>± 0.055  | 0.047<br>±0.038   |      |      |      |      |      |      |      |      |      |      |      |      |  |
|         | Acc.2                  | 0.265<br>±0.068 | 0.305<br>±0.048  | 0.222<br>±0.110 | 0.438<br>± 0.134 | 0.295<br>±0.116 | 0.281<br>±0.090  | 0.394<br>± 0.130 | 0.325<br>±0.148 | 0.053<br>±0.028 | 0.102<br>±0.048 | 0.131<br>±0.080 | 0.184<br>±0.067 | 0.230<br>±0.121 | 0.381<br>±0.053  | 0.078<br>±0.057  | 0.372<br>±0.151   | 0.056<br>±0.041   |      |      |      |      |      |      |      |      |      |      |      |      |  |
|         | κ                      | 0.067<br>±0.092 | 0.185<br>± 0.058 | 0.046<br>±0.061 | 0.128<br>±0.079  | 0.144<br>±0.074 | 0.113<br>±0.088  | 0.149<br>±0.098  | 0.138<br>±0.111 | 0.021<br>±0.011 | 0.021<br>±0.025 | 0.041<br>±0.047 | 0.043<br>±0.042 | 0.132<br>±0.040 | 0.190<br>± 0.047 | -0.000<br>±0.018 | 0.125<br>±0.046   | 0.000<br>±0.018   |      |      |      |      |      |      |      |      |      |      |      |      |  |
|         | AUC                    | 0.695<br>±0.121 | 0.796<br>±0.061  | 0.669<br>±0.034 | 0.827<br>± 0.039 | 0.695<br>±0.087 | 0.694<br>±0.030  | 0.802<br>± 0.042 | 0.762<br>±0.052 | 0.564<br>±0.033 | 0.601<br>±0.036 | 0.689<br>±0.024 | 0.647<br>±0.049 | 0.759<br>±0.048 | 0.743<br>±0.038  | 0.536<br>±0.032  | 0.673<br>±0.023   | 0.578<br>±0.059   |      |      |      |      |      |      |      |      |      |      |      |      |  |
|         | BAcc                   | 0.090<br>±0.089 | 0.205<br>± 0.057 | 0.070<br>±0.060 | 0.150<br>±0.077  | 0.165<br>±0.072 | 0.135<br>±0.086  | 0.170<br>±0.096  | 0.160<br>±0.108 | 0.045<br>±0.011 | 0.046<br>±0.025 | 0.065<br>±0.045 | 0.067<br>±0.041 | 0.154<br>±0.039 | 0.210<br>± 0.045 | 0.025<br>±0.018  | 0.147<br>±0.045   | 0.025<br>±0.018   |      |      |      |      |      |      |      |      |      |      |      |      |  |
|         | Acc.1                  | 0.090<br>±0.089 | 0.205<br>±0.057  | 0.070<br>±0.060 | 0.150<br>±0.077  | 0.165<br>±0.072 | 0.159<br>±0.144  | 0.209<br>± 0.109 | 0.141<br>±0.094 | 0.056<br>±0.045 | 0.036<br>±0.026 | 0.069<br>±0.070 | 0.065<br>±0.021 | 0.150<br>±0.058 | 0.234<br>± 0.118 | 0.016<br>±0.011  | 0.109<br>±0.041   | 0.016<br>±0.011   |      |      |      |      |      |      |      |      |      |      |      |      |  |
|         | Acc.2                  | 0.165<br>±0.128 | 0.295<br>±0.099  | 0.145<br>±0.033 | 0.315<br>± 0.088 | 0.210<br>±0.107 | 0.287<br>±0.112  | 0.281<br>±0.119  | 0.253<br>±0.104 | 0.091<br>±0.068 | 0.117<br>±0.045 | 0.144<br>±0.105 | 0.107<br>±0.048 | 0.192<br>±0.065 | 0.309<br>± 0.122 | 0.037<br>±0.014  | 0.205<br>±0.051   | 0.037<br>±0.026   |      |      |      |      |      |      |      |      |      |      |      |      |  |
|         | κ                      | 0.164<br>±0.165 | 0.267<br>± 0.067 | 0.128<br>±0.031 | 0.251<br>±0.061  | 0.190<br>±0.133 | 0.231<br>±0.079  | 0.267<br>± 0.047 | 0.195<br>±0.102 | 0.031<br>±0.033 | 0.019<br>±0.018 | 0.005<br>±0.042 | 0.082<br>±0.049 | 0.084<br>±0.044 | 0.236<br>±0.046  | 0.013<br>±0.021  | 0.190<br>±0.051   | 0.021<br>±0.021   |      |      |      |      |      |      |      |      |      |      |      |      |  |
|         | AUC                    | 0.798<br>±0.144 | 0.902<br>± 0.015 | 0.786<br>±0.026 | 0.902<br>± 0.029 | 0.806<br>±0.175 | 0.813<br>±0.031  | 0.900<br>±0.027  | 0.806<br>±0.039 | 0.618<br>±0.034 | 0.608<br>±0.038 | 0.653<br>±0.013 | 0.690<br>±0.020 | 0.825<br>±0.039 | 0.745<br>±0.045  | 0.497<br>±0.038  | 0.723<br>±0.042   | 0.574<br>±0.034   |      |      |      |      |      |      |      |      |      |      |      |      |  |
|         | BAcc                   | 0.185<br>±0.161 | 0.285<br>± 0.065 | 0.150<br>±0.031 | 0.270<br>± 0.060 | 0.210<br>±0.129 | 0.250<br>±0.077  | 0.285<br>± 0.045 | 0.215<br>±0.099 | 0.055<br>±0.033 | 0.044<br>±0.018 | 0.030<br>±0.041 | 0.105<br>±0.048 | 0.107<br>±0.043 | 0.255<br>±0.045  | 0.037<br>±0.021  | 0.211<br>±0.050   | 0.045<br>±0.021   |      |      |      |      |      |      |      |      |      |      |      |      |  |
|         | Acc.1                  | 0.185<br>±0.161 | 0.285<br>±0.065  | 0.197<br>±0.039 | 0.253<br>±0.097  | 0.210<br>±0.129 | 0.316<br>± 0.115 | 0.300<br>±0.042  | 0.219<br>±0.138 | 0.062<br>±0.040 | 0.045<br>±0.029 | 0.028<br>±0.042 | 0.122<br>±0.056 | 0.127<br>±0.059 | 0.366<br>± 0.059 | 0.055<br>±0.056  | 0.306<br>±0.072   | 0.056<br>±0.032   |      |      |      |      |      |      |      |      |      |      |      |      |  |
|         | Acc.2                  | 0.290<br>±0.210 | 0.440<br>±0.045  | 0.287<br>±0.063 | 0.444<br>±0.133  | 0.325<br>±0.196 | 0.475<br>± 0.051 | 0.509<br>± 0.107 | 0.356<br>±0.148 | 0.109<br>±0.011 | 0.119<br>±0.062 | 0.062<br>±0.047 | 0.194<br>±0.097 | 0.301<br>±0.089 | 0.438<br>±0.076  | 0.122<br>±0.125  | 0.458<br>±0.097   | 0.103<br>±0.054   |      |      |      |      |      |      |      |      |      |      |      |      |  |
|         | κ                      | 0.087<br>±0.053 | 0.097<br>±0.058  | 0.062<br>±0.039 | 0.149<br>±0.088  | 0.092<br>±0.053 | 0.282<br>± 0.036 | 0.215<br>±0.053  | 0.141<br>±0.067 | 0.016<br>±0.045 | 0.064<br>±0.027 | 0.054<br>±0.021 | 0.036<br>±0.034 | 0.046<br>±0.038 | 0.333<br>± 0.069 | 0.005<br>±0.033  | 0.169<br>±0.029   | 0.010<br>±0.014   |      |      |      |      |      |      |      |      |      |      |      |      |  |
|         | AUC                    | 0.809<br>±0.035 | 0.766<br>±0.036  | 0.732<br>±0.046 | 0.870<br>±0.012  | 0.734<br>±0.073 | 0.809<br>±0.043  | 0.904<br>± 0.020 | 0.744<br>±0.030 | 0.525<br>±0.058 | 0.604<br>±0.027 | 0.694<br>±0.048 | 0.639<br>±0.057 | 0.766<br>±0.037 | 0.882<br>± 0.031 | 0.563<br>±0.033  | 0.742<br>±0.049   | 0.630<br>±0.038   |      |      |      |      |      |      |      |      |      |      |      |      |  |
|         |                        |                 |                  |                 |                  |                 |                  |                  |                 |                 |                 |                 |                 |                 |                  |                  |                   |                   |      |      |      |      |      |      |      |      |      |      |      |      |  |
|         | Continued on next page |                 |                  |                 |                  |                 |                  |                  |                 |                 |                 |                 |                 |                 |                  |                  |                   |                   |      |      |      |      |      |      |      |      |      |      |      |      |  |

| Subject   | Metric   | DeepConvnet     | EEGNet          | Conformer       | CTNet            | SSVEPDNN        | BIOT <sup>(f)</sup>            | BIOT <sup>(l)</sup>            | BENDR <sup>(f)</sup>           | BENDR <sup>(l)</sup> | CBraMod <sup>(f)</sup> | CBraMod <sup>(l)</sup> | EEGPT <sup>(f)</sup> | EEGPT <sup>(l)</sup>           | LaBraM <sup>(f)</sup>          | LaBraM <sup>(l)</sup> | STEEGformer-s <sup>(f)</sup> | STEEGformer-s <sup>(l)</sup> |
|-----------|----------|-----------------|-----------------|-----------------|------------------|-----------------|--------------------------------|--------------------------------|--------------------------------|----------------------|------------------------|------------------------|----------------------|--------------------------------|--------------------------------|-----------------------|------------------------------|------------------------------|
|           | BAcc     | 0.110<br>±0.052 | 0.120<br>±0.057 | 0.085<br>±0.038 | 0.170<br>±0.086  | 0.115<br>±0.052 | <b>0.300</b><br>± <b>0.035</b> | 0.235<br>±0.052                | 0.163<br>±0.065                | 0.041<br>±0.044      | 0.087<br>±0.027        | 0.078<br>±0.021        | 0.060<br>±0.034      | 0.070<br>±0.037                | 0.350<br>± 0.067               | 0.030<br>±0.033       | 0.190<br>±0.029              | 0.035<br>±0.014              |
|           | Acc.1    | 0.110<br>±0.052 | 0.120<br>±0.057 | 0.085<br>±0.038 | 0.170<br>±0.086  | 0.115<br>±0.052 | <b>0.319</b><br>± <b>0.082</b> | 0.184<br>±0.059                | 0.154<br>±0.079                | 0.031<br>±0.042      | 0.072<br>±0.031        | 0.084<br>±0.036        | 0.056<br>±0.044      | 0.062<br>±0.046                | 0.324<br>± 0.051               | 0.019<br>±0.020       | 0.138<br>±0.030              | 0.022<br>±0.009              |
|           | Acc.2    | 0.185<br>±0.052 | 0.220<br>±0.037 | 0.165<br>±0.060 | 0.265<br>±0.058  | 0.195<br>±0.069 | <b>0.428</b><br>± <b>0.107</b> | 0.334<br>±0.082                | 0.246<br>±0.122                | 0.045<br>±0.043      | 0.121<br>±0.044        | 0.143<br>±0.063        | 0.113<br>±0.055      | 0.097<br>±0.045                | 0.498<br>± 0.074               | 0.031<br>±0.019       | 0.253<br>±0.083              | 0.031<br>±0.011              |
|           | $\kappa$ | 0.047<br>±0.038 | 0.097<br>±0.049 | 0.036<br>±0.059 | 0.097<br>±0.038  | 0.051<br>±0.060 | 0.097<br>±0.056                | 0.087<br>±0.039                | <b>0.118</b><br>± <b>0.047</b> | 0.031<br>±0.021      | 0.041<br>±0.050        | 0.026<br>±0.018        | 0.051<br>±0.051      | 0.108<br>±0.038                | 0.164<br>± 0.053               | -0.010<br>±0.014      | 0.082<br>±0.028              | 0.015<br>±0.023              |
|           | AUC      | 0.808<br>±0.035 | 0.782<br>±0.037 | 0.750<br>±0.043 | 0.836<br>± 0.022 | 0.784<br>±0.052 | 0.639<br>±0.054                | 0.718<br>±0.041                | 0.733<br>±0.043                | 0.641<br>±0.040      | 0.641<br>±0.048        | 0.775<br>±0.006        | 0.633<br>±0.043      | <b>0.824</b><br>± <b>0.019</b> | 0.714<br>±0.017                | 0.520<br>±0.046       | 0.652<br>±0.031              | 0.646<br>±0.041              |
|           | BAcc     | 0.071<br>±0.037 | 0.120<br>±0.048 | 0.060<br>±0.058 | 0.120<br>±0.037  | 0.075<br>±0.059 | 0.120<br>±0.054                | 0.110<br>±0.038                | <b>0.140</b><br>± <b>0.045</b> | 0.055<br>±0.021      | 0.065<br>±0.049        | 0.050<br>±0.018        | 0.075<br>±0.050      | 0.130<br>±0.037                | 0.185<br>± 0.052               | 0.015<br>±0.014       | 0.105<br>±0.027              | 0.040<br>±0.022              |
| Subject19 | Acc.1    | 0.066<br>±0.038 | 0.120<br>±0.048 | 0.060<br>±0.058 | 0.122<br>±0.082  | 0.075<br>±0.059 | 0.122<br>±0.064                | 0.125<br>±0.035                | 0.134<br>±0.051                | 0.053<br>±0.038      | 0.050<br>±0.043        | 0.059<br>±0.028        | 0.084<br>±0.063      | <b>0.147</b><br>± <b>0.092</b> | 0.191<br>± 0.036               | 0.009<br>±0.009       | 0.075<br>±0.026              | 0.025<br>±0.014              |
|           | Acc.2    | 0.159<br>±0.034 | 0.220<br>±0.078 | 0.155<br>±0.021 | 0.209<br>±0.079  | 0.185<br>±0.055 | 0.200<br>±0.047                | 0.212<br>±0.053                | 0.169<br>±0.061                | 0.138<br>±0.056      | 0.078<br>±0.049        | 0.184<br>±0.076        | 0.141<br>±0.076      | <b>0.228</b><br>± <b>0.084</b> | 0.278<br>± 0.036               | 0.028<br>±0.023       | 0.150<br>±0.038              | 0.044<br>±0.013              |
| Subject2  | $\kappa$ | 0.036<br>±0.023 | 0.041<br>±0.059 | 0.021<br>±0.033 | 0.070<br>±0.048  | 0.041<br>±0.023 | 0.118<br>± 0.069               | 0.067<br>±0.064                | 0.005<br>±0.011                | 0.000<br>±0.026      | 0.031<br>±0.046        | 0.026<br>±0.018        | 0.026<br>±0.031      | 0.036<br>±0.053                | <b>0.073</b><br>± <b>0.025</b> | 0.005<br>±0.033       | 0.046<br>±0.028              | 0.000<br>±0.024              |
|           | AUC      | 0.641<br>±0.041 | 0.620<br>±0.065 | 0.694<br>±0.040 | 0.732<br>± 0.061 | 0.608<br>±0.057 | 0.658<br>±0.058                | <b>0.730</b><br>± <b>0.059</b> | 0.592<br>±0.044                | 0.459<br>±0.058      | 0.607<br>±0.057        | 0.632<br>±0.035        | 0.582<br>±0.046      | 0.657<br>±0.046                | 0.656<br>±0.032                | 0.510<br>±0.043       | 0.634<br>±0.053              | 0.578<br>±0.047              |
|           | BAcc     | 0.060<br>±0.022 | 0.065<br>±0.058 | 0.045<br>±0.033 | 0.093<br>±0.047  | 0.065<br>±0.022 | 0.140<br>± 0.068               | 0.090<br>±0.063                | 0.030<br>±0.011                | 0.025<br>±0.025      | 0.055<br>±0.045        | 0.050<br>±0.018        | 0.050<br>±0.031      | 0.060<br>±0.052                | <b>0.096</b><br>± <b>0.025</b> | 0.030<br>±0.033       | 0.070<br>±0.027              | 0.025<br>±0.024              |
|           | Acc.1    | 0.060<br>±0.022 | 0.065<br>±0.058 | 0.045<br>±0.033 | 0.098<br>±0.094  | 0.065<br>±0.022 | <b>0.134</b><br>± <b>0.042</b> | 0.094<br>±0.083                | 0.047<br>±0.029                | 0.034<br>±0.036      | 0.078<br>±0.062        | 0.078<br>±0.011        | 0.069<br>±0.034      | 0.075<br>±0.062                | 0.169<br>± 0.075               | 0.037<br>±0.045       | 0.081<br>±0.053              | 0.016<br>±0.015              |
|           | Acc.2    | 0.120<br>±0.033 | 0.100<br>±0.066 | 0.105<br>±0.037 | 0.154<br>±0.094  | 0.120<br>±0.048 | <b>0.203</b><br>± <b>0.080</b> | 0.172<br>±0.109                | 0.094<br>±0.069                | 0.056<br>±0.036      | 0.128<br>±0.066        | 0.113<br>±0.043        | 0.128<br>±0.040      | 0.163<br>±0.092                | 0.253<br>± 0.112               | 0.069<br>±0.026       | 0.138<br>±0.111              | 0.034<br>±0.007              |
|           | $\kappa$ | 0.082<br>±0.028 | 0.144<br>±0.039 | 0.077<br>±0.041 | 0.154<br>±0.085  | 0.138<br>±0.047 | <b>0.272</b><br>± <b>0.074</b> | 0.210<br>±0.095                | 0.147<br>±0.069                | 0.028<br>±0.033      | 0.041<br>±0.043        | 0.041<br>±0.029        | 0.103<br>±0.084      | 0.179<br>±0.044                | 0.282<br>± 0.057               | -0.010<br>±0.014      | 0.200<br>±0.102              | 0.036<br>±0.028              |
| Subject20 | AUC      | 0.767<br>±0.047 | 0.799<br>±0.030 | 0.724<br>±0.065 | 0.850<br>±0.023  | 0.768<br>±0.024 | 0.797<br>±0.041                | 0.860<br>± 0.040               | 0.712<br>±0.028                | 0.602<br>±0.047      | 0.653<br>±0.024        | 0.740<br>±0.045        | 0.682<br>±0.065      | <b>0.853</b><br>± <b>0.032</b> | 0.803<br>±0.035                | 0.543<br>±0.066       | 0.734<br>±0.023              | 0.654<br>±0.039              |
|           | BAcc     | 0.105<br>±0.027 | 0.165<br>±0.038 | 0.100<br>±0.040 | 0.175<br>±0.083  | 0.160<br>±0.045 | <b>0.290</b><br>± <b>0.072</b> | 0.230<br>±0.093                | 0.168<br>±0.067                | 0.053<br>±0.032      | 0.065<br>±0.042        | 0.065<br>±0.029        | 0.065<br>±0.082      | 0.125<br>±0.043                | 0.300<br>± 0.056               | 0.015<br>±0.014       | 0.220<br>±0.099              | 0.060<br>±0.027              |

Continued on next page

| Subject   | Metric   | DeepConvnet | EEGNet       | Conformer   | CTNet        | SSVEPDNN    | BIOT (f)     | BIOT (l)     | BENDR (f)   | BENDR (l)   | CBraMod (f) | CBraMod (l)  | EEGPT (f)   | EEGPT (l)    | LaBraM (f)                    | LaBraM (l)  | STEEGformer-s (f) | STEEGformer-s (l) |
|-----------|----------|-------------|--------------|-------------|--------------|-------------|--------------|--------------|-------------|-------------|-------------|--------------|-------------|--------------|-------------------------------|-------------|-------------------|-------------------|
| Subject20 | Acc.1    | 0.105       | 0.165        | 0.081       | 0.170        | 0.160       | 0.331        | 0.228        | 0.145       | 0.043       | 0.084       | 0.078        | 0.125       | 0.219        | <b>0.328</b>                  | 0.009       | 0.212             | 0.037             |
|           |          | $\pm 0.027$ | $\pm 0.038$  | $\pm 0.030$ | $\pm 0.067$  | $\pm 0.045$ | $\pm 0.061$  | $\pm 0.102$  | $\pm 0.050$ | $\pm 0.031$ | $\pm 0.065$ | $\pm 0.065$  | $\pm 0.080$ | $\pm 0.074$  | <b><math>\pm 0.077</math></b> | $\pm 0.009$ | $\pm 0.125$       | $\pm 0.017$       |
|           | Acc.2    | 0.160       | 0.270        | 0.106       | 0.277        | 0.230       | <b>0.428</b> | 0.388        | 0.257       | 0.076       | 0.147       | 0.141        | 0.221       | 0.344        | 0.450                         | 0.053       | 0.281             | 0.047             |
|           |          | $\pm 0.038$ | $\pm 0.072$  | $\pm 0.046$ | $\pm 0.118$  | $\pm 0.062$ | $\pm 0.063$  | $\pm 0.092$  | $\pm 0.060$ | $\pm 0.059$ | $\pm 0.042$ | $\pm 0.076$  | $\pm 0.109$ | $\pm 0.077$  | $\pm 0.112$                   | $\pm 0.050$ | $\pm 0.133$       | $\pm 0.018$       |
|           | $\kappa$ | 0.195       | <b>0.349</b> | 0.185       | 0.359        | 0.174       | 0.215        | 0.241        | 0.221       | 0.031       | 0.041       | 0.000        | 0.133       | 0.252        | 0.169                         | 0.021       | 0.241             | 0.036             |
|           |          | $\pm 0.165$ | $\pm 0.067$  | $\pm 0.064$ | $\pm 0.101$  | $\pm 0.033$ | $\pm 0.067$  | $\pm 0.059$  | $\pm 0.043$ | $\pm 0.038$ | $\pm 0.043$ | $\pm 0.000$  | $\pm 0.033$ | $\pm 0.055$  | $\pm 0.023$                   | $\pm 0.021$ | $\pm 0.053$       | $\pm 0.029$       |
| Subject21 | AUC      | 0.837       | <b>0.903</b> | 0.836       | 0.930        | 0.852       | 0.781        | 0.882        | 0.814       | 0.665       | 0.595       | 0.531        | 0.723       | 0.890        | 0.785                         | 0.527       | 0.784             | 0.700             |
|           |          | $\pm 0.094$ | $\pm 0.028$  | $\pm 0.036$ | $\pm 0.024$  | $\pm 0.032$ | $\pm 0.057$  | $\pm 0.020$  | $\pm 0.039$ | $\pm 0.045$ | $\pm 0.041$ | $\pm 0.056$  | $\pm 0.023$ | $\pm 0.024$  | $\pm 0.045$                   | $\pm 0.032$ | $\pm 0.018$       | $\pm 0.043$       |
|           | BAcc     | 0.215       | <b>0.365</b> | 0.205       | 0.375        | 0.195       | 0.235        | 0.260        | 0.240       | 0.055       | 0.065       | 0.025        | 0.155       | 0.271        | 0.190                         | 0.045       | 0.260             | 0.060             |
|           |          | $\pm 0.161$ | $\pm 0.065$  | $\pm 0.062$ | $\pm 0.098$  | $\pm 0.033$ | $\pm 0.065$  | $\pm 0.058$  | $\pm 0.042$ | $\pm 0.037$ | $\pm 0.042$ | $\pm 0.000$  | $\pm 0.033$ | $\pm 0.053$  | $\pm 0.022$                   | $\pm 0.021$ | $\pm 0.052$       | $\pm 0.029$       |
|           | Acc.1    | 0.198       | <b>0.312</b> | 0.156       | 0.422        | 0.195       | 0.222        | 0.228        | 0.244       | 0.034       | 0.078       | 0.025        | 0.181       | 0.224        | 0.175                         | 0.056       | 0.237             | 0.078             |
|           |          | $\pm 0.146$ | $\pm 0.058$  | $\pm 0.055$ | $\pm 0.127$  | $\pm 0.033$ | $\pm 0.055$  | $\pm 0.065$  | $\pm 0.026$ | $\pm 0.023$ | $\pm 0.062$ | $\pm 0.021$  | $\pm 0.065$ | $\pm 0.055$  | $\pm 0.047$                   | $\pm 0.026$ | $\pm 0.080$       | $\pm 0.046$       |
| Subject22 | Acc.2    | 0.279       | <b>0.409</b> | 0.234       | 0.588        | 0.340       | 0.350        | 0.391        | 0.356       | 0.062       | 0.113       | 0.075        | 0.212       | 0.354        | 0.287                         | 0.066       | 0.366             | 0.138             |
|           |          | $\pm 0.178$ | $\pm 0.077$  | $\pm 0.080$ | $\pm 0.136$  | $\pm 0.063$ | $\pm 0.078$  | $\pm 0.076$  | $\pm 0.030$ | $\pm 0.062$ | $\pm 0.081$ | $\pm 0.026$  | $\pm 0.063$ | $\pm 0.077$  | $\pm 0.089$                   | $\pm 0.023$ | $\pm 0.116$       | $\pm 0.039$       |
|           | $\kappa$ | 0.333       | 0.431        | 0.328       | 0.497        | 0.313       | 0.395        | 0.354        | 0.364       | 0.051       | 0.062       | 0.041        | 0.185       | 0.366        | <b>0.436</b>                  | 0.010       | 0.231             | 0.000             |
|           |          | $\pm 0.252$ | $\pm 0.038$  | $\pm 0.093$ | $\pm 0.095$  | $\pm 0.049$ | $\pm 0.023$  | $\pm 0.078$  | $\pm 0.097$ | $\pm 0.057$ | $\pm 0.053$ | $\pm 0.034$  | $\pm 0.095$ | $\pm 0.059$  | $\pm 0.036$                   | $\pm 0.029$ | $\pm 0.096$       | $\pm 0.018$       |
|           | AUC      | 0.874       | 0.939        | 0.900       | 0.954        | 0.893       | 0.892        | <b>0.946</b> | 0.909       | 0.699       | 0.669       | 0.761        | 0.764       | 0.913        | 0.855                         | 0.591       | 0.798             | 0.629             |
|           |          | $\pm 0.112$ | $\pm 0.018$  | $\pm 0.046$ | $\pm 0.014$  | $\pm 0.040$ | $\pm 0.042$  | $\pm 0.018$  | $\pm 0.029$ | $\pm 0.059$ | $\pm 0.055$ | $\pm 0.052$  | $\pm 0.043$ | $\pm 0.022$  | $\pm 0.026$                   | $\pm 0.048$ | $\pm 0.058$       | $\pm 0.050$       |
| Subject23 | BAcc     | 0.350       | 0.445        | 0.345       | 0.510        | 0.330       | 0.410        | 0.370        | 0.380       | 0.075       | 0.085       | 0.065        | 0.205       | 0.382        | <b>0.450</b>                  | 0.035       | 0.250             | 0.025             |
|           |          | $\pm 0.246$ | $\pm 0.037$  | $\pm 0.091$ | $\pm 0.093$  | $\pm 0.048$ | $\pm 0.022$  | $\pm 0.076$  | $\pm 0.094$ | $\pm 0.056$ | $\pm 0.052$ | $\pm 0.034$  | $\pm 0.093$ | $\pm 0.057$  | $\pm 0.035$                   | $\pm 0.029$ | $\pm 0.094$       | $\pm 0.018$       |
|           | Acc.1    | 0.350       | 0.445        | 0.345       | <b>0.510</b> | 0.330       | 0.425        | 0.391        | 0.378       | 0.066       | 0.100       | 0.106        | 0.259       | 0.460        | 0.516                         | 0.050       | 0.344             | 0.013             |
|           |          | $\pm 0.246$ | $\pm 0.037$  | $\pm 0.091$ | $\pm 0.093$  | $\pm 0.048$ | $\pm 0.074$  | $\pm 0.067$  | $\pm 0.052$ | $\pm 0.058$ | $\pm 0.074$ | $\pm 0.037$  | $\pm 0.122$ | $\pm 0.090$  | $\pm 0.022$                   | $\pm 0.030$ | $\pm 0.130$       | $\pm 0.013$       |
|           | Acc.2    | 0.475       | 0.585        | 0.480       | 0.685        | 0.455       | <b>0.653</b> | 0.616        | 0.553       | 0.125       | 0.172       | 0.200        | 0.359       | 0.560        | 0.609                         | 0.113       | 0.487             | 0.059             |
|           |          | $\pm 0.300$ | $\pm 0.086$  | $\pm 0.123$ | $\pm 0.068$  | $\pm 0.078$ | $\pm 0.046$  | $\pm 0.103$  | $\pm 0.090$ | $\pm 0.083$ | $\pm 0.067$ | $\pm 0.095$  | $\pm 0.074$ | $\pm 0.065$  | $\pm 0.035$                   | $\pm 0.020$ | $\pm 0.074$       | $\pm 0.034$       |
| Subject24 | $\kappa$ | -0.000      | 0.021        | 0.021       | 0.013        | 0.005       | 0.021        | 0.010        | 0.015       | 0.000       | 0.031       | <b>0.046</b> | 0.036       | 0.067        | 0.015                         | 0.000       | -0.005            | 0.005             |
|           |          | $\pm 0.026$ | $\pm 0.028$  | $\pm 0.033$ | $\pm 0.031$  | $\pm 0.021$ | $\pm 0.033$  | $\pm 0.043$  | $\pm 0.014$ | $\pm 0.031$ | $\pm 0.028$ | $\pm 0.021$  | $\pm 0.050$ | $\pm 0.023$  | $\pm 0.029$                   | $\pm 0.018$ | $\pm 0.021$       | $\pm 0.021$       |
|           | AUC      | 0.549       | 0.556        | 0.554       | 0.562        | 0.548       | 0.532        | 0.508        | 0.551       | 0.561       | 0.602       | 0.735        | 0.570       | <b>0.644</b> | 0.586                         | 0.520       | 0.518             | 0.549             |
|           |          | $\pm 0.026$ | $\pm 0.032$  | $\pm 0.050$ | $\pm 0.041$  | $\pm 0.049$ | $\pm 0.043$  | $\pm 0.034$  | $\pm 0.022$ | $\pm 0.026$ | $\pm 0.053$ | $\pm 0.039$  | $\pm 0.054$ | $\pm 0.029$  | $\pm 0.024$                   | $\pm 0.037$ | $\pm 0.023$       | $\pm 0.036$       |
|           | BAcc     | 0.025       | 0.045        | 0.045       | 0.037        | 0.030       | 0.045        | 0.035        | 0.040       | 0.025       | 0.055       | <b>0.070</b> | 0.060       | 0.090        | 0.040                         | 0.025       | 0.020             | 0.030             |
|           |          | $\pm 0.025$ | $\pm 0.027$  | $\pm 0.033$ | $\pm 0.031$  | $\pm 0.021$ | $\pm 0.033$  | $\pm 0.042$  | $\pm 0.014$ | $\pm 0.031$ | $\pm 0.027$ | $\pm 0.021$  | $\pm 0.049$ | $\pm 0.022$  | $\pm 0.029$                   | $\pm 0.018$ | $\pm 0.021$       | $\pm 0.021$       |
| Subject25 | Acc.1    | 0.025       | 0.045        | 0.045       | 0.034        | 0.030       | 0.028        | 0.031        | 0.034       | 0.034       | 0.062       | <b>0.119</b> | 0.075       | 0.122        | 0.062                         | 0.044       | 0.031             | 0.037             |
|           |          | $\pm 0.025$ | $\pm 0.027$  | $\pm 0.033$ | $\pm 0.030$  | $\pm 0.021$ | $\pm 0.020$  | $\pm 0.031$  | $\pm 0.026$ | $\pm 0.042$ | $\pm 0.054$ | $\pm 0.050$  | $\pm 0.069$ | $\pm 0.020$  | $\pm 0.049$                   | $\pm 0.028$ | $\pm 0.037$       | $\pm 0.032$       |

Continued on next page

| Subject   | Metric   | DeepConvnet      | EEGNet           | Conformer        | CTNet            | SSVEPDNN        | BIOT (f)        | BIOT (l)        | BENDR (f)       | BENDR (l)        | CBraMod (f)     | CBraMod (l)     | EEGPT (f)       | EEGPT (l)       | LaBraM (f)      | LaBraM (l)       | STEEGformer-s (f) | STEEGformer-s (l) |
|-----------|----------|------------------|------------------|------------------|------------------|-----------------|-----------------|-----------------|-----------------|------------------|-----------------|-----------------|-----------------|-----------------|-----------------|------------------|-------------------|-------------------|
| Subject24 | Acc.2    | 0.070<br>±0.021  | 0.070<br>±0.048  | 0.065<br>±0.045  | 0.082<br>±0.044  | 0.055<br>±0.021 | 0.044<br>±0.023 | 0.059<br>±0.052 | 0.069<br>±0.024 | 0.084<br>±0.060  | 0.103<br>±0.068 | 0.188<br>±0.068 | 0.116<br>±0.094 | 0.166<br>±0.042 | 0.147<br>±0.034 | 0.075<br>±0.030  | 0.100<br>±0.059   | 0.059<br>±0.046   |
|           | $\kappa$ | -0.000<br>±0.018 | 0.041<br>±0.039  | 0.021<br>±0.042  | 0.021<br>±0.038  | 0.026<br>±0.000 | 0.015<br>±0.014 | 0.005<br>±0.028 | 0.000<br>±0.031 | 0.010<br>±0.043  | 0.010<br>±0.030 | 0.031<br>±0.021 | 0.036<br>±0.043 | 0.056<br>±0.049 | 0.077<br>±0.044 | 0.031<br>±0.028  | 0.026<br>±0.031   | 0.022<br>±0.034   |
|           | AUC      | 0.610<br>±0.047  | 0.590<br>±0.027  | 0.620<br>±0.026  | 0.649<br>±0.039  | 0.567<br>±0.031 | 0.563<br>±0.027 | 0.621<br>±0.050 | 0.582<br>±0.036 | 0.545<br>±0.029  | 0.603<br>±0.030 | 0.671<br>±0.031 | 0.561<br>±0.042 | 0.712<br>±0.027 | 0.638<br>±0.022 | 0.549<br>±0.029  | 0.559<br>±0.016   | 0.630<br>±0.027   |
|           | BAcc     | 0.025<br>±0.018  | 0.065<br>±0.038  | 0.045<br>±0.041  | 0.046<br>±0.037  | 0.050<br>±0.000 | 0.040<br>±0.014 | 0.030<br>±0.027 | 0.025<br>±0.031 | 0.035<br>±0.042  | 0.034<br>±0.030 | 0.056<br>±0.021 | 0.060<br>±0.042 | 0.080<br>±0.048 | 0.100<br>±0.043 | 0.055<br>±0.027  | 0.050<br>±0.031   | 0.046<br>±0.034   |
|           | Acc.1    | 0.025<br>±0.018  | 0.065<br>±0.038  | 0.045<br>±0.041  | 0.029<br>±0.023  | 0.050<br>±0.000 | 0.034<br>±0.026 | 0.019<br>±0.017 | 0.025<br>±0.039 | 0.022<br>±0.026  | 0.057<br>±0.067 | 0.061<br>±0.036 | 0.075<br>±0.045 | 0.087<br>±0.063 | 0.091<br>±0.026 | 0.031<br>±0.022  | 0.031<br>±0.019   | 0.029<br>±0.021   |
|           | Acc.2    | 0.095<br>±0.033  | 0.100<br>±0.050  | 0.095<br>±0.045  | 0.062<br>±0.043  | 0.095<br>±0.011 | 0.075<br>±0.047 | 0.053<br>±0.030 | 0.069<br>±0.070 | 0.050<br>±0.028  | 0.094<br>±0.060 | 0.090<br>±0.044 | 0.125<br>±0.080 | 0.169<br>±0.081 | 0.141<br>±0.040 | 0.044<br>±0.020  | 0.056<br>±0.021   | 0.054<br>±0.018   |
|           | $\kappa$ | -0.021<br>±0.011 | -0.026<br>±0.000 | -0.021<br>±0.011 | -0.010<br>±0.014 | 0.031<br>±0.021 | 0.118<br>±0.039 | 0.041<br>±0.043 | 0.103<br>±0.041 | -0.021<br>±0.011 | 0.015<br>±0.023 | 0.010<br>±0.014 | 0.000<br>±0.044 | 0.010<br>±0.023 | 0.108<br>±0.042 | -0.000<br>±0.018 | 0.149<br>±0.028   | 0.015<br>±0.053   |
|           | AUC      | 0.499<br>±0.060  | 0.408<br>±0.034  | 0.411<br>±0.022  | 0.406<br>±0.015  | 0.626<br>±0.063 | 0.688<br>±0.051 | 0.612<br>±0.074 | 0.726<br>±0.029 | 0.346<br>±0.033  | 0.517<br>±0.040 | 0.481<br>±0.026 | 0.558<br>±0.039 | 0.465<br>±0.018 | 0.707<br>±0.040 | 0.539<br>±0.058  | 0.719<br>±0.036   | 0.673<br>±0.041   |
|           | BAcc     | 0.005<br>±0.011  | 0.000<br>±0.000  | 0.005<br>±0.011  | 0.015<br>±0.014  | 0.055<br>±0.021 | 0.140<br>±0.038 | 0.065<br>±0.042 | 0.125<br>±0.040 | 0.005<br>±0.011  | 0.040<br>±0.022 | 0.035<br>±0.014 | 0.025<br>±0.043 | 0.035<br>±0.022 | 0.130<br>±0.041 | 0.025<br>±0.018  | 0.170<br>±0.027   | 0.040<br>±0.052   |
|           | Acc.1    | 0.005<br>±0.011  | 0.000<br>±0.000  | 0.005<br>±0.011  | 0.019<br>±0.026  | 0.055<br>±0.021 | 0.172<br>±0.044 | 0.106<br>±0.065 | 0.144<br>±0.056 | 0.003<br>±0.007  | 0.034<br>±0.028 | 0.050<br>±0.032 | 0.016<br>±0.027 | 0.031<br>±0.029 | 0.128<br>±0.078 | 0.044<br>±0.034  | 0.219<br>±0.088   | 0.053<br>±0.093   |
|           | Acc.2    | 0.020<br>±0.021  | 0.005<br>±0.011  | 0.015<br>±0.014  | 0.019<br>±0.026  | 0.095<br>±0.033 | 0.234<br>±0.070 | 0.125<br>±0.066 | 0.231<br>±0.098 | 0.009<br>±0.014  | 0.056<br>±0.032 | 0.081<br>±0.060 | 0.047<br>±0.033 | 0.062<br>±0.052 | 0.287<br>±0.053 | 0.119<br>±0.057  | 0.300<br>±0.078   | 0.109<br>±0.076   |
| Subject26 | $\kappa$ | 0.067<br>±0.023  | 0.108<br>±0.056  | 0.072<br>±0.049  | 0.149<br>±0.046  | 0.036<br>±0.023 | 0.149<br>±0.117 | 0.149<br>±0.086 | 0.060<br>±0.021 | 0.010<br>±0.027  | 0.029<br>±0.018 | 0.029<br>±0.032 | 0.043<br>±0.042 | 0.067<br>±0.043 | 0.107<br>±0.052 | -0.010<br>±0.014 | 0.059<br>±0.044   | 0.021<br>±0.011   |
|           | AUC      | 0.711<br>±0.045  | 0.717<br>±0.019  | 0.711<br>±0.018  | 0.791<br>±0.025  | 0.672<br>±0.040 | 0.713<br>±0.063 | 0.763<br>±0.052 | 0.678<br>±0.042 | 0.551<br>±0.040  | 0.618<br>±0.029 | 0.715<br>±0.029 | 0.636<br>±0.054 | 0.728<br>±0.044 | 0.662<br>±0.033 | 0.523<br>±0.035  | 0.618<br>±0.036   | 0.565<br>±0.013   |
|           | BAcc     | 0.090<br>±0.022  | 0.130<br>±0.054  | 0.095<br>±0.048  | 0.170<br>±0.045  | 0.060<br>±0.022 | 0.170<br>±0.114 | 0.170<br>±0.084 | 0.083<br>±0.020 | 0.034<br>±0.027  | 0.054<br>±0.017 | 0.053<br>±0.031 | 0.067<br>±0.041 | 0.090<br>±0.042 | 0.129<br>±0.051 | 0.015<br>±0.014  | 0.082<br>±0.043   | 0.045<br>±0.011   |
|           | Acc.1    | 0.090<br>±0.022  | 0.130<br>±0.054  | 0.095<br>±0.048  | 0.170<br>±0.045  | 0.060<br>±0.022 | 0.191<br>±0.121 | 0.247<br>±0.177 | 0.099<br>±0.032 | 0.045<br>±0.038  | 0.060<br>±0.037 | 0.068<br>±0.051 | 0.073<br>±0.063 | 0.131<br>±0.066 | 0.143<br>±0.086 | 0.028<br>±0.032  | 0.106<br>±0.075   | 0.047<br>±0.022   |
|           | Acc.2    | 0.185<br>±0.042  | 0.190<br>±0.063  | 0.165<br>±0.068  | 0.305<br>±0.082  | 0.145<br>±0.041 | 0.312<br>±0.082 | 0.353<br>±0.151 | 0.182<br>±0.082 | 0.078<br>±0.065  | 0.114<br>±0.032 | 0.139<br>±0.056 | 0.115<br>±0.065 | 0.225<br>±0.116 | 0.232<br>±0.056 | 0.053<br>±0.021  | 0.153<br>±0.086   | 0.072<br>±0.042   |

Continued on next page

| Subject   | Metric   | DeepConvnet                 | EEGNet                      | Conformer                   | CTNet                | SSVEPDNN             | BIOT <sup>(j)</sup>  | BIOT <sup>(l)</sup>  | BENDR <sup>(f)</sup>        | BENDR <sup>(l)</sup>  | CBraMod <sup>(f)</sup>      | CBraMod <sup>(l)</sup>      | EEGPT <sup>(f)</sup> | EEGPT <sup>(l)</sup>        | LaBraM <sup>(f)</sup>       | LaBraM <sup>(l)</sup> | STEEGformer-s <sup>(f)</sup> | STEEGformer-s <sup>(l)</sup> |
|-----------|----------|-----------------------------|-----------------------------|-----------------------------|----------------------|----------------------|----------------------|----------------------|-----------------------------|-----------------------|-----------------------------|-----------------------------|----------------------|-----------------------------|-----------------------------|-----------------------|------------------------------|------------------------------|
| Subject27 | $\kappa$ | 0.021<br>$\pm 0.021$        | 0.041<br>$\pm 0.029$        | 0.036<br>$\pm 0.014$        | 0.021<br>$\pm 0.019$ | 0.015<br>$\pm 0.029$ | 0.000<br>$\pm 0.018$ | 0.036<br>$\pm 0.023$ | <b>0.058</b><br>$\pm 0.045$ | 0.000<br>$\pm 0.018$  | 0.048<br>$\pm 0.058$        | 0.030<br>$\pm 0.030$        | 0.005<br>$\pm 0.011$ | 0.031<br>$\pm 0.033$        | 0.061<br>$\pm 0.027$        | 0.015<br>$\pm 0.034$  | 0.046<br>$\pm 0.031$         | -0.026<br>$\pm 0.000$        |
|           | AUC      | 0.604<br>$\pm 0.032$        | 0.630<br>$\pm 0.028$        | 0.605<br>$\pm 0.080$        | 0.649<br>$\pm 0.050$ | 0.557<br>$\pm 0.040$ | 0.568<br>$\pm 0.024$ | 0.638<br>$\pm 0.057$ | 0.605<br>$\pm 0.040$        | 0.490<br>$\pm 0.056$  | 0.548<br>$\pm 0.042$        | <b>0.638</b><br>$\pm 0.065$ | 0.560<br>$\pm 0.038$ | 0.625<br>$\pm 0.035$        | 0.632<br>$\pm 0.019$        | 0.522<br>$\pm 0.030$  | 0.554<br>$\pm 0.032$         | 0.546<br>$\pm 0.029$         |
|           | BAcc     | 0.045<br>$\pm 0.021$        | 0.065<br>$\pm 0.029$        | 0.060<br>$\pm 0.014$        | 0.046<br>$\pm 0.019$ | 0.040<br>$\pm 0.029$ | 0.025<br>$\pm 0.018$ | 0.060<br>$\pm 0.022$ | <b>0.081</b><br>$\pm 0.044$ | 0.025<br>$\pm 0.018$  | 0.072<br>$\pm 0.057$        | 0.054<br>$\pm 0.029$        | 0.030<br>$\pm 0.011$ | 0.055<br>$\pm 0.033$        | 0.084<br>$\pm 0.027$        | 0.040<br>$\pm 0.034$  | 0.069<br>$\pm 0.030$         | 0.000<br>$\pm 0.000$         |
|           | Acc.1    | 0.045<br>$\pm 0.021$        | 0.065<br>$\pm 0.029$        | 0.060<br>$\pm 0.014$        | 0.044<br>$\pm 0.041$ | 0.040<br>$\pm 0.029$ | 0.016<br>$\pm 0.011$ | 0.047<br>$\pm 0.029$ | 0.062<br>$\pm 0.022$        | 0.026<br>$\pm 0.027$  | <b>0.082</b><br>$\pm 0.068$ | 0.042<br>$\pm 0.035$        | 0.037<br>$\pm 0.024$ | 0.062<br>$\pm 0.044$        | 0.082<br>$\pm 0.042$        | 0.062<br>$\pm 0.057$  | 0.080<br>$\pm 0.048$         | 0.000<br>$\pm 0.000$         |
|           | Acc.2    | 0.080<br>$\pm 0.011$        | <b>0.150</b><br>$\pm 0.035$ | 0.090<br>$\pm 0.029$        | 0.099<br>$\pm 0.064$ | 0.060<br>$\pm 0.038$ | 0.087<br>$\pm 0.053$ | 0.069<br>$\pm 0.042$ | 0.111<br>$\pm 0.054$        | 0.047<br>$\pm 0.029$  | 0.116<br>$\pm 0.046$        | 0.076<br>$\pm 0.044$        | 0.072<br>$\pm 0.032$ | 0.131<br>$\pm 0.042$        | 0.156<br>$\pm 0.066$        | 0.097<br>$\pm 0.066$  | 0.120<br>$\pm 0.048$         | 0.025<br>$\pm 0.020$         |
| Subject28 | $\kappa$ | 0.092<br>$\pm 0.064$        | 0.072<br>$\pm 0.053$        | 0.144<br>$\pm 0.047$        | 0.113<br>$\pm 0.056$ | 0.072<br>$\pm 0.033$ | 0.077<br>$\pm 0.048$ | 0.056<br>$\pm 0.033$ | 0.051<br>$\pm 0.018$        | 0.072<br>$\pm 0.042$  | 0.018<br>$\pm 0.035$        | 0.022<br>$\pm 0.035$        | 0.010<br>$\pm 0.023$ | 0.067<br>$\pm 0.064$        | <b>0.128</b><br>$\pm 0.031$ | 0.015<br>$\pm 0.023$  | 0.059<br>$\pm 0.044$         | 0.035<br>$\pm 0.019$         |
|           | AUC      | <b>0.771</b><br>$\pm 0.070$ | 0.754<br>$\pm 0.022$        | 0.739<br>$\pm 0.042$        | 0.784<br>$\pm 0.041$ | 0.687<br>$\pm 0.030$ | 0.603<br>$\pm 0.049$ | 0.700<br>$\pm 0.022$ | 0.678<br>$\pm 0.075$        | 0.629<br>$\pm 0.034$  | 0.602<br>$\pm 0.045$        | 0.545<br>$\pm 0.034$        | 0.586<br>$\pm 0.059$ | 0.725<br>$\pm 0.043$        | 0.699<br>$\pm 0.044$        | 0.527<br>$\pm 0.054$  | 0.621<br>$\pm 0.040$         | 0.633<br>$\pm 0.050$         |
|           | BAcc     | 0.115<br>$\pm 0.063$        | 0.095<br>$\pm 0.051$        | 0.165<br>$\pm 0.045$        | 0.135<br>$\pm 0.055$ | 0.095<br>$\pm 0.033$ | 0.100<br>$\pm 0.047$ | 0.080<br>$\pm 0.033$ | 0.075<br>$\pm 0.018$        | 0.095<br>$\pm 0.041$  | 0.043<br>$\pm 0.035$        | 0.047<br>$\pm 0.034$        | 0.035<br>$\pm 0.022$ | 0.090<br>$\pm 0.063$        | <b>0.150</b><br>$\pm 0.031$ | 0.040<br>$\pm 0.022$  | 0.082<br>$\pm 0.043$         | 0.059<br>$\pm 0.019$         |
|           | Acc.1    | 0.115<br>$\pm 0.063$        | 0.095<br>$\pm 0.051$        | 0.176<br>$\pm 0.049$        | 0.122<br>$\pm 0.063$ | 0.095<br>$\pm 0.033$ | 0.109<br>$\pm 0.080$ | 0.078<br>$\pm 0.062$ | 0.094<br>$\pm 0.067$        | 0.097<br>$\pm 0.057$  | 0.033<br>$\pm 0.029$        | 0.059<br>$\pm 0.042$        | 0.031<br>$\pm 0.029$ | 0.075<br>$\pm 0.060$        | <b>0.169</b><br>$\pm 0.026$ | 0.044<br>$\pm 0.034$  | 0.078<br>$\pm 0.045$         | 0.037<br>$\pm 0.012$         |
|           | Acc.2    | 0.210<br>$\pm 0.119$        | 0.160<br>$\pm 0.099$        | <b>0.234</b><br>$\pm 0.053$ | 0.203<br>$\pm 0.097$ | 0.155<br>$\pm 0.021$ | 0.153<br>$\pm 0.108$ | 0.206<br>$\pm 0.106$ | 0.175<br>$\pm 0.127$        | 0.125<br>$\pm 0.053$  | 0.060<br>$\pm 0.039$        | 0.076<br>$\pm 0.029$        | 0.069<br>$\pm 0.048$ | 0.194<br>$\pm 0.074$        | 0.234<br>$\pm 0.057$        | 0.091<br>$\pm 0.045$  | 0.158<br>$\pm 0.091$         | 0.062<br>$\pm 0.026$         |
| Subject29 | $\kappa$ | 0.000<br>$\pm 0.018$        | 0.031<br>$\pm 0.021$        | 0.026<br>$\pm 0.048$        | 0.022<br>$\pm 0.027$ | 0.031<br>$\pm 0.011$ | 0.026<br>$\pm 0.041$ | 0.015<br>$\pm 0.039$ | 0.026<br>$\pm 0.027$        | -0.003<br>$\pm 0.009$ | 0.067<br>$\pm 0.023$        | <b>0.051</b><br>$\pm 0.036$ | 0.015<br>$\pm 0.014$ | 0.013<br>$\pm 0.021$        | 0.046<br>$\pm 0.049$        | 0.005<br>$\pm 0.033$  | 0.015<br>$\pm 0.014$         | 0.015<br>$\pm 0.030$         |
|           | AUC      | 0.572<br>$\pm 0.014$        | 0.595<br>$\pm 0.035$        | 0.583<br>$\pm 0.043$        | 0.563<br>$\pm 0.034$ | 0.574<br>$\pm 0.048$ | 0.575<br>$\pm 0.030$ | 0.538<br>$\pm 0.059$ | 0.594<br>$\pm 0.041$        | 0.495<br>$\pm 0.073$  | 0.596<br>$\pm 0.047$        | 0.670<br>$\pm 0.039$        | 0.579<br>$\pm 0.026$ | <b>0.617</b><br>$\pm 0.056$ | 0.574<br>$\pm 0.035$        | 0.494<br>$\pm 0.057$  | 0.545<br>$\pm 0.025$         | 0.582<br>$\pm 0.031$         |
|           | BAcc     | 0.025<br>$\pm 0.018$        | 0.055<br>$\pm 0.021$        | 0.050<br>$\pm 0.047$        | 0.046<br>$\pm 0.027$ | 0.055<br>$\pm 0.011$ | 0.050<br>$\pm 0.040$ | 0.040<br>$\pm 0.038$ | 0.050<br>$\pm 0.027$        | 0.022<br>$\pm 0.009$  | 0.090<br>$\pm 0.022$        | <b>0.075</b><br>$\pm 0.035$ | 0.040<br>$\pm 0.014$ | 0.037<br>$\pm 0.021$        | 0.070<br>$\pm 0.048$        | 0.030<br>$\pm 0.033$  | 0.040<br>$\pm 0.014$         | 0.040<br>$\pm 0.029$         |
|           | Acc.1    | 0.025<br>$\pm 0.018$        | 0.055<br>$\pm 0.021$        | 0.050<br>$\pm 0.047$        | 0.049<br>$\pm 0.032$ | 0.055<br>$\pm 0.011$ | 0.087<br>$\pm 0.074$ | 0.034<br>$\pm 0.043$ | 0.049<br>$\pm 0.046$        | 0.014<br>$\pm 0.006$  | <b>0.084</b><br>$\pm 0.036$ | 0.066<br>$\pm 0.061$        | 0.053<br>$\pm 0.028$ | 0.062<br>$\pm 0.046$        | 0.072<br>$\pm 0.054$        | 0.028<br>$\pm 0.028$  | 0.062<br>$\pm 0.043$         | 0.044<br>$\pm 0.045$         |
|           | Acc.2    | 0.065<br>$\pm 0.029$        | 0.120<br>$\pm 0.065$        | 0.095<br>$\pm 0.065$        | 0.080<br>$\pm 0.029$ | 0.105<br>$\pm 0.067$ | 0.203<br>$\pm 0.046$ | 0.062<br>$\pm 0.049$ | 0.076<br>$\pm 0.039$        | 0.049<br>$\pm 0.052$  | 0.125<br>$\pm 0.058$        | 0.141<br>$\pm 0.077$        | 0.097<br>$\pm 0.055$ | 0.120<br>$\pm 0.031$        | <b>0.144</b><br>$\pm 0.050$ | 0.053<br>$\pm 0.045$  | 0.128<br>$\pm 0.056$         | 0.073<br>$\pm 0.059$         |
| Subject3  | $\kappa$ | 0.267<br>$\pm 0.257$        | 0.333<br>$\pm 0.089$        | 0.308<br>$\pm 0.044$        | 0.469<br>$\pm 0.044$ | 0.287<br>$\pm 0.084$ | 0.549<br>$\pm 0.113$ | 0.415<br>$\pm 0.071$ | 0.522<br>$\pm 0.080$        | 0.040<br>$\pm 0.037$  | 0.032<br>$\pm 0.023$        | 0.064<br>$\pm 0.019$        | 0.241<br>$\pm 0.047$ | 0.272<br>$\pm 0.047$        | <b>0.546</b><br>$\pm 0.075$ | 0.010<br>$\pm 0.014$  | 0.390<br>$\pm 0.069$         | 0.033<br>$\pm 0.041$         |

Continued on next page

| Subject   | Metric   | DeepConvnet                    | EEGNet          | Conformer       | CTNet                          | SSVEPDNN        | BIOT (f)        | BIOT (l)                       | BENDR (f)                      | BENDR (l)        | CBraMod (f)     | CBraMod (l)     | EEGPT (f)       | EEGPT (l)       | LaBraM (f)                     | LaBraM (l)       | STEEGformer-s (f) | STEEGformer-s (l) |
|-----------|----------|--------------------------------|-----------------|-----------------|--------------------------------|-----------------|-----------------|--------------------------------|--------------------------------|------------------|-----------------|-----------------|-----------------|-----------------|--------------------------------|------------------|-------------------|-------------------|
| Subject30 | AUC      | 0.831<br>±0.180                | 0.950<br>±0.030 | 0.923<br>±0.018 | 0.974<br>±0.008                | 0.914<br>±0.025 | 0.912<br>±0.040 | <b>0.969</b><br>± <b>0.016</b> | 0.952<br>±0.017                | 0.615<br>±0.036  | 0.641<br>±0.036 | 0.726<br>±0.027 | 0.850<br>±0.025 | 0.921<br>±0.031 | 0.949<br>±0.024                | 0.540<br>±0.033  | 0.875<br>±0.023   | 0.599<br>±0.050   |
|           |          | 0.285<br>±0.250                | 0.350<br>±0.087 | 0.325<br>±0.043 | 0.482<br>±0.043                | 0.305<br>±0.082 | 0.560<br>±0.110 | 0.430<br>±0.069                | 0.534<br>±0.078                | 0.064<br>±0.036  | 0.056<br>±0.022 | 0.088<br>±0.019 | 0.260<br>±0.045 | 0.290<br>±0.045 | <b>0.557</b><br>± <b>0.073</b> | 0.035<br>±0.014  | 0.405<br>±0.067   | 0.057<br>±0.040   |
|           | Acc.1    | 0.285<br>±0.250                | 0.350<br>±0.087 | 0.325<br>±0.043 | 0.541<br>±0.079                | 0.305<br>±0.082 | 0.556<br>±0.103 | 0.419<br>±0.102                | <b>0.574</b><br>± <b>0.077</b> | 0.045<br>±0.025  | 0.076<br>±0.040 | 0.102<br>±0.034 | 0.322<br>±0.039 | 0.341<br>±0.066 | 0.629<br>±0.060                | 0.022<br>±0.009  | 0.487<br>±0.074   | 0.076<br>±0.065   |
|           |          | 0.425<br>±0.375                | 0.570<br>±0.094 | 0.480<br>±0.065 | <b>0.765</b><br>± <b>0.102</b> | 0.515<br>±0.126 | 0.747<br>±0.089 | 0.759<br>±0.111                | 0.723<br>±0.071                | 0.087<br>±0.049  | 0.178<br>±0.043 | 0.172<br>±0.075 | 0.450<br>±0.034 | 0.534<br>±0.059 | 0.777<br>±0.040                | 0.034<br>±0.013  | 0.672<br>±0.085   | 0.118<br>±0.085   |
|           | $\kappa$ | 0.082<br>±0.058                | 0.103<br>±0.031 | 0.077<br>±0.063 | 0.133<br>±0.046                | 0.082<br>±0.061 | 0.179<br>±0.036 | 0.113<br>±0.056                | 0.118<br>±0.107                | 0.010<br>±0.029  | 0.031<br>±0.028 | 0.046<br>±0.033 | 0.067<br>±0.050 | 0.067<br>±0.050 | <b>0.169</b><br>± <b>0.039</b> | -0.010<br>±0.023 | 0.056<br>±0.033   | 0.015<br>±0.022   |
|           |          | 0.713<br>±0.057                | 0.750<br>±0.040 | 0.710<br>±0.031 | <b>0.782</b><br>± <b>0.045</b> | 0.686<br>±0.033 | 0.719<br>±0.057 | 0.787<br>±0.034                | 0.732<br>±0.045                | 0.556<br>±0.043  | 0.612<br>±0.043 | 0.699<br>±0.051 | 0.654<br>±0.060 | 0.757<br>±0.018 | 0.754<br>±0.038                | 0.526<br>±0.044  | 0.600<br>±0.065   | 0.575<br>±0.029   |
|           | BAcc     | 0.105<br>±0.057                | 0.125<br>±0.031 | 0.100<br>±0.061 | 0.155<br>±0.045                | 0.105<br>±0.060 | 0.200<br>±0.035 | 0.135<br>±0.055                | 0.140<br>±0.104                | 0.035<br>±0.029  | 0.055<br>±0.027 | 0.070<br>±0.033 | 0.090<br>±0.049 | 0.090<br>±0.049 | <b>0.190</b><br>± <b>0.038</b> | 0.015<br>±0.022  | 0.080<br>±0.033   | 0.040<br>±0.021   |
|           |          | 0.105<br>±0.057                | 0.125<br>±0.031 | 0.100<br>±0.061 | 0.155<br>±0.045                | 0.105<br>±0.060 | 0.247<br>±0.088 | 0.122<br>±0.037                | 0.134<br>±0.107                | 0.022<br>±0.018  | 0.072<br>±0.034 | 0.091<br>±0.064 | 0.094<br>±0.064 | 0.113<br>±0.086 | <b>0.212</b><br>± <b>0.045</b> | 0.019<br>±0.034  | 0.087<br>±0.049   | 0.044<br>±0.051   |
|           | Acc.2    | 0.190<br>±0.038                | 0.180<br>±0.021 | 0.205<br>±0.057 | 0.265<br>±0.014                | 0.185<br>±0.055 | 0.331<br>±0.079 | 0.234<br>±0.062                | 0.191<br>±0.106                | 0.075<br>±0.049  | 0.144<br>±0.043 | 0.150<br>±0.077 | 0.138<br>±0.082 | 0.209<br>±0.109 | <b>0.316</b><br>± <b>0.062</b> | 0.041<br>±0.028  | 0.125<br>±0.047   | 0.078<br>±0.068   |
| Subject31 | $\kappa$ | <b>0.133</b><br>± <b>0.122</b> | 0.118<br>±0.062 | 0.087<br>±0.059 | 0.149<br>±0.042                | 0.031<br>±0.042 | 0.036<br>±0.043 | 0.056<br>±0.033                | 0.092<br>±0.043                | -0.005<br>±0.011 | 0.033<br>±0.029 | 0.003<br>±0.009 | 0.051<br>±0.026 | 0.124<br>±0.057 | 0.123<br>±0.058                | -0.005<br>±0.011 | 0.073<br>±0.038   | 0.010<br>±0.019   |
|           |          | <b>0.775</b><br>± <b>0.072</b> | 0.762<br>±0.030 | 0.727<br>±0.051 | 0.804<br>±0.042                | 0.675<br>±0.048 | 0.606<br>±0.045 | 0.670<br>±0.066                | 0.689<br>±0.065                | 0.534<br>±0.015  | 0.590<br>±0.057 | 0.496<br>±0.030 | 0.669<br>±0.038 | 0.751<br>±0.053 | 0.720<br>±0.045                | 0.503<br>±0.063  | 0.634<br>±0.054   | 0.618<br>±0.059   |
|           | BAcc     | <b>0.155</b><br>± <b>0.119</b> | 0.140<br>±0.060 | 0.110<br>±0.058 | 0.170<br>±0.041                | 0.055<br>±0.041 | 0.060<br>±0.042 | 0.080<br>±0.033                | 0.115<br>±0.042                | 0.020<br>±0.011  | 0.057<br>±0.028 | 0.028<br>±0.009 | 0.075<br>±0.025 | 0.146<br>±0.056 | 0.145<br>±0.057                | 0.020<br>±0.011  | 0.096<br>±0.037   | 0.034<br>±0.019   |
|           |          | <b>0.155</b><br>± <b>0.119</b> | 0.140<br>±0.060 | 0.106<br>±0.055 | 0.191<br>±0.057                | 0.055<br>±0.041 | 0.066<br>±0.062 | 0.097<br>±0.051                | 0.109<br>±0.053                | 0.013<br>±0.007  | 0.062<br>±0.043 | 0.029<br>±0.026 | 0.084<br>±0.032 | 0.122<br>±0.064 | 0.147<br>±0.074                | 0.022<br>±0.024  | 0.122<br>±0.077   | 0.021<br>±0.012   |
|           | Acc.2    | <b>0.255</b><br>± <b>0.157</b> | 0.245<br>±0.060 | 0.166<br>±0.072 | 0.316<br>±0.106                | 0.110<br>±0.038 | 0.131<br>±0.091 | 0.134<br>±0.056                | 0.191<br>±0.026                | 0.034<br>±0.023  | 0.094<br>±0.044 | 0.057<br>±0.031 | 0.156<br>±0.047 | 0.198<br>±0.057 | 0.191<br>±0.095                | 0.047<br>±0.025  | 0.201<br>±0.144   | 0.043<br>±0.027   |
| Subject32 | AUC      | 0.169<br>±0.165                | 0.395<br>±0.139 | 0.328<br>±0.038 | 0.513<br>±0.051                | 0.251<br>±0.066 | 0.462<br>±0.079 | 0.395<br>±0.074                | 0.395<br>±0.090                | 0.021<br>±0.033  | 0.036<br>±0.056 | 0.067<br>±0.014 | 0.210<br>±0.073 | 0.297<br>±0.100 | <b>0.503</b><br>± <b>0.142</b> | 0.036<br>±0.014  | 0.293<br>±0.074   | 0.000<br>±0.026   |
|           |          | 0.830<br>±0.125                | 0.951<br>±0.025 | 0.905<br>±0.022 | 0.977<br>±0.003                | 0.903<br>±0.055 | 0.921<br>±0.029 | <b>0.964</b><br>± <b>0.005</b> | 0.923<br>±0.016                | 0.619<br>±0.026  | 0.610<br>±0.038 | 0.734<br>±0.063 | 0.803<br>±0.048 | 0.906<br>±0.018 | 0.931<br>±0.030                | 0.574<br>±0.037  | 0.816<br>±0.019   | 0.629<br>±0.056   |

Continued on next page

| Subject   | Metric   | DeepConvnet                    | EEGNet                         | Conformer       | CTNet                          | SSVEPDNN        | BIOT (f)        | BIOT (l)        | BENDR (f)                      | BENDR (l)        | CBraMod (f)     | CBraMod (l)     | EEGPT (f)       | EEGPT (l)                      | LaBraM (f)                     | LaBraM (l)       | STEEGformer-s (f) | STEEGformer-s (l) |
|-----------|----------|--------------------------------|--------------------------------|-----------------|--------------------------------|-----------------|-----------------|-----------------|--------------------------------|------------------|-----------------|-----------------|-----------------|--------------------------------|--------------------------------|------------------|-------------------|-------------------|
|           | BAcc     | 0.190<br>±0.161                | 0.410<br>±0.135                | 0.345<br>±0.037 | 0.525<br>±0.050                | 0.270<br>±0.065 | 0.475<br>±0.077 | 0.410<br>±0.072 | 0.410<br>±0.088                | 0.045<br>±0.033  | 0.060<br>±0.055 | 0.090<br>±0.014 | 0.230<br>±0.072 | 0.315<br>±0.098                | <b>0.515</b><br>± <b>0.139</b> | 0.060<br>±0.014  | 0.311<br>±0.072   | 0.025<br>±0.025   |
|           | Acc.1    | 0.190<br>±0.161                | 0.410<br>±0.135                | 0.384<br>±0.092 | <b>0.553</b><br>± <b>0.057</b> | 0.270<br>±0.065 | 0.541<br>±0.065 | 0.397<br>±0.089 | 0.481<br>±0.071                | 0.028<br>±0.020  | 0.066<br>±0.046 | 0.113<br>±0.046 | 0.275<br>±0.116 | 0.403<br>±0.145                | 0.566<br>±0.177                | 0.075<br>±0.017  | 0.402<br>±0.084   | 0.025<br>±0.026   |
|           | Acc.2    | 0.285<br>±0.208                | 0.595<br>±0.161                | 0.519<br>±0.068 | <b>0.741</b><br>± <b>0.075</b> | 0.395<br>±0.076 | 0.772<br>±0.057 | 0.625<br>±0.053 | 0.634<br>±0.085                | 0.044<br>±0.020  | 0.134<br>±0.041 | 0.225<br>±0.036 | 0.331<br>±0.115 | 0.559<br>±0.078                | 0.734<br>±0.127                | 0.106<br>±0.040  | 0.496<br>±0.052   | 0.050<br>±0.030   |
|           | $\kappa$ | 0.149<br>±0.137                | 0.333<br>±0.087                | 0.123<br>±0.084 | <b>0.267</b><br>± <b>0.043</b> | 0.169<br>±0.029 | 0.195<br>±0.050 | 0.159<br>±0.080 | 0.262<br>±0.071                | 0.015<br>±0.014  | 0.082<br>±0.046 | 0.026<br>±0.026 | 0.082<br>±0.028 | 0.138<br>±0.059                | 0.205<br>±0.060                | -0.000<br>±0.018 | 0.246<br>±0.067   | 0.010<br>±0.014   |
| Subject33 | AUC      | 0.783<br>±0.101                | <b>0.908</b><br>± <b>0.014</b> | 0.805<br>±0.035 | 0.923<br>±0.016                | 0.828<br>±0.038 | 0.751<br>±0.045 | 0.847<br>±0.037 | 0.842<br>±0.068                | 0.686<br>±0.038  | 0.632<br>±0.035 | 0.710<br>±0.048 | 0.668<br>±0.050 | 0.838<br>±0.027                | 0.819<br>±0.032                | 0.492<br>±0.008  | 0.765<br>±0.029   | 0.667<br>±0.046   |
|           | BAcc     | 0.170<br>±0.134                | 0.350<br>±0.085                | 0.145<br>±0.082 | <b>0.285</b><br>± <b>0.042</b> | 0.190<br>±0.029 | 0.215<br>±0.049 | 0.180<br>±0.078 | 0.280<br>±0.069                | 0.040<br>±0.014  | 0.105<br>±0.045 | 0.050<br>±0.025 | 0.105<br>±0.027 | 0.160<br>±0.058                | 0.225<br>±0.059                | 0.025<br>±0.018  | 0.265<br>±0.065   | 0.035<br>±0.014   |
|           | Acc.1    | 0.170<br>±0.134                | 0.350<br>±0.085                | 0.100<br>±0.070 | <b>0.291</b><br>± <b>0.076</b> | 0.190<br>±0.029 | 0.181<br>±0.059 | 0.169<br>±0.073 | 0.287<br>±0.062                | 0.034<br>±0.026  | 0.075<br>±0.047 | 0.059<br>±0.049 | 0.103<br>±0.048 | 0.138<br>±0.051                | 0.225<br>±0.063                | 0.025<br>±0.024  | 0.241<br>±0.065   | 0.022<br>±0.009   |
|           | Acc.2    | 0.260<br>±0.197                | 0.510<br>±0.088                | 0.188<br>±0.080 | <b>0.478</b><br>± <b>0.065</b> | 0.310<br>±0.022 | 0.319<br>±0.092 | 0.306<br>±0.061 | 0.372<br>±0.091                | 0.059<br>±0.042  | 0.138<br>±0.030 | 0.084<br>±0.059 | 0.147<br>±0.046 | 0.237<br>±0.104                | 0.334<br>±0.056                | 0.044<br>±0.034  | 0.331<br>±0.113   | 0.047<br>±0.011   |
| Subject34 | $\kappa$ | <b>0.138</b><br>± <b>0.047</b> | 0.103<br>±0.041                | 0.056<br>±0.033 | 0.128<br>±0.041                | 0.056<br>±0.046 | 0.056<br>±0.038 | 0.072<br>±0.038 | 0.169<br>±0.086                | -0.005<br>±0.021 | 0.031<br>±0.021 | 0.026<br>±0.031 | 0.107<br>±0.055 | 0.118<br>±0.043                | 0.123<br>±0.049                | 0.026<br>±0.018  | 0.108<br>±0.071   | 0.000<br>±0.018   |
|           | AUC      | 0.784<br>±0.068                | 0.779<br>±0.054                | 0.693<br>±0.017 | 0.800<br>±0.026                | 0.734<br>±0.030 | 0.598<br>±0.029 | 0.688<br>±0.034 | <b>0.801</b><br>± <b>0.030</b> | 0.606<br>±0.027  | 0.572<br>±0.037 | 0.616<br>±0.029 | 0.690<br>±0.059 | 0.801<br>±0.039                | 0.731<br>±0.037                | 0.507<br>±0.042  | 0.674<br>±0.053   | 0.566<br>±0.050   |
|           | BAcc     | <b>0.160</b><br>± <b>0.045</b> | 0.125<br>±0.040                | 0.080<br>±0.033 | 0.150<br>±0.040                | 0.080<br>±0.045 | 0.080<br>±0.037 | 0.095<br>±0.037 | 0.190<br>±0.084                | 0.020<br>±0.021  | 0.055<br>±0.021 | 0.050<br>±0.031 | 0.129<br>±0.053 | 0.140<br>±0.042                | 0.145<br>±0.048                | 0.050<br>±0.018  | 0.130<br>±0.069   | 0.025<br>±0.018   |
|           | Acc.1    | <b>0.160</b><br>± <b>0.045</b> | 0.125<br>±0.040                | 0.080<br>±0.033 | 0.113<br>±0.036                | 0.080<br>±0.045 | 0.106<br>±0.075 | 0.116<br>±0.042 | 0.184<br>±0.088                | 0.022<br>±0.026  | 0.062<br>±0.053 | 0.059<br>±0.042 | 0.151<br>±0.056 | 0.116<br>±0.060                | 0.156<br>±0.037                | 0.031<br>±0.011  | 0.109<br>±0.058   | 0.016<br>±0.011   |
| Subject35 | Acc.2    | 0.240<br>±0.072                | 0.190<br>±0.042                | 0.165<br>±0.072 | 0.191<br>±0.070                | 0.145<br>±0.069 | 0.169<br>±0.097 | 0.181<br>±0.053 | 0.281<br>±0.125                | 0.078<br>±0.040  | 0.109<br>±0.080 | 0.144<br>±0.088 | 0.211<br>±0.088 | 0.203<br>±0.088                | <b>0.256</b><br>± <b>0.095</b> | 0.041<br>±0.018  | 0.191<br>±0.040   | 0.034<br>±0.017   |
|           | $\kappa$ | 0.144<br>±0.053                | <b>0.174</b><br>± <b>0.073</b> | 0.113<br>±0.023 | 0.200<br>±0.028                | 0.149<br>±0.073 | 0.128<br>±0.018 | 0.113<br>±0.029 | 0.149<br>±0.064                | 0.067<br>±0.043  | 0.067<br>±0.029 | 0.005<br>±0.021 | 0.073<br>±0.052 | 0.133<br>±0.021                | 0.128<br>±0.026                | 0.000<br>±0.026  | 0.092<br>±0.039   | 0.015<br>±0.029   |
|           | AUC      | 0.823<br>±0.025                | 0.823<br>±0.037                | 0.802<br>±0.019 | 0.846<br>±0.029                | 0.824<br>±0.039 | 0.682<br>±0.025 | 0.783<br>±0.034 | 0.782<br>±0.020                | 0.711<br>±0.019  | 0.606<br>±0.050 | 0.724<br>±0.047 | 0.633<br>±0.083 | <b>0.828</b><br>± <b>0.018</b> | 0.684<br>±0.074                | 0.500<br>±0.077  | 0.700<br>±0.030   | 0.579<br>±0.042   |
|           | BAcc     | 0.165<br>±0.052                | <b>0.195</b><br>± <b>0.072</b> | 0.135<br>±0.022 | 0.220<br>±0.027                | 0.170<br>±0.072 | 0.150<br>±0.018 | 0.135<br>±0.029 | 0.170<br>±0.062                | 0.090<br>±0.042  | 0.090<br>±0.029 | 0.030<br>±0.021 | 0.096<br>±0.051 | 0.155<br>±0.021                | 0.150<br>±0.025                | 0.025<br>±0.025  | 0.115<br>±0.038   | 0.040<br>±0.029   |

Continued on next page

| Subject  | Metric   | DeepConvNet    | EEGNet         | Conformer | CTNet          | SSVEPDNN       | BIOT (f)       | BIOT (l)       | BENDR (f)    | BENDR (l) | CBraMod (f) | CBraMod (l) | EEGPT (f) | EEGPT (l) | LaBraM (f)     | LaBraM (l)     | STEEGformers (f) | STEEGformers (l) |        |
|----------|----------|----------------|----------------|-----------|----------------|----------------|----------------|----------------|--------------|-----------|-------------|-------------|-----------|-----------|----------------|----------------|------------------|------------------|--------|
| Subject1 | Acc.1    | 0.165          | 0.195          | 0.150     | 0.184          | 0.170          | 0.159          | 0.122          | <b>0.212</b> | 0.122     | 0.141       | 0.075       | 0.138     | 0.237     | 0.206          | 0.016          | 0.166            | 0.025            |        |
|          |          | ±0.052         | ±0.072         | ±0.068    | ±0.017         | ±0.072         | ±0.069         | ±0.049         | ±0.070       | ±0.040    | ±0.037      | ±0.052      | ±0.079    | ±0.040    | ±0.036         | ±0.016         | ±0.109           | ±0.018           |        |
|          | Acc.2    | 0.265          | 0.265          | 0.231     | 0.328          | 0.280          | 0.259          | 0.275          | 0.322        | 0.219     | 0.191       | 0.138       | 0.167     | 0.344     | <b>0.331</b>   | 0.031          | 0.234            | 0.094            |        |
|          |          | ±0.114         | ±0.072         | ±0.053    | ±0.049         | ±0.096         | ±0.080         | ±0.097         | ±0.104       | ±0.040    | ±0.058      | ±0.040      | ±0.067    | ±0.016    | ±0.070         | ±0.029         | ±0.110           | ±0.019           |        |
|          | Subject4 | κ              | <b>0.118</b>   | 0.111     | 0.092          | <b>0.118</b>   | 0.056          | 0.138          | 0.103        | 0.062     | -0.005      | 0.010       | 0.051     | 0.051     | 0.077          | 0.108          | 0.005            | 0.072            | -0.005 |
|          |          |                | ± <b>0.084</b> | ±0.066    | ±0.047         | ± <b>0.050</b> | ±0.056         | ±0.050         | ±0.054       | ±0.053    | ±0.021      | ±0.029      | ±0.051    | ±0.036    | ±0.055         | ±0.038         | ±0.033           | ±0.033           | ±0.021 |
| AUC      |          | 0.733          | 0.700          | 0.681     | <b>0.778</b>   | 0.636          | 0.703          | 0.800          | 0.651        | 0.502     | 0.542       | 0.649       | 0.642     | 0.716     | 0.687          | 0.517          | 0.594            | 0.527            |        |
|          |          | ±0.034         | ±0.051         | ±0.057    | ± <b>0.027</b> | ±0.042         | ±0.057         | ±0.047         | ±0.049       | ±0.023    | ±0.037      | ±0.008      | ±0.095    | ±0.053    | ±0.028         | ±0.038         | ±0.024           | ±0.026           |        |
| BAcc     |          | <b>0.140</b>   | 0.133          | 0.115     | <b>0.140</b>   | 0.080          | 0.160          | 0.125          | 0.085        | 0.020     | 0.035       | 0.075       | 0.075     | 0.100     | 0.130          | 0.030          | 0.095            | 0.020            |        |
|          |          | ± <b>0.082</b> | ±0.065         | ±0.045    | ± <b>0.049</b> | ±0.054         | ±0.049         | ±0.053         | ±0.052       | ±0.021    | ±0.029      | ±0.050      | ±0.035    | ±0.054    | ±0.037         | ±0.033         | ±0.033           | ±0.033           | ±0.021 |
| Subject5 | Acc.1    | 0.140          | 0.118          | 0.100     | 0.116          | 0.080          | 0.166          | 0.125          | 0.091        | 0.022     | 0.031       | 0.075       | 0.113     | 0.086     | <b>0.147</b>   | 0.047          | 0.106            | 0.022            |        |
|          |          | ±0.082         | ±0.066         | ±0.051    | ±0.068         | ±0.054         | ±0.093         | ±0.098         | ±0.049       | ±0.026    | ±0.037      | ±0.073      | ±0.064    | ±0.053    | ± <b>0.083</b> | ±0.062         | ±0.061           | ±0.032           |        |
|          | Acc.2    | 0.195          | 0.170          | 0.159     | 0.231          | 0.145          | 0.269          | 0.244          | 0.163        | 0.044     | 0.062       | 0.103       | 0.169     | 0.188     | <b>0.247</b>   | 0.056          | 0.156            | 0.066            |        |
|          |          | ±0.082         | ±0.089         | ±0.096    | ±0.069         | ±0.086         | ±0.095         | ±0.134         | ±0.071       | ±0.030    | ±0.088      | ±0.053      | ±0.098    | ±0.098    | ± <b>0.072</b> | ±0.059         | ±0.071           | ±0.039           |        |
|          | Subject6 | κ              | 0.400          | 0.395     | 0.405          | 0.600          | 0.338          | 0.549          | 0.533        | 0.553     | 0.035       | 0.082       | 0.056     | 0.328     | 0.390          | <b>0.569</b>   | 0.036            | 0.441            | 0.031  |
|          |          |                | ±0.227         | ±0.059    | ±0.061         | ±0.053         | ±0.114         | ±0.034         | ±0.071       | ±0.056    | ±0.033      | ±0.069      | ±0.061    | ±0.042    | ±0.069         | ± <b>0.073</b> | ±0.029           | ±0.061           | ±0.028 |
| AUC      |          | 0.914          | 0.959          | 0.945     | 0.984          | 0.937          | 0.946          | <b>0.976</b>   | 0.967        | 0.658     | 0.682       | 0.745       | 0.873     | 0.961     | 0.965          | 0.576          | 0.879            | 0.628            |        |
|          |          | ±0.123         | ±0.016         | ±0.010    | ±0.002         | ±0.028         | ±0.014         | ± <b>0.012</b> | ±0.017       | ±0.020    | ±0.017      | ±0.037      | ±0.025    | ±0.013    | ±0.009         | ±0.041         | ±0.028           | ±0.053           |        |
| BAcc     |          | 0.415          | 0.410          | 0.420     | 0.610          | 0.355          | 0.560          | 0.545          | 0.564        | 0.059     | 0.105       | 0.080       | 0.345     | 0.405     | <b>0.580</b>   | 0.060          | 0.455            | 0.055            |        |
|          |          | ±0.221         | ±0.058         | ±0.060    | ±0.052         | ±0.111         | ±0.034         | ±0.069         | ±0.055       | ±0.033    | ±0.067      | ±0.060      | ±0.041    | ±0.067    | ± <b>0.072</b> | ±0.029         | ±0.060           | ±0.027           |        |
| Subject7 | Acc.1    | 0.415          | 0.410          | 0.420     | 0.610          | 0.355          | <b>0.622</b>   | 0.603          | 0.550        | 0.043     | 0.113       | 0.125       | 0.375     | 0.459     | 0.634          | 0.056          | 0.481            | 0.053            |        |
|          |          | ±0.221         | ±0.058         | ±0.060    | ±0.052         | ±0.111         | ± <b>0.046</b> | ±0.120         | ±0.094       | ±0.032    | ±0.066      | ±0.103      | ±0.051    | ±0.121    | ±0.095         | ±0.057         | ±0.068           | ±0.058           |        |
|          | Acc.2    | 0.650          | 0.630          | 0.605     | 0.835          | 0.535          | <b>0.834</b>   | 0.825          | 0.740        | 0.086     | 0.206       | 0.178       | 0.478     | 0.669     | 0.778          | 0.075          | 0.631            | 0.141            |        |
|          |          | ±0.287         | ±0.102         | ±0.084    | ±0.022         | ±0.142         | ± <b>0.057</b> | ±0.072         | ±0.123       | ±0.030    | ±0.017      | ±0.101      | ±0.063    | ±0.069    | ±0.069         | ±0.049         | ±0.093           | ±0.031           |        |
|          | Subject8 | κ              | <b>0.231</b>   | 0.215     | 0.123          | 0.262          | 0.092          | 0.195          | 0.179        | 0.195     | -0.005      | 0.046       | 0.048     | 0.159     | 0.174          | <b>0.231</b>   | 0.026            | 0.172            | 0.004  |
|          |          |                | ± <b>0.073</b> | ±0.034    | ±0.046         | ±0.064         | ±0.086         | ±0.059         | ±0.054       | ±0.059    | ±0.021      | ±0.033      | ±0.043    | ±0.078    | ±0.069         | ± <b>0.101</b> | ±0.041           | ±0.055           | ±0.023 |
| AUC      |          | <b>0.914</b>   | 0.870          | 0.807     | 0.942          | 0.729          | 0.770          | 0.888          | 0.809        | 0.549     | 0.605       | 0.689       | 0.726     | 0.824     | 0.762          | 0.530          | 0.724            | 0.655            |        |
|          |          | ± <b>0.023</b> | ±0.042         | ±0.033    | ±0.011         | ±0.130         | ±0.025         | ±0.020         | ±0.022       | ±0.025    | ±0.033      | ±0.041      | ±0.050    | ±0.029    | ±0.054         | ±0.028         | ±0.036           | ±0.023           |        |
| BAcc     |          | <b>0.250</b>   | 0.235          | 0.145     | 0.280          | 0.115          | 0.215          | 0.200          | 0.215        | 0.020     | 0.070       | 0.072       | 0.180     | 0.195     | <b>0.250</b>   | 0.050          | 0.193            | 0.029            |        |
|          |          | ± <b>0.071</b> | ±0.034         | ±0.045    | ±0.062         | ±0.084         | ±0.058         | ±0.053         | ±0.058       | ±0.021    | ±0.033      | ±0.042      | ±0.076    | ±0.067    | ± <b>0.098</b> | ±0.040         | ±0.054           | ±0.022           |        |
| Subject9 | Acc.1    | 0.250          | 0.235          | 0.145     | 0.280          | 0.115          | 0.256          | 0.219          | 0.191        | 0.022     | 0.091       | 0.094       | 0.206     | 0.197     | <b>0.269</b>   | 0.031          | 0.167            | 0.018            |        |
|          |          | ±0.071         | ±0.034         | ±0.045    | ±0.062         | ±0.084         | ±0.085         | ±0.096         | ±0.043       | ±0.026    | ±0.051      | ±0.048      | ±0.064    | ±0.070    | ± <b>0.090</b> | ±0.025         | ±0.042           | ±0.014           |        |
|          | Acc.2    | 0.250          | 0.235          | 0.145     | 0.280          | 0.115          | 0.256          | 0.219          | 0.191        | 0.022     | 0.091       | 0.094       | 0.206     | 0.197     | <b>0.269</b>   | 0.031          | 0.167            | 0.018            |        |
|          |          | ±0.071         | ±0.034         | ±0.045    | ±0.062         | ±0.084         | ±0.085         | ±0.096         | ±0.043       | ±0.026    | ±0.051      | ±0.048      | ±0.064    | ±0.070    | ± <b>0.090</b> | ±0.025         | ±0.042           | ±0.014           |        |

Continued on next page

Continued on next page



| Subject  | Metric   | DeepConvnet                    | EEGNet                         | Conformer        | CTNet                          | SSVEPDNN         | BIOT (f)                       | BIOT (l)                       | BENDR (f)                      | BENDR (l)        | CBraMod (f)      | CBraMod (l)      | EEGPT (f)        | EEGPT (l)        | LaBraM (f)                     | LaBraM (l)       | STEEGformer-s (f)              | STEEGformer-s (l) |
|----------|----------|--------------------------------|--------------------------------|------------------|--------------------------------|------------------|--------------------------------|--------------------------------|--------------------------------|------------------|------------------|------------------|------------------|------------------|--------------------------------|------------------|--------------------------------|-------------------|
| Subject7 | Acc.2    | 0.480<br>± 0.065               | 0.375<br>± 0.018               | 0.255<br>± 0.105 | 0.480<br>± 0.065               | 0.215<br>± 0.119 | 0.384<br>± 0.057               | <b>0.428</b><br>± <b>0.094</b> | 0.381<br>± 0.034               | 0.062<br>± 0.022 | 0.131<br>± 0.042 | 0.144<br>± 0.039 | 0.241<br>± 0.055 | 0.356<br>± 0.143 | 0.362<br>± 0.092               | 0.044<br>± 0.037 | 0.242<br>± 0.116               | 0.047<br>± 0.018  |
|          | $\kappa$ | 0.128<br>± 0.152               | <b>0.222</b><br>± <b>0.062</b> | 0.169<br>± 0.053 | 0.267<br>± 0.086               | 0.144<br>± 0.047 | 0.221<br>± 0.088               | 0.210<br>± 0.061               | 0.205<br>± 0.041               | 0.005<br>± 0.021 | 0.058<br>± 0.045 | 0.051<br>± 0.031 | 0.087<br>± 0.050 | 0.170<br>± 0.041 | 0.221<br>± 0.074               | 0.041<br>± 0.023 | 0.138<br>± 0.053               | -0.005<br>± 0.011 |
|          | AUC      | 0.793<br>± 0.111               | 0.866<br>± 0.045               | 0.845<br>± 0.039 | 0.915<br>± 0.039               | 0.798<br>± 0.019 | 0.734<br>± 0.051               | <b>0.875</b><br>± <b>0.018</b> | 0.805<br>± 0.049               | 0.565<br>± 0.039 | 0.638<br>± 0.071 | 0.675<br>± 0.053 | 0.667<br>± 0.062 | 0.834<br>± 0.027 | 0.792<br>± 0.039               | 0.592<br>± 0.054 | 0.693<br>± 0.046               | 0.633<br>± 0.036  |
|          | BAcc     | 0.150<br>± 0.148               | <b>0.242</b><br>± <b>0.061</b> | 0.190<br>± 0.052 | 0.285<br>± 0.084               | 0.165<br>± 0.045 | 0.240<br>± 0.086               | 0.230<br>± 0.060               | 0.225<br>± 0.040               | 0.030<br>± 0.021 | 0.081<br>± 0.044 | 0.075<br>± 0.031 | 0.110<br>± 0.049 | 0.191<br>± 0.040 | 0.240<br>± 0.072               | 0.065<br>± 0.022 | 0.160<br>± 0.052               | 0.020<br>± 0.011  |
|          | Acc.1    | 0.150<br>± 0.148               | 0.243<br>± 0.060               | 0.190<br>± 0.052 | 0.300<br>± 0.103               | 0.165<br>± 0.045 | <b>0.281</b><br>± <b>0.143</b> | 0.256<br>± 0.077               | 0.225<br>± 0.054               | 0.019<br>± 0.013 | 0.080<br>± 0.065 | 0.094<br>± 0.051 | 0.106<br>± 0.064 | 0.230<br>± 0.043 | 0.253<br>± 0.077               | 0.069<br>± 0.036 | 0.156<br>± 0.080               | 0.013<br>± 0.007  |
|          | Acc.2    | 0.235<br>± 0.219               | 0.373<br>± 0.053               | 0.330<br>± 0.082 | 0.491<br>± 0.171               | 0.240<br>± 0.029 | 0.375<br>± 0.078               | <b>0.444</b><br>± <b>0.061</b> | 0.353<br>± 0.094               | 0.044<br>± 0.020 | 0.146<br>± 0.074 | 0.134<br>± 0.056 | 0.184<br>± 0.058 | 0.328<br>± 0.036 | 0.378<br>± 0.055               | 0.116<br>± 0.059 | 0.228<br>± 0.067               | 0.037<br>± 0.026  |
|          | $\kappa$ | 0.205<br>± 0.085               | 0.231<br>± 0.068               | 0.113<br>± 0.039 | 0.285<br>± 0.097               | 0.128<br>± 0.119 | 0.144<br>± 0.047               | 0.256<br>± 0.079               | <b>0.285</b><br>± <b>0.091</b> | 0.000<br>± 0.027 | 0.048<br>± 0.040 | 0.028<br>± 0.068 | 0.094<br>± 0.039 | 0.149<br>± 0.046 | 0.295<br>± 0.066               | 0.021<br>± 0.021 | 0.174<br>± 0.028               | -0.005<br>± 0.033 |
| Subject8 | AUC      | 0.862<br>± 0.032               | <b>0.877</b><br>± <b>0.030</b> | 0.783<br>± 0.021 | 0.906<br>± 0.012               | 0.732<br>± 0.135 | 0.715<br>± 0.048               | 0.867<br>± 0.022               | 0.868<br>± 0.042               | 0.565<br>± 0.038 | 0.576<br>± 0.057 | 0.635<br>± 0.058 | 0.731<br>± 0.031 | 0.836<br>± 0.036 | 0.802<br>± 0.023               | 0.534<br>± 0.043 | 0.782<br>± 0.024               | 0.602<br>± 0.043  |
|          | BAcc     | 0.225<br>± 0.083               | 0.250<br>± 0.066               | 0.135<br>± 0.038 | <b>0.303</b><br>± <b>0.095</b> | 0.150<br>± 0.116 | 0.165<br>± 0.045               | 0.275<br>± 0.077               | <b>0.303</b><br>± <b>0.089</b> | 0.025<br>± 0.027 | 0.072<br>± 0.039 | 0.053<br>± 0.067 | 0.117<br>± 0.038 | 0.170<br>± 0.045 | 0.312<br>± 0.064               | 0.045<br>± 0.021 | 0.195<br>± 0.027               | 0.020<br>± 0.033  |
|          | Acc.1    | 0.225<br>± 0.083               | 0.250<br>± 0.066               | 0.135<br>± 0.038 | 0.348<br>± 0.078               | 0.150<br>± 0.116 | 0.225<br>± 0.055               | 0.275<br>± 0.109               | 0.295<br>± 0.088               | 0.039<br>± 0.049 | 0.068<br>± 0.036 | 0.075<br>± 0.090 | 0.159<br>± 0.059 | 0.209<br>± 0.059 | <b>0.336</b><br>± <b>0.097</b> | 0.037<br>± 0.032 | 0.309<br>± 0.066               | 0.013<br>± 0.020  |
|          | Acc.2    | 0.410<br>± 0.104               | 0.400<br>± 0.095               | 0.280<br>± 0.089 | 0.574<br>± 0.071               | 0.210<br>± 0.141 | 0.378<br>± 0.057               | 0.447<br>± 0.059               | 0.477<br>± 0.121               | 0.076<br>± 0.058 | 0.115<br>± 0.077 | 0.108<br>± 0.088 | 0.271<br>± 0.088 | 0.328<br>± 0.046 | 0.486<br>± 0.091               | 0.056<br>± 0.036 | <b>0.497</b><br>± <b>0.120</b> | 0.056<br>± 0.065  |
|          | $\kappa$ | 0.323<br>± 0.108               | 0.251<br>± 0.033               | 0.169<br>± 0.086 | <b>0.303</b><br>± <b>0.054</b> | 0.210<br>± 0.106 | 0.221<br>± 0.056               | 0.195<br>± 0.039               | 0.292<br>± 0.055               | 0.016<br>± 0.023 | 0.064<br>± 0.031 | 0.005<br>± 0.021 | 0.082<br>± 0.066 | 0.190<br>± 0.082 | 0.234<br>± 0.048               | 0.010<br>± 0.029 | 0.205<br>± 0.036               | 0.006<br>± 0.012  |
|          | AUC      | <b>0.916</b><br>± <b>0.016</b> | 0.900<br>± 0.022               | 0.854<br>± 0.015 | 0.922<br>± 0.010               | 0.867<br>± 0.046 | 0.762<br>± 0.026               | 0.863<br>± 0.025               | 0.860<br>± 0.027               | 0.677<br>± 0.045 | 0.645<br>± 0.049 | 0.549<br>± 0.025 | 0.663<br>± 0.067 | 0.868<br>± 0.012 | 0.817<br>± 0.042               | 0.521<br>± 0.046 | 0.754<br>± 0.018               | 0.608<br>± 0.034  |
| Subject9 | BAcc     | 0.340<br>± 0.105               | 0.270<br>± 0.033               | 0.190<br>± 0.084 | <b>0.320</b><br>± <b>0.052</b> | 0.230<br>± 0.104 | 0.240<br>± 0.055               | 0.215<br>± 0.038               | 0.309<br>± 0.053               | 0.041<br>± 0.023 | 0.087<br>± 0.030 | 0.030<br>± 0.021 | 0.105<br>± 0.065 | 0.210<br>± 0.080 | 0.253<br>± 0.047               | 0.035<br>± 0.029 | 0.225<br>± 0.035               | 0.031<br>± 0.012  |
|          | Acc.1    | <b>0.340</b><br>± <b>0.105</b> | 0.270<br>± 0.033               | 0.190<br>± 0.084 | 0.378<br>± 0.054               | 0.230<br>± 0.104 | 0.281<br>± 0.057               | 0.209<br>± 0.053               | 0.311<br>± 0.090               | 0.049<br>± 0.034 | 0.107<br>± 0.042 | 0.028<br>± 0.023 | 0.131<br>± 0.101 | 0.216<br>± 0.062 | 0.293<br>± 0.085               | 0.059<br>± 0.052 | 0.244<br>± 0.041               | 0.020<br>± 0.007  |
|          | Acc.2    | <b>0.465</b><br>± <b>0.105</b> | 0.450<br>± 0.077               | 0.295<br>± 0.112 | 0.552<br>± 0.038               | 0.360<br>± 0.105 | 0.375<br>± 0.022               | 0.400<br>± 0.064               | 0.449<br>± 0.097               | 0.090<br>± 0.035 | 0.203<br>± 0.080 | 0.056<br>± 0.026 | 0.188<br>± 0.091 | 0.388<br>± 0.128 | 0.455<br>± 0.092               | 0.081<br>± 0.051 | 0.356<br>± 0.065               | 0.057<br>± 0.025  |

## Leave-One-Out Fine-Tuning Results

Table 65: Average Leave-One-Out Fine-Tuned Performance Across All Subjects.

| Model (Training strategy) | $\kappa$     | AUC          | BAcc         | Acc.1        | Acc.2        |
|---------------------------|--------------|--------------|--------------|--------------|--------------|
|                           | 0.283        | <b>0.852</b> | 0.301        | 0.301        | 0.423        |
| <b>DeepConvnet</b>        | $\pm 0.153$  | $\pm 0.085$  | $\pm 0.150$  | $\pm 0.150$  | $\pm 0.183$  |
|                           | 0.230        | 0.830        | 0.250        | 0.250        | 0.378        |
| <b>EEGNet</b>             | $\pm 0.142$  | $\pm 0.101$  | $\pm 0.138$  | $\pm 0.138$  | $\pm 0.180$  |
|                           | 0.241        | 0.817        | 0.260        | 0.258        | 0.380        |
| <b>Conformer</b>          | $\pm 0.165$  | $\pm 0.115$  | $\pm 0.161$  | $\pm 0.160$  | $\pm 0.199$  |
|                           | 0.315        | 0.866        | 0.332        | <b>0.341</b> | 0.477        |
| <b>CTNet</b>              | $\pm 0.189$  | $\pm 0.096$  | $\pm 0.184$  | $\pm 0.183$  | $\pm 0.216$  |
|                           | 0.198        | 0.779        | 0.218        | 0.218        | 0.323        |
| <b>SSVEPDNN</b>           | $\pm 0.143$  | $\pm 0.107$  | $\pm 0.140$  | $\pm 0.140$  | $\pm 0.176$  |
|                           | 0.283        | 0.796        | 0.301        | 0.326        | 0.442        |
| <b>BIOT (f)</b>           | $\pm 0.193$  | $\pm 0.116$  | $\pm 0.188$  | $\pm 0.192$  | $\pm 0.231$  |
|                           | 0.175        | 0.768        | 0.196        | 0.206        | 0.322        |
| <b>BIOT (l)</b>           | $\pm 0.134$  | $\pm 0.116$  | $\pm 0.131$  | $\pm 0.137$  | $\pm 0.182$  |
|                           | 0.305        | 0.829        | 0.322        | 0.325        | 0.452        |
| <b>BENDR (f)</b>          | $\pm 0.201$  | $\pm 0.124$  | $\pm 0.196$  | $\pm 0.193$  | $\pm 0.232$  |
|                           | 0.014        | 0.552        | 0.038        | 0.038        | 0.070        |
| <b>BENDR (l)</b>          | $\pm 0.017$  | $\pm 0.044$  | $\pm 0.017$  | $\pm 0.018$  | $\pm 0.024$  |
|                           | 0.073        | 0.673        | 0.096        | 0.101        | 0.183        |
| <b>CBraMod (f)</b>        | $\pm 0.034$  | $\pm 0.048$  | $\pm 0.033$  | $\pm 0.039$  | $\pm 0.060$  |
|                           | 0.028        | 0.615        | 0.052        | 0.062        | 0.110        |
| <b>CBraMod (l)</b>        | $\pm 0.021$  | $\pm 0.053$  | $\pm 0.021$  | $\pm 0.033$  | $\pm 0.049$  |
|                           | 0.111        | 0.704        | 0.133        | 0.151        | 0.220        |
| <b>EEGPT (f)</b>          | $\pm 0.105$  | $\pm 0.090$  | $\pm 0.102$  | $\pm 0.118$  | $\pm 0.141$  |
|                           | 0.170        | 0.779        | 0.191        | 0.199        | 0.295        |
| <b>EEGPT (l)</b>          | $\pm 0.127$  | $\pm 0.099$  | $\pm 0.124$  | $\pm 0.139$  | $\pm 0.176$  |
|                           | <b>0.313</b> | 0.821        | <b>0.330</b> | 0.358        | <b>0.474</b> |
| <b>LaBraM (f)</b>         | $\pm 0.181$  | $\pm 0.097$  | $\pm 0.176$  | $\pm 0.182$  | $\pm 0.201$  |
|                           | 0.014        | 0.552        | 0.039        | 0.040        | 0.078        |
| <b>LaBraM (l)</b>         | $\pm 0.018$  | $\pm 0.038$  | $\pm 0.017$  | $\pm 0.019$  | $\pm 0.024$  |
|                           | 0.307        | 0.799        | 0.325        | 0.341        | 0.464        |
| <b>STEEGformer-s (f)</b>  | $\pm 0.171$  | $\pm 0.109$  | $\pm 0.166$  | $\pm 0.172$  | $\pm 0.204$  |
|                           | 0.020        | 0.607        | 0.045        | 0.042        | 0.080        |
| <b>STEEGformer-s (l)</b>  | $\pm 0.017$  | $\pm 0.047$  | $\pm 0.017$  | $\pm 0.021$  | $\pm 0.031$  |

Table 66: Per-Subject Leave-One-Out Fine-Tuned Performance.

| Subject   | Metric   | DeepConvnet                 | EEGNet                      | Conformer            | CTNet                       | SSVEPDNN             | BIOT (f)             | BIOT (l)             | BENDR (f)            | BENDR (l)             | CBraMod (f)          | CBraMod (l)          | EEGPT (f)             | EEGPT (l)            | LaBraM (f)                  | LaBraM (l)            | STEEGformer-s (f)           | STEEGformer-s (l)     |
|-----------|----------|-----------------------------|-----------------------------|----------------------|-----------------------------|----------------------|----------------------|----------------------|----------------------|-----------------------|----------------------|----------------------|-----------------------|----------------------|-----------------------------|-----------------------|-----------------------------|-----------------------|
| Subject1  | $\kappa$ | 0.251<br>$\pm 0.168$        | 0.149<br>$\pm 0.080$        | 0.200<br>$\pm 0.078$ | 0.241<br>$\pm 0.064$        | 0.236<br>$\pm 0.049$ | 0.179<br>$\pm 0.079$ | 0.087<br>$\pm 0.029$ | 0.176<br>$\pm 0.074$ | 0.003<br>$\pm 0.016$  | 0.062<br>$\pm 0.029$ | 0.021<br>$\pm 0.021$ | 0.026<br>$\pm 0.044$  | 0.077<br>$\pm 0.031$ | 0.277<br>$\pm 0.119$        | 0.000<br>$\pm 0.026$  | <b>0.251</b><br>$\pm 0.091$ | 0.015<br>$\pm 0.014$  |
|           | AUC      | <b>0.845</b><br>$\pm 0.104$ | 0.803<br>$\pm 0.048$        | 0.795<br>$\pm 0.028$ | 0.884<br>$\pm 0.020$        | 0.814<br>$\pm 0.033$ | 0.752<br>$\pm 0.050$ | 0.717<br>$\pm 0.039$ | 0.804<br>$\pm 0.045$ | 0.522<br>$\pm 0.021$  | 0.622<br>$\pm 0.044$ | 0.610<br>$\pm 0.023$ | 0.621<br>$\pm 0.041$  | 0.683<br>$\pm 0.059$ | 0.836<br>$\pm 0.036$        | 0.535<br>$\pm 0.052$  | 0.804<br>$\pm 0.029$        | 0.564<br>$\pm 0.047$  |
|           | BAcc     | <b>0.270</b><br>$\pm 0.163$ | 0.170<br>$\pm 0.078$        | 0.220<br>$\pm 0.076$ | 0.260<br>$\pm 0.063$        | 0.255<br>$\pm 0.048$ | 0.200<br>$\pm 0.077$ | 0.110<br>$\pm 0.029$ | 0.197<br>$\pm 0.073$ | 0.028<br>$\pm 0.016$  | 0.085<br>$\pm 0.029$ | 0.045<br>$\pm 0.021$ | 0.050<br>$\pm 0.043$  | 0.100<br>$\pm 0.031$ | 0.295<br>$\pm 0.116$        | 0.025<br>$\pm 0.025$  | <b>0.270</b><br>$\pm 0.089$ | 0.040<br>$\pm 0.014$  |
|           | Acc.1    | <b>0.270</b><br>$\pm 0.163$ | 0.170<br>$\pm 0.078$        | 0.220<br>$\pm 0.076$ | 0.260<br>$\pm 0.063$        | 0.255<br>$\pm 0.048$ | 0.209<br>$\pm 0.073$ | 0.106<br>$\pm 0.052$ | 0.182<br>$\pm 0.076$ | 0.035<br>$\pm 0.029$  | 0.062<br>$\pm 0.025$ | 0.056<br>$\pm 0.032$ | 0.031<br>$\pm 0.027$  | 0.091<br>$\pm 0.026$ | 0.287<br>$\pm 0.116$        | 0.025<br>$\pm 0.032$  | 0.253<br>$\pm 0.126$        | 0.034<br>$\pm 0.026$  |
|           | Acc.2    | 0.360<br>$\pm 0.197$        | 0.290<br>$\pm 0.088$        | 0.290<br>$\pm 0.060$ | 0.440<br>$\pm 0.045$        | 0.350<br>$\pm 0.050$ | 0.278<br>$\pm 0.073$ | 0.219<br>$\pm 0.103$ | 0.309<br>$\pm 0.091$ | 0.061<br>$\pm 0.059$  | 0.078<br>$\pm 0.019$ | 0.119<br>$\pm 0.051$ | 0.072<br>$\pm 0.059$  | 0.175<br>$\pm 0.059$ | <b>0.403</b><br>$\pm 0.110$ | 0.056<br>$\pm 0.042$  | 0.384<br>$\pm 0.102$        | 0.059<br>$\pm 0.034$  |
|           |          |                             |                             |                      |                             |                      |                      |                      |                      |                       |                      |                      |                       |                      |                             |                       |                             |                       |
| Subject10 | $\kappa$ | 0.128<br>$\pm 0.065$        | <b>0.138</b><br>$\pm 0.076$ | 0.036<br>$\pm 0.029$ | 0.108<br>$\pm 0.056$        | 0.051<br>$\pm 0.026$ | 0.051<br>$\pm 0.036$ | 0.021<br>$\pm 0.038$ | 0.010<br>$\pm 0.014$ | 0.015<br>$\pm 0.039$  | 0.072<br>$\pm 0.049$ | 0.036<br>$\pm 0.039$ | 0.005<br>$\pm 0.021$  | 0.064<br>$\pm 0.035$ | 0.154<br>$\pm 0.098$        | -0.021<br>$\pm 0.011$ | 0.118<br>$\pm 0.086$        | -0.010<br>$\pm 0.013$ |
|           | AUC      | 0.780<br>$\pm 0.060$        | 0.730<br>$\pm 0.039$        | 0.664<br>$\pm 0.069$ | <b>0.765</b><br>$\pm 0.028$ | 0.653<br>$\pm 0.043$ | 0.638<br>$\pm 0.051$ | 0.562<br>$\pm 0.035$ | 0.650<br>$\pm 0.027$ | 0.562<br>$\pm 0.026$  | 0.678<br>$\pm 0.040$ | 0.600<br>$\pm 0.035$ | 0.571<br>$\pm 0.039$  | 0.670<br>$\pm 0.040$ | 0.751<br>$\pm 0.043$        | 0.531<br>$\pm 0.038$  | 0.666<br>$\pm 0.052$        | 0.600<br>$\pm 0.054$  |
|           | BAcc     | 0.150<br>$\pm 0.064$        | <b>0.160</b><br>$\pm 0.074$ | 0.060<br>$\pm 0.029$ | 0.130<br>$\pm 0.054$        | 0.075<br>$\pm 0.025$ | 0.075<br>$\pm 0.035$ | 0.045<br>$\pm 0.037$ | 0.035<br>$\pm 0.014$ | 0.040<br>$\pm 0.038$  | 0.095<br>$\pm 0.048$ | 0.060<br>$\pm 0.038$ | 0.030<br>$\pm 0.021$  | 0.088<br>$\pm 0.034$ | 0.175<br>$\pm 0.095$        | 0.005<br>$\pm 0.011$  | 0.140<br>$\pm 0.084$        | 0.015<br>$\pm 0.013$  |
|           | Acc.1    | 0.150<br>$\pm 0.064$        | 0.160<br>$\pm 0.074$        | 0.060<br>$\pm 0.029$ | 0.130<br>$\pm 0.054$        | 0.075<br>$\pm 0.025$ | 0.084<br>$\pm 0.041$ | 0.047<br>$\pm 0.046$ | 0.041<br>$\pm 0.034$ | 0.044<br>$\pm 0.064$  | 0.078<br>$\pm 0.049$ | 0.094<br>$\pm 0.040$ | 0.037<br>$\pm 0.032$  | 0.094<br>$\pm 0.067$ | <b>0.166</b><br>$\pm 0.106$ | 0.003<br>$\pm 0.007$  | 0.191<br>$\pm 0.086$        | 0.009<br>$\pm 0.008$  |
|           | Acc.2    | <b>0.260</b><br>$\pm 0.095$ | 0.245<br>$\pm 0.037$        | 0.125<br>$\pm 0.040$ | 0.215<br>$\pm 0.072$        | 0.140<br>$\pm 0.052$ | 0.156<br>$\pm 0.046$ | 0.087<br>$\pm 0.053$ | 0.116<br>$\pm 0.053$ | 0.081<br>$\pm 0.065$  | 0.141<br>$\pm 0.065$ | 0.138<br>$\pm 0.013$ | 0.056<br>$\pm 0.041$  | 0.154<br>$\pm 0.107$ | 0.250<br>$\pm 0.169$        | 0.028<br>$\pm 0.023$  | 0.266<br>$\pm 0.089$        | 0.037<br>$\pm 0.031$  |
|           |          |                             |                             |                      |                             |                      |                      |                      |                      |                       |                      |                      |                       |                      |                             |                       |                             |                       |
| Subject11 | $\kappa$ | 0.113<br>$\pm 0.086$        | 0.077<br>$\pm 0.044$        | 0.041<br>$\pm 0.029$ | 0.071<br>$\pm 0.027$        | 0.036<br>$\pm 0.034$ | 0.046<br>$\pm 0.011$ | 0.062<br>$\pm 0.029$ | 0.088<br>$\pm 0.029$ | -0.026<br>$\pm 0.000$ | 0.026<br>$\pm 0.034$ | 0.026<br>$\pm 0.018$ | -0.000<br>$\pm 0.018$ | 0.010<br>$\pm 0.029$ | <b>0.103</b><br>$\pm 0.051$ | -0.005<br>$\pm 0.033$ | 0.062<br>$\pm 0.039$        | 0.006<br>$\pm 0.018$  |
|           | AUC      | 0.750<br>$\pm 0.026$        | <b>0.718</b><br>$\pm 0.028$ | 0.623<br>$\pm 0.031$ | 0.718<br>$\pm 0.040$        | 0.636<br>$\pm 0.046$ | 0.592<br>$\pm 0.052$ | 0.635<br>$\pm 0.045$ | 0.684<br>$\pm 0.041$ | 0.506<br>$\pm 0.039$  | 0.592<br>$\pm 0.058$ | 0.559<br>$\pm 0.066$ | 0.540<br>$\pm 0.019$  | 0.582<br>$\pm 0.032$ | 0.666<br>$\pm 0.018$        | 0.531<br>$\pm 0.052$  | 0.645<br>$\pm 0.033$        | 0.543<br>$\pm 0.028$  |
|           | BAcc     | 0.135<br>$\pm 0.084$        | 0.100<br>$\pm 0.043$        | 0.065<br>$\pm 0.029$ | 0.094<br>$\pm 0.026$        | 0.060<br>$\pm 0.034$ | 0.070<br>$\pm 0.011$ | 0.085<br>$\pm 0.029$ | 0.111<br>$\pm 0.028$ | 0.000<br>$\pm 0.000$  | 0.050<br>$\pm 0.033$ | 0.050<br>$\pm 0.018$ | 0.025<br>$\pm 0.018$  | 0.035<br>$\pm 0.029$ | <b>0.125</b><br>$\pm 0.050$ | 0.020<br>$\pm 0.033$  | 0.085<br>$\pm 0.038$        | 0.031<br>$\pm 0.018$  |
|           | Acc.1    | 0.135<br>$\pm 0.084$        | 0.100<br>$\pm 0.043$        | 0.059<br>$\pm 0.029$ | 0.111<br>$\pm 0.045$        | 0.060<br>$\pm 0.034$ | 0.081<br>$\pm 0.043$ | 0.100<br>$\pm 0.032$ | 0.095<br>$\pm 0.048$ | 0.000<br>$\pm 0.000$  | 0.049<br>$\pm 0.043$ | 0.069<br>$\pm 0.024$ | 0.025<br>$\pm 0.030$  | 0.031<br>$\pm 0.037$ | <b>0.113</b><br>$\pm 0.054$ | 0.013<br>$\pm 0.020$  | 0.072<br>$\pm 0.045$        | 0.025<br>$\pm 0.019$  |
|           | Acc.2    | 0.185<br>$\pm 0.108$        | 0.180<br>$\pm 0.065$        | 0.123<br>$\pm 0.034$ | 0.229<br>$\pm 0.121$        | 0.110<br>$\pm 0.055$ | 0.128<br>$\pm 0.037$ | 0.150<br>$\pm 0.032$ | 0.174<br>$\pm 0.093$ | 0.029<br>$\pm 0.033$  | 0.096<br>$\pm 0.056$ | 0.097<br>$\pm 0.037$ | 0.050<br>$\pm 0.026$  | 0.062<br>$\pm 0.037$ | <b>0.197</b><br>$\pm 0.065$ | 0.037<br>$\pm 0.026$  | 0.163<br>$\pm 0.048$        | 0.045<br>$\pm 0.035$  |
|           |          |                             |                             |                      |                             |                      |                      |                      |                      |                       |                      |                      |                       |                      |                             |                       |                             |                       |

Continued on next page

| Subject   | Metric   | DeepConvnet                                                        | EEGNet                                           | Conformer                                        | CTNet                                                              | SSVEPDNN                                         | BIOT (f)                                         | BIOT (l)                                                           | BENDR (f)                                        | BENDR (l)                                         | CBraMod (f)                                      | CBraMod (l)                                      | EEGPT (f)                                        | EEGPT (l)                                                          | LaBraM (f)                                                         | LaBraM (l)                                       | STEEGformer-s (f)                                                  | STEEGformer-s (l)                                 |
|-----------|----------|--------------------------------------------------------------------|--------------------------------------------------|--------------------------------------------------|--------------------------------------------------------------------|--------------------------------------------------|--------------------------------------------------|--------------------------------------------------------------------|--------------------------------------------------|---------------------------------------------------|--------------------------------------------------|--------------------------------------------------|--------------------------------------------------|--------------------------------------------------------------------|--------------------------------------------------------------------|--------------------------------------------------|--------------------------------------------------------------------|---------------------------------------------------|
| Subject12 | $\kappa$ | $\begin{matrix} 0.077 \\ \pm 0.060 \end{matrix}$                   | $\begin{matrix} 0.015 \\ \pm 0.039 \end{matrix}$ | $\begin{matrix} 0.005 \\ \pm 0.042 \end{matrix}$ | $\begin{matrix} 0.041 \\ \pm 0.014 \end{matrix}$                   | $\begin{matrix} 0.041 \\ \pm 0.029 \end{matrix}$ | $\begin{matrix} 0.026 \\ \pm 0.036 \end{matrix}$ | $\begin{matrix} \mathbf{0.067} \\ \pm \mathbf{0.043} \end{matrix}$ | $\begin{matrix} 0.000 \\ \pm 0.023 \end{matrix}$ | $\begin{matrix} -0.005 \\ \pm 0.033 \end{matrix}$ | $\begin{matrix} 0.036 \\ \pm 0.034 \end{matrix}$ | $\begin{matrix} 0.005 \\ \pm 0.021 \end{matrix}$ | $\begin{matrix} 0.031 \\ \pm 0.028 \end{matrix}$ | $\begin{matrix} 0.041 \\ \pm 0.014 \end{matrix}$                   | $\begin{matrix} 0.062 \\ \pm 0.034 \end{matrix}$                   | $\begin{matrix} 0.021 \\ \pm 0.033 \end{matrix}$ | $\begin{matrix} 0.056 \\ \pm 0.049 \end{matrix}$                   | $\begin{matrix} 0.015 \\ \pm 0.014 \end{matrix}$  |
|           | AUC      | $\begin{matrix} 0.716 \\ \pm 0.118 \end{matrix}$                   | $\begin{matrix} 0.597 \\ \pm 0.033 \end{matrix}$ | $\begin{matrix} 0.558 \\ \pm 0.025 \end{matrix}$ | $\begin{matrix} 0.683 \\ \pm 0.027 \end{matrix}$                   | $\begin{matrix} 0.624 \\ \pm 0.015 \end{matrix}$ | $\begin{matrix} 0.622 \\ \pm 0.075 \end{matrix}$ | $\begin{matrix} 0.617 \\ \pm 0.066 \end{matrix}$                   | $\begin{matrix} 0.577 \\ \pm 0.036 \end{matrix}$ | $\begin{matrix} 0.488 \\ \pm 0.035 \end{matrix}$  | $\begin{matrix} 0.607 \\ \pm 0.053 \end{matrix}$ | $\begin{matrix} 0.582 \\ \pm 0.038 \end{matrix}$ | $\begin{matrix} 0.597 \\ \pm 0.047 \end{matrix}$ | $\begin{matrix} \mathbf{0.698} \\ \pm \mathbf{0.038} \end{matrix}$ | $\begin{matrix} 0.595 \\ \pm 0.050 \end{matrix}$                   | $\begin{matrix} 0.488 \\ \pm 0.042 \end{matrix}$ | $\begin{matrix} 0.604 \\ \pm 0.057 \end{matrix}$                   | $\begin{matrix} 0.513 \\ \pm 0.037 \end{matrix}$  |
|           | BAcc     | $\begin{matrix} 0.100 \\ \pm 0.059 \end{matrix}$                   | $\begin{matrix} 0.040 \\ \pm 0.038 \end{matrix}$ | $\begin{matrix} 0.030 \\ \pm 0.041 \end{matrix}$ | $\begin{matrix} 0.065 \\ \pm 0.014 \end{matrix}$                   | $\begin{matrix} 0.065 \\ \pm 0.029 \end{matrix}$ | $\begin{matrix} 0.050 \\ \pm 0.035 \end{matrix}$ | $\begin{matrix} \mathbf{0.090} \\ \pm \mathbf{0.042} \end{matrix}$ | $\begin{matrix} 0.025 \\ \pm 0.022 \end{matrix}$ | $\begin{matrix} 0.020 \\ \pm 0.033 \end{matrix}$  | $\begin{matrix} 0.060 \\ \pm 0.034 \end{matrix}$ | $\begin{matrix} 0.030 \\ \pm 0.021 \end{matrix}$ | $\begin{matrix} 0.055 \\ \pm 0.027 \end{matrix}$ | $\begin{matrix} 0.065 \\ \pm 0.014 \end{matrix}$                   | $\begin{matrix} 0.085 \\ \pm 0.034 \end{matrix}$                   | $\begin{matrix} 0.045 \\ \pm 0.033 \end{matrix}$ | $\begin{matrix} 0.080 \\ \pm 0.048 \end{matrix}$                   | $\begin{matrix} 0.040 \\ \pm 0.014 \end{matrix}$  |
|           | Acc.1    | $\begin{matrix} \mathbf{0.091} \\ \pm \mathbf{0.056} \end{matrix}$ | $\begin{matrix} 0.034 \\ \pm 0.034 \end{matrix}$ | $\begin{matrix} 0.037 \\ \pm 0.067 \end{matrix}$ | $\begin{matrix} 0.050 \\ \pm 0.026 \end{matrix}$                   | $\begin{matrix} 0.065 \\ \pm 0.029 \end{matrix}$ | $\begin{matrix} 0.041 \\ \pm 0.036 \end{matrix}$ | $\begin{matrix} 0.084 \\ \pm 0.046 \end{matrix}$                   | $\begin{matrix} 0.031 \\ \pm 0.047 \end{matrix}$ | $\begin{matrix} 0.041 \\ \pm 0.062 \end{matrix}$  | $\begin{matrix} 0.066 \\ \pm 0.060 \end{matrix}$ | $\begin{matrix} 0.028 \\ \pm 0.030 \end{matrix}$ | $\begin{matrix} 0.034 \\ \pm 0.017 \end{matrix}$ | $\begin{matrix} 0.041 \\ \pm 0.009 \end{matrix}$                   | $\begin{matrix} 0.100 \\ \pm 0.048 \end{matrix}$                   | $\begin{matrix} 0.047 \\ \pm 0.040 \end{matrix}$ | $\begin{matrix} 0.069 \\ \pm 0.050 \end{matrix}$                   | $\begin{matrix} 0.025 \\ \pm 0.009 \end{matrix}$  |
|           | Acc.2    | $\begin{matrix} \mathbf{0.169} \\ \pm \mathbf{0.126} \end{matrix}$ | $\begin{matrix} 0.078 \\ \pm 0.086 \end{matrix}$ | $\begin{matrix} 0.081 \\ \pm 0.072 \end{matrix}$ | $\begin{matrix} 0.116 \\ \pm 0.055 \end{matrix}$                   | $\begin{matrix} 0.095 \\ \pm 0.027 \end{matrix}$ | $\begin{matrix} 0.106 \\ \pm 0.030 \end{matrix}$ | $\begin{matrix} 0.125 \\ \pm 0.073 \end{matrix}$                   | $\begin{matrix} 0.062 \\ \pm 0.056 \end{matrix}$ | $\begin{matrix} 0.050 \\ \pm 0.055 \end{matrix}$  | $\begin{matrix} 0.122 \\ \pm 0.058 \end{matrix}$ | $\begin{matrix} 0.047 \\ \pm 0.037 \end{matrix}$ | $\begin{matrix} 0.062 \\ \pm 0.044 \end{matrix}$ | $\begin{matrix} 0.084 \\ \pm 0.034 \end{matrix}$                   | $\begin{matrix} 0.175 \\ \pm 0.064 \end{matrix}$                   | $\begin{matrix} 0.066 \\ \pm 0.036 \end{matrix}$ | $\begin{matrix} 0.119 \\ \pm 0.049 \end{matrix}$                   | $\begin{matrix} 0.056 \\ \pm 0.038 \end{matrix}$  |
| Subject13 | $\kappa$ | $\begin{matrix} 0.456 \\ \pm 0.100 \end{matrix}$                   | $\begin{matrix} 0.359 \\ \pm 0.036 \end{matrix}$ | $\begin{matrix} 0.354 \\ \pm 0.126 \end{matrix}$ | $\begin{matrix} 0.477 \\ \pm 0.056 \end{matrix}$                   | $\begin{matrix} 0.256 \\ \pm 0.036 \end{matrix}$ | $\begin{matrix} 0.338 \\ \pm 0.066 \end{matrix}$ | $\begin{matrix} 0.138 \\ \pm 0.056 \end{matrix}$                   | $\begin{matrix} 0.459 \\ \pm 0.088 \end{matrix}$ | $\begin{matrix} 0.018 \\ \pm 0.044 \end{matrix}$  | $\begin{matrix} 0.108 \\ \pm 0.038 \end{matrix}$ | $\begin{matrix} 0.000 \\ \pm 0.018 \end{matrix}$ | $\begin{matrix} 0.144 \\ \pm 0.033 \end{matrix}$ | $\begin{matrix} 0.338 \\ \pm 0.033 \end{matrix}$                   | $\begin{matrix} \mathbf{0.465} \\ \pm \mathbf{0.060} \end{matrix}$ | $\begin{matrix} 0.010 \\ \pm 0.023 \end{matrix}$ | $\begin{matrix} 0.379 \\ \pm 0.144 \end{matrix}$                   | $\begin{matrix} 0.035 \\ \pm 0.067 \end{matrix}$  |
|           | AUC      | $\begin{matrix} 0.947 \\ \pm 0.024 \end{matrix}$                   | $\begin{matrix} 0.914 \\ \pm 0.034 \end{matrix}$ | $\begin{matrix} 0.904 \\ \pm 0.045 \end{matrix}$ | $\begin{matrix} \mathbf{0.937} \\ \pm \mathbf{0.022} \end{matrix}$ | $\begin{matrix} 0.838 \\ \pm 0.033 \end{matrix}$ | $\begin{matrix} 0.844 \\ \pm 0.039 \end{matrix}$ | $\begin{matrix} 0.805 \\ \pm 0.061 \end{matrix}$                   | $\begin{matrix} 0.937 \\ \pm 0.020 \end{matrix}$ | $\begin{matrix} 0.577 \\ \pm 0.053 \end{matrix}$  | $\begin{matrix} 0.718 \\ \pm 0.068 \end{matrix}$ | $\begin{matrix} 0.538 \\ \pm 0.036 \end{matrix}$ | $\begin{matrix} 0.791 \\ \pm 0.027 \end{matrix}$ | $\begin{matrix} 0.922 \\ \pm 0.029 \end{matrix}$                   | $\begin{matrix} 0.927 \\ \pm 0.026 \end{matrix}$                   | $\begin{matrix} 0.552 \\ \pm 0.040 \end{matrix}$ | $\begin{matrix} 0.855 \\ \pm 0.074 \end{matrix}$                   | $\begin{matrix} 0.648 \\ \pm 0.024 \end{matrix}$  |
|           | BAcc     | $\begin{matrix} 0.470 \\ \pm 0.097 \end{matrix}$                   | $\begin{matrix} 0.375 \\ \pm 0.035 \end{matrix}$ | $\begin{matrix} 0.370 \\ \pm 0.123 \end{matrix}$ | $\begin{matrix} 0.490 \\ \pm 0.055 \end{matrix}$                   | $\begin{matrix} 0.275 \\ \pm 0.035 \end{matrix}$ | $\begin{matrix} 0.355 \\ \pm 0.065 \end{matrix}$ | $\begin{matrix} 0.160 \\ \pm 0.055 \end{matrix}$                   | $\begin{matrix} 0.472 \\ \pm 0.086 \end{matrix}$ | $\begin{matrix} 0.043 \\ \pm 0.043 \end{matrix}$  | $\begin{matrix} 0.130 \\ \pm 0.037 \end{matrix}$ | $\begin{matrix} 0.025 \\ \pm 0.018 \end{matrix}$ | $\begin{matrix} 0.166 \\ \pm 0.033 \end{matrix}$ | $\begin{matrix} 0.355 \\ \pm 0.033 \end{matrix}$                   | $\begin{matrix} \mathbf{0.478} \\ \pm \mathbf{0.059} \end{matrix}$ | $\begin{matrix} 0.035 \\ \pm 0.022 \end{matrix}$ | $\begin{matrix} 0.395 \\ \pm 0.141 \end{matrix}$                   | $\begin{matrix} 0.059 \\ \pm 0.065 \end{matrix}$  |
|           | Acc.1    | $\begin{matrix} 0.470 \\ \pm 0.097 \end{matrix}$                   | $\begin{matrix} 0.375 \\ \pm 0.035 \end{matrix}$ | $\begin{matrix} 0.370 \\ \pm 0.123 \end{matrix}$ | $\begin{matrix} \mathbf{0.490} \\ \pm \mathbf{0.055} \end{matrix}$ | $\begin{matrix} 0.275 \\ \pm 0.035 \end{matrix}$ | $\begin{matrix} 0.400 \\ \pm 0.093 \end{matrix}$ | $\begin{matrix} 0.194 \\ \pm 0.072 \end{matrix}$                   | $\begin{matrix} 0.462 \\ \pm 0.105 \end{matrix}$ | $\begin{matrix} 0.047 \\ \pm 0.050 \end{matrix}$  | $\begin{matrix} 0.147 \\ \pm 0.063 \end{matrix}$ | $\begin{matrix} 0.025 \\ \pm 0.024 \end{matrix}$ | $\begin{matrix} 0.221 \\ \pm 0.060 \end{matrix}$ | $\begin{matrix} 0.391 \\ \pm 0.062 \end{matrix}$                   | $\begin{matrix} 0.504 \\ \pm 0.079 \end{matrix}$                   | $\begin{matrix} 0.022 \\ \pm 0.014 \end{matrix}$ | $\begin{matrix} 0.388 \\ \pm 0.130 \end{matrix}$                   | $\begin{matrix} 0.049 \\ \pm 0.072 \end{matrix}$  |
|           | Acc.2    | $\begin{matrix} 0.650 \\ \pm 0.088 \end{matrix}$                   | $\begin{matrix} 0.550 \\ \pm 0.098 \end{matrix}$ | $\begin{matrix} 0.520 \\ \pm 0.124 \end{matrix}$ | $\begin{matrix} 0.640 \\ \pm 0.052 \end{matrix}$                   | $\begin{matrix} 0.430 \\ \pm 0.089 \end{matrix}$ | $\begin{matrix} 0.522 \\ \pm 0.091 \end{matrix}$ | $\begin{matrix} 0.341 \\ \pm 0.083 \end{matrix}$                   | $\begin{matrix} 0.677 \\ \pm 0.061 \end{matrix}$ | $\begin{matrix} 0.074 \\ \pm 0.081 \end{matrix}$  | $\begin{matrix} 0.228 \\ \pm 0.072 \end{matrix}$ | $\begin{matrix} 0.072 \\ \pm 0.059 \end{matrix}$ | $\begin{matrix} 0.320 \\ \pm 0.072 \end{matrix}$ | $\begin{matrix} 0.600 \\ \pm 0.069 \end{matrix}$                   | $\begin{matrix} \mathbf{0.652} \\ \pm \mathbf{0.070} \end{matrix}$ | $\begin{matrix} 0.062 \\ \pm 0.043 \end{matrix}$ | $\begin{matrix} 0.566 \\ \pm 0.123 \end{matrix}$                   | $\begin{matrix} 0.113 \\ \pm 0.067 \end{matrix}$  |
| Subject14 | $\kappa$ | $\begin{matrix} 0.513 \\ \pm 0.110 \end{matrix}$                   | $\begin{matrix} 0.359 \\ \pm 0.075 \end{matrix}$ | $\begin{matrix} 0.390 \\ \pm 0.042 \end{matrix}$ | $\begin{matrix} 0.390 \\ \pm 0.071 \end{matrix}$                   | $\begin{matrix} 0.231 \\ \pm 0.051 \end{matrix}$ | $\begin{matrix} 0.405 \\ \pm 0.046 \end{matrix}$ | $\begin{matrix} 0.277 \\ \pm 0.071 \end{matrix}$                   | $\begin{matrix} 0.503 \\ \pm 0.120 \end{matrix}$ | $\begin{matrix} 0.000 \\ \pm 0.018 \end{matrix}$  | $\begin{matrix} 0.113 \\ \pm 0.059 \end{matrix}$ | $\begin{matrix} 0.041 \\ \pm 0.014 \end{matrix}$ | $\begin{matrix} 0.185 \\ \pm 0.091 \end{matrix}$ | $\begin{matrix} 0.256 \\ \pm 0.073 \end{matrix}$                   | $\begin{matrix} \mathbf{0.533} \\ \pm \mathbf{0.090} \end{matrix}$ | $\begin{matrix} 0.021 \\ \pm 0.049 \end{matrix}$ | $\begin{matrix} 0.559 \\ \pm 0.118 \end{matrix}$                   | $\begin{matrix} 0.046 \\ \pm 0.033 \end{matrix}$  |
|           | AUC      | $\begin{matrix} 0.965 \\ \pm 0.013 \end{matrix}$                   | $\begin{matrix} 0.922 \\ \pm 0.018 \end{matrix}$ | $\begin{matrix} 0.937 \\ \pm 0.002 \end{matrix}$ | $\begin{matrix} \mathbf{0.952} \\ \pm \mathbf{0.010} \end{matrix}$ | $\begin{matrix} 0.844 \\ \pm 0.031 \end{matrix}$ | $\begin{matrix} 0.894 \\ \pm 0.033 \end{matrix}$ | $\begin{matrix} 0.879 \\ \pm 0.028 \end{matrix}$                   | $\begin{matrix} 0.947 \\ \pm 0.031 \end{matrix}$ | $\begin{matrix} 0.598 \\ \pm 0.028 \end{matrix}$  | $\begin{matrix} 0.734 \\ \pm 0.057 \end{matrix}$ | $\begin{matrix} 0.676 \\ \pm 0.046 \end{matrix}$ | $\begin{matrix} 0.781 \\ \pm 0.043 \end{matrix}$ | $\begin{matrix} 0.901 \\ \pm 0.007 \end{matrix}$                   | $\begin{matrix} 0.920 \\ \pm 0.017 \end{matrix}$                   | $\begin{matrix} 0.623 \\ \pm 0.044 \end{matrix}$ | $\begin{matrix} 0.929 \\ \pm 0.035 \end{matrix}$                   | $\begin{matrix} 0.663 \\ \pm 0.017 \end{matrix}$  |
|           | BAcc     | $\begin{matrix} 0.525 \\ \pm 0.108 \end{matrix}$                   | $\begin{matrix} 0.375 \\ \pm 0.073 \end{matrix}$ | $\begin{matrix} 0.405 \\ \pm 0.041 \end{matrix}$ | $\begin{matrix} 0.405 \\ \pm 0.069 \end{matrix}$                   | $\begin{matrix} 0.250 \\ \pm 0.050 \end{matrix}$ | $\begin{matrix} 0.420 \\ \pm 0.045 \end{matrix}$ | $\begin{matrix} 0.295 \\ \pm 0.069 \end{matrix}$                   | $\begin{matrix} 0.515 \\ \pm 0.117 \end{matrix}$ | $\begin{matrix} 0.025 \\ \pm 0.018 \end{matrix}$  | $\begin{matrix} 0.135 \\ \pm 0.058 \end{matrix}$ | $\begin{matrix} 0.065 \\ \pm 0.014 \end{matrix}$ | $\begin{matrix} 0.205 \\ \pm 0.089 \end{matrix}$ | $\begin{matrix} 0.275 \\ \pm 0.071 \end{matrix}$                   | $\begin{matrix} \mathbf{0.545} \\ \pm \mathbf{0.087} \end{matrix}$ | $\begin{matrix} 0.045 \\ \pm 0.048 \end{matrix}$ | $\begin{matrix} 0.570 \\ \pm 0.115 \end{matrix}$                   | $\begin{matrix} 0.070 \\ \pm 0.033 \end{matrix}$  |
|           | Acc.1    | $\begin{matrix} 0.525 \\ \pm 0.108 \end{matrix}$                   | $\begin{matrix} 0.375 \\ \pm 0.073 \end{matrix}$ | $\begin{matrix} 0.405 \\ \pm 0.041 \end{matrix}$ | $\begin{matrix} 0.394 \\ \pm 0.120 \end{matrix}$                   | $\begin{matrix} 0.252 \\ \pm 0.049 \end{matrix}$ | $\begin{matrix} 0.422 \\ \pm 0.067 \end{matrix}$ | $\begin{matrix} 0.297 \\ \pm 0.072 \end{matrix}$                   | $\begin{matrix} 0.500 \\ \pm 0.134 \end{matrix}$ | $\begin{matrix} 0.025 \\ \pm 0.024 \end{matrix}$  | $\begin{matrix} 0.122 \\ \pm 0.058 \end{matrix}$ | $\begin{matrix} 0.087 \\ \pm 0.009 \end{matrix}$ | $\begin{matrix} 0.212 \\ \pm 0.134 \end{matrix}$ | $\begin{matrix} 0.266 \\ \pm 0.090 \end{matrix}$                   | $\begin{matrix} 0.566 \\ \pm 0.081 \end{matrix}$                   | $\begin{matrix} 0.047 \\ \pm 0.053 \end{matrix}$ | $\begin{matrix} \mathbf{0.562} \\ \pm \mathbf{0.167} \end{matrix}$ | $\begin{matrix} 0.081 \\ \pm 0.072 \end{matrix}$  |
|           | Acc.2    | $\begin{matrix} \mathbf{0.695} \\ \pm \mathbf{0.141} \end{matrix}$ | $\begin{matrix} 0.510 \\ \pm 0.084 \end{matrix}$ | $\begin{matrix} 0.595 \\ \pm 0.089 \end{matrix}$ | $\begin{matrix} 0.622 \\ \pm 0.069 \end{matrix}$                   | $\begin{matrix} 0.376 \\ \pm 0.039 \end{matrix}$ | $\begin{matrix} 0.631 \\ \pm 0.074 \end{matrix}$ | $\begin{matrix} 0.444 \\ \pm 0.110 \end{matrix}$                   | $\begin{matrix} 0.656 \\ \pm 0.153 \end{matrix}$ | $\begin{matrix} 0.053 \\ \pm 0.034 \end{matrix}$  | $\begin{matrix} 0.194 \\ \pm 0.042 \end{matrix}$ | $\begin{matrix} 0.134 \\ \pm 0.062 \end{matrix}$ | $\begin{matrix} 0.306 \\ \pm 0.139 \end{matrix}$ | $\begin{matrix} 0.431 \\ \pm 0.090 \end{matrix}$                   | $\begin{matrix} 0.750 \\ \pm 0.096 \end{matrix}$                   | $\begin{matrix} 0.078 \\ \pm 0.064 \end{matrix}$ | $\begin{matrix} 0.684 \\ \pm 0.117 \end{matrix}$                   | $\begin{matrix} 0.128 \\ \pm 0.062 \end{matrix}$  |
| Subject15 | $\kappa$ | $\begin{matrix} 0.195 \\ \pm 0.072 \end{matrix}$                   | $\begin{matrix} 0.128 \\ \pm 0.065 \end{matrix}$ | $\begin{matrix} 0.133 \\ \pm 0.038 \end{matrix}$ | $\begin{matrix} 0.179 \\ \pm 0.081 \end{matrix}$                   | $\begin{matrix} 0.164 \\ \pm 0.069 \end{matrix}$ | $\begin{matrix} 0.226 \\ \pm 0.061 \end{matrix}$ | $\begin{matrix} 0.144 \\ \pm 0.059 \end{matrix}$                   | $\begin{matrix} 0.262 \\ \pm 0.078 \end{matrix}$ | $\begin{matrix} 0.015 \\ \pm 0.014 \end{matrix}$  | $\begin{matrix} 0.077 \\ \pm 0.041 \end{matrix}$ | $\begin{matrix} 0.005 \\ \pm 0.021 \end{matrix}$ | $\begin{matrix} 0.077 \\ \pm 0.048 \end{matrix}$ | $\begin{matrix} 0.088 \\ \pm 0.039 \end{matrix}$                   | $\begin{matrix} \mathbf{0.236} \\ \pm \mathbf{0.066} \end{matrix}$ | $\begin{matrix} 0.010 \\ \pm 0.034 \end{matrix}$ | $\begin{matrix} 0.210 \\ \pm 0.064 \end{matrix}$                   | $\begin{matrix} -0.021 \\ \pm 0.011 \end{matrix}$ |

Continued on next page

|                        |           | 8271             | 8272             | 8273            | 8274             | 8275             | 8276             | 8277             | 8278             | 8279            | 8280            | 8281            | 8282            | 8283            | 8284             | 8285             | 8286              | 8287              | 8288            | 8289 | 8290 | 8291 | 8292 | 8293 | 8294 | 8295 | 8296 | 8297 | 8298 | 8299 | 8300 | 8301 | 8302 | 8303 |
|------------------------|-----------|------------------|------------------|-----------------|------------------|------------------|------------------|------------------|------------------|-----------------|-----------------|-----------------|-----------------|-----------------|------------------|------------------|-------------------|-------------------|-----------------|------|------|------|------|------|------|------|------|------|------|------|------|------|------|------|
| Subject                | Metric    | DeepConvnet      | EEGNet           | Conformer       | CTNet            | SSVEPDNN         | BIOT (f)         | BIOT (l)         | BENDR (f)        | BENDR (l)       | CBraMod (f)     | CBraMod (l)     | EEGPT (f)       | EEGPT (l)       | LaBraM (f)       | LaBraM (l)       | STEEGformer-s (f) | STEEGformer-s (l) |                 |      |      |      |      |      |      |      |      |      |      |      |      |      |      |      |
| Subject16              | AUC       | 0.838<br>± 0.045 | 0.785<br>±0.051  | 0.736<br>±0.025 | 0.828<br>±0.047  | 0.789<br>±0.089  | 0.795<br>±0.044  | 0.768<br>±0.047  | 0.847<br>± 0.072 | 0.505<br>±0.075 | 0.654<br>±0.078 | 0.559<br>±0.067 | 0.694<br>±0.048 | 0.735<br>±0.027 | 0.790<br>±0.062  | 0.537<br>±0.061  | 0.755<br>±0.073   | 0.555<br>±0.019   |                 |      |      |      |      |      |      |      |      |      |      |      |      |      |      |      |
|                        | BAcc      | 0.215<br>±0.070  | 0.150<br>±0.064  | 0.155<br>±0.037 | 0.200<br>±0.079  | 0.185<br>±0.068  | 0.245<br>±0.060  | 0.165<br>±0.058  | 0.280<br>± 0.076 | 0.040<br>±0.014 | 0.100<br>±0.040 | 0.030<br>±0.021 | 0.100<br>±0.047 | 0.111<br>±0.038 | 0.255<br>± 0.065 | 0.035<br>±0.034  | 0.230<br>±0.062   | 0.005<br>±0.011   |                 |      |      |      |      |      |      |      |      |      |      |      |      |      |      |      |
|                        | Acc.1     | 0.215<br>±0.070  | 0.150<br>±0.064  | 0.134<br>±0.050 | 0.228<br>±0.106  | 0.185<br>±0.068  | 0.284<br>±0.124  | 0.188<br>±0.070  | 0.325<br>± 0.131 | 0.053<br>±0.021 | 0.127<br>±0.056 | 0.037<br>±0.032 | 0.128<br>±0.081 | 0.109<br>±0.052 | 0.309<br>± 0.112 | 0.041<br>±0.044  | 0.275<br>±0.049   | 0.003<br>±0.007   |                 |      |      |      |      |      |      |      |      |      |      |      |      |      |      |      |
|                        | Acc.2     | 0.340<br>±0.084  | 0.275<br>±0.035  | 0.200<br>±0.036 | 0.356<br>±0.043  | 0.290<br>±0.082  | 0.444<br>± 0.116 | 0.291<br>±0.057  | 0.441<br>±0.173  | 0.097<br>±0.060 | 0.195<br>±0.058 | 0.084<br>±0.055 | 0.263<br>±0.095 | 0.203<br>±0.077 | 0.469<br>± 0.089 | 0.084<br>±0.058  | 0.406<br>±0.117   | 0.025<br>±0.014   |                 |      |      |      |      |      |      |      |      |      |      |      |      |      |      |      |
|                        | κ         | 0.292<br>±0.263  | 0.246<br>±0.069  | 0.231<br>±0.068 | 0.400<br>± 0.082 | 0.200<br>±0.088  | 0.287<br>±0.064  | 0.154<br>±0.026  | 0.349<br>± 0.067 | 0.015<br>±0.029 | 0.060<br>±0.050 | 0.010<br>±0.039 | 0.026<br>±0.032 | 0.158<br>±0.040 | 0.323<br>±0.047  | 0.005<br>±0.028  | 0.346<br>±0.089   | 0.026<br>±0.036   |                 |      |      |      |      |      |      |      |      |      |      |      |      |      |      |      |
|                        | AUC       | 0.810<br>±0.206  | 0.905<br>± 0.021 | 0.859<br>±0.038 | 0.927<br>± 0.031 | 0.823<br>±0.041  | 0.841<br>±0.028  | 0.789<br>±0.045  | 0.886<br>±0.035  | 0.552<br>±0.054 | 0.640<br>±0.036 | 0.604<br>±0.038 | 0.678<br>±0.039 | 0.760<br>±0.040 | 0.864<br>±0.020  | 0.518<br>±0.061  | 0.849<br>±0.046   | 0.567<br>±0.069   |                 |      |      |      |      |      |      |      |      |      |      |      |      |      |      |      |
|                        | BAcc      | 0.310<br>±0.257  | 0.265<br>±0.068  | 0.250<br>±0.066 | 0.415<br>± 0.080 | 0.220<br>±0.086  | 0.305<br>±0.062  | 0.175<br>±0.025  | 0.365<br>± 0.065 | 0.040<br>±0.029 | 0.083<br>±0.049 | 0.035<br>±0.038 | 0.050<br>±0.032 | 0.179<br>±0.039 | 0.340<br>±0.045  | 0.030<br>±0.027  | 0.362<br>±0.087   | 0.050<br>±0.035   |                 |      |      |      |      |      |      |      |      |      |      |      |      |      |      |      |
|                        | Acc.1     | 0.310<br>±0.257  | 0.265<br>±0.068  | 0.250<br>±0.066 | 0.415<br>± 0.080 | 0.220<br>±0.086  | 0.331<br>±0.051  | 0.175<br>±0.049  | 0.406<br>± 0.109 | 0.044<br>±0.040 | 0.068<br>±0.050 | 0.022<br>±0.024 | 0.062<br>±0.040 | 0.158<br>±0.045 | 0.344<br>±0.033  | 0.019<br>±0.017  | 0.338<br>±0.080   | 0.041<br>±0.036   |                 |      |      |      |      |      |      |      |      |      |      |      |      |      |      |      |
|                        | Acc.2     | 0.475<br>±0.361  | 0.460<br>±0.058  | 0.390<br>±0.078 | 0.565<br>± 0.068 | 0.350<br>±0.085  | 0.447<br>±0.065  | 0.281<br>±0.053  | 0.531<br>±0.125  | 0.069<br>±0.034 | 0.172<br>±0.076 | 0.103<br>±0.068 | 0.112<br>±0.056 | 0.214<br>±0.052 | 0.491<br>±0.053  | 0.069<br>±0.045  | 0.535<br>± 0.095  | 0.062<br>±0.035   |                 |      |      |      |      |      |      |      |      |      |      |      |      |      |      |      |
|                        | Subject17 | κ                | 0.369<br>±0.269  | 0.405<br>±0.066 | 0.390<br>±0.066  | 0.467<br>± 0.033 | 0.323<br>±0.182  | 0.446<br>± 0.069 | 0.251<br>±0.021  | 0.436<br>±0.077 | 0.000<br>±0.026 | 0.061<br>±0.060 | 0.026<br>±0.036 | 0.190<br>±0.023 | 0.168<br>±0.049  | 0.379<br>±0.071  | 0.010<br>±0.023   | 0.388<br>±0.078   | 0.010<br>±0.023 |      |      |      |      |      |      |      |      |      |      |      |      |      |      |      |
| AUC                    |           | 0.906<br>±0.116  | 0.922<br>±0.029  | 0.913<br>±0.036 | 0.953<br>± 0.019 | 0.850<br>±0.179  | 0.896<br>±0.027  | 0.869<br>±0.045  | 0.922<br>± 0.037 | 0.544<br>±0.036 | 0.674<br>±0.046 | 0.603<br>±0.035 | 0.774<br>±0.027 | 0.804<br>±0.051 | 0.893<br>±0.050  | 0.571<br>±0.059  | 0.876<br>±0.034   | 0.610<br>±0.037   |                 |      |      |      |      |      |      |      |      |      |      |      |      |      |      |      |
| BAcc                   |           | 0.385<br>±0.263  | 0.420<br>±0.065  | 0.405<br>±0.065 | 0.480<br>± 0.033 | 0.340<br>±0.177  | 0.460<br>± 0.068 | 0.270<br>±0.021  | 0.450<br>±0.075  | 0.025<br>±0.025 | 0.084<br>±0.058 | 0.050<br>±0.035 | 0.210<br>±0.022 | 0.189<br>±0.048 | 0.395<br>±0.069  | 0.035<br>±0.022  | 0.404<br>±0.076   | 0.035<br>±0.022   |                 |      |      |      |      |      |      |      |      |      |      |      |      |      |      |      |
| Acc.1                  |           | 0.385<br>±0.263  | 0.420<br>±0.065  | 0.441<br>±0.078 | 0.487<br>± 0.072 | 0.340<br>±0.177  | 0.522<br>± 0.118 | 0.281<br>±0.037  | 0.478<br>±0.084  | 0.016<br>±0.016 | 0.105<br>±0.049 | 0.059<br>±0.039 | 0.225<br>±0.075 | 0.185<br>±0.059 | 0.406<br>±0.055  | 0.022<br>±0.014  | 0.433<br>±0.127   | 0.031<br>±0.022   |                 |      |      |      |      |      |      |      |      |      |      |      |      |      |      |      |
| Acc.2                  |           | 0.525<br>±0.281  | 0.540<br>±0.063  | 0.534<br>±0.079 | 0.688<br>± 0.077 | 0.470<br>±0.239  | 0.669<br>± 0.051 | 0.481<br>±0.069  | 0.581<br>±0.119  | 0.059<br>±0.030 | 0.176<br>±0.094 | 0.087<br>±0.048 | 0.306<br>±0.050 | 0.283<br>±0.054 | 0.541<br>±0.075  | 0.044<br>±0.013  | 0.596<br>±0.115   | 0.053<br>±0.024   |                 |      |      |      |      |      |      |      |      |      |      |      |      |      |      |      |
| Subject18              |           | κ                | 0.508<br>±0.091  | 0.323<br>±0.088 | 0.421<br>±0.074  | 0.554<br>±0.078  | 0.451<br>±0.143  | 0.559<br>± 0.056 | 0.369<br>±0.047  | 0.436<br>±0.073 | 0.003<br>±0.032 | 0.064<br>±0.051 | 0.051<br>±0.031 | 0.097<br>±0.033 | 0.164<br>±0.088  | 0.567<br>± 0.099 | 0.041<br>±0.053   | 0.451<br>±0.084   | 0.015<br>±0.029 |      |      |      |      |      |      |      |      |      |      |      |      |      |      |      |
|                        | AUC       | 0.973<br>± 0.007 | 0.915<br>±0.033  | 0.938<br>±0.017 | 0.975<br>± 0.007 | 0.932<br>±0.051  | 0.962<br>±0.007  | 0.930<br>±0.025  | 0.945<br>±0.019  | 0.493<br>±0.047 | 0.644<br>±0.080 | 0.660<br>±0.054 | 0.706<br>±0.014 | 0.786<br>±0.050 | 0.951<br>±0.020  | 0.527<br>±0.033  | 0.914<br>±0.032   | 0.635<br>±0.048   |                 |      |      |      |      |      |      |      |      |      |      |      |      |      |      |      |
| Continued on next page |           |                  |                  |                 |                  |                  |                  |                  |                  |                 |                 |                 |                 |                 |                  |                  |                   |                   |                 |      |      |      |      |      |      |      |      |      |      |      |      |      |      |      |

Continued on next page

| Subject   | Metric   | DeepConvnet                    | EEGNet          | Conformer       | CTNet                          | SSVEPDNN        | BIOT <sup>(f)</sup>            | BIOT <sup>(l)</sup> | BENDR <sup>(f)</sup> | BENDR <sup>(l)</sup> | CBraMod <sup>(f)</sup> | CBraMod <sup>(l)</sup> | EEGPT <sup>(f)</sup> | EEGPT <sup>(l)</sup> | LaBraM <sup>(f)</sup>          | LaBraM <sup>(l)</sup> | STEEGformer-s <sup>(f)</sup>   | STEEGformer-s <sup>(l)</sup> |
|-----------|----------|--------------------------------|-----------------|-----------------|--------------------------------|-----------------|--------------------------------|---------------------|----------------------|----------------------|------------------------|------------------------|----------------------|----------------------|--------------------------------|-----------------------|--------------------------------|------------------------------|
|           | BAcc     | 0.520<br>±0.089                | 0.340<br>±0.086 | 0.435<br>±0.072 | 0.565<br>±0.076                | 0.465<br>±0.140 | <b>0.570</b><br>± <b>0.054</b> | 0.385<br>±0.045     | 0.450<br>±0.071      | 0.028<br>±0.031      | 0.087<br>±0.050        | 0.075<br>±0.030        | 0.120<br>±0.033      | 0.185<br>±0.086      | 0.578<br>± 0.097               | 0.065<br>±0.052       | 0.465<br>±0.082                | 0.040<br>±0.029              |
|           | Acc.1    | 0.520<br>±0.089                | 0.340<br>±0.086 | 0.435<br>±0.072 | <b>0.565</b><br>± <b>0.076</b> | 0.465<br>±0.140 | 0.562<br>±0.040                | 0.419<br>±0.042     | 0.451<br>±0.070      | 0.029<br>±0.035      | 0.072<br>±0.060        | 0.117<br>±0.055        | 0.150<br>±0.014      | 0.219<br>±0.106      | 0.596<br>± 0.112               | 0.062<br>±0.053       | 0.469<br>±0.066                | 0.044<br>±0.036              |
|           | Acc.2    | 0.700<br>±0.090                | 0.540<br>±0.118 | 0.615<br>±0.060 | <b>0.770</b><br>± <b>0.057</b> | 0.655<br>±0.129 | 0.794<br>± 0.078               | 0.622<br>±0.056     | 0.678<br>±0.099      | 0.061<br>±0.071      | 0.129<br>±0.076        | 0.188<br>±0.059        | 0.263<br>±0.078      | 0.319<br>±0.145      | 0.719<br>±0.082                | 0.094<br>±0.046       | 0.616<br>±0.066                | 0.081<br>±0.050              |
| Subject19 | $\kappa$ | 0.267<br>±0.090                | 0.174<br>±0.042 | 0.169<br>±0.059 | <b>0.292</b><br>± <b>0.043</b> | 0.123<br>±0.046 | 0.272<br>±0.072                | 0.097<br>±0.038     | 0.226<br>±0.042      | 0.015<br>±0.023      | 0.128<br>±0.041        | 0.005<br>±0.021        | 0.097<br>±0.033      | 0.087<br>±0.050      | 0.205<br>±0.060                | 0.015<br>±0.029       | 0.328<br>± 0.053               | 0.036<br>±0.039              |
|           | AUC      | <b>0.867</b><br>± <b>0.073</b> | 0.814<br>±0.038 | 0.828<br>±0.014 | 0.878<br>± 0.034               | 0.761<br>±0.049 | 0.829<br>±0.032                | 0.733<br>±0.060     | 0.833<br>±0.044      | 0.581<br>±0.080      | 0.738<br>±0.053        | 0.629<br>±0.028        | 0.716<br>±0.073      | 0.735<br>±0.036      | 0.782<br>±0.038                | 0.561<br>±0.058       | 0.833<br>±0.027                | 0.658<br>±0.032              |
|           | BAcc     | 0.285<br>±0.088                | 0.195<br>±0.041 | 0.190<br>±0.058 | <b>0.310</b><br>± <b>0.042</b> | 0.145<br>±0.045 | 0.290<br>±0.070                | 0.120<br>±0.037     | 0.245<br>±0.041      | 0.040<br>±0.022      | 0.150<br>±0.040        | 0.030<br>±0.021        | 0.120<br>±0.033      | 0.110<br>±0.049      | 0.225<br>±0.059                | 0.040<br>±0.029       | 0.345<br>± 0.051               | 0.060<br>±0.038              |
|           | Acc.1    | 0.276<br>±0.078                | 0.195<br>±0.041 | 0.190<br>±0.058 | 0.353<br>±0.063                | 0.145<br>±0.045 | <b>0.369</b><br>± <b>0.088</b> | 0.141<br>±0.046     | 0.228<br>±0.061      | 0.044<br>±0.028      | 0.150<br>±0.063        | 0.047<br>±0.037        | 0.141<br>±0.040      | 0.097<br>±0.047      | 0.244<br>±0.057                | 0.044<br>±0.040       | 0.375<br>± 0.054               | 0.056<br>±0.041              |
|           | Acc.2    | 0.367<br>±0.112                | 0.295<br>±0.048 | 0.345<br>±0.033 | 0.422<br>±0.046                | 0.255<br>±0.021 | 0.456<br>± 0.087               | 0.216<br>±0.069     | 0.359<br>±0.061      | 0.066<br>±0.046      | 0.241<br>±0.104        | 0.131<br>±0.041        | 0.191<br>±0.034      | 0.156<br>±0.067      | 0.362<br>±0.073                | 0.075<br>±0.053       | <b>0.447</b><br>± <b>0.066</b> | 0.097<br>±0.063              |
|           | $\kappa$ | 0.108<br>±0.088                | 0.082<br>±0.049 | 0.087<br>±0.039 | 0.132<br>±0.054                | 0.067<br>±0.053 | <b>0.138</b><br>± <b>0.080</b> | 0.077<br>±0.063     | 0.072<br>±0.058      | -0.005<br>±0.021     | 0.036<br>±0.047        | 0.031<br>±0.042        | 0.046<br>±0.021      | 0.067<br>±0.034      | 0.132<br>±0.078                | 0.005<br>±0.021       | 0.149<br>± 0.049               | 0.026<br>±0.045              |
| Subject2  | AUC      | <b>0.771</b><br>± <b>0.099</b> | 0.697<br>±0.037 | 0.756<br>±0.024 | 0.820<br>± 0.024               | 0.673<br>±0.038 | 0.749<br>±0.037                | 0.739<br>±0.028     | 0.638<br>±0.063      | 0.477<br>±0.041      | 0.628<br>±0.040        | 0.607<br>±0.058        | 0.614<br>±0.040      | 0.634<br>±0.071      | 0.748<br>±0.048                | 0.558<br>±0.054       | 0.693<br>±0.054                | 0.587<br>±0.020              |
|           | BAcc     | 0.130<br>±0.086                | 0.105<br>±0.048 | 0.110<br>±0.038 | 0.154<br>±0.053                | 0.090<br>±0.052 | <b>0.160</b><br>± <b>0.078</b> | 0.100<br>±0.061     | 0.095<br>±0.057      | 0.020<br>±0.021      | 0.060<br>±0.045        | 0.055<br>±0.041        | 0.070<br>±0.021      | 0.090<br>±0.034      | 0.154<br>±0.077                | 0.030<br>±0.021       | 0.170<br>± 0.048               | 0.050<br>±0.044              |
|           | Acc.1    | 0.130<br>±0.086                | 0.105<br>±0.048 | 0.110<br>±0.038 | 0.163<br>±0.092                | 0.090<br>±0.052 | 0.203<br>± 0.084               | 0.119<br>±0.055     | 0.097<br>±0.070      | 0.031<br>±0.053      | 0.075<br>±0.066        | 0.072<br>±0.058        | 0.072<br>±0.032      | 0.084<br>±0.028      | 0.198<br>±0.098                | 0.056<br>±0.032       | <b>0.200</b><br>± <b>0.084</b> | 0.069<br>±0.056              |
|           | Acc.2    | 0.245<br>±0.116                | 0.175<br>±0.064 | 0.205<br>±0.067 | 0.252<br>±0.078                | 0.175<br>±0.079 | 0.328<br>± 0.094               | 0.234<br>±0.080     | 0.175<br>±0.060      | 0.075<br>±0.056      | 0.144<br>±0.043        | 0.100<br>±0.061        | 0.097<br>±0.030      | 0.153<br>±0.068      | <b>0.310</b><br>± <b>0.079</b> | 0.109<br>±0.027       | 0.281<br>±0.108                | 0.131<br>±0.029              |
|           | $\kappa$ | 0.436<br>±0.018                | 0.277<br>±0.080 | 0.318<br>±0.029 | 0.348<br>±0.075                | 0.277<br>±0.105 | 0.405<br>±0.082                | 0.226<br>±0.042     | 0.348<br>±0.064      | 0.028<br>±0.035      | 0.128<br>±0.048        | 0.062<br>±0.029        | 0.210<br>±0.105      | 0.241<br>±0.039      | <b>0.492</b><br>± <b>0.115</b> | 0.000<br>±0.026       | 0.497<br>± 0.059               | 0.015<br>±0.037              |
|           | AUC      | 0.937<br>± 0.015               | 0.878<br>±0.037 | 0.863<br>±0.025 | 0.911<br>±0.012                | 0.856<br>±0.015 | 0.876<br>±0.037                | 0.826<br>±0.047     | 0.873<br>±0.018      | 0.562<br>±0.049      | 0.739<br>±0.062        | 0.691<br>±0.028        | 0.759<br>±0.055      | 0.864<br>±0.034      | <b>0.923</b><br>± <b>0.033</b> | 0.535<br>±0.072       | 0.892<br>±0.022                | 0.630<br>±0.041              |
| Subject20 | BAcc     | 0.450<br>±0.018                | 0.295<br>±0.078 | 0.335<br>±0.029 | 0.364<br>±0.073                | 0.295<br>±0.102 | 0.420<br>±0.080                | 0.245<br>±0.041     | 0.364<br>±0.063      | 0.053<br>±0.034      | 0.150<br>±0.047        | 0.085<br>±0.029        | 0.230<br>±0.102      | 0.260<br>±0.038      | <b>0.505</b><br>± <b>0.112</b> | 0.025<br>±0.025       | 0.510<br>± 0.058               | 0.040<br>±0.036              |

Continued on next page

| Subject   | Metric   | DeepConvnet     | EEGNet          | Conformer       | CTNet           | SSVEPDNN        | BIOT (f)        | BIOT (l)        | BENDR (f)       | BENDR (l)       | CBraMod (f)     | CBraMod (l)      | EEGPT (f)       | EEGPT (l)       | LaBraM (f)      | LaBraM (l)       | STEEGformer-s (f) | STEEGformer-s (l) |
|-----------|----------|-----------------|-----------------|-----------------|-----------------|-----------------|-----------------|-----------------|-----------------|-----------------|-----------------|------------------|-----------------|-----------------|-----------------|------------------|-------------------|-------------------|
| Subject21 | Acc.1    | 0.450<br>±0.018 | 0.295<br>±0.078 | 0.359<br>±0.053 | 0.408<br>±0.057 | 0.295<br>±0.102 | 0.487<br>±0.093 | 0.228<br>±0.077 | 0.362<br>±0.108 | 0.049<br>±0.031 | 0.131<br>±0.024 | 0.091<br>±0.049  | 0.256<br>±0.106 | 0.294<br>±0.064 | 0.597<br>±0.070 | 0.025<br>±0.032  | 0.553<br>±0.082   | 0.044<br>±0.032   |
|           |          | 0.595<br>±0.069 | 0.455<br>±0.097 | 0.497<br>±0.064 | 0.605<br>±0.083 | 0.445<br>±0.097 | 0.644<br>±0.151 | 0.412<br>±0.086 | 0.547<br>±0.106 | 0.069<br>±0.045 | 0.284<br>±0.079 | 0.128<br>±0.069  | 0.309<br>±0.107 | 0.459<br>±0.118 | 0.697<br>±0.060 | 0.056<br>±0.041  | 0.691<br>±0.046   | 0.094<br>±0.061   |
|           | $\kappa$ | 0.272<br>±0.181 | 0.328<br>±0.090 | 0.374<br>±0.029 | 0.426<br>±0.124 | 0.267<br>±0.097 | 0.287<br>±0.021 | 0.231<br>±0.083 | 0.436<br>±0.051 | 0.051<br>±0.018 | 0.067<br>±0.053 | -0.000<br>±0.026 | 0.092<br>±0.039 | 0.269<br>±0.087 | 0.349<br>±0.092 | 0.062<br>±0.029  | 0.513<br>±0.073   | 0.041<br>±0.050   |
|           |          | 0.860<br>±0.123 | 0.916<br>±0.043 | 0.911<br>±0.027 | 0.930<br>±0.042 | 0.848<br>±0.042 | 0.857<br>±0.026 | 0.829<br>±0.042 | 0.924<br>±0.018 | 0.581<br>±0.032 | 0.674<br>±0.090 | 0.606<br>±0.057  | 0.751<br>±0.048 | 0.888<br>±0.025 | 0.891<br>±0.024 | 0.649<br>±0.026  | 0.893<br>±0.023   | 0.666<br>±0.040   |
|           | AUC      | 0.290<br>±0.176 | 0.345<br>±0.087 | 0.390<br>±0.029 | 0.440<br>±0.121 | 0.285<br>±0.095 | 0.305<br>±0.021 | 0.250<br>±0.081 | 0.450<br>±0.050 | 0.075<br>±0.018 | 0.090<br>±0.052 | 0.025<br>±0.025  | 0.115<br>±0.038 | 0.288<br>±0.085 | 0.365<br>±0.089 | 0.085<br>±0.029  | 0.525<br>±0.071   | 0.065<br>±0.049   |
|           | BAcc     | 0.311<br>±0.212 | 0.328<br>±0.138 | 0.347<br>±0.068 | 0.444<br>±0.107 | 0.285<br>±0.095 | 0.266<br>±0.046 | 0.250<br>±0.094 | 0.384<br>±0.042 | 0.047<br>±0.011 | 0.075<br>±0.068 | 0.025<br>±0.032  | 0.138<br>±0.102 | 0.305<br>±0.099 | 0.350<br>±0.123 | 0.062<br>±0.025  | 0.503<br>±0.078   | 0.050<br>±0.051   |
| Subject22 | Acc.1    | 0.425<br>±0.293 | 0.441<br>±0.130 | 0.481<br>±0.095 | 0.594<br>±0.157 | 0.405<br>±0.082 | 0.431<br>±0.074 | 0.372<br>±0.097 | 0.600<br>±0.030 | 0.119<br>±0.078 | 0.128<br>±0.098 | 0.053<br>±0.032  | 0.209<br>±0.097 | 0.414<br>±0.099 | 0.463<br>±0.102 | 0.097<br>±0.026  | 0.634<br>±0.098   | 0.113<br>±0.063   |
|           |          | 0.462<br>±0.253 | 0.513<br>±0.119 | 0.508<br>±0.102 | 0.595<br>±0.076 | 0.390<br>±0.046 | 0.574<br>±0.094 | 0.385<br>±0.081 | 0.636<br>±0.021 | 0.036<br>±0.047 | 0.144<br>±0.094 | 0.056<br>±0.038  | 0.267<br>±0.064 | 0.421<br>±0.064 | 0.569<br>±0.049 | 0.046<br>±0.046  | 0.503<br>±0.082   | 0.015<br>±0.039   |
|           | AUC      | 0.930<br>±0.068 | 0.958<br>±0.015 | 0.968<br>±0.011 | 0.979<br>±0.007 | 0.888<br>±0.028 | 0.959<br>±0.006 | 0.943<br>±0.027 | 0.960<br>±0.020 | 0.622<br>±0.018 | 0.737<br>±0.049 | 0.681<br>±0.043  | 0.820<br>±0.022 | 0.921<br>±0.015 | 0.917<br>±0.021 | 0.604<br>±0.042  | 0.918<br>±0.025   | 0.661<br>±0.059   |
|           |          | 0.475<br>±0.246 | 0.525<br>±0.116 | 0.520<br>±0.099 | 0.605<br>±0.074 | 0.405<br>±0.045 | 0.585<br>±0.091 | 0.400<br>±0.079 | 0.645<br>±0.021 | 0.060<br>±0.045 | 0.165<br>±0.091 | 0.080<br>±0.037  | 0.285<br>±0.063 | 0.435<br>±0.063 | 0.580<br>±0.048 | 0.070<br>±0.045  | 0.515<br>±0.080   | 0.040<br>±0.038   |
|           | Acc.1    | 0.475<br>±0.246 | 0.525<br>±0.116 | 0.520<br>±0.099 | 0.605<br>±0.074 | 0.405<br>±0.045 | 0.647<br>±0.092 | 0.475<br>±0.083 | 0.628<br>±0.030 | 0.075<br>±0.087 | 0.188<br>±0.053 | 0.134<br>±0.042  | 0.347<br>±0.046 | 0.487<br>±0.063 | 0.653<br>±0.030 | 0.053<br>±0.041  | 0.575<br>±0.091   | 0.025<br>±0.024   |
|           |          | 0.645<br>±0.259 | 0.720<br>±0.111 | 0.690<br>±0.078 | 0.790<br>±0.074 | 0.540<br>±0.052 | 0.800<br>±0.040 | 0.644<br>±0.108 | 0.803<br>±0.036 | 0.106<br>±0.084 | 0.297<br>±0.083 | 0.194<br>±0.028  | 0.450<br>±0.110 | 0.613<br>±0.052 | 0.775<br>±0.073 | 0.100<br>±0.070  | 0.769<br>±0.037   | 0.059<br>±0.047   |
| Subject23 | $\kappa$ | 0.051<br>±0.041 | 0.021<br>±0.046 | 0.031<br>±0.028 | 0.026<br>±0.031 | 0.015<br>±0.047 | 0.056<br>±0.061 | 0.051<br>±0.031 | 0.046<br>±0.011 | 0.010<br>±0.043 | 0.072<br>±0.021 | 0.026<br>±0.031  | 0.026<br>±0.041 | 0.067<br>±0.023 | 0.041<br>±0.039 | -0.010<br>±0.023 | 0.077<br>±0.075   | 0.010<br>±0.014   |
|           |          | 0.714<br>±0.042 | 0.599<br>±0.057 | 0.644<br>±0.027 | 0.679<br>±0.055 | 0.564<br>±0.068 | 0.647<br>±0.060 | 0.624<br>±0.046 | 0.620<br>±0.052 | 0.534<br>±0.035 | 0.643<br>±0.040 | 0.573<br>±0.072  | 0.601<br>±0.030 | 0.684<br>±0.032 | 0.653<br>±0.036 | 0.519<br>±0.034  | 0.626<br>±0.054   | 0.575<br>±0.061   |
|           | BAcc     | 0.075<br>±0.040 | 0.045<br>±0.045 | 0.055<br>±0.027 | 0.050<br>±0.031 | 0.040<br>±0.045 | 0.080<br>±0.060 | 0.075<br>±0.031 | 0.070<br>±0.011 | 0.035<br>±0.042 | 0.095<br>±0.021 | 0.050<br>±0.031  | 0.050<br>±0.040 | 0.090<br>±0.022 | 0.065<br>±0.038 | 0.015<br>±0.022  | 0.100<br>±0.073   | 0.035<br>±0.014   |
|           |          | 0.075<br>±0.040 | 0.045<br>±0.045 | 0.055<br>±0.027 | 0.050<br>±0.031 | 0.040<br>±0.045 | 0.069<br>±0.077 | 0.056<br>±0.028 | 0.100<br>±0.045 | 0.022<br>±0.026 | 0.078<br>±0.025 | 0.050<br>±0.060  | 0.041<br>±0.042 | 0.113<br>±0.028 | 0.097<br>±0.039 | 0.019<br>±0.034  | 0.091<br>±0.030   | 0.031<br>±0.019   |
|           | Acc.1    | 0.075<br>±0.040 | 0.045<br>±0.045 | 0.055<br>±0.027 | 0.050<br>±0.031 | 0.040<br>±0.045 | 0.069<br>±0.077 | 0.056<br>±0.028 | 0.100<br>±0.045 | 0.022<br>±0.026 | 0.078<br>±0.025 | 0.050<br>±0.060  | 0.041<br>±0.042 | 0.113<br>±0.028 | 0.097<br>±0.039 | 0.019<br>±0.034  | 0.091<br>±0.030   | 0.031<br>±0.019   |

Continued on next page

| Subject   | Metric   | DeepConvnet                    | EEGNet           | Conformer        | CTNet                          | SSVEPDNN                       | BIOT <sup>(1)</sup>            | BIOT <sup>(1)</sup> | BENDR <sup>(f)</sup> | BENDR <sup>(f)</sup> | CBraMod <sup>(f)</sup> | CBraMod <sup>(f)</sup> | EEGPT <sup>(f)</sup> | EEGPT <sup>(f)</sup> | LaBraM <sup>(f)</sup>          | LaBraM <sup>(f)</sup> | STEEGformer-s <sup>(f)</sup>   | STEEGformer-s <sup>(f)</sup> |
|-----------|----------|--------------------------------|------------------|------------------|--------------------------------|--------------------------------|--------------------------------|---------------------|----------------------|----------------------|------------------------|------------------------|----------------------|----------------------|--------------------------------|-----------------------|--------------------------------|------------------------------|
|           | Acc.2    | 0.170<br>± 0.048               | 0.085<br>± 0.052 | 0.150<br>± 0.083 | 0.141<br>± 0.062               | 0.075<br>± 0.050               | 0.116<br>± 0.085               | 0.100<br>± 0.053    | 0.116<br>± 0.059     | 0.031<br>± 0.019     | 0.131<br>± 0.018       | 0.094<br>± 0.082       | 0.109<br>± 0.049     | 0.144<br>± 0.047     | <b>0.169</b><br>± <b>0.066</b> | 0.059<br>± 0.060      | 0.138<br>± 0.066               | 0.069<br>± 0.038             |
| Subject24 | $\kappa$ | 0.133<br>± 0.112               | 0.077<br>± 0.051 | 0.097<br>± 0.042 | 0.162<br>± 0.045               | 0.113<br>± 0.039               | 0.097<br>± 0.049               | 0.077<br>± 0.026    | 0.021<br>± 0.021     | -0.000<br>± 0.026    | 0.067<br>± 0.049       | 0.054<br>± 0.039       | 0.051<br>± 0.041     | 0.103<br>± 0.018     | <b>0.205</b><br>± <b>0.083</b> | 0.000<br>± 0.026      | 0.210<br>± 0.042               | 0.018<br>± 0.019             |
|           | AUC      | 0.784<br>± 0.136               | 0.761<br>± 0.038 | 0.740<br>± 0.043 | 0.808<br>± 0.021               | 0.710<br>± 0.042               | 0.680<br>± 0.020               | 0.684<br>± 0.033    | 0.614<br>± 0.050     | 0.503<br>± 0.044     | 0.687<br>± 0.040       | 0.644<br>± 0.036       | 0.737<br>± 0.080     | 0.737<br>± 0.038     | <b>0.787</b><br>± <b>0.039</b> | 0.555<br>± 0.028      | 0.762<br>± 0.033               | 0.636<br>± 0.040             |
|           | BAcc     | 0.155<br>± 0.110               | 0.100<br>± 0.050 | 0.120<br>± 0.041 | 0.183<br>± 0.044               | 0.135<br>± 0.038               | 0.120<br>± 0.048               | 0.100<br>± 0.025    | 0.045<br>± 0.021     | 0.025<br>± 0.025     | 0.091<br>± 0.048       | 0.078<br>± 0.038       | 0.075<br>± 0.040     | 0.125<br>± 0.018     | <b>0.225</b><br>± <b>0.081</b> | 0.025<br>± 0.025      | 0.230<br>± 0.041               | 0.043<br>± 0.019             |
|           | Acc.1    | 0.155<br>± 0.110               | 0.100<br>± 0.050 | 0.120<br>± 0.041 | 0.135<br>± 0.060               | 0.135<br>± 0.038               | 0.188<br>± 0.062               | 0.119<br>± 0.018    | 0.056<br>± 0.054     | 0.034<br>± 0.036     | 0.121<br>± 0.093       | 0.106<br>± 0.056       | 0.084<br>± 0.071     | 0.134<br>± 0.049     | 0.291<br>± 0.103               | 0.025<br>± 0.032      | <b>0.228</b><br>± <b>0.055</b> | 0.054<br>± 0.028             |
|           | Acc.2    | 0.270<br>± 0.142               | 0.205<br>± 0.072 | 0.200<br>± 0.059 | 0.344<br>± 0.105               | 0.210<br>± 0.096               | 0.275<br>± 0.090               | 0.206<br>± 0.073    | 0.159<br>± 0.060     | 0.047<br>± 0.054     | 0.207<br>± 0.116       | 0.179<br>± 0.054       | 0.122<br>± 0.062     | 0.216<br>± 0.091     | 0.450<br>± 0.095               | 0.072<br>± 0.056      | <b>0.350</b><br>± <b>0.081</b> | 0.092<br>± 0.045             |
|           | $\kappa$ | 0.318<br>± 0.097               | 0.205<br>± 0.051 | 0.113<br>± 0.056 | 0.195<br>± 0.067               | 0.328<br>± 0.066               | 0.272<br>± 0.053               | 0.113<br>± 0.053    | 0.338<br>± 0.056     | 0.021<br>± 0.021     | 0.103<br>± 0.018       | 0.051<br>± 0.031       | 0.041<br>± 0.039     | 0.164<br>± 0.047     | <b>0.344</b><br>± <b>0.034</b> | 0.031<br>± 0.021      | 0.467<br>± 0.088               | 0.062<br>± 0.043             |
| Subject25 | AUC      | <b>0.888</b><br>± <b>0.051</b> | 0.843<br>± 0.030 | 0.773<br>± 0.018 | 0.856<br>± 0.029               | 0.899<br>± 0.019               | 0.816<br>± 0.039               | 0.733<br>± 0.035    | 0.878<br>± 0.033     | 0.634<br>± 0.023     | 0.777<br>± 0.020       | 0.750<br>± 0.010       | 0.670<br>± 0.038     | 0.797<br>± 0.027     | 0.853<br>± 0.020               | 0.604<br>± 0.070      | 0.899<br>± 0.028               | 0.688<br>± 0.030             |
|           | BAcc     | 0.335<br>± 0.095               | 0.225<br>± 0.050 | 0.135<br>± 0.055 | 0.215<br>± 0.065               | 0.345<br>± 0.065               | 0.290<br>± 0.052               | 0.135<br>± 0.052    | 0.355<br>± 0.054     | 0.045<br>± 0.021     | 0.125<br>± 0.018       | 0.075<br>± 0.031       | 0.065<br>± 0.038     | 0.185<br>± 0.045     | <b>0.360</b><br>± <b>0.034</b> | 0.055<br>± 0.021      | 0.480<br>± 0.086               | 0.085<br>± 0.042             |
|           | Acc.1    | 0.335<br>± 0.095               | 0.225<br>± 0.050 | 0.135<br>± 0.055 | 0.209<br>± 0.075               | 0.345<br>± 0.065               | 0.312<br>± 0.089               | 0.169<br>± 0.052    | 0.344<br>± 0.112     | 0.056<br>± 0.032     | 0.172<br>± 0.029       | 0.100<br>± 0.048       | 0.087<br>± 0.049     | 0.200<br>± 0.063     | <b>0.422</b><br>± <b>0.083</b> | 0.062<br>± 0.025      | 0.516<br>± 0.113               | 0.091<br>± 0.040             |
|           | Acc.2    | 0.470<br>± 0.123               | 0.320<br>± 0.086 | 0.240<br>± 0.068 | 0.334<br>± 0.063               | <b>0.510</b><br>± <b>0.119</b> | 0.434<br>± 0.062               | 0.291<br>± 0.088    | 0.456<br>± 0.129     | 0.116<br>± 0.055     | 0.312<br>± 0.106       | 0.216<br>± 0.040       | 0.138<br>± 0.043     | 0.256<br>± 0.092     | 0.487<br>± 0.079               | 0.122<br>± 0.051      | 0.662<br>± 0.069               | 0.153<br>± 0.013             |
|           | $\kappa$ | 0.395<br>± 0.213               | 0.246<br>± 0.059 | 0.282<br>± 0.075 | <b>0.410</b><br>± <b>0.096</b> | 0.241<br>± 0.050               | 0.462<br>± 0.051               | 0.313<br>± 0.058    | 0.282<br>± 0.065     | -0.010<br>± 0.019    | 0.055<br>± 0.050       | 0.038<br>± 0.041       | 0.043<br>± 0.031     | 0.123<br>± 0.073     | 0.282<br>± 0.069               | 0.015<br>± 0.023      | 0.244<br>± 0.049               | -0.005<br>± 0.028            |
|           | AUC      | 0.904<br>± 0.108               | 0.869<br>± 0.043 | 0.901<br>± 0.019 | 0.936<br>± 0.017               | 0.877<br>± 0.030               | <b>0.912</b><br>± <b>0.022</b> | 0.882<br>± 0.018    | 0.890<br>± 0.020     | 0.540<br>± 0.046     | 0.656<br>± 0.020       | 0.677<br>± 0.043       | 0.701<br>± 0.026     | 0.781<br>± 0.049     | 0.826<br>± 0.054               | 0.535<br>± 0.045      | 0.819<br>± 0.037               | 0.579<br>± 0.042             |
| Subject26 | BAcc     | 0.410<br>± 0.208               | 0.265<br>± 0.058 | 0.300<br>± 0.073 | <b>0.425</b><br>± <b>0.094</b> | 0.260<br>± 0.049               | 0.475<br>± 0.050               | 0.330<br>± 0.057    | 0.300<br>± 0.063     | 0.016<br>± 0.019     | 0.079<br>± 0.049       | 0.062<br>± 0.040       | 0.067<br>± 0.030     | 0.145<br>± 0.072     | 0.300<br>± 0.067               | 0.040<br>± 0.022      | 0.263<br>± 0.048               | 0.020<br>± 0.027             |
|           | Acc.1    | 0.410<br>± 0.208               | 0.265<br>± 0.058 | 0.300<br>± 0.073 | <b>0.425</b><br>± <b>0.094</b> | 0.260<br>± 0.049               | 0.466<br>± 0.082               | 0.328<br>± 0.059    | 0.289<br>± 0.076     | 0.010<br>± 0.012     | 0.083<br>± 0.072       | 0.039<br>± 0.025       | 0.065<br>± 0.040     | 0.138<br>± 0.091     | 0.328<br>± 0.089               | 0.034<br>± 0.020      | 0.253<br>± 0.072               | 0.013<br>± 0.017             |
|           | Acc.2    | 0.530<br>± 0.234               | 0.420<br>± 0.093 | 0.455<br>± 0.060 | <b>0.585</b><br>± <b>0.049</b> | 0.430<br>± 0.072               | 0.644<br>± 0.078               | 0.447<br>± 0.053    | 0.482<br>± 0.118     | 0.051<br>± 0.039     | 0.156<br>± 0.069       | 0.064<br>± 0.037       | 0.128<br>± 0.038     | 0.225<br>± 0.085     | 0.424<br>± 0.098               | 0.072<br>± 0.041      | 0.384<br>± 0.101               | 0.044<br>± 0.020             |

Continued on next page



| Subject   | Metric   | DeepConvnet          | EEGNet                      | Conformer            | CTNet                       | SSVEPDNN             | BIOT <sup>(1)</sup>  | BIOT <sup>(1)</sup>  | BENDR <sup>(1)</sup> | BENDR <sup>(1)</sup> | CBraMod <sup>(1)</sup> | CBraMod <sup>(1)</sup> | EEGPT <sup>(1)</sup> | EEGPT <sup>(1)</sup>        | LaBraM <sup>(1)</sup>       | LaBraM <sup>(1)</sup> | STEEGformer-s <sup>(1)</sup> | STEEGformer-s <sup>(1)</sup> |
|-----------|----------|----------------------|-----------------------------|----------------------|-----------------------------|----------------------|----------------------|----------------------|----------------------|----------------------|------------------------|------------------------|----------------------|-----------------------------|-----------------------------|-----------------------|------------------------------|------------------------------|
| Subject27 | $\kappa$ | 0.262<br>$\pm 0.088$ | 0.174<br>$\pm 0.038$        | 0.108<br>$\pm 0.071$ | <b>0.197</b><br>$\pm 0.053$ | 0.021<br>$\pm 0.011$ | 0.108<br>$\pm 0.021$ | 0.087<br>$\pm 0.059$ | 0.179<br>$\pm 0.070$ | 0.006<br>$\pm 0.021$ | 0.040<br>$\pm 0.037$   | 0.030<br>$\pm 0.055$   | 0.036<br>$\pm 0.023$ | 0.108<br>$\pm 0.053$        | 0.144<br>$\pm 0.041$        | 0.010<br>$\pm 0.029$  | 0.151<br>$\pm 0.050$         | 0.011<br>$\pm 0.033$         |
|           | AUC      | 0.875<br>$\pm 0.011$ | 0.779<br>$\pm 0.015$        | 0.712<br>$\pm 0.073$ | <b>0.809</b><br>$\pm 0.027$ | 0.620<br>$\pm 0.047$ | 0.697<br>$\pm 0.032$ | 0.657<br>$\pm 0.039$ | 0.737<br>$\pm 0.026$ | 0.520<br>$\pm 0.051$ | 0.625<br>$\pm 0.032$   | 0.589<br>$\pm 0.027$   | 0.607<br>$\pm 0.045$ | 0.681<br>$\pm 0.073$        | 0.724<br>$\pm 0.026$        | 0.535<br>$\pm 0.039$  | 0.666<br>$\pm 0.033$         | 0.549<br>$\pm 0.040$         |
|           | BAcc     | 0.280<br>$\pm 0.086$ | 0.195<br>$\pm 0.037$        | 0.130<br>$\pm 0.069$ | <b>0.217</b><br>$\pm 0.052$ | 0.045<br>$\pm 0.011$ | 0.130<br>$\pm 0.021$ | 0.110<br>$\pm 0.058$ | 0.200<br>$\pm 0.068$ | 0.031<br>$\pm 0.021$ | 0.064<br>$\pm 0.036$   | 0.054<br>$\pm 0.053$   | 0.060<br>$\pm 0.022$ | 0.130<br>$\pm 0.051$        | 0.166<br>$\pm 0.040$        | 0.035<br>$\pm 0.029$  | 0.172<br>$\pm 0.049$         | 0.036<br>$\pm 0.032$         |
|           | Acc.1    | 0.280<br>$\pm 0.086$ | 0.195<br>$\pm 0.037$        | 0.130<br>$\pm 0.069$ | <b>0.237</b><br>$\pm 0.108$ | 0.045<br>$\pm 0.011$ | 0.119<br>$\pm 0.026$ | 0.069<br>$\pm 0.036$ | 0.184<br>$\pm 0.087$ | 0.030<br>$\pm 0.026$ | 0.076<br>$\pm 0.062$   | 0.057<br>$\pm 0.088$   | 0.075<br>$\pm 0.034$ | 0.119<br>$\pm 0.075$        | 0.174<br>$\pm 0.034$        | 0.050<br>$\pm 0.056$  | 0.181<br>$\pm 0.056$         | 0.022<br>$\pm 0.020$         |
|           | Acc.2    | 0.395<br>$\pm 0.072$ | 0.300<br>$\pm 0.040$        | 0.215<br>$\pm 0.072$ | <b>0.318</b><br>$\pm 0.069$ | 0.095<br>$\pm 0.033$ | 0.169<br>$\pm 0.063$ | 0.122<br>$\pm 0.039$ | 0.264<br>$\pm 0.112$ | 0.064<br>$\pm 0.037$ | 0.122<br>$\pm 0.045$   | 0.102<br>$\pm 0.097$   | 0.113<br>$\pm 0.034$ | 0.172<br>$\pm 0.082$        | 0.299<br>$\pm 0.062$        | 0.084<br>$\pm 0.054$  | 0.255<br>$\pm 0.075$         | 0.042<br>$\pm 0.020$         |
| Subject28 | $\kappa$ | 0.103<br>$\pm 0.048$ | 0.113<br>$\pm 0.069$        | 0.077<br>$\pm 0.026$ | 0.138<br>$\pm 0.074$        | 0.036<br>$\pm 0.034$ | 0.103<br>$\pm 0.051$ | 0.010<br>$\pm 0.029$ | 0.118<br>$\pm 0.047$ | 0.031<br>$\pm 0.033$ | 0.077<br>$\pm 0.033$   | 0.006<br>$\pm 0.018$   | 0.021<br>$\pm 0.033$ | 0.021<br>$\pm 0.049$        | <b>0.133</b><br>$\pm 0.071$ | 0.026<br>$\pm 0.018$  | 0.092<br>$\pm 0.068$         | 0.006<br>$\pm 0.018$         |
|           | AUC      | 0.763<br>$\pm 0.062$ | 0.752<br>$\pm 0.058$        | 0.713<br>$\pm 0.040$ | <b>0.760</b><br>$\pm 0.055$ | 0.663<br>$\pm 0.025$ | 0.689<br>$\pm 0.053$ | 0.626<br>$\pm 0.027$ | 0.689<br>$\pm 0.024$ | 0.569<br>$\pm 0.026$ | 0.676<br>$\pm 0.037$   | 0.602<br>$\pm 0.043$   | 0.595<br>$\pm 0.033$ | 0.667<br>$\pm 0.042$        | 0.705<br>$\pm 0.041$        | 0.589<br>$\pm 0.060$  | 0.659<br>$\pm 0.044$         | 0.642<br>$\pm 0.033$         |
|           | BAcc     | 0.125<br>$\pm 0.047$ | 0.135<br>$\pm 0.068$        | 0.100<br>$\pm 0.025$ | 0.160<br>$\pm 0.072$        | 0.060<br>$\pm 0.034$ | 0.125<br>$\pm 0.050$ | 0.035<br>$\pm 0.029$ | 0.140<br>$\pm 0.045$ | 0.055<br>$\pm 0.033$ | 0.100<br>$\pm 0.032$   | 0.031<br>$\pm 0.018$   | 0.045<br>$\pm 0.033$ | 0.045<br>$\pm 0.048$        | <b>0.155</b><br>$\pm 0.069$ | 0.050<br>$\pm 0.018$  | 0.114<br>$\pm 0.066$         | 0.031<br>$\pm 0.018$         |
|           | Acc.1    | 0.125<br>$\pm 0.047$ | 0.135<br>$\pm 0.068$        | 0.107<br>$\pm 0.037$ | <b>0.175</b><br>$\pm 0.094$ | 0.060<br>$\pm 0.034$ | 0.172<br>$\pm 0.117$ | 0.059<br>$\pm 0.056$ | 0.163<br>$\pm 0.102$ | 0.053<br>$\pm 0.036$ | 0.096<br>$\pm 0.051$   | 0.037<br>$\pm 0.028$   | 0.028<br>$\pm 0.020$ | 0.037<br>$\pm 0.050$        | 0.191<br>$\pm 0.124$        | 0.050<br>$\pm 0.034$  | 0.118<br>$\pm 0.100$         | 0.031<br>$\pm 0.026$         |
|           | Acc.2    | 0.195<br>$\pm 0.078$ | <b>0.250</b><br>$\pm 0.095$ | 0.163<br>$\pm 0.040$ | 0.256<br>$\pm 0.101$        | 0.120<br>$\pm 0.037$ | 0.247<br>$\pm 0.141$ | 0.159<br>$\pm 0.074$ | 0.191<br>$\pm 0.087$ | 0.087<br>$\pm 0.041$ | 0.158<br>$\pm 0.045$   | 0.074<br>$\pm 0.040$   | 0.066<br>$\pm 0.055$ | 0.097<br>$\pm 0.073$        | 0.241<br>$\pm 0.135$        | 0.116<br>$\pm 0.053$  | 0.210<br>$\pm 0.133$         | 0.076<br>$\pm 0.052$         |
| Subject29 | $\kappa$ | 0.051<br>$\pm 0.070$ | 0.041<br>$\pm 0.023$        | 0.026<br>$\pm 0.018$ | 0.011<br>$\pm 0.025$        | 0.021<br>$\pm 0.021$ | 0.031<br>$\pm 0.021$ | 0.005<br>$\pm 0.011$ | 0.035<br>$\pm 0.023$ | 0.013<br>$\pm 0.039$ | 0.021<br>$\pm 0.038$   | 0.036<br>$\pm 0.029$   | 0.015<br>$\pm 0.039$ | <b>0.068</b><br>$\pm 0.060$ | 0.092<br>$\pm 0.050$        | 0.005<br>$\pm 0.021$  | 0.067<br>$\pm 0.039$         | 0.023<br>$\pm 0.031$         |
|           | AUC      | 0.633<br>$\pm 0.042$ | 0.637<br>$\pm 0.030$        | 0.613<br>$\pm 0.033$ | 0.598<br>$\pm 0.031$        | 0.560<br>$\pm 0.023$ | 0.560<br>$\pm 0.037$ | 0.510<br>$\pm 0.033$ | 0.602<br>$\pm 0.027$ | 0.508<br>$\pm 0.078$ | 0.638<br>$\pm 0.047$   | 0.625<br>$\pm 0.020$   | 0.599<br>$\pm 0.040$ | 0.677<br>$\pm 0.041$        | <b>0.653</b><br>$\pm 0.035$ | 0.568<br>$\pm 0.041$  | 0.591<br>$\pm 0.020$         | 0.576<br>$\pm 0.031$         |
|           | BAcc     | 0.075<br>$\pm 0.068$ | 0.065<br>$\pm 0.022$        | 0.050<br>$\pm 0.018$ | 0.036<br>$\pm 0.024$        | 0.045<br>$\pm 0.021$ | 0.055<br>$\pm 0.021$ | 0.030<br>$\pm 0.011$ | 0.059<br>$\pm 0.023$ | 0.037<br>$\pm 0.038$ | 0.045<br>$\pm 0.037$   | 0.060<br>$\pm 0.029$   | 0.040<br>$\pm 0.038$ | <b>0.092</b><br>$\pm 0.058$ | 0.115<br>$\pm 0.049$        | 0.030<br>$\pm 0.021$  | 0.090<br>$\pm 0.038$         | 0.048<br>$\pm 0.030$         |
|           | Acc.1    | 0.075<br>$\pm 0.068$ | 0.065<br>$\pm 0.022$        | 0.050<br>$\pm 0.018$ | 0.042<br>$\pm 0.036$        | 0.045<br>$\pm 0.021$ | 0.072<br>$\pm 0.038$ | 0.028<br>$\pm 0.028$ | 0.061<br>$\pm 0.031$ | 0.023<br>$\pm 0.024$ | 0.037<br>$\pm 0.032$   | 0.056<br>$\pm 0.042$   | 0.062<br>$\pm 0.062$ | <b>0.096</b><br>$\pm 0.069$ | 0.138<br>$\pm 0.094$        | 0.047<br>$\pm 0.037$  | 0.084<br>$\pm 0.045$         | 0.030<br>$\pm 0.019$         |
|           | Acc.2    | 0.120<br>$\pm 0.072$ | 0.110<br>$\pm 0.029$        | 0.100<br>$\pm 0.047$ | 0.085<br>$\pm 0.064$        | 0.085<br>$\pm 0.029$ | 0.091<br>$\pm 0.057$ | 0.041<br>$\pm 0.032$ | 0.105<br>$\pm 0.025$ | 0.041<br>$\pm 0.037$ | 0.113<br>$\pm 0.042$   | 0.097<br>$\pm 0.030$   | 0.100<br>$\pm 0.080$ | <b>0.143</b><br>$\pm 0.079$ | 0.203<br>$\pm 0.069$        | 0.100<br>$\pm 0.046$  | 0.122<br>$\pm 0.037$         | 0.062<br>$\pm 0.038$         |
| Subject3  | $\kappa$ | 0.436<br>$\pm 0.288$ | 0.482<br>$\pm 0.080$        | 0.472<br>$\pm 0.064$ | 0.604<br>$\pm 0.039$        | 0.379<br>$\pm 0.084$ | 0.646<br>$\pm 0.066$ | 0.451<br>$\pm 0.097$ | 0.673<br>$\pm 0.068$ | 0.023<br>$\pm 0.037$ | 0.071<br>$\pm 0.038$   | 0.071<br>$\pm 0.038$   | 0.390<br>$\pm 0.080$ | 0.462<br>$\pm 0.139$        | <b>0.648</b><br>$\pm 0.059$ | -0.000<br>$\pm 0.018$ | 0.538<br>$\pm 0.081$         | 0.044<br>$\pm 0.041$         |

Continued on next page

| Subject   | Metric   | DeepConvnet | EEGNet      | Conformer   | CTNet        | SSVEPDNN    | BIOT <sup>(1)</sup> | BIOT <sup>(1)</sup> | BENDR <sup>(f)</sup> | BENDR <sup>(f)</sup> | CBraMod <sup>(f)</sup> | CBraMod <sup>(f)</sup> | EEGPT <sup>(f)</sup> | EEGPT <sup>(f)</sup> | LaBraM <sup>(f)</sup> | LaBraM <sup>(f)</sup> | STEEGformer-s <sup>(f)</sup> | STEEGformer-s <sup>(f)</sup> |
|-----------|----------|-------------|-------------|-------------|--------------|-------------|---------------------|---------------------|----------------------|----------------------|------------------------|------------------------|----------------------|----------------------|-----------------------|-----------------------|------------------------------|------------------------------|
|           | AUC      | 0.902       | 0.959       | 0.957       | <b>0.976</b> | 0.920       | 0.956               | 0.941               | 0.976                | 0.592                | 0.686                  | 0.671                  | 0.879                | 0.948                | 0.955                 | 0.567                 | 0.936                        | 0.641                        |
|           |          | $\pm 0.137$ | $\pm 0.027$ | $\pm 0.022$ | $\pm 0.006$  | $\pm 0.033$ | $\pm 0.013$         | $\pm 0.032$         | $\pm 0.010$          | $\pm 0.074$          | $\pm 0.030$            | $\pm 0.034$            | $\pm 0.030$          | $\pm 0.028$          | $\pm 0.020$           | $\pm 0.048$           | $\pm 0.025$                  | $\pm 0.021$                  |
|           | BAcc     | 0.450       | 0.495       | 0.485       | 0.614        | 0.395       | 0.655               | 0.465               | 0.681                | 0.047                | 0.094                  | 0.094                  | 0.405                | 0.475                | <b>0.657</b>          | 0.025                 | 0.550                        | 0.068                        |
|           |          | $\pm 0.281$ | $\pm 0.078$ | $\pm 0.063$ | $\pm 0.038$  | $\pm 0.082$ | $\pm 0.065$         | $\pm 0.095$         | $\pm 0.066$          | $\pm 0.036$          | $\pm 0.037$            | $\pm 0.037$            | $\pm 0.078$          | $\pm 0.136$          | $\pm 0.057$           | $\pm 0.018$           | $\pm 0.079$                  | $\pm 0.040$                  |
|           | Acc.1    | 0.450       | 0.495       | 0.485       | 0.590        | 0.395       | 0.672               | 0.469               | 0.695                | 0.030                | 0.100                  | 0.129                  | 0.478                | 0.512                | <b>0.692</b>          | 0.053                 | 0.541                        | 0.076                        |
|           |          | $\pm 0.281$ | $\pm 0.078$ | $\pm 0.063$ | $\pm 0.090$  | $\pm 0.082$ | $\pm 0.049$         | $\pm 0.090$         | $\pm 0.060$          | $\pm 0.023$          | $\pm 0.059$            | $\pm 0.059$            | $\pm 0.089$          | $\pm 0.167$          | $\pm 0.072$           | $\pm 0.049$           | $\pm 0.069$                  | $\pm 0.047$                  |
|           | Acc.2    | 0.605       | 0.715       | 0.680       | 0.787        | 0.570       | 0.797               | 0.631               | 0.850                | 0.071                | 0.236                  | 0.213                  | 0.566                | 0.662                | <b>0.839</b>          | 0.113                 | 0.719                        | 0.105                        |
|           |          | $\pm 0.314$ | $\pm 0.049$ | $\pm 0.099$ | $\pm 0.069$  | $\pm 0.067$ | $\pm 0.072$         | $\pm 0.089$         | $\pm 0.043$          | $\pm 0.047$          | $\pm 0.056$            | $\pm 0.079$            | $\pm 0.102$          | $\pm 0.155$          | $\pm 0.058$           | $\pm 0.082$           | $\pm 0.055$                  | $\pm 0.046$                  |
|           | $\kappa$ | 0.108       | 0.113       | 0.097       | 0.174        | 0.087       | 0.190               | 0.113               | 0.174                | -0.010               | 0.031                  | 0.015                  | 0.082                | 0.056                | <b>0.185</b>          | 0.010                 | 0.113                        | 0.015                        |
|           |          | $\pm 0.084$ | $\pm 0.067$ | $\pm 0.061$ | $\pm 0.058$  | $\pm 0.039$ | $\pm 0.078$         | $\pm 0.084$         | $\pm 0.073$          | $\pm 0.014$          | $\pm 0.021$            | $\pm 0.023$            | $\pm 0.058$          | $\pm 0.049$          | $\pm 0.049$           | $\pm 0.023$           | $\pm 0.050$                  | $\pm 0.013$                  |
| Subject30 | AUC      | 0.748       | 0.762       | 0.725       | 0.818        | 0.709       | 0.766               | 0.709               | <b>0.786</b>         | 0.548                | 0.624                  | 0.579                  | 0.672                | 0.705                | 0.762                 | 0.515                 | 0.676                        | 0.550                        |
|           |          | $\pm 0.069$ | $\pm 0.024$ | $\pm 0.036$ | $\pm 0.038$  | $\pm 0.031$ | $\pm 0.025$         | $\pm 0.063$         | $\pm 0.071$          | $\pm 0.035$          | $\pm 0.035$            | $\pm 0.049$            | $\pm 0.065$          | $\pm 0.029$          | $\pm 0.022$           | $\pm 0.051$           | $\pm 0.012$                  | $\pm 0.038$                  |
|           | BAcc     | 0.130       | 0.135       | 0.120       | 0.195        | 0.110       | 0.210               | 0.135               | 0.195                | 0.015                | 0.055                  | 0.040                  | 0.105                | 0.080                | <b>0.205</b>          | 0.035                 | 0.135                        | 0.040                        |
|           |          | $\pm 0.082$ | $\pm 0.065$ | $\pm 0.060$ | $\pm 0.057$  | $\pm 0.038$ | $\pm 0.076$         | $\pm 0.082$         | $\pm 0.072$          | $\pm 0.014$          | $\pm 0.021$            | $\pm 0.022$            | $\pm 0.057$          | $\pm 0.048$          | $\pm 0.048$           | $\pm 0.022$           | $\pm 0.049$                  | $\pm 0.013$                  |
|           | Acc.1    | 0.130       | 0.135       | 0.120       | 0.195        | 0.110       | <b>0.234</b>        | 0.150               | 0.225                | 0.019                | 0.053                  | 0.044                  | 0.141                | 0.059                | 0.241                 | 0.059                 | 0.141                        | 0.044                        |
|           |          | $\pm 0.082$ | $\pm 0.065$ | $\pm 0.060$ | $\pm 0.057$  | $\pm 0.038$ | $\pm 0.074$         | $\pm 0.146$         | $\pm 0.071$          | $\pm 0.026$          | $\pm 0.032$            | $\pm 0.055$            | $\pm 0.080$          | $\pm 0.036$          | $\pm 0.081$           | $\pm 0.051$           | $\pm 0.058$                  | $\pm 0.030$                  |
| Subject31 | AUC      | 0.180       | 0.220       | 0.205       | 0.305        | 0.170       | <b>0.331</b>        | 0.219               | 0.300                | 0.050                | 0.184                  | 0.062                  | 0.212                | 0.131                | 0.362                 | 0.091                 | 0.206                        | 0.122                        |
|           |          | $\pm 0.127$ | $\pm 0.086$ | $\pm 0.084$ | $\pm 0.054$  | $\pm 0.021$ | $\pm 0.098$         | $\pm 0.137$         | $\pm 0.142$          | $\pm 0.034$          | $\pm 0.060$            | $\pm 0.047$            | $\pm 0.116$          | $\pm 0.039$          | $\pm 0.056$           | $\pm 0.076$           | $\pm 0.040$                  | $\pm 0.034$                  |
|           | BAcc     | 0.154       | 0.067       | 0.144       | <b>0.205</b> | 0.067       | 0.087               | 0.051               | 0.149                | 0.000                | 0.062                  | 0.000                  | 0.092                | 0.107                | 0.159                 | -0.015                | 0.231                        | 0.029                        |
|           |          | $\pm 0.099$ | $\pm 0.043$ | $\pm 0.053$ | $\pm 0.031$  | $\pm 0.047$ | $\pm 0.039$         | $\pm 0.048$         | $\pm 0.033$          | $\pm 0.018$          | $\pm 0.049$            | $\pm 0.019$            | $\pm 0.069$          | $\pm 0.025$          | $\pm 0.066$           | $\pm 0.014$           | $\pm 0.056$                  | $\pm 0.025$                  |
|           | Acc.1    | 0.175       | 0.090       | 0.165       | <b>0.225</b> | 0.090       | 0.110               | 0.075               | 0.170                | 0.025                | 0.086                  | 0.025                  | 0.115                | 0.129                | 0.180                 | 0.010                 | 0.250                        | 0.053                        |
|           |          | $\pm 0.097$ | $\pm 0.042$ | $\pm 0.052$ | $\pm 0.031$  | $\pm 0.045$ | $\pm 0.038$         | $\pm 0.047$         | $\pm 0.033$          | $\pm 0.018$          | $\pm 0.048$            | $\pm 0.019$            | $\pm 0.068$          | $\pm 0.025$          | $\pm 0.065$           | $\pm 0.014$           | $\pm 0.055$                  | $\pm 0.025$                  |
| Subject32 | AUC      | 0.175       | 0.090       | 0.159       | <b>0.225</b> | 0.090       | 0.153               | 0.047               | 0.172                | 0.016                | 0.074                  | 0.027                  | 0.138                | 0.151                | 0.197                 | 0.006                 | 0.312                        | 0.070                        |
|           |          | $\pm 0.097$ | $\pm 0.042$ | $\pm 0.078$ | $\pm 0.034$  | $\pm 0.045$ | $\pm 0.058$         | $\pm 0.029$         | $\pm 0.067$          | $\pm 0.011$          | $\pm 0.049$            | $\pm 0.029$            | $\pm 0.091$          | $\pm 0.037$          | $\pm 0.069$           | $\pm 0.009$           | $\pm 0.089$                  | $\pm 0.037$                  |
|           | Acc.2    | 0.265       | 0.200       | 0.263       | <b>0.322</b> | 0.160       | 0.225               | 0.150               | 0.259                | 0.050                | 0.154                  | 0.039                  | 0.194                | 0.258                | 0.294                 | 0.044                 | 0.365                        | 0.107                        |
|           |          | $\pm 0.088$ | $\pm 0.079$ | $\pm 0.113$ | $\pm 0.085$  | $\pm 0.060$ | $\pm 0.057$         | $\pm 0.103$         | $\pm 0.059$          | $\pm 0.034$          | $\pm 0.070$            | $\pm 0.029$            | $\pm 0.083$          | $\pm 0.084$          | $\pm 0.071$           | $\pm 0.037$           | $\pm 0.079$                  | $\pm 0.062$                  |
|           | $\kappa$ | 0.446       | 0.497       | 0.631       | 0.749        | 0.662       | 0.677               | 0.451               | <b>0.703</b>         | 0.041                | 0.123                  | 0.067                  | 0.344                | 0.426                | 0.692                 | 0.031                 | 0.551                        | 0.041                        |
|           |          | $\pm 0.305$ | $\pm 0.152$ | $\pm 0.084$ | $\pm 0.058$  | $\pm 0.046$ | $\pm 0.062$         | $\pm 0.082$         | $\pm 0.074$          | $\pm 0.047$          | $\pm 0.066$            | $\pm 0.023$            | $\pm 0.062$          | $\pm 0.059$          | $\pm 0.081$           | $\pm 0.011$           | $\pm 0.096$                  | $\pm 0.053$                  |
|           | AUC      | 0.933       | 0.970       | 0.979       | 0.988        | 0.975       | 0.975               | 0.950               | <b>0.987</b>         | 0.572                | 0.688                  | 0.712                  | 0.893                | 0.940                | 0.961                 | 0.592                 | 0.951                        | 0.688                        |
|           |          | $\pm 0.086$ | $\pm 0.015$ | $\pm 0.010$ | $\pm 0.008$  | $\pm 0.014$ | $\pm 0.024$         | $\pm 0.020$         | $\pm 0.007$          | $\pm 0.061$          | $\pm 0.040$            | $\pm 0.021$            | $\pm 0.016$          | $\pm 0.017$          | $\pm 0.019$           | $\pm 0.051$           | $\pm 0.022$                  | $\pm 0.042$                  |

Continued on next page

| Subject   | Metric   | DeepConvnet            | EEGNet          | Conformer              | CTNet                  | SSVEPDNN        | BIOT <sup>(1)</sup>    | BIOT <sup>(1)</sup> | BENDR <sup>(f)</sup>   | BENDR <sup>(f)</sup> | CBraMod <sup>(f)</sup> | CBraMod <sup>(f)</sup> | EEGPT <sup>(f)</sup> | EEGPT <sup>(f)</sup> | LaBraM <sup>(f)</sup>  | LaBraM <sup>(f)</sup> | STEEGformer-s <sup>(f)</sup> | STEEGformer-s <sup>(f)</sup> |
|-----------|----------|------------------------|-----------------|------------------------|------------------------|-----------------|------------------------|---------------------|------------------------|----------------------|------------------------|------------------------|----------------------|----------------------|------------------------|-----------------------|------------------------------|------------------------------|
| Subject32 | BAcc     | 0.460<br>±0.297        | 0.510<br>±0.149 | 0.640<br>±0.082        | 0.755<br>±0.057        | 0.670<br>±0.045 | 0.685<br>±0.060        | 0.465<br>±0.080     | <b>0.710</b><br>±0.072 | 0.065<br>±0.045      | 0.145<br>±0.065        | 0.090<br>±0.022        | 0.360<br>±0.060      | 0.440<br>±0.058      | 0.700<br>±0.079        | 0.055<br>±0.011       | 0.562<br>±0.093              | 0.065<br>±0.052              |
|           | Acc.1    | 0.460<br>±0.297        | 0.510<br>±0.149 | 0.616<br>±0.094        | 0.781<br>±0.016        | 0.670<br>±0.045 | <b>0.709</b><br>±0.089 | 0.478<br>±0.093     | 0.706<br>±0.058        | 0.050<br>±0.042      | 0.156<br>±0.106        | 0.131<br>±0.053        | 0.403<br>±0.084      | 0.491<br>±0.080      | 0.700<br>±0.093        | 0.053<br>±0.030       | 0.586<br>±0.056              | 0.041<br>±0.032              |
|           | Acc.2    | 0.590<br>±0.309        | 0.700<br>±0.121 | 0.778<br>±0.093        | <b>0.900</b><br>±0.042 | 0.810<br>±0.060 | 0.909<br>±0.058        | 0.716<br>±0.073     | 0.869<br>±0.045        | 0.084<br>±0.055      | 0.253<br>±0.068        | 0.203<br>±0.073        | 0.522<br>±0.085      | 0.644<br>±0.058      | 0.853<br>±0.073        | 0.069<br>±0.045       | 0.740<br>±0.088              | 0.062<br>±0.029              |
|           | $\kappa$ | 0.190<br>±0.201        | 0.297<br>±0.023 | 0.256<br>±0.077        | 0.400<br>±0.059        | 0.215<br>±0.039 | 0.390<br>±0.095        | 0.190<br>±0.056     | 0.477<br>±0.102        | 0.051<br>±0.054      | 0.103<br>±0.051        | -0.005<br>±0.033       | 0.113<br>±0.047      | 0.159<br>±0.080      | 0.441<br>±0.073        | 0.031<br>±0.046       | <b>0.477</b><br>±0.056       | 0.005<br>±0.033              |
|           | AUC      | 0.825<br>±0.111        | 0.899<br>±0.013 | 0.871<br>±0.037        | <b>0.923</b><br>±0.019 | 0.844<br>±0.032 | 0.870<br>±0.038        | 0.832<br>±0.030     | 0.934<br>±0.016        | 0.605<br>±0.082      | 0.737<br>±0.052        | 0.608<br>±0.054        | 0.703<br>±0.068      | 0.782<br>±0.048      | 0.888<br>±0.026        | 0.903<br>±0.045       | 0.903<br>±0.018              | 0.646<br>±0.017              |
|           | BAcc     | 0.210<br>±0.196        | 0.315<br>±0.022 | 0.275<br>±0.075        | 0.415<br>±0.058        | 0.235<br>±0.038 | 0.405<br>±0.093        | 0.210<br>±0.055     | 0.490<br>±0.099        | 0.075<br>±0.053      | 0.125<br>±0.050        | 0.020<br>±0.033        | 0.135<br>±0.045      | 0.180<br>±0.078      | <b>0.455</b><br>±0.072 | 0.055<br>±0.045       | 0.490<br>±0.055              | 0.030<br>±0.033              |
| Subject33 | Acc.1    | 0.210<br>±0.196        | 0.315<br>±0.022 | 0.247<br>±0.104        | 0.438<br>±0.082        | 0.235<br>±0.038 | 0.384<br>±0.107        | 0.197<br>±0.055     | 0.450<br>±0.127        | 0.075<br>±0.071      | 0.097<br>±0.059        | 0.022<br>±0.041        | 0.141<br>±0.043      | 0.169<br>±0.093      | <b>0.472</b><br>±0.095 | 0.072<br>±0.045       | 0.503<br>±0.078              | 0.037<br>±0.059              |
|           | Acc.2    | 0.335<br>±0.280        | 0.495<br>±0.045 | 0.403<br>±0.107        | 0.569<br>±0.110        | 0.375<br>±0.073 | 0.537<br>±0.097        | 0.347<br>±0.088     | 0.597<br>±0.156        | 0.109<br>±0.072      | 0.188<br>±0.057        | 0.062<br>±0.040        | 0.181<br>±0.065      | 0.278<br>±0.073      | <b>0.603</b><br>±0.046 | 0.091<br>±0.020       | 0.622<br>±0.078              | 0.066<br>±0.052              |
| Subject34 | $\kappa$ | 0.385<br>±0.101        | 0.272<br>±0.113 | 0.287<br>±0.066        | 0.333<br>±0.075        | 0.169<br>±0.069 | 0.123<br>±0.049        | 0.087<br>±0.047     | <b>0.374</b><br>±0.076 | 0.005<br>±0.021      | 0.103<br>±0.041        | 0.026<br>±0.031        | 0.064<br>±0.035      | 0.169<br>±0.104      | 0.272<br>±0.034        | -0.005<br>±0.011      | 0.251<br>±0.038              | 0.031<br>±0.028              |
|           | AUC      | 0.911<br>±0.047        | 0.875<br>±0.040 | 0.831<br>±0.037        | 0.865<br>±0.032        | 0.788<br>±0.041 | 0.719<br>±0.033        | 0.680<br>±0.035     | <b>0.902</b><br>±0.020 | 0.540<br>±0.052      | 0.666<br>±0.037        | 0.555<br>±0.050        | 0.675<br>±0.040      | 0.817<br>±0.022      | 0.796<br>±0.023        | 0.466<br>±0.066       | 0.769<br>±0.042              | 0.542<br>±0.027              |
|           | BAcc     | 0.400<br>±0.098        | 0.290<br>±0.110 | 0.305<br>±0.065        | 0.350<br>±0.073        | 0.190<br>±0.068 | 0.145<br>±0.048        | 0.110<br>±0.045     | <b>0.390</b><br>±0.074 | 0.030<br>±0.021      | 0.125<br>±0.040        | 0.050<br>±0.031        | 0.088<br>±0.034      | 0.190<br>±0.101      | 0.290<br>±0.034        | 0.020<br>±0.011       | 0.270<br>±0.037              | 0.055<br>±0.027              |
|           | Acc.1    | 0.400<br>±0.098        | 0.290<br>±0.110 | 0.305<br>±0.065        | 0.331<br>±0.065        | 0.190<br>±0.068 | 0.184<br>±0.087        | 0.125<br>±0.069     | <b>0.384</b><br>±0.118 | 0.019<br>±0.013      | 0.163<br>±0.060        | 0.041<br>±0.028        | 0.109<br>±0.065      | 0.212<br>±0.118      | 0.359<br>±0.038        | 0.013<br>±0.007       | 0.328<br>±0.046              | 0.044<br>±0.026              |
|           | Acc.2    | <b>0.505</b><br>±0.104 | 0.455<br>±0.102 | 0.420<br>±0.093        | 0.472<br>±0.074        | 0.285<br>±0.076 | 0.256<br>±0.062        | 0.244<br>±0.044     | 0.528<br>±0.051        | 0.056<br>±0.042      | 0.234<br>±0.049        | 0.069<br>±0.041        | 0.167<br>±0.032      | 0.334<br>±0.113      | 0.447<br>±0.074        | 0.037<br>±0.026       | 0.466<br>±0.113              | 0.062<br>±0.025              |
|           | $\kappa$ | 0.215<br>±0.097        | 0.138<br>±0.039 | 0.246<br>±0.034        | <b>0.277</b><br>±0.066 | 0.215<br>±0.062 | 0.185<br>±0.021        | 0.103<br>±0.063     | 0.277<br>±0.076        | 0.041<br>±0.043      | 0.108<br>±0.058        | 0.046<br>±0.021        | 0.077<br>±0.054      | 0.092<br>±0.047      | 0.174<br>±0.033        | 0.051<br>±0.048       | 0.231<br>±0.070              | 0.015<br>±0.029              |
| Subject35 | AUC      | 0.836<br>±0.067        | 0.830<br>±0.059 | 0.839<br>±0.022        | <b>0.854</b><br>±0.038 | 0.833<br>±0.047 | 0.721<br>±0.079        | 0.727<br>±0.032     | 0.874<br>±0.052        | 0.647<br>±0.038      | 0.681<br>±0.046        | 0.633<br>±0.019        | 0.677<br>±0.065      | 0.721<br>±0.039      | 0.788<br>±0.037        | 0.591<br>±0.039       | 0.766<br>±0.028              | 0.603<br>±0.079              |
|           | BAcc     | 0.235<br>±0.095        | 0.160<br>±0.038 | <b>0.265</b><br>±0.034 | 0.295<br>±0.065        | 0.235<br>±0.060 | 0.205<br>±0.021        | 0.125<br>±0.061     | 0.295<br>±0.074        | 0.065<br>±0.042      | 0.130<br>±0.057        | 0.070<br>±0.021        | 0.100<br>±0.053      | 0.115<br>±0.045      | 0.137<br>±0.033        | 0.075<br>±0.047       | 0.250<br>±0.068              | 0.040<br>±0.029              |

Continued on next page

| Subject  | Metric   | DeepConvnet  | EEGNet      | Conformer   | CTNet        | SSVEPDNN    | BIOT <sup>(1)</sup> | BIOT <sup>(1)</sup> | BENDR <sup>(f)</sup> | BENDR <sup>(f)</sup> | CBraMod <sup>(f)</sup> | CBraMod <sup>(f)</sup> | EEGPT <sup>(f)</sup> | EEGPT <sup>(f)</sup> | LaBraM <sup>(f)</sup> | LaBraM <sup>(f)</sup> | STEEGformer-s <sup>(f)</sup> | STEEGformer-s <sup>(f)</sup> |
|----------|----------|--------------|-------------|-------------|--------------|-------------|---------------------|---------------------|----------------------|----------------------|------------------------|------------------------|----------------------|----------------------|-----------------------|-----------------------|------------------------------|------------------------------|
| Subject4 | Acc.1    | 0.235        | 0.160       | 0.241       | 0.306        | 0.235       | 0.222               | 0.106               | 0.287                | 0.078                | 0.175                  | 0.091                  | 0.128                | 0.119                | 0.197                 | 0.084                 | <b>0.297</b>                 | 0.044                        |
|          |          | $\pm 0.095$  | $\pm 0.038$ | $\pm 0.034$ | $\pm 0.060$  | $\pm 0.060$ | $\pm 0.078$         | $\pm 0.076$         | $\pm 0.121$          | $\pm 0.059$          | $\pm 0.091$            | $\pm 0.049$            | $\pm 0.063$          | $\pm 0.061$          | $\pm 0.056$           | $\pm 0.053$           | $\pm 0.147$                  | $\pm 0.040$                  |
|          | Acc.2    | 0.355        | 0.285       | 0.338       | 0.359        | 0.355       | 0.294               | 0.166               | 0.431                | 0.125                | 0.275                  | 0.116                  | 0.216                | 0.222                | 0.294                 | 0.094                 | <b>0.400</b>                 | 0.100                        |
|          |          | $\pm 0.105$  | $\pm 0.113$ | $\pm 0.046$ | $\pm 0.053$  | $\pm 0.033$ | $\pm 0.106$         | $\pm 0.048$         | $\pm 0.136$          | $\pm 0.059$          | $\pm 0.114$            | $\pm 0.034$            | $\pm 0.050$          | $\pm 0.084$          | $\pm 0.057$           | $\pm 0.051$           | $\pm 0.107$                  | $\pm 0.097$                  |
|          | $\kappa$ | 0.185        | 0.118       | 0.082       | <b>0.185</b> | 0.092       | 0.159               | 0.082               | 0.159                | -0.005               | 0.010                  | 0.021                  | 0.031                | 0.026                | 0.210                 | 0.021                 | 0.164                        | -0.000                       |
|          | AUC      | $\pm 0.056$  | $\pm 0.056$ | $\pm 0.056$ | $\pm 0.049$  | $\pm 0.023$ | $\pm 0.105$         | $\pm 0.053$         | $\pm 0.042$          | $\pm 0.021$          | $\pm 0.034$            | $\pm 0.042$            | $\pm 0.042$          | $\pm 0.044$          | $\pm 0.071$           | $\pm 0.021$           | $\pm 0.097$                  | $\pm 0.026$                  |
| Subject5 | Acc.1    | 0.809        | 0.769       | 0.711       | <b>0.800</b> | 0.687       | 0.726               | 0.730               | 0.740                | 0.522                | 0.573                  | 0.571                  | 0.655                | 0.666                | 0.781                 | 0.500                 | 0.725                        | 0.509                        |
|          |          | $\pm 0.031$  | $\pm 0.012$ | $\pm 0.026$ | $\pm 0.030$  | $\pm 0.046$ | $\pm 0.076$         | $\pm 0.040$         | $\pm 0.034$          | $\pm 0.068$          | $\pm 0.017$            | $\pm 0.025$            | $\pm 0.073$          | $\pm 0.029$          | $\pm 0.053$           | $\pm 0.052$           | $\pm 0.074$                  | $\pm 0.022$                  |
|          | BAcc     | <b>0.205</b> | 0.140       | 0.105       | <b>0.205</b> | 0.115       | 0.180               | 0.105               | 0.180                | 0.020                | 0.035                  | 0.045                  | 0.055                | 0.050                | 0.230                 | 0.045                 | 0.185                        | 0.025                        |
|          |          | $\pm 0.054$  | $\pm 0.055$ | $\pm 0.054$ | $\pm 0.048$  | $\pm 0.022$ | $\pm 0.102$         | $\pm 0.051$         | $\pm 0.041$          | $\pm 0.021$          | $\pm 0.034$            | $\pm 0.041$            | $\pm 0.041$          | $\pm 0.043$          | $\pm 0.069$           | $\pm 0.021$           | $\pm 0.095$                  | $\pm 0.025$                  |
|          | Acc.2    | 0.205        | 0.149       | 0.103       | 0.212        | 0.115       | <b>0.216</b>        | 0.141               | <b>0.216</b>         | 0.022                | 0.050                  | 0.037                  | 0.053                | 0.031                | 0.275                 | 0.047                 | 0.191                        | 0.025                        |
|          |          | $\pm 0.054$  | $\pm 0.102$ | $\pm 0.053$ | $\pm 0.060$  | $\pm 0.022$ | $\pm 0.108$         | $\pm 0.103$         | $\pm 0.053$          | $\pm 0.026$          | $\pm 0.060$            | $\pm 0.039$            | $\pm 0.061$          | $\pm 0.027$          | $\pm 0.102$           | $\pm 0.025$           | $\pm 0.084$                  | $\pm 0.026$                  |
| Subject6 | Acc.1    | 0.335        | 0.251       | 0.231       | <b>0.353</b> | 0.190       | 0.331               | 0.259               | 0.316                | 0.037                | 0.075                  | 0.047                  | 0.134                | 0.094                | 0.381                 | 0.091                 | 0.312                        | 0.053                        |
|          |          | $\pm 0.065$  | $\pm 0.076$ | $\pm 0.062$ | $\pm 0.053$  | $\pm 0.034$ | $\pm 0.149$         | $\pm 0.067$         | $\pm 0.040$          | $\pm 0.026$          | $\pm 0.053$            | $\pm 0.031$            | $\pm 0.123$          | $\pm 0.016$          | $\pm 0.103$           | $\pm 0.020$           | $\pm 0.102$                  | $\pm 0.045$                  |
|          | $\kappa$ | 0.595        | 0.513       | 0.549       | 0.697        | 0.400       | 0.733               | 0.554               | <b>0.721</b>         | 0.026                | 0.092                  | 0.051                  | 0.410                | 0.487                | 0.646                 | 0.015                 | 0.621                        | 0.046                        |
|          |          | $\pm 0.206$  | $\pm 0.118$ | $\pm 0.104$ | $\pm 0.106$  | $\pm 0.053$ | $\pm 0.064$         | $\pm 0.078$         | $\pm 0.067$          | $\pm 0.043$          | $\pm 0.039$            | $\pm 0.026$            | $\pm 0.073$          | $\pm 0.075$          | $\pm 0.102$           | $\pm 0.039$           | $\pm 0.066$                  | $\pm 0.033$                  |
|          | AUC      | 0.975        | 0.960       | 0.971       | <b>0.984</b> | 0.910       | 0.974               | 0.961               | 0.987                | 0.625                | 0.754                  | 0.654                  | 0.913                | 0.953                | 0.974                 | 0.560                 | 0.950                        | 0.607                        |
|          |          | $\pm 0.028$  | $\pm 0.020$ | $\pm 0.007$ | $\pm 0.008$  | $\pm 0.021$ | $\pm 0.013$         | $\pm 0.019$         | $\pm 0.010$          | $\pm 0.031$          | $\pm 0.024$            | $\pm 0.008$            | $\pm 0.021$          | $\pm 0.019$          | $\pm 0.015$           | $\pm 0.018$           | $\pm 0.027$                  | $\pm 0.025$                  |
| Subject7 | BAcc     | 0.605        | 0.525       | 0.560       | 0.705        | 0.415       | 0.740               | 0.565               | <b>0.728</b>         | 0.050                | 0.115                  | 0.075                  | 0.425                | 0.500                | 0.655                 | 0.040                 | 0.630                        | 0.070                        |
|          |          | $\pm 0.201$  | $\pm 0.115$ | $\pm 0.101$ | $\pm 0.104$  | $\pm 0.052$ | $\pm 0.063$         | $\pm 0.076$         | $\pm 0.065$          | $\pm 0.042$          | $\pm 0.038$            | $\pm 0.025$            | $\pm 0.071$          | $\pm 0.073$          | $\pm 0.099$           | $\pm 0.038$           | $\pm 0.065$                  | $\pm 0.033$                  |
|          | Acc.1    | 0.605        | 0.525       | 0.560       | 0.705        | 0.415       | 0.762               | 0.550               | <b>0.740</b>         | 0.043                | 0.109                  | 0.075                  | 0.463                | 0.537                | 0.691                 | 0.044                 | 0.675                        | 0.091                        |
|          |          | $\pm 0.201$  | $\pm 0.115$ | $\pm 0.101$ | $\pm 0.104$  | $\pm 0.052$ | $\pm 0.060$         | $\pm 0.095$         | $\pm 0.129$          | $\pm 0.042$          | $\pm 0.082$            | $\pm 0.036$            | $\pm 0.070$          | $\pm 0.087$          | $\pm 0.102$           | $\pm 0.043$           | $\pm 0.062$                  | $\pm 0.020$                  |
|          | Acc.2    | 0.755        | 0.725       | 0.730       | <b>0.885</b> | 0.550       | 0.891               | 0.728               | 0.859                | 0.082                | 0.209                  | 0.156                  | 0.603                | 0.678                | 0.859                 | 0.116                 | 0.797                        | 0.128                        |
|          |          | $\pm 0.244$  | $\pm 0.120$ | $\pm 0.054$ | $\pm 0.029$  | $\pm 0.073$ | $\pm 0.061$         | $\pm 0.095$         | $\pm 0.089$          | $\pm 0.042$          | $\pm 0.053$            | $\pm 0.049$            | $\pm 0.083$          | $\pm 0.089$          | $\pm 0.049$           | $\pm 0.039$           | $\pm 0.073$                  | $\pm 0.045$                  |
| Subject8 | $\kappa$ | 0.528        | 0.338       | 0.482       | 0.538        | 0.236       | 0.441               | 0.221               | 0.467                | 0.015                | 0.097                  | 0.031                  | 0.195                | 0.282                | <b>0.559</b>          | 0.021                 | 0.574                        | 0.007                        |
|          |          | $\pm 0.086$  | $\pm 0.066$ | $\pm 0.080$ | $\pm 0.041$  | $\pm 0.144$ | $\pm 0.058$         | $\pm 0.023$         | $\pm 0.049$          | $\pm 0.029$          | $\pm 0.058$            | $\pm 0.048$            | $\pm 0.059$          | $\pm 0.065$          | $\pm 0.056$           | $\pm 0.033$           | $\pm 0.052$                  | $\pm 0.013$                  |
|          | AUC      | 0.980        | 0.954       | 0.959       | <b>0.969</b> | 0.788       | 0.925               | 0.870               | 0.925                | 0.529                | 0.699                  | 0.654                  | 0.793                | 0.897                | 0.930                 | 0.532                 | 0.936                        | 0.637                        |
|          |          | $\pm 0.009$  | $\pm 0.016$ | $\pm 0.016$ | $\pm 0.009$  | $\pm 0.171$ | $\pm 0.028$         | $\pm 0.015$         | $\pm 0.008$          | $\pm 0.031$          | $\pm 0.017$            | $\pm 0.022$            | $\pm 0.030$          | $\pm 0.016$          | $\pm 0.037$           | $\pm 0.055$           | $\pm 0.017$                  | $\pm 0.033$                  |
|          | BAcc     | 0.540        | 0.355       | 0.495       | 0.550        | 0.255       | 0.455               | 0.240               | 0.480                | 0.040                | 0.120                  | 0.056                  | 0.215                | 0.300                | <b>0.570</b>          | 0.045                 | 0.585                        | 0.032                        |
|          |          | $\pm 0.084$  | $\pm 0.065$ | $\pm 0.078$ | $\pm 0.040$  | $\pm 0.141$ | $\pm 0.057$         | $\pm 0.022$         | $\pm 0.048$          | $\pm 0.029$          | $\pm 0.057$            | $\pm 0.046$            | $\pm 0.058$          | $\pm 0.064$          | $\pm 0.054$           | $\pm 0.033$           | $\pm 0.050$                  | $\pm 0.012$                  |
| Subject9 | Acc.1    | 0.540        | 0.355       | 0.495       | 0.550        | 0.255       | 0.491               | 0.244               | 0.478                | 0.044                | 0.131                  | 0.050                  | 0.237                | 0.263                | <b>0.591</b>          | 0.037                 | 0.609                        | 0.020                        |
|          |          | $\pm 0.084$  | $\pm 0.065$ | $\pm 0.078$ | $\pm 0.040$  | $\pm 0.141$ | $\pm 0.103$         | $\pm 0.059$         | $\pm 0.079$          | $\pm 0.030$          | $\pm 0.042$            | $\pm 0.050$            | $\pm 0.055$          | $\pm 0.079$          | $\pm 0.096$           | $\pm 0.024$           | $\pm 0.074$                  | $\pm 0.008$                  |

Continued on next page

| Subject  | Metric   | DeepConvnet                 | EEGNet               | Conformer                   | CTNet                       | SSVEPDNN             | BIOT (f)             | BIOT (l)             | BENDR (f)                   | BENDR (l)            | CBraMod (f)          | CBraMod (l)          | EEGPT (f)            | EEGPT (l)            | LaBraM (f)                  | LaBraM (l)           | STEEGformer-s (f)           | STEEGformer-s (l)    |
|----------|----------|-----------------------------|----------------------|-----------------------------|-----------------------------|----------------------|----------------------|----------------------|-----------------------------|----------------------|----------------------|----------------------|----------------------|----------------------|-----------------------------|----------------------|-----------------------------|----------------------|
| Subject7 | Acc.2    | <b>0.770</b><br>$\pm 0.048$ | 0.560<br>$\pm 0.042$ | 0.700<br>$\pm 0.053$        | 0.710<br>$\pm 0.074$        | 0.345<br>$\pm 0.169$ | 0.659<br>$\pm 0.087$ | 0.394<br>$\pm 0.059$ | 0.659<br>$\pm 0.086$        | 0.066<br>$\pm 0.034$ | 0.237<br>$\pm 0.070$ | 0.111<br>$\pm 0.062$ | 0.322<br>$\pm 0.049$ | 0.441<br>$\pm 0.078$ | 0.684<br>$\pm 0.138$        | 0.081<br>$\pm 0.058$ | 0.780<br>$\pm 0.053$        | 0.049<br>$\pm 0.014$ |
|          | $\kappa$ | 0.174<br>$\pm 0.146$        | 0.256<br>$\pm 0.060$ | 0.277<br>$\pm 0.093$        | 0.333<br>$\pm 0.107$        | 0.133<br>$\pm 0.061$ | 0.267<br>$\pm 0.053$ | 0.231<br>$\pm 0.126$ | 0.287<br>$\pm 0.090$        | 0.015<br>$\pm 0.029$ | 0.048<br>$\pm 0.048$ | 0.010<br>$\pm 0.014$ | 0.092<br>$\pm 0.039$ | 0.218<br>$\pm 0.058$ | <b>0.313</b><br>$\pm 0.061$ | 0.010<br>$\pm 0.029$ | 0.277<br>$\pm 0.114$        | 0.031<br>$\pm 0.021$ |
|          | AUC      | 0.799<br>$\pm 0.083$        | 0.857<br>$\pm 0.033$ | <b>0.904</b><br>$\pm 0.017$ | 0.918<br>$\pm 0.023$        | 0.804<br>$\pm 0.011$ | 0.840<br>$\pm 0.020$ | 0.847<br>$\pm 0.033$ | 0.855<br>$\pm 0.033$        | 0.529<br>$\pm 0.047$ | 0.702<br>$\pm 0.063$ | 0.610<br>$\pm 0.042$ | 0.751<br>$\pm 0.024$ | 0.840<br>$\pm 0.019$ | 0.848<br>$\pm 0.050$        | 0.559<br>$\pm 0.070$ | 0.802<br>$\pm 0.051$        | 0.636<br>$\pm 0.057$ |
|          | BAcc     | 0.195<br>$\pm 0.142$        | 0.275<br>$\pm 0.059$ | 0.295<br>$\pm 0.091$        | 0.350<br>$\pm 0.105$        | 0.155<br>$\pm 0.060$ | 0.285<br>$\pm 0.052$ | 0.250<br>$\pm 0.122$ | 0.305<br>$\pm 0.087$        | 0.040<br>$\pm 0.029$ | 0.072<br>$\pm 0.047$ | 0.035<br>$\pm 0.014$ | 0.115<br>$\pm 0.038$ | 0.238<br>$\pm 0.057$ | <b>0.330</b><br>$\pm 0.060$ | 0.035<br>$\pm 0.029$ | 0.295<br>$\pm 0.111$        | 0.055<br>$\pm 0.021$ |
|          | Acc.1    | 0.195<br>$\pm 0.142$        | 0.286<br>$\pm 0.052$ | 0.295<br>$\pm 0.091$        | <b>0.359</b><br>$\pm 0.151$ | 0.155<br>$\pm 0.060$ | 0.319<br>$\pm 0.101$ | 0.325<br>$\pm 0.132$ | 0.312<br>$\pm 0.062$        | 0.044<br>$\pm 0.040$ | 0.092<br>$\pm 0.060$ | 0.031<br>$\pm 0.019$ | 0.128<br>$\pm 0.055$ | 0.236<br>$\pm 0.068$ | 0.384<br>$\pm 0.109$        | 0.031<br>$\pm 0.025$ | 0.316<br>$\pm 0.168$        | 0.034<br>$\pm 0.013$ |
|          | Acc.2    | 0.290<br>$\pm 0.221$        | 0.352<br>$\pm 0.050$ | 0.500<br>$\pm 0.077$        | 0.566<br>$\pm 0.131$        | 0.240<br>$\pm 0.029$ | 0.478<br>$\pm 0.085$ | 0.503<br>$\pm 0.150$ | 0.478<br>$\pm 0.074$        | 0.056<br>$\pm 0.036$ | 0.189<br>$\pm 0.056$ | 0.116<br>$\pm 0.056$ | 0.222<br>$\pm 0.030$ | 0.326<br>$\pm 0.079$ | <b>0.559</b><br>$\pm 0.103$ | 0.072<br>$\pm 0.051$ | 0.450<br>$\pm 0.191$        | 0.075<br>$\pm 0.037$ |
|          | $\kappa$ | <b>0.333</b><br>$\pm 0.094$ | 0.231<br>$\pm 0.070$ | 0.267<br>$\pm 0.047$        | 0.288<br>$\pm 0.054$        | 0.144<br>$\pm 0.094$ | 0.267<br>$\pm 0.102$ | 0.185<br>$\pm 0.071$ | 0.362<br>$\pm 0.086$        | 0.019<br>$\pm 0.023$ | 0.026<br>$\pm 0.060$ | 0.016<br>$\pm 0.030$ | 0.175<br>$\pm 0.044$ | 0.205<br>$\pm 0.063$ | 0.327<br>$\pm 0.053$        | 0.010<br>$\pm 0.039$ | 0.282<br>$\pm 0.054$        | 0.021<br>$\pm 0.021$ |
|          | AUC      | 0.918<br>$\pm 0.034$        | 0.862<br>$\pm 0.042$ | 0.871<br>$\pm 0.016$        | 0.891<br>$\pm 0.020$        | 0.762<br>$\pm 0.124$ | 0.799<br>$\pm 0.060$ | 0.803<br>$\pm 0.039$ | <b>0.914</b><br>$\pm 0.029$ | 0.526<br>$\pm 0.051$ | 0.615<br>$\pm 0.048$ | 0.553<br>$\pm 0.035$ | 0.771<br>$\pm 0.023$ | 0.861<br>$\pm 0.020$ | 0.849<br>$\pm 0.031$        | 0.568<br>$\pm 0.041$ | 0.844<br>$\pm 0.051$        | 0.637<br>$\pm 0.032$ |
|          | BAcc     | <b>0.350</b><br>$\pm 0.092$ | 0.250<br>$\pm 0.068$ | 0.285<br>$\pm 0.045$        | 0.306<br>$\pm 0.053$        | 0.165<br>$\pm 0.091$ | 0.285<br>$\pm 0.099$ | 0.205<br>$\pm 0.069$ | 0.378<br>$\pm 0.084$        | 0.044<br>$\pm 0.022$ | 0.050<br>$\pm 0.058$ | 0.041<br>$\pm 0.030$ | 0.196<br>$\pm 0.043$ | 0.225<br>$\pm 0.061$ | 0.344<br>$\pm 0.051$        | 0.035<br>$\pm 0.038$ | 0.300<br>$\pm 0.053$        | 0.045<br>$\pm 0.021$ |
|          | Acc.1    | 0.350<br>$\pm 0.092$        | 0.250<br>$\pm 0.068$ | 0.285<br>$\pm 0.045$        | 0.385<br>$\pm 0.076$        | 0.165<br>$\pm 0.091$ | 0.347<br>$\pm 0.113$ | 0.231<br>$\pm 0.092$ | 0.436<br>$\pm 0.077$        | 0.051<br>$\pm 0.041$ | 0.066<br>$\pm 0.069$ | 0.049<br>$\pm 0.050$ | 0.224<br>$\pm 0.061$ | 0.281<br>$\pm 0.088$ | <b>0.408</b><br>$\pm 0.085$ | 0.050<br>$\pm 0.064$ | 0.366<br>$\pm 0.039$        | 0.028<br>$\pm 0.013$ |
|          | Acc.2    | 0.500<br>$\pm 0.094$        | 0.430<br>$\pm 0.065$ | 0.420<br>$\pm 0.037$        | 0.553<br>$\pm 0.094$        | 0.265<br>$\pm 0.129$ | 0.444<br>$\pm 0.148$ | 0.309<br>$\pm 0.089$ | 0.625<br>$\pm 0.068$        | 0.094<br>$\pm 0.072$ | 0.164<br>$\pm 0.072$ | 0.094<br>$\pm 0.062$ | 0.299<br>$\pm 0.067$ | 0.441<br>$\pm 0.051$ | 0.514<br>$\pm 0.111$        | 0.106<br>$\pm 0.079$ | <b>0.606</b><br>$\pm 0.126$ | 0.072<br>$\pm 0.028$ |
| Subject9 | $\kappa$ | <b>0.395</b><br>$\pm 0.099$ | 0.287<br>$\pm 0.088$ | 0.256<br>$\pm 0.065$        | 0.372<br>$\pm 0.102$        | 0.241<br>$\pm 0.099$ | 0.359<br>$\pm 0.083$ | 0.179<br>$\pm 0.065$ | 0.401<br>$\pm 0.083$        | 0.016<br>$\pm 0.036$ | 0.071<br>$\pm 0.033$ | 0.000<br>$\pm 0.018$ | 0.103<br>$\pm 0.051$ | 0.164<br>$\pm 0.029$ | 0.228<br>$\pm 0.016$        | 0.021<br>$\pm 0.028$ | 0.333<br>$\pm 0.068$        | 0.019<br>$\pm 0.023$ |
|          | AUC      | 0.923<br>$\pm 0.040$        | 0.867<br>$\pm 0.012$ | 0.883<br>$\pm 0.037$        | <b>0.915</b><br>$\pm 0.016$ | 0.834<br>$\pm 0.036$ | 0.844<br>$\pm 0.033$ | 0.808<br>$\pm 0.037$ | 0.911<br>$\pm 0.026$        | 0.611<br>$\pm 0.052$ | 0.687<br>$\pm 0.050$ | 0.518<br>$\pm 0.036$ | 0.715<br>$\pm 0.058$ | 0.781<br>$\pm 0.018$ | 0.830<br>$\pm 0.025$        | 0.533<br>$\pm 0.046$ | 0.825<br>$\pm 0.037$        | 0.590<br>$\pm 0.038$ |
|          | BAcc     | <b>0.410</b><br>$\pm 0.096$ | 0.305<br>$\pm 0.086$ | 0.275<br>$\pm 0.064$        | 0.388<br>$\pm 0.099$        | 0.260<br>$\pm 0.096$ | 0.375<br>$\pm 0.081$ | 0.200<br>$\pm 0.064$ | 0.416<br>$\pm 0.081$        | 0.041<br>$\pm 0.035$ | 0.094<br>$\pm 0.032$ | 0.025<br>$\pm 0.018$ | 0.125<br>$\pm 0.050$ | 0.185<br>$\pm 0.029$ | 0.247<br>$\pm 0.016$        | 0.045<br>$\pm 0.027$ | 0.350<br>$\pm 0.066$        | 0.044<br>$\pm 0.022$ |
|          | Acc.1    | <b>0.410</b><br>$\pm 0.096$ | 0.305<br>$\pm 0.086$ | 0.275<br>$\pm 0.064$        | 0.402<br>$\pm 0.116$        | 0.260<br>$\pm 0.096$ | 0.422<br>$\pm 0.074$ | 0.209<br>$\pm 0.070$ | 0.406<br>$\pm 0.096$        | 0.043<br>$\pm 0.042$ | 0.094<br>$\pm 0.047$ | 0.025<br>$\pm 0.024$ | 0.125<br>$\pm 0.059$ | 0.200<br>$\pm 0.030$ | 0.254<br>$\pm 0.054$        | 0.037<br>$\pm 0.021$ | 0.341<br>$\pm 0.062$        | 0.045<br>$\pm 0.037$ |
|          | Acc.2    | <b>0.550</b><br>$\pm 0.105$ | 0.415<br>$\pm 0.052$ | 0.430<br>$\pm 0.108$        | 0.542<br>$\pm 0.070$        | 0.375<br>$\pm 0.108$ | 0.525<br>$\pm 0.125$ | 0.309<br>$\pm 0.097$ | 0.562<br>$\pm 0.084$        | 0.061<br>$\pm 0.054$ | 0.191<br>$\pm 0.067$ | 0.053<br>$\pm 0.032$ | 0.206<br>$\pm 0.098$ | 0.253<br>$\pm 0.049$ | 0.373<br>$\pm 0.059$        | 0.062<br>$\pm 0.044$ | 0.512<br>$\pm 0.062$        | 0.098<br>$\pm 0.066$ |

## Generalization Drop After Fine-Tuning

Table 67: Average Model Performance Drop

| Model (Strategy)         | $\kappa$     | AUC          | BAcc         | Acc.1        | Acc.2        |
|--------------------------|--------------|--------------|--------------|--------------|--------------|
|                          | 0.142        | 0.137        | 0.138        | 0.138        | 0.194        |
| <b>DeepConvnet</b>       | $\pm 0.041$  | $\pm 0.038$  | $\pm 0.040$  | $\pm 0.040$  | $\pm 0.054$  |
|                          | 0.129        | 0.136        | 0.126        | 0.126        | 0.185        |
| <b>EEGNet</b>            | $\pm 0.023$  | $\pm 0.035$  | $\pm 0.023$  | $\pm 0.022$  | $\pm 0.035$  |
|                          | 0.125        | 0.154        | 0.122        | 0.122        | 0.176        |
| <b>Conformer</b>         | $\pm 0.029$  | $\pm 0.044$  | $\pm 0.028$  | $\pm 0.031$  | $\pm 0.048$  |
|                          | 0.199        | 0.160        | 0.194        | 0.195        | 0.275        |
| <b>CTNet</b>             | $\pm 0.025$  | $\pm 0.036$  | $\pm 0.024$  | $\pm 0.028$  | $\pm 0.044$  |
|                          | 0.110        | 0.148        | 0.107        | 0.107        | 0.158        |
| <b>SSVEPDNN</b>          | $\pm 0.019$  | $\pm 0.033$  | $\pm 0.019$  | $\pm 0.019$  | $\pm 0.029$  |
|                          | 0.098        | 0.060        | 0.096        | 0.097        | 0.127        |
| <b>BIOT (f)</b>          | $\pm 0.033$  | $\pm 0.028$  | $\pm 0.032$  | $\pm 0.035$  | $\pm 0.050$  |
|                          | 0.113        | 0.129        | 0.110        | 0.112        | 0.183        |
| <b>BIOT (l)</b>          | $\pm 0.020$  | $\pm 0.031$  | $\pm 0.019$  | $\pm 0.021$  | $\pm 0.032$  |
|                          | 0.070        | 0.051        | 0.068        | 0.066        | 0.086        |
| <b>BENDR (f)</b>         | $\pm 0.036$  | $\pm 0.027$  | $\pm 0.035$  | $\pm 0.034$  | $\pm 0.043$  |
|                          | <b>0.008</b> | 0.044        | <b>0.008</b> | 0.008        | 0.014        |
| <b>BENDR (l)</b>         | $\pm 0.002$  | $\pm 0.007$  | $\pm 0.002$  | $\pm 0.003$  | $\pm 0.006$  |
|                          | 0.011        | 0.018        | 0.010        | 0.010        | 0.019        |
| <b>CBraMod (f)</b>       | $\pm 0.007$  | $\pm 0.010$  | $\pm 0.007$  | $\pm 0.012$  | $\pm 0.019$  |
|                          | 0.021        | 0.099        | 0.020        | 0.028        | 0.047        |
| <b>CBraMod (l)</b>       | $\pm 0.007$  | $\pm 0.026$  | $\pm 0.007$  | $\pm 0.014$  | $\pm 0.020$  |
|                          | 0.030        | 0.029        | 0.029        | 0.032        | 0.040        |
| <b>EEGPT (f)</b>         | $\pm 0.014$  | $\pm 0.017$  | $\pm 0.013$  | $\pm 0.018$  | $\pm 0.022$  |
|                          | 0.124        | 0.142        | 0.121        | 0.131        | 0.184        |
| <b>EEGPT (l)</b>         | $\pm 0.015$  | $\pm 0.039$  | $\pm 0.015$  | $\pm 0.019$  | $\pm 0.031$  |
|                          | 0.094        | 0.044        | 0.092        | 0.093        | 0.108        |
| <b>LaBraM (f)</b>        | $\pm 0.030$  | $\pm 0.019$  | $\pm 0.029$  | $\pm 0.034$  | $\pm 0.040$  |
|                          | 0.006        | <b>0.024</b> | 0.006        | 0.003        | 0.006        |
| <b>LaBraM (l)</b>        | $\pm 0.003$  | $\pm 0.006$  | $\pm 0.003$  | $\pm 0.008$  | $\pm 0.013$  |
|                          | 0.110        | 0.062        | 0.107        | 0.109        | 0.134        |
| <b>STEEGformer-s (f)</b> | $\pm 0.033$  | $\pm 0.027$  | $\pm 0.032$  | $\pm 0.039$  | $\pm 0.051$  |
|                          | 0.011        | 0.056        | 0.010        | <b>0.003</b> | <b>0.008</b> |
| <b>STEEGformer-s (l)</b> | $\pm 0.002$  | $\pm 0.012$  | $\pm 0.002$  | $\pm 0.010$  | $\pm 0.016$  |

8622  
8623  
8624  
8625  
8626  
8627  
8628  
8629  
8630  
8631  
8632  
8633  
8634  
8635  
8636  
8637  
8638  
8639  
8640  
8641  
8642  
8643  
8644  
8645  
8646  
8647  
8648  
8649  
8650  
8651  
8652  
8653  
8654

Table 68: Per-Subject Average Drop on Seen Subjects (Post-Fine-Tuning).

| Subject   | Metric   | DeepConvnet | EEGNet      | Conformer   | CTNet       | SSVEPDNN    | BIOT (f)    | BIOT (l)    | BENDR (f)   | BENDR (l)    | CBraMod (f)  | CBraMod (l) | EEGPT (f)    | EEGPT (l)   | LaBraM (f)  | LaBraM (l)   | STEEGformers (f) | STEEGformers (l) |
|-----------|----------|-------------|-------------|-------------|-------------|-------------|-------------|-------------|-------------|--------------|--------------|-------------|--------------|-------------|-------------|--------------|------------------|------------------|
| Subject1  | $\kappa$ | 0.166       | 0.135       | 0.138       | 0.212       | 0.124       | 0.079       | 0.097       | 0.098       | 0.006        | 0.014        | 0.028       | 0.053        | 0.128       | 0.105       | <b>0.010</b> | 0.123            | 0.010            |
|           |          | $\pm 0.121$ | $\pm 0.112$ | $\pm 0.096$ | $\pm 0.137$ | $\pm 0.101$ | $\pm 0.058$ | $\pm 0.078$ | $\pm 0.079$ | $\pm 0.016$  | $\pm 0.024$  | $\pm 0.022$ | $\pm 0.051$  | $\pm 0.097$ | $\pm 0.070$ | $\pm 0.022$  | $\pm 0.077$      | $\pm 0.020$      |
|           | AUC      | 0.151       | 0.154       | 0.164       | 0.158       | 0.173       | 0.041       | 0.107       | 0.071       | 0.053        | 0.011        | 0.104       | 0.161        | 0.036       | 0.036       | <b>0.024</b> | 0.076            | 0.056            |
|           |          | $\pm 0.071$ | $\pm 0.071$ | $\pm 0.072$ | $\pm 0.075$ | $\pm 0.091$ | $\pm 0.031$ | $\pm 0.048$ | $\pm 0.046$ | $\pm 0.052$  | $\pm 0.025$  | $\pm 0.044$ | $\pm 0.028$  | $\pm 0.065$ | $\pm 0.025$ | $\pm 0.037$  | $\pm 0.031$      | $\pm 0.034$      |
|           | BAcc     | 0.162       | 0.131       | 0.135       | 0.207       | 0.121       | 0.077       | 0.095       | 0.095       | 0.006        | 0.014        | 0.027       | 0.052        | 0.125       | 0.103       | <b>0.009</b> | 0.120            | 0.010            |
|           |          | $\pm 0.118$ | $\pm 0.109$ | $\pm 0.093$ | $\pm 0.134$ | $\pm 0.099$ | $\pm 0.057$ | $\pm 0.076$ | $\pm 0.077$ | $\pm 0.015$  | $\pm 0.023$  | $\pm 0.022$ | $\pm 0.050$  | $\pm 0.094$ | $\pm 0.069$ | $\pm 0.022$  | $\pm 0.075$      | $\pm 0.019$      |
| Subject10 | Acc.1    | 0.162       | 0.131       | 0.135       | 0.207       | 0.121       | 0.099       | 0.096       | 0.100       | 0.006        | 0.024        | 0.043       | 0.075        | 0.158       | 0.133       | 0.011        | 0.146            | <b>0.010</b>     |
|           |          | $\pm 0.118$ | $\pm 0.109$ | $\pm 0.093$ | $\pm 0.134$ | $\pm 0.099$ | $\pm 0.068$ | $\pm 0.079$ | $\pm 0.080$ | $\pm 0.021$  | $\pm 0.032$  | $\pm 0.028$ | $\pm 0.068$  | $\pm 0.115$ | $\pm 0.082$ | $\pm 0.022$  | $\pm 0.102$      | $\pm 0.027$      |
|           | Acc.2    | 0.226       | 0.194       | 0.191       | 0.291       | 0.172       | 0.126       | 0.152       | 0.126       | 0.011        | 0.033        | 0.068       | 0.085        | 0.230       | 0.148       | <b>0.016</b> | 0.168            | 0.020            |
|           |          | $\pm 0.142$ | $\pm 0.145$ | $\pm 0.119$ | $\pm 0.173$ | $\pm 0.136$ | $\pm 0.063$ | $\pm 0.112$ | $\pm 0.092$ | $\pm 0.033$  | $\pm 0.040$  | $\pm 0.048$ | $\pm 0.069$  | $\pm 0.145$ | $\pm 0.085$ | $\pm 0.025$  | $\pm 0.111$      | $\pm 0.036$      |
| Subject11 | $\kappa$ | 0.185       | 0.167       | 0.161       | 0.234       | 0.135       | 0.109       | 0.125       | 0.130       | 0.012        | -0.000       | 0.016       | 0.052        | 0.132       | 0.123       | <b>0.005</b> | 0.138            | 0.009            |
|           |          | $\pm 0.125$ | $\pm 0.117$ | $\pm 0.114$ | $\pm 0.148$ | $\pm 0.105$ | $\pm 0.075$ | $\pm 0.085$ | $\pm 0.077$ | $\pm 0.018$  | $\pm 0.020$  | $\pm 0.018$ | $\pm 0.049$  | $\pm 0.092$ | $\pm 0.074$ | $\pm 0.023$  | $\pm 0.082$      | $\pm 0.018$      |
|           | AUC      | 0.191       | 0.187       | 0.209       | 0.206       | 0.192       | 0.058       | 0.139       | 0.097       | 0.049        | 0.016        | 0.095       | 0.055        | 0.167       | 0.065       | <b>0.024</b> | 0.083            | 0.047            |
|           |          | $\pm 0.070$ | $\pm 0.072$ | $\pm 0.069$ | $\pm 0.076$ | $\pm 0.085$ | $\pm 0.030$ | $\pm 0.053$ | $\pm 0.040$ | $\pm 0.043$  | $\pm 0.018$  | $\pm 0.034$ | $\pm 0.032$  | $\pm 0.059$ | $\pm 0.027$ | $\pm 0.028$  | $\pm 0.035$      | $\pm 0.028$      |
|           | BAcc     | 0.180       | 0.162       | 0.157       | 0.229       | 0.132       | 0.106       | 0.122       | 0.127       | 0.011        | -0.000       | 0.016       | 0.050        | 0.129       | 0.120       | <b>0.004</b> | 0.134            | 0.009            |
|           |          | $\pm 0.121$ | $\pm 0.114$ | $\pm 0.112$ | $\pm 0.145$ | $\pm 0.103$ | $\pm 0.073$ | $\pm 0.083$ | $\pm 0.075$ | $\pm 0.018$  | $\pm 0.019$  | $\pm 0.018$ | $\pm 0.048$  | $\pm 0.090$ | $\pm 0.073$ | $\pm 0.022$  | $\pm 0.080$      | $\pm 0.018$      |
| Subject1  | Acc.1    | 0.180       | 0.162       | 0.157       | 0.229       | 0.132       | 0.111       | 0.130       | 0.127       | 0.014        | <b>0.001</b> | 0.002       | 0.064        | 0.150       | 0.142       | -0.004       | 0.149            | 0.005            |
|           |          | $\pm 0.121$ | $\pm 0.114$ | $\pm 0.112$ | $\pm 0.145$ | $\pm 0.103$ | $\pm 0.071$ | $\pm 0.096$ | $\pm 0.077$ | $\pm 0.023$  | $\pm 0.028$  | $\pm 0.029$ | $\pm 0.055$  | $\pm 0.104$ | $\pm 0.078$ | $\pm 0.025$  | $\pm 0.092$      | $\pm 0.022$      |
|           | Acc.2    | 0.251       | 0.239       | 0.230       | 0.329       | 0.205       | 0.141       | 0.204       | 0.163       | 0.017        | 0.011        | 0.024       | 0.076        | 0.214       | 0.169       | -0.007       | 0.181            | <b>0.008</b>     |
|           |          | $\pm 0.147$ | $\pm 0.152$ | $\pm 0.145$ | $\pm 0.186$ | $\pm 0.140$ | $\pm 0.072$ | $\pm 0.135$ | $\pm 0.088$ | $\pm 0.030$  | $\pm 0.043$  | $\pm 0.037$ | $\pm 0.053$  | $\pm 0.136$ | $\pm 0.081$ | $\pm 0.031$  | $\pm 0.096$      | $\pm 0.032$      |
|           | $\kappa$ | 0.166       | 0.144       | 0.146       | 0.199       | 0.116       | 0.094       | 0.113       | 0.063       | <b>0.008</b> | 0.002        | 0.023       | 0.026        | 0.117       | 0.089       | 0.009        | 0.113            | 0.009            |
|           |          | $\pm 0.110$ | $\pm 0.097$ | $\pm 0.111$ | $\pm 0.130$ | $\pm 0.092$ | $\pm 0.069$ | $\pm 0.089$ | $\pm 0.047$ | $\pm 0.020$  | $\pm 0.022$  | $\pm 0.027$ | $\pm 0.040$  | $\pm 0.092$ | $\pm 0.057$ | $\pm 0.020$  | $\pm 0.068$      | $\pm 0.018$      |
| Subject11 | AUC      | 0.140       | 0.139       | 0.188       | 0.167       | 0.154       | 0.055       | 0.123       | 0.045       | 0.051        | 0.011        | 0.110       | <b>0.027</b> | 0.143       | 0.046       | 0.027        | 0.059            | 0.069            |
|           |          | $\pm 0.061$ | $\pm 0.062$ | $\pm 0.062$ | $\pm 0.064$ | $\pm 0.079$ | $\pm 0.028$ | $\pm 0.046$ | $\pm 0.032$ | $\pm 0.045$  | $\pm 0.014$  | $\pm 0.046$ | $\pm 0.025$  | $\pm 0.056$ | $\pm 0.016$ | $\pm 0.030$  | $\pm 0.033$      | $\pm 0.036$      |
|           | BAcc     | 0.162       | 0.141       | 0.142       | 0.194       | 0.113       | 0.092       | 0.110       | 0.061       | <b>0.008</b> | 0.002        | 0.026       | 0.115        | 0.086       | 0.009       | 0.110        | 0.009            |                  |
|           |          | $\pm 0.108$ | $\pm 0.095$ | $\pm 0.109$ | $\pm 0.126$ | $\pm 0.090$ | $\pm 0.067$ | $\pm 0.087$ | $\pm 0.046$ | $\pm 0.020$  | $\pm 0.021$  | $\pm 0.026$ | $\pm 0.039$  | $\pm 0.090$ | $\pm 0.055$ | $\pm 0.019$  | $\pm 0.066$      | $\pm 0.018$      |
|           | Acc.1    | 0.162       | 0.141       | 0.141       | 0.199       | 0.113       | 0.081       | 0.094       | 0.059       | 0.008        | -0.001       | 0.034       | 0.032        | 0.138       | 0.090       | 0.005        | 0.124            | <b>0.005</b>     |
|           |          | $\pm 0.108$ | $\pm 0.095$ | $\pm 0.110$ | $\pm 0.126$ | $\pm 0.090$ | $\pm 0.068$ | $\pm 0.083$ | $\pm 0.047$ | $\pm 0.022$  | $\pm 0.027$  | $\pm 0.038$ | $\pm 0.043$  | $\pm 0.108$ | $\pm 0.057$ | $\pm 0.019$  | $\pm 0.073$      | $\pm 0.022$      |
| Subject11 | Acc.2    | 0.219       | 0.194       | 0.206       | 0.285       | 0.176       | 0.110       | 0.171       | 0.074       | 0.015        | 0.010        | 0.056       | 0.042        | 0.199       | 0.099       | <b>0.008</b> | 0.149            | 0.005            |
|           |          | $\pm 0.130$ | $\pm 0.130$ | $\pm 0.120$ | $\pm 0.173$ | $\pm 0.122$ | $\pm 0.064$ | $\pm 0.133$ | $\pm 0.052$ | $\pm 0.027$  | $\pm 0.034$  | $\pm 0.047$ | $\pm 0.047$  | $\pm 0.126$ | $\pm 0.057$ | $\pm 0.027$  | $\pm 0.088$      | $\pm 0.026$      |

Continued on next page

| Subject   | Metric   | DeepConvnet            | EEGNet               | Conformer            | CTNet                | SSVEPDNN             | BIOT (f)             | BIOT (l)             | BENDR (f)            | BENDR (l)                   | CBraMod (f)                 | CBraMod (l)          | EEGPT (f)                   | EEGPT (l)            | LaBraM (f)           | LaBraM (l)                    | STEEGformer-s (f)    | STEEGformer-s (l)     |
|-----------|----------|------------------------|----------------------|----------------------|----------------------|----------------------|----------------------|----------------------|----------------------|-----------------------------|-----------------------------|----------------------|-----------------------------|----------------------|----------------------|-------------------------------|----------------------|-----------------------|
| Subject12 | $\kappa$ | 0.205<br>$\pm 0.137$   | 0.177<br>$\pm 0.129$ | 0.167<br>$\pm 0.114$ | 0.252<br>$\pm 0.164$ | 0.137<br>$\pm 0.103$ | 0.191<br>$\pm 0.123$ | 0.165<br>$\pm 0.128$ | 0.148<br>$\pm 0.095$ | 0.006<br>$\pm 0.018$        | 0.011<br>$\pm 0.024$        | 0.016<br>$\pm 0.021$ | 0.048<br>$\pm 0.050$        | 0.143<br>$\pm 0.108$ | 0.180<br>$\pm 0.108$ | <b>0.008</b><br>$\pm 0.017$   | 0.210<br>$\pm 0.128$ | 0.013<br>$\pm 0.017$  |
|           | AUC      | 0.216<br>$\pm 0.074$   | 0.216<br>$\pm 0.083$ | 0.226<br>$\pm 0.077$ | 0.245<br>$\pm 0.077$ | 0.203<br>$\pm 0.092$ | 0.148<br>$\pm 0.061$ | 0.210<br>$\pm 0.083$ | 0.114<br>$\pm 0.036$ | 0.045<br>$\pm 0.038$        | 0.010<br>$\pm 0.017$        | 0.100<br>$\pm 0.037$ | 0.047<br>$\pm 0.032$        | 0.190<br>$\pm 0.078$ | 0.104<br>$\pm 0.029$ | <b>0.032</b><br>$\pm 0.027$   | 0.165<br>$\pm 0.064$ | 0.073<br>$\pm 0.033$  |
|           | BAcc     | 0.200<br>$\pm 0.133$   | 0.173<br>$\pm 0.126$ | 0.163<br>$\pm 0.111$ | 0.245<br>$\pm 0.160$ | 0.134<br>$\pm 0.101$ | 0.186<br>$\pm 0.120$ | 0.161<br>$\pm 0.125$ | 0.144<br>$\pm 0.092$ | 0.006<br>$\pm 0.018$        | 0.011<br>$\pm 0.024$        | 0.016<br>$\pm 0.020$ | 0.047<br>$\pm 0.048$        | 0.139<br>$\pm 0.106$ | 0.176<br>$\pm 0.105$ | <b>0.007</b><br>$\pm 0.017$   | 0.204<br>$\pm 0.125$ | 0.013<br>$\pm 0.016$  |
|           | Acc.1    | 0.198<br>$\pm 0.133$   | 0.163<br>$\pm 0.119$ | 0.177<br>$\pm 0.115$ | 0.245<br>$\pm 0.160$ | 0.134<br>$\pm 0.101$ | 0.180<br>$\pm 0.113$ | 0.169<br>$\pm 0.130$ | 0.127<br>$\pm 0.084$ | <b>0.005</b><br>$\pm 0.023$ | 0.005<br>$\pm 0.029$        | 0.023<br>$\pm 0.030$ | 0.052<br>$\pm 0.059$        | 0.154<br>$\pm 0.118$ | 0.166<br>$\pm 0.103$ | 0.004<br>$\pm 0.021$          | 0.203<br>$\pm 0.132$ | 0.009<br>$\pm 0.023$  |
|           | Acc.2    | 0.273<br>$\pm 0.154$   | 0.241<br>$\pm 0.158$ | 0.255<br>$\pm 0.154$ | 0.351<br>$\pm 0.201$ | 0.201<br>$\pm 0.145$ | 0.246<br>$\pm 0.145$ | 0.274<br>$\pm 0.190$ | 0.169<br>$\pm 0.098$ | 0.010<br>$\pm 0.032$        | 0.021<br>$\pm 0.034$        | 0.044<br>$\pm 0.038$ | 0.058<br>$\pm 0.069$        | 0.225<br>$\pm 0.150$ | 0.195<br>$\pm 0.095$ | <b>0.013</b><br>$\pm 0.033$   | 0.262<br>$\pm 0.143$ | 0.013<br>$\pm 0.031$  |
| Subject13 | $\kappa$ | 0.148<br>$\pm 0.099$   | 0.125<br>$\pm 0.095$ | 0.096<br>$\pm 0.075$ | 0.193<br>$\pm 0.124$ | 0.118<br>$\pm 0.087$ | 0.085<br>$\pm 0.053$ | 0.100<br>$\pm 0.063$ | 0.057<br>$\pm 0.058$ | 0.002<br>$\pm 0.017$        | 0.011<br>$\pm 0.023$        | 0.018<br>$\pm 0.019$ | 0.010<br>$\pm 0.023$        | 0.097<br>$\pm 0.066$ | 0.060<br>$\pm 0.050$ | <b>0.006</b><br>$\pm 0.015$   | 0.093<br>$\pm 0.066$ | 0.007<br>$\pm 0.015$  |
|           | AUC      | 0.120<br>$\pm 0.076$   | 0.130<br>$\pm 0.063$ | 0.123<br>$\pm 0.072$ | 0.152<br>$\pm 0.056$ | 0.150<br>$\pm 0.076$ | 0.047<br>$\pm 0.027$ | 0.103<br>$\pm 0.039$ | 0.039<br>$\pm 0.039$ | 0.037<br>$\pm 0.040$        | <b>0.008</b><br>$\pm 0.019$ | 0.067<br>$\pm 0.032$ | 0.007<br>$\pm 0.018$        | 0.085<br>$\pm 0.041$ | 0.031<br>$\pm 0.018$ | 0.023<br>$\pm 0.031$          | 0.045<br>$\pm 0.036$ | 0.043<br>$\pm 0.031$  |
|           | BAcc     | 0.144<br>$\pm 0.096$   | 0.122<br>$\pm 0.093$ | 0.094<br>$\pm 0.073$ | 0.189<br>$\pm 0.121$ | 0.115<br>$\pm 0.084$ | 0.083<br>$\pm 0.052$ | 0.098<br>$\pm 0.061$ | 0.056<br>$\pm 0.057$ | 0.002<br>$\pm 0.017$        | 0.011<br>$\pm 0.022$        | 0.018<br>$\pm 0.018$ | 0.010<br>$\pm 0.022$        | 0.095<br>$\pm 0.065$ | 0.059<br>$\pm 0.049$ | <b>0.006</b><br>$\pm 0.014$   | 0.091<br>$\pm 0.064$ | 0.007<br>$\pm 0.015$  |
|           | Acc.1    | 0.144<br>$\pm 0.096$   | 0.122<br>$\pm 0.093$ | 0.094<br>$\pm 0.073$ | 0.189<br>$\pm 0.121$ | 0.115<br>$\pm 0.084$ | 0.105<br>$\pm 0.068$ | 0.105<br>$\pm 0.066$ | 0.057<br>$\pm 0.060$ | 0.002<br>$\pm 0.020$        | 0.012<br>$\pm 0.028$        | 0.025<br>$\pm 0.021$ | <b>0.008</b><br>$\pm 0.031$ | 0.107<br>$\pm 0.065$ | 0.060<br>$\pm 0.054$ | 0.012<br>$\pm 0.016$          | 0.086<br>$\pm 0.070$ | 0.010<br>$\pm 0.020$  |
|           | Acc.2    | 0.209<br>$\pm 0.125$   | 0.179<br>$\pm 0.113$ | 0.147<br>$\pm 0.097$ | 0.272<br>$\pm 0.157$ | 0.164<br>$\pm 0.113$ | 0.130<br>$\pm 0.068$ | 0.170<br>$\pm 0.102$ | 0.075<br>$\pm 0.080$ | 0.009<br>$\pm 0.027$        | 0.024<br>$\pm 0.038$        | 0.044<br>$\pm 0.042$ | <b>0.011</b><br>$\pm 0.034$ | 0.142<br>$\pm 0.079$ | 0.079<br>$\pm 0.050$ | 0.026<br>$\pm 0.027$          | 0.103<br>$\pm 0.085$ | 0.017<br>$\pm 0.027$  |
| Subject14 | $\kappa$ | 0.122<br>$\pm 0.110$   | 0.097<br>$\pm 0.076$ | 0.094<br>$\pm 0.077$ | 0.162<br>$\pm 0.115$ | 0.092<br>$\pm 0.079$ | 0.071<br>$\pm 0.063$ | 0.097<br>$\pm 0.075$ | 0.062<br>$\pm 0.067$ | 0.011<br>$\pm 0.018$        | -0.008<br>$\pm 0.018$       | 0.014<br>$\pm 0.023$ | 0.029<br>$\pm 0.037$        | 0.101<br>$\pm 0.076$ | 0.070<br>$\pm 0.054$ | <b>0.004</b><br>$\pm 0.017$   | 0.086<br>$\pm 0.076$ | 0.011<br>$\pm 0.020$  |
|           | AUC      | 0.100<br>$\pm 0.078$   | 0.088<br>$\pm 0.058$ | 0.096<br>$\pm 0.072$ | 0.117<br>$\pm 0.060$ | 0.111<br>$\pm 0.071$ | 0.029<br>$\pm 0.029$ | 0.111<br>$\pm 0.044$ | 0.044<br>$\pm 0.055$ | 0.041<br>$\pm 0.050$        | -0.000<br>$\pm 0.016$       | 0.089<br>$\pm 0.047$ | 0.021<br>$\pm 0.022$        | 0.089<br>$\pm 0.043$ | 0.038<br>$\pm 0.021$ | <b>0.016</b><br>$\pm 0.024$   | 0.039<br>$\pm 0.035$ | 0.049<br>$\pm 0.026$  |
|           | BAcc     | 0.119<br>$\pm 0.108$   | 0.095<br>$\pm 0.074$ | 0.092<br>$\pm 0.076$ | 0.158<br>$\pm 0.112$ | 0.089<br>$\pm 0.077$ | 0.069<br>$\pm 0.062$ | 0.095<br>$\pm 0.073$ | 0.060<br>$\pm 0.065$ | 0.010<br>$\pm 0.017$        | -0.007<br>$\pm 0.018$       | 0.014<br>$\pm 0.023$ | 0.028<br>$\pm 0.036$        | 0.099<br>$\pm 0.075$ | 0.068<br>$\pm 0.053$ | <b>0.004</b><br>$\pm 0.016$   | 0.084<br>$\pm 0.074$ | 0.011<br>$\pm 0.020$  |
|           | Acc.1    | 0.119<br>$\pm 0.108$   | 0.095<br>$\pm 0.074$ | 0.092<br>$\pm 0.076$ | 0.149<br>$\pm 0.111$ | 0.094<br>$\pm 0.078$ | 0.053<br>$\pm 0.064$ | 0.094<br>$\pm 0.079$ | 0.055<br>$\pm 0.068$ | 0.015<br>$\pm 0.023$        | -0.014<br>$\pm 0.027$       | 0.016<br>$\pm 0.036$ | 0.029<br>$\pm 0.039$        | 0.113<br>$\pm 0.079$ | 0.063<br>$\pm 0.060$ | - <b>0.008</b><br>$\pm 0.023$ | 0.073<br>$\pm 0.074$ | -0.005<br>$\pm 0.023$ |
|           | Acc.2    | 0.168<br>$\pm 0.128$   | 0.136<br>$\pm 0.097$ | 0.120<br>$\pm 0.093$ | 0.209<br>$\pm 0.145$ | 0.132<br>$\pm 0.095$ | 0.069<br>$\pm 0.059$ | 0.151<br>$\pm 0.114$ | 0.076<br>$\pm 0.084$ | 0.021<br>$\pm 0.031$        | -0.005<br>$\pm 0.045$       | 0.027<br>$\pm 0.039$ | 0.042<br>$\pm 0.045$        | 0.152<br>$\pm 0.110$ | 0.083<br>$\pm 0.056$ | - <b>0.010</b><br>$\pm 0.028$ | 0.080<br>$\pm 0.088$ | -0.011<br>$\pm 0.033$ |
| Subject15 | $\kappa$ | 0.112<br>$\pm 0.089$   | 0.105<br>$\pm 0.088$ | 0.118<br>$\pm 0.091$ | 0.180<br>$\pm 0.118$ | 0.103<br>$\pm 0.091$ | 0.087<br>$\pm 0.064$ | 0.103<br>$\pm 0.084$ | 0.053<br>$\pm 0.062$ | <b>0.005</b><br>$\pm 0.013$ | 0.010<br>$\pm 0.018$        | 0.028<br>$\pm 0.025$ | 0.022<br>$\pm 0.027$        | 0.112<br>$\pm 0.094$ | 0.086<br>$\pm 0.067$ | 0.004<br>$\pm 0.018$          | 0.096<br>$\pm 0.067$ | 0.012<br>$\pm 0.018$  |
|           |          | Continued on next page |                      |                      |                      |                      |                      |                      |                      |                             |                             |                      |                             |                      |                      |                               |                      |                       |



|           |          |             |        |           |        |          |                     |                     |                      |                      |                        |                        |                      |                      |                       |                       |                              |                              | 8688 |
|-----------|----------|-------------|--------|-----------|--------|----------|---------------------|---------------------|----------------------|----------------------|------------------------|------------------------|----------------------|----------------------|-----------------------|-----------------------|------------------------------|------------------------------|------|
|           |          |             |        |           |        |          |                     |                     |                      |                      |                        |                        |                      |                      |                       |                       |                              |                              | 8689 |
|           |          |             |        |           |        |          |                     |                     |                      |                      |                        |                        |                      |                      |                       |                       |                              |                              | 8690 |
|           |          |             |        |           |        |          |                     |                     |                      |                      |                        |                        |                      |                      |                       |                       |                              |                              | 8691 |
|           |          |             |        |           |        |          |                     |                     |                      |                      |                        |                        |                      |                      |                       |                       |                              |                              | 8692 |
|           |          |             |        |           |        |          |                     |                     |                      |                      |                        |                        |                      |                      |                       |                       |                              |                              | 8693 |
|           |          |             |        |           |        |          |                     |                     |                      |                      |                        |                        |                      |                      |                       |                       |                              |                              | 8694 |
|           |          |             |        |           |        |          |                     |                     |                      |                      |                        |                        |                      |                      |                       |                       |                              |                              | 8695 |
|           |          |             |        |           |        |          |                     |                     |                      |                      |                        |                        |                      |                      |                       |                       |                              |                              | 8696 |
|           |          |             |        |           |        |          |                     |                     |                      |                      |                        |                        |                      |                      |                       |                       |                              |                              | 8697 |
|           |          |             |        |           |        |          |                     |                     |                      |                      |                        |                        |                      |                      |                       |                       |                              |                              | 8698 |
|           |          |             |        |           |        |          |                     |                     |                      |                      |                        |                        |                      |                      |                       |                       |                              |                              | 8699 |
|           |          |             |        |           |        |          |                     |                     |                      |                      |                        |                        |                      |                      |                       |                       |                              |                              | 8700 |
|           |          |             |        |           |        |          |                     |                     |                      |                      |                        |                        |                      |                      |                       |                       |                              |                              | 8701 |
|           |          |             |        |           |        |          |                     |                     |                      |                      |                        |                        |                      |                      |                       |                       |                              |                              | 8702 |
|           |          |             |        |           |        |          |                     |                     |                      |                      |                        |                        |                      |                      |                       |                       |                              |                              | 8703 |
|           |          |             |        |           |        |          |                     |                     |                      |                      |                        |                        |                      |                      |                       |                       |                              |                              | 8704 |
|           |          |             |        |           |        |          |                     |                     |                      |                      |                        |                        |                      |                      |                       |                       |                              |                              | 8705 |
|           |          |             |        |           |        |          |                     |                     |                      |                      |                        |                        |                      |                      |                       |                       |                              |                              | 8706 |
|           |          |             |        |           |        |          |                     |                     |                      |                      |                        |                        |                      |                      |                       |                       |                              |                              | 8707 |
|           |          |             |        |           |        |          |                     |                     |                      |                      |                        |                        |                      |                      |                       |                       |                              |                              | 8708 |
|           |          |             |        |           |        |          |                     |                     |                      |                      |                        |                        |                      |                      |                       |                       |                              |                              | 8709 |
|           |          |             |        |           |        |          |                     |                     |                      |                      |                        |                        |                      |                      |                       |                       |                              |                              | 8710 |
|           |          |             |        |           |        |          |                     |                     |                      |                      |                        |                        |                      |                      |                       |                       |                              |                              | 8711 |
|           |          |             |        |           |        |          |                     |                     |                      |                      |                        |                        |                      |                      |                       |                       |                              |                              | 8712 |
|           |          |             |        |           |        |          |                     |                     |                      |                      |                        |                        |                      |                      |                       |                       |                              |                              | 8713 |
|           |          |             |        |           |        |          |                     |                     |                      |                      |                        |                        |                      |                      |                       |                       |                              |                              | 8714 |
|           |          |             |        |           |        |          |                     |                     |                      |                      |                        |                        |                      |                      |                       |                       |                              |                              | 8715 |
|           |          |             |        |           |        |          |                     |                     |                      |                      |                        |                        |                      |                      |                       |                       |                              |                              | 8716 |
|           |          |             |        |           |        |          |                     |                     |                      |                      |                        |                        |                      |                      |                       |                       |                              |                              | 8717 |
|           |          |             |        |           |        |          |                     |                     |                      |                      |                        |                        |                      |                      |                       |                       |                              |                              | 8718 |
|           |          |             |        |           |        |          |                     |                     |                      |                      |                        |                        |                      |                      |                       |                       |                              |                              | 8719 |
|           |          |             |        |           |        |          |                     |                     |                      |                      |                        |                        |                      |                      |                       |                       |                              |                              | 8720 |
| Subject   | Metric   | DeepConvnet | EEGNet | Conformer | CTNet  | SSVEPDNN | BIOT <sup>(i)</sup> | BIOT <sup>(i)</sup> | BENDR <sup>(i)</sup> | BENDR <sup>(i)</sup> | CBraMod <sup>(i)</sup> | CBraMod <sup>(i)</sup> | EEGPT <sup>(i)</sup> | EEGPT <sup>(i)</sup> | LaBraM <sup>(i)</sup> | LaBraM <sup>(i)</sup> | STEEGformer-s <sup>(i)</sup> | STEEGformer-s <sup>(i)</sup> |      |
| Subject16 | AUC      | 0.109       | 0.104  | 0.138     | 0.140  | 0.134    | 0.049               | 0.124               | 0.038                | 0.043                | 0.015                  | 0.116                  | <b>0.019</b>         | 0.122                | 0.040                 | 0.028                 | 0.053                        | 0.060                        |      |
|           |          | ±0.067      | ±0.044 | ±0.063    | ±0.055 | ±0.073   | ±0.025              | ±0.043              | ±0.043               | ±0.044               | ±0.014                 | ±0.046                 | ± <b>0.019</b>       | ±0.048               | ±0.017                | ±0.032                | ±0.028                       | ±0.033                       |      |
|           | BAcc     | 0.109       | 0.102  | 0.115     | 0.176  | 0.101    | 0.084               | 0.101               | 0.052                | <b>0.005</b>         | 0.010                  | 0.027                  | 0.021                | 0.109                | 0.084                 | 0.004                 | 0.093                        | 0.011                        |      |
|           |          | ±0.087      | ±0.086 | ±0.088    | ±0.115 | ±0.089   | ±0.063              | ±0.081              | ±0.061               | ± <b>0.013</b>       | ±0.017                 | ±0.024                 | ±0.026               | ±0.092               | ±0.066                | ±0.018                | ±0.066                       | ±0.017                       |      |
|           | Acc.1    | 0.109       | 0.102  | 0.124     | 0.176  | 0.101    | 0.087               | 0.097               | 0.063                | 0.007                | <b>0.007</b>           | 0.039                  | 0.023                | 0.115                | 0.077                 | 0.002                 | 0.115                        | 0.010                        |      |
|           |          | ±0.087      | ±0.086 | ±0.090    | ±0.110 | ±0.089   | ±0.063              | ±0.084              | ±0.073               | ±0.016               | ± <b>0.026</b>         | ±0.030                 | ±0.025               | ±0.108               | ±0.056                | ±0.022                | ±0.073                       | ±0.023                       |      |
|           | Acc.2    | 0.151       | 0.150  | 0.179     | 0.252  | 0.146    | 0.116               | 0.167               | 0.082                | <b>0.013</b>         | 0.018                  | 0.059                  | 0.027                | 0.165                | 0.082                 | 0.008                 | 0.144                        | 0.018                        |      |
|           |          | ±0.097      | ±0.098 | ±0.110    | ±0.142 | ±0.119   | ±0.071              | ±0.124              | ±0.074               | ± <b>0.030</b>       | ±0.024                 | ±0.038                 | ±0.028               | ±0.131               | ±0.053                | ±0.028                | ±0.069                       | ±0.035                       |      |
|           | $\kappa$ | 0.105       | 0.133  | 0.107     | 0.194  | 0.092    | 0.096               | 0.120               | 0.056                | 0.005                | 0.009                  | 0.016                  | 0.016                | 0.116                | 0.073                 | <b>0.008</b>          | 0.094                        | 0.012                        |      |
|           |          | ±0.082      | ±0.093 | ±0.079    | ±0.127 | ±0.085   | ±0.066              | ±0.087              | ±0.050               | ±0.019               | ±0.021                 | ±0.020                 | ±0.030               | ±0.091               | ±0.059                | ± <b>0.020</b>        | ±0.060                       | ±0.021                       |      |
| Subject17 | AUC      | 0.104       | 0.112  | 0.117     | 0.134  | 0.115    | 0.060               | 0.101               | 0.038                | 0.036                | 0.006                  | 0.104                  | <b>0.009</b>         | 0.118                | 0.023                 | 0.027                 | 0.041                        | 0.064                        |      |
|           |          | ±0.053      | ±0.050 | ±0.055    | ±0.052 | ±0.073   | ±0.032              | ±0.040              | ±0.040               | ±0.049               | ±0.020                 | ±0.040                 | ± <b>0.021</b>       | ±0.048               | ±0.020                | ±0.027                | ±0.026                       | ±0.036                       |      |
|           | BAcc     | 0.102       | 0.129  | 0.105     | 0.189  | 0.090    | 0.093               | 0.117               | 0.055                | 0.005                | 0.009                  | 0.015                  | 0.016                | 0.113                | 0.071                 | <b>0.008</b>          | 0.092                        | 0.012                        |      |
|           |          | ±0.080      | ±0.091 | ±0.077    | ±0.124 | ±0.083   | ±0.065              | ±0.085              | ±0.049               | ±0.018               | ±0.021                 | ±0.020                 | ±0.029               | ±0.089               | ±0.057                | ± <b>0.019</b>        | ±0.059                       | ±0.020                       |      |
|           | Acc.1    | 0.102       | 0.129  | 0.105     | 0.189  | 0.090    | 0.083               | 0.113               | 0.050                | 0.004                | 0.010                  | 0.033                  | 0.021                | 0.131                | 0.053                 | -0.002                | 0.071                        | <b>0.003</b>                 |      |
|           |          | ±0.080      | ±0.091 | ±0.077    | ±0.124 | ±0.083   | ±0.058              | ±0.080              | ±0.052               | ±0.023               | ±0.026                 | ±0.024                 | ±0.043               | ±0.098               | ±0.058                | ±0.025                | ±0.054                       | ± <b>0.023</b>               |      |
|           | Acc.2    | 0.141       | 0.182  | 0.152     | 0.261  | 0.125    | 0.107               | 0.176               | 0.059                | <b>0.000</b>         | 0.001                  | 0.058                  | 0.025                | 0.186                | 0.052                 | -0.007                | 0.074                        | 0.004                        |      |
|           |          | ±0.100      | ±0.125 | ±0.103    | ±0.156 | ±0.102   | ±0.069              | ±0.110              | ±0.058               | ± <b>0.027</b>       | ±0.035                 | ±0.039                 | ±0.045               | ±0.124               | ±0.056                | ±0.034                | ±0.057                       | ±0.026                       |      |
|           | $\kappa$ | 0.107       | 0.097  | 0.100     | 0.178  | 0.083    | 0.073               | 0.093               | 0.045                | 0.005                | 0.015                  | 0.015                  | 0.020                | 0.130                | 0.071                 | <b>0.007</b>          | 0.083                        | 0.013                        |      |
|           |          | ±0.083      | ±0.078 | ±0.076    | ±0.119 | ±0.072   | ±0.065              | ±0.071              | ±0.052               | ±0.015               | ±0.015                 | ±0.022                 | ±0.025               | ±0.089               | ±0.063                | ± <b>0.013</b>        | ±0.047                       | ±0.018                       |      |
| Subject18 | AUC      | 0.130       | 0.101  | 0.120     | 0.134  | 0.107    | 0.052               | 0.101               | 0.036                | 0.037                | 0.029                  | 0.100                  | 0.022                | 0.157                | 0.040                 | <b>0.029</b>          | 0.039                        | 0.059                        |      |
|           |          | ±0.059      | ±0.045 | ±0.064    | ±0.046 | ±0.068   | ±0.021              | ±0.038              | ±0.037               | ±0.037               | ±0.019                 | ±0.038                 | ±0.013               | ±0.038               | ±0.020                | ± <b>0.032</b>        | ±0.026                       | ±0.034                       |      |
|           | BAcc     | 0.104       | 0.095  | 0.098     | 0.173  | 0.081    | 0.071               | 0.091               | 0.044                | 0.005                | 0.014                  | 0.014                  | 0.020                | 0.127                | 0.070                 | <b>0.007</b>          | 0.081                        | 0.012                        |      |
|           |          | ±0.081      | ±0.076 | ±0.074    | ±0.116 | ±0.070   | ±0.063              | ±0.069              | ±0.051               | ±0.014               | ±0.015                 | ±0.021                 | ±0.024               | ±0.087               | ±0.061                | ± <b>0.013</b>        | ±0.046                       | ±0.017                       |      |
|           | Acc.1    | 0.104       | 0.095  | 0.105     | 0.180  | 0.081    | 0.080               | 0.098               | 0.058                | <b>0.006</b>         | 0.022                  | 0.017                  | 0.022                | 0.145                | 0.098                 | 0.006                 | 0.104                        | 0.013                        |      |
|           |          | ±0.081      | ±0.076 | ±0.078    | ±0.124 | ±0.070   | ±0.059              | ±0.066              | ±0.056               | ± <b>0.017</b>       | ±0.019                 | ±0.029                 | ±0.030               | ±0.100               | ±0.064                | ±0.020                | ±0.060                       | ±0.020                       |      |
|           | Acc.2    | 0.145       | 0.142  | 0.150     | 0.256  | 0.123    | 0.113               | 0.161               | 0.069                | <b>0.010</b>         | 0.038                  | 0.033                  | 0.033                | 0.200                | 0.128                 | 0.008                 | 0.119                        | 0.017                        |      |
|           |          | ±0.100      | ±0.098 | ±0.094    | ±0.154 | ±0.095   | ±0.067              | ±0.100              | ±0.062               | ± <b>0.030</b>       | ±0.036                 | ±0.033                 | ±0.039               | ±0.128               | ±0.059                | ±0.034                | ±0.066                       | ±0.027                       |      |
|           | $\kappa$ | 0.143       | 0.104  | 0.097     | 0.170  | 0.103    | 0.070               | 0.109               | 0.028                | 0.007                | <b>0.005</b>           | 0.012                  | 0.017                | 0.122                | 0.054                 | 0.005                 | 0.082                        | 0.008                        |      |
|           |          | ±0.100      | ±0.083 | ±0.072    | ±0.110 | ±0.095   | ±0.053              | ±0.089              | ±0.041               | ±0.015               | ± <b>0.022</b>         | ±0.018                 | ±0.034               | ±0.093               | ±0.028                | ±0.017                | ±0.054                       | ±0.020                       |      |
| Subject18 | AUC      | 0.095       | 0.083  | 0.097     | 0.109  | 0.139    | 0.044               | 0.122               | 0.019                | 0.046                | 0.008                  | 0.068                  | <b>0.010</b>         | 0.115                | 0.034                 | 0.016                 | 0.042                        | 0.042                        |      |
|           |          | ±0.048      | ±0.045 | ±0.061    | ±0.056 | ±0.085   | ±0.021              | ±0.057              | ±0.019               | ±0.038               | ±0.022                 | ±0.036                 | ± <b>0.022</b>       | ±0.051               | ±0.020                | ±0.024                | ±0.029                       | ±0.026                       |      |

Continued on next page

| Subject   | Metric                 | DeepConvnet     | EEGNet          | Conformer       | CTNet           | SSVEPDNN        | BIOT (f)        | BIOT (l)        | BENDR (f)       | BENDR (l)        | CBraMod (f)                     | CBraMod (l)      | EEGPT (f)        | EEGPT (l)       | LaBraM (f)      | LaBraM (l)                      | STEEGformer-s (f) | STEEGformer-s (l)               |
|-----------|------------------------|-----------------|-----------------|-----------------|-----------------|-----------------|-----------------|-----------------|-----------------|------------------|---------------------------------|------------------|------------------|-----------------|-----------------|---------------------------------|-------------------|---------------------------------|
| Subject1  | BAcc                   | 0.140<br>±0.098 | 0.102<br>±0.081 | 0.095<br>±0.070 | 0.166<br>±0.107 | 0.100<br>±0.092 | 0.069<br>±0.052 | 0.106<br>±0.086 | 0.027<br>±0.040 | 0.007<br>±0.015  | <b>0.005</b><br>± <b>0.022</b>  | 0.012<br>±0.017  | 0.016<br>±0.033  | 0.119<br>±0.091 | 0.052<br>±0.027 | 0.005<br>±0.017                 | 0.080<br>±0.053   | 0.007<br>±0.019                 |
|           | Acc.1                  | 0.140<br>±0.098 | 0.102<br>±0.081 | 0.095<br>±0.070 | 0.166<br>±0.107 | 0.100<br>±0.092 | 0.050<br>±0.052 | 0.105<br>±0.087 | 0.007<br>±0.046 | 0.006<br>±0.014  | <b>-0.009</b><br>± <b>0.029</b> | -0.002<br>±0.025 | 0.003<br>±0.034  | 0.107<br>±0.099 | 0.035<br>±0.031 | 0.000<br>±0.020                 | 0.041<br>±0.054   | -0.014<br>± 0.023               |
|           | Acc.2                  | 0.193<br>±0.126 | 0.143<br>±0.102 | 0.133<br>±0.086 | 0.226<br>±0.132 | 0.147<br>±0.112 | 0.057<br>±0.046 | 0.167<br>±0.112 | 0.008<br>±0.056 | 0.017<br>±0.025  | <b>-0.016</b><br>± <b>0.033</b> | 0.005<br>±0.040  | 0.006<br>±0.053  | 0.154<br>±0.121 | 0.042<br>±0.042 | -0.003<br>±0.033                | 0.058<br>±0.057   | -0.017<br>± 0.024               |
|           | $\kappa$               | 0.116<br>±0.095 | 0.125<br>±0.100 | 0.155<br>±0.113 | 0.190<br>±0.123 | 0.126<br>±0.103 | 0.128<br>±0.092 | 0.122<br>±0.095 | 0.108<br>±0.076 | 0.012<br>±0.024  | 0.021<br>±0.021                 | 0.028<br>±0.021  | 0.040<br>±0.042  | 0.153<br>±0.109 | 0.117<br>±0.080 | 0.006<br>±0.016                 | 0.133<br>±0.100   | <b>0.010</b><br>± <b>0.019</b>  |
|           | AUC                    | 0.092<br>±0.049 | 0.126<br>±0.046 | 0.195<br>±0.074 | 0.130<br>±0.041 | 0.169<br>±0.090 | 0.084<br>±0.043 | 0.131<br>±0.050 | 0.075<br>±0.046 | 0.061<br>±0.045  | <b>0.034</b><br>± <b>0.022</b>  | 0.112<br>±0.040  | 0.046<br>±0.026  | 0.231<br>±0.072 | 0.064<br>±0.021 | 0.030<br>±0.028                 | 0.076<br>±0.046   | 0.051<br>±0.030                 |
|           | BAcc                   | 0.113<br>±0.093 | 0.122<br>±0.098 | 0.151<br>±0.110 | 0.185<br>±0.120 | 0.123<br>±0.101 | 0.125<br>±0.090 | 0.119<br>±0.093 | 0.105<br>±0.074 | 0.012<br>±0.023  | 0.020<br>±0.021                 | 0.027<br>±0.020  | 0.039<br>±0.041  | 0.149<br>±0.106 | 0.114<br>±0.078 | 0.006<br>±0.016                 | 0.130<br>±0.098   | <b>0.010</b><br>± <b>0.019</b>  |
| Subject19 | Acc.1                  | 0.106<br>±0.089 | 0.122<br>±0.098 | 0.151<br>±0.110 | 0.155<br>±0.107 | 0.123<br>±0.101 | 0.075<br>±0.069 | 0.091<br>±0.085 | 0.105<br>±0.077 | 0.017<br>±0.027  | 0.011<br>±0.026                 | 0.031<br>±0.036  | 0.041<br>±0.046  | 0.158<br>±0.118 | 0.097<br>±0.073 | <b>-0.010</b><br>± <b>0.020</b> | 0.087<br>±0.088   | -0.017<br>± 0.027               |
|           | Acc.2                  | 0.148<br>±0.102 | 0.183<br>±0.125 | 0.232<br>±0.143 | 0.211<br>±0.147 | 0.179<br>±0.122 | 0.111<br>±0.089 | 0.153<br>±0.117 | 0.135<br>±0.092 | 0.036<br>±0.037  | 0.016<br>±0.036                 | 0.054<br>±0.053  | 0.044<br>±0.048  | 0.221<br>±0.152 | 0.117<br>±0.063 | <b>-0.013</b><br>± <b>0.026</b> | 0.102<br>±0.095   | -0.019<br>± 0.042               |
|           | $\kappa$               | 0.141<br>±0.095 | 0.139<br>±0.102 | 0.161<br>±0.110 | 0.215<br>±0.140 | 0.130<br>±0.108 | 0.082<br>±0.070 | 0.113<br>±0.085 | 0.108<br>±0.074 | 0.006<br>±0.017  | 0.001<br>± 0.021                | 0.013<br>±0.022  | 0.029<br>±0.036  | 0.122<br>±0.088 | 0.098<br>±0.057 | <b>0.002</b><br>± <b>0.020</b>  | 0.126<br>±0.070   | 0.010<br>±0.019                 |
|           | AUC                    | 0.153<br>±0.056 | 0.168<br>±0.066 | 0.215<br>±0.074 | 0.176<br>±0.063 | 0.182<br>±0.089 | 0.046<br>±0.026 | 0.140<br>±0.049 | 0.074<br>±0.034 | 0.043<br>±0.047  | 0.010<br>± 0.023                | 0.091<br>±0.037  | 0.021<br>±0.025  | 0.134<br>±0.055 | 0.035<br>±0.023 | <b>0.020</b><br>± <b>0.029</b>  | 0.073<br>±0.038   | 0.053<br>±0.033                 |
|           | BAcc                   | 0.138<br>±0.092 | 0.135<br>±0.099 | 0.157<br>±0.107 | 0.209<br>±0.136 | 0.127<br>±0.105 | 0.080<br>±0.068 | 0.111<br>±0.083 | 0.105<br>±0.072 | 0.006<br>±0.017  | 0.001<br>± 0.020                | 0.012<br>±0.022  | 0.028<br>±0.035  | 0.119<br>±0.085 | 0.095<br>±0.056 | <b>0.002</b><br>± <b>0.020</b>  | 0.123<br>±0.069   | 0.009<br>±0.018                 |
|           | Acc.1                  | 0.138<br>±0.092 | 0.135<br>±0.099 | 0.157<br>±0.107 | 0.207<br>±0.140 | 0.127<br>±0.105 | 0.082<br>±0.076 | 0.109<br>±0.084 | 0.096<br>±0.067 | 0.005<br>±0.023  | 0.004<br>±0.037                 | 0.028<br>±0.034  | 0.032<br>±0.044  | 0.125<br>±0.096 | 0.104<br>±0.071 | -0.008<br>± 0.024               | 0.133<br>±0.084   | <b>-0.002</b><br>± <b>0.028</b> |
| Subject2  | Acc.2                  | 0.189<br>±0.111 | 0.206<br>±0.146 | 0.227<br>±0.138 | 0.297<br>±0.186 | 0.188<br>±0.143 | 0.109<br>±0.083 | 0.191<br>±0.141 | 0.125<br>±0.079 | 0.011<br>±0.029  | 0.021<br>±0.035                 | 0.051<br>±0.050  | 0.041<br>±0.059  | 0.191<br>±0.130 | 0.122<br>±0.072 | -0.008<br>± 0.032               | 0.170<br>±0.108   | <b>0.001</b><br>± <b>0.036</b>  |
|           | $\kappa$               | 0.180<br>±0.137 | 0.128<br>±0.095 | 0.117<br>±0.092 | 0.184<br>±0.116 | 0.105<br>±0.080 | 0.083<br>±0.057 | 0.092<br>±0.067 | 0.079<br>±0.067 | 0.008<br>± 0.013 | 0.012<br>±0.028                 | 0.020<br>±0.022  | 0.020<br>±0.028  | 0.113<br>±0.083 | 0.082<br>±0.060 | 0.010<br>±0.022                 | 0.110<br>±0.084   | <b>0.009</b><br>± <b>0.017</b>  |
|           | AUC                    | 0.154<br>±0.085 | 0.129<br>±0.062 | 0.133<br>±0.064 | 0.128<br>±0.052 | 0.137<br>±0.072 | 0.047<br>±0.026 | 0.093<br>±0.035 | 0.063<br>±0.043 | 0.038<br>±0.036  | <b>0.011</b><br>± <b>0.022</b>  | 0.097<br>±0.038  | 0.009<br>± 0.018 | 0.106<br>±0.031 | 0.023<br>±0.021 | 0.024<br>±0.027                 | 0.060<br>±0.038   | 0.042<br>±0.033                 |
|           | BAcc                   | 0.175<br>±0.133 | 0.125<br>±0.093 | 0.114<br>±0.090 | 0.180<br>±0.113 | 0.102<br>±0.078 | 0.081<br>±0.055 | 0.090<br>±0.065 | 0.077<br>±0.066 | 0.008<br>± 0.013 | 0.011<br>±0.027                 | 0.019<br>±0.022  | 0.020<br>±0.027  | 0.110<br>±0.081 | 0.080<br>±0.058 | 0.009<br>±0.021                 | 0.107<br>±0.082   | <b>0.009</b><br>± <b>0.016</b>  |
|           | Continued on next page |                 |                 |                 |                 |                 |                 |                 |                 |                  |                                 |                  |                  |                 |                 |                                 |                   |                                 |

| Subject   | Metric   | DeepConvnet | EEGNet | Conformer | CTNet  | SSVEPDNN | BIOT (f) | BIOT (l) | BENDR (f) | BENDR (l) | CBraMod (f) | CBraMod (l) | EEGPT (f) | EEGPT (l) | LaBraM (f) | LaBraM (l) | STEEGformer-s (f) | STEEGformer-s (l) |
|-----------|----------|-------------|--------|-----------|--------|----------|----------|----------|-----------|-----------|-------------|-------------|-----------|-----------|------------|------------|-------------------|-------------------|
| Subject21 | Acc.1    | 0.175       | 0.125  | 0.063     | 0.154  | 0.102    | 0.050    | 0.080    | 0.059     | 0.008     | −0.006      | 0.014       | 0.008     | 0.092     | 0.040      | −0.003     | 0.068             | −0.016            |
|           |          | ±0.133      | ±0.093 | ±0.072    | ±0.105 | ±0.078   | ±0.060   | ±0.071   | ±0.067    | ±0.015    | ±0.035      | ±0.037      | ±0.032    | ±0.083    | ±0.050     | ±0.024     | ±0.071            | ±0.026            |
|           | Acc.2    | 0.246       | 0.179  | 0.085     | 0.206  | 0.151    | 0.065    | 0.134    | 0.074     | 0.012     | −0.022      | 0.013       | −0.002    | 0.120     | 0.053      | −0.012     | 0.094             | −0.027            |
|           |          | ±0.172      | ±0.124 | ±0.091    | ±0.136 | ±0.104   | ±0.070   | ±0.103   | ±0.081    | ±0.023    | ±0.035      | ±0.040      | ±0.031    | ±0.093    | ±0.064     | ±0.032     | ±0.075            | ±0.038            |
|           | $\kappa$ | 0.087       | 0.120  | 0.094     | 0.179  | 0.098    | 0.067    | 0.096    | 0.056     | 0.008     | 0.005       | 0.018       | 0.037     | 0.109     | 0.095      | 0.010      | 0.090             | 0.008             |
|           |          | ±0.061      | ±0.094 | ±0.074    | ±0.116 | ±0.083   | ±0.058   | ±0.072   | ±0.064    | ±0.017    | ±0.026      | ±0.019      | ±0.038    | ±0.078    | ±0.072     | ±0.016     | ±0.063            | ±0.016            |
| Subject22 | AUC      | 0.104       | 0.120  | 0.114     | 0.132  | 0.127    | 0.038    | 0.108    | 0.039     | 0.040     | 0.021       | 0.055       | 0.039     | 0.127     | 0.052      | 0.035      | 0.049             | 0.044             |
|           |          | ±0.053      | ±0.054 | ±0.070    | ±0.062 | ±0.069   | ±0.026   | ±0.044   | ±0.045    | ±0.038    | ±0.012      | ±0.028      | ±0.021    | ±0.044    | ±0.025     | ±0.034     | ±0.033            | ±0.024            |
|           | BAcc     | 0.085       | 0.117  | 0.091     | 0.174  | 0.096    | 0.065    | 0.094    | 0.055     | 0.008     | 0.005       | 0.018       | 0.036     | 0.106     | 0.093      | 0.010      | 0.088             | 0.008             |
|           |          | ±0.059      | ±0.091 | ±0.072    | ±0.113 | ±0.081   | ±0.057   | ±0.070   | ±0.063    | ±0.016    | ±0.025      | ±0.018      | ±0.037    | ±0.076    | ±0.071     | ±0.015     | ±0.061            | ±0.016            |
|           | Acc.1    | 0.085       | 0.114  | 0.072     | 0.185  | 0.096    | 0.071    | 0.101    | 0.050     | 0.011     | 0.010       | 0.029       | 0.049     | 0.108     | 0.092      | 0.015      | 0.085             | −0.011            |
|           |          | ±0.060      | ±0.090 | ±0.059    | ±0.114 | ±0.081   | ±0.059   | ±0.078   | ±0.065    | ±0.021    | ±0.030      | ±0.029      | ±0.044    | ±0.085    | ±0.079     | ±0.018     | ±0.067            | ±0.026            |
| Subject23 | Acc.2    | 0.135       | 0.159  | 0.106     | 0.261  | 0.142    | 0.085    | 0.163    | 0.075     | 0.013     | 0.018       | 0.043       | 0.056     | 0.158     | 0.104      | 0.028      | 0.102             | 0.002             |
|           |          | ±0.082      | ±0.109 | ±0.073    | ±0.161 | ±0.114   | ±0.069   | ±0.110   | ±0.086    | ±0.027    | ±0.039      | ±0.036      | ±0.053    | ±0.109    | ±0.086     | ±0.024     | ±0.072            | ±0.035            |
|           | $\kappa$ | 0.080       | 0.089  | 0.079     | 0.159  | 0.109    | 0.078    | 0.089    | 0.043     | 0.013     | 0.013       | 0.027       | 0.009     | 0.110     | 0.078      | 0.006      | 0.070             | 0.011             |
|           |          | ±0.056      | ±0.069 | ±0.050    | ±0.105 | ±0.082   | ±0.058   | ±0.058   | ±0.055    | ±0.020    | ±0.022      | ±0.021      | ±0.028    | ±0.062    | ±0.057     | ±0.016     | ±0.060            | ±0.019            |
|           | AUC      | 0.093       | 0.093  | 0.101     | 0.120  | 0.139    | 0.032    | 0.116    | 0.039     | 0.046     | 0.016       | 0.121       | 0.009     | 0.132     | 0.034      | 0.014      | 0.038             | 0.045             |
|           |          | ±0.052      | ±0.043 | ±0.063    | ±0.047 | ±0.066   | ±0.022   | ±0.041   | ±0.028    | ±0.039    | ±0.018      | ±0.044      | ±0.021    | ±0.045    | ±0.025     | ±0.030     | ±0.030            | ±0.031            |
| Subject24 | BAcc     | 0.078       | 0.087  | 0.077     | 0.155  | 0.107    | 0.076    | 0.087    | 0.041     | 0.012     | 0.012       | 0.026       | 0.009     | 0.108     | 0.076      | 0.006      | 0.068             | 0.011             |
|           |          | ±0.055      | ±0.067 | ±0.049    | ±0.103 | ±0.080   | ±0.057   | ±0.057   | ±0.054    | ±0.019    | ±0.022      | ±0.021      | ±0.028    | ±0.061    | ±0.055     | ±0.015     | ±0.059            | ±0.019            |
|           | Acc.1    | 0.078       | 0.087  | 0.078     | 0.155  | 0.107    | 0.085    | 0.095    | 0.038     | 0.008     | 0.017       | 0.033       | 0.005     | 0.118     | 0.093      | 0.007      | 0.079             | 0.010             |
|           |          | ±0.055      | ±0.067 | ±0.049    | ±0.103 | ±0.080   | ±0.057   | ±0.064   | ±0.059    | ±0.024    | ±0.028      | ±0.032      | ±0.038    | ±0.069    | ±0.067     | ±0.012     | ±0.077            | ±0.026            |
|           | Acc.2    | 0.111       | 0.131  | 0.107     | 0.213  | 0.151    | 0.089    | 0.164    | 0.069     | 0.014     | 0.025       | 0.046       | 0.012     | 0.168     | 0.104      | 0.012      | 0.092             | 0.015             |
|           |          | ±0.073      | ±0.077 | ±0.071    | ±0.132 | ±0.095   | ±0.053   | ±0.094   | ±0.075    | ±0.032    | ±0.030      | ±0.049      | ±0.041    | ±0.084    | ±0.067     | ±0.024     | ±0.082            | ±0.039            |
| Subject25 | $\kappa$ | 0.234       | 0.180  | 0.168     | 0.248  | 0.140    | 0.209    | 0.173    | 0.179     | 0.008     | 0.018       | 0.023       | 0.051     | 0.150     | 0.180      | 0.006      | 0.189             | 0.010             |
|           |          | ±0.170      | ±0.127 | ±0.110    | ±0.156 | ±0.098   | ±0.137   | ±0.123   | ±0.110    | ±0.021    | ±0.021      | ±0.022      | ±0.063    | ±0.105    | ±0.093     | ±0.015     | ±0.104            | ±0.017            |
|           | AUC      | 0.235       | 0.227  | 0.239     | 0.247  | 0.214    | 0.155    | 0.244    | 0.135     | 0.047     | 0.020       | 0.119       | 0.064     | 0.203     | 0.101      | 0.034      | 0.121             | 0.067             |
|           |          | ±0.077      | ±0.085 | ±0.072    | ±0.082 | ±0.088   | ±0.061   | ±0.092   | ±0.046    | ±0.045    | ±0.020      | ±0.044      | ±0.042    | ±0.080    | ±0.031     | ±0.035     | ±0.050            | ±0.031            |
|           | BAcc     | 0.228       | 0.176  | 0.164     | 0.242  | 0.137    | 0.204    | 0.169    | 0.174     | 0.008     | 0.018       | 0.022       | 0.050     | 0.146     | 0.175      | 0.006      | 0.184             | 0.010             |
|           |          | ±0.166      | ±0.123 | ±0.107    | ±0.152 | ±0.096   | ±0.133   | ±0.120   | ±0.108    | ±0.021    | ±0.020      | ±0.022      | ±0.061    | ±0.102    | ±0.091     | ±0.015     | ±0.101            | ±0.017            |
| Subject26 | Acc.1    | 0.228       | 0.176  | 0.164     | 0.246  | 0.137    | 0.210    | 0.174    | 0.175     | 0.007     | 0.034       | 0.042       | 0.057     | 0.156     | 0.193      | 0.004      | 0.223             | 0.013             |
|           |          | ±0.166      | ±0.123 | ±0.107    | ±0.152 | ±0.096   | ±0.129   | ±0.121   | ±0.108    | ±0.024    | ±0.031      | ±0.036      | ±0.077    | ±0.116    | ±0.096     | ±0.022     | ±0.122            | ±0.018            |

Continued on next page

| Subject   | Metric   | DeepConvnet     | EEGNet          | Conformer       | CTNet           | SSVEPDNN        | BIOT <sup>(f)</sup> | BIOT <sup>(l)</sup> | BENDR <sup>(f)</sup> | BENDR <sup>(l)</sup>           | CBraMod <sup>(f)</sup>           | CBraMod <sup>(l)</sup>         | EEGPT <sup>(f)</sup>           | EEGPT <sup>(l)</sup> | LaBraM <sup>(f)</sup> | LaBraM <sup>(l)</sup>          | STEEGformer-s <sup>(f)</sup> | STEEGformer-s <sup>(l)</sup>     |
|-----------|----------|-----------------|-----------------|-----------------|-----------------|-----------------|---------------------|---------------------|----------------------|--------------------------------|----------------------------------|--------------------------------|--------------------------------|----------------------|-----------------------|--------------------------------|------------------------------|----------------------------------|
| Subject24 | Acc.2    | 0.322<br>±0.203 | 0.268<br>±0.171 | 0.234<br>±0.146 | 0.357<br>±0.203 | 0.201<br>±0.133 | 0.293<br>±0.147     | 0.281<br>±0.188     | 0.220<br>±0.121      | <b>0.016</b><br>± <b>0.034</b> | 0.049<br>±0.046                  | 0.069<br>±0.060                | 0.065<br>±0.077                | 0.225<br>±0.154      | 0.228<br>±0.101       | 0.006<br>± 0.031               | 0.287<br>±0.131              | 0.030<br>±0.031                  |
|           | $\kappa$ | 0.178<br>±0.127 | 0.156<br>±0.115 | 0.157<br>±0.105 | 0.231<br>±0.156 | 0.140<br>±0.106 | 0.113<br>±0.081     | 0.117<br>±0.090     | 0.102<br>±0.071      | 0.010<br>±0.018                | <b>0.008</b><br>± <b>0.023</b>   | 0.022<br>±0.018                | 0.035<br>±0.044                | 0.132<br>±0.096      | 0.122<br>±0.081       | 0.008<br>± 0.016               | 0.142<br>±0.085              | 0.010<br>±0.021                  |
|           | AUC      | 0.192<br>±0.072 | 0.184<br>±0.075 | 0.211<br>±0.080 | 0.195<br>±0.067 | 0.196<br>±0.094 | 0.064<br>±0.036     | 0.121<br>±0.048     | 0.077<br>±0.035      | 0.045<br>±0.043                | 0.017<br>± 0.018                 | 0.087<br>±0.043                | <b>0.024</b><br>± <b>0.028</b> | 0.131<br>±0.059      | 0.060<br>±0.024       | 0.025<br>±0.031                | 0.092<br>±0.041              | 0.048<br>±0.034                  |
|           | BAcc     | 0.173<br>±0.123 | 0.152<br>±0.112 | 0.153<br>±0.102 | 0.225<br>±0.152 | 0.136<br>±0.104 | 0.110<br>±0.079     | 0.114<br>±0.088     | 0.099<br>±0.069      | 0.010<br>±0.018                | <b>0.008</b><br>± <b>0.023</b>   | 0.021<br>±0.017                | 0.034<br>±0.043                | 0.129<br>±0.094      | 0.119<br>±0.079       | 0.007<br>± 0.016               | 0.138<br>±0.083              | 0.010<br>±0.021                  |
|           | Acc.1    | 0.173<br>±0.123 | 0.152<br>±0.112 | 0.153<br>±0.102 | 0.194<br>±0.131 | 0.136<br>±0.104 | 0.080<br>±0.066     | 0.094<br>±0.075     | 0.082<br>±0.060      | 0.006<br>±0.021                | -0.018<br>± 0.031                | 0.006<br>±0.028                | 0.029<br>±0.051                | 0.128<br>±0.101      | 0.062<br>±0.060       | 0.000<br>±0.020                | 0.079<br>±0.059              | - <b>0.016</b><br>± <b>0.025</b> |
|           | Acc.2    | 0.251<br>±0.155 | 0.234<br>±0.156 | 0.232<br>±0.140 | 0.271<br>±0.170 | 0.198<br>±0.136 | 0.113<br>±0.072     | 0.170<br>±0.120     | 0.120<br>±0.079      | 0.008<br>±0.028                | - <b>0.020</b><br>± <b>0.035</b> | 0.013<br>±0.035                | 0.028<br>±0.055                | 0.175<br>±0.129      | 0.076<br>±0.059       | -0.007<br>±0.028               | 0.094<br>±0.075              | -0.031<br>± 0.032                |
|           | $\kappa$ | 0.225<br>±0.157 | 0.166<br>±0.117 | 0.178<br>±0.124 | 0.247<br>±0.146 | 0.129<br>±0.105 | 0.164<br>±0.107     | 0.145<br>±0.110     | 0.113<br>±0.079      | 0.011<br>±0.021                | 0.026<br>±0.022                  | <b>0.010</b><br>± <b>0.023</b> | 0.053<br>±0.055                | 0.137<br>±0.114      | 0.130<br>±0.074       | 0.006<br>± 0.015               | 0.148<br>±0.079              | 0.012<br>±0.021                  |
| Subject25 | AUC      | 0.222<br>±0.081 | 0.190<br>±0.072 | 0.245<br>±0.089 | 0.232<br>±0.079 | 0.189<br>±0.097 | 0.115<br>±0.047     | 0.200<br>±0.077     | 0.067<br>±0.034      | 0.065<br>±0.057                | <b>0.037</b><br>± <b>0.019</b>   | 0.065<br>±0.044                | 0.060<br>±0.038                | 0.155<br>±0.080      | 0.038<br>±0.025       | 0.019<br>± 0.029               | 0.084<br>±0.030              | 0.072<br>±0.036                  |
|           | BAcc     | 0.219<br>±0.153 | 0.162<br>±0.114 | 0.174<br>±0.121 | 0.241<br>±0.143 | 0.126<br>±0.102 | 0.160<br>±0.104     | 0.142<br>±0.107     | 0.110<br>±0.077      | 0.011<br>±0.020                | 0.025<br>±0.022                  | <b>0.010</b><br>± <b>0.022</b> | 0.052<br>±0.053                | 0.134<br>±0.111      | 0.127<br>±0.072       | 0.006<br>± 0.015               | 0.144<br>±0.077              | 0.012<br>±0.021                  |
|           | Acc.1    | 0.219<br>±0.153 | 0.162<br>±0.114 | 0.174<br>±0.121 | 0.251<br>±0.142 | 0.126<br>±0.102 | 0.177<br>±0.107     | 0.144<br>±0.107     | 0.102<br>±0.074      | 0.012<br>± 0.028               | 0.040<br>±0.027                  | 0.031<br>±0.034                | 0.062<br>±0.062                | 0.146<br>±0.122      | 0.147<br>±0.069       | <b>0.014</b><br>± <b>0.014</b> | 0.157<br>±0.086              | 0.015<br>±0.023                  |
|           | Acc.2    | 0.314<br>±0.191 | 0.250<br>±0.162 | 0.256<br>±0.167 | 0.366<br>±0.195 | 0.191<br>±0.137 | 0.240<br>±0.128     | 0.233<br>±0.167     | 0.129<br>±0.079      | 0.019<br>± 0.036               | 0.063<br>±0.041                  | 0.044<br>±0.043                | 0.087<br>±0.079                | 0.218<br>±0.153      | 0.168<br>±0.070       | 0.030<br>±0.027                | 0.215<br>±0.099              | <b>0.029</b><br>± <b>0.038</b>   |
|           | $\kappa$ | 0.134<br>±0.086 | 0.144<br>±0.101 | 0.141<br>±0.096 | 0.193<br>±0.122 | 0.100<br>±0.088 | 0.103<br>±0.070     | 0.123<br>±0.088     | 0.047<br>±0.056      | 0.009<br>±0.015                | 0.004<br>± 0.016                 | 0.019<br>±0.019                | 0.021<br>±0.029                | 0.118<br>±0.088      | 0.087<br>±0.061       | <b>0.006</b><br>± <b>0.016</b> | 0.107<br>±0.066              | 0.012<br>±0.020                  |
| Subject26 | AUC      | 0.125<br>±0.049 | 0.129<br>±0.057 | 0.147<br>±0.047 | 0.142<br>±0.065 | 0.128<br>±0.067 | 0.076<br>±0.037     | 0.130<br>±0.051     | 0.032<br>±0.039      | 0.036<br>±0.037                | 0.009<br>±0.017                  | 0.069<br>±0.033                | <b>0.029</b><br>± <b>0.019</b> | 0.126<br>±0.044      | 0.033<br>±0.024       | 0.030<br>±0.026                | 0.044<br>±0.030              | 0.054<br>±0.033                  |
|           | BAcc     | 0.131<br>±0.084 | 0.140<br>±0.098 | 0.137<br>±0.094 | 0.188<br>±0.119 | 0.098<br>±0.085 | 0.100<br>±0.069     | 0.120<br>±0.086     | 0.046<br>±0.055      | 0.009<br>±0.014                | 0.004<br>± 0.016                 | 0.019<br>±0.019                | 0.020<br>±0.028                | 0.115<br>±0.086      | 0.085<br>±0.059       | <b>0.006</b><br>± <b>0.016</b> | 0.105<br>±0.065              | 0.012<br>±0.020                  |
|           | Acc.1    | 0.131<br>±0.084 | 0.140<br>±0.098 | 0.137<br>±0.094 | 0.188<br>±0.119 | 0.098<br>±0.085 | 0.111<br>±0.066     | 0.132<br>±0.084     | 0.042<br>±0.059      | <b>0.009</b><br>± <b>0.016</b> | 0.008<br>± 0.024                 | 0.028<br>±0.029                | 0.020<br>±0.034                | 0.124<br>±0.093      | 0.085<br>±0.063       | 0.009<br>±0.014                | 0.109<br>±0.075              | 0.011<br>±0.025                  |
|           | Acc.2    | 0.188<br>±0.111 | 0.207<br>±0.133 | 0.193<br>±0.112 | 0.267<br>±0.161 | 0.153<br>±0.107 | 0.141<br>±0.078     | 0.208<br>±0.125     | 0.059<br>±0.074      | 0.014<br>±0.023                | 0.011<br>± 0.033                 | 0.034<br>±0.034                | 0.032<br>±0.040                | 0.180<br>±0.118      | 0.099<br>±0.073       | <b>0.012</b><br>± <b>0.022</b> | 0.128<br>±0.081              | 0.018<br>±0.030                  |
|           | $\kappa$ | 0.134<br>±0.086 | 0.144<br>±0.101 | 0.141<br>±0.096 | 0.193<br>±0.122 | 0.100<br>±0.088 | 0.103<br>±0.070     | 0.123<br>±0.088     | 0.047<br>±0.056      | 0.009<br>±0.015                | 0.004<br>± 0.016                 | 0.019<br>±0.019                | 0.021<br>±0.029                | 0.118<br>±0.088      | 0.087<br>±0.061       | <b>0.006</b><br>± <b>0.016</b> | 0.107<br>±0.066              | 0.012<br>±0.020                  |
|           | AUC      | 0.125<br>±0.049 | 0.129<br>±0.057 | 0.147<br>±0.047 | 0.142<br>±0.065 | 0.128<br>±0.067 | 0.076<br>±0.037     | 0.130<br>±0.051     | 0.032<br>±0.039      | 0.036<br>±0.037                | 0.009<br>±0.017                  | 0.069<br>±0.033                | <b>0.029</b><br>± <b>0.019</b> | 0.126<br>±0.044      | 0.033<br>±0.024       | 0.030<br>±0.026                | 0.044<br>±0.030              | 0.054<br>±0.033                  |

Continued on next page

| Subject   | Metric   | DeepConvnet          | EEGNet               | Conformer            | CTNet                | SSVEPDNN             | BIOT (f)             | BIOT (l)             | BENDR (f)            | BENDR (l)                          | CBraMod (f)                        | CBraMod (l)          | EEGPT (f)            | EEGPT (l)            | LaBraM (f)           | LaBraM (l)                         | STEEGformer-s (f)    | STEEGformer-s (l)                  |
|-----------|----------|----------------------|----------------------|----------------------|----------------------|----------------------|----------------------|----------------------|----------------------|------------------------------------|------------------------------------|----------------------|----------------------|----------------------|----------------------|------------------------------------|----------------------|------------------------------------|
| Subject27 | $\kappa$ | 0.188<br>$\pm 0.128$ | 0.110<br>$\pm 0.088$ | 0.136<br>$\pm 0.094$ | 0.191<br>$\pm 0.121$ | 0.118<br>$\pm 0.095$ | 0.121<br>$\pm 0.079$ | 0.121<br>$\pm 0.087$ | 0.050<br>$\pm 0.052$ | <b>0.007</b><br>$\pm$ <b>0.012</b> | 0.006<br>$\pm 0.019$               | 0.018<br>$\pm 0.025$ | 0.035<br>$\pm 0.043$ | 0.127<br>$\pm 0.095$ | 0.096<br>$\pm 0.067$ | 0.008<br>$\pm 0.019$               | 0.157<br>$\pm 0.097$ | 0.016<br>$\pm 0.019$               |
|           | AUC      | 0.134<br>$\pm 0.063$ | 0.116<br>$\pm 0.049$ | 0.160<br>$\pm 0.064$ | 0.149<br>$\pm 0.054$ | 0.158<br>$\pm 0.069$ | 0.068<br>$\pm 0.036$ | 0.135<br>$\pm 0.048$ | 0.037<br>$\pm 0.048$ | 0.043<br>$\pm 0.039$               | 0.008<br>$\pm 0.020$               | 0.083<br>$\pm 0.046$ | 0.034<br>$\pm 0.023$ | 0.136<br>$\pm 0.048$ | 0.046<br>$\pm 0.025$ | <b>0.032</b><br>$\pm$ <b>0.036</b> | 0.088<br>$\pm 0.042$ | 0.084<br>$\pm 0.039$               |
|           | BAcc     | 0.183<br>$\pm 0.125$ | 0.108<br>$\pm 0.086$ | 0.133<br>$\pm 0.091$ | 0.186<br>$\pm 0.118$ | 0.115<br>$\pm 0.093$ | 0.118<br>$\pm 0.077$ | 0.118<br>$\pm 0.084$ | 0.049<br>$\pm 0.051$ | <b>0.007</b><br>$\pm$ <b>0.011</b> | 0.006<br>$\pm 0.019$               | 0.017<br>$\pm 0.025$ | 0.034<br>$\pm 0.042$ | 0.124<br>$\pm 0.093$ | 0.093<br>$\pm 0.066$ | 0.007<br>$\pm 0.019$               | 0.153<br>$\pm 0.094$ | 0.015<br>$\pm 0.018$               |
|           | Acc.1    | 0.183<br>$\pm 0.125$ | 0.108<br>$\pm 0.086$ | 0.133<br>$\pm 0.091$ | 0.208<br>$\pm 0.128$ | 0.115<br>$\pm 0.093$ | 0.128<br>$\pm 0.090$ | 0.123<br>$\pm 0.090$ | 0.046<br>$\pm 0.051$ | 0.007<br>$\pm 0.014$               | 0.010<br>$\pm 0.031$               | 0.028<br>$\pm 0.038$ | 0.037<br>$\pm 0.044$ | 0.143<br>$\pm 0.109$ | 0.097<br>$\pm 0.072$ | 0.012<br>$\pm 0.018$               | 0.182<br>$\pm 0.100$ | <b>0.008</b><br>$\pm$ <b>0.024</b> |
|           | Acc.2    | 0.233<br>$\pm 0.146$ | 0.166<br>$\pm 0.122$ | 0.193<br>$\pm 0.115$ | 0.282<br>$\pm 0.166$ | 0.171<br>$\pm 0.117$ | 0.169<br>$\pm 0.092$ | 0.183<br>$\pm 0.122$ | 0.063<br>$\pm 0.062$ | 0.008<br>$\pm 0.025$               | 0.015<br>$\pm 0.036$               | 0.057<br>$\pm 0.042$ | 0.051<br>$\pm 0.047$ | 0.194<br>$\pm 0.129$ | 0.109<br>$\pm 0.066$ | 0.017<br>$\pm 0.025$               | 0.217<br>$\pm 0.108$ | <b>0.015</b><br>$\pm$ <b>0.033</b> |
| Subject28 | $\kappa$ | 0.151<br>$\pm 0.104$ | 0.157<br>$\pm 0.117$ | 0.169<br>$\pm 0.118$ | 0.229<br>$\pm 0.154$ | 0.136<br>$\pm 0.110$ | 0.128<br>$\pm 0.085$ | 0.133<br>$\pm 0.095$ | 0.099<br>$\pm 0.066$ | 0.005<br>$\pm 0.019$               | 0.011<br>$\pm 0.016$               | 0.021<br>$\pm 0.017$ | 0.041<br>$\pm 0.044$ | 0.138<br>$\pm 0.094$ | 0.124<br>$\pm 0.075$ | <b>0.006</b><br>$\pm$ <b>0.019</b> | 0.146<br>$\pm 0.083$ | 0.010<br>$\pm 0.021$               |
|           | AUC      | 0.172<br>$\pm 0.057$ | 0.178<br>$\pm 0.066$ | 0.214<br>$\pm 0.069$ | 0.206<br>$\pm 0.064$ | 0.192<br>$\pm 0.086$ | 0.071<br>$\pm 0.029$ | 0.154<br>$\pm 0.048$ | 0.066<br>$\pm 0.032$ | 0.041<br>$\pm 0.037$               | 0.018<br>$\pm 0.015$               | 0.105<br>$\pm 0.024$ | 0.031<br>$\pm 0.019$ | 0.171<br>$\pm 0.050$ | 0.061<br>$\pm 0.025$ | <b>0.026</b><br>$\pm$ <b>0.022</b> | 0.090<br>$\pm 0.037$ | 0.056<br>$\pm 0.034$               |
|           | BAcc     | 0.147<br>$\pm 0.101$ | 0.153<br>$\pm 0.114$ | 0.164<br>$\pm 0.115$ | 0.224<br>$\pm 0.150$ | 0.133<br>$\pm 0.108$ | 0.125<br>$\pm 0.083$ | 0.130<br>$\pm 0.093$ | 0.097<br>$\pm 0.064$ | 0.005<br>$\pm 0.018$               | 0.011<br>$\pm 0.015$               | 0.020<br>$\pm 0.017$ | 0.040<br>$\pm 0.043$ | 0.135<br>$\pm 0.092$ | 0.120<br>$\pm 0.074$ | <b>0.006</b><br>$\pm$ <b>0.019</b> | 0.142<br>$\pm 0.081$ | 0.009<br>$\pm 0.020$               |
|           | Acc.1    | 0.147<br>$\pm 0.101$ | 0.153<br>$\pm 0.114$ | 0.167<br>$\pm 0.116$ | 0.217<br>$\pm 0.144$ | 0.133<br>$\pm 0.108$ | 0.112<br>$\pm 0.068$ | 0.136<br>$\pm 0.094$ | 0.084<br>$\pm 0.053$ | 0.005<br>$\pm 0.021$               | <b>0.005</b><br>$\pm$ <b>0.026</b> | 0.014<br>$\pm 0.024$ | 0.036<br>$\pm 0.047$ | 0.133<br>$\pm 0.101$ | 0.087<br>$\pm 0.061$ | 0.007<br>$\pm 0.022$               | 0.108<br>$\pm 0.068$ | 0.006<br>$\pm 0.028$               |
|           | Acc.2    | 0.207<br>$\pm 0.129$ | 0.225<br>$\pm 0.156$ | 0.247<br>$\pm 0.152$ | 0.327<br>$\pm 0.189$ | 0.197<br>$\pm 0.145$ | 0.160<br>$\pm 0.091$ | 0.210<br>$\pm 0.128$ | 0.104<br>$\pm 0.074$ | <b>0.013</b><br>$\pm$ <b>0.036</b> | 0.006<br>$\pm 0.037$               | 0.036<br>$\pm 0.041$ | 0.038<br>$\pm 0.050$ | 0.184<br>$\pm 0.124$ | 0.111<br>$\pm 0.066$ | 0.014<br>$\pm 0.031$               | 0.138<br>$\pm 0.081$ | 0.014<br>$\pm 0.038$               |
| Subject29 | $\kappa$ | 0.172<br>$\pm 0.111$ | 0.151<br>$\pm 0.106$ | 0.152<br>$\pm 0.110$ | 0.240<br>$\pm 0.155$ | 0.148<br>$\pm 0.111$ | 0.116<br>$\pm 0.067$ | 0.146<br>$\pm 0.100$ | 0.082<br>$\pm 0.052$ | <b>0.009</b><br>$\pm$ <b>0.020</b> | 0.020<br>$\pm 0.019$               | 0.013<br>$\pm 0.023$ | 0.036<br>$\pm 0.047$ | 0.132<br>$\pm 0.112$ | 0.098<br>$\pm 0.056$ | 0.005<br>$\pm 0.020$               | 0.120<br>$\pm 0.064$ | 0.013<br>$\pm 0.018$               |
|           | AUC      | 0.173<br>$\pm 0.061$ | 0.180<br>$\pm 0.068$ | 0.204<br>$\pm 0.063$ | 0.226<br>$\pm 0.086$ | 0.203<br>$\pm 0.090$ | 0.087<br>$\pm 0.024$ | 0.165<br>$\pm 0.054$ | 0.056<br>$\pm 0.024$ | 0.055<br>$\pm 0.051$               | 0.017<br>$\pm 0.022$               | 0.078<br>$\pm 0.045$ | 0.035<br>$\pm 0.026$ | 0.131<br>$\pm 0.071$ | 0.034<br>$\pm 0.021$ | <b>0.023</b><br>$\pm$ <b>0.038</b> | 0.084<br>$\pm 0.030$ | 0.072<br>$\pm 0.047$               |
|           | BAcc     | 0.168<br>$\pm 0.109$ | 0.147<br>$\pm 0.103$ | 0.149<br>$\pm 0.108$ | 0.234<br>$\pm 0.151$ | 0.145<br>$\pm 0.108$ | 0.113<br>$\pm 0.065$ | 0.142<br>$\pm 0.098$ | 0.080<br>$\pm 0.050$ | <b>0.009</b><br>$\pm$ <b>0.019</b> | 0.020<br>$\pm 0.019$               | 0.012<br>$\pm 0.023$ | 0.035<br>$\pm 0.046$ | 0.129<br>$\pm 0.109$ | 0.096<br>$\pm 0.054$ | 0.005<br>$\pm 0.019$               | 0.117<br>$\pm 0.062$ | 0.012<br>$\pm 0.017$               |
|           | Acc.1    | 0.168<br>$\pm 0.109$ | 0.147<br>$\pm 0.103$ | 0.149<br>$\pm 0.108$ | 0.249<br>$\pm 0.159$ | 0.145<br>$\pm 0.108$ | 0.129<br>$\pm 0.072$ | 0.147<br>$\pm 0.101$ | 0.065<br>$\pm 0.050$ | <b>0.008</b><br>$\pm$ <b>0.023</b> | 0.024<br>$\pm 0.029$               | 0.015<br>$\pm 0.031$ | 0.033<br>$\pm 0.053$ | 0.140<br>$\pm 0.120$ | 0.095<br>$\pm 0.064$ | 0.000<br>$\pm 0.025$               | 0.133<br>$\pm 0.071$ | 0.015<br>$\pm 0.020$               |
|           | Acc.2    | 0.230<br>$\pm 0.135$ | 0.215<br>$\pm 0.142$ | 0.222<br>$\pm 0.138$ | 0.362<br>$\pm 0.205$ | 0.207<br>$\pm 0.150$ | 0.173<br>$\pm 0.078$ | 0.231<br>$\pm 0.154$ | 0.072<br>$\pm 0.051$ | <b>0.013</b><br>$\pm$ <b>0.030</b> | 0.030<br>$\pm 0.042$               | 0.030<br>$\pm 0.043$ | 0.040<br>$\pm 0.055$ | 0.199<br>$\pm 0.147$ | 0.096<br>$\pm 0.058$ | -0.002<br>$\pm 0.026$              | 0.174<br>$\pm 0.076$ | 0.025<br>$\pm 0.036$               |
| Subject3  | $\kappa$ | 0.093<br>$\pm 0.076$ | 0.120<br>$\pm 0.101$ | 0.072<br>$\pm 0.079$ | 0.170<br>$\pm 0.120$ | 0.104<br>$\pm 0.075$ | 0.068<br>$\pm 0.059$ | 0.102<br>$\pm 0.079$ | 0.039<br>$\pm 0.048$ | 0.010<br>$\pm 0.017$               | <b>0.008</b><br>$\pm$ <b>0.025</b> | 0.017<br>$\pm 0.023$ | 0.016<br>$\pm 0.027$ | 0.113<br>$\pm 0.086$ | 0.053<br>$\pm 0.040$ | -0.002<br>$\pm 0.019$              | 0.060<br>$\pm 0.052$ | 0.010<br>$\pm 0.019$               |

Continued on next page

| Subject   | Metric   | DeepConvnet     | EEGNet          | Conformer       | CTNet           | SSVEPDNN        | BIOT (f)        | BIOT (l)        | BENDR (f)                      | BENDR (l)                      | CBraMod (f)                    | CBraMod (l)     | EEGPT (f)                      | EEGPT (l)       | LaBraM (f)      | LaBraM (l)                     | STEEGformer-s (f) | STEEGformer-s (l)              |
|-----------|----------|-----------------|-----------------|-----------------|-----------------|-----------------|-----------------|-----------------|--------------------------------|--------------------------------|--------------------------------|-----------------|--------------------------------|-----------------|-----------------|--------------------------------|-------------------|--------------------------------|
| Subject30 | AUC      | 0.117<br>±0.067 | 0.120<br>±0.058 | 0.095<br>±0.060 | 0.140<br>±0.056 | 0.145<br>±0.066 | 0.051<br>±0.025 | 0.122<br>±0.047 | 0.022<br>±0.024                | 0.037<br>±0.040                | 0.028<br>±0.019                | 0.090<br>±0.029 | <b>0.016</b><br>± <b>0.017</b> | 0.104<br>±0.032 | 0.022<br>±0.022 | 0.013<br>± 0.030               | 0.035<br>±0.025   | 0.068<br>±0.031                |
|           |          | 0.091<br>±0.074 | 0.117<br>±0.098 | 0.070<br>±0.077 | 0.166<br>±0.117 | 0.102<br>±0.073 | 0.066<br>±0.058 | 0.099<br>±0.077 | 0.038<br>±0.047                | 0.009<br>±0.017                | <b>0.008</b><br>± <b>0.024</b> | 0.017<br>±0.022 | 0.016<br>±0.027                | 0.111<br>±0.084 | 0.052<br>±0.039 | -0.002<br>± 0.018              | 0.059<br>±0.050   | 0.010<br>±0.019                |
|           | Acc.1    | 0.091<br>±0.074 | 0.117<br>±0.098 | 0.070<br>±0.077 | 0.171<br>±0.127 | 0.102<br>±0.073 | 0.093<br>±0.058 | 0.103<br>±0.083 | 0.046<br>±0.053                | 0.012<br>±0.021                | 0.018<br>±0.027                | 0.033<br>±0.027 | 0.026<br>±0.028                | 0.131<br>±0.098 | 0.080<br>±0.050 | -0.008<br>± 0.027              | 0.081<br>±0.062   | <b>0.009</b><br>± <b>0.020</b> |
|           |          | 0.136<br>±0.097 | 0.159<br>±0.122 | 0.101<br>±0.087 | 0.240<br>±0.158 | 0.158<br>±0.103 | 0.122<br>±0.069 | 0.173<br>±0.124 | 0.053<br>±0.055                | <b>0.017</b><br>± <b>0.028</b> | 0.041<br>±0.027                | 0.060<br>±0.039 | 0.040<br>±0.043                | 0.182<br>±0.115 | 0.091<br>±0.056 | -0.004<br>± 0.035              | 0.111<br>±0.077   | 0.023<br>±0.025                |
|           | $\kappa$ | 0.111<br>±0.074 | 0.124<br>±0.092 | 0.134<br>±0.104 | 0.189<br>±0.125 | 0.106<br>±0.089 | 0.091<br>±0.068 | 0.106<br>±0.080 | 0.044<br>±0.047                | 0.011<br>±0.020                | 0.002<br>± 0.019               | 0.020<br>±0.022 | 0.029<br>±0.033                | 0.133<br>±0.102 | 0.100<br>±0.066 | <b>0.005</b><br>± <b>0.017</b> | 0.119<br>±0.071   | 0.013<br>±0.023                |
|           |          | 0.114<br>±0.039 | 0.115<br>±0.033 | 0.148<br>±0.054 | 0.139<br>±0.053 | 0.148<br>±0.075 | 0.054<br>±0.026 | 0.124<br>±0.046 | <b>0.027</b><br>± <b>0.028</b> | 0.038<br>±0.035                | 0.009<br>± 0.022               | 0.096<br>±0.044 | 0.031<br>±0.021                | 0.145<br>±0.056 | 0.054<br>±0.020 | 0.036<br>±0.027                | 0.058<br>±0.030   | 0.063<br>±0.032                |
|           | BAcc     | 0.108<br>±0.072 | 0.121<br>±0.090 | 0.131<br>±0.102 | 0.184<br>±0.122 | 0.103<br>±0.087 | 0.089<br>±0.066 | 0.104<br>±0.078 | 0.043<br>±0.045                | 0.010<br>±0.020                | 0.002<br>± 0.019               | 0.020<br>±0.021 | 0.028<br>±0.032                | 0.130<br>±0.099 | 0.098<br>±0.064 | <b>0.005</b><br>± <b>0.017</b> | 0.116<br>±0.070   | 0.013<br>±0.023                |
|           |          | 0.108<br>±0.072 | 0.121<br>±0.090 | 0.131<br>±0.102 | 0.184<br>±0.122 | 0.103<br>±0.087 | 0.099<br>±0.069 | 0.114<br>±0.086 | 0.042<br>±0.050                | 0.009<br>±0.026                | <b>0.006</b><br>± <b>0.028</b> | 0.034<br>±0.032 | 0.032<br>±0.044                | 0.148<br>±0.115 | 0.112<br>±0.075 | -0.010<br>± 0.024              | 0.139<br>±0.079   | 0.011<br>±0.026                |
|           | Acc.2    | 0.154<br>±0.083 | 0.175<br>±0.121 | 0.189<br>±0.128 | 0.265<br>±0.146 | 0.152<br>±0.115 | 0.136<br>±0.081 | 0.193<br>±0.127 | 0.056<br>±0.057                | <b>0.012</b><br>± <b>0.032</b> | 0.023<br>±0.029                | 0.051<br>±0.041 | 0.039<br>±0.041                | 0.207<br>±0.142 | 0.114<br>±0.064 | -0.008<br>± 0.032              | 0.172<br>±0.098   | 0.018<br>±0.031                |
| Subject31 | $\kappa$ | 0.150<br>±0.103 | 0.126<br>±0.092 | 0.126<br>±0.099 | 0.203<br>±0.128 | 0.092<br>±0.075 | 0.109<br>±0.080 | 0.124<br>±0.096 | 0.047<br>±0.049                | 0.009<br>±0.018                | <b>0.008</b><br>± <b>0.019</b> | 0.015<br>±0.014 | 0.030<br>±0.040                | 0.132<br>±0.095 | 0.088<br>±0.054 | 0.010<br>±0.015                | 0.092<br>±0.066   | 0.007<br>± 0.018               |
|           |          | 0.117<br>±0.046 | 0.126<br>±0.044 | 0.156<br>±0.053 | 0.159<br>±0.057 | 0.126<br>±0.060 | 0.047<br>±0.034 | 0.121<br>±0.047 | 0.032<br>±0.019                | 0.045<br>±0.037                | 0.015<br>± 0.015               | 0.065<br>±0.034 | <b>0.025</b><br>± <b>0.021</b> | 0.127<br>±0.034 | 0.042<br>±0.023 | 0.027<br>±0.031                | 0.050<br>±0.029   | 0.043<br>±0.031                |
|           | BAcc     | 0.147<br>±0.100 | 0.123<br>±0.090 | 0.123<br>±0.097 | 0.198<br>±0.125 | 0.090<br>±0.073 | 0.106<br>±0.078 | 0.121<br>±0.094 | 0.046<br>±0.048                | 0.009<br>±0.018                | <b>0.008</b><br>± <b>0.018</b> | 0.015<br>±0.014 | 0.029<br>±0.039                | 0.129<br>±0.093 | 0.086<br>±0.053 | 0.010<br>±0.015                | 0.089<br>±0.064   | 0.007<br>± 0.017               |
|           |          | 0.147<br>±0.100 | 0.123<br>±0.090 | 0.135<br>±0.097 | 0.215<br>±0.133 | 0.090<br>±0.073 | 0.107<br>±0.074 | 0.123<br>±0.095 | 0.048<br>±0.053                | <b>0.012</b><br>± <b>0.021</b> | 0.014<br>±0.024                | 0.025<br>±0.020 | 0.030<br>±0.043                | 0.135<br>±0.098 | 0.091<br>±0.061 | 0.017<br>±0.018                | 0.082<br>±0.063   | -0.001<br>± 0.026              |
|           | Acc.2    | 0.198<br>±0.115 | 0.185<br>±0.121 | 0.195<br>±0.129 | 0.303<br>±0.170 | 0.135<br>±0.089 | 0.131<br>±0.082 | 0.196<br>±0.132 | 0.055<br>±0.056                | <b>0.014</b><br>± <b>0.031</b> | 0.023<br>±0.031                | 0.048<br>±0.031 | 0.036<br>±0.045                | 0.178<br>±0.111 | 0.100<br>±0.053 | 0.030<br>±0.025                | 0.107<br>±0.080   | 0.006<br>± 0.035               |
| Subject32 | AUC      | 0.071<br>±0.040 | 0.098<br>±0.070 | 0.109<br>±0.070 | 0.194<br>±0.122 | 0.092<br>±0.071 | 0.060<br>±0.045 | 0.095<br>±0.065 | 0.023<br>±0.039                | 0.010<br>±0.018                | 0.017<br>±0.023                | 0.020<br>±0.025 | 0.009<br>±0.024                | 0.099<br>±0.055 | 0.065<br>±0.047 | 0.008<br>± 0.015               | 0.070<br>±0.055   | <b>0.009</b><br>± <b>0.020</b> |
|           |          | 0.111<br>±0.042 | 0.099<br>±0.039 | 0.135<br>±0.055 | 0.160<br>±0.057 | 0.127<br>±0.079 | 0.049<br>±0.025 | 0.105<br>±0.049 | 0.017<br>±0.028                | 0.039<br>±0.034                | 0.029<br>±0.022                | 0.105<br>±0.042 | <b>0.015</b><br>± <b>0.019</b> | 0.123<br>±0.035 | 0.032<br>±0.019 | 0.014<br>± 0.025               | 0.034<br>±0.024   | 0.033<br>±0.026                |

Continued on next page

| Subject   | Metric   | DeepConvnet | EEGNet      | Conformer   | CTNet       | SSVEPDNN    | BIOT <sup>(j)</sup> | BIOT <sup>(l)</sup> | BENDR <sup>(f)</sup> | BENDR <sup>(l)</sup> | CBraMod <sup>(f)</sup> | CBraMod <sup>(l)</sup> | EEGPT <sup>(f)</sup> | EEGPT <sup>(l)</sup> | LaBraM <sup>(f)</sup> | LaBraM <sup>(l)</sup> | STEEGformer-s <sup>(j)</sup> | STEEGformer-s <sup>(l)</sup> |
|-----------|----------|-------------|-------------|-------------|-------------|-------------|---------------------|---------------------|----------------------|----------------------|------------------------|------------------------|----------------------|----------------------|-----------------------|-----------------------|------------------------------|------------------------------|
| Subject33 | BAcc     | 0.069       | 0.096       | 0.106       | 0.189       | 0.090       | 0.058               | 0.092               | 0.023                | 0.010                | 0.017                  | 0.019                  | 0.009                | 0.097                | 0.064                 | 0.007                 | 0.068                        | <b>0.008</b>                 |
|           |          | $\pm 0.039$ | $\pm 0.068$ | $\pm 0.068$ | $\pm 0.119$ | $\pm 0.069$ | $\pm 0.044$         | $\pm 0.063$         | $\pm 0.038$          | $\pm 0.018$          | $\pm 0.022$            | $\pm 0.025$            | $\pm 0.023$          | $\pm 0.054$          | $\pm 0.046$           | $\pm 0.015$           | $\pm 0.054$                  | $\pm 0.019$                  |
|           | Acc.1    | 0.069       | 0.096       | 0.125       | 0.214       | 0.090       | 0.080               | 0.108               | 0.032                | 0.009                | 0.020                  | 0.021                  | 0.014                | 0.105                | 0.090                 | 0.009                 | 0.091                        | <b>0.009</b>                 |
|           |          | $\pm 0.039$ | $\pm 0.068$ | $\pm 0.074$ | $\pm 0.129$ | $\pm 0.069$ | $\pm 0.052$         | $\pm 0.074$         | $\pm 0.045$          | $\pm 0.020$          | $\pm 0.030$            | $\pm 0.034$            | $\pm 0.031$          | $\pm 0.062$          | $\pm 0.061$           | $\pm 0.021$           | $\pm 0.069$                  | $\pm 0.021$                  |
|           | Acc.2    | 0.109       | 0.138       | 0.177       | 0.317       | 0.133       | 0.103               | 0.176               | 0.040                | <b>0.017</b>         | 0.024                  | 0.037                  | 0.019                | 0.150                | 0.098                 | 0.014                 | 0.099                        | 0.020                        |
|           |          | $\pm 0.058$ | $\pm 0.089$ | $\pm 0.087$ | $\pm 0.174$ | $\pm 0.092$ | $\pm 0.067$         | $\pm 0.105$         | $\pm 0.066$          | $\pm 0.025$          | $\pm 0.032$            | $\pm 0.049$            | $\pm 0.035$          | $\pm 0.074$          | $\pm 0.064$           | $\pm 0.025$           | $\pm 0.082$                  | $\pm 0.027$                  |
|           | $\kappa$ | 0.079       | 0.128       | 0.135       | 0.195       | 0.098       | 0.101               | 0.117               | 0.075                | <b>0.008</b>         | 0.020                  | 0.042                  | 0.049                | 0.144                | 0.105                 | 0.004                 | 0.112                        | 0.011                        |
|           |          | $\pm 0.056$ | $\pm 0.094$ | $\pm 0.096$ | $\pm 0.129$ | $\pm 0.085$ | $\pm 0.079$         | $\pm 0.088$         | $\pm 0.060$          | $\pm 0.019$          | $\pm 0.024$            | $\pm 0.030$            | $\pm 0.036$          | $\pm 0.092$          | $\pm 0.071$           | $\pm 0.015$           | $\pm 0.070$                  | $\pm 0.017$                  |
|           | AUC      | 0.117       | 0.137       | 0.169       | 0.154       | 0.122       | 0.046               | 0.132               | 0.057                | 0.049                | <b>0.032</b>           | 0.181                  | 0.054                | 0.222                | 0.058                 | 0.019                 | 0.052                        | 0.056                        |
|           |          | $\pm 0.036$ | $\pm 0.050$ | $\pm 0.051$ | $\pm 0.047$ | $\pm 0.048$ | $\pm 0.036$         | $\pm 0.052$         | $\pm 0.034$          | $\pm 0.050$          | $\pm 0.022$            | $\pm 0.061$            | $\pm 0.026$          | $\pm 0.046$          | $\pm 0.024$           | $\pm 0.031$           | $\pm 0.036$                  | $\pm 0.029$                  |
|           | BAcc     | 0.077       | 0.125       | 0.131       | 0.190       | 0.096       | 0.098               | 0.114               | 0.073                | <b>0.008</b>         | 0.020                  | 0.041                  | 0.048                | 0.141                | 0.103                 | 0.004                 | 0.109                        | 0.011                        |
|           |          | $\pm 0.054$ | $\pm 0.092$ | $\pm 0.094$ | $\pm 0.126$ | $\pm 0.083$ | $\pm 0.077$         | $\pm 0.086$         | $\pm 0.058$          | $\pm 0.019$          | $\pm 0.023$            | $\pm 0.029$            | $\pm 0.035$          | $\pm 0.090$          | $\pm 0.069$           | $\pm 0.014$           | $\pm 0.068$                  | $\pm 0.016$                  |
|           | Acc.1    | 0.077       | 0.125       | 0.104       | 0.165       | 0.096       | 0.079               | 0.108               | 0.069                | <b>0.006</b>         | 0.012                  | 0.064                  | 0.048                | 0.154                | 0.094                 | 0.009                 | 0.076                        | -0.019                       |
|           |          | $\pm 0.054$ | $\pm 0.092$ | $\pm 0.081$ | $\pm 0.115$ | $\pm 0.083$ | $\pm 0.073$         | $\pm 0.089$         | $\pm 0.058$          | $\pm 0.022$          | $\pm 0.029$            | $\pm 0.049$            | $\pm 0.051$          | $\pm 0.096$          | $\pm 0.066$           | $\pm 0.018$           | $\pm 0.063$                  | $\pm 0.025$                  |
|           | Acc.2    | 0.115       | 0.189       | 0.140       | 0.226       | 0.132       | 0.109               | 0.168               | 0.089                | 0.019                | 0.029                  | 0.096                  | 0.061                | 0.213                | 0.100                 | <b>0.017</b>          | 0.090                        | -0.032                       |
|           |          | $\pm 0.071$ | $\pm 0.127$ | $\pm 0.095$ | $\pm 0.143$ | $\pm 0.100$ | $\pm 0.087$         | $\pm 0.134$         | $\pm 0.081$          | $\pm 0.033$          | $\pm 0.027$            | $\pm 0.071$            | $\pm 0.052$          | $\pm 0.118$          | $\pm 0.069$           | $\pm 0.026$           | $\pm 0.065$                  | $\pm 0.035$                  |
| Subject34 | $\kappa$ | 0.133       | 0.130       | 0.103       | 0.191       | 0.104       | 0.090               | 0.104               | 0.067                | <b>0.010</b>         | 0.015                  | 0.032                  | 0.030                | 0.112                | 0.092                 | 0.004                 | 0.089                        | 0.011                        |
|           |          | $\pm 0.091$ | $\pm 0.090$ | $\pm 0.085$ | $\pm 0.124$ | $\pm 0.077$ | $\pm 0.061$         | $\pm 0.074$         | $\pm 0.060$          | $\pm 0.017$          | $\pm 0.022$            | $\pm 0.023$            | $\pm 0.043$          | $\pm 0.071$          | $\pm 0.065$           | $\pm 0.016$           | $\pm 0.067$                  | $\pm 0.017$                  |
|           | AUC      | 0.115       | 0.128       | 0.123       | 0.151       | 0.133       | 0.058               | 0.106               | 0.057                | 0.043                | <b>0.030</b>           | 0.133                  | 0.037                | 0.127                | 0.039                 | 0.027                 | 0.048                        | 0.061                        |
|           |          | $\pm 0.068$ | $\pm 0.063$ | $\pm 0.060$ | $\pm 0.069$ | $\pm 0.059$ | $\pm 0.033$         | $\pm 0.052$         | $\pm 0.040$          | $\pm 0.040$          | $\pm 0.020$            | $\pm 0.056$            | $\pm 0.024$          | $\pm 0.048$          | $\pm 0.025$           | $\pm 0.037$           | $\pm 0.028$                  | $\pm 0.033$                  |
|           | BAcc     | 0.130       | 0.127       | 0.101       | 0.186       | 0.102       | 0.088               | 0.101               | 0.066                | <b>0.009</b>         | 0.015                  | 0.031                  | 0.030                | 0.109                | 0.090                 | 0.004                 | 0.086                        | 0.011                        |
|           |          | $\pm 0.088$ | $\pm 0.088$ | $\pm 0.083$ | $\pm 0.121$ | $\pm 0.075$ | $\pm 0.060$         | $\pm 0.072$         | $\pm 0.059$          | $\pm 0.017$          | $\pm 0.022$            | $\pm 0.022$            | $\pm 0.041$          | $\pm 0.069$          | $\pm 0.063$           | $\pm 0.016$           | $\pm 0.065$                  | $\pm 0.016$                  |
|           | Acc.1    | 0.130       | 0.127       | 0.101       | 0.177       | 0.102       | 0.065               | 0.101               | 0.074                | 0.009                | 0.011                  | 0.050                  | 0.030                | 0.099                | 0.069                 | -0.017                | 0.081                        | <b>0.002</b>                 |
|           |          | $\pm 0.088$ | $\pm 0.088$ | $\pm 0.083$ | $\pm 0.122$ | $\pm 0.075$ | $\pm 0.056$         | $\pm 0.073$         | $\pm 0.060$          | $\pm 0.022$          | $\pm 0.029$            | $\pm 0.031$            | $\pm 0.044$          | $\pm 0.065$          | $\pm 0.060$           | $\pm 0.024$           | $\pm 0.068$                  | $\pm 0.018$                  |
|           | Acc.2    | 0.185       | 0.177       | 0.147       | 0.232       | 0.151       | 0.106               | 0.170               | 0.099                | 0.015                | 0.019                  | 0.081                  | 0.034                | 0.140                | 0.071                 | -0.019                | 0.098                        | <b>0.002</b>                 |
|           |          | $\pm 0.108$ | $\pm 0.111$ | $\pm 0.101$ | $\pm 0.147$ | $\pm 0.096$ | $\pm 0.078$         | $\pm 0.106$         | $\pm 0.072$          | $\pm 0.036$          | $\pm 0.035$            | $\pm 0.048$            | $\pm 0.044$          | $\pm 0.098$          | $\pm 0.054$           | $\pm 0.038$           | $\pm 0.069$                  | $\pm 0.030$                  |
|           | $\kappa$ | 0.143       | 0.150       | 0.131       | 0.218       | 0.111       | 0.104               | 0.114               | 0.098                | 0.012                | 0.025                  | 0.033                  | 0.051                | 0.150                | 0.121                 | 0.003                 | 0.117                        | <b>0.010</b>                 |
|           |          | $\pm 0.094$ | $\pm 0.105$ | $\pm 0.093$ | $\pm 0.139$ | $\pm 0.090$ | $\pm 0.073$         | $\pm 0.085$         | $\pm 0.085$          | $\pm 0.017$          | $\pm 0.018$            | $\pm 0.021$            | $\pm 0.047$          | $\pm 0.104$          | $\pm 0.064$           | $\pm 0.016$           | $\pm 0.079$                  | $\pm 0.018$                  |
|           | AUC      | 0.142       | 0.165       | 0.166       | 0.173       | 0.134       | <b>0.042</b>        | 0.142               | 0.067                | 0.049                | 0.044                  | 0.156                  | 0.057                | 0.230                | 0.048                 | 0.021                 | 0.060                        | 0.066                        |
|           |          | $\pm 0.058$ | $\pm 0.058$ | $\pm 0.065$ | $\pm 0.062$ | $\pm 0.056$ | $\pm 0.026$         | $\pm 0.057$         | $\pm 0.044$          | $\pm 0.040$          | $\pm 0.021$            | $\pm 0.045$            | $\pm 0.025$          | $\pm 0.049$          | $\pm 0.025$           | $\pm 0.029$           | $\pm 0.031$                  | $\pm 0.039$                  |
|           | BAcc     | 0.140       | 0.146       | 0.128       | 0.212       | 0.108       | 0.101               | 0.112               | 0.096                | 0.011                | 0.025                  | 0.032                  | 0.049                | 0.146                | 0.118                 | 0.003                 | 0.114                        | <b>0.010</b>                 |
|           |          | $\pm 0.092$ | $\pm 0.102$ | $\pm 0.090$ | $\pm 0.135$ | $\pm 0.088$ | $\pm 0.071$         | $\pm 0.083$         | $\pm 0.083$          | $\pm 0.016$          | $\pm 0.018$            | $\pm 0.021$            | $\pm 0.046$          | $\pm 0.101$          | $\pm 0.063$           | $\pm 0.016$           | $\pm 0.077$                  | $\pm 0.018$                  |

Continued on next page

| Subject  | Metric   | DeepConvnet     | EEGNet          | Conformer       | CTNet           | SSVEPDNN        | BIOT (f)        | BIOT (l)        | BENDR (f)       | BENDR (l)                      | CBraMod (f)                    | CBraMod (l)     | EEGPT (f)                      | EEGPT (l)       | LaBraM (f)       | LaBraM (l)                     | STEEGformer-s (f) | STEEGformer-s (l) |
|----------|----------|-----------------|-----------------|-----------------|-----------------|-----------------|-----------------|-----------------|-----------------|--------------------------------|--------------------------------|-----------------|--------------------------------|-----------------|------------------|--------------------------------|-------------------|-------------------|
| Subject4 | Acc.1    | 0.140<br>±0.092 | 0.146<br>±0.102 | 0.134<br>±0.086 | 0.222<br>±0.135 | 0.108<br>±0.088 | 0.106<br>±0.074 | 0.122<br>±0.094 | 0.112<br>±0.083 | 0.014<br>±0.017                | 0.030<br>±0.031                | 0.055<br>±0.035 | 0.067<br>±0.054                | 0.167<br>±0.115 | 0.146<br>±0.077  | <b>0.005</b><br>± <b>0.023</b> | 0.143<br>±0.096   | 0.001<br>± 0.019  |
|          |          | 0.194<br>±0.122 | 0.216<br>±0.137 | 0.188<br>±0.112 | 0.311<br>±0.180 | 0.148<br>±0.109 | 0.128<br>±0.076 | 0.198<br>±0.130 | 0.155<br>±0.105 | 0.024<br>±0.030                | 0.056<br>±0.040                | 0.091<br>±0.055 | 0.088<br>±0.066                | 0.240<br>±0.140 | 0.173<br>±0.082  | <b>0.009</b><br>± <b>0.033</b> | 0.170<br>±0.093   | 0.009<br>± 0.032  |
|          | $\kappa$ | 0.201<br>±0.129 | 0.130<br>±0.096 | 0.137<br>±0.100 | 0.207<br>±0.132 | 0.133<br>±0.102 | 0.080<br>±0.058 | 0.099<br>±0.071 | 0.071<br>±0.069 | 0.008<br>±0.020                | 0.007<br>± 0.021               | 0.014<br>±0.023 | 0.021<br>±0.030                | 0.124<br>±0.102 | 0.089<br>±0.061  | <b>0.008</b><br>± <b>0.017</b> | 0.096<br>±0.060   | 0.013<br>±0.020   |
|          |          | 0.173<br>±0.066 | 0.129<br>±0.052 | 0.155<br>±0.055 | 0.177<br>±0.061 | 0.182<br>±0.080 | 0.050<br>±0.028 | 0.114<br>±0.041 | 0.056<br>±0.037 | 0.041<br>±0.046                | 0.014<br>± 0.020               | 0.092<br>±0.045 | <b>0.016</b><br>± <b>0.017</b> | 0.114<br>±0.043 | 0.044<br>±0.022  | 0.024<br>±0.027                | 0.060<br>±0.034   | 0.055<br>±0.033   |
|          | BAcc     | 0.196<br>±0.126 | 0.127<br>±0.094 | 0.134<br>±0.097 | 0.202<br>±0.129 | 0.130<br>±0.100 | 0.078<br>±0.056 | 0.096<br>±0.070 | 0.069<br>±0.067 | 0.008<br>±0.020                | 0.007<br>± 0.021               | 0.013<br>±0.023 | 0.021<br>±0.029                | 0.121<br>±0.100 | 0.086<br>±0.059  | <b>0.007</b><br>± <b>0.017</b> | 0.094<br>±0.058   | 0.013<br>±0.020   |
|          |          | 0.196<br>±0.126 | 0.122<br>±0.090 | 0.147<br>±0.105 | 0.201<br>±0.126 | 0.130<br>±0.100 | 0.089<br>±0.059 | 0.092<br>±0.070 | 0.058<br>±0.064 | <b>0.006</b><br>± <b>0.024</b> | 0.003<br>± 0.026               | 0.014<br>±0.030 | 0.017<br>±0.033                | 0.109<br>±0.107 | 0.087<br>±0.056  | 0.011<br>±0.019                | 0.109<br>±0.060   | 0.013<br>±0.022   |
| Subject5 | Acc.1    | 0.276<br>±0.158 | 0.175<br>±0.111 | 0.212<br>±0.127 | 0.284<br>±0.170 | 0.186<br>±0.139 | 0.114<br>±0.080 | 0.153<br>±0.100 | 0.079<br>±0.070 | 0.014<br>± 0.034               | <b>0.014</b><br>± <b>0.036</b> | 0.028<br>±0.036 | 0.018<br>±0.038                | 0.147<br>±0.126 | 0.110<br>±0.058  | 0.023<br>±0.027                | 0.129<br>±0.070   | 0.022<br>±0.028   |
|          |          | 0.121<br>±0.106 | 0.098<br>±0.083 | 0.075<br>±0.076 | 0.174<br>±0.132 | 0.092<br>±0.082 | 0.064<br>±0.052 | 0.098<br>±0.070 | 0.030<br>±0.051 | 0.004<br>± 0.013               | 0.008<br>±0.024                | 0.022<br>±0.022 | 0.023<br>±0.038                | 0.115<br>±0.085 | 0.055<br>±0.044  | <b>0.008</b><br>± <b>0.020</b> | 0.062<br>±0.054   | 0.010<br>±0.016   |
|          | AUC      | 0.117<br>±0.068 | 0.112<br>±0.058 | 0.099<br>±0.068 | 0.145<br>±0.060 | 0.124<br>±0.069 | 0.045<br>±0.023 | 0.123<br>±0.043 | 0.022<br>±0.030 | 0.028<br>±0.038                | <b>0.021</b><br>± <b>0.022</b> | 0.100<br>±0.035 | 0.024<br>±0.024                | 0.126<br>±0.039 | 0.018<br>± 0.015 | 0.023<br>±0.024                | 0.030<br>±0.024   | 0.064<br>±0.031   |
|          |          | 0.118<br>±0.103 | 0.095<br>±0.080 | 0.073<br>±0.074 | 0.170<br>±0.129 | 0.089<br>±0.080 | 0.062<br>±0.051 | 0.096<br>±0.068 | 0.029<br>±0.050 | 0.004<br>± 0.013               | <b>0.008</b><br>± <b>0.023</b> | 0.021<br>±0.022 | 0.022<br>±0.038                | 0.113<br>±0.083 | 0.054<br>±0.043  | 0.008<br>±0.019                | 0.060<br>±0.052   | 0.010<br>±0.015   |
|          | Acc.2    | 0.118<br>±0.103 | 0.095<br>±0.080 | 0.073<br>±0.074 | 0.170<br>±0.129 | 0.089<br>±0.080 | 0.084<br>±0.058 | 0.110<br>±0.067 | 0.033<br>±0.049 | <b>0.008</b><br>± <b>0.021</b> | 0.015<br>±0.028                | 0.025<br>±0.029 | 0.034<br>±0.040                | 0.128<br>±0.092 | 0.069<br>±0.049  | 0.007<br>± 0.027               | 0.092<br>±0.078   | 0.011<br>±0.017   |
|          |          | 0.172<br>±0.121 | 0.147<br>±0.109 | 0.107<br>±0.083 | 0.240<br>±0.155 | 0.130<br>±0.100 | 0.094<br>±0.054 | 0.179<br>±0.107 | 0.044<br>±0.050 | <b>0.014</b><br>± <b>0.025</b> | 0.027<br>±0.030                | 0.047<br>±0.040 | 0.040<br>±0.048                | 0.185<br>±0.114 | 0.084<br>±0.055  | 0.005<br>± 0.038               | 0.098<br>±0.083   | 0.019<br>±0.026   |
| Subject6 | $\kappa$ | 0.131<br>±0.091 | 0.107<br>±0.078 | 0.102<br>±0.075 | 0.177<br>±0.122 | 0.085<br>±0.067 | 0.067<br>±0.057 | 0.103<br>±0.079 | 0.022<br>±0.038 | 0.007<br>±0.018                | <b>0.006</b><br>± <b>0.018</b> | 0.012<br>±0.021 | 0.007<br>±0.023                | 0.100<br>±0.073 | 0.053<br>±0.053  | 0.005<br>± 0.018               | 0.100<br>±0.064   | 0.010<br>±0.017   |
|          |          | 0.102<br>±0.058 | 0.110<br>±0.062 | 0.111<br>±0.062 | 0.133<br>±0.061 | 0.097<br>±0.062 | 0.030<br>±0.024 | 0.108<br>±0.046 | 0.015<br>±0.022 | 0.032<br>±0.033                | 0.004<br>± 0.021               | 0.066<br>±0.036 | <b>0.005</b><br>± <b>0.017</b> | 0.085<br>±0.033 | 0.030<br>±0.025  | 0.019<br>±0.029                | 0.064<br>±0.031   | 0.033<br>±0.030   |
|          | BAcc     | 0.127<br>±0.089 | 0.105<br>±0.076 | 0.099<br>±0.073 | 0.173<br>±0.119 | 0.083<br>±0.065 | 0.065<br>±0.056 | 0.100<br>±0.077 | 0.021<br>±0.037 | 0.007<br>±0.018                | <b>0.005</b><br>± <b>0.017</b> | 0.012<br>±0.021 | 0.007<br>±0.022                | 0.097<br>±0.072 | 0.052<br>±0.052  | 0.005<br>± 0.017               | 0.098<br>±0.063   | 0.009<br>±0.016   |
|          |          | 0.127<br>±0.089 | 0.105<br>±0.076 | 0.099<br>±0.073 | 0.173<br>±0.119 | 0.083<br>±0.065 | 0.053<br>±0.051 | 0.103<br>±0.083 | 0.020<br>±0.046 | <b>0.002</b><br>± <b>0.023</b> | 0.005<br>±0.026                | 0.029<br>±0.032 | 0.002<br>±0.035                | 0.104<br>±0.076 | 0.052<br>±0.059  | 0.002<br>±0.022                | 0.083<br>±0.068   | 0.000<br>± 0.018  |
|          | Acc.1    | 0.127<br>±0.089 | 0.105<br>±0.076 | 0.099<br>±0.073 | 0.173<br>±0.119 | 0.083<br>±0.065 | 0.053<br>±0.051 | 0.103<br>±0.083 | 0.020<br>±0.046 | <b>0.002</b><br>± <b>0.023</b> | 0.005<br>±0.026                | 0.029<br>±0.032 | 0.002<br>±0.035                | 0.104<br>±0.076 | 0.052<br>±0.059  | 0.002<br>±0.022                | 0.083<br>±0.068   | 0.000<br>± 0.018  |

Continued on next page



| Subject  | Metric   | DeepConvnet     | EEGNet          | Conformer       | CTNet           | SSVEPDNN        | BIOT (f)        | BIOT (l)        | BENDR (f)       | BENDR (l)       | CBraMod (f)      | CBraMod (l)     | EEGPT (f)        | EEGPT (l)       | LaBraM (f)      | LaBraM (l)       | STEEGformer-s (f) | STEEGformer-s (l) |
|----------|----------|-----------------|-----------------|-----------------|-----------------|-----------------|-----------------|-----------------|-----------------|-----------------|------------------|-----------------|------------------|-----------------|-----------------|------------------|-------------------|-------------------|
| Subject7 | Acc.2    | 0.179<br>±0.102 | 0.151<br>±0.103 | 0.141<br>±0.094 | 0.244<br>±0.147 | 0.114<br>±0.082 | 0.056<br>±0.063 | 0.149<br>±0.106 | 0.031<br>±0.047 | 0.005<br>±0.036 | −0.000<br>±0.037 | 0.052<br>±0.038 | −0.000<br>±0.031 | 0.132<br>±0.079 | 0.058<br>±0.056 | 0.001<br>±0.034  | 0.106<br>±0.075   | 0.009<br>±0.025   |
|          | $\kappa$ | 0.087<br>±0.061 | 0.116<br>±0.087 | 0.120<br>±0.075 | 0.184<br>±0.119 | 0.100<br>±0.073 | 0.098<br>±0.069 | 0.098<br>±0.072 | 0.047<br>±0.058 | 0.009<br>±0.012 | 0.010<br>±0.020  | 0.024<br>±0.021 | 0.024<br>±0.032  | 0.119<br>±0.087 | 0.078<br>±0.056 | 0.001<br>±0.014  | 0.100<br>±0.071   | 0.007<br>±0.021   |
|          | AUC      | 0.118<br>±0.051 | 0.119<br>±0.043 | 0.135<br>±0.067 | 0.131<br>±0.042 | 0.126<br>±0.077 | 0.063<br>±0.031 | 0.113<br>±0.040 | 0.037<br>±0.030 | 0.040<br>±0.042 | 0.012<br>±0.019  | 0.082<br>±0.045 | −0.002<br>±0.025 | 0.103<br>±0.045 | 0.030<br>±0.020 | 0.012<br>±0.028  | 0.056<br>±0.029   | 0.035<br>±0.029   |
|          | BAcc     | 0.084<br>±0.059 | 0.114<br>±0.085 | 0.117<br>±0.073 | 0.180<br>±0.116 | 0.098<br>±0.071 | 0.096<br>±0.068 | 0.095<br>±0.070 | 0.046<br>±0.057 | 0.009<br>±0.011 | 0.010<br>±0.020  | 0.023<br>±0.020 | 0.024<br>±0.031  | 0.116<br>±0.085 | 0.076<br>±0.055 | 0.001<br>±0.014  | 0.097<br>±0.069   | 0.007<br>±0.021   |
|          | Acc.1    | 0.084<br>±0.059 | 0.111<br>±0.081 | 0.117<br>±0.073 | 0.185<br>±0.122 | 0.098<br>±0.071 | 0.123<br>±0.080 | 0.109<br>±0.071 | 0.042<br>±0.056 | 0.008<br>±0.015 | 0.010<br>±0.026  | 0.026<br>±0.025 | 0.028<br>±0.032  | 0.143<br>±0.100 | 0.075<br>±0.064 | −0.002<br>±0.017 | 0.105<br>±0.079   | 0.008<br>±0.025   |
|          | Acc.2    | 0.125<br>±0.074 | 0.156<br>±0.101 | 0.164<br>±0.093 | 0.266<br>±0.150 | 0.146<br>±0.099 | 0.165<br>±0.083 | 0.195<br>±0.125 | 0.058<br>±0.067 | 0.005<br>±0.031 | 0.016<br>±0.036  | 0.035<br>±0.038 | 0.030<br>±0.042  | 0.204<br>±0.123 | 0.099<br>±0.062 | −0.002<br>±0.027 | 0.132<br>±0.087   | 0.022<br>±0.037   |
|          | $\kappa$ | 0.138<br>±0.097 | 0.118<br>±0.092 | 0.099<br>±0.066 | 0.186<br>±0.116 | 0.073<br>±0.062 | 0.081<br>±0.052 | 0.100<br>±0.068 | 0.039<br>±0.043 | 0.009<br>±0.017 | 0.011<br>±0.020  | 0.026<br>±0.016 | 0.025<br>±0.038  | 0.109<br>±0.066 | 0.090<br>±0.051 | 0.009<br>±0.019  | 0.083<br>±0.053   | 0.011<br>±0.019   |
|          | AUC      | 0.116<br>±0.073 | 0.123<br>±0.055 | 0.109<br>±0.071 | 0.149<br>±0.062 | 0.092<br>±0.059 | 0.048<br>±0.030 | 0.114<br>±0.041 | 0.034<br>±0.034 | 0.042<br>±0.045 | 0.027<br>±0.020  | 0.136<br>±0.047 | 0.035<br>±0.015  | 0.110<br>±0.034 | 0.050<br>±0.014 | 0.027<br>±0.031  | 0.044<br>±0.028   | 0.064<br>±0.038   |
|          | BAcc     | 0.135<br>±0.095 | 0.115<br>±0.090 | 0.097<br>±0.064 | 0.182<br>±0.113 | 0.071<br>±0.061 | 0.079<br>±0.051 | 0.098<br>±0.067 | 0.038<br>±0.042 | 0.009<br>±0.017 | 0.011<br>±0.020  | 0.025<br>±0.016 | 0.024<br>±0.037  | 0.107<br>±0.064 | 0.087<br>±0.050 | 0.008<br>±0.018  | 0.081<br>±0.052   | 0.011<br>±0.018   |
|          | Acc.1    | 0.135<br>±0.095 | 0.115<br>±0.090 | 0.097<br>±0.064 | 0.199<br>±0.123 | 0.071<br>±0.061 | 0.097<br>±0.051 | 0.107<br>±0.079 | 0.047<br>±0.049 | 0.009<br>±0.022 | 0.007<br>±0.027  | 0.029<br>±0.025 | 0.027<br>±0.037  | 0.118<br>±0.069 | 0.095<br>±0.053 | 0.004<br>±0.017  | 0.097<br>±0.057   | 0.003<br>±0.025   |
|          | Acc.2    | 0.183<br>±0.117 | 0.174<br>±0.111 | 0.129<br>±0.079 | 0.280<br>±0.164 | 0.109<br>±0.080 | 0.112<br>±0.056 | 0.168<br>±0.111 | 0.059<br>±0.062 | 0.012<br>±0.034 | 0.018<br>±0.041  | 0.043<br>±0.035 | 0.035<br>±0.039  | 0.159<br>±0.087 | 0.102<br>±0.045 | 0.008<br>±0.026  | 0.118<br>±0.072   | 0.007<br>±0.032   |
| Subject9 | $\kappa$ | 0.154<br>±0.117 | 0.137<br>±0.098 | 0.109<br>±0.090 | 0.195<br>±0.138 | 0.078<br>±0.065 | 0.080<br>±0.057 | 0.106<br>±0.079 | 0.037<br>±0.049 | 0.009<br>±0.018 | 0.014<br>±0.022  | 0.025<br>±0.022 | 0.035<br>±0.037  | 0.140<br>±0.100 | 0.086<br>±0.051 | 0.012<br>±0.018  | 0.091<br>±0.071   | 0.010<br>±0.018   |
|          | AUC      | 0.124<br>±0.050 | 0.135<br>±0.047 | 0.129<br>±0.053 | 0.139<br>±0.049 | 0.107<br>±0.047 | 0.044<br>±0.027 | 0.122<br>±0.045 | 0.028<br>±0.029 | 0.043<br>±0.031 | 0.035<br>±0.020  | 0.126<br>±0.037 | 0.035<br>±0.022  | 0.214<br>±0.046 | 0.052<br>±0.020 | 0.029<br>±0.030  | 0.043<br>±0.031   | 0.066<br>±0.030   |
|          | BAcc     | 0.150<br>±0.114 | 0.133<br>±0.096 | 0.107<br>±0.088 | 0.190<br>±0.135 | 0.076<br>±0.063 | 0.078<br>±0.055 | 0.104<br>±0.077 | 0.036<br>±0.047 | 0.008<br>±0.017 | 0.014<br>±0.021  | 0.024<br>±0.021 | 0.035<br>±0.036  | 0.137<br>±0.097 | 0.083<br>±0.049 | 0.011<br>±0.017  | 0.089<br>±0.069   | 0.010<br>±0.018   |
|          | Acc.1    | 0.150<br>±0.114 | 0.133<br>±0.096 | 0.107<br>±0.088 | 0.202<br>±0.137 | 0.076<br>±0.063 | 0.084<br>±0.061 | 0.108<br>±0.093 | 0.042<br>±0.050 | 0.009<br>±0.017 | 0.020<br>±0.027  | 0.040<br>±0.028 | 0.038<br>±0.041  | 0.141<br>±0.108 | 0.094<br>±0.057 | −0.000<br>±0.024 | 0.081<br>±0.073   | −0.007<br>±0.025  |
|          | Acc.2    | 0.212<br>±0.139 | 0.197<br>±0.122 | 0.157<br>±0.103 | 0.284<br>±0.176 | 0.112<br>±0.093 | 0.095<br>±0.069 | 0.174<br>±0.124 | 0.056<br>±0.056 | 0.015<br>±0.023 | 0.037<br>±0.036  | 0.076<br>±0.042 | 0.048<br>±0.053  | 0.218<br>±0.129 | 0.108<br>±0.059 | 0.002<br>±0.035  | 0.100<br>±0.078   | −0.005<br>±0.037  |

## F.3.2 ASYNCHRONOUS DECODING RESULTS

## Leave-One-Out Zero-Shot Evaluation

Table 69: Average Leave-One-Out Zero-Shot Performance Across All Subjects.

| Model (Training strategy) | $\kappa$     | AUC          | BAcc         | Acc.1        | Acc.2        |
|---------------------------|--------------|--------------|--------------|--------------|--------------|
|                           | 0.173        | 0.806        | 0.194        | 0.194        | 0.298        |
| <b>DeepConvnet</b>        | $\pm 0.123$  | $\pm 0.086$  | $\pm 0.120$  | $\pm 0.120$  | $\pm 0.156$  |
|                           | <b>0.224</b> | <b>0.829</b> | <b>0.243</b> | <b>0.243</b> | <b>0.368</b> |
| <b>EEGNet</b>             | $\pm 0.148$  | $\pm 0.105$  | $\pm 0.144$  | $\pm 0.144$  | $\pm 0.193$  |
|                           | 0.143        | 0.775        | 0.165        | 0.164        | 0.264        |
| <b>Conformer</b>          | $\pm 0.112$  | $\pm 0.100$  | $\pm 0.109$  | $\pm 0.109$  | $\pm 0.148$  |
|                           | 0.260        | 0.848        | 0.279        | 0.279        | 0.413        |
| <b>CTNet</b>              | $\pm 0.180$  | $\pm 0.114$  | $\pm 0.175$  | $\pm 0.175$  | $\pm 0.227$  |
|                           | 0.146        | 0.773        | 0.167        | 0.167        | 0.264        |
| <b>SSVEPDNN</b>           | $\pm 0.102$  | $\pm 0.092$  | $\pm 0.100$  | $\pm 0.100$  | $\pm 0.136$  |
|                           | 0.179        | 0.712        | 0.200        | 0.200        | 0.314        |
| <b>BIOT (f)</b>           | $\pm 0.151$  | $\pm 0.116$  | $\pm 0.147$  | $\pm 0.147$  | $\pm 0.202$  |
|                           | 0.176        | 0.790        | 0.197        | 0.196        | 0.335        |
| <b>BIOT (l)</b>           | $\pm 0.133$  | $\pm 0.139$  | $\pm 0.130$  | $\pm 0.129$  | $\pm 0.206$  |
|                           | 0.194        | 0.760        | 0.214        | 0.214        | 0.319        |
| <b>BENDR (f)</b>          | $\pm 0.151$  | $\pm 0.117$  | $\pm 0.147$  | $\pm 0.147$  | $\pm 0.187$  |
|                           | 0.030        | 0.645        | 0.054        | 0.054        | 0.104        |
| <b>BENDR (l)</b>          | $\pm 0.012$  | $\pm 0.043$  | $\pm 0.012$  | $\pm 0.012$  | $\pm 0.021$  |
|                           | 0.038        | 0.603        | 0.062        | 0.062        | 0.115        |
| <b>CBraMod (f)</b>        | $\pm 0.017$  | $\pm 0.031$  | $\pm 0.016$  | $\pm 0.016$  | $\pm 0.024$  |
|                           | 0.027        | 0.628        | 0.052        | 0.053        | 0.097        |
| <b>CBraMod (l)</b>        | $\pm 0.014$  | $\pm 0.059$  | $\pm 0.014$  | $\pm 0.015$  | $\pm 0.028$  |
|                           | 0.076        | 0.657        | 0.099        | 0.099        | 0.160        |
| <b>EEGPT (f)</b>          | $\pm 0.069$  | $\pm 0.079$  | $\pm 0.067$  | $\pm 0.068$  | $\pm 0.091$  |
|                           | 0.157        | 0.801        | 0.178        | 0.178        | 0.285        |
| <b>EEGPT (l)</b>          | $\pm 0.108$  | $\pm 0.090$  | $\pm 0.105$  | $\pm 0.105$  | $\pm 0.144$  |
|                           | 0.198        | 0.745        | 0.218        | 0.218        | 0.322        |
| <b>LaBraM (f)</b>         | $\pm 0.149$  | $\pm 0.106$  | $\pm 0.145$  | $\pm 0.145$  | $\pm 0.178$  |
|                           | 0.007        | 0.536        | 0.031        | 0.031        | 0.060        |
| <b>LaBraM (l)</b>         | $\pm 0.005$  | $\pm 0.020$  | $\pm 0.005$  | $\pm 0.005$  | $\pm 0.008$  |
|                           | 0.167        | 0.708        | 0.188        | 0.188        | 0.287        |
| <b>STEEGformer-s (f)</b>  | $\pm 0.118$  | $\pm 0.098$  | $\pm 0.115$  | $\pm 0.114$  | $\pm 0.151$  |
|                           | 0.011        | 0.600        | 0.036        | 0.036        | 0.070        |
| <b>STEEGformer-s (l)</b>  | $\pm 0.010$  | $\pm 0.039$  | $\pm 0.010$  | $\pm 0.010$  | $\pm 0.015$  |

Table 70: Per-Subject Leave-One-Out Zero-Shot Performance.

| Subject   | Metric   | DeepConvnet                 | EEGNet                      | Conformer            | CTNet                | SSVEPDNN             | BIOT (f)             | BIOT (l)                    | BENDR (f)            | BENDR (l)            | CBraMod (f)          | CBraMod (l)          | EEGPT (f)            | EEGPT (l)                   | LaBraM (f)           | LaBraM (l)           | STEEGformer-s (f)           | STEEGformer-s (l)    |
|-----------|----------|-----------------------------|-----------------------------|----------------------|----------------------|----------------------|----------------------|-----------------------------|----------------------|----------------------|----------------------|----------------------|----------------------|-----------------------------|----------------------|----------------------|-----------------------------|----------------------|
| Subject1  | $\kappa$ | 0.098<br>$\pm 0.061$        | 0.117<br>$\pm 0.022$        | 0.072<br>$\pm 0.030$ | 0.169<br>$\pm 0.012$ | 0.067<br>$\pm 0.019$ | 0.102<br>$\pm 0.043$ | 0.132<br>$\pm 0.043$        | 0.090<br>$\pm 0.014$ | 0.012<br>$\pm 0.010$ | 0.005<br>$\pm 0.019$ | 0.024<br>$\pm 0.020$ | 0.025<br>$\pm 0.006$ | 0.058<br>$\pm 0.031$        | 0.143<br>$\pm 0.048$ | 0.004<br>$\pm 0.007$ | <b>0.146</b><br>$\pm 0.032$ | 0.008<br>$\pm 0.022$ |
|           | AUC      | 0.760<br>$\pm 0.052$        | 0.754<br>$\pm 0.027$        | 0.711<br>$\pm 0.034$ | 0.823<br>$\pm 0.021$ | 0.689<br>$\pm 0.022$ | 0.660<br>$\pm 0.034$ | <b>0.789</b><br>$\pm 0.041$ | 0.671<br>$\pm 0.016$ | 0.566<br>$\pm 0.028$ | 0.559<br>$\pm 0.039$ | 0.587<br>$\pm 0.048$ | 0.586<br>$\pm 0.026$ | 0.668<br>$\pm 0.025$        | 0.707<br>$\pm 0.031$ | 0.525<br>$\pm 0.022$ | 0.715<br>$\pm 0.025$        | 0.559<br>$\pm 0.025$ |
|           | BAcc     | 0.120<br>$\pm 0.059$        | 0.140<br>$\pm 0.021$        | 0.095<br>$\pm 0.029$ | 0.190<br>$\pm 0.012$ | 0.090<br>$\pm 0.019$ | 0.124<br>$\pm 0.042$ | 0.154<br>$\pm 0.042$        | 0.113<br>$\pm 0.014$ | 0.037<br>$\pm 0.010$ | 0.030<br>$\pm 0.018$ | 0.048<br>$\pm 0.019$ | 0.050<br>$\pm 0.006$ | 0.081<br>$\pm 0.030$        | 0.165<br>$\pm 0.047$ | 0.029<br>$\pm 0.007$ | <b>0.167</b><br>$\pm 0.031$ | 0.033<br>$\pm 0.021$ |
|           | Acc.1    | 0.120<br>$\pm 0.059$        | 0.140<br>$\pm 0.021$        | 0.095<br>$\pm 0.029$ | 0.190<br>$\pm 0.012$ | 0.090<br>$\pm 0.019$ | 0.122<br>$\pm 0.041$ | 0.154<br>$\pm 0.040$        | 0.112<br>$\pm 0.014$ | 0.037<br>$\pm 0.011$ | 0.030<br>$\pm 0.019$ | 0.049<br>$\pm 0.020$ | 0.049<br>$\pm 0.006$ | 0.081<br>$\pm 0.030$        | 0.166<br>$\pm 0.045$ | 0.029<br>$\pm 0.006$ | <b>0.168</b><br>$\pm 0.030$ | 0.034<br>$\pm 0.020$ |
|           | Acc.2    | 0.217<br>$\pm 0.089$        | 0.240<br>$\pm 0.035$        | 0.168<br>$\pm 0.045$ | 0.300<br>$\pm 0.022$ | 0.163<br>$\pm 0.024$ | 0.206<br>$\pm 0.042$ | <b>0.282</b><br>$\pm 0.052$ | 0.186<br>$\pm 0.024$ | 0.072<br>$\pm 0.016$ | 0.076<br>$\pm 0.027$ | 0.085<br>$\pm 0.023$ | 0.084<br>$\pm 0.009$ | 0.140<br>$\pm 0.034$        | 0.259<br>$\pm 0.045$ | 0.053<br>$\pm 0.008$ | 0.269<br>$\pm 0.039$        | 0.061<br>$\pm 0.029$ |
|           |          |                             |                             |                      |                      |                      |                      |                             |                      |                      |                      |                      |                      |                             |                      |                      |                             |                      |
| Subject10 | $\kappa$ | <b>0.042</b><br>$\pm 0.022$ | 0.027<br>$\pm 0.030$        | 0.031<br>$\pm 0.040$ | 0.037<br>$\pm 0.022$ | 0.027<br>$\pm 0.013$ | 0.015<br>$\pm 0.012$ | 0.014<br>$\pm 0.011$        | 0.034<br>$\pm 0.019$ | 0.022<br>$\pm 0.012$ | 0.027<br>$\pm 0.019$ | 0.022<br>$\pm 0.010$ | 0.022<br>$\pm 0.014$ | 0.041<br>$\pm 0.023$        | 0.040<br>$\pm 0.020$ | 0.009<br>$\pm 0.010$ | 0.047<br>$\pm 0.015$        | 0.020<br>$\pm 0.009$ |
|           | AUC      | 0.682<br>$\pm 0.046$        | 0.644<br>$\pm 0.035$        | 0.639<br>$\pm 0.057$ | 0.643<br>$\pm 0.038$ | 0.617<br>$\pm 0.036$ | 0.570<br>$\pm 0.027$ | 0.568<br>$\pm 0.020$        | 0.587<br>$\pm 0.035$ | 0.619<br>$\pm 0.031$ | 0.543<br>$\pm 0.028$ | 0.639<br>$\pm 0.031$ | 0.559<br>$\pm 0.013$ | <b>0.666</b><br>$\pm 0.043$ | 0.576<br>$\pm 0.027$ | 0.539<br>$\pm 0.016$ | 0.599<br>$\pm 0.015$        | 0.629<br>$\pm 0.019$ |
|           | BAcc     | <b>0.066</b><br>$\pm 0.022$ | 0.051<br>$\pm 0.030$        | 0.055<br>$\pm 0.039$ | 0.061<br>$\pm 0.021$ | 0.051<br>$\pm 0.012$ | 0.040<br>$\pm 0.012$ | 0.038<br>$\pm 0.010$        | 0.059<br>$\pm 0.018$ | 0.046<br>$\pm 0.011$ | 0.051<br>$\pm 0.018$ | 0.046<br>$\pm 0.009$ | 0.046<br>$\pm 0.013$ | 0.065<br>$\pm 0.022$        | 0.064<br>$\pm 0.019$ | 0.034<br>$\pm 0.010$ | 0.070<br>$\pm 0.014$        | 0.045<br>$\pm 0.009$ |
|           | Acc.1    | <b>0.066</b><br>$\pm 0.022$ | 0.051<br>$\pm 0.030$        | 0.055<br>$\pm 0.039$ | 0.061<br>$\pm 0.021$ | 0.051<br>$\pm 0.012$ | 0.040<br>$\pm 0.012$ | 0.037<br>$\pm 0.010$        | 0.060<br>$\pm 0.020$ | 0.046<br>$\pm 0.011$ | 0.051<br>$\pm 0.018$ | 0.048<br>$\pm 0.009$ | 0.047<br>$\pm 0.013$ | 0.065<br>$\pm 0.022$        | 0.064<br>$\pm 0.019$ | 0.034<br>$\pm 0.008$ | 0.072<br>$\pm 0.014$        | 0.044<br>$\pm 0.008$ |
|           | Acc.2    | 0.124<br>$\pm 0.031$        | 0.100<br>$\pm 0.031$        | 0.108<br>$\pm 0.057$ | 0.110<br>$\pm 0.036$ | 0.096<br>$\pm 0.018$ | 0.085<br>$\pm 0.022$ | 0.074<br>$\pm 0.012$        | 0.110<br>$\pm 0.025$ | 0.090<br>$\pm 0.019$ | 0.090<br>$\pm 0.023$ | 0.092<br>$\pm 0.015$ | 0.077<br>$\pm 0.014$ | 0.113<br>$\pm 0.038$        | 0.117<br>$\pm 0.021$ | 0.061<br>$\pm 0.013$ | <b>0.122</b><br>$\pm 0.022$ | 0.082<br>$\pm 0.013$ |
|           |          |                             |                             |                      |                      |                      |                      |                             |                      |                      |                      |                      |                      |                             |                      |                      |                             |                      |
| Subject11 | $\kappa$ | 0.101<br>$\pm 0.024$        | <b>0.118</b><br>$\pm 0.047$ | 0.063<br>$\pm 0.026$ | 0.140<br>$\pm 0.052$ | 0.090<br>$\pm 0.031$ | 0.077<br>$\pm 0.027$ | 0.100<br>$\pm 0.021$        | 0.082<br>$\pm 0.017$ | 0.018<br>$\pm 0.012$ | 0.021<br>$\pm 0.016$ | 0.023<br>$\pm 0.019$ | 0.019<br>$\pm 0.014$ | 0.080<br>$\pm 0.039$        | 0.081<br>$\pm 0.031$ | 0.007<br>$\pm 0.004$ | 0.084<br>$\pm 0.022$        | 0.009<br>$\pm 0.016$ |
|           | AUC      | 0.761<br>$\pm 0.033$        | <b>0.778</b><br>$\pm 0.017$ | 0.698<br>$\pm 0.038$ | 0.794<br>$\pm 0.023$ | 0.723<br>$\pm 0.024$ | 0.621<br>$\pm 0.009$ | 0.726<br>$\pm 0.042$        | 0.671<br>$\pm 0.028$ | 0.582<br>$\pm 0.011$ | 0.551<br>$\pm 0.030$ | 0.596<br>$\pm 0.053$ | 0.581<br>$\pm 0.017$ | 0.729<br>$\pm 0.033$        | 0.665<br>$\pm 0.029$ | 0.531<br>$\pm 0.029$ | 0.638<br>$\pm 0.032$        | 0.540<br>$\pm 0.026$ |
|           | BAcc     | 0.124<br>$\pm 0.024$        | <b>0.140</b><br>$\pm 0.046$ | 0.087<br>$\pm 0.026$ | 0.162<br>$\pm 0.051$ | 0.113<br>$\pm 0.030$ | 0.100<br>$\pm 0.027$ | 0.122<br>$\pm 0.020$        | 0.105<br>$\pm 0.017$ | 0.043<br>$\pm 0.011$ | 0.045<br>$\pm 0.016$ | 0.047<br>$\pm 0.018$ | 0.043<br>$\pm 0.014$ | 0.103<br>$\pm 0.038$        | 0.104<br>$\pm 0.030$ | 0.031<br>$\pm 0.004$ | 0.107<br>$\pm 0.021$        | 0.034<br>$\pm 0.016$ |
|           | Acc.1    | 0.124<br>$\pm 0.024$        | <b>0.140</b><br>$\pm 0.046$ | 0.087<br>$\pm 0.026$ | 0.160<br>$\pm 0.050$ | 0.113<br>$\pm 0.030$ | 0.100<br>$\pm 0.028$ | 0.122<br>$\pm 0.019$        | 0.105<br>$\pm 0.016$ | 0.043<br>$\pm 0.012$ | 0.044<br>$\pm 0.015$ | 0.048<br>$\pm 0.019$ | 0.043<br>$\pm 0.013$ | 0.102<br>$\pm 0.038$        | 0.103<br>$\pm 0.031$ | 0.031<br>$\pm 0.004$ | 0.107<br>$\pm 0.020$        | 0.033<br>$\pm 0.015$ |
|           | Acc.2    | 0.227<br>$\pm 0.041$        | <b>0.245</b><br>$\pm 0.046$ | 0.158<br>$\pm 0.041$ | 0.257<br>$\pm 0.058$ | 0.193<br>$\pm 0.029$ | 0.162<br>$\pm 0.026$ | 0.215<br>$\pm 0.040$        | 0.172<br>$\pm 0.018$ | 0.078<br>$\pm 0.019$ | 0.091<br>$\pm 0.026$ | 0.092<br>$\pm 0.033$ | 0.082<br>$\pm 0.025$ | 0.179<br>$\pm 0.047$        | 0.173<br>$\pm 0.034$ | 0.052<br>$\pm 0.009$ | 0.172<br>$\pm 0.032$        | 0.053<br>$\pm 0.018$ |
|           |          |                             |                             |                      |                      |                      |                      |                             |                      |                      |                      |                      |                      |                             |                      |                      |                             |                      |

Continued on next page

| Subject   | Metric   | DeepConvnet                 | EEGNet                      | Conformer                   | CTNet                       | SSVEPDNN             | BIOT <sup>(i)</sup>  | BIOT <sup>(i)</sup>  | BENDR <sup>(i)</sup> | BENDR <sup>(i)</sup> | CBraMod <sup>(i)</sup> | CBraMod <sup>(i)</sup>      | EEGPT <sup>(i)</sup> | EEGPT <sup>(i)</sup> | LaBraM <sup>(i)</sup> | LaBraM <sup>(i)</sup> | STEEGformer-s <sup>(i)</sup> | STEEGformer-s <sup>(i)</sup> |
|-----------|----------|-----------------------------|-----------------------------|-----------------------------|-----------------------------|----------------------|----------------------|----------------------|----------------------|----------------------|------------------------|-----------------------------|----------------------|----------------------|-----------------------|-----------------------|------------------------------|------------------------------|
| Subject12 | $\kappa$ | 0.029<br>$\pm 0.026$        | 0.015<br>$\pm 0.010$        | <b>0.031</b><br>$\pm 0.035$ | 0.005<br>$\pm 0.013$        | 0.025<br>$\pm 0.021$ | 0.001<br>$\pm 0.007$ | 0.003<br>$\pm 0.007$ | 0.014<br>$\pm 0.015$ | 0.020<br>$\pm 0.012$ | 0.041<br>$\pm 0.013$   | 0.027<br>$\pm 0.021$        | 0.005<br>$\pm 0.010$ | 0.028<br>$\pm 0.029$ | 0.024<br>$\pm 0.035$  | 0.002<br>$\pm 0.008$  | 0.019<br>$\pm 0.025$         | -0.004<br>$\pm 0.009$        |
|           | AUC      | 0.665<br>$\pm 0.029$        | 0.643<br>$\pm 0.034$        | 0.617<br>$\pm 0.033$        | 0.654<br>$\pm 0.041$        | 0.629<br>$\pm 0.039$ | 0.525<br>$\pm 0.022$ | 0.509<br>$\pm 0.014$ | 0.562<br>$\pm 0.030$ | 0.629<br>$\pm 0.034$ | 0.610<br>$\pm 0.038$   | <b>0.662</b><br>$\pm 0.027$ | 0.555<br>$\pm 0.019$ | 0.655<br>$\pm 0.027$ | 0.586<br>$\pm 0.036$  | 0.503<br>$\pm 0.025$  | 0.551<br>$\pm 0.028$         | 0.517<br>$\pm 0.029$         |
|           | BAcc     | 0.053<br>$\pm 0.026$        | 0.040<br>$\pm 0.010$        | <b>0.055</b><br>$\pm 0.034$ | 0.030<br>$\pm 0.013$        | 0.050<br>$\pm 0.020$ | 0.026<br>$\pm 0.007$ | 0.028<br>$\pm 0.007$ | 0.039<br>$\pm 0.015$ | 0.045<br>$\pm 0.012$ | 0.065<br>$\pm 0.013$   | 0.051<br>$\pm 0.021$        | 0.030<br>$\pm 0.010$ | 0.053<br>$\pm 0.028$ | 0.049<br>$\pm 0.034$  | 0.027<br>$\pm 0.008$  | 0.043<br>$\pm 0.024$         | 0.021<br>$\pm 0.008$         |
|           | Acc.1    | 0.053<br>$\pm 0.025$        | 0.040<br>$\pm 0.010$        | <b>0.054</b><br>$\pm 0.033$ | 0.029<br>$\pm 0.013$        | 0.050<br>$\pm 0.020$ | 0.027<br>$\pm 0.008$ | 0.027<br>$\pm 0.007$ | 0.039<br>$\pm 0.015$ | 0.044<br>$\pm 0.012$ | 0.066<br>$\pm 0.013$   | 0.052<br>$\pm 0.023$        | 0.031<br>$\pm 0.009$ | 0.052<br>$\pm 0.028$ | 0.049<br>$\pm 0.035$  | 0.027<br>$\pm 0.008$  | 0.042<br>$\pm 0.023$         | 0.021<br>$\pm 0.008$         |
|           | Acc.2    | <b>0.104</b><br>$\pm 0.033$ | 0.092<br>$\pm 0.024$        | 0.100<br>$\pm 0.041$        | 0.078<br>$\pm 0.019$        | 0.094<br>$\pm 0.025$ | 0.056<br>$\pm 0.013$ | 0.051<br>$\pm 0.012$ | 0.075<br>$\pm 0.025$ | 0.086<br>$\pm 0.017$ | 0.124<br>$\pm 0.017$   | 0.098<br>$\pm 0.022$        | 0.067<br>$\pm 0.012$ | 0.101<br>$\pm 0.043$ | 0.102<br>$\pm 0.041$  | 0.050<br>$\pm 0.012$  | 0.088<br>$\pm 0.028$         | 0.051<br>$\pm 0.011$         |
| Subject13 | $\kappa$ | 0.224<br>$\pm 0.067$        | <b>0.322</b><br>$\pm 0.034$ | 0.169<br>$\pm 0.075$        | 0.409<br>$\pm 0.091$        | 0.205<br>$\pm 0.084$ | 0.158<br>$\pm 0.045$ | 0.135<br>$\pm 0.038$ | 0.257<br>$\pm 0.036$ | 0.049<br>$\pm 0.012$ | 0.061<br>$\pm 0.022$   | 0.004<br>$\pm 0.010$        | 0.091<br>$\pm 0.020$ | 0.247<br>$\pm 0.030$ | 0.196<br>$\pm 0.039$  | 0.000<br>$\pm 0.003$  | 0.200<br>$\pm 0.072$         | 0.004<br>$\pm 0.013$         |
|           | AUC      | 0.883<br>$\pm 0.056$        | <b>0.915</b><br>$\pm 0.013$ | 0.837<br>$\pm 0.064$        | 0.940<br>$\pm 0.012$        | 0.853<br>$\pm 0.042$ | 0.722<br>$\pm 0.036$ | 0.811<br>$\pm 0.035$ | 0.835<br>$\pm 0.011$ | 0.740<br>$\pm 0.015$ | 0.642<br>$\pm 0.039$   | 0.528<br>$\pm 0.052$        | 0.723<br>$\pm 0.022$ | 0.906<br>$\pm 0.014$ | 0.781<br>$\pm 0.015$  | 0.526<br>$\pm 0.010$  | 0.749<br>$\pm 0.048$         | 0.617<br>$\pm 0.039$         |
|           | BAcc     | 0.244<br>$\pm 0.065$        | <b>0.339</b><br>$\pm 0.033$ | 0.190<br>$\pm 0.073$        | 0.424<br>$\pm 0.088$        | 0.225<br>$\pm 0.082$ | 0.179<br>$\pm 0.044$ | 0.157<br>$\pm 0.038$ | 0.276<br>$\pm 0.035$ | 0.072<br>$\pm 0.012$ | 0.085<br>$\pm 0.021$   | 0.029<br>$\pm 0.009$        | 0.114<br>$\pm 0.019$ | 0.266<br>$\pm 0.029$ | 0.216<br>$\pm 0.038$  | 0.025<br>$\pm 0.003$  | 0.220<br>$\pm 0.070$         | 0.029<br>$\pm 0.013$         |
|           | Acc.1    | 0.244<br>$\pm 0.065$        | <b>0.339</b><br>$\pm 0.033$ | 0.190<br>$\pm 0.073$        | 0.424<br>$\pm 0.088$        | 0.225<br>$\pm 0.082$ | 0.179<br>$\pm 0.043$ | 0.156<br>$\pm 0.038$ | 0.278<br>$\pm 0.034$ | 0.074<br>$\pm 0.011$ | 0.090<br>$\pm 0.023$   | 0.029<br>$\pm 0.010$        | 0.115<br>$\pm 0.020$ | 0.267<br>$\pm 0.031$ | 0.218<br>$\pm 0.037$  | 0.025<br>$\pm 0.004$  | 0.224<br>$\pm 0.068$         | 0.029<br>$\pm 0.014$         |
|           | Acc.2    | 0.371<br>$\pm 0.084$        | <b>0.496</b><br>$\pm 0.051$ | 0.297<br>$\pm 0.081$        | 0.605<br>$\pm 0.073$        | 0.347<br>$\pm 0.080$ | 0.292<br>$\pm 0.054$ | 0.290<br>$\pm 0.039$ | 0.405<br>$\pm 0.037$ | 0.146<br>$\pm 0.019$ | 0.152<br>$\pm 0.022$   | 0.055<br>$\pm 0.005$        | 0.198<br>$\pm 0.034$ | 0.422<br>$\pm 0.036$ | 0.342<br>$\pm 0.035$  | 0.053<br>$\pm 0.006$  | 0.349<br>$\pm 0.103$         | 0.070<br>$\pm 0.017$         |
| Subject14 | $\kappa$ | 0.338<br>$\pm 0.128$        | 0.412<br>$\pm 0.039$        | 0.156<br>$\pm 0.029$        | <b>0.442</b><br>$\pm 0.073$ | 0.261<br>$\pm 0.057$ | 0.334<br>$\pm 0.034$ | 0.306<br>$\pm 0.036$ | 0.385<br>$\pm 0.018$ | 0.055<br>$\pm 0.024$ | 0.068<br>$\pm 0.050$   | 0.053<br>$\pm 0.014$        | 0.148<br>$\pm 0.030$ | 0.314<br>$\pm 0.012$ | 0.479<br>$\pm 0.052$  | 0.010<br>$\pm 0.009$  | 0.414<br>$\pm 0.034$         | 0.023<br>$\pm 0.010$         |
|           | AUC      | 0.936<br>$\pm 0.034$        | <b>0.940</b><br>$\pm 0.014$ | 0.870<br>$\pm 0.005$        | 0.961<br>$\pm 0.009$        | 0.880<br>$\pm 0.032$ | 0.842<br>$\pm 0.009$ | 0.931<br>$\pm 0.007$ | 0.913<br>$\pm 0.011$ | 0.710<br>$\pm 0.008$ | 0.687<br>$\pm 0.043$   | 0.742<br>$\pm 0.031$        | 0.758<br>$\pm 0.024$ | 0.920<br>$\pm 0.008$ | 0.932<br>$\pm 0.019$  | 0.562<br>$\pm 0.016$  | 0.866<br>$\pm 0.021$         | 0.666<br>$\pm 0.037$         |
|           | BAcc     | 0.355<br>$\pm 0.124$        | 0.427<br>$\pm 0.038$        | 0.177<br>$\pm 0.028$        | <b>0.456</b><br>$\pm 0.071$ | 0.280<br>$\pm 0.055$ | 0.350<br>$\pm 0.034$ | 0.323<br>$\pm 0.035$ | 0.400<br>$\pm 0.017$ | 0.079<br>$\pm 0.024$ | 0.091<br>$\pm 0.049$   | 0.076<br>$\pm 0.013$        | 0.170<br>$\pm 0.029$ | 0.331<br>$\pm 0.011$ | 0.492<br>$\pm 0.051$  | 0.035<br>$\pm 0.009$  | 0.429<br>$\pm 0.033$         | 0.048<br>$\pm 0.010$         |
|           | Acc.1    | 0.355<br>$\pm 0.124$        | 0.427<br>$\pm 0.038$        | 0.177<br>$\pm 0.028$        | <b>0.452</b><br>$\pm 0.072$ | 0.280<br>$\pm 0.056$ | 0.349<br>$\pm 0.031$ | 0.321<br>$\pm 0.033$ | 0.400<br>$\pm 0.018$ | 0.080<br>$\pm 0.024$ | 0.090<br>$\pm 0.049$   | 0.080<br>$\pm 0.014$        | 0.171<br>$\pm 0.030$ | 0.332<br>$\pm 0.010$ | 0.492<br>$\pm 0.049$  | 0.035<br>$\pm 0.009$  | 0.429<br>$\pm 0.032$         | 0.047<br>$\pm 0.009$         |
|           | Acc.2    | 0.516<br>$\pm 0.150$        | 0.615<br>$\pm 0.041$        | 0.321<br>$\pm 0.028$        | <b>0.617</b><br>$\pm 0.080$ | 0.404<br>$\pm 0.066$ | 0.508<br>$\pm 0.018$ | 0.526<br>$\pm 0.026$ | 0.555<br>$\pm 0.020$ | 0.149<br>$\pm 0.028$ | 0.162<br>$\pm 0.061$   | 0.152<br>$\pm 0.027$        | 0.263<br>$\pm 0.030$ | 0.492<br>$\pm 0.027$ | 0.650<br>$\pm 0.047$  | 0.068<br>$\pm 0.008$  | 0.575<br>$\pm 0.025$         | 0.081<br>$\pm 0.020$         |
| Subject15 | $\kappa$ | 0.222<br>$\pm 0.039$        | <b>0.248</b><br>$\pm 0.096$ | 0.128<br>$\pm 0.053$        | 0.288<br>$\pm 0.081$        | 0.213<br>$\pm 0.082$ | 0.211<br>$\pm 0.078$ | 0.191<br>$\pm 0.039$ | 0.214<br>$\pm 0.080$ | 0.028<br>$\pm 0.012$ | 0.018<br>$\pm 0.016$   | 0.012<br>$\pm 0.014$        | 0.076<br>$\pm 0.015$ | 0.162<br>$\pm 0.059$ | 0.135<br>$\pm 0.060$  | 0.002<br>$\pm 0.006$  | 0.186<br>$\pm 0.066$         | -0.007<br>$\pm 0.011$        |

Continued on next page

| Subject   | Metric   | DeepConvnet     | EEGNet                         | Conformer       | CTNet                          | SSVEPDNN        | BIOT <sup>(f)</sup>            | BIOT <sup>(l)</sup>            | BENDR <sup>(f)</sup> | BENDR <sup>(l)</sup> | CBraMod <sup>(f)</sup> | CBraMod <sup>(l)</sup> | EEGPT <sup>(f)</sup> | EEGPT <sup>(l)</sup> | LaBraM <sup>(f)</sup> | LaBraM <sup>(l)</sup> | STEEGformer-s <sup>(f)</sup> | STEEGformer-s <sup>(l)</sup> |
|-----------|----------|-----------------|--------------------------------|-----------------|--------------------------------|-----------------|--------------------------------|--------------------------------|----------------------|----------------------|------------------------|------------------------|----------------------|----------------------|-----------------------|-----------------------|------------------------------|------------------------------|
|           | AUC      | 0.834<br>±0.033 | <b>0.862</b><br>± <b>0.056</b> | 0.765<br>±0.064 | 0.874<br>± 0.055               | 0.822<br>±0.066 | 0.745<br>±0.064                | 0.836<br>±0.074                | 0.802<br>±0.067      | 0.631<br>±0.016      | 0.578<br>±0.039        | 0.593<br>±0.027        | 0.665<br>±0.019      | 0.830<br>±0.048      | 0.702<br>±0.048       | 0.512<br>±0.018       | 0.713<br>±0.047              | 0.565<br>±0.016              |
|           |          | 0.242<br>±0.038 | <b>0.266</b><br>± <b>0.093</b> | 0.150<br>±0.051 | 0.305<br>± 0.079               | 0.233<br>±0.080 | 0.230<br>±0.076                | 0.211<br>±0.038                | 0.234<br>±0.078      | 0.052<br>±0.012      | 0.042<br>±0.016        | 0.037<br>±0.014        | 0.099<br>±0.015      | 0.183<br>±0.057      | 0.156<br>±0.059       | 0.027<br>±0.006       | 0.207<br>±0.065              | 0.018<br>±0.011              |
|           | Acc.1    | 0.242<br>±0.038 | <b>0.266</b><br>± <b>0.093</b> | 0.151<br>±0.053 | 0.307<br>± 0.078               | 0.233<br>±0.080 | 0.229<br>±0.075                | 0.210<br>±0.036                | 0.232<br>±0.078      | 0.052<br>±0.012      | 0.044<br>±0.016        | 0.038<br>±0.017        | 0.099<br>±0.016      | 0.185<br>±0.056      | 0.158<br>±0.059       | 0.028<br>±0.006       | 0.206<br>±0.064              | 0.019<br>±0.011              |
|           |          | 0.356<br>±0.055 | <b>0.428</b><br>± <b>0.115</b> | 0.256<br>±0.062 | 0.456<br>± 0.114               | 0.336<br>±0.098 | 0.340<br>±0.115                | 0.366<br>±0.090                | 0.342<br>±0.098      | 0.102<br>±0.017      | 0.089<br>±0.025        | 0.077<br>±0.031        | 0.162<br>±0.018      | 0.300<br>±0.069      | 0.242<br>±0.065       | 0.053<br>±0.006       | 0.307<br>±0.088              | 0.048<br>±0.014              |
|           | $\kappa$ | 0.161<br>±0.134 | <b>0.273</b><br>± <b>0.063</b> | 0.114<br>±0.020 | 0.280<br>± 0.051               | 0.164<br>±0.041 | 0.125<br>±0.042                | 0.124<br>±0.049                | 0.189<br>±0.047      | 0.032<br>±0.017      | 0.033<br>±0.012        | 0.037<br>±0.028        | 0.067<br>±0.017      | 0.138<br>±0.022      | 0.195<br>±0.026       | 0.001<br>±0.015       | 0.172<br>±0.028              | 0.000<br>±0.013              |
|           |          | 0.795<br>±0.101 | <b>0.877</b><br>± <b>0.031</b> | 0.767<br>±0.037 | 0.891<br>± 0.019               | 0.795<br>±0.058 | 0.714<br>±0.033                | 0.833<br>±0.024                | 0.800<br>±0.028      | 0.658<br>±0.032      | 0.621<br>±0.023        | 0.661<br>±0.034        | 0.658<br>±0.027      | 0.809<br>±0.036      | 0.774<br>±0.028       | 0.517<br>±0.024       | 0.733<br>±0.009              | 0.577<br>±0.028              |
|           | BAcc     | 0.182<br>±0.131 | <b>0.291</b><br>± <b>0.062</b> | 0.136<br>±0.020 | 0.298<br>± 0.050               | 0.185<br>±0.040 | 0.147<br>±0.041                | 0.146<br>±0.048                | 0.209<br>±0.046      | 0.056<br>±0.016      | 0.058<br>±0.012        | 0.061<br>±0.027        | 0.090<br>±0.017      | 0.159<br>±0.021      | 0.215<br>±0.025       | 0.026<br>±0.015       | 0.193<br>±0.027              | 0.025<br>±0.012              |
|           |          | 0.182<br>±0.131 | <b>0.291</b><br>± <b>0.062</b> | 0.136<br>±0.020 | 0.298<br>± 0.050               | 0.185<br>±0.040 | 0.147<br>±0.043                | 0.144<br>±0.047                | 0.210<br>±0.044      | 0.057<br>±0.015      | 0.059<br>±0.012        | 0.063<br>±0.028        | 0.089<br>±0.017      | 0.160<br>±0.022      | 0.215<br>±0.027       | 0.026<br>±0.015       | 0.191<br>±0.025              | 0.025<br>±0.012              |
|           | Acc.2    | 0.296<br>±0.190 | <b>0.440</b><br>± <b>0.080</b> | 0.235<br>±0.031 | 0.476<br>± 0.061               | 0.294<br>±0.079 | 0.257<br>±0.057                | 0.288<br>±0.058                | 0.322<br>±0.065      | 0.107<br>±0.028      | 0.116<br>±0.010        | 0.114<br>±0.040        | 0.151<br>±0.019      | 0.261<br>±0.036      | 0.324<br>±0.025       | 0.050<br>±0.016       | 0.298<br>±0.027              | 0.049<br>±0.010              |
|           |          | 0.193<br>±0.176 | <b>0.296</b><br>± <b>0.013</b> | 0.176<br>±0.036 | 0.304<br>± 0.056               | 0.171<br>±0.099 | 0.270<br>±0.056                | 0.294<br>±0.058                | 0.225<br>±0.026      | 0.028<br>±0.008      | 0.019<br>±0.015        | 0.014<br>±0.020        | 0.083<br>±0.032      | 0.155<br>±0.026      | 0.205<br>±0.020       | 0.005<br>±0.005       | 0.236<br>±0.044              | 0.019<br>±0.012              |
| Subject16 | AUC      | 0.812<br>±0.152 | 0.913<br>±0.022                | 0.826<br>±0.022 | <b>0.920</b><br>± <b>0.016</b> | 0.807<br>±0.172 | 0.821<br>±0.027                | 0.923<br>± 0.014               | 0.833<br>±0.008      | 0.612<br>±0.014      | 0.578<br>±0.037        | 0.589<br>±0.024        | 0.686<br>±0.026      | 0.830<br>±0.029      | 0.747<br>±0.031       | 0.519<br>±0.023       | 0.775<br>±0.014              | 0.569<br>±0.036              |
|           |          | 0.213<br>±0.172 | <b>0.313</b><br>± <b>0.012</b> | 0.197<br>±0.035 | 0.321<br>± 0.055               | 0.191<br>±0.097 | 0.289<br>±0.055                | 0.312<br>±0.057                | 0.244<br>±0.026      | 0.052<br>±0.008      | 0.044<br>±0.015        | 0.039<br>±0.020        | 0.106<br>±0.031      | 0.176<br>±0.026      | 0.225<br>±0.020       | 0.030<br>±0.005       | 0.256<br>±0.043              | 0.044<br>±0.011              |
|           | BAcc     | 0.213<br>±0.172 | <b>0.313</b><br>± <b>0.012</b> | 0.197<br>±0.035 | 0.323<br>± 0.056               | 0.191<br>±0.097 | 0.291<br>±0.054                | 0.311<br>±0.058                | 0.243<br>±0.025      | 0.052<br>±0.007      | 0.045<br>±0.015        | 0.039<br>±0.019        | 0.106<br>±0.032      | 0.177<br>±0.025      | 0.226<br>±0.019       | 0.030<br>±0.005       | 0.258<br>±0.043              | 0.043<br>±0.011              |
|           |          | 0.318<br>±0.237 | 0.481<br>±0.031                | 0.303<br>±0.037 | 0.513<br>± 0.084               | 0.327<br>±0.159 | 0.461<br>±0.051                | <b>0.504</b><br>± <b>0.073</b> | 0.386<br>±0.017      | 0.094<br>±0.010      | 0.084<br>±0.021        | 0.073<br>±0.022        | 0.180<br>±0.029      | 0.283<br>±0.033      | 0.340<br>±0.036       | 0.061<br>±0.009       | 0.385<br>±0.045              | 0.072<br>±0.018              |
|           | Acc.1    | 0.119<br>±0.015 | 0.181<br>±0.036                | 0.079<br>±0.015 | 0.187<br>±0.058                | 0.112<br>±0.061 | <b>0.286</b><br>± <b>0.042</b> | 0.271<br>±0.050                | 0.194<br>±0.036      | 0.028<br>±0.012      | 0.058<br>±0.027        | 0.034<br>±0.019        | 0.040<br>±0.017      | 0.053<br>±0.027      | 0.349<br>± 0.034      | 0.015<br>±0.006       | 0.224<br>±0.035              | 0.010<br>±0.012              |
|           |          | 0.857<br>±0.017 | 0.846<br>±0.029                | 0.757<br>±0.028 | <b>0.911</b><br>± <b>0.010</b> | 0.790<br>±0.062 | 0.821<br>±0.033                | 0.914<br>± 0.029               | 0.790<br>±0.029      | 0.627<br>±0.013      | 0.611<br>±0.029        | 0.668<br>±0.022        | 0.633<br>±0.018      | 0.801<br>±0.019      | 0.880<br>±0.010       | 0.557<br>±0.014       | 0.771<br>±0.038              | 0.627<br>±0.043              |
| Subject17 | AUC      | 0.857<br>±0.017 | 0.846<br>±0.029                | 0.757<br>±0.028 | <b>0.911</b><br>± <b>0.010</b> | 0.790<br>±0.062 | 0.821<br>±0.033                | 0.914<br>± 0.029               | 0.790<br>±0.029      | 0.627<br>±0.013      | 0.611<br>±0.029        | 0.668<br>±0.022        | 0.633<br>±0.018      | 0.801<br>±0.019      | 0.880<br>±0.010       | 0.557<br>±0.014       | 0.771<br>±0.038              | 0.627<br>±0.043              |
|           |          | 0.857<br>±0.017 | 0.846<br>±0.029                | 0.757<br>±0.028 | <b>0.911</b><br>± <b>0.010</b> | 0.790<br>±0.062 | 0.821<br>±0.033                | 0.914<br>± 0.029               | 0.790<br>±0.029      | 0.627<br>±0.013      | 0.611<br>±0.029        | 0.668<br>±0.022        | 0.633<br>±0.018      | 0.801<br>±0.019      | 0.880<br>±0.010       | 0.557<br>±0.014       | 0.771<br>±0.038              | 0.627<br>±0.043              |

Continued on next page

| Subject   | Metric   | DeepConvnet | EEGNet       | Conformer   | CTNet        | SSVEPDNN    | BIOT (f)     | BIOT (l)     | BENDR (f)   | BENDR (l)   | CBraMod (f) | CBraMod (l) | EEGPT (f)   | EEGPT (l)   | LaBraM (f)   | LaBraM (l)  | STEEGformer-s (f) | STEEGformer-s (l) |
|-----------|----------|-------------|--------------|-------------|--------------|-------------|--------------|--------------|-------------|-------------|-------------|-------------|-------------|-------------|--------------|-------------|-------------------|-------------------|
| Subject1  | BAcc     | 0.141       | 0.202        | 0.102       | 0.207        | 0.134       | <b>0.304</b> | 0.289        | 0.214       | 0.053       | 0.081       | 0.058       | 0.064       | 0.076       | 0.365        | 0.040       | 0.244             | 0.035             |
|           |          | $\pm 0.015$ | $\pm 0.035$  | $\pm 0.015$ | $\pm 0.056$  | $\pm 0.059$ | $\pm 0.041$  | $\pm 0.049$  | $\pm 0.035$ | $\pm 0.011$ | $\pm 0.026$ | $\pm 0.019$ | $\pm 0.016$ | $\pm 0.027$ | $\pm 0.033$  | $\pm 0.006$ | $\pm 0.034$       | $\pm 0.012$       |
|           | Acc.1    | 0.141       | 0.202        | 0.102       | 0.207        | 0.134       | <b>0.301</b> | 0.286        | 0.212       | 0.052       | 0.081       | 0.061       | 0.063       | 0.075       | 0.362        | 0.039       | 0.241             | 0.034             |
|           |          | $\pm 0.015$ | $\pm 0.035$  | $\pm 0.015$ | $\pm 0.056$  | $\pm 0.059$ | $\pm 0.041$  | $\pm 0.049$  | $\pm 0.035$ | $\pm 0.011$ | $\pm 0.026$ | $\pm 0.018$ | $\pm 0.016$ | $\pm 0.026$ | $\pm 0.034$  | $\pm 0.007$ | $\pm 0.035$       | $\pm 0.011$       |
|           | Acc.2    | 0.243       | 0.320        | 0.190       | 0.332        | 0.228       | 0.468        | <b>0.476</b> | 0.324       | 0.092       | 0.134       | 0.112       | 0.113       | 0.151       | 0.530        | 0.068       | 0.377             | 0.064             |
|           |          | $\pm 0.033$ | $\pm 0.037$  | $\pm 0.026$ | $\pm 0.071$  | $\pm 0.085$ | $\pm 0.061$  | $\pm 0.059$  | $\pm 0.048$ | $\pm 0.011$ | $\pm 0.036$ | $\pm 0.023$ | $\pm 0.011$ | $\pm 0.034$ | $\pm 0.044$  | $\pm 0.008$ | $\pm 0.070$       | $\pm 0.011$       |
| Subject19 | $\kappa$ | 0.065       | 0.146        | 0.051       | <b>0.124</b> | 0.072       | 0.106        | 0.096        | 0.080       | 0.027       | 0.028       | 0.029       | 0.036       | 0.063       | 0.104        | 0.003       | 0.083             | 0.014             |
|           |          | $\pm 0.036$ | $\pm 0.031$  | $\pm 0.019$ | $\pm 0.025$  | $\pm 0.037$ | $\pm 0.020$  | $\pm 0.023$  | $\pm 0.020$ | $\pm 0.008$ | $\pm 0.014$ | $\pm 0.021$ | $\pm 0.017$ | $\pm 0.013$ | $\pm 0.020$  | $\pm 0.010$ | $\pm 0.023$       | $\pm 0.005$       |
|           | AUC      | 0.792       | <b>0.805</b> | 0.729       | 0.849        | 0.760       | 0.646        | 0.748        | 0.692       | 0.652       | 0.598       | 0.686       | 0.617       | 0.760       | 0.703        | 0.546       | 0.655             | 0.644             |
|           |          | $\pm 0.050$ | $\pm 0.029$  | $\pm 0.034$ | $\pm 0.026$  | $\pm 0.022$ | $\pm 0.021$  | $\pm 0.023$  | $\pm 0.011$ | $\pm 0.005$ | $\pm 0.051$ | $\pm 0.026$ | $\pm 0.020$ | $\pm 0.015$ | $\pm 0.033$  | $\pm 0.025$ | $\pm 0.016$       | $\pm 0.034$       |
|           | BAcc     | 0.089       | 0.167        | 0.075       | <b>0.146</b> | 0.095       | 0.129        | 0.119        | 0.103       | 0.051       | 0.052       | 0.054       | 0.060       | 0.087       | 0.127        | 0.028       | 0.105             | 0.039             |
|           |          | $\pm 0.035$ | $\pm 0.030$  | $\pm 0.019$ | $\pm 0.024$  | $\pm 0.036$ | $\pm 0.020$  | $\pm 0.023$  | $\pm 0.020$ | $\pm 0.008$ | $\pm 0.014$ | $\pm 0.021$ | $\pm 0.017$ | $\pm 0.013$ | $\pm 0.019$  | $\pm 0.010$ | $\pm 0.022$       | $\pm 0.005$       |
| Subject2  | Acc.1    | 0.088       | 0.167        | 0.075       | <b>0.146</b> | 0.095       | 0.129        | 0.117        | 0.103       | 0.051       | 0.051       | 0.054       | 0.060       | 0.087       | 0.128        | 0.028       | 0.105             | 0.038             |
|           |          | $\pm 0.035$ | $\pm 0.030$  | $\pm 0.019$ | $\pm 0.026$  | $\pm 0.036$ | $\pm 0.020$  | $\pm 0.022$  | $\pm 0.020$ | $\pm 0.008$ | $\pm 0.013$ | $\pm 0.022$ | $\pm 0.016$ | $\pm 0.013$ | $\pm 0.020$  | $\pm 0.010$ | $\pm 0.023$       | $\pm 0.004$       |
|           | Acc.2    | 0.153       | 0.277        | 0.146       | <b>0.251</b> | 0.175       | 0.196        | 0.219        | 0.185       | 0.107       | 0.091       | 0.113       | 0.116       | 0.170       | 0.223        | 0.057       | 0.196             | 0.067             |
|           |          | $\pm 0.045$ | $\pm 0.025$  | $\pm 0.018$ | $\pm 0.046$  | $\pm 0.044$ | $\pm 0.019$  | $\pm 0.039$  | $\pm 0.024$ | $\pm 0.014$ | $\pm 0.015$ | $\pm 0.031$ | $\pm 0.028$ | $\pm 0.029$ | $\pm 0.033$  | $\pm 0.013$ | $\pm 0.037$       | $\pm 0.009$       |
|           | $\kappa$ | 0.034       | 0.057        | 0.062       | <b>0.086</b> | 0.049       | 0.081        | 0.076        | 0.041       | 0.014       | 0.027       | 0.025       | 0.024       | 0.064       | 0.094        | 0.014       | 0.073             | 0.008             |
|           |          | $\pm 0.011$ | $\pm 0.044$  | $\pm 0.033$ | $\pm 0.037$  | $\pm 0.011$ | $\pm 0.033$  | $\pm 0.049$  | $\pm 0.011$ | $\pm 0.002$ | $\pm 0.029$ | $\pm 0.017$ | $\pm 0.013$ | $\pm 0.022$ | $\pm 0.031$  | $\pm 0.014$ | $\pm 0.041$       | $\pm 0.011$       |
| Subject20 | AUC      | 0.706       | 0.699        | 0.715       | 0.757        | 0.681       | 0.648        | <b>0.715</b> | 0.608       | 0.580       | 0.583       | 0.622       | 0.573       | 0.712       | 0.660        | 0.521       | 0.632             | 0.586             |
|           |          | $\pm 0.027$ | $\pm 0.038$  | $\pm 0.021$ | $\pm 0.042$  | $\pm 0.033$ | $\pm 0.034$  | $\pm 0.047$  | $\pm 0.032$ | $\pm 0.032$ | $\pm 0.034$ | $\pm 0.042$ | $\pm 0.025$ | $\pm 0.050$ | $\pm 0.026$  | $\pm 0.027$ | $\pm 0.047$       | $\pm 0.034$       |
|           | BAcc     | 0.058       | 0.080        | 0.086       | <b>0.109</b> | 0.073       | 0.104        | 0.099        | 0.065       | 0.039       | 0.051       | 0.050       | 0.049       | 0.088       | 0.117        | 0.038       | 0.096             | 0.033             |
|           |          | $\pm 0.011$ | $\pm 0.043$  | $\pm 0.032$ | $\pm 0.036$  | $\pm 0.010$ | $\pm 0.032$  | $\pm 0.048$  | $\pm 0.011$ | $\pm 0.002$ | $\pm 0.028$ | $\pm 0.017$ | $\pm 0.013$ | $\pm 0.022$ | $\pm 0.031$  | $\pm 0.013$ | $\pm 0.040$       | $\pm 0.011$       |
|           | Acc.1    | 0.058       | 0.080        | 0.086       | <b>0.108</b> | 0.073       | 0.105        | 0.098        | 0.065       | 0.039       | 0.053       | 0.051       | 0.049       | 0.088       | 0.119        | 0.038       | 0.100             | 0.033             |
|           |          | $\pm 0.011$ | $\pm 0.043$  | $\pm 0.032$ | $\pm 0.038$  | $\pm 0.010$ | $\pm 0.032$  | $\pm 0.047$  | $\pm 0.011$ | $\pm 0.002$ | $\pm 0.030$ | $\pm 0.019$ | $\pm 0.013$ | $\pm 0.021$ | $\pm 0.033$  | $\pm 0.013$ | $\pm 0.045$       | $\pm 0.011$       |
| Subject20 | Acc.2    | 0.112       | 0.163        | 0.156       | 0.194        | 0.136       | 0.184        | 0.182        | 0.114       | 0.077       | 0.100       | 0.096       | 0.088       | 0.164       | <b>0.186</b> | 0.065       | 0.156             | 0.072             |
|           |          | $\pm 0.030$ | $\pm 0.061$  | $\pm 0.038$ | $\pm 0.058$  | $\pm 0.020$ | $\pm 0.040$  | $\pm 0.052$  | $\pm 0.023$ | $\pm 0.013$ | $\pm 0.032$ | $\pm 0.026$ | $\pm 0.027$ | $\pm 0.036$ | $\pm 0.037$  | $\pm 0.013$ | $\pm 0.054$       | $\pm 0.010$       |
|           | $\kappa$ | 0.093       | 0.229        | 0.080       | 0.227        | 0.147       | 0.246        | <b>0.265</b> | 0.157       | 0.052       | 0.035       | 0.054       | 0.092       | 0.193       | 0.266        | 0.010       | 0.242             | 0.022             |
|           |          | $\pm 0.026$ | $\pm 0.049$  | $\pm 0.029$ | $\pm 0.094$  | $\pm 0.037$ | $\pm 0.046$  | $\pm 0.044$  | $\pm 0.015$ | $\pm 0.014$ | $\pm 0.033$ | $\pm 0.027$ | $\pm 0.026$ | $\pm 0.040$ | $\pm 0.058$  | $\pm 0.011$ | $\pm 0.077$       | $\pm 0.021$       |
|           | AUC      | 0.831       | 0.866        | 0.768       | 0.894        | 0.811       | 0.798        | <b>0.893</b> | 0.743       | 0.693       | 0.627       | 0.700       | 0.677       | 0.856       | 0.791        | 0.564       | 0.774             | 0.651             |
|           |          | $\pm 0.018$ | $\pm 0.011$  | $\pm 0.041$ | $\pm 0.015$  | $\pm 0.010$ | $\pm 0.013$  | $\pm 0.020$  | $\pm 0.016$ | $\pm 0.016$ | $\pm 0.030$ | $\pm 0.037$ | $\pm 0.022$ | $\pm 0.006$ | $\pm 0.046$  | $\pm 0.032$ | $\pm 0.032$       | $\pm 0.021$       |
| Subject20 | BAcc     | 0.116       | 0.249        | 0.103       | 0.246        | 0.168       | 0.265        | <b>0.283</b> | 0.178       | 0.076       | 0.059       | 0.077       | 0.115       | 0.213       | 0.285        | 0.035       | 0.261             | 0.046             |
|           |          | $\pm 0.025$ | $\pm 0.048$  | $\pm 0.028$ | $\pm 0.092$  | $\pm 0.036$ | $\pm 0.045$  | $\pm 0.043$  | $\pm 0.014$ | $\pm 0.013$ | $\pm 0.032$ | $\pm 0.026$ | $\pm 0.026$ | $\pm 0.039$ | $\pm 0.056$  | $\pm 0.011$ | $\pm 0.075$       | $\pm 0.020$       |

Continued on next page

| Subject   | Metric   | DeepConvnet     | EEGNet                         | Conformer       | CTNet                          | SSVEPDNN        | BIOT (f)                       | BIOT (l)                       | BENDR (f)       | BENDR (l)       | CBraMod (f)     | CBraMod (l)     | EEGPT (f)       | EEGPT (l)               | LaBraM (f)              | LaBraM (l)      | STEEGformer-s (f) | STEEGformer-s (l) |
|-----------|----------|-----------------|--------------------------------|-----------------|--------------------------------|-----------------|--------------------------------|--------------------------------|-----------------|-----------------|-----------------|-----------------|-----------------|-------------------------|-------------------------|-----------------|-------------------|-------------------|
|           | Acc.1    | 0.116<br>±0.025 | 0.249<br>±0.048                | 0.102<br>±0.027 | 0.248<br>±0.093                | 0.168<br>±0.036 | 0.265<br>±0.048                | <b>0.282</b><br>± <b>0.043</b> | 0.179<br>±0.014 | 0.076<br>±0.014 | 0.059<br>±0.032 | 0.078<br>±0.026 | 0.115<br>±0.025 | 0.211<br>±0.040         | <b>0.288</b><br>± 0.058 | 0.035<br>±0.011 | 0.263<br>±0.078   | 0.046<br>±0.020   |
|           | Acc.2    | 0.217<br>±0.024 | 0.359<br>±0.022                | 0.194<br>±0.054 | 0.387<br>±0.087                | 0.266<br>±0.043 | <b>0.406</b><br>± <b>0.055</b> | <b>0.468</b><br>± 0.045        | 0.272<br>±0.014 | 0.141<br>±0.020 | 0.124<br>±0.058 | 0.138<br>±0.030 | 0.182<br>±0.032 | 0.338<br>±0.035         | <b>0.403</b><br>±0.072  | 0.071<br>±0.018 | 0.380<br>±0.082   | 0.083<br>±0.028   |
| Subject21 | $\kappa$ | 0.257<br>±0.184 | <b>0.367</b><br>± <b>0.033</b> | 0.203<br>±0.063 | <b>0.388</b><br>± 0.039        | 0.216<br>±0.031 | 0.228<br>±0.051                | 0.278<br>±0.060                | 0.238<br>±0.021 | 0.028<br>±0.016 | 0.037<br>±0.033 | 0.007<br>±0.014 | 0.093<br>±0.008 | 0.282<br>±0.019         | 0.174<br>±0.038         | 0.007<br>±0.012 | 0.263<br>±0.016   | 0.037<br>±0.018   |
|           | AUC      | 0.875<br>±0.092 | <b>0.930</b><br>± <b>0.015</b> | 0.861<br>±0.030 | <b>0.943</b><br>± 0.015        | 0.880<br>±0.023 | 0.784<br>±0.045                | 0.904<br>±0.021                | 0.819<br>±0.014 | 0.676<br>±0.017 | 0.619<br>±0.046 | 0.533<br>±0.040 | 0.707<br>±0.026 | 0.899<br>±0.008         | 0.784<br>±0.016         | 0.531<br>±0.017 | 0.803<br>±0.021   | 0.670<br>±0.035   |
|           | BAcc     | 0.276<br>±0.179 | <b>0.383</b><br>± <b>0.032</b> | 0.223<br>±0.061 | <b>0.404</b><br>± 0.038        | 0.236<br>±0.030 | 0.247<br>±0.050                | 0.296<br>±0.058                | 0.257<br>±0.021 | 0.053<br>±0.015 | 0.061<br>±0.032 | 0.032<br>±0.014 | 0.116<br>±0.008 | 0.300<br>±0.019         | 0.195<br>±0.037         | 0.032<br>±0.012 | 0.282<br>±0.016   | 0.061<br>±0.018   |
|           | Acc.1    | 0.276<br>±0.180 | <b>0.380</b><br>± <b>0.033</b> | 0.220<br>±0.061 | <b>0.406</b><br>± 0.039        | 0.236<br>±0.030 | 0.246<br>±0.052                | 0.293<br>±0.058                | 0.256<br>±0.022 | 0.053<br>±0.015 | 0.063<br>±0.033 | 0.032<br>±0.014 | 0.117<br>±0.007 | 0.301<br>±0.018         | 0.197<br>±0.038         | 0.032<br>±0.012 | 0.281<br>±0.019   | 0.061<br>±0.019   |
|           | Acc.2    | 0.406<br>±0.227 | <b>0.548</b><br>± <b>0.048</b> | 0.359<br>±0.068 | <b>0.580</b><br>± 0.047        | 0.386<br>±0.029 | 0.401<br>±0.036                | 0.461<br>±0.047                | 0.382<br>±0.037 | 0.107<br>±0.024 | 0.122<br>±0.040 | 0.060<br>±0.007 | 0.176<br>±0.009 | 0.451<br>±0.029         | 0.321<br>±0.051         | 0.057<br>±0.016 | 0.424<br>±0.047   | 0.108<br>±0.027   |
|           | $\kappa$ | 0.346<br>±0.295 | <b>0.492</b><br>± <b>0.031</b> | 0.363<br>±0.035 | <b>0.577</b><br>± 0.069        | 0.325<br>±0.060 | 0.420<br>±0.072                | 0.413<br>±0.019                | 0.367<br>±0.047 | 0.049<br>±0.012 | 0.044<br>±0.028 | 0.032<br>±0.011 | 0.131<br>±0.028 | 0.390<br>±0.031         | 0.368<br>±0.038         | 0.019<br>±0.007 | 0.259<br>±0.033   | 0.024<br>±0.013   |
|           | AUC      | 0.894<br>±0.105 | 0.960<br>±0.008                | 0.920<br>±0.019 | <b>0.970</b><br>± 0.007        | 0.906<br>±0.018 | 0.891<br>±0.039                | <b>0.963</b><br>± <b>0.004</b> | 0.908<br>±0.007 | 0.692<br>±0.018 | 0.619<br>±0.026 | 0.655<br>±0.019 | 0.724<br>±0.024 | 0.926<br>±0.007         | 0.857<br>±0.021         | 0.577<br>±0.027 | 0.796<br>±0.028   | 0.644<br>±0.036   |
| Subject22 | BAcc     | 0.362<br>±0.287 | <b>0.505</b><br>± <b>0.031</b> | 0.379<br>±0.034 | <b>0.587</b><br>± 0.067        | 0.342<br>±0.059 | 0.435<br>±0.071                | 0.428<br>±0.018                | 0.383<br>±0.046 | 0.073<br>±0.011 | 0.068<br>±0.027 | 0.056<br>±0.011 | 0.153<br>±0.027 | 0.405<br>±0.030         | 0.384<br>±0.037         | 0.044<br>±0.007 | 0.277<br>±0.033   | 0.048<br>±0.013   |
|           | Acc.1    | 0.362<br>±0.287 | <b>0.505</b><br>± <b>0.031</b> | 0.379<br>±0.034 | <b>0.587</b><br>± 0.067        | 0.342<br>±0.059 | 0.436<br>±0.070                | 0.427<br>±0.021                | 0.384<br>±0.044 | 0.073<br>±0.012 | 0.070<br>±0.028 | 0.058<br>±0.013 | 0.153<br>±0.027 | 0.406<br>±0.028         | 0.388<br>±0.034         | 0.044<br>±0.008 | 0.282<br>±0.029   | 0.047<br>±0.013   |
|           | Acc.2    | 0.493<br>±0.344 | 0.688<br>±0.024                | 0.545<br>±0.049 | <b>0.773</b><br>± 0.072        | 0.496<br>±0.071 | 0.664<br>±0.076                | <b>0.701</b><br>± <b>0.028</b> | 0.549<br>±0.025 | 0.131<br>±0.021 | 0.143<br>±0.025 | 0.111<br>±0.009 | 0.235<br>±0.024 | 0.572<br>±0.033         | 0.509<br>±0.036         | 0.079<br>±0.010 | 0.406<br>±0.049   | 0.088<br>±0.017   |
|           | $\kappa$ | 0.021<br>±0.010 | 0.028<br>±0.020                | 0.021<br>±0.015 | <b>0.045</b><br>± <b>0.024</b> | 0.026<br>±0.019 | 0.008<br>±0.010                | 0.002<br>±0.008                | 0.034<br>±0.004 | 0.028<br>±0.011 | 0.033<br>±0.020 | 0.029<br>±0.009 | 0.023<br>±0.019 | <b>0.045</b><br>± 0.006 | 0.034<br>±0.016         | 0.003<br>±0.008 | 0.005<br>±0.011   | 0.003<br>±0.018   |
|           | AUC      | 0.659<br>±0.026 | <b>0.669</b><br>± <b>0.034</b> | 0.633<br>±0.053 | 0.644<br>±0.021                | 0.648<br>±0.035 | 0.532<br>±0.030                | 0.514<br>±0.023                | 0.582<br>±0.019 | 0.657<br>±0.013 | 0.604<br>±0.042 | 0.669<br>±0.020 | 0.575<br>±0.019 | <b>0.680</b><br>± 0.025 | 0.601<br>±0.024         | 0.523<br>±0.012 | 0.556<br>±0.012   | 0.541<br>±0.019   |
| Subject23 | BAcc     | 0.046<br>±0.009 | 0.053<br>±0.020                | 0.045<br>±0.015 | <b>0.069</b><br>± <b>0.023</b> | 0.050<br>±0.018 | 0.033<br>±0.010                | 0.027<br>±0.008                | 0.058<br>±0.003 | 0.053<br>±0.011 | 0.057<br>±0.019 | 0.054<br>±0.009 | 0.048<br>±0.018 | <b>0.069</b><br>± 0.006 | 0.059<br>±0.016         | 0.028<br>±0.008 | 0.030<br>±0.010   | 0.028<br>±0.018   |
|           | Acc.1    | 0.046<br>±0.009 | 0.053<br>±0.020                | 0.045<br>±0.015 | <b>0.068</b><br>± <b>0.023</b> | 0.050<br>±0.018 | 0.033<br>±0.010                | 0.028<br>±0.010                | 0.057<br>±0.004 | 0.054<br>±0.011 | 0.058<br>±0.019 | 0.055<br>±0.010 | 0.048<br>±0.019 | <b>0.072</b><br>± 0.006 | 0.061<br>±0.014         | 0.028<br>±0.007 | 0.031<br>±0.011   | 0.028<br>±0.017   |

Continued on next page

| Subject   | Metric   | DeepConvnet     | EEGNet          | Conformer       | CTNet           | SSVEPDNN        | BIOT <sup>(i)</sup> | BIOT <sup>(i)</sup> | BENDR <sup>(i)</sup> | BENDR <sup>(i)</sup> | CBraMod <sup>(i)</sup> | CBraMod <sup>(i)</sup> | EEGPT <sup>(i)</sup> | EEGPT <sup>(i)</sup> | LaBraM <sup>(i)</sup> | LaBraM <sup>(i)</sup> | STEEGformer-s <sup>(i)</sup> | STEEGformer-s <sup>(i)</sup> |
|-----------|----------|-----------------|-----------------|-----------------|-----------------|-----------------|---------------------|---------------------|----------------------|----------------------|------------------------|------------------------|----------------------|----------------------|-----------------------|-----------------------|------------------------------|------------------------------|
|           | Acc.2    | 0.091<br>±0.013 | 0.098<br>±0.025 | 0.087<br>±0.032 | 0.106<br>±0.023 | 0.092<br>±0.028 | 0.070<br>±0.020     | 0.059<br>±0.014     | 0.103<br>±0.004      | 0.108<br>±0.003      | 0.105<br>±0.030        | 0.110<br>±0.015        | 0.085<br>±0.025      | 0.137<br>±0.013      | 0.119<br>±0.021       | 0.059<br>±0.011       | 0.069<br>±0.020              | 0.056<br>±0.017              |
| Subject24 | $\kappa$ | 0.026<br>±0.010 | 0.042<br>±0.016 | 0.032<br>±0.023 | 0.041<br>±0.012 | 0.042<br>±0.010 | 0.033<br>±0.015     | 0.029<br>±0.009     | 0.040<br>±0.021      | 0.021<br>±0.008      | 0.035<br>±0.015        | 0.027<br>±0.013        | 0.039<br>±0.015      | 0.067<br>±0.019      | 0.062<br>±0.016       | 0.005<br>±0.010       | 0.031<br>±0.013              | 0.020<br>±0.017              |
|           | AUC      | 0.686<br>±0.041 | 0.690<br>±0.033 | 0.653<br>±0.025 | 0.719<br>±0.022 | 0.642<br>±0.023 | 0.573<br>±0.014     | 0.628<br>±0.011     | 0.621<br>±0.026      | 0.621<br>±0.029      | 0.621<br>±0.032        | 0.668<br>±0.010        | 0.600<br>±0.016      | 0.743<br>±0.021      | 0.653<br>±0.028       | 0.543<br>±0.022       | 0.570<br>±0.015              | 0.617<br>±0.041              |
|           | BAcc     | 0.050<br>±0.010 | 0.066<br>±0.015 | 0.056<br>±0.022 | 0.065<br>±0.012 | 0.066<br>±0.010 | 0.057<br>±0.015     | 0.054<br>±0.009     | 0.064<br>±0.021      | 0.045<br>±0.008      | 0.059<br>±0.014        | 0.051<br>±0.013        | 0.063<br>±0.015      | 0.090<br>±0.019      | 0.086<br>±0.015       | 0.030<br>±0.009       | 0.055<br>±0.013              | 0.044<br>±0.017              |
|           | Acc.1    | 0.050<br>±0.010 | 0.066<br>±0.015 | 0.056<br>±0.022 | 0.064<br>±0.012 | 0.066<br>±0.010 | 0.056<br>±0.015     | 0.053<br>±0.009     | 0.064<br>±0.022      | 0.046<br>±0.007      | 0.060<br>±0.014        | 0.054<br>±0.015        | 0.063<br>±0.014      | 0.090<br>±0.020      | 0.085<br>±0.016       | 0.029<br>±0.010       | 0.055<br>±0.013              | 0.043<br>±0.016              |
|           | Acc.2    | 0.101<br>±0.026 | 0.126<br>±0.016 | 0.117<br>±0.026 | 0.106<br>±0.014 | 0.118<br>±0.008 | 0.106<br>±0.015     | 0.104<br>±0.020     | 0.120<br>±0.022      | 0.094<br>±0.013      | 0.114<br>±0.012        | 0.105<br>±0.019        | 0.108<br>±0.015      | 0.159<br>±0.019      | 0.155<br>±0.026       | 0.058<br>±0.004       | 0.103<br>±0.031              | 0.069<br>±0.012              |
|           | $\kappa$ | 0.021<br>±0.016 | 0.015<br>±0.009 | 0.009<br>±0.007 | 0.010<br>±0.012 | 0.016<br>±0.002 | 0.028<br>±0.016     | 0.007<br>±0.008     | 0.035<br>±0.014      | 0.002<br>±0.014      | 0.049<br>±0.016        | 0.036<br>±0.015        | 0.014<br>±0.004      | 0.028<br>±0.010      | 0.065<br>±0.022       | 0.005<br>±0.007       | 0.037<br>±0.010              | 0.006<br>±0.018              |
| Subject25 | AUC      | 0.651<br>±0.019 | 0.624<br>±0.018 | 0.577<br>±0.018 | 0.566<br>±0.018 | 0.634<br>±0.024 | 0.567<br>±0.028     | 0.528<br>±0.058     | 0.611<br>±0.020      | 0.537<br>±0.013      | 0.622<br>±0.038        | 0.652<br>±0.015        | 0.566<br>±0.012      | 0.638<br>±0.008      | 0.614<br>±0.034       | 0.553<br>±0.044       | 0.593<br>±0.022              | 0.606<br>±0.046              |
|           | BAcc     | 0.045<br>±0.016 | 0.040<br>±0.009 | 0.034<br>±0.007 | 0.035<br>±0.012 | 0.040<br>±0.002 | 0.053<br>±0.016     | 0.032<br>±0.008     | 0.059<br>±0.014      | 0.027<br>±0.014      | 0.073<br>±0.015        | 0.060<br>±0.014        | 0.039<br>±0.004      | 0.053<br>±0.009      | 0.088<br>±0.021       | 0.030<br>±0.007       | 0.061<br>±0.009              | 0.030<br>±0.018              |
|           | Acc.1    | 0.045<br>±0.016 | 0.040<br>±0.009 | 0.034<br>±0.007 | 0.037<br>±0.011 | 0.040<br>±0.002 | 0.053<br>±0.016     | 0.033<br>±0.008     | 0.059<br>±0.013      | 0.027<br>±0.014      | 0.074<br>±0.017        | 0.064<br>±0.017        | 0.040<br>±0.005      | 0.055<br>±0.009      | 0.088<br>±0.021       | 0.030<br>±0.006       | 0.062<br>±0.010              | 0.030<br>±0.017              |
|           | Acc.2    | 0.084<br>±0.008 | 0.074<br>±0.013 | 0.064<br>±0.007 | 0.072<br>±0.021 | 0.085<br>±0.008 | 0.099<br>±0.033     | 0.058<br>±0.009     | 0.114<br>±0.022      | 0.059<br>±0.015      | 0.141<br>±0.011        | 0.116<br>±0.020        | 0.074<br>±0.008      | 0.093<br>±0.013      | 0.165<br>±0.021       | 0.065<br>±0.016       | 0.115<br>±0.011              | 0.074<br>±0.016              |
|           | $\kappa$ | 0.118<br>±0.029 | 0.117<br>±0.026 | 0.106<br>±0.025 | 0.189<br>±0.016 | 0.090<br>±0.017 | 0.142<br>±0.042     | 0.135<br>±0.044     | 0.079<br>±0.017      | 0.034<br>±0.013      | 0.030<br>±0.020        | 0.034<br>±0.015        | 0.030<br>±0.011      | 0.072<br>±0.021      | 0.100<br>±0.018       | 0.003<br>±0.008       | 0.107<br>±0.040              | 0.011<br>±0.005              |
|           | AUC      | 0.799<br>±0.013 | 0.792<br>±0.022 | 0.770<br>±0.028 | 0.852<br>±0.005 | 0.761<br>±0.016 | 0.706<br>±0.040     | 0.767<br>±0.042     | 0.679<br>±0.019      | 0.667<br>±0.016      | 0.610<br>±0.038        | 0.653<br>±0.019        | 0.623<br>±0.015      | 0.774<br>±0.019      | 0.671<br>±0.024       | 0.541<br>±0.012       | 0.671<br>±0.038              | 0.590<br>±0.021              |
| Subject26 | BAcc     | 0.140<br>±0.029 | 0.140<br>±0.026 | 0.129<br>±0.024 | 0.209<br>±0.015 | 0.113<br>±0.017 | 0.163<br>±0.041     | 0.156<br>±0.043     | 0.102<br>±0.017      | 0.058<br>±0.013      | 0.055<br>±0.019        | 0.059<br>±0.014        | 0.054<br>±0.011      | 0.095<br>±0.020      | 0.123<br>±0.017       | 0.028<br>±0.008       | 0.130<br>±0.039              | 0.036<br>±0.005              |
|           | Acc.1    | 0.140<br>±0.029 | 0.140<br>±0.026 | 0.129<br>±0.024 | 0.209<br>±0.015 | 0.113<br>±0.017 | 0.163<br>±0.042     | 0.156<br>±0.043     | 0.102<br>±0.018      | 0.058<br>±0.013      | 0.056<br>±0.018        | 0.059<br>±0.015        | 0.054<br>±0.011      | 0.097<br>±0.020      | 0.123<br>±0.018       | 0.029<br>±0.007       | 0.129<br>±0.040              | 0.036<br>±0.005              |
|           | Acc.2    | 0.230<br>±0.034 | 0.213<br>±0.029 | 0.221<br>±0.028 | 0.340<br>±0.033 | 0.195<br>±0.033 | 0.260<br>±0.044     | 0.259<br>±0.078     | 0.169<br>±0.029      | 0.107<br>±0.016      | 0.107<br>±0.021        | 0.112<br>±0.022        | 0.108<br>±0.016      | 0.190<br>±0.027      | 0.208<br>±0.038       | 0.058<br>±0.016       | 0.208<br>±0.043              | 0.077<br>±0.013              |

Continued on next page



| Subject   | Metric   | DeepConvnet                 | EEGNet                      | Conformer            | CTNet                       | SSVEPDNN             | BIOT (f)             | BIOT (l)             | BENDR (f)            | BENDR (l)            | CBraMod (f)          | CBraMod (l)          | EEGPT (f)            | EEGPT (l)            | LaBraM (f)                  | LaBraM (l)            | STEEGformer-s (f)    | STEEGformer-s (l)     |
|-----------|----------|-----------------------------|-----------------------------|----------------------|-----------------------------|----------------------|----------------------|----------------------|----------------------|----------------------|----------------------|----------------------|----------------------|----------------------|-----------------------------|-----------------------|----------------------|-----------------------|
| Subject27 | $\kappa$ | 0.059<br>$\pm 0.018$        | 0.107<br>$\pm 0.038$        | 0.042<br>$\pm 0.013$ | <b>0.098</b><br>$\pm 0.016$ | 0.042<br>$\pm 0.023$ | 0.028<br>$\pm 0.019$ | 0.052<br>$\pm 0.016$ | 0.088<br>$\pm 0.031$ | 0.024<br>$\pm 0.011$ | 0.021<br>$\pm 0.015$ | 0.025<br>$\pm 0.016$ | 0.025<br>$\pm 0.011$ | 0.084<br>$\pm 0.027$ | 0.087<br>$\pm 0.024$        | -0.002<br>$\pm 0.009$ | 0.044<br>$\pm 0.033$ | -0.006<br>$\pm 0.016$ |
|           | AUC      | 0.743<br>$\pm 0.016$        | <b>0.757</b><br>$\pm 0.027$ | 0.683<br>$\pm 0.029$ | 0.761<br>$\pm 0.012$        | 0.689<br>$\pm 0.016$ | 0.584<br>$\pm 0.024$ | 0.692<br>$\pm 0.047$ | 0.664<br>$\pm 0.034$ | 0.624<br>$\pm 0.024$ | 0.558<br>$\pm 0.020$ | 0.633<br>$\pm 0.019$ | 0.603<br>$\pm 0.015$ | 0.734<br>$\pm 0.032$ | 0.662<br>$\pm 0.022$        | 0.501<br>$\pm 0.007$  | 0.592<br>$\pm 0.041$ | 0.550<br>$\pm 0.031$  |
|           | BAcc     | 0.082<br>$\pm 0.017$        | 0.129<br>$\pm 0.037$        | 0.066<br>$\pm 0.012$ | <b>0.121</b><br>$\pm 0.016$ | 0.066<br>$\pm 0.023$ | 0.052<br>$\pm 0.019$ | 0.076<br>$\pm 0.015$ | 0.111<br>$\pm 0.030$ | 0.048<br>$\pm 0.010$ | 0.045<br>$\pm 0.015$ | 0.050<br>$\pm 0.016$ | 0.049<br>$\pm 0.011$ | 0.107<br>$\pm 0.026$ | 0.110<br>$\pm 0.023$        | 0.023<br>$\pm 0.009$  | 0.068<br>$\pm 0.032$ | 0.019<br>$\pm 0.015$  |
|           | Acc.1    | 0.082<br>$\pm 0.017$        | 0.129<br>$\pm 0.037$        | 0.066<br>$\pm 0.012$ | <b>0.123</b><br>$\pm 0.018$ | 0.066<br>$\pm 0.023$ | 0.054<br>$\pm 0.019$ | 0.076<br>$\pm 0.015$ | 0.111<br>$\pm 0.030$ | 0.048<br>$\pm 0.010$ | 0.044<br>$\pm 0.014$ | 0.049<br>$\pm 0.016$ | 0.049<br>$\pm 0.011$ | 0.106<br>$\pm 0.025$ | 0.109<br>$\pm 0.023$        | 0.024<br>$\pm 0.009$  | 0.068<br>$\pm 0.033$ | 0.020<br>$\pm 0.015$  |
|           | Acc.2    | 0.154<br>$\pm 0.020$        | 0.222<br>$\pm 0.040$        | 0.109<br>$\pm 0.032$ | <b>0.208</b><br>$\pm 0.038$ | 0.122<br>$\pm 0.027$ | 0.117<br>$\pm 0.041$ | 0.143<br>$\pm 0.034$ | 0.185<br>$\pm 0.045$ | 0.098<br>$\pm 0.022$ | 0.079<br>$\pm 0.007$ | 0.091<br>$\pm 0.013$ | 0.094<br>$\pm 0.015$ | 0.177<br>$\pm 0.038$ | 0.191<br>$\pm 0.039$        | 0.048<br>$\pm 0.015$  | 0.123<br>$\pm 0.037$ | 0.047<br>$\pm 0.016$  |
| Subject28 | $\kappa$ | <b>0.137</b><br>$\pm 0.087$ | 0.111<br>$\pm 0.068$        | 0.119<br>$\pm 0.032$ | 0.154<br>$\pm 0.044$        | 0.063<br>$\pm 0.017$ | 0.066<br>$\pm 0.029$ | 0.061<br>$\pm 0.033$ | 0.087<br>$\pm 0.027$ | 0.034<br>$\pm 0.012$ | 0.029<br>$\pm 0.012$ | 0.003<br>$\pm 0.020$ | 0.022<br>$\pm 0.022$ | 0.073<br>$\pm 0.038$ | 0.067<br>$\pm 0.026$        | -0.002<br>$\pm 0.008$ | 0.070<br>$\pm 0.030$ | 0.020<br>$\pm 0.014$  |
|           | AUC      | <b>0.782</b><br>$\pm 0.062$ | 0.763<br>$\pm 0.041$        | 0.752<br>$\pm 0.041$ | 0.788<br>$\pm 0.047$        | 0.691<br>$\pm 0.029$ | 0.609<br>$\pm 0.046$ | 0.693<br>$\pm 0.034$ | 0.690<br>$\pm 0.040$ | 0.636<br>$\pm 0.010$ | 0.580<br>$\pm 0.037$ | 0.508<br>$\pm 0.031$ | 0.588<br>$\pm 0.033$ | 0.735<br>$\pm 0.036$ | 0.647<br>$\pm 0.017$        | 0.532<br>$\pm 0.037$  | 0.632<br>$\pm 0.031$ | 0.621<br>$\pm 0.021$  |
|           | BAcc     | <b>0.159</b><br>$\pm 0.085$ | 0.133<br>$\pm 0.066$        | 0.141<br>$\pm 0.032$ | 0.175<br>$\pm 0.043$        | 0.087<br>$\pm 0.017$ | 0.090<br>$\pm 0.028$ | 0.085<br>$\pm 0.032$ | 0.110<br>$\pm 0.026$ | 0.059<br>$\pm 0.011$ | 0.053<br>$\pm 0.012$ | 0.028<br>$\pm 0.020$ | 0.046<br>$\pm 0.021$ | 0.096<br>$\pm 0.037$ | 0.090<br>$\pm 0.025$        | 0.023<br>$\pm 0.008$  | 0.093<br>$\pm 0.029$ | 0.045<br>$\pm 0.013$  |
|           | Acc.1    | <b>0.159</b><br>$\pm 0.085$ | 0.133<br>$\pm 0.066$        | 0.140<br>$\pm 0.032$ | 0.174<br>$\pm 0.043$        | 0.087<br>$\pm 0.017$ | 0.090<br>$\pm 0.028$ | 0.084<br>$\pm 0.032$ | 0.109<br>$\pm 0.027$ | 0.058<br>$\pm 0.011$ | 0.054<br>$\pm 0.012$ | 0.029<br>$\pm 0.020$ | 0.046<br>$\pm 0.021$ | 0.096<br>$\pm 0.037$ | 0.090<br>$\pm 0.024$        | 0.022<br>$\pm 0.008$  | 0.093<br>$\pm 0.029$ | 0.044<br>$\pm 0.013$  |
|           | Acc.2    | <b>0.261</b><br>$\pm 0.123$ | 0.214<br>$\pm 0.085$        | 0.233<br>$\pm 0.043$ | 0.275<br>$\pm 0.065$        | 0.152<br>$\pm 0.021$ | 0.160<br>$\pm 0.042$ | 0.167<br>$\pm 0.044$ | 0.183<br>$\pm 0.034$ | 0.106<br>$\pm 0.011$ | 0.094<br>$\pm 0.016$ | 0.055<br>$\pm 0.017$ | 0.083<br>$\pm 0.024$ | 0.181<br>$\pm 0.041$ | 0.150<br>$\pm 0.023$        | 0.054<br>$\pm 0.008$  | 0.157<br>$\pm 0.058$ | 0.086<br>$\pm 0.025$  |
| Subject29 | $\kappa$ | 0.021<br>$\pm 0.010$        | <b>0.042</b><br>$\pm 0.020$ | 0.022<br>$\pm 0.020$ | 0.031<br>$\pm 0.019$        | 0.031<br>$\pm 0.017$ | 0.019<br>$\pm 0.015$ | 0.014<br>$\pm 0.015$ | 0.026<br>$\pm 0.014$ | 0.016<br>$\pm 0.011$ | 0.031<br>$\pm 0.017$ | 0.039<br>$\pm 0.017$ | 0.029<br>$\pm 0.017$ | 0.051<br>$\pm 0.010$ | 0.022<br>$\pm 0.019$        | 0.003<br>$\pm 0.009$  | 0.026<br>$\pm 0.009$ | 0.011<br>$\pm 0.011$  |
|           | AUC      | 0.632<br>$\pm 0.027$        | <b>0.648</b><br>$\pm 0.045$ | 0.604<br>$\pm 0.028$ | 0.617<br>$\pm 0.021$        | 0.622<br>$\pm 0.019$ | 0.549<br>$\pm 0.018$ | 0.535<br>$\pm 0.023$ | 0.580<br>$\pm 0.016$ | 0.588<br>$\pm 0.023$ | 0.597<br>$\pm 0.034$ | 0.636<br>$\pm 0.031$ | 0.587<br>$\pm 0.027$ | 0.672<br>$\pm 0.019$ | 0.560<br>$\pm 0.032$        | 0.516<br>$\pm 0.020$  | 0.549<br>$\pm 0.022$ | 0.560<br>$\pm 0.027$  |
|           | BAcc     | 0.046<br>$\pm 0.010$        | <b>0.066</b><br>$\pm 0.020$ | 0.046<br>$\pm 0.020$ | 0.055<br>$\pm 0.019$        | 0.055<br>$\pm 0.017$ | 0.043<br>$\pm 0.015$ | 0.038<br>$\pm 0.014$ | 0.050<br>$\pm 0.014$ | 0.041<br>$\pm 0.011$ | 0.055<br>$\pm 0.017$ | 0.063<br>$\pm 0.017$ | 0.053<br>$\pm 0.017$ | 0.075<br>$\pm 0.010$ | 0.046<br>$\pm 0.018$        | 0.028<br>$\pm 0.009$  | 0.050<br>$\pm 0.009$ | 0.035<br>$\pm 0.011$  |
|           | Acc.1    | 0.046<br>$\pm 0.010$        | <b>0.066</b><br>$\pm 0.020$ | 0.046<br>$\pm 0.020$ | 0.056<br>$\pm 0.018$        | 0.055<br>$\pm 0.017$ | 0.045<br>$\pm 0.014$ | 0.038<br>$\pm 0.014$ | 0.050<br>$\pm 0.014$ | 0.041<br>$\pm 0.011$ | 0.057<br>$\pm 0.016$ | 0.064<br>$\pm 0.017$ | 0.054<br>$\pm 0.017$ | 0.075<br>$\pm 0.010$ | 0.047<br>$\pm 0.018$        | 0.028<br>$\pm 0.009$  | 0.054<br>$\pm 0.011$ | 0.036<br>$\pm 0.011$  |
|           | Acc.2    | 0.074<br>$\pm 0.023$        | <b>0.116</b><br>$\pm 0.026$ | 0.084<br>$\pm 0.027$ | 0.099<br>$\pm 0.026$        | 0.096<br>$\pm 0.019$ | 0.100<br>$\pm 0.015$ | 0.074<br>$\pm 0.024$ | 0.093<br>$\pm 0.025$ | 0.077<br>$\pm 0.013$ | 0.110<br>$\pm 0.030$ | 0.115<br>$\pm 0.021$ | 0.097<br>$\pm 0.027$ | 0.130<br>$\pm 0.013$ | 0.093<br>$\pm 0.029$        | 0.051<br>$\pm 0.011$  | 0.103<br>$\pm 0.018$ | 0.065<br>$\pm 0.020$  |
| Subject3  | $\kappa$ | 0.361<br>$\pm 0.311$        | 0.503<br>$\pm 0.105$        | 0.407<br>$\pm 0.048$ | 0.615<br>$\pm 0.031$        | 0.404<br>$\pm 0.049$ | 0.560<br>$\pm 0.095$ | 0.463<br>$\pm 0.063$ | 0.601<br>$\pm 0.047$ | 0.040<br>$\pm 0.014$ | 0.045<br>$\pm 0.018$ | 0.056<br>$\pm 0.015$ | 0.296<br>$\pm 0.064$ | 0.362<br>$\pm 0.036$ | <b>0.607</b><br>$\pm 0.049$ | 0.006<br>$\pm 0.007$  | 0.455<br>$\pm 0.073$ | 0.008<br>$\pm 0.016$  |

Continued on next page

| Subject   | Metric   | DeepConvnet  | EEGNet       | Conformer   | CTNet       | SSVEPDNN    | BIOT <sup>(i)</sup> | BIOT <sup>(i)</sup> | BENDR <sup>(i)</sup> | BENDR <sup>(i)</sup> | CBraMod <sup>(i)</sup> | CBraMod <sup>(i)</sup> | EEGPT <sup>(i)</sup> | EEGPT <sup>(i)</sup> | LaBraM <sup>(i)</sup> | LaBraM <sup>(i)</sup> | STEEGformer-s <sup>(i)</sup> | STEEGformer-s <sup>(i)</sup> |
|-----------|----------|--------------|--------------|-------------|-------------|-------------|---------------------|---------------------|----------------------|----------------------|------------------------|------------------------|----------------------|----------------------|-----------------------|-----------------------|------------------------------|------------------------------|
|           | AUC      | 0.883        | 0.970        | 0.950       | 0.987       | 0.942       | 0.934               | <b>0.974</b>        | 0.967                | 0.683                | 0.635                  | 0.690                  | 0.864                | 0.949                | 0.953                 | 0.551                 | 0.899                        | 0.605                        |
|           |          | $\pm 0.142$  | $\pm 0.023$  | $\pm 0.019$ | $\pm 0.007$ | $\pm 0.019$ | $\pm 0.031$         | $\pm 0.012$         | $\pm 0.016$          | $\pm 0.021$          | $\pm 0.032$            | $\pm 0.025$            | $\pm 0.026$          | $\pm 0.011$          | $\pm 0.017$           | $\pm 0.029$           | $\pm 0.015$                  | $\pm 0.037$                  |
|           | BAcc     | 0.377        | 0.516        | 0.421       | 0.625       | 0.419       | 0.571               | 0.477               | 0.611                | 0.064                | 0.069                  | 0.080                  | 0.313                | 0.378                | <b>0.617</b>          | 0.031                 | 0.469                        | 0.033                        |
|           |          | $\pm 0.303$  | $\pm 0.102$  | $\pm 0.047$ | $\pm 0.030$ | $\pm 0.047$ | $\pm 0.093$         | $\pm 0.062$         | $\pm 0.046$          | $\pm 0.014$          | $\pm 0.017$            | $\pm 0.014$            | $\pm 0.062$          | $\pm 0.035$          | $\pm 0.048$           | $\pm 0.007$           | $\pm 0.071$                  | $\pm 0.016$                  |
|           | Acc.1    | 0.377        | 0.516        | 0.421       | 0.627       | 0.419       | 0.569               | 0.477               | 0.611                | 0.065                | 0.069                  | 0.082                  | 0.313                | 0.381                | <b>0.617</b>          | 0.031                 | 0.473                        | 0.033                        |
|           |          | $\pm 0.303$  | $\pm 0.102$  | $\pm 0.047$ | $\pm 0.032$ | $\pm 0.047$ | $\pm 0.091$         | $\pm 0.063$         | $\pm 0.046$          | $\pm 0.015$          | $\pm 0.016$            | $\pm 0.016$            | $\pm 0.063$          | $\pm 0.032$          | $\pm 0.049$           | $\pm 0.008$           | $\pm 0.072$                  | $\pm 0.015$                  |
|           | Acc.2    | 0.521        | 0.724        | 0.591       | 0.834       | 0.592       | 0.768               | 0.758               | <b>0.777</b>         | 0.116                | 0.124                  | 0.142                  | 0.437                | 0.569                | 0.772                 | 0.060                 | 0.626                        | 0.071                        |
|           |          | $\pm 0.387$  | $\pm 0.103$  | $\pm 0.062$ | $\pm 0.056$ | $\pm 0.057$ | $\pm 0.087$         | $\pm 0.081$         | $\pm 0.040$          | $\pm 0.017$          | $\pm 0.026$            | $\pm 0.027$            | $\pm 0.076$          | $\pm 0.036$          | $\pm 0.060$           | $\pm 0.006$           | $\pm 0.063$                  | $\pm 0.024$                  |
|           | $\kappa$ | 0.141        | 0.137        | 0.118       | 0.187       | 0.113       | 0.124               | 0.106               | 0.118                | 0.041                | 0.050                  | 0.047                  | 0.057                | 0.104                | <b>0.146</b>          | 0.004                 | 0.089                        | 0.016                        |
|           |          | $\pm 0.055$  | $\pm 0.034$  | $\pm 0.040$ | $\pm 0.042$ | $\pm 0.032$ | $\pm 0.015$         | $\pm 0.019$         | $\pm 0.014$          | $\pm 0.009$          | $\pm 0.025$            | $\pm 0.017$            | $\pm 0.009$          | $\pm 0.016$          | $\pm 0.029$           | $\pm 0.008$           | $\pm 0.033$                  | $\pm 0.014$                  |
| Subject30 | AUC      | 0.805        | <b>0.823</b> | 0.772       | 0.831       | 0.772       | 0.687               | 0.752               | 0.740                | 0.673                | 0.634                  | 0.696                  | 0.649                | 0.793                | 0.740                 | 0.525                 | 0.649                        | 0.592                        |
|           |          | $\pm 0.041$  | $\pm 0.035$  | $\pm 0.029$ | $\pm 0.036$ | $\pm 0.029$ | $\pm 0.018$         | $\pm 0.017$         | $\pm 0.016$          | $\pm 0.020$          | $\pm 0.023$            | $\pm 0.037$            | $\pm 0.024$          | $\pm 0.024$          | $\pm 0.044$           | $\pm 0.016$           | $\pm 0.040$                  | $\pm 0.046$                  |
|           | BAcc     | 0.163        | 0.158        | 0.140       | 0.208       | 0.135       | 0.146               | 0.129               | 0.140                | 0.065                | 0.074                  | 0.070                  | 0.081                | 0.126                | <b>0.168</b>          | 0.029                 | 0.112                        | 0.041                        |
|           |          | $\pm 0.054$  | $\pm 0.033$  | $\pm 0.039$ | $\pm 0.041$ | $\pm 0.032$ | $\pm 0.015$         | $\pm 0.018$         | $\pm 0.014$          | $\pm 0.009$          | $\pm 0.024$            | $\pm 0.017$            | $\pm 0.009$          | $\pm 0.016$          | $\pm 0.028$           | $\pm 0.008$           | $\pm 0.033$                  | $\pm 0.013$                  |
|           | Acc.1    | 0.163        | 0.158        | 0.140       | 0.208       | 0.135       | 0.147               | 0.128               | 0.141                | 0.065                | 0.074                  | 0.073                  | 0.081                | 0.126                | <b>0.167</b>          | 0.028                 | 0.113                        | 0.040                        |
|           |          | $\pm 0.054$  | $\pm 0.033$  | $\pm 0.039$ | $\pm 0.041$ | $\pm 0.032$ | $\pm 0.015$         | $\pm 0.018$         | $\pm 0.013$          | $\pm 0.009$          | $\pm 0.024$            | $\pm 0.017$            | $\pm 0.008$          | $\pm 0.016$          | $\pm 0.028$           | $\pm 0.008$           | $\pm 0.032$                  | $\pm 0.013$                  |
| Subject31 | Acc.2    | <b>0.281</b> | 0.267        | 0.241       | 0.314       | 0.218       | 0.245               | 0.216               | 0.234                | 0.127                | 0.137                  | 0.142                  | 0.137                | 0.234                | 0.264                 | 0.053                 | 0.187                        | 0.073                        |
|           |          | $\pm 0.059$  | $\pm 0.031$  | $\pm 0.055$ | $\pm 0.048$ | $\pm 0.038$ | $\pm 0.025$         | $\pm 0.024$         | $\pm 0.026$          | $\pm 0.013$          | $\pm 0.031$            | $\pm 0.017$            | $\pm 0.009$          | $\pm 0.023$          | $\pm 0.050$           | $\pm 0.010$           | $\pm 0.048$                  | $\pm 0.022$                  |
|           | $\kappa$ | <b>0.211</b> | 0.196        | 0.156       | 0.221       | 0.090       | 0.069               | 0.094               | 0.138                | 0.029                | 0.029                  | 0.003                  | 0.074                | 0.140                | 0.130                 | 0.004                 | 0.106                        | 0.013                        |
|           |          | $\pm 0.097$  | $\pm 0.043$  | $\pm 0.052$ | $\pm 0.016$ | $\pm 0.039$ | $\pm 0.017$         | $\pm 0.027$         | $\pm 0.022$          | $\pm 0.005$          | $\pm 0.022$            | $\pm 0.010$            | $\pm 0.021$          | $\pm 0.044$          | $\pm 0.031$           | $\pm 0.009$           | $\pm 0.015$                  | $\pm 0.011$                  |
|           | AUC      | 0.842        | <b>0.845</b> | 0.787       | 0.862       | 0.775       | 0.618               | 0.726               | 0.750                | 0.653                | 0.601                  | 0.489                  | 0.651                | 0.807                | 0.714                 | 0.520                 | 0.671                        | 0.614                        |
|           |          | $\pm 0.052$  | $\pm 0.039$  | $\pm 0.037$ | $\pm 0.029$ | $\pm 0.029$ | $\pm 0.029$         | $\pm 0.033$         | $\pm 0.020$          | $\pm 0.016$          | $\pm 0.047$            | $\pm 0.028$            | $\pm 0.023$          | $\pm 0.036$          | $\pm 0.034$           | $\pm 0.019$           | $\pm 0.034$                  | $\pm 0.054$                  |
| Subject32 | BAcc     | <b>0.230</b> | 0.216        | 0.177       | 0.240       | 0.113       | 0.093               | 0.117               | 0.159                | 0.054                | 0.054                  | 0.028                  | 0.097                | 0.161                | 0.151                 | 0.029                 | 0.128                        | 0.037                        |
|           |          | $\pm 0.095$  | $\pm 0.042$  | $\pm 0.050$ | $\pm 0.016$ | $\pm 0.038$ | $\pm 0.017$         | $\pm 0.027$         | $\pm 0.022$          | $\pm 0.005$          | $\pm 0.021$            | $\pm 0.009$            | $\pm 0.020$          | $\pm 0.043$          | $\pm 0.030$           | $\pm 0.009$           | $\pm 0.015$                  | $\pm 0.011$                  |
|           | Acc.1    | <b>0.230</b> | 0.216        | 0.179       | 0.240       | 0.113       | 0.093               | 0.117               | 0.160                | 0.054                | 0.054                  | 0.028                  | 0.097                | 0.162                | 0.152                 | 0.028                 | 0.132                        | 0.037                        |
|           |          | $\pm 0.095$  | $\pm 0.042$  | $\pm 0.049$ | $\pm 0.016$ | $\pm 0.038$ | $\pm 0.017$         | $\pm 0.027$         | $\pm 0.023$          | $\pm 0.005$          | $\pm 0.022$            | $\pm 0.009$            | $\pm 0.021$          | $\pm 0.042$          | $\pm 0.031$           | $\pm 0.010$           | $\pm 0.015$                  | $\pm 0.010$                  |
|           | Acc.2    | 0.350        | <b>0.354</b> | 0.273       | 0.390       | 0.200       | 0.156               | 0.199               | 0.257                | 0.108                | 0.101                  | 0.041                  | 0.158                | 0.271                | 0.232                 | 0.058                 | 0.217                        | 0.073                        |
|           |          | $\pm 0.117$  | $\pm 0.049$  | $\pm 0.053$ | $\pm 0.031$ | $\pm 0.051$ | $\pm 0.027$         | $\pm 0.047$         | $\pm 0.039$          | $\pm 0.011$          | $\pm 0.031$            | $\pm 0.009$            | $\pm 0.022$          | $\pm 0.058$          | $\pm 0.035$           | $\pm 0.007$           | $\pm 0.035$                  | $\pm 0.010$                  |
| Subject32 | $\kappa$ | 0.169        | 0.426        | 0.306       | 0.544       | 0.295       | <b>0.480</b>        | 0.407               | 0.432                | 0.021                | 0.030                  | 0.015                  | 0.152                | 0.306                | 0.414                 | 0.013                 | 0.312                        | 0.008                        |
|           |          | $\pm 0.197$  | $\pm 0.044$  | $\pm 0.016$ | $\pm 0.054$ | $\pm 0.047$ | $\pm 0.068$         | $\pm 0.031$         | $\pm 0.031$          | $\pm 0.011$          | $\pm 0.023$            | $\pm 0.013$            | $\pm 0.024$          | $\pm 0.038$          | $\pm 0.048$           | $\pm 0.011$           | $\pm 0.031$                  | $\pm 0.015$                  |
|           | AUC      | 0.819        | 0.964        | 0.926       | 0.983       | 0.909       | 0.930               | <b>0.974</b>        | 0.931                | 0.648                | 0.589                  | 0.589                  | 0.751                | 0.896                | 0.893                 | 0.565                 | 0.847                        | 0.613                        |
|           |          | $\pm 0.140$  | $\pm 0.008$  | $\pm 0.008$ | $\pm 0.004$ | $\pm 0.043$ | $\pm 0.023$         | $\pm 0.004$         | $\pm 0.009$          | $\pm 0.013$          | $\pm 0.041$            | $\pm 0.013$            | $\pm 0.023$          | $\pm 0.008$          | $\pm 0.021$           | $\pm 0.012$           | $\pm 0.018$                  | $\pm 0.050$                  |

Continued on next page

| Subject   | Metric   | DeepConvnet | EEGNet       | Conformer   | CTNet        | SSVEPDNN    | BIOT <sup>(f)</sup> | BIOT <sup>(l)</sup> | BENDR <sup>(f)</sup> | BENDR <sup>(l)</sup> | CBraMod <sup>(f)</sup> | CBraMod <sup>(l)</sup> | EEGPT <sup>(f)</sup> | EEGPT <sup>(l)</sup> | LaBraM <sup>(f)</sup> | LaBraM <sup>(l)</sup> | STEEGformer-s <sup>(f)</sup> | STEEGformer-s <sup>(l)</sup> |
|-----------|----------|-------------|--------------|-------------|--------------|-------------|---------------------|---------------------|----------------------|----------------------|------------------------|------------------------|----------------------|----------------------|-----------------------|-----------------------|------------------------------|------------------------------|
| Subject33 | BAcc     | 0.190       | 0.440        | 0.323       | 0.555        | 0.313       | <b>0.493</b>        | 0.422               | 0.446                | 0.046                | 0.054                  | 0.040                  | 0.173                | 0.324                | 0.428                 | 0.038                 | 0.329                        | 0.033                        |
|           |          | $\pm 0.192$ | $\pm 0.043$  | $\pm 0.016$ | $\pm 0.053$  | $\pm 0.046$ | $\pm 0.067$         | $\pm 0.031$         | $\pm 0.030$          | $\pm 0.011$          | $\pm 0.022$            | $\pm 0.012$            | $\pm 0.023$          | $\pm 0.037$          | $\pm 0.047$           | $\pm 0.011$           | $\pm 0.030$                  | $\pm 0.015$                  |
|           | Acc.1    | 0.190       | 0.440        | 0.322       | 0.552        | 0.313       | <b>0.494</b>        | 0.421               | 0.443                | 0.046                | 0.054                  | 0.040                  | 0.172                | 0.322                | 0.427                 | 0.039                 | 0.324                        | 0.034                        |
|           |          | $\pm 0.192$ | $\pm 0.043$  | $\pm 0.016$ | $\pm 0.053$  | $\pm 0.046$ | $\pm 0.065$         | $\pm 0.031$         | $\pm 0.029$          | $\pm 0.011$          | $\pm 0.024$            | $\pm 0.013$            | $\pm 0.024$          | $\pm 0.037$          | $\pm 0.049$           | $\pm 0.011$           | $\pm 0.030$                  | $\pm 0.015$                  |
|           | Acc.2    | 0.302       | 0.655        | 0.492       | <b>0.758</b> | 0.470       | 0.762               | 0.710               | 0.624                | 0.094                | 0.106                  | 0.083                  | 0.267                | 0.471                | 0.586                 | 0.070                 | 0.476                        | 0.069                        |
|           |          | $\pm 0.278$ | $\pm 0.043$  | $\pm 0.013$ | $\pm 0.037$  | $\pm 0.079$ | $\pm 0.061$         | $\pm 0.022$         | $\pm 0.028$          | $\pm 0.007$          | $\pm 0.033$            | $\pm 0.009$            | $\pm 0.038$          | $\pm 0.036$          | $\pm 0.052$           | $\pm 0.010$           | $\pm 0.032$                  | $\pm 0.014$                  |
|           | $\kappa$ | 0.157       | <b>0.327</b> | 0.125       | 0.345        | 0.184       | 0.178               | 0.157               | 0.248                | 0.036                | 0.062                  | 0.020                  | 0.049                | 0.138                | 0.215                 | 0.003                 | 0.243                        | 0.011                        |
|           |          | $\pm 0.166$ | $\pm 0.035$  | $\pm 0.040$ | $\pm 0.047$  | $\pm 0.027$ | $\pm 0.043$         | $\pm 0.019$         | $\pm 0.030$          | $\pm 0.019$          | $\pm 0.016$            | $\pm 0.016$            | $\pm 0.013$          | $\pm 0.016$          | $\pm 0.036$           | $\pm 0.008$           | $\pm 0.057$                  | $\pm 0.011$                  |
| Subject34 | AUC      | 0.779       | <b>0.905</b> | 0.813       | 0.926        | 0.808       | 0.732               | 0.840               | 0.831                | 0.670                | 0.594                  | 0.613                  | 0.629                | 0.805                | 0.831                 | 0.543                 | 0.759                        | 0.659                        |
|           |          | $\pm 0.114$ | $\pm 0.009$  | $\pm 0.030$ | $\pm 0.011$  | $\pm 0.034$ | $\pm 0.014$         | $\pm 0.019$         | $\pm 0.027$          | $\pm 0.028$          | $\pm 0.021$            | $\pm 0.040$            | $\pm 0.034$          | $\pm 0.010$          | $\pm 0.008$           | $\pm 0.004$           | $\pm 0.028$                  | $\pm 0.014$                  |
|           | BAcc     | 0.178       | <b>0.344</b> | 0.147       | 0.361        | 0.205       | 0.198               | 0.178               | 0.267                | 0.060                | 0.086                  | 0.045                  | 0.073                | 0.159                | 0.235                 | 0.028                 | 0.262                        | 0.035                        |
|           |          | $\pm 0.162$ | $\pm 0.034$  | $\pm 0.039$ | $\pm 0.045$  | $\pm 0.027$ | $\pm 0.042$         | $\pm 0.019$         | $\pm 0.030$          | $\pm 0.018$          | $\pm 0.015$            | $\pm 0.016$            | $\pm 0.012$          | $\pm 0.016$          | $\pm 0.035$           | $\pm 0.008$           | $\pm 0.056$                  | $\pm 0.011$                  |
|           | Acc.1    | 0.178       | <b>0.344</b> | 0.145       | 0.358        | 0.205       | 0.198               | 0.178               | 0.266                | 0.060                | 0.084                  | 0.044                  | 0.072                | 0.158                | 0.234                 | 0.028                 | 0.260                        | 0.035                        |
|           |          | $\pm 0.162$ | $\pm 0.034$  | $\pm 0.038$ | $\pm 0.045$  | $\pm 0.027$ | $\pm 0.042$         | $\pm 0.018$         | $\pm 0.030$          | $\pm 0.019$          | $\pm 0.015$            | $\pm 0.015$            | $\pm 0.013$          | $\pm 0.017$          | $\pm 0.038$           | $\pm 0.007$           | $\pm 0.054$                  | $\pm 0.011$                  |
|           | Acc.2    | 0.258       | <b>0.505</b> | 0.255       | 0.533        | 0.316       | 0.322               | 0.300               | 0.389                | 0.123                | 0.133                  | 0.069                  | 0.122                | 0.264                | 0.364                 | 0.055                 | 0.373                        | 0.076                        |
|           |          | $\pm 0.225$ | $\pm 0.030$  | $\pm 0.051$ | $\pm 0.045$  | $\pm 0.037$ | $\pm 0.032$         | $\pm 0.029$         | $\pm 0.028$          | $\pm 0.021$          | $\pm 0.016$            | $\pm 0.024$            | $\pm 0.019$          | $\pm 0.025$          | $\pm 0.026$           | $\pm 0.011$           | $\pm 0.054$                  | $\pm 0.007$                  |
| Subject35 | $\kappa$ | 0.199       | <b>0.231</b> | 0.109       | 0.213        | 0.132       | 0.062               | 0.104               | 0.234                | 0.029                | 0.022                  | 0.023                  | 0.074                | 0.212                | 0.169                 | 0.004                 | 0.168                        | 0.006                        |
|           |          | $\pm 0.070$ | $\pm 0.061$  | $\pm 0.018$ | $\pm 0.085$  | $\pm 0.039$ | $\pm 0.022$         | $\pm 0.045$         | $\pm 0.035$          | $\pm 0.009$          | $\pm 0.028$            | $\pm 0.019$            | $\pm 0.012$          | $\pm 0.047$          | $\pm 0.030$           | $\pm 0.011$           | $\pm 0.030$                  | $\pm 0.018$                  |
|           | AUC      | 0.849       | <b>0.850</b> | 0.734       | 0.859        | 0.782       | 0.634               | 0.730               | 0.821                | 0.648                | 0.561                  | 0.603                  | 0.674                | 0.846                | 0.767                 | 0.508                 | 0.743                        | 0.574                        |
|           |          | $\pm 0.044$ | $\pm 0.031$  | $\pm 0.024$ | $\pm 0.030$  | $\pm 0.027$ | $\pm 0.030$         | $\pm 0.055$         | $\pm 0.018$          | $\pm 0.021$          | $\pm 0.043$            | $\pm 0.019$            | $\pm 0.019$          | $\pm 0.035$          | $\pm 0.032$           | $\pm 0.039$           | $\pm 0.037$                  | $\pm 0.025$                  |
|           | BAcc     | 0.219       | <b>0.250</b> | 0.131       | 0.232        | 0.154       | 0.085               | 0.127               | 0.253                | 0.053                | 0.046                  | 0.047                  | 0.097                | 0.231                | 0.190                 | 0.029                 | 0.189                        | 0.031                        |
|           |          | $\pm 0.068$ | $\pm 0.059$  | $\pm 0.017$ | $\pm 0.083$  | $\pm 0.038$ | $\pm 0.021$         | $\pm 0.044$         | $\pm 0.034$          | $\pm 0.008$          | $\pm 0.028$            | $\pm 0.018$            | $\pm 0.011$          | $\pm 0.046$          | $\pm 0.029$           | $\pm 0.011$           | $\pm 0.029$                  | $\pm 0.018$                  |
|           | Acc.1    | 0.219       | <b>0.250</b> | 0.131       | 0.231        | 0.154       | 0.086               | 0.126               | 0.255                | 0.056                | 0.047                  | 0.049                  | 0.097                | 0.233                | 0.190                 | 0.028                 | 0.189                        | 0.030                        |
|           |          | $\pm 0.068$ | $\pm 0.059$  | $\pm 0.017$ | $\pm 0.082$  | $\pm 0.038$ | $\pm 0.021$         | $\pm 0.043$         | $\pm 0.032$          | $\pm 0.008$          | $\pm 0.029$            | $\pm 0.021$            | $\pm 0.011$          | $\pm 0.047$          | $\pm 0.030$           | $\pm 0.011$           | $\pm 0.028$                  | $\pm 0.018$                  |
| Subject35 | Acc.2    | 0.338       | <b>0.374</b> | 0.213       | 0.363        | 0.259       | 0.161               | 0.224               | 0.384                | 0.108                | 0.095                  | 0.085                  | 0.158                | 0.353                | 0.295                 | 0.050                 | 0.303                        | 0.055                        |
|           |          | $\pm 0.097$ | $\pm 0.078$  | $\pm 0.028$ | $\pm 0.109$  | $\pm 0.054$ | $\pm 0.034$         | $\pm 0.063$         | $\pm 0.030$          | $\pm 0.011$          | $\pm 0.042$            | $\pm 0.024$            | $\pm 0.017$          | $\pm 0.054$          | $\pm 0.041$           | $\pm 0.009$           | $\pm 0.045$                  | $\pm 0.016$                  |
|           | $\kappa$ | 0.143       | <b>0.194</b> | 0.125       | 0.221        | 0.141       | 0.164               | 0.147               | 0.154                | 0.034                | 0.037                  | 0.009                  | 0.032                | 0.103                | 0.131                 | 0.006                 | 0.095                        | 0.011                        |
|           |          | $\pm 0.054$ | $\pm 0.037$  | $\pm 0.050$ | $\pm 0.030$  | $\pm 0.027$ | $\pm 0.050$         | $\pm 0.055$         | $\pm 0.037$          | $\pm 0.012$          | $\pm 0.025$            | $\pm 0.007$            | $\pm 0.010$          | $\pm 0.023$          | $\pm 0.042$           | $\pm 0.003$           | $\pm 0.029$                  | $\pm 0.024$                  |
| Subject35 | AUC      | 0.810       | <b>0.834</b> | 0.788       | 0.855        | 0.806       | 0.697               | 0.821               | 0.793                | 0.681                | 0.598                  | 0.596                  | 0.604                | 0.788                | 0.687                 | 0.525                 | 0.672                        | 0.569                        |
|           |          | $\pm 0.030$ | $\pm 0.035$  | $\pm 0.039$ | $\pm 0.032$  | $\pm 0.022$ | $\pm 0.035$         | $\pm 0.039$         | $\pm 0.024$          | $\pm 0.015$          | $\pm 0.016$            | $\pm 0.044$            | $\pm 0.019$          | $\pm 0.027$          | $\pm 0.043$           | $\pm 0.016$           | $\pm 0.024$                  | $\pm 0.033$                  |
|           | BAcc     | 0.164       | <b>0.214</b> | 0.147       | 0.241        | 0.163       | 0.185               | 0.169               | 0.175                | 0.058                | 0.061                  | 0.034                  | 0.056                | 0.126                | 0.152                 | 0.031                 | 0.118                        | 0.036                        |
|           |          | $\pm 0.052$ | $\pm 0.036$  | $\pm 0.049$ | $\pm 0.029$  | $\pm 0.026$ | $\pm 0.048$         | $\pm 0.053$         | $\pm 0.036$          | $\pm 0.011$          | $\pm 0.024$            | $\pm 0.007$            | $\pm 0.010$          | $\pm 0.022$          | $\pm 0.041$           | $\pm 0.003$           | $\pm 0.028$                  | $\pm 0.023$                  |

Continued on next page

| Subject  | Metric   | DeepConvnet          | EEGNet               | Conformer   | CTNet       | SSVEPDNN    | BIOT (f)             | BIOT (l)             | BENDR (f)            | BENDR (l)   | CBraMod (f) | CBraMod (l) | EEGPT (f)   | EEGPT (l)   | LaBraM (f)  | LaBraM (l)  | STEEGformer-s (f) | STEEGformer-s (l) |
|----------|----------|----------------------|----------------------|-------------|-------------|-------------|----------------------|----------------------|----------------------|-------------|-------------|-------------|-------------|-------------|-------------|-------------|-------------------|-------------------|
| Subject1 | Acc.1    | 0.164                | <b>0.214</b>         | 0.147       | 0.242       | 0.163       | 0.183                | 0.167                | 0.175                | 0.059       | 0.060       | 0.035       | 0.057       | 0.126       | 0.151       | 0.031       | 0.117             | 0.036             |
|          |          | $\pm 0.052$          | $\pm \mathbf{0.036}$ | $\pm 0.047$ | $\pm 0.029$ | $\pm 0.026$ | $\pm 0.048$          | $\pm 0.053$          | $\pm 0.034$          | $\pm 0.012$ | $\pm 0.024$ | $\pm 0.008$ | $\pm 0.010$ | $\pm 0.022$ | $\pm 0.039$ | $\pm 0.003$ | $\pm 0.030$       | $\pm 0.023$       |
|          | Acc.2    | 0.268                | <b>0.325</b>         | 0.244       | 0.367       | 0.275       | 0.296                | 0.313                | 0.293                | 0.113       | 0.109       | 0.074       | 0.104       | 0.223       | 0.245       | 0.062       | 0.206             | 0.076             |
|          |          | $\pm 0.084$          | $\pm \mathbf{0.059}$ | $\pm 0.047$ | $\pm 0.055$ | $\pm 0.019$ | $\pm 0.064$          | $\pm 0.056$          | $\pm 0.035$          | $\pm 0.007$ | $\pm 0.024$ | $\pm 0.010$ | $\pm 0.013$ | $\pm 0.025$ | $\pm 0.054$ | $\pm 0.010$ | $\pm 0.039$       | $\pm 0.032$       |
|          | $\kappa$ | <b>0.187</b>         | 0.179                | 0.128       | 0.218       | 0.128       | 0.168                | 0.164                | 0.120                | 0.028       | 0.017       | 0.030       | 0.051       | 0.115       | 0.168       | 0.008       | 0.088             | 0.000             |
|          |          | $\pm \mathbf{0.028}$ | $\pm 0.026$          | $\pm 0.034$ | $\pm 0.044$ | $\pm 0.043$ | $\pm 0.052$          | $\pm 0.028$          | $\pm 0.033$          | $\pm 0.011$ | $\pm 0.012$ | $\pm 0.021$ | $\pm 0.017$ | $\pm 0.021$ | $\pm 0.019$ | $\pm 0.009$ | $\pm 0.028$       | $\pm 0.013$       |
| Subject4 | AUC      | 0.807                | 0.784                | 0.757       | 0.831       | 0.751       | 0.718                | <b>0.811</b>         | 0.700                | 0.606       | 0.556       | 0.627       | 0.628       | 0.749       | 0.716       | 0.527       | 0.623             | 0.551             |
|          |          | $\pm 0.032$          | $\pm 0.033$          | $\pm 0.026$ | $\pm 0.020$ | $\pm 0.031$ | $\pm 0.034$          | $\pm \mathbf{0.037}$ | $\pm 0.040$          | $\pm 0.008$ | $\pm 0.028$ | $\pm 0.020$ | $\pm 0.023$ | $\pm 0.041$ | $\pm 0.013$ | $\pm 0.016$ | $\pm 0.037$       | $\pm 0.026$       |
|          | BAcc     | <b>0.207</b>         | 0.200                | 0.150       | 0.238       | 0.150       | 0.189                | 0.185                | 0.142                | 0.052       | 0.042       | 0.055       | 0.075       | 0.137       | 0.189       | 0.033       | 0.111             | 0.025             |
|          |          | $\pm \mathbf{0.027}$ | $\pm 0.025$          | $\pm 0.033$ | $\pm 0.043$ | $\pm 0.042$ | $\pm 0.051$          | $\pm 0.027$          | $\pm 0.032$          | $\pm 0.011$ | $\pm 0.011$ | $\pm 0.020$ | $\pm 0.017$ | $\pm 0.021$ | $\pm 0.019$ | $\pm 0.008$ | $\pm 0.027$       | $\pm 0.013$       |
|          | Acc.1    | <b>0.207</b>         | 0.199                | 0.150       | 0.239       | 0.150       | 0.188                | 0.183                | 0.143                | 0.052       | 0.042       | 0.055       | 0.075       | 0.139       | 0.188       | 0.034       | 0.112             | 0.025             |
|          |          | $\pm \mathbf{0.027}$ | $\pm 0.025$          | $\pm 0.033$ | $\pm 0.042$ | $\pm 0.042$ | $\pm 0.051$          | $\pm 0.028$          | $\pm 0.033$          | $\pm 0.012$ | $\pm 0.012$ | $\pm 0.020$ | $\pm 0.018$ | $\pm 0.023$ | $\pm 0.018$ | $\pm 0.008$ | $\pm 0.027$       | $\pm 0.013$       |
| Subject5 | Acc.2    | 0.322                | 0.302                | 0.240       | 0.385       | 0.240       | 0.291                | <b>0.337</b>         | 0.229                | 0.094       | 0.074       | 0.095       | 0.122       | 0.231       | 0.277       | 0.056       | 0.183             | 0.056             |
|          |          | $\pm 0.035$          | $\pm 0.036$          | $\pm 0.062$ | $\pm 0.029$ | $\pm 0.050$ | $\pm 0.051$          | $\pm \mathbf{0.052}$ | $\pm 0.032$          | $\pm 0.010$ | $\pm 0.023$ | $\pm 0.017$ | $\pm 0.026$ | $\pm 0.033$ | $\pm 0.025$ | $\pm 0.006$ | $\pm 0.047$       | $\pm 0.017$       |
|          | $\kappa$ | 0.519                | 0.546                | 0.478       | 0.706       | 0.408       | 0.606                | 0.497                | <b>0.620</b>         | 0.048       | 0.089       | 0.044       | 0.313       | 0.403       | 0.601       | 0.013       | 0.447             | 0.039             |
|          |          | $\pm 0.264$          | $\pm 0.077$          | $\pm 0.030$ | $\pm 0.028$ | $\pm 0.101$ | $\pm 0.028$          | $\pm 0.062$          | $\pm \mathbf{0.031}$ | $\pm 0.014$ | $\pm 0.026$ | $\pm 0.025$ | $\pm 0.029$ | $\pm 0.047$ | $\pm 0.050$ | $\pm 0.007$ | $\pm 0.071$       | $\pm 0.018$       |
|          | AUC      | 0.939                | 0.979                | 0.963       | 0.991       | 0.951       | 0.958                | <b>0.982</b>         | 0.972                | 0.718       | 0.652       | 0.706       | 0.874       | 0.965       | 0.962       | 0.558       | 0.915             | 0.619             |
|          |          | $\pm 0.106$          | $\pm 0.009$          | $\pm 0.008$ | $\pm 0.002$ | $\pm 0.021$ | $\pm 0.008$          | $\pm \mathbf{0.004}$ | $\pm 0.005$          | $\pm 0.018$ | $\pm 0.027$ | $\pm 0.022$ | $\pm 0.015$ | $\pm 0.007$ | $\pm 0.008$ | $\pm 0.026$ | $\pm 0.028$       | $\pm 0.024$       |
| Subject6 | BAcc     | 0.531                | 0.557                | 0.491       | 0.714       | 0.423       | 0.615                | 0.510                | <b>0.629</b>         | 0.072       | 0.112       | 0.068       | 0.330       | 0.418       | 0.611       | 0.037       | 0.461             | 0.063             |
|          |          | $\pm 0.257$          | $\pm 0.075$          | $\pm 0.029$ | $\pm 0.027$ | $\pm 0.099$ | $\pm 0.028$          | $\pm 0.061$          | $\pm \mathbf{0.030}$ | $\pm 0.014$ | $\pm 0.025$ | $\pm 0.024$ | $\pm 0.028$ | $\pm 0.046$ | $\pm 0.049$ | $\pm 0.007$ | $\pm 0.069$       | $\pm 0.017$       |
|          | Acc.1    | 0.531                | 0.557                | 0.491       | 0.714       | 0.423       | 0.615                | 0.508                | <b>0.630</b>         | 0.073       | 0.112       | 0.069       | 0.330       | 0.419       | 0.611       | 0.036       | 0.458             | 0.064             |
|          |          | $\pm 0.257$          | $\pm 0.075$          | $\pm 0.029$ | $\pm 0.027$ | $\pm 0.099$ | $\pm 0.026$          | $\pm 0.062$          | $\pm \mathbf{0.033}$ | $\pm 0.015$ | $\pm 0.027$ | $\pm 0.026$ | $\pm 0.030$ | $\pm 0.047$ | $\pm 0.047$ | $\pm 0.006$ | $\pm 0.071$       | $\pm 0.018$       |
|          | Acc.2    | 0.700                | 0.758                | 0.685       | 0.923       | 0.613       | <b>0.842</b>         | 0.816                | 0.806                | 0.132       | 0.172       | 0.137       | 0.459       | 0.606       | 0.803       | 0.067       | 0.656             | 0.113             |
|          |          | $\pm 0.316$          | $\pm 0.092$          | $\pm 0.030$ | $\pm 0.021$ | $\pm 0.113$ | $\pm \mathbf{0.022}$ | $\pm 0.043$          | $\pm 0.026$          | $\pm 0.015$ | $\pm 0.037$ | $\pm 0.042$ | $\pm 0.021$ | $\pm 0.044$ | $\pm 0.054$ | $\pm 0.008$ | $\pm 0.081$       | $\pm 0.026$       |
| Subject6 | $\kappa$ | <b>0.386</b>         | 0.328                | 0.161       | 0.422       | 0.141       | 0.230                | 0.265                | 0.289                | 0.029       | 0.038       | 0.047       | 0.144       | 0.256       | 0.249       | 0.014       | 0.198             | 0.014             |
|          |          | $\pm \mathbf{0.067}$ | $\pm 0.037$          | $\pm 0.025$ | $\pm 0.053$ | $\pm 0.109$ | $\pm 0.014$          | $\pm 0.043$          | $\pm 0.024$          | $\pm 0.008$ | $\pm 0.024$ | $\pm 0.015$ | $\pm 0.020$ | $\pm 0.057$ | $\pm 0.052$ | $\pm 0.011$ | $\pm 0.036$       | $\pm 0.011$       |
|          | AUC      | <b>0.952</b>         | 0.927                | 0.856       | 0.963       | 0.770       | 0.778                | 0.918                | 0.870                | 0.643       | 0.637       | 0.685       | 0.758       | 0.898       | 0.790       | 0.542       | 0.746             | 0.658             |
|          |          | $\pm \mathbf{0.019}$ | $\pm 0.021$          | $\pm 0.006$ | $\pm 0.009$ | $\pm 0.161$ | $\pm 0.018$          | $\pm 0.016$          | $\pm 0.010$          | $\pm 0.029$ | $\pm 0.031$ | $\pm 0.034$ | $\pm 0.017$ | $\pm 0.017$ | $\pm 0.047$ | $\pm 0.006$ | $\pm 0.027$       | $\pm 0.025$       |
|          | BAcc     | <b>0.401</b>         | 0.345                | 0.182       | 0.437       | 0.163       | 0.250                | 0.283                | 0.307                | 0.054       | 0.062       | 0.071       | 0.165       | 0.275       | 0.268       | 0.039       | 0.218             | 0.038             |
|          |          | $\pm \mathbf{0.065}$ | $\pm 0.036$          | $\pm 0.024$ | $\pm 0.051$ | $\pm 0.106$ | $\pm 0.013$          | $\pm 0.042$          | $\pm 0.023$          | $\pm 0.008$ | $\pm 0.023$ | $\pm 0.014$ | $\pm 0.019$ | $\pm 0.055$ | $\pm 0.050$ | $\pm 0.010$ | $\pm 0.035$       | $\pm 0.011$       |
| Subject6 | Acc.1    | <b>0.401</b>         | 0.345                | 0.182       | 0.437       | 0.163       | 0.248                | 0.282                | 0.306                | 0.054       | 0.062       | 0.071       | 0.165       | 0.273       | 0.268       | 0.039       | 0.217             | 0.038             |
|          |          | $\pm \mathbf{0.065}$ | $\pm 0.036$          | $\pm 0.024$ | $\pm 0.051$ | $\pm 0.106$ | $\pm 0.013$          | $\pm 0.042$          | $\pm 0.023$          | $\pm 0.008$ | $\pm 0.024$ | $\pm 0.014$ | $\pm 0.018$ | $\pm 0.055$ | $\pm 0.048$ | $\pm 0.010$ | $\pm 0.036$       | $\pm 0.011$       |

Continued on next page

| Subject  | Metric   | DeepConvnet                 | EEGNet                      | Conformer            | CTNet                | SSVEPDNN             | BIOT (f)             | BIOT (l)             | BENDR (f)            | BENDR (l)            | CBraMod (f)          | CBraMod (l)          | EEGPT (f)            | EEGPT (l)            | LaBraM (f)           | LaBraM (l)           | STEEGformer-s (f)    | STEEGformer-s (l)    |
|----------|----------|-----------------------------|-----------------------------|----------------------|----------------------|----------------------|----------------------|----------------------|----------------------|----------------------|----------------------|----------------------|----------------------|----------------------|----------------------|----------------------|----------------------|----------------------|
|          | Acc.2    | <b>0.584</b><br>$\pm 0.094$ | 0.523<br>$\pm 0.050$        | 0.308<br>$\pm 0.022$ | 0.645<br>$\pm 0.031$ | 0.277<br>$\pm 0.153$ | 0.393<br>$\pm 0.033$ | 0.498<br>$\pm 0.068$ | 0.469<br>$\pm 0.021$ | 0.110<br>$\pm 0.024$ | 0.121<br>$\pm 0.038$ | 0.130<br>$\pm 0.019$ | 0.254<br>$\pm 0.020$ | 0.418<br>$\pm 0.067$ | 0.380<br>$\pm 0.057$ | 0.068<br>$\pm 0.015$ | 0.321<br>$\pm 0.038$ | 0.077<br>$\pm 0.013$ |
| Subject7 | $\kappa$ | 0.193<br>$\pm 0.192$        | <b>0.321</b><br>$\pm 0.039$ | 0.310<br>$\pm 0.046$ | 0.424<br>$\pm 0.085$ | 0.199<br>$\pm 0.047$ | 0.209<br>$\pm 0.077$ | 0.253<br>$\pm 0.040$ | 0.248<br>$\pm 0.013$ | 0.021<br>$\pm 0.009$ | 0.047<br>$\pm 0.028$ | 0.038<br>$\pm 0.023$ | 0.064<br>$\pm 0.034$ | 0.197<br>$\pm 0.047$ | 0.248<br>$\pm 0.064$ | 0.021<br>$\pm 0.008$ | 0.230<br>$\pm 0.041$ | 0.003<br>$\pm 0.009$ |
|          | AUC      | 0.842<br>$\pm 0.094$        | <b>0.904</b><br>$\pm 0.025$ | 0.895<br>$\pm 0.028$ | 0.941<br>$\pm 0.028$ | 0.834<br>$\pm 0.028$ | 0.759<br>$\pm 0.052$ | 0.897<br>$\pm 0.019$ | 0.830<br>$\pm 0.030$ | 0.650<br>$\pm 0.019$ | 0.619<br>$\pm 0.050$ | 0.634<br>$\pm 0.026$ | 0.654<br>$\pm 0.037$ | 0.859<br>$\pm 0.030$ | 0.793<br>$\pm 0.038$ | 0.574<br>$\pm 0.021$ | 0.763<br>$\pm 0.042$ | 0.634<br>$\pm 0.026$ |
|          | BAcc     | 0.214<br>$\pm 0.187$        | <b>0.338</b><br>$\pm 0.038$ | 0.327<br>$\pm 0.045$ | 0.438<br>$\pm 0.083$ | 0.219<br>$\pm 0.046$ | 0.229<br>$\pm 0.075$ | 0.272<br>$\pm 0.039$ | 0.267<br>$\pm 0.013$ | 0.046<br>$\pm 0.009$ | 0.071<br>$\pm 0.028$ | 0.062<br>$\pm 0.022$ | 0.088<br>$\pm 0.033$ | 0.217<br>$\pm 0.046$ | 0.267<br>$\pm 0.062$ | 0.046<br>$\pm 0.007$ | 0.249<br>$\pm 0.040$ | 0.028<br>$\pm 0.008$ |
|          | Acc.1    | 0.214<br>$\pm 0.187$        | <b>0.338</b><br>$\pm 0.038$ | 0.327<br>$\pm 0.045$ | 0.440<br>$\pm 0.083$ | 0.219<br>$\pm 0.046$ | 0.230<br>$\pm 0.075$ | 0.273<br>$\pm 0.040$ | 0.267<br>$\pm 0.013$ | 0.046<br>$\pm 0.009$ | 0.072<br>$\pm 0.030$ | 0.063<br>$\pm 0.022$ | 0.087<br>$\pm 0.032$ | 0.215<br>$\pm 0.045$ | 0.264<br>$\pm 0.060$ | 0.046<br>$\pm 0.008$ | 0.247<br>$\pm 0.039$ | 0.028<br>$\pm 0.009$ |
|          | Acc.2    | 0.316<br>$\pm 0.240$        | <b>0.494</b><br>$\pm 0.055$ | 0.466<br>$\pm 0.054$ | 0.629<br>$\pm 0.107$ | 0.328<br>$\pm 0.059$ | 0.368<br>$\pm 0.094$ | 0.457<br>$\pm 0.046$ | 0.397<br>$\pm 0.039$ | 0.093<br>$\pm 0.017$ | 0.128<br>$\pm 0.040$ | 0.103<br>$\pm 0.038$ | 0.156<br>$\pm 0.042$ | 0.342<br>$\pm 0.054$ | 0.390<br>$\pm 0.063$ | 0.076<br>$\pm 0.011$ | 0.377<br>$\pm 0.057$ | 0.066<br>$\pm 0.021$ |
|          | $\kappa$ | 0.299<br>$\pm 0.063$        | <b>0.331</b><br>$\pm 0.066$ | 0.221<br>$\pm 0.013$ | 0.371<br>$\pm 0.051$ | 0.169<br>$\pm 0.108$ | 0.206<br>$\pm 0.041$ | 0.285<br>$\pm 0.034$ | 0.319<br>$\pm 0.048$ | 0.019<br>$\pm 0.012$ | 0.045<br>$\pm 0.023$ | 0.023<br>$\pm 0.024$ | 0.128<br>$\pm 0.015$ | 0.270<br>$\pm 0.037$ | 0.310<br>$\pm 0.041$ | 0.005<br>$\pm 0.007$ | 0.236<br>$\pm 0.043$ | 0.008<br>$\pm 0.025$ |
|          | AUC      | 0.917<br>$\pm 0.017$        | <b>0.924</b><br>$\pm 0.024$ | 0.855<br>$\pm 0.027$ | 0.941<br>$\pm 0.018$ | 0.772<br>$\pm 0.158$ | 0.765<br>$\pm 0.033$ | 0.908<br>$\pm 0.010$ | 0.883<br>$\pm 0.015$ | 0.638<br>$\pm 0.025$ | 0.588<br>$\pm 0.051$ | 0.634<br>$\pm 0.051$ | 0.746<br>$\pm 0.017$ | 0.880<br>$\pm 0.027$ | 0.849<br>$\pm 0.017$ | 0.545<br>$\pm 0.017$ | 0.792<br>$\pm 0.032$ | 0.587<br>$\pm 0.034$ |
| Subject8 | BAcc     | 0.316<br>$\pm 0.061$        | <b>0.347</b><br>$\pm 0.064$ | 0.240<br>$\pm 0.012$ | 0.387<br>$\pm 0.050$ | 0.190<br>$\pm 0.105$ | 0.225<br>$\pm 0.040$ | 0.303<br>$\pm 0.033$ | 0.336<br>$\pm 0.047$ | 0.043<br>$\pm 0.012$ | 0.069<br>$\pm 0.022$ | 0.047<br>$\pm 0.024$ | 0.150<br>$\pm 0.015$ | 0.288<br>$\pm 0.037$ | 0.327<br>$\pm 0.040$ | 0.030<br>$\pm 0.007$ | 0.255<br>$\pm 0.042$ | 0.033<br>$\pm 0.025$ |
|          | Acc.1    | 0.316<br>$\pm 0.061$        | <b>0.347</b><br>$\pm 0.064$ | 0.240<br>$\pm 0.012$ | 0.392<br>$\pm 0.050$ | 0.190<br>$\pm 0.105$ | 0.225<br>$\pm 0.040$ | 0.300<br>$\pm 0.033$ | 0.337<br>$\pm 0.045$ | 0.044<br>$\pm 0.013$ | 0.070<br>$\pm 0.023$ | 0.049<br>$\pm 0.025$ | 0.150<br>$\pm 0.016$ | 0.290<br>$\pm 0.039$ | 0.329<br>$\pm 0.043$ | 0.029<br>$\pm 0.006$ | 0.258<br>$\pm 0.043$ | 0.033<br>$\pm 0.025$ |
|          | Acc.2    | 0.494<br>$\pm 0.083$        | <b>0.525</b><br>$\pm 0.072$ | 0.370<br>$\pm 0.015$ | 0.606<br>$\pm 0.040$ | 0.283<br>$\pm 0.143$ | 0.386<br>$\pm 0.038$ | 0.496<br>$\pm 0.034$ | 0.508<br>$\pm 0.039$ | 0.089<br>$\pm 0.013$ | 0.130<br>$\pm 0.043$ | 0.088<br>$\pm 0.031$ | 0.246<br>$\pm 0.021$ | 0.432<br>$\pm 0.053$ | 0.472<br>$\pm 0.059$ | 0.066<br>$\pm 0.012$ | 0.415<br>$\pm 0.071$ | 0.063<br>$\pm 0.042$ |
|          | $\kappa$ | <b>0.369</b><br>$\pm 0.056$ | 0.353<br>$\pm 0.045$        | 0.240<br>$\pm 0.044$ | 0.390<br>$\pm 0.040$ | 0.238<br>$\pm 0.053$ | 0.243<br>$\pm 0.041$ | 0.221<br>$\pm 0.027$ | 0.306<br>$\pm 0.030$ | 0.044<br>$\pm 0.012$ | 0.056<br>$\pm 0.027$ | 0.006<br>$\pm 0.011$ | 0.075<br>$\pm 0.012$ | 0.198<br>$\pm 0.022$ | 0.236<br>$\pm 0.017$ | 0.005<br>$\pm 0.003$ | 0.202<br>$\pm 0.015$ | 0.008<br>$\pm 0.012$ |
|          | AUC      | <b>0.927</b><br>$\pm 0.014$ | 0.917<br>$\pm 0.020$        | 0.885<br>$\pm 0.010$ | 0.944<br>$\pm 0.011$ | 0.863<br>$\pm 0.026$ | 0.776<br>$\pm 0.027$ | 0.891<br>$\pm 0.015$ | 0.863<br>$\pm 0.023$ | 0.679<br>$\pm 0.011$ | 0.617<br>$\pm 0.055$ | 0.524<br>$\pm 0.032$ | 0.681<br>$\pm 0.010$ | 0.846<br>$\pm 0.020$ | 0.816<br>$\pm 0.025$ | 0.531<br>$\pm 0.017$ | 0.759<br>$\pm 0.022$ | 0.587<br>$\pm 0.026$ |
| Subject9 | BAcc     | <b>0.385</b><br>$\pm 0.055$ | 0.369<br>$\pm 0.044$        | 0.259<br>$\pm 0.043$ | 0.405<br>$\pm 0.039$ | 0.257<br>$\pm 0.051$ | 0.262<br>$\pm 0.040$ | 0.240<br>$\pm 0.026$ | 0.324<br>$\pm 0.029$ | 0.068<br>$\pm 0.012$ | 0.079<br>$\pm 0.027$ | 0.031<br>$\pm 0.010$ | 0.098<br>$\pm 0.012$ | 0.218<br>$\pm 0.021$ | 0.255<br>$\pm 0.017$ | 0.030<br>$\pm 0.003$ | 0.222<br>$\pm 0.015$ | 0.033<br>$\pm 0.012$ |
|          | Acc.1    | <b>0.385</b><br>$\pm 0.055$ | 0.369<br>$\pm 0.044$        | 0.259<br>$\pm 0.043$ | 0.410<br>$\pm 0.039$ | 0.257<br>$\pm 0.051$ | 0.262<br>$\pm 0.041$ | 0.240<br>$\pm 0.024$ | 0.325<br>$\pm 0.028$ | 0.069<br>$\pm 0.011$ | 0.079<br>$\pm 0.026$ | 0.032<br>$\pm 0.010$ | 0.097<br>$\pm 0.012$ | 0.218<br>$\pm 0.020$ | 0.255<br>$\pm 0.016$ | 0.030<br>$\pm 0.004$ | 0.223<br>$\pm 0.016$ | 0.033<br>$\pm 0.012$ |
|          | Acc.2    | <b>0.531</b><br>$\pm 0.052$ | 0.523<br>$\pm 0.067$        | 0.395<br>$\pm 0.043$ | 0.586<br>$\pm 0.031$ | 0.374<br>$\pm 0.057$ | 0.395<br>$\pm 0.064$ | 0.444<br>$\pm 0.032$ | 0.461<br>$\pm 0.037$ | 0.123<br>$\pm 0.009$ | 0.133<br>$\pm 0.043$ | 0.050<br>$\pm 0.014$ | 0.155<br>$\pm 0.011$ | 0.346<br>$\pm 0.039$ | 0.377<br>$\pm 0.019$ | 0.054<br>$\pm 0.006$ | 0.337<br>$\pm 0.011$ | 0.070<br>$\pm 0.008$ |

9369  
9370  
9371  
9372  
9373  
9374  
9375  
9376  
9377  
9378  
9379  
9380  
9381  
9382  
9383  
9384  
9385  
9386  
9387  
9388  
9389  
9390  
9391  
9392  
9393  
9394  
9395  
9396  
9397  
9398  
9399  
9400  
9401

## Leave-One-Out Fine-Tuning Results

Table 71: Average Leave-One-Out Fine-Tuned Performance Across All Subjects.

| Model (Training strategy) | $\kappa$     | AUC          | BAcc         | Acc.1        | Acc.2        |
|---------------------------|--------------|--------------|--------------|--------------|--------------|
|                           | 0.340        | <b>0.874</b> | 0.356        | 0.356        | 0.487        |
| <b>DeepConvnet</b>        | $\pm 0.183$  | $\pm 0.080$  | $\pm 0.178$  | $\pm 0.178$  | $\pm 0.202$  |
|                           | 0.301        | 0.864        | 0.318        | 0.318        | 0.458        |
| <b>EEGNet</b>             | $\pm 0.175$  | $\pm 0.095$  | $\pm 0.170$  | $\pm 0.170$  | $\pm 0.208$  |
|                           | 0.274        | 0.835        | 0.292        | 0.292        | 0.418        |
| <b>Conformer</b>          | $\pm 0.190$  | $\pm 0.111$  | $\pm 0.185$  | $\pm 0.185$  | $\pm 0.223$  |
|                           | 0.374        | 0.885        | 0.390        | 0.390        | 0.526        |
| <b>CTNet</b>              | $\pm 0.212$  | $\pm 0.096$  | $\pm 0.207$  | $\pm 0.207$  | $\pm 0.232$  |
|                           | 0.212        | 0.787        | 0.232        | 0.232        | 0.335        |
| <b>SSVEPDNN</b>           | $\pm 0.146$  | $\pm 0.100$  | $\pm 0.143$  | $\pm 0.143$  | $\pm 0.173$  |
|                           | 0.294        | 0.800        | 0.312        | 0.312        | 0.440        |
| <b>BIOT (f)</b>           | $\pm 0.203$  | $\pm 0.116$  | $\pm 0.198$  | $\pm 0.198$  | $\pm 0.244$  |
|                           | 0.202        | 0.781        | 0.222        | 0.222        | 0.340        |
| <b>BIOT (l)</b>           | $\pm 0.154$  | $\pm 0.120$  | $\pm 0.150$  | $\pm 0.151$  | $\pm 0.200$  |
|                           | 0.333        | 0.835        | 0.349        | 0.350        | 0.476        |
| <b>BENDR (f)</b>          | $\pm 0.208$  | $\pm 0.122$  | $\pm 0.203$  | $\pm 0.203$  | $\pm 0.238$  |
|                           | 0.023        | 0.589        | 0.047        | 0.047        | 0.088        |
| <b>BENDR (l)</b>          | $\pm 0.011$  | $\pm 0.033$  | $\pm 0.011$  | $\pm 0.011$  | $\pm 0.018$  |
|                           | 0.076        | 0.664        | 0.099        | 0.099        | 0.170        |
| <b>CBraMod (f)</b>        | $\pm 0.032$  | $\pm 0.047$  | $\pm 0.031$  | $\pm 0.031$  | $\pm 0.047$  |
|                           | 0.026        | 0.604        | 0.050        | 0.051        | 0.095        |
| <b>CBraMod (l)</b>        | $\pm 0.019$  | $\pm 0.046$  | $\pm 0.019$  | $\pm 0.019$  | $\pm 0.031$  |
|                           | 0.106        | 0.696        | 0.128        | 0.129        | 0.205        |
| <b>EEGPT (f)</b>          | $\pm 0.096$  | $\pm 0.089$  | $\pm 0.094$  | $\pm 0.094$  | $\pm 0.123$  |
|                           | 0.195        | 0.794        | 0.215        | 0.215        | 0.323        |
| <b>EEGPT (l)</b>          | $\pm 0.154$  | $\pm 0.103$  | $\pm 0.150$  | $\pm 0.150$  | $\pm 0.190$  |
|                           | 0.318        | 0.822        | 0.335        | 0.336        | 0.460        |
| <b>LaBraM (f)</b>         | $\pm 0.185$  | $\pm 0.100$  | $\pm 0.180$  | $\pm 0.180$  | $\pm 0.205$  |
|                           | 0.012        | 0.552        | 0.037        | 0.037        | 0.072        |
| <b>LaBraM (l)</b>         | $\pm 0.009$  | $\pm 0.029$  | $\pm 0.009$  | $\pm 0.009$  | $\pm 0.014$  |
|                           | <b>0.346</b> | 0.817        | <b>0.363</b> | <b>0.363</b> | <b>0.487</b> |
| <b>STEEGformer-s (f)</b>  | $\pm 0.184$  | $\pm 0.103$  | $\pm 0.179$  | $\pm 0.178$  | $\pm 0.206$  |
|                           | 0.022        | 0.603        | 0.047        | 0.047        | 0.089        |
| <b>STEEGformer-s (l)</b>  | $\pm 0.014$  | $\pm 0.046$  | $\pm 0.013$  | $\pm 0.013$  | $\pm 0.022$  |

Table 72: Per-Subject Leave-One-Out Fine-Tuned Performance.

| Subject   | Metric   | DeepConvnet                 | EEGNet                      | Conformer            | CTNet                       | SSVEPDNN             | BIOT (f)             | BIOT (l)             | BENDR (f)            | BENDR (l)            | CBraMod (f)          | CBraMod (l)          | EEGPT (f)            | EEGPT (l)            | LaBraM (f)                  | LaBraM (l)            | STEEGformers-s (f)          | STEEGformers-s (l)   |
|-----------|----------|-----------------------------|-----------------------------|----------------------|-----------------------------|----------------------|----------------------|----------------------|----------------------|----------------------|----------------------|----------------------|----------------------|----------------------|-----------------------------|-----------------------|-----------------------------|----------------------|
| Subject1  | $\kappa$ | <b>0.304</b><br>$\pm 0.181$ | 0.180<br>$\pm 0.045$        | 0.194<br>$\pm 0.019$ | 0.291<br>$\pm 0.059$        | 0.186<br>$\pm 0.032$ | 0.183<br>$\pm 0.062$ | 0.127<br>$\pm 0.027$ | 0.211<br>$\pm 0.040$ | 0.007<br>$\pm 0.004$ | 0.056<br>$\pm 0.015$ | 0.014<br>$\pm 0.016$ | 0.035<br>$\pm 0.022$ | 0.072<br>$\pm 0.026$ | 0.261<br>$\pm 0.084$        | 0.012<br>$\pm 0.004$  | 0.307<br>$\pm 0.035$        | 0.013<br>$\pm 0.016$ |
|           | AUC      | <b>0.861</b><br>$\pm 0.124$ | 0.830<br>$\pm 0.041$        | 0.806<br>$\pm 0.017$ | 0.900<br>$\pm 0.020$        | 0.800<br>$\pm 0.016$ | 0.757<br>$\pm 0.051$ | 0.751<br>$\pm 0.023$ | 0.790<br>$\pm 0.027$ | 0.525<br>$\pm 0.016$ | 0.618<br>$\pm 0.032$ | 0.583<br>$\pm 0.031$ | 0.605<br>$\pm 0.027$ | 0.685<br>$\pm 0.047$ | 0.821<br>$\pm 0.033$        | 0.518<br>$\pm 0.044$  | 0.822<br>$\pm 0.032$        | 0.568<br>$\pm 0.053$ |
|           | BAcc     | <b>0.321</b><br>$\pm 0.176$ | 0.200<br>$\pm 0.043$        | 0.215<br>$\pm 0.019$ | 0.309<br>$\pm 0.057$        | 0.206<br>$\pm 0.031$ | 0.204<br>$\pm 0.060$ | 0.149<br>$\pm 0.026$ | 0.231<br>$\pm 0.039$ | 0.032<br>$\pm 0.004$ | 0.080<br>$\pm 0.014$ | 0.038<br>$\pm 0.016$ | 0.059<br>$\pm 0.022$ | 0.095<br>$\pm 0.026$ | 0.280<br>$\pm 0.082$        | 0.037<br>$\pm 0.004$  | 0.325<br>$\pm 0.034$        | 0.038<br>$\pm 0.015$ |
|           | Acc.1    | <b>0.321</b><br>$\pm 0.176$ | 0.200<br>$\pm 0.043$        | 0.215<br>$\pm 0.019$ | 0.309<br>$\pm 0.057$        | 0.206<br>$\pm 0.031$ | 0.204<br>$\pm 0.059$ | 0.148<br>$\pm 0.025$ | 0.230<br>$\pm 0.038$ | 0.032<br>$\pm 0.004$ | 0.079<br>$\pm 0.013$ | 0.039<br>$\pm 0.016$ | 0.059<br>$\pm 0.022$ | 0.096<br>$\pm 0.025$ | 0.281<br>$\pm 0.081$        | 0.037<br>$\pm 0.004$  | 0.326<br>$\pm 0.037$        | 0.038<br>$\pm 0.015$ |
|           | Acc.2    | <b>0.457</b><br>$\pm 0.234$ | 0.349<br>$\pm 0.063$        | 0.310<br>$\pm 0.043$ | 0.486<br>$\pm 0.059$        | 0.319<br>$\pm 0.038$ | 0.318<br>$\pm 0.073$ | 0.255<br>$\pm 0.025$ | 0.344<br>$\pm 0.048$ | 0.064<br>$\pm 0.013$ | 0.126<br>$\pm 0.021$ | 0.077<br>$\pm 0.026$ | 0.103<br>$\pm 0.028$ | 0.166<br>$\pm 0.034$ | 0.417<br>$\pm 0.083$        | 0.072<br>$\pm 0.018$  | 0.449<br>$\pm 0.044$        | 0.066<br>$\pm 0.021$ |
| Subject10 | $\kappa$ | 0.179<br>$\pm 0.065$        | 0.148<br>$\pm 0.021$        | 0.056<br>$\pm 0.040$ | 0.137<br>$\pm 0.017$        | 0.058<br>$\pm 0.024$ | 0.043<br>$\pm 0.016$ | 0.010<br>$\pm 0.015$ | 0.069<br>$\pm 0.009$ | 0.019<br>$\pm 0.011$ | 0.048<br>$\pm 0.013$ | 0.039<br>$\pm 0.008$ | 0.012<br>$\pm 0.006$ | 0.049<br>$\pm 0.024$ | <b>0.161</b><br>$\pm 0.039$ | 0.017<br>$\pm 0.016$  | 0.123<br>$\pm 0.019$        | 0.008<br>$\pm 0.013$ |
|           | AUC      | 0.844<br>$\pm 0.041$        | 0.787<br>$\pm 0.016$        | 0.688<br>$\pm 0.022$ | <b>0.793</b><br>$\pm 0.011$ | 0.680<br>$\pm 0.025$ | 0.627<br>$\pm 0.017$ | 0.567<br>$\pm 0.027$ | 0.662<br>$\pm 0.026$ | 0.577<br>$\pm 0.008$ | 0.637<br>$\pm 0.018$ | 0.603<br>$\pm 0.036$ | 0.574<br>$\pm 0.016$ | 0.666<br>$\pm 0.022$ | 0.734<br>$\pm 0.025$        | 0.552<br>$\pm 0.021$  | 0.674<br>$\pm 0.028$        | 0.605<br>$\pm 0.044$ |
|           | BAcc     | 0.200<br>$\pm 0.063$        | 0.169<br>$\pm 0.021$        | 0.080<br>$\pm 0.039$ | 0.159<br>$\pm 0.017$        | 0.081<br>$\pm 0.023$ | 0.067<br>$\pm 0.016$ | 0.035<br>$\pm 0.014$ | 0.092<br>$\pm 0.009$ | 0.044<br>$\pm 0.011$ | 0.071<br>$\pm 0.013$ | 0.063<br>$\pm 0.008$ | 0.037<br>$\pm 0.006$ | 0.073<br>$\pm 0.023$ | <b>0.182</b><br>$\pm 0.038$ | 0.041<br>$\pm 0.016$  | 0.145<br>$\pm 0.019$        | 0.033<br>$\pm 0.013$ |
|           | Acc.1    | 0.200<br>$\pm 0.063$        | 0.169<br>$\pm 0.021$        | 0.080<br>$\pm 0.039$ | 0.159<br>$\pm 0.017$        | 0.081<br>$\pm 0.023$ | 0.068<br>$\pm 0.018$ | 0.036<br>$\pm 0.014$ | 0.091<br>$\pm 0.009$ | 0.044<br>$\pm 0.011$ | 0.071<br>$\pm 0.012$ | 0.063<br>$\pm 0.008$ | 0.037<br>$\pm 0.006$ | 0.073<br>$\pm 0.023$ | <b>0.181</b><br>$\pm 0.040$ | 0.042<br>$\pm 0.016$  | 0.147<br>$\pm 0.019$        | 0.034<br>$\pm 0.012$ |
|           | Acc.2    | 0.331<br>$\pm 0.066$        | 0.271<br>$\pm 0.009$        | 0.150<br>$\pm 0.042$ | 0.254<br>$\pm 0.016$        | 0.147<br>$\pm 0.035$ | 0.114<br>$\pm 0.023$ | 0.073<br>$\pm 0.022$ | 0.150<br>$\pm 0.011$ | 0.079<br>$\pm 0.006$ | 0.132<br>$\pm 0.016$ | 0.094<br>$\pm 0.016$ | 0.087<br>$\pm 0.017$ | 0.134<br>$\pm 0.024$ | <b>0.272</b><br>$\pm 0.039$ | 0.080<br>$\pm 0.018$  | 0.222<br>$\pm 0.042$        | 0.068<br>$\pm 0.019$ |
| Subject11 | $\kappa$ | 0.119<br>$\pm 0.037$        | 0.087<br>$\pm 0.014$        | 0.035<br>$\pm 0.009$ | 0.099<br>$\pm 0.033$        | 0.043<br>$\pm 0.033$ | 0.056<br>$\pm 0.016$ | 0.070<br>$\pm 0.018$ | 0.092<br>$\pm 0.020$ | 0.016<br>$\pm 0.011$ | 0.024<br>$\pm 0.022$ | 0.009<br>$\pm 0.011$ | 0.026<br>$\pm 0.010$ | 0.041<br>$\pm 0.014$ | 0.093<br>$\pm 0.023$        | -0.002<br>$\pm 0.015$ | <b>0.114</b><br>$\pm 0.020$ | 0.004<br>$\pm 0.017$ |
|           | AUC      | 0.785<br>$\pm 0.019$        | <b>0.740</b><br>$\pm 0.023$ | 0.635<br>$\pm 0.023$ | 0.737<br>$\pm 0.024$        | 0.634<br>$\pm 0.030$ | 0.624<br>$\pm 0.027$ | 0.658<br>$\pm 0.026$ | 0.691<br>$\pm 0.025$ | 0.545<br>$\pm 0.013$ | 0.580<br>$\pm 0.047$ | 0.551<br>$\pm 0.017$ | 0.578<br>$\pm 0.024$ | 0.605<br>$\pm 0.023$ | 0.676<br>$\pm 0.020$        | 0.518<br>$\pm 0.036$  | 0.669<br>$\pm 0.014$        | 0.531<br>$\pm 0.009$ |
|           | BAcc     | 0.141<br>$\pm 0.036$        | 0.110<br>$\pm 0.014$        | 0.060<br>$\pm 0.009$ | 0.121<br>$\pm 0.032$        | 0.067<br>$\pm 0.032$ | 0.080<br>$\pm 0.015$ | 0.094<br>$\pm 0.018$ | 0.115<br>$\pm 0.019$ | 0.040<br>$\pm 0.011$ | 0.049<br>$\pm 0.021$ | 0.034<br>$\pm 0.011$ | 0.050<br>$\pm 0.010$ | 0.065<br>$\pm 0.014$ | 0.116<br>$\pm 0.023$        | 0.116<br>$\pm 0.014$  | <b>0.136</b><br>$\pm 0.020$ | 0.029<br>$\pm 0.017$ |
|           | Acc.1    | 0.141<br>$\pm 0.036$        | 0.110<br>$\pm 0.014$        | 0.059<br>$\pm 0.008$ | 0.121<br>$\pm 0.034$        | 0.067<br>$\pm 0.032$ | 0.079<br>$\pm 0.016$ | 0.092<br>$\pm 0.017$ | 0.114<br>$\pm 0.019$ | 0.041<br>$\pm 0.011$ | 0.049<br>$\pm 0.023$ | 0.033<br>$\pm 0.010$ | 0.049<br>$\pm 0.010$ | 0.065<br>$\pm 0.014$ | 0.114<br>$\pm 0.022$        | 0.023<br>$\pm 0.014$  | <b>0.134</b><br>$\pm 0.020$ | 0.028<br>$\pm 0.017$ |
|           | Acc.2    | 0.226<br>$\pm 0.042$        | 0.203<br>$\pm 0.026$        | 0.120<br>$\pm 0.010$ | 0.209<br>$\pm 0.052$        | 0.120<br>$\pm 0.037$ | 0.133<br>$\pm 0.020$ | 0.150<br>$\pm 0.022$ | 0.192<br>$\pm 0.028$ | 0.074<br>$\pm 0.009$ | 0.092<br>$\pm 0.029$ | 0.068<br>$\pm 0.019$ | 0.088<br>$\pm 0.015$ | 0.118<br>$\pm 0.027$ | 0.197<br>$\pm 0.028$        | 0.051<br>$\pm 0.016$  | <b>0.219</b><br>$\pm 0.020$ | 0.053<br>$\pm 0.023$ |

Continued on next page

|                        |          | 9489                        |                      |                      |                             |                      |                      |                      |                      |                      |                      |                      |                      |                      |                      |                       |                             |                       |  |
|------------------------|----------|-----------------------------|----------------------|----------------------|-----------------------------|----------------------|----------------------|----------------------|----------------------|----------------------|----------------------|----------------------|----------------------|----------------------|----------------------|-----------------------|-----------------------------|-----------------------|--|
|                        |          | 9490                        |                      |                      |                             |                      |                      |                      |                      |                      |                      |                      |                      |                      |                      |                       |                             |                       |  |
|                        |          | 9491                        |                      |                      |                             |                      |                      |                      |                      |                      |                      |                      |                      |                      |                      |                       |                             |                       |  |
|                        |          | 9492                        |                      |                      |                             |                      |                      |                      |                      |                      |                      |                      |                      |                      |                      |                       |                             |                       |  |
|                        |          | 9493                        |                      |                      |                             |                      |                      |                      |                      |                      |                      |                      |                      |                      |                      |                       |                             |                       |  |
|                        |          | 9494                        |                      |                      |                             |                      |                      |                      |                      |                      |                      |                      |                      |                      |                      |                       |                             |                       |  |
|                        |          | 9495                        |                      |                      |                             |                      |                      |                      |                      |                      |                      |                      |                      |                      |                      |                       |                             |                       |  |
|                        |          | 9496                        |                      |                      |                             |                      |                      |                      |                      |                      |                      |                      |                      |                      |                      |                       |                             |                       |  |
|                        |          | 9497                        |                      |                      |                             |                      |                      |                      |                      |                      |                      |                      |                      |                      |                      |                       |                             |                       |  |
|                        |          | 9498                        |                      |                      |                             |                      |                      |                      |                      |                      |                      |                      |                      |                      |                      |                       |                             |                       |  |
|                        |          | 9499                        |                      |                      |                             |                      |                      |                      |                      |                      |                      |                      |                      |                      |                      |                       |                             |                       |  |
|                        |          | 9500                        |                      |                      |                             |                      |                      |                      |                      |                      |                      |                      |                      |                      |                      |                       |                             |                       |  |
|                        |          | 9501                        |                      |                      |                             |                      |                      |                      |                      |                      |                      |                      |                      |                      |                      |                       |                             |                       |  |
|                        |          | 9502                        |                      |                      |                             |                      |                      |                      |                      |                      |                      |                      |                      |                      |                      |                       |                             |                       |  |
|                        |          | 9503                        |                      |                      |                             |                      |                      |                      |                      |                      |                      |                      |                      |                      |                      |                       |                             |                       |  |
|                        |          | 9504                        |                      |                      |                             |                      |                      |                      |                      |                      |                      |                      |                      |                      |                      |                       |                             |                       |  |
|                        |          | 9505                        |                      |                      |                             |                      |                      |                      |                      |                      |                      |                      |                      |                      |                      |                       |                             |                       |  |
|                        |          | 9506                        |                      |                      |                             |                      |                      |                      |                      |                      |                      |                      |                      |                      |                      |                       |                             |                       |  |
|                        |          | 9507                        |                      |                      |                             |                      |                      |                      |                      |                      |                      |                      |                      |                      |                      |                       |                             |                       |  |
|                        |          | 9508                        |                      |                      |                             |                      |                      |                      |                      |                      |                      |                      |                      |                      |                      |                       |                             |                       |  |
|                        |          | 9509                        |                      |                      |                             |                      |                      |                      |                      |                      |                      |                      |                      |                      |                      |                       |                             |                       |  |
|                        |          | 9510                        |                      |                      |                             |                      |                      |                      |                      |                      |                      |                      |                      |                      |                      |                       |                             |                       |  |
|                        |          | 9511                        |                      |                      |                             |                      |                      |                      |                      |                      |                      |                      |                      |                      |                      |                       |                             |                       |  |
|                        |          | 9512                        |                      |                      |                             |                      |                      |                      |                      |                      |                      |                      |                      |                      |                      |                       |                             |                       |  |
|                        |          | 9513                        |                      |                      |                             |                      |                      |                      |                      |                      |                      |                      |                      |                      |                      |                       |                             |                       |  |
|                        |          | 9514                        |                      |                      |                             |                      |                      |                      |                      |                      |                      |                      |                      |                      |                      |                       |                             |                       |  |
|                        |          | 9515                        |                      |                      |                             |                      |                      |                      |                      |                      |                      |                      |                      |                      |                      |                       |                             |                       |  |
|                        |          | 9516                        |                      |                      |                             |                      |                      |                      |                      |                      |                      |                      |                      |                      |                      |                       |                             |                       |  |
|                        |          | 9517                        |                      |                      |                             |                      |                      |                      |                      |                      |                      |                      |                      |                      |                      |                       |                             |                       |  |
|                        |          | 9518                        |                      |                      |                             |                      |                      |                      |                      |                      |                      |                      |                      |                      |                      |                       |                             |                       |  |
|                        |          | 9519                        |                      |                      |                             |                      |                      |                      |                      |                      |                      |                      |                      |                      |                      |                       |                             |                       |  |
|                        |          | 9520                        |                      |                      |                             |                      |                      |                      |                      |                      |                      |                      |                      |                      |                      |                       |                             |                       |  |
|                        |          | 9521                        |                      |                      |                             |                      |                      |                      |                      |                      |                      |                      |                      |                      |                      |                       |                             |                       |  |
|                        |          |                             |                      |                      |                             |                      |                      |                      |                      |                      |                      |                      |                      |                      |                      |                       |                             |                       |  |
| Subject                | Metric   | DeepConvnet                 | EEGNet               | Conformer            | CTNet                       | SSVEPDNN             | BIOT (f)             | BIOT (f)             | BENDR (f)            | BENDR (f)            | CBraMod (f)          | CBraMod (f)          | EEGPT (f)            | EEGPT (f)            | LaBraM (f)           | LaBraM (f)            | STEEGformer-s (f)           | STEEGformer-s (f)     |  |
| Subject12              | $\kappa$ | 0.127<br>$\pm 0.070$        | 0.052<br>$\pm 0.016$ | 0.021<br>$\pm 0.014$ | <b>0.102</b><br>$\pm 0.038$ | 0.047<br>$\pm 0.024$ | 0.032<br>$\pm 0.015$ | 0.039<br>$\pm 0.020$ | 0.029<br>$\pm 0.008$ | 0.014<br>$\pm 0.007$ | 0.046<br>$\pm 0.019$ | 0.002<br>$\pm 0.009$ | 0.025<br>$\pm 0.021$ | 0.068<br>$\pm 0.011$ | 0.043<br>$\pm 0.004$ | -0.002<br>$\pm 0.009$ | 0.071<br>$\pm 0.024$        | 0.012<br>$\pm 0.009$  |  |
|                        | AUC      | 0.761<br>$\pm 0.105$        | 0.694<br>$\pm 0.026$ | 0.620<br>$\pm 0.029$ | <b>0.756</b><br>$\pm 0.016$ | 0.648<br>$\pm 0.033$ | 0.632<br>$\pm 0.039$ | 0.616<br>$\pm 0.018$ | 0.601<br>$\pm 0.032$ | 0.559<br>$\pm 0.011$ | 0.620<br>$\pm 0.030$ | 0.560<br>$\pm 0.035$ | 0.585<br>$\pm 0.018$ | 0.711<br>$\pm 0.024$ | 0.603<br>$\pm 0.024$ | 0.512<br>$\pm 0.025$  | 0.627<br>$\pm 0.037$        | 0.500<br>$\pm 0.030$  |  |
|                        | BAcc     | 0.149<br>$\pm 0.068$        | 0.076<br>$\pm 0.015$ | 0.045<br>$\pm 0.013$ | <b>0.125</b><br>$\pm 0.037$ | 0.071<br>$\pm 0.023$ | 0.056<br>$\pm 0.014$ | 0.063<br>$\pm 0.019$ | 0.053<br>$\pm 0.008$ | 0.039<br>$\pm 0.007$ | 0.070<br>$\pm 0.018$ | 0.027<br>$\pm 0.009$ | 0.050<br>$\pm 0.020$ | 0.091<br>$\pm 0.010$ | 0.067<br>$\pm 0.004$ | 0.023<br>$\pm 0.009$  | 0.095<br>$\pm 0.023$        | 0.036<br>$\pm 0.009$  |  |
|                        | Acc.1    | 0.150<br>$\pm 0.068$        | 0.075<br>$\pm 0.015$ | 0.045<br>$\pm 0.013$ | <b>0.123</b><br>$\pm 0.036$ | 0.071<br>$\pm 0.023$ | 0.055<br>$\pm 0.014$ | 0.062<br>$\pm 0.019$ | 0.054<br>$\pm 0.007$ | 0.039<br>$\pm 0.007$ | 0.070<br>$\pm 0.020$ | 0.027<br>$\pm 0.009$ | 0.049<br>$\pm 0.021$ | 0.090<br>$\pm 0.010$ | 0.067<br>$\pm 0.004$ | 0.022<br>$\pm 0.008$  | 0.093<br>$\pm 0.024$        | 0.036<br>$\pm 0.009$  |  |
|                        | Acc.2    | 0.245<br>$\pm 0.097$        | 0.148<br>$\pm 0.020$ | 0.088<br>$\pm 0.013$ | <b>0.206</b><br>$\pm 0.036$ | 0.119<br>$\pm 0.037$ | 0.118<br>$\pm 0.014$ | 0.116<br>$\pm 0.019$ | 0.110<br>$\pm 0.013$ | 0.074<br>$\pm 0.007$ | 0.136<br>$\pm 0.029$ | 0.067<br>$\pm 0.019$ | 0.085<br>$\pm 0.029$ | 0.165<br>$\pm 0.011$ | 0.129<br>$\pm 0.008$ | 0.051<br>$\pm 0.013$  | 0.166<br>$\pm 0.022$        | 0.062<br>$\pm 0.021$  |  |
| Subject13              | $\kappa$ | 0.626<br>$\pm 0.083$        | 0.524<br>$\pm 0.062$ | 0.502<br>$\pm 0.099$ | <b>0.583</b><br>$\pm 0.090$ | 0.317<br>$\pm 0.059$ | 0.398<br>$\pm 0.059$ | 0.179<br>$\pm 0.029$ | 0.566<br>$\pm 0.040$ | 0.052<br>$\pm 0.007$ | 0.112<br>$\pm 0.026$ | 0.002<br>$\pm 0.010$ | 0.168<br>$\pm 0.034$ | 0.449<br>$\pm 0.036$ | 0.480<br>$\pm 0.072$ | 0.016<br>$\pm 0.009$  | 0.520<br>$\pm 0.111$        | 0.049<br>$\pm 0.027$  |  |
|                        | AUC      | 0.972<br>$\pm 0.015$        | 0.950<br>$\pm 0.025$ | 0.938<br>$\pm 0.038$ | <b>0.966</b><br>$\pm 0.015$ | 0.870<br>$\pm 0.029$ | 0.870<br>$\pm 0.038$ | 0.834<br>$\pm 0.042$ | 0.950<br>$\pm 0.014$ | 0.664<br>$\pm 0.019$ | 0.713<br>$\pm 0.060$ | 0.561<br>$\pm 0.026$ | 0.789<br>$\pm 0.023$ | 0.931<br>$\pm 0.018$ | 0.926<br>$\pm 0.027$ | 0.554<br>$\pm 0.021$  | 0.902<br>$\pm 0.050$        | 0.670<br>$\pm 0.039$  |  |
|                        | BAcc     | 0.635<br>$\pm 0.081$        | 0.535<br>$\pm 0.061$ | 0.514<br>$\pm 0.096$ | <b>0.594</b><br>$\pm 0.088$ | 0.334<br>$\pm 0.058$ | 0.413<br>$\pm 0.057$ | 0.199<br>$\pm 0.029$ | 0.577<br>$\pm 0.039$ | 0.076<br>$\pm 0.007$ | 0.134<br>$\pm 0.025$ | 0.027<br>$\pm 0.010$ | 0.189<br>$\pm 0.033$ | 0.463<br>$\pm 0.035$ | 0.493<br>$\pm 0.071$ | 0.040<br>$\pm 0.009$  | 0.532<br>$\pm 0.108$        | 0.073<br>$\pm 0.027$  |  |
|                        | Acc.1    | 0.635<br>$\pm 0.081$        | 0.535<br>$\pm 0.061$ | 0.514<br>$\pm 0.096$ | <b>0.594</b><br>$\pm 0.088$ | 0.334<br>$\pm 0.058$ | 0.415<br>$\pm 0.057$ | 0.199<br>$\pm 0.029$ | 0.578<br>$\pm 0.040$ | 0.078<br>$\pm 0.009$ | 0.137<br>$\pm 0.028$ | 0.027<br>$\pm 0.008$ | 0.191<br>$\pm 0.033$ | 0.464<br>$\pm 0.036$ | 0.493<br>$\pm 0.069$ | 0.040<br>$\pm 0.009$  | 0.532<br>$\pm 0.108$        | 0.072<br>$\pm 0.026$  |  |
|                        | Acc.2    | 0.784<br>$\pm 0.080$        | 0.682<br>$\pm 0.062$ | 0.657<br>$\pm 0.097$ | <b>0.746</b><br>$\pm 0.077$ | 0.462<br>$\pm 0.058$ | 0.565<br>$\pm 0.075$ | 0.338<br>$\pm 0.062$ | 0.735<br>$\pm 0.043$ | 0.136<br>$\pm 0.012$ | 0.225<br>$\pm 0.048$ | 0.070<br>$\pm 0.022$ | 0.300<br>$\pm 0.042$ | 0.639<br>$\pm 0.029$ | 0.636<br>$\pm 0.063$ | 0.079<br>$\pm 0.008$  | 0.680<br>$\pm 0.120$        | 0.142<br>$\pm 0.033$  |  |
| Subject14              | $\kappa$ | <b>0.654</b><br>$\pm 0.082$ | 0.493<br>$\pm 0.048$ | 0.495<br>$\pm 0.048$ | 0.565<br>$\pm 0.022$        | 0.298<br>$\pm 0.039$ | 0.468<br>$\pm 0.035$ | 0.327<br>$\pm 0.053$ | 0.582<br>$\pm 0.054$ | 0.036<br>$\pm 0.015$ | 0.118<br>$\pm 0.044$ | 0.041<br>$\pm 0.021$ | 0.189<br>$\pm 0.025$ | 0.328<br>$\pm 0.024$ | 0.578<br>$\pm 0.036$ | 0.015<br>$\pm 0.014$  | 0.658<br>$\pm 0.060$        | 0.028<br>$\pm 0.030$  |  |
|                        | AUC      | 0.982<br>$\pm 0.008$        | 0.958<br>$\pm 0.008$ | 0.963<br>$\pm 0.003$ | <b>0.970</b><br>$\pm 0.006$ | 0.863<br>$\pm 0.022$ | 0.917<br>$\pm 0.012$ | 0.904<br>$\pm 0.031$ | 0.964<br>$\pm 0.010$ | 0.629<br>$\pm 0.015$ | 0.740<br>$\pm 0.038$ | 0.660<br>$\pm 0.037$ | 0.793<br>$\pm 0.017$ | 0.918<br>$\pm 0.004$ | 0.937<br>$\pm 0.008$ | 0.584<br>$\pm 0.021$  | 0.951<br>$\pm 0.013$        | 0.673<br>$\pm 0.022$  |  |
|                        | BAcc     | <b>0.662</b><br>$\pm 0.080$ | 0.506<br>$\pm 0.046$ | 0.507<br>$\pm 0.047$ | 0.575<br>$\pm 0.022$        | 0.315<br>$\pm 0.038$ | 0.481<br>$\pm 0.035$ | 0.344<br>$\pm 0.052$ | 0.592<br>$\pm 0.053$ | 0.060<br>$\pm 0.015$ | 0.140<br>$\pm 0.043$ | 0.065<br>$\pm 0.020$ | 0.210<br>$\pm 0.024$ | 0.345<br>$\pm 0.023$ | 0.589<br>$\pm 0.035$ | 0.040<br>$\pm 0.013$  | 0.666<br>$\pm 0.059$        | 0.052<br>$\pm 0.030$  |  |
|                        | Acc.1    | <b>0.662</b><br>$\pm 0.080$ | 0.506<br>$\pm 0.046$ | 0.507<br>$\pm 0.047$ | 0.577<br>$\pm 0.023$        | 0.316<br>$\pm 0.036$ | 0.478<br>$\pm 0.035$ | 0.343<br>$\pm 0.055$ | 0.594<br>$\pm 0.054$ | 0.061<br>$\pm 0.014$ | 0.138<br>$\pm 0.043$ | 0.067<br>$\pm 0.022$ | 0.210<br>$\pm 0.025$ | 0.342<br>$\pm 0.023$ | 0.590<br>$\pm 0.033$ | 0.039<br>$\pm 0.013$  | 0.668<br>$\pm 0.058$        | 0.052<br>$\pm 0.031$  |  |
|                        | Acc.2    | 0.817<br>$\pm 0.085$        | 0.676<br>$\pm 0.045$ | 0.687<br>$\pm 0.048$ | 0.744<br>$\pm 0.017$        | 0.431<br>$\pm 0.046$ | 0.667<br>$\pm 0.042$ | 0.507<br>$\pm 0.072$ | 0.748<br>$\pm 0.049$ | 0.104<br>$\pm 0.018$ | 0.241<br>$\pm 0.064$ | 0.123<br>$\pm 0.032$ | 0.321<br>$\pm 0.016$ | 0.511<br>$\pm 0.024$ | 0.741<br>$\pm 0.053$ | 0.078<br>$\pm 0.025$  | <b>0.799</b><br>$\pm 0.039$ | 0.112<br>$\pm 0.036$  |  |
| Subject15              | $\kappa$ | <b>0.304</b><br>$\pm 0.073$ | 0.229<br>$\pm 0.060$ | 0.150<br>$\pm 0.059$ | 0.290<br>$\pm 0.086$        | 0.208<br>$\pm 0.062$ | 0.250<br>$\pm 0.070$ | 0.167<br>$\pm 0.052$ | 0.329<br>$\pm 0.113$ | 0.015<br>$\pm 0.010$ | 0.044<br>$\pm 0.019$ | 0.018<br>$\pm 0.013$ | 0.076<br>$\pm 0.016$ | 0.124<br>$\pm 0.039$ | 0.223<br>$\pm 0.088$ | 0.006<br>$\pm 0.008$  | 0.281<br>$\pm 0.125$        | -0.008<br>$\pm 0.009$ |  |
| Continued on next page |          |                             |                      |                      |                             |                      |                      |                      |                      |                      |                      |                      |                      |                      |                      |                       |                             |                       |  |

Continued on next page



| Subject   | Metric   | DeepConvnet                 | EEGNet                      | Conformer            | CTNet                       | SSVEPDNN             | BIOT (f)                    | BIOT (l)             | BENDR (f)                   | BENDR (l)            | CBraMod (f)          | CBraMod (l)          | EEGPT (f)            | EEGPT (l)            | LaBraM (f)           | LaBraM (l)           | STEEGformer-s (f)           | STEEGformer-s (l)    |
|-----------|----------|-----------------------------|-----------------------------|----------------------|-----------------------------|----------------------|-----------------------------|----------------------|-----------------------------|----------------------|----------------------|----------------------|----------------------|----------------------|----------------------|----------------------|-----------------------------|----------------------|
|           | AUC      | <b>0.873</b><br>$\pm 0.031$ | 0.851<br>$\pm 0.042$        | 0.758<br>$\pm 0.055$ | 0.875<br>$\pm 0.043$        | 0.795<br>$\pm 0.070$ | 0.792<br>$\pm 0.053$        | 0.768<br>$\pm 0.078$ | 0.861<br>$\pm 0.071$        | 0.577<br>$\pm 0.012$ | 0.631<br>$\pm 0.033$ | 0.561<br>$\pm 0.050$ | 0.682<br>$\pm 0.023$ | 0.759<br>$\pm 0.038$ | 0.791<br>$\pm 0.070$ | 0.536<br>$\pm 0.044$ | 0.791<br>$\pm 0.074$        | 0.539<br>$\pm 0.023$ |
|           | BACc     | <b>0.321</b><br>$\pm 0.071$ | 0.248<br>$\pm 0.058$        | 0.171<br>$\pm 0.057$ | 0.308<br>$\pm 0.084$        | 0.228<br>$\pm 0.061$ | 0.269<br>$\pm 0.068$        | 0.188<br>$\pm 0.051$ | 0.345<br>$\pm 0.110$        | 0.040<br>$\pm 0.010$ | 0.068<br>$\pm 0.018$ | 0.042<br>$\pm 0.013$ | 0.100<br>$\pm 0.016$ | 0.146<br>$\pm 0.038$ | 0.242<br>$\pm 0.086$ | 0.031<br>$\pm 0.008$ | 0.299<br>$\pm 0.122$        | 0.017<br>$\pm 0.009$ |
|           | Acc.1    | <b>0.321</b><br>$\pm 0.071$ | 0.248<br>$\pm 0.058$        | 0.171<br>$\pm 0.058$ | 0.309<br>$\pm 0.085$        | 0.228<br>$\pm 0.061$ | 0.270<br>$\pm 0.069$        | 0.188<br>$\pm 0.050$ | 0.344<br>$\pm 0.111$        | 0.040<br>$\pm 0.010$ | 0.069<br>$\pm 0.019$ | 0.043<br>$\pm 0.011$ | 0.099<br>$\pm 0.016$ | 0.148<br>$\pm 0.040$ | 0.243<br>$\pm 0.086$ | 0.031<br>$\pm 0.007$ | 0.298<br>$\pm 0.123$        | 0.017<br>$\pm 0.009$ |
|           | Acc.2    | <b>0.460</b><br>$\pm 0.068$ | 0.378<br>$\pm 0.074$        | 0.263<br>$\pm 0.059$ | 0.441<br>$\pm 0.095$        | 0.345<br>$\pm 0.082$ | 0.390<br>$\pm 0.098$        | 0.294<br>$\pm 0.074$ | 0.477<br>$\pm 0.144$        | 0.076<br>$\pm 0.013$ | 0.129<br>$\pm 0.026$ | 0.074<br>$\pm 0.021$ | 0.171<br>$\pm 0.022$ | 0.241<br>$\pm 0.056$ | 0.357<br>$\pm 0.096$ | 0.058<br>$\pm 0.016$ | 0.417<br>$\pm 0.150$        | 0.037<br>$\pm 0.011$ |
|           | $\kappa$ | 0.363<br>$\pm 0.290$        | 0.441<br>$\pm 0.053$        | 0.303<br>$\pm 0.068$ | 0.480<br>$\pm 0.076$        | 0.274<br>$\pm 0.069$ | 0.291<br>$\pm 0.024$        | 0.175<br>$\pm 0.070$ | 0.414<br>$\pm 0.068$        | 0.023<br>$\pm 0.007$ | 0.057<br>$\pm 0.020$ | 0.020<br>$\pm 0.014$ | 0.079<br>$\pm 0.011$ | 0.149<br>$\pm 0.019$ | 0.359<br>$\pm 0.026$ | 0.000<br>$\pm 0.010$ | <b>0.453</b><br>$\pm 0.058$ | 0.028<br>$\pm 0.013$ |
|           | AUC      | 0.851<br>$\pm 0.153$        | <b>0.938</b><br>$\pm 0.029$ | 0.885<br>$\pm 0.025$ | 0.946<br>$\pm 0.033$        | 0.849<br>$\pm 0.043$ | 0.848<br>$\pm 0.016$        | 0.817<br>$\pm 0.034$ | 0.906<br>$\pm 0.026$        | 0.605<br>$\pm 0.014$ | 0.661<br>$\pm 0.021$ | 0.590<br>$\pm 0.032$ | 0.689<br>$\pm 0.028$ | 0.771<br>$\pm 0.012$ | 0.870<br>$\pm 0.012$ | 0.514<br>$\pm 0.026$ | 0.884<br>$\pm 0.022$        | 0.561<br>$\pm 0.034$ |
|           | BACc     | 0.379<br>$\pm 0.283$        | 0.455<br>$\pm 0.052$        | 0.320<br>$\pm 0.067$ | 0.493<br>$\pm 0.074$        | 0.292<br>$\pm 0.067$ | 0.309<br>$\pm 0.023$        | 0.195<br>$\pm 0.068$ | 0.429<br>$\pm 0.066$        | 0.048<br>$\pm 0.007$ | 0.081<br>$\pm 0.019$ | 0.044<br>$\pm 0.014$ | 0.102<br>$\pm 0.011$ | 0.170<br>$\pm 0.018$ | 0.375<br>$\pm 0.025$ | 0.025<br>$\pm 0.010$ | <b>0.467</b><br>$\pm 0.056$ | 0.053<br>$\pm 0.012$ |
|           | Acc.1    | 0.379<br>$\pm 0.283$        | 0.455<br>$\pm 0.052$        | 0.320<br>$\pm 0.067$ | 0.493<br>$\pm 0.074$        | 0.292<br>$\pm 0.067$ | 0.307<br>$\pm 0.024$        | 0.193<br>$\pm 0.068$ | 0.430<br>$\pm 0.067$        | 0.048<br>$\pm 0.006$ | 0.082<br>$\pm 0.019$ | 0.043<br>$\pm 0.014$ | 0.102<br>$\pm 0.011$ | 0.169<br>$\pm 0.019$ | 0.376<br>$\pm 0.025$ | 0.025<br>$\pm 0.010$ | <b>0.465</b><br>$\pm 0.057$ | 0.053<br>$\pm 0.012$ |
| Subject16 | Acc.2    | 0.491<br>$\pm 0.331$        | <b>0.647</b><br>$\pm 0.080$ | 0.463<br>$\pm 0.068$ | 0.660<br>$\pm 0.074$        | 0.430<br>$\pm 0.093$ | 0.483<br>$\pm 0.036$        | 0.333<br>$\pm 0.056$ | 0.585<br>$\pm 0.082$        | 0.093<br>$\pm 0.010$ | 0.154<br>$\pm 0.021$ | 0.091<br>$\pm 0.017$ | 0.177<br>$\pm 0.018$ | 0.255<br>$\pm 0.028$ | 0.519<br>$\pm 0.038$ | 0.054<br>$\pm 0.020$ | 0.618<br>$\pm 0.057$        | 0.090<br>$\pm 0.009$ |
|           | $\kappa$ | 0.413<br>$\pm 0.257$        | 0.399<br>$\pm 0.023$        | 0.410<br>$\pm 0.031$ | 0.525<br>$\pm 0.041$        | 0.337<br>$\pm 0.191$ | 0.440<br>$\pm 0.111$        | 0.324<br>$\pm 0.031$ | <b>0.451</b><br>$\pm 0.059$ | 0.016<br>$\pm 0.004$ | 0.049<br>$\pm 0.024$ | 0.012<br>$\pm 0.008$ | 0.148<br>$\pm 0.025$ | 0.161<br>$\pm 0.047$ | 0.393<br>$\pm 0.035$ | 0.013<br>$\pm 0.005$ | 0.438<br>$\pm 0.064$        | 0.008<br>$\pm 0.019$ |
|           | AUC      | 0.903<br>$\pm 0.118$        | <b>0.942</b><br>$\pm 0.012$ | 0.926<br>$\pm 0.015$ | 0.967<br>$\pm 0.010$        | 0.841<br>$\pm 0.191$ | 0.903<br>$\pm 0.034$        | 0.895<br>$\pm 0.031$ | 0.933<br>$\pm 0.019$        | 0.573<br>$\pm 0.011$ | 0.663<br>$\pm 0.027$ | 0.569<br>$\pm 0.022$ | 0.749<br>$\pm 0.024$ | 0.824<br>$\pm 0.038$ | 0.875<br>$\pm 0.029$ | 0.563<br>$\pm 0.017$ | 0.892<br>$\pm 0.024$        | 0.571<br>$\pm 0.029$ |
|           | BACc     | 0.427<br>$\pm 0.250$        | 0.414<br>$\pm 0.022$        | 0.425<br>$\pm 0.030$ | 0.537<br>$\pm 0.040$        | 0.354<br>$\pm 0.186$ | 0.454<br>$\pm 0.108$        | 0.340<br>$\pm 0.030$ | <b>0.465</b><br>$\pm 0.057$ | 0.040<br>$\pm 0.004$ | 0.073<br>$\pm 0.023$ | 0.037<br>$\pm 0.008$ | 0.169<br>$\pm 0.024$ | 0.182<br>$\pm 0.046$ | 0.408<br>$\pm 0.034$ | 0.037<br>$\pm 0.004$ | 0.452<br>$\pm 0.062$        | 0.033<br>$\pm 0.019$ |
|           | Acc.1    | 0.427<br>$\pm 0.250$        | 0.414<br>$\pm 0.022$        | 0.425<br>$\pm 0.030$ | 0.536<br>$\pm 0.044$        | 0.354<br>$\pm 0.186$ | 0.454<br>$\pm 0.105$        | 0.340<br>$\pm 0.030$ | <b>0.466</b><br>$\pm 0.056$ | 0.041<br>$\pm 0.004$ | 0.075<br>$\pm 0.024$ | 0.037<br>$\pm 0.007$ | 0.168<br>$\pm 0.023$ | 0.182<br>$\pm 0.044$ | 0.408<br>$\pm 0.033$ | 0.037<br>$\pm 0.005$ | 0.451<br>$\pm 0.062$        | 0.032<br>$\pm 0.018$ |
|           | Acc.2    | 0.560<br>$\pm 0.296$        | 0.607<br>$\pm 0.037$        | 0.576<br>$\pm 0.032$ | 0.705<br>$\pm 0.061$        | 0.469<br>$\pm 0.237$ | <b>0.660</b><br>$\pm 0.086$ | 0.495<br>$\pm 0.024$ | 0.641<br>$\pm 0.075$        | 0.089<br>$\pm 0.006$ | 0.141<br>$\pm 0.043$ | 0.077<br>$\pm 0.008$ | 0.253<br>$\pm 0.035$ | 0.302<br>$\pm 0.064$ | 0.557<br>$\pm 0.037$ | 0.069<br>$\pm 0.009$ | 0.611<br>$\pm 0.064$        | 0.064<br>$\pm 0.019$ |
|           | $\kappa$ | <b>0.638</b><br>$\pm 0.047$ | 0.413<br>$\pm 0.069$        | 0.491<br>$\pm 0.022$ | 0.640<br>$\pm 0.034$        | 0.478<br>$\pm 0.081$ | 0.555<br>$\pm 0.070$        | 0.406<br>$\pm 0.063$ | 0.473<br>$\pm 0.044$        | 0.014<br>$\pm 0.009$ | 0.049<br>$\pm 0.024$ | 0.027<br>$\pm 0.021$ | 0.082<br>$\pm 0.016$ | 0.165<br>$\pm 0.035$ | 0.561<br>$\pm 0.045$ | 0.016<br>$\pm 0.007$ | 0.540<br>$\pm 0.069$        | 0.022<br>$\pm 0.009$ |
|           | AUC      | 0.986<br>$\pm 0.004$        | 0.950<br>$\pm 0.015$        | 0.963<br>$\pm 0.005$ | <b>0.983</b><br>$\pm 0.005$ | 0.940<br>$\pm 0.030$ | 0.951<br>$\pm 0.020$        | 0.934<br>$\pm 0.021$ | 0.944<br>$\pm 0.013$        | 0.553<br>$\pm 0.015$ | 0.641<br>$\pm 0.031$ | 0.618<br>$\pm 0.041$ | 0.799<br>$\pm 0.021$ | 0.941<br>$\pm 0.030$ | 0.941<br>$\pm 0.013$ | 0.540<br>$\pm 0.023$ | 0.934<br>$\pm 0.019$        | 0.640<br>$\pm 0.037$ |

Continued on next page

| Subject   | Metric   | DeepConvnet                 | EEGNet               | Conformer            | CTNet                       | SSVEPDNN             | BIOT (f)             | BIOT (l)             | BENDR (f)            | BENDR (l)            | CBraMod (f)          | CBraMod (l)          | EEGPT (f)            | EEGPT (l)            | LaBraM (f)                  | LaBraM (l)           | STEEGformer-s (f)           | STEEGformer-s (l)    |
|-----------|----------|-----------------------------|----------------------|----------------------|-----------------------------|----------------------|----------------------|----------------------|----------------------|----------------------|----------------------|----------------------|----------------------|----------------------|-----------------------------|----------------------|-----------------------------|----------------------|
|           | BAcc     | <b>0.647</b><br>$\pm 0.046$ | 0.428<br>$\pm 0.067$ | 0.504<br>$\pm 0.022$ | 0.649<br>$\pm 0.033$        | 0.491<br>$\pm 0.079$ | 0.566<br>$\pm 0.068$ | 0.421<br>$\pm 0.062$ | 0.486<br>$\pm 0.043$ | 0.038<br>$\pm 0.009$ | 0.073<br>$\pm 0.024$ | 0.051<br>$\pm 0.020$ | 0.105<br>$\pm 0.015$ | 0.185<br>$\pm 0.034$ | 0.572<br>$\pm 0.044$        | 0.040<br>$\pm 0.007$ | 0.551<br>$\pm 0.067$        | 0.047<br>$\pm 0.008$ |
|           | Acc.1    | <b>0.647</b><br>$\pm 0.046$ | 0.428<br>$\pm 0.067$ | 0.504<br>$\pm 0.022$ | 0.649<br>$\pm 0.033$        | 0.491<br>$\pm 0.079$ | 0.564<br>$\pm 0.071$ | 0.420<br>$\pm 0.062$ | 0.484<br>$\pm 0.045$ | 0.039<br>$\pm 0.008$ | 0.073<br>$\pm 0.024$ | 0.055<br>$\pm 0.021$ | 0.104<br>$\pm 0.016$ | 0.186<br>$\pm 0.035$ | 0.575<br>$\pm 0.045$        | 0.041<br>$\pm 0.007$ | 0.551<br>$\pm 0.064$        | 0.047<br>$\pm 0.009$ |
|           | Acc.2    | 0.831<br>$\pm 0.045$        | 0.630<br>$\pm 0.084$ | 0.696<br>$\pm 0.025$ | <b>0.823</b><br>$\pm 0.037$ | 0.646<br>$\pm 0.101$ | 0.820<br>$\pm 0.072$ | 0.628<br>$\pm 0.058$ | 0.666<br>$\pm 0.042$ | 0.070<br>$\pm 0.013$ | 0.128<br>$\pm 0.041$ | 0.104<br>$\pm 0.027$ | 0.178<br>$\pm 0.026$ | 0.295<br>$\pm 0.043$ | 0.731<br>$\pm 0.046$        | 0.071<br>$\pm 0.011$ | 0.700<br>$\pm 0.047$        | 0.097<br>$\pm 0.013$ |
|           | $\kappa$ | 0.285<br>$\pm 0.113$        | 0.200<br>$\pm 0.028$ | 0.180<br>$\pm 0.027$ | 0.334<br>$\pm 0.037$        | 0.108<br>$\pm 0.024$ | 0.250<br>$\pm 0.028$ | 0.113<br>$\pm 0.042$ | 0.234<br>$\pm 0.018$ | 0.018<br>$\pm 0.009$ | 0.100<br>$\pm 0.044$ | 0.013<br>$\pm 0.020$ | 0.065<br>$\pm 0.022$ | 0.072<br>$\pm 0.020$ | 0.209<br>$\pm 0.035$        | 0.017<br>$\pm 0.014$ | <b>0.293</b><br>$\pm 0.020$ | 0.028<br>$\pm 0.018$ |
| Subject19 | AUC      | <b>0.872</b><br>$\pm 0.063$ | 0.845<br>$\pm 0.022$ | 0.817<br>$\pm 0.023$ | 0.899<br>$\pm 0.023$        | 0.756<br>$\pm 0.037$ | 0.809<br>$\pm 0.018$ | 0.730<br>$\pm 0.039$ | 0.821<br>$\pm 0.022$ | 0.592<br>$\pm 0.024$ | 0.715<br>$\pm 0.068$ | 0.623<br>$\pm 0.010$ | 0.657<br>$\pm 0.026$ | 0.731<br>$\pm 0.029$ | 0.781<br>$\pm 0.028$        | 0.540<br>$\pm 0.015$ | 0.821<br>$\pm 0.015$        | 0.641<br>$\pm 0.027$ |
|           | BAcc     | 0.303<br>$\pm 0.110$        | 0.220<br>$\pm 0.027$ | 0.201<br>$\pm 0.027$ | 0.350<br>$\pm 0.036$        | 0.130<br>$\pm 0.023$ | 0.269<br>$\pm 0.027$ | 0.135<br>$\pm 0.041$ | 0.253<br>$\pm 0.018$ | 0.043<br>$\pm 0.008$ | 0.123<br>$\pm 0.043$ | 0.037<br>$\pm 0.019$ | 0.089<br>$\pm 0.022$ | 0.095<br>$\pm 0.019$ | 0.229<br>$\pm 0.034$        | 0.042<br>$\pm 0.013$ | <b>0.311</b><br>$\pm 0.020$ | 0.053<br>$\pm 0.018$ |
|           | Acc.1    | 0.303<br>$\pm 0.110$        | 0.220<br>$\pm 0.027$ | 0.201<br>$\pm 0.027$ | 0.348<br>$\pm 0.038$        | 0.130<br>$\pm 0.023$ | 0.269<br>$\pm 0.025$ | 0.135<br>$\pm 0.042$ | 0.254<br>$\pm 0.017$ | 0.043<br>$\pm 0.009$ | 0.121<br>$\pm 0.042$ | 0.038<br>$\pm 0.020$ | 0.089<br>$\pm 0.022$ | 0.095<br>$\pm 0.020$ | 0.228<br>$\pm 0.033$        | 0.042<br>$\pm 0.013$ | <b>0.309</b><br>$\pm 0.016$ | 0.052<br>$\pm 0.018$ |
|           | Acc.2    | 0.426<br>$\pm 0.137$        | 0.357<br>$\pm 0.033$ | 0.321<br>$\pm 0.016$ | 0.477<br>$\pm 0.041$        | 0.219<br>$\pm 0.031$ | 0.383<br>$\pm 0.035$ | 0.227<br>$\pm 0.063$ | 0.378<br>$\pm 0.039$ | 0.082<br>$\pm 0.011$ | 0.208<br>$\pm 0.060$ | 0.078<br>$\pm 0.020$ | 0.156<br>$\pm 0.039$ | 0.167<br>$\pm 0.027$ | 0.350<br>$\pm 0.042$        | 0.079<br>$\pm 0.015$ | <b>0.442</b><br>$\pm 0.031$ | 0.093<br>$\pm 0.017$ |
| Subject2  | $\kappa$ | 0.131<br>$\pm 0.111$        | 0.101<br>$\pm 0.028$ | 0.106<br>$\pm 0.032$ | 0.173<br>$\pm 0.051$        | 0.077<br>$\pm 0.019$ | 0.129<br>$\pm 0.034$ | 0.097<br>$\pm 0.035$ | 0.074<br>$\pm 0.018$ | 0.005<br>$\pm 0.008$ | 0.051<br>$\pm 0.025$ | 0.021<br>$\pm 0.024$ | 0.028<br>$\pm 0.016$ | 0.046<br>$\pm 0.022$ | 0.146<br>$\pm 0.035$        | 0.012<br>$\pm 0.012$ | <b>0.150</b><br>$\pm 0.032$ | 0.024<br>$\pm 0.014$ |
|           | AUC      | <b>0.786</b><br>$\pm 0.092$ | 0.738<br>$\pm 0.027$ | 0.738<br>$\pm 0.043$ | 0.837<br>$\pm 0.014$        | 0.693<br>$\pm 0.029$ | 0.723<br>$\pm 0.019$ | 0.707<br>$\pm 0.021$ | 0.634<br>$\pm 0.026$ | 0.533<br>$\pm 0.012$ | 0.619<br>$\pm 0.026$ | 0.589<br>$\pm 0.030$ | 0.590<br>$\pm 0.040$ | 0.625<br>$\pm 0.051$ | 0.734<br>$\pm 0.022$        | 0.553<br>$\pm 0.020$ | 0.719<br>$\pm 0.011$        | 0.602<br>$\pm 0.031$ |
|           | BAcc     | 0.153<br>$\pm 0.109$        | 0.124<br>$\pm 0.027$ | 0.128<br>$\pm 0.031$ | 0.194<br>$\pm 0.049$        | 0.100<br>$\pm 0.018$ | 0.151<br>$\pm 0.033$ | 0.119<br>$\pm 0.035$ | 0.097<br>$\pm 0.018$ | 0.030<br>$\pm 0.007$ | 0.075<br>$\pm 0.025$ | 0.045<br>$\pm 0.023$ | 0.052<br>$\pm 0.015$ | 0.070<br>$\pm 0.022$ | 0.168<br>$\pm 0.034$        | 0.037<br>$\pm 0.012$ | <b>0.171</b><br>$\pm 0.031$ | 0.048<br>$\pm 0.014$ |
|           | Acc.1    | 0.153<br>$\pm 0.109$        | 0.124<br>$\pm 0.027$ | 0.128<br>$\pm 0.031$ | 0.195<br>$\pm 0.049$        | 0.100<br>$\pm 0.018$ | 0.152<br>$\pm 0.035$ | 0.118<br>$\pm 0.034$ | 0.097<br>$\pm 0.019$ | 0.030<br>$\pm 0.008$ | 0.077<br>$\pm 0.026$ | 0.046<br>$\pm 0.023$ | 0.053<br>$\pm 0.015$ | 0.069<br>$\pm 0.021$ | 0.169<br>$\pm 0.035$        | 0.038<br>$\pm 0.012$ | <b>0.172</b><br>$\pm 0.032$ | 0.050<br>$\pm 0.013$ |
| Subject20 | Acc.2    | 0.245<br>$\pm 0.121$        | 0.208<br>$\pm 0.035$ | 0.205<br>$\pm 0.041$ | 0.304<br>$\pm 0.057$        | 0.177<br>$\pm 0.030$ | 0.249<br>$\pm 0.033$ | 0.197<br>$\pm 0.048$ | 0.156<br>$\pm 0.025$ | 0.064<br>$\pm 0.008$ | 0.129<br>$\pm 0.026$ | 0.090<br>$\pm 0.031$ | 0.097<br>$\pm 0.016$ | 0.129<br>$\pm 0.022$ | <b>0.268</b><br>$\pm 0.033$ | 0.071<br>$\pm 0.011$ | 0.267<br>$\pm 0.033$        | 0.091<br>$\pm 0.030$ |
|           | $\kappa$ | <b>0.523</b><br>$\pm 0.055$ | 0.371<br>$\pm 0.020$ | 0.337<br>$\pm 0.029$ | 0.428<br>$\pm 0.066$        | 0.282<br>$\pm 0.051$ | 0.415<br>$\pm 0.046$ | 0.262<br>$\pm 0.039$ | 0.417<br>$\pm 0.036$ | 0.033<br>$\pm 0.008$ | 0.112<br>$\pm 0.032$ | 0.067<br>$\pm 0.033$ | 0.139<br>$\pm 0.028$ | 0.289<br>$\pm 0.029$ | 0.515<br>$\pm 0.084$        | 0.003<br>$\pm 0.015$ | 0.531<br>$\pm 0.037$        | 0.027<br>$\pm 0.014$ |
|           | AUC      | 0.954<br>$\pm 0.009$        | 0.920<br>$\pm 0.010$ | 0.892<br>$\pm 0.022$ | <b>0.927</b><br>$\pm 0.012$ | 0.868<br>$\pm 0.027$ | 0.880<br>$\pm 0.014$ | 0.862<br>$\pm 0.018$ | 0.902<br>$\pm 0.013$ | 0.616<br>$\pm 0.019$ | 0.703<br>$\pm 0.029$ | 0.675<br>$\pm 0.035$ | 0.744<br>$\pm 0.039$ | 0.877<br>$\pm 0.007$ | 0.919<br>$\pm 0.032$        | 0.554<br>$\pm 0.040$ | 0.910<br>$\pm 0.026$        | 0.629<br>$\pm 0.043$ |
|           | BAcc     | <b>0.535</b><br>$\pm 0.053$ | 0.386<br>$\pm 0.020$ | 0.353<br>$\pm 0.028$ | 0.443<br>$\pm 0.064$        | 0.300<br>$\pm 0.050$ | 0.430<br>$\pm 0.045$ | 0.281<br>$\pm 0.038$ | 0.431<br>$\pm 0.035$ | 0.057<br>$\pm 0.007$ | 0.134<br>$\pm 0.031$ | 0.090<br>$\pm 0.032$ | 0.160<br>$\pm 0.027$ | 0.307<br>$\pm 0.029$ | 0.527<br>$\pm 0.081$        | 0.028<br>$\pm 0.015$ | 0.543<br>$\pm 0.036$        | 0.051<br>$\pm 0.014$ |

Continued on next page

| Subject   |          | Metric   | DeepConvnet                 | EEGNet                      | Conformer            | CTNet                       | SSVEPDNN             | BIOT (f)                    | BIOT (l)             | BENDR (f)                   | BENDR (l)            | CBraMod (f)          | CBraMod (l)          | EEGPT (f)            | EEGPT (l)                   | LaBraM (f)           | LaBraM (l)           | STEEGformer-s (f)           | STEEGformer-s (l)    |
|-----------|----------|----------|-----------------------------|-----------------------------|----------------------|-----------------------------|----------------------|-----------------------------|----------------------|-----------------------------|----------------------|----------------------|----------------------|----------------------|-----------------------------|----------------------|----------------------|-----------------------------|----------------------|
|           |          | Acc.1    | <b>0.535</b><br>$\pm 0.053$ | 0.386<br>$\pm 0.020$        | 0.352<br>$\pm 0.029$ | 0.440<br>$\pm 0.064$        | 0.300<br>$\pm 0.050$ | 0.433<br>$\pm 0.048$        | 0.283<br>$\pm 0.044$ | 0.432<br>$\pm 0.038$        | 0.057<br>$\pm 0.008$ | 0.135<br>$\pm 0.031$ | 0.089<br>$\pm 0.033$ | 0.161<br>$\pm 0.029$ | 0.306<br>$\pm 0.028$        | 0.531<br>$\pm 0.081$ | 0.029<br>$\pm 0.016$ | 0.545<br>$\pm 0.035$        | 0.050<br>$\pm 0.014$ |
|           |          | Acc.2    | 0.679<br>$\pm 0.043$        | 0.534<br>$\pm 0.018$        | 0.535<br>$\pm 0.033$ | 0.609<br>$\pm 0.057$        | 0.451<br>$\pm 0.064$ | 0.575<br>$\pm 0.059$        | 0.453<br>$\pm 0.048$ | 0.573<br>$\pm 0.046$        | 0.109<br>$\pm 0.016$ | 0.229<br>$\pm 0.029$ | 0.159<br>$\pm 0.047$ | 0.256<br>$\pm 0.047$ | 0.444<br>$\pm 0.033$        | 0.660<br>$\pm 0.083$ | 0.065<br>$\pm 0.022$ | <b>0.669</b><br>$\pm 0.032$ | 0.103<br>$\pm 0.039$ |
| Subject21 | $\kappa$ |          | 0.375<br>$\pm 0.258$        | 0.464<br>$\pm 0.076$        | 0.418<br>$\pm 0.057$ | <b>0.503</b><br>$\pm 0.098$ | 0.297<br>$\pm 0.047$ | 0.344<br>$\pm 0.039$        | 0.261<br>$\pm 0.049$ | 0.488<br>$\pm 0.055$        | 0.032<br>$\pm 0.017$ | 0.098<br>$\pm 0.030$ | 0.010<br>$\pm 0.019$ | 0.124<br>$\pm 0.024$ | 0.348<br>$\pm 0.051$        | 0.430<br>$\pm 0.035$ | 0.028<br>$\pm 0.020$ | 0.541<br>$\pm 0.060$        | 0.042<br>$\pm 0.018$ |
|           |          | AUC      | 0.905<br>$\pm 0.094$        | <b>0.954</b><br>$\pm 0.010$ | 0.931<br>$\pm 0.015$ | 0.954<br>$\pm 0.017$        | 0.894<br>$\pm 0.011$ | 0.869<br>$\pm 0.017$        | 0.851<br>$\pm 0.040$ | 0.935<br>$\pm 0.016$        | 0.601<br>$\pm 0.014$ | 0.713<br>$\pm 0.038$ | 0.602<br>$\pm 0.064$ | 0.741<br>$\pm 0.025$ | 0.920<br>$\pm 0.016$        | 0.918<br>$\pm 0.008$ | 0.618<br>$\pm 0.022$ | 0.916<br>$\pm 0.018$        | 0.637<br>$\pm 0.042$ |
|           | BAcc     |          | 0.390<br>$\pm 0.252$        | 0.477<br>$\pm 0.074$        | 0.432<br>$\pm 0.055$ | <b>0.516</b><br>$\pm 0.096$ | 0.315<br>$\pm 0.046$ | 0.360<br>$\pm 0.038$        | 0.280<br>$\pm 0.048$ | 0.501<br>$\pm 0.054$        | 0.056<br>$\pm 0.017$ | 0.121<br>$\pm 0.029$ | 0.035<br>$\pm 0.019$ | 0.146<br>$\pm 0.023$ | 0.365<br>$\pm 0.050$        | 0.445<br>$\pm 0.034$ | 0.053<br>$\pm 0.020$ | 0.552<br>$\pm 0.058$        | 0.066<br>$\pm 0.018$ |
|           |          | Acc.1    | 0.389<br>$\pm 0.251$        | 0.478<br>$\pm 0.074$        | 0.430<br>$\pm 0.057$ | <b>0.515</b><br>$\pm 0.097$ | 0.315<br>$\pm 0.046$ | 0.357<br>$\pm 0.038$        | 0.276<br>$\pm 0.048$ | 0.501<br>$\pm 0.054$        | 0.056<br>$\pm 0.018$ | 0.120<br>$\pm 0.029$ | 0.034<br>$\pm 0.018$ | 0.146<br>$\pm 0.023$ | 0.363<br>$\pm 0.051$        | 0.444<br>$\pm 0.033$ | 0.053<br>$\pm 0.020$ | 0.549<br>$\pm 0.056$        | 0.065<br>$\pm 0.017$ |
|           | Acc.2    |          | 0.532<br>$\pm 0.286$        | 0.667<br>$\pm 0.051$        | 0.598<br>$\pm 0.065$ | <b>0.680</b><br>$\pm 0.098$ | 0.472<br>$\pm 0.041$ | 0.533<br>$\pm 0.048$        | 0.418<br>$\pm 0.040$ | 0.657<br>$\pm 0.059$        | 0.098<br>$\pm 0.015$ | 0.206<br>$\pm 0.052$ | 0.077<br>$\pm 0.028$ | 0.235<br>$\pm 0.031$ | 0.528<br>$\pm 0.056$        | 0.607<br>$\pm 0.012$ | 0.102<br>$\pm 0.023$ | 0.697<br>$\pm 0.044$        | 0.118<br>$\pm 0.034$ |
|           |          | $\kappa$ | 0.529<br>$\pm 0.257$        | 0.610<br>$\pm 0.056$        | 0.580<br>$\pm 0.057$ | 0.701<br>$\pm 0.041$        | 0.401<br>$\pm 0.024$ | 0.634<br>$\pm 0.044$        | 0.490<br>$\pm 0.041$ | <b>0.638</b><br>$\pm 0.026$ | 0.031<br>$\pm 0.017$ | 0.108<br>$\pm 0.043$ | 0.039<br>$\pm 0.010$ | 0.214<br>$\pm 0.036$ | 0.441<br>$\pm 0.049$        | 0.536<br>$\pm 0.059$ | 0.020<br>$\pm 0.007$ | 0.564<br>$\pm 0.050$        | 0.026<br>$\pm 0.022$ |
|           |          | AUC      | 0.944<br>$\pm 0.064$        | <b>0.978</b><br>$\pm 0.006$ | 0.976<br>$\pm 0.005$ | 0.989<br>$\pm 0.003$        | 0.908<br>$\pm 0.016$ | 0.958<br>$\pm 0.014$        | 0.959<br>$\pm 0.013$ | 0.973<br>$\pm 0.008$        | 0.629<br>$\pm 0.010$ | 0.702<br>$\pm 0.018$ | 0.655<br>$\pm 0.021$ | 0.793<br>$\pm 0.025$ | 0.940<br>$\pm 0.008$        | 0.929<br>$\pm 0.011$ | 0.584<br>$\pm 0.023$ | 0.933<br>$\pm 0.014$        | 0.667<br>$\pm 0.027$ |
| Subject22 | BAcc     |          | 0.540<br>$\pm 0.251$        | 0.620<br>$\pm 0.055$        | 0.590<br>$\pm 0.056$ | 0.708<br>$\pm 0.040$        | 0.416<br>$\pm 0.024$ | 0.644<br>$\pm 0.043$        | 0.503<br>$\pm 0.040$ | <b>0.647</b><br>$\pm 0.026$ | 0.055<br>$\pm 0.017$ | 0.130<br>$\pm 0.042$ | 0.063<br>$\pm 0.010$ | 0.233<br>$\pm 0.035$ | 0.455<br>$\pm 0.048$        | 0.548<br>$\pm 0.058$ | 0.044<br>$\pm 0.007$ | 0.575<br>$\pm 0.049$        | 0.050<br>$\pm 0.022$ |
|           |          | Acc.1    | 0.540<br>$\pm 0.251$        | 0.620<br>$\pm 0.055$        | 0.590<br>$\pm 0.056$ | 0.708<br>$\pm 0.040$        | 0.416<br>$\pm 0.024$ | 0.648<br>$\pm 0.042$        | 0.505<br>$\pm 0.040$ | <b>0.649</b><br>$\pm 0.026$ | 0.057<br>$\pm 0.017$ | 0.131<br>$\pm 0.039$ | 0.065<br>$\pm 0.011$ | 0.234<br>$\pm 0.035$ | 0.456<br>$\pm 0.050$        | 0.551<br>$\pm 0.059$ | 0.045<br>$\pm 0.006$ | 0.575<br>$\pm 0.051$        | 0.050<br>$\pm 0.023$ |
|           | Acc.2    |          | 0.688<br>$\pm 0.245$        | 0.794<br>$\pm 0.052$        | 0.755<br>$\pm 0.042$ | 0.863<br>$\pm 0.017$        | 0.574<br>$\pm 0.026$ | <b>0.839</b><br>$\pm 0.039$ | 0.694<br>$\pm 0.056$ | 0.808<br>$\pm 0.020$        | 0.104<br>$\pm 0.017$ | 0.209<br>$\pm 0.043$ | 0.108<br>$\pm 0.021$ | 0.352<br>$\pm 0.032$ | 0.629<br>$\pm 0.040$        | 0.695<br>$\pm 0.069$ | 0.083<br>$\pm 0.010$ | 0.747<br>$\pm 0.032$        | 0.102<br>$\pm 0.047$ |
|           |          | $\kappa$ | 0.100<br>$\pm 0.028$        | 0.049<br>$\pm 0.022$        | 0.058<br>$\pm 0.030$ | <b>0.079</b><br>$\pm 0.023$ | 0.032<br>$\pm 0.013$ | 0.069<br>$\pm 0.034$        | 0.067<br>$\pm 0.037$ | 0.042<br>$\pm 0.009$        | 0.014<br>$\pm 0.013$ | 0.063<br>$\pm 0.009$ | 0.027<br>$\pm 0.021$ | 0.025<br>$\pm 0.014$ | 0.064<br>$\pm 0.016$        | 0.044<br>$\pm 0.023$ | 0.003<br>$\pm 0.005$ | 0.077<br>$\pm 0.053$        | 0.029<br>$\pm 0.021$ |
|           |          | AUC      | 0.766<br>$\pm 0.023$        | 0.666<br>$\pm 0.042$        | 0.695<br>$\pm 0.023$ | 0.728<br>$\pm 0.044$        | 0.618<br>$\pm 0.030$ | 0.667<br>$\pm 0.030$        | 0.638<br>$\pm 0.042$ | 0.631<br>$\pm 0.026$        | 0.574<br>$\pm 0.012$ | 0.640<br>$\pm 0.040$ | 0.570<br>$\pm 0.029$ | 0.606<br>$\pm 0.017$ | <b>0.728</b><br>$\pm 0.020$ | 0.638<br>$\pm 0.035$ | 0.544<br>$\pm 0.018$ | 0.663<br>$\pm 0.054$        | 0.589<br>$\pm 0.058$ |
| Subject23 | BAcc     |          | 0.122<br>$\pm 0.027$        | 0.073<br>$\pm 0.021$        | 0.081<br>$\pm 0.029$ | <b>0.102</b><br>$\pm 0.023$ | 0.056<br>$\pm 0.013$ | 0.092<br>$\pm 0.033$        | 0.090<br>$\pm 0.036$ | 0.066<br>$\pm 0.008$        | 0.038<br>$\pm 0.013$ | 0.086<br>$\pm 0.009$ | 0.051<br>$\pm 0.020$ | 0.050<br>$\pm 0.013$ | 0.088<br>$\pm 0.015$        | 0.068<br>$\pm 0.022$ | 0.028<br>$\pm 0.004$ | 0.100<br>$\pm 0.052$        | 0.053<br>$\pm 0.021$ |
|           |          | Acc.1    | 0.122<br>$\pm 0.027$        | 0.073<br>$\pm 0.021$        | 0.081<br>$\pm 0.029$ | <b>0.102</b><br>$\pm 0.022$ | 0.056<br>$\pm 0.013$ | 0.091<br>$\pm 0.034$        | 0.090<br>$\pm 0.037$ | 0.066<br>$\pm 0.009$        | 0.039<br>$\pm 0.013$ | 0.085<br>$\pm 0.009$ | 0.052<br>$\pm 0.021$ | 0.049<br>$\pm 0.013$ | 0.087<br>$\pm 0.015$        | 0.068<br>$\pm 0.022$ | 0.029<br>$\pm 0.005$ | 0.099<br>$\pm 0.053$        | 0.052<br>$\pm 0.021$ |

Continued on next page

| Subject   | Metric   | DeepConvnet                    | EEGNet                         | Conformer       | CTNet            | SSVEPDNN        | BIOT (f)                       | BIOT (l)        | BENDR (f)       | BENDR (l)       | CBraMod (f)                    | CBraMod (l)     | EEGPT (f)       | EEGPT (l)        | LaBraM (f)                     | LaBraM (l)      | STEEGformer-s (f)              | STEEGformer-s (l) |
|-----------|----------|--------------------------------|--------------------------------|-----------------|------------------|-----------------|--------------------------------|-----------------|-----------------|-----------------|--------------------------------|-----------------|-----------------|------------------|--------------------------------|-----------------|--------------------------------|-------------------|
| Subject24 | Acc.2    | 0.214<br>± 0.034               | 0.127<br>±0.029                | 0.157<br>±0.051 | 0.175<br>±0.031  | 0.100<br>±0.012 | 0.161<br>±0.047                | 0.142<br>±0.043 | 0.121<br>±0.017 | 0.069<br>±0.006 | 0.150<br>±0.025                | 0.089<br>±0.027 | 0.090<br>±0.019 | 0.164<br>±0.020  | 0.138<br>±0.042                | 0.062<br>±0.008 | <b>0.175</b><br><b>± 0.062</b> | 0.090<br>±0.021   |
|           | $\kappa$ | 0.182<br>±0.093                | 0.156<br>±0.069                | 0.120<br>±0.022 | 0.229<br>±0.024  | 0.089<br>±0.021 | 0.110<br>±0.025                | 0.090<br>±0.012 | 0.077<br>±0.012 | 0.011<br>±0.009 | 0.067<br>±0.027                | 0.040<br>±0.020 | 0.043<br>±0.007 | 0.085<br>±0.028  | <b>0.241</b><br><b>± 0.050</b> | 0.012<br>±0.009 | 0.259<br>± 0.048               | 0.047<br>±0.023   |
|           | AUC      | <b>0.830</b><br><b>± 0.088</b> | 0.807<br>±0.031                | 0.773<br>±0.028 | 0.849<br>± 0.023 | 0.701<br>±0.007 | 0.700<br>±0.019                | 0.705<br>±0.018 | 0.656<br>±0.020 | 0.561<br>±0.018 | 0.662<br>±0.034                | 0.609<br>±0.019 | 0.631<br>±0.022 | 0.748<br>±0.033  | 0.804<br>±0.019                | 0.537<br>±0.017 | 0.788<br>±0.027                | 0.615<br>±0.029   |
|           | BAcc     | 0.202<br>±0.090                | 0.177<br>±0.067                | 0.142<br>±0.021 | 0.248<br>±0.023  | 0.112<br>±0.021 | 0.133<br>±0.024                | 0.112<br>±0.012 | 0.100<br>±0.012 | 0.036<br>±0.009 | 0.090<br>±0.026                | 0.064<br>±0.020 | 0.067<br>±0.007 | 0.108<br>±0.027  | <b>0.260</b><br><b>± 0.049</b> | 0.036<br>±0.009 | 0.277<br>± 0.047               | 0.071<br>±0.023   |
|           | Acc.1    | 0.202<br>±0.090                | 0.177<br>±0.067                | 0.142<br>±0.021 | 0.248<br>±0.023  | 0.112<br>±0.021 | 0.134<br>±0.027                | 0.111<br>±0.012 | 0.101<br>±0.013 | 0.036<br>±0.008 | 0.094<br>±0.027                | 0.067<br>±0.020 | 0.068<br>±0.006 | 0.111<br>±0.030  | <b>0.262</b><br><b>± 0.049</b> | 0.037<br>±0.009 | 0.278<br>± 0.050               | 0.070<br>±0.022   |
|           | Acc.2    | 0.317<br>±0.124                | 0.272<br>±0.082                | 0.250<br>±0.029 | 0.378<br>±0.034  | 0.185<br>±0.022 | 0.219<br>±0.024                | 0.191<br>±0.005 | 0.170<br>±0.020 | 0.072<br>±0.014 | 0.164<br>±0.030                | 0.115<br>±0.020 | 0.118<br>±0.012 | 0.197<br>±0.038  | <b>0.394</b><br><b>± 0.062</b> | 0.066<br>±0.010 | 0.402<br>± 0.052               | 0.113<br>±0.030   |
|           | $\kappa$ | 0.134<br>±0.049                | 0.124<br>±0.024                | 0.060<br>±0.032 | 0.103<br>±0.021  | 0.155<br>±0.017 | 0.123<br>±0.030                | 0.066<br>±0.016 | 0.158<br>±0.023 | 0.036<br>±0.013 | 0.156<br>±0.020                | 0.075<br>±0.012 | 0.055<br>±0.011 | 0.127<br>±0.042  | <b>0.171</b><br><b>± 0.013</b> | 0.030<br>±0.013 | 0.216<br>± 0.017               | 0.044<br>±0.020   |
|           | AUC      | 0.791<br>±0.039                | <b>0.806</b><br><b>± 0.016</b> | 0.741<br>±0.015 | 0.753<br>±0.021  | 0.774<br>±0.030 | 0.705<br>±0.021                | 0.682<br>±0.025 | 0.745<br>±0.015 | 0.648<br>±0.016 | 0.767<br>±0.029                | 0.729<br>±0.020 | 0.667<br>±0.018 | 0.807<br>± 0.049 | 0.756<br>±0.023                | 0.615<br>±0.055 | 0.779<br>±0.013                | 0.673<br>±0.039   |
| Subject25 | BAcc     | 0.155<br>±0.048                | 0.146<br>±0.023                | 0.084<br>±0.031 | 0.125<br>±0.021  | 0.176<br>±0.017 | 0.145<br>±0.029                | 0.089<br>±0.016 | 0.179<br>±0.022 | 0.060<br>±0.012 | 0.177<br>±0.019                | 0.098<br>±0.012 | 0.079<br>±0.011 | 0.149<br>±0.041  | <b>0.191</b><br><b>± 0.013</b> | 0.054<br>±0.013 | 0.236<br>± 0.017               | 0.068<br>±0.020   |
|           | Acc.1    | 0.155<br>±0.048                | 0.146<br>±0.023                | 0.084<br>±0.031 | 0.127<br>±0.019  | 0.176<br>±0.017 | 0.146<br>±0.027                | 0.088<br>±0.015 | 0.181<br>±0.020 | 0.061<br>±0.013 | 0.178<br>±0.016                | 0.099<br>±0.016 | 0.081<br>±0.012 | 0.153<br>±0.043  | <b>0.194</b><br><b>± 0.014</b> | 0.054<br>±0.012 | 0.236<br>± 0.019               | 0.067<br>±0.019   |
|           | Acc.2    | 0.261<br>±0.052                | 0.245<br>±0.026                | 0.179<br>±0.043 | 0.222<br>±0.028  | 0.273<br>±0.027 | 0.226<br>±0.034                | 0.162<br>±0.023 | 0.271<br>±0.029 | 0.116<br>±0.017 | <b>0.297</b><br><b>± 0.049</b> | 0.189<br>±0.021 | 0.139<br>±0.019 | 0.247<br>±0.060  | 0.294<br>±0.016                | 0.111<br>±0.027 | 0.353<br>± 0.016               | 0.119<br>±0.022   |
|           | $\kappa$ | <b>0.446</b><br><b>± 0.205</b> | 0.308<br>±0.085                | 0.321<br>±0.060 | 0.479<br>± 0.064 | 0.276<br>±0.027 | 0.433<br>±0.039                | 0.285<br>±0.048 | 0.373<br>±0.041 | 0.024<br>±0.012 | 0.057<br>±0.018                | 0.031<br>±0.021 | 0.045<br>±0.025 | 0.140<br>±0.017  | 0.263<br>±0.031                | 0.012<br>±0.012 | 0.357<br>±0.035                | 0.005<br>±0.015   |
|           | AUC      | <b>0.928</b><br><b>± 0.097</b> | 0.904<br>±0.041                | 0.916<br>±0.015 | 0.953<br>± 0.012 | 0.880<br>±0.010 | 0.896<br>±0.017                | 0.875<br>±0.024 | 0.898<br>±0.012 | 0.601<br>±0.016 | 0.658<br>±0.031                | 0.669<br>±0.035 | 0.652<br>±0.019 | 0.779<br>±0.017  | 0.826<br>±0.025                | 0.539<br>±0.026 | 0.854<br>±0.012                | 0.580<br>±0.047   |
|           | BAcc     | <b>0.460</b><br><b>± 0.200</b> | 0.325<br>±0.083                | 0.338<br>±0.059 | 0.492<br>± 0.062 | 0.294<br>±0.026 | 0.447<br>±0.038                | 0.303<br>±0.046 | 0.388<br>±0.040 | 0.048<br>±0.011 | 0.081<br>±0.018                | 0.056<br>±0.020 | 0.069<br>±0.024 | 0.162<br>±0.016  | 0.282<br>±0.030                | 0.037<br>±0.011 | 0.373<br>±0.034                | 0.030<br>±0.014   |
|           | Acc.1    | <b>0.460</b><br><b>± 0.200</b> | 0.325<br>±0.083                | 0.338<br>±0.059 | 0.492<br>± 0.062 | 0.294<br>±0.026 | 0.445<br>±0.035                | 0.302<br>±0.049 | 0.386<br>±0.040 | 0.048<br>±0.012 | 0.081<br>±0.017                | 0.056<br>±0.020 | 0.069<br>±0.025 | 0.160<br>±0.016  | 0.282<br>±0.029                | 0.037<br>±0.011 | 0.372<br>±0.036                | 0.029<br>±0.015   |
|           | Acc.2    | 0.617<br>±0.242                | 0.482<br>±0.093                | 0.506<br>±0.066 | 0.644<br>± 0.058 | 0.435<br>±0.007 | <b>0.624</b><br><b>± 0.039</b> | 0.471<br>±0.075 | 0.541<br>±0.039 | 0.091<br>±0.023 | 0.153<br>±0.031                | 0.109<br>±0.034 | 0.131<br>±0.023 | 0.262<br>±0.027  | 0.426<br>±0.057                | 0.072<br>±0.021 | 0.513<br>±0.042                | 0.065<br>±0.020   |

Continued on next page

| Subject                | Metric    | DeepConvnet                 | EEGNet                      | Conformer                   | CTNet                       | SSVEPDNN             | BIOT (f)             | BIOT (l)             | BENDR (f)            | BENDR (l)                   | CBraMod (f)          | CBraMod (l)          | EEGPT (f)            | EEGPT (l)            | LaBraM (f)                  | LaBraM (l)                  | STEEGformers (f)            | STEEGformers (l)     |
|------------------------|-----------|-----------------------------|-----------------------------|-----------------------------|-----------------------------|----------------------|----------------------|----------------------|----------------------|-----------------------------|----------------------|----------------------|----------------------|----------------------|-----------------------------|-----------------------------|-----------------------------|----------------------|
| Subject27              | $\kappa$  | 0.380<br>$\pm 0.053$        | 0.229<br>$\pm 0.044$        | 0.142<br>$\pm 0.025$        | <b>0.279</b><br>$\pm 0.012$ | 0.040<br>$\pm 0.026$ | 0.126<br>$\pm 0.036$ | 0.076<br>$\pm 0.022$ | 0.185<br>$\pm 0.047$ | 0.015<br>$\pm 0.011$        | 0.041<br>$\pm 0.024$ | 0.027<br>$\pm 0.013$ | 0.032<br>$\pm 0.014$ | 0.092<br>$\pm 0.043$ | 0.171<br>$\pm 0.046$        | 0.012<br>$\pm 0.015$        | 0.188<br>$\pm 0.029$        | 0.004<br>$\pm 0.007$ |
|                        | AUC       | 0.916<br>$\pm 0.016$        | 0.853<br>$\pm 0.021$        | 0.756<br>$\pm 0.024$        | <b>0.864</b><br>$\pm 0.015$ | 0.660<br>$\pm 0.046$ | 0.712<br>$\pm 0.028$ | 0.696<br>$\pm 0.029$ | 0.787<br>$\pm 0.032$ | 0.573<br>$\pm 0.023$        | 0.615<br>$\pm 0.027$ | 0.581<br>$\pm 0.029$ | 0.632<br>$\pm 0.016$ | 0.736<br>$\pm 0.019$ | 0.749<br>$\pm 0.024$        | 0.528<br>$\pm 0.021$        | 0.726<br>$\pm 0.024$        | 0.551<br>$\pm 0.035$ |
|                        | BAcc      | 0.396<br>$\pm 0.051$        | 0.249<br>$\pm 0.043$        | 0.164<br>$\pm 0.024$        | <b>0.297</b><br>$\pm 0.012$ | 0.064<br>$\pm 0.025$ | 0.148<br>$\pm 0.035$ | 0.099<br>$\pm 0.022$ | 0.206<br>$\pm 0.046$ | 0.040<br>$\pm 0.011$        | 0.065<br>$\pm 0.023$ | 0.052<br>$\pm 0.013$ | 0.056<br>$\pm 0.014$ | 0.115<br>$\pm 0.042$ | 0.192<br>$\pm 0.045$        | 0.036<br>$\pm 0.014$        | 0.208<br>$\pm 0.029$        | 0.029<br>$\pm 0.007$ |
|                        | Acc.1     | 0.396<br>$\pm 0.051$        | 0.249<br>$\pm 0.043$        | 0.164<br>$\pm 0.024$        | <b>0.297</b><br>$\pm 0.011$ | 0.064<br>$\pm 0.025$ | 0.147<br>$\pm 0.035$ | 0.098<br>$\pm 0.022$ | 0.207<br>$\pm 0.046$ | 0.040<br>$\pm 0.011$        | 0.065<br>$\pm 0.023$ | 0.051<br>$\pm 0.013$ | 0.057<br>$\pm 0.014$ | 0.114<br>$\pm 0.043$ | 0.191<br>$\pm 0.045$        | 0.037<br>$\pm 0.015$        | 0.206<br>$\pm 0.029$        | 0.028<br>$\pm 0.007$ |
|                        | Acc.2     | 0.555<br>$\pm 0.042$        | 0.387<br>$\pm 0.031$        | 0.269<br>$\pm 0.022$        | <b>0.437</b><br>$\pm 0.019$ | 0.121<br>$\pm 0.027$ | 0.225<br>$\pm 0.044$ | 0.171<br>$\pm 0.020$ | 0.321<br>$\pm 0.054$ | 0.078<br>$\pm 0.018$        | 0.123<br>$\pm 0.032$ | 0.093<br>$\pm 0.014$ | 0.104<br>$\pm 0.013$ | 0.186<br>$\pm 0.046$ | 0.298<br>$\pm 0.039$        | 0.070<br>$\pm 0.016$        | 0.308<br>$\pm 0.030$        | 0.059<br>$\pm 0.008$ |
|                        | Subject28 | $\kappa$                    | 0.112<br>$\pm 0.034$        | <b>0.116</b><br>$\pm 0.045$ | 0.067<br>$\pm 0.017$        | 0.107<br>$\pm 0.035$ | 0.049<br>$\pm 0.015$ | 0.096<br>$\pm 0.051$ | 0.047<br>$\pm 0.025$ | 0.097<br>$\pm 0.025$        | 0.027<br>$\pm 0.009$ | 0.074<br>$\pm 0.026$ | 0.014<br>$\pm 0.018$ | 0.028<br>$\pm 0.010$ | 0.021<br>$\pm 0.008$        | 0.118<br>$\pm 0.038$        | 0.021<br>$\pm 0.015$        | 0.106<br>$\pm 0.063$ |
| AUC                    |           | 0.782<br>$\pm 0.056$        | <b>0.771</b><br>$\pm 0.028$ | 0.729<br>$\pm 0.032$        | 0.757<br>$\pm 0.038$        | 0.679<br>$\pm 0.041$ | 0.671<br>$\pm 0.045$ | 0.622<br>$\pm 0.051$ | 0.706<br>$\pm 0.001$ | 0.578<br>$\pm 0.019$        | 0.643<br>$\pm 0.025$ | 0.590<br>$\pm 0.032$ | 0.608<br>$\pm 0.030$ | 0.661<br>$\pm 0.027$ | 0.712<br>$\pm 0.036$        | 0.588<br>$\pm 0.052$        | 0.667<br>$\pm 0.051$        | 0.636<br>$\pm 0.035$ |
| BAcc                   |           | 0.134<br>$\pm 0.033$        | <b>0.138</b><br>$\pm 0.044$ | 0.090<br>$\pm 0.016$        | 0.129<br>$\pm 0.034$        | 0.073<br>$\pm 0.015$ | 0.118<br>$\pm 0.050$ | 0.071<br>$\pm 0.025$ | 0.119<br>$\pm 0.024$ | 0.051<br>$\pm 0.008$        | 0.097<br>$\pm 0.025$ | 0.038<br>$\pm 0.017$ | 0.053<br>$\pm 0.010$ | 0.045<br>$\pm 0.008$ | 0.140<br>$\pm 0.037$        | 0.045<br>$\pm 0.014$        | 0.128<br>$\pm 0.061$        | 0.027<br>$\pm 0.017$ |
| Acc.1                  |           | 0.134<br>$\pm 0.033$        | <b>0.138</b><br>$\pm 0.044$ | 0.090<br>$\pm 0.017$        | 0.128<br>$\pm 0.033$        | 0.073<br>$\pm 0.015$ | 0.121<br>$\pm 0.051$ | 0.071<br>$\pm 0.024$ | 0.120<br>$\pm 0.025$ | 0.051<br>$\pm 0.008$        | 0.100<br>$\pm 0.023$ | 0.040<br>$\pm 0.019$ | 0.052<br>$\pm 0.010$ | 0.044<br>$\pm 0.008$ | 0.144<br>$\pm 0.041$        | 0.047<br>$\pm 0.014$        | 0.129<br>$\pm 0.062$        | 0.028<br>$\pm 0.018$ |
| Acc.2                  |           | <b>0.229</b><br>$\pm 0.050$ | 0.236<br>$\pm 0.059$        | 0.176<br>$\pm 0.021$        | 0.222<br>$\pm 0.049$        | 0.140<br>$\pm 0.015$ | 0.185<br>$\pm 0.065$ | 0.117<br>$\pm 0.024$ | 0.200<br>$\pm 0.027$ | 0.092<br>$\pm 0.011$        | 0.164<br>$\pm 0.028$ | 0.083<br>$\pm 0.030$ | 0.095<br>$\pm 0.010$ | 0.095<br>$\pm 0.017$ | 0.224<br>$\pm 0.056$        | 0.100<br>$\pm 0.028$        | 0.202<br>$\pm 0.064$        | 0.070<br>$\pm 0.032$ |
| Subject29              |           | $\kappa$                    | 0.046<br>$\pm 0.034$        | 0.037<br>$\pm 0.034$        | 0.028<br>$\pm 0.014$        | 0.014<br>$\pm 0.018$ | 0.032<br>$\pm 0.010$ | 0.020<br>$\pm 0.015$ | 0.018<br>$\pm 0.017$ | 0.042<br>$\pm 0.012$        | 0.014<br>$\pm 0.012$ | 0.048<br>$\pm 0.031$ | 0.014<br>$\pm 0.016$ | 0.034<br>$\pm 0.030$ | 0.049<br>$\pm 0.028$        | <b>0.063</b><br>$\pm 0.028$ | 0.008<br>$\pm 0.011$        | 0.074<br>$\pm 0.040$ |
|                        | AUC       | 0.630<br>$\pm 0.047$        | 0.619<br>$\pm 0.038$        | 0.623<br>$\pm 0.011$        | 0.579<br>$\pm 0.020$        | 0.564<br>$\pm 0.043$ | 0.541<br>$\pm 0.038$ | 0.523<br>$\pm 0.018$ | 0.602<br>$\pm 0.025$ | 0.561<br>$\pm 0.020$        | 0.591<br>$\pm 0.045$ | 0.566<br>$\pm 0.024$ | 0.606<br>$\pm 0.018$ | 0.652<br>$\pm 0.034$ | <b>0.633</b><br>$\pm 0.054$ | 0.546<br>$\pm 0.023$        | 0.609<br>$\pm 0.041$        | 0.547<br>$\pm 0.049$ |
|                        | BAcc      | 0.070<br>$\pm 0.033$        | 0.061<br>$\pm 0.033$        | 0.052<br>$\pm 0.014$        | 0.039<br>$\pm 0.018$        | 0.056<br>$\pm 0.010$ | 0.044<br>$\pm 0.014$ | 0.043<br>$\pm 0.016$ | 0.066<br>$\pm 0.012$ | 0.039<br>$\pm 0.012$        | 0.072<br>$\pm 0.030$ | 0.039<br>$\pm 0.015$ | 0.058<br>$\pm 0.029$ | 0.072<br>$\pm 0.028$ | <b>0.087</b><br>$\pm 0.027$ | 0.033<br>$\pm 0.010$        | 0.097<br>$\pm 0.039$        | 0.045<br>$\pm 0.018$ |
|                        | Acc.1     | 0.070<br>$\pm 0.033$        | 0.061<br>$\pm 0.033$        | 0.052<br>$\pm 0.014$        | 0.038<br>$\pm 0.018$        | 0.056<br>$\pm 0.010$ | 0.045<br>$\pm 0.014$ | 0.043<br>$\pm 0.016$ | 0.067<br>$\pm 0.012$ | 0.039<br>$\pm 0.011$        | 0.076<br>$\pm 0.031$ | 0.038<br>$\pm 0.015$ | 0.059<br>$\pm 0.030$ | 0.073<br>$\pm 0.029$ | <b>0.088</b><br>$\pm 0.025$ | 0.033<br>$\pm 0.010$        | 0.099<br>$\pm 0.037$        | 0.045<br>$\pm 0.018$ |
|                        | Acc.2     | 0.121<br>$\pm 0.045$        | 0.109<br>$\pm 0.043$        | 0.107<br>$\pm 0.013$        | 0.079<br>$\pm 0.024$        | 0.095<br>$\pm 0.018$ | 0.072<br>$\pm 0.018$ | 0.075<br>$\pm 0.024$ | 0.119<br>$\pm 0.017$ | 0.074<br>$\pm 0.010$        | 0.122<br>$\pm 0.037$ | 0.072<br>$\pm 0.013$ | 0.106<br>$\pm 0.026$ | 0.124<br>$\pm 0.039$ | 0.164<br>$\pm 0.040$        | 0.074<br>$\pm 0.024$        | <b>0.161</b><br>$\pm 0.055$ | 0.079<br>$\pm 0.027$ |
|                        | Subject3  | $\kappa$                    | 0.505<br>$\pm 0.336$        | 0.592<br>$\pm 0.081$        | 0.558<br>$\pm 0.058$        | 0.693<br>$\pm 0.044$ | 0.438<br>$\pm 0.037$ | 0.682<br>$\pm 0.116$ | 0.519<br>$\pm 0.088$ | <b>0.693</b><br>$\pm 0.039$ | 0.025<br>$\pm 0.020$ | 0.092<br>$\pm 0.030$ | 0.056<br>$\pm 0.028$ | 0.393<br>$\pm 0.087$ | 0.544<br>$\pm 0.077$        | 0.672<br>$\pm 0.065$        | 0.008<br>$\pm 0.009$        | 0.613<br>$\pm 0.043$ |
| Continued on next page |           |                             |                             |                             |                             |                      |                      |                      |                      |                             |                      |                      |                      |                      |                             |                             |                             |                      |

| Subject   | Metric           | DeepConvnet                    | EEGNet          | Conformer       | CTNet                          | SSVEPDNN        | BIOT <sup>(1)</sup> | BIOT <sup>(1)</sup> | BENDR <sup>(f)</sup>           | BENDR <sup>(f)</sup> | CBraMod <sup>(f)</sup> | CBraMod <sup>(f)</sup> | EEGPT <sup>(f)</sup> | EEGPT <sup>(f)</sup> | LaBraM <sup>(f)</sup> | LaBraM <sup>(f)</sup> | STEEGformer-s <sup>(f)</sup> | STEEGformer-s <sup>(f)</sup> |
|-----------|------------------|--------------------------------|-----------------|-----------------|--------------------------------|-----------------|---------------------|---------------------|--------------------------------|----------------------|------------------------|------------------------|----------------------|----------------------|-----------------------|-----------------------|------------------------------|------------------------------|
|           | AUC              | 0.908<br>±0.143                | 0.976<br>±0.014 | 0.974<br>±0.010 | 0.987<br>±0.004                | 0.913<br>±0.031 | 0.965<br>±0.018     | 0.952<br>±0.022     | <b>0.981</b><br>± <b>0.007</b> | 0.603<br>±0.023      | 0.683<br>±0.047        | 0.655<br>±0.022        | 0.903<br>±0.035      | 0.964<br>±0.013      | 0.964<br>±0.019       | 0.573<br>±0.011       | 0.943<br>±0.015              | 0.647<br>±0.031              |
|           | B <sub>Acc</sub> | 0.517<br>±0.328                | 0.602<br>±0.079 | 0.569<br>±0.057 | 0.700<br>±0.043                | 0.452<br>±0.036 | 0.690<br>±0.113     | 0.531<br>±0.085     | <b>0.700</b><br>± <b>0.038</b> | 0.050<br>±0.020      | 0.115<br>±0.030        | 0.080<br>±0.028        | 0.408<br>±0.085      | 0.555<br>±0.075      | 0.680<br>±0.063       | 0.033<br>±0.009       | 0.623<br>±0.042              | 0.056<br>±0.018              |
|           | Acc <sub>1</sub> | 0.517<br>±0.328                | 0.602<br>±0.079 | 0.569<br>±0.057 | <b>0.699</b><br>± <b>0.043</b> | 0.452<br>±0.036 | 0.688<br>±0.110     | 0.531<br>±0.085     | 0.700<br>± 0.037               | 0.050<br>±0.020      | 0.114<br>±0.028        | 0.081<br>±0.029        | 0.407<br>±0.085      | 0.555<br>±0.075      | 0.681<br>±0.064       | 0.034<br>±0.009       | 0.619<br>±0.038              | 0.055<br>±0.018              |
|           | Acc <sub>2</sub> | 0.655<br>±0.360                | 0.779<br>±0.068 | 0.744<br>±0.061 | <b>0.856</b><br>± <b>0.039</b> | 0.585<br>±0.042 | 0.833<br>±0.081     | 0.698<br>±0.086     | 0.865<br>± 0.031               | 0.095<br>±0.018      | 0.197<br>±0.035        | 0.142<br>±0.026        | 0.557<br>±0.095      | 0.723<br>±0.061      | 0.821<br>±0.058       | 0.073<br>±0.016       | 0.782<br>±0.035              | 0.114<br>±0.014              |
|           | $\kappa$         | 0.165<br>±0.098                | 0.147<br>±0.020 | 0.092<br>±0.026 | 0.210<br>±0.043                | 0.091<br>±0.017 | 0.137<br>±0.038     | 0.089<br>±0.036     | <b>0.185</b><br>± <b>0.033</b> | 0.021<br>±0.012      | 0.035<br>±0.022        | 0.018<br>±0.020        | 0.051<br>±0.015      | 0.061<br>±0.007      | 0.162<br>±0.022       | 0.005<br>±0.010       | 0.152<br>±0.039              | 0.013<br>±0.017              |
|           | AUC              | <b>0.792</b><br>± <b>0.064</b> | 0.781<br>±0.019 | 0.734<br>±0.037 | 0.823<br>±0.024                | 0.712<br>±0.026 | 0.730<br>±0.033     | 0.692<br>±0.036     | 0.773<br>±0.024                | 0.595<br>±0.029      | 0.629<br>±0.038        | 0.577<br>±0.022        | 0.642<br>±0.029      | 0.689<br>±0.013      | 0.735<br>±0.023       | 0.513<br>±0.009       | 0.706<br>±0.019              | 0.556<br>±0.035              |
|           | B <sub>Acc</sub> | 0.186<br>±0.095                | 0.169<br>±0.019 | 0.115<br>±0.026 | 0.230<br>±0.042                | 0.114<br>±0.016 | 0.159<br>±0.037     | 0.112<br>±0.035     | <b>0.205</b><br>± <b>0.032</b> | 0.046<br>±0.012      | 0.059<br>±0.021        | 0.043<br>±0.019        | 0.075<br>±0.014      | 0.085<br>±0.007      | 0.183<br>±0.021       | 0.030<br>±0.010       | 0.173<br>±0.038              | 0.037<br>±0.017              |
|           | Acc <sub>1</sub> | 0.186<br>±0.095                | 0.169<br>±0.019 | 0.115<br>±0.026 | 0.230<br>±0.042                | 0.114<br>±0.016 | 0.159<br>±0.037     | 0.111<br>±0.035     | <b>0.207</b><br>± <b>0.029</b> | 0.046<br>±0.011      | 0.061<br>±0.021        | 0.042<br>±0.019        | 0.075<br>±0.014      | 0.084<br>±0.007      | 0.184<br>±0.023       | 0.030<br>±0.010       | 0.175<br>±0.037              | 0.037<br>±0.016              |
|           | Acc <sub>2</sub> | 0.277<br>±0.116                | 0.265<br>±0.023 | 0.196<br>±0.047 | 0.353<br>±0.049                | 0.189<br>±0.023 | 0.249<br>±0.053     | 0.187<br>±0.043     | <b>0.319</b><br>± <b>0.030</b> | 0.090<br>±0.014      | 0.118<br>±0.028        | 0.078<br>±0.024        | 0.130<br>±0.012      | 0.149<br>±0.019      | 0.288<br>±0.024       | 0.054<br>±0.012       | 0.255<br>±0.025              | 0.085<br>±0.021              |
| Subject31 | $\kappa$         | 0.201<br>±0.099                | 0.183<br>±0.041 | 0.156<br>±0.020 | <b>0.214</b><br>± <b>0.040</b> | 0.110<br>±0.021 | 0.105<br>±0.031     | 0.061<br>±0.027     | 0.209<br>±0.021                | 0.022<br>±0.007      | 0.078<br>±0.029        | 0.003<br>±0.007        | 0.076<br>±0.027      | 0.105<br>±0.013      | 0.182<br>±0.036       | -0.002<br>±0.006      | 0.267<br>± 0.030             | 0.022<br>±0.023              |
|           | AUC              | 0.854<br>± 0.053               | 0.826<br>±0.039 | 0.777<br>±0.024 | <b>0.843</b><br>± <b>0.024</b> | 0.733<br>±0.022 | 0.687<br>±0.018     | 0.675<br>±0.036     | 0.798<br>±0.018                | 0.582<br>±0.016      | 0.641<br>±0.038        | 0.540<br>±0.027        | 0.683<br>±0.017      | 0.761<br>±0.033      | 0.763<br>±0.030       | 0.541<br>±0.020       | 0.775<br>±0.027              | 0.612<br>±0.043              |
|           | B <sub>Acc</sub> | 0.221<br>±0.097                | 0.204<br>±0.040 | 0.177<br>±0.019 | <b>0.234</b><br>± <b>0.039</b> | 0.132<br>±0.021 | 0.128<br>±0.030     | 0.084<br>±0.027     | 0.229<br>±0.021                | 0.047<br>±0.007      | 0.101<br>±0.028        | 0.028<br>±0.007        | 0.100<br>±0.026      | 0.127<br>±0.013      | 0.203<br>±0.035       | 0.023<br>±0.006       | 0.285<br>± 0.029             | 0.046<br>±0.022              |
|           | Acc <sub>1</sub> | 0.221<br>±0.097                | 0.204<br>±0.040 | 0.178<br>±0.017 | <b>0.234</b><br>± <b>0.037</b> | 0.132<br>±0.021 | 0.127<br>±0.032     | 0.083<br>±0.027     | 0.227<br>±0.020                | 0.047<br>±0.008      | 0.102<br>±0.027        | 0.028<br>±0.006        | 0.100<br>±0.027      | 0.130<br>±0.013      | 0.207<br>±0.034       | 0.023<br>±0.006       | 0.289<br>± 0.024             | 0.050<br>±0.023              |
|           | Acc <sub>2</sub> | <b>0.366</b><br>± <b>0.109</b> | 0.330<br>±0.049 | 0.285<br>±0.033 | 0.362<br>±0.050                | 0.204<br>±0.035 | 0.193<br>±0.033     | 0.158<br>±0.046     | 0.347<br>±0.023                | 0.083<br>±0.015      | 0.169<br>±0.041        | 0.054<br>±0.008        | 0.169<br>±0.034      | 0.223<br>±0.019      | 0.306<br>±0.036       | 0.056<br>±0.010       | 0.409<br>± 0.027             | 0.091<br>±0.030              |
| Subject32 | $\kappa$         | 0.517<br>±0.298                | 0.596<br>±0.045 | 0.668<br>±0.040 | 0.803<br>± 0.029               | 0.648<br>±0.026 | 0.679<br>±0.044     | 0.509<br>±0.033     | <b>0.709</b><br>± <b>0.029</b> | 0.029<br>±0.006      | 0.090<br>±0.031        | 0.040<br>±0.007        | 0.269<br>±0.030      | 0.491<br>±0.024      | 0.637<br>±0.052       | 0.022<br>±0.005       | 0.600<br>±0.055              | 0.033<br>±0.014              |
|           | AUC              | 0.943<br>±0.070                | 0.983<br>±0.003 | 0.981<br>±0.007 | 0.994<br>± 0.003               | 0.978<br>±0.003 | 0.974<br>±0.008     | 0.964<br>±0.010     | <b>0.984</b><br>± <b>0.003</b> | 0.581<br>±0.017      | 0.689<br>±0.034        | 0.664<br>±0.011        | 0.850<br>±0.013      | 0.954<br>±0.004      | 0.957<br>±0.007       | 0.590<br>±0.019       | 0.955<br>±0.009              | 0.658<br>±0.032              |

Continued on next page

| Subject   | Metric   | DeepConvnet  | EEGNet       | Conformer   | CTNet        | SSVEPDNN    | BIOT <sup>(f)</sup> | BIOT <sup>(l)</sup> | BENDR <sup>(f)</sup> | BENDR <sup>(l)</sup> | CBraMod <sup>(f)</sup> | CBraMod <sup>(l)</sup> | EEGPT <sup>(f)</sup> | EEGPT <sup>(l)</sup> | LaBraM <sup>(f)</sup> | LaBraM <sup>(l)</sup> | STEEGformer-s <sup>(f)</sup> | STEEGformer-s <sup>(l)</sup> |
|-----------|----------|--------------|--------------|-------------|--------------|-------------|---------------------|---------------------|----------------------|----------------------|------------------------|------------------------|----------------------|----------------------|-----------------------|-----------------------|------------------------------|------------------------------|
|           | BAcc     | 0.529        | 0.606        | 0.676       | 0.808        | 0.657       | 0.687               | 0.521               | <b>0.716</b>         | 0.053                | 0.113                  | 0.064                  | 0.287                | 0.504                | 0.646                 | 0.046                 | 0.610                        | 0.057                        |
|           |          | $\pm 0.290$  | $\pm 0.044$  | $\pm 0.039$ | $\pm 0.029$  | $\pm 0.025$ | $\pm 0.043$         | $\pm 0.032$         | $\pm 0.028$          | $\pm 0.005$          | $\pm 0.030$            | $\pm 0.007$            | $\pm 0.029$          | $\pm 0.023$          | $\pm 0.051$           | $\pm 0.005$           | $\pm 0.053$                  | $\pm 0.014$                  |
|           | Acc.1    | 0.529        | 0.606        | 0.673       | 0.809        | 0.657       | 0.686               | 0.524               | <b>0.714</b>         | 0.053                | 0.112                  | 0.066                  | 0.287                | 0.505                | 0.646                 | 0.046                 | 0.607                        | 0.056                        |
|           |          | $\pm 0.290$  | $\pm 0.044$  | $\pm 0.040$ | $\pm 0.027$  | $\pm 0.025$ | $\pm 0.044$         | $\pm 0.032$         | $\pm 0.025$          | $\pm 0.006$          | $\pm 0.030$            | $\pm 0.007$            | $\pm 0.028$          | $\pm 0.023$          | $\pm 0.048$           | $\pm 0.005$           | $\pm 0.054$                  | $\pm 0.014$                  |
|           | Acc.2    | 0.653        | 0.795        | 0.818       | 0.924        | 0.804       | <b>0.896</b>        | 0.752               | 0.871                | 0.089                | 0.206                  | 0.122                  | 0.425                | 0.685                | 0.797                 | 0.092                 | 0.771                        | 0.105                        |
|           |          | $\pm 0.273$  | $\pm 0.029$  | $\pm 0.042$ | $\pm 0.025$  | $\pm 0.030$ | $\pm 0.028$         | $\pm 0.035$         | $\pm 0.021$          | $\pm 0.012$          | $\pm 0.036$            | $\pm 0.003$            | $\pm 0.024$          | $\pm 0.021$          | $\pm 0.048$           | $\pm 0.007$           | $\pm 0.037$                  | $\pm 0.006$                  |
|           | $\kappa$ | 0.229        | 0.363        | 0.260       | 0.498        | 0.217       | 0.367               | 0.228               | 0.448                | 0.034                | 0.111                  | -0.003                 | 0.069                | 0.193                | 0.405                 | 0.018                 | <b>0.479</b>                 | 0.017                        |
|           |          | $\pm 0.266$  | $\pm 0.018$  | $\pm 0.036$ | $\pm 0.042$  | $\pm 0.039$ | $\pm 0.023$         | $\pm 0.036$         | $\pm 0.066$          | $\pm 0.012$          | $\pm 0.035$            | $\pm 0.018$            | $\pm 0.023$          | $\pm 0.018$          | $\pm 0.038$           | $\pm 0.016$           | $\pm 0.058$                  | $\pm 0.015$                  |
| Subject33 | AUC      | 0.826        | 0.919        | 0.878       | 0.940        | 0.823       | 0.860               | 0.835               | <b>0.921</b>         | 0.606                | 0.715                  | 0.588                  | 0.669                | 0.814                | 0.894                 | 0.599                 | 0.896                        | 0.632                        |
|           |          | $\pm 0.123$  | $\pm 0.020$  | $\pm 0.032$ | $\pm 0.010$  | $\pm 0.029$ | $\pm 0.021$         | $\pm 0.027$         | $\pm 0.016$          | $\pm 0.025$          | $\pm 0.019$            | $\pm 0.033$            | $\pm 0.026$          | $\pm 0.029$          | $\pm 0.018$           | $\pm 0.011$           | $\pm 0.014$                  | $\pm 0.016$                  |
|           | BAcc     | 0.248        | 0.379        | 0.279       | 0.511        | 0.236       | 0.383               | 0.247               | 0.461                | 0.059                | 0.134                  | 0.022                  | 0.092                | 0.213                | 0.420                 | 0.043                 | <b>0.492</b>                 | 0.042                        |
|           |          | $\pm 0.259$  | $\pm 0.017$  | $\pm 0.035$ | $\pm 0.041$  | $\pm 0.038$ | $\pm 0.022$         | $\pm 0.035$         | $\pm 0.064$          | $\pm 0.012$          | $\pm 0.034$            | $\pm 0.017$            | $\pm 0.022$          | $\pm 0.018$          | $\pm 0.037$           | $\pm 0.015$           | $\pm 0.057$                  | $\pm 0.015$                  |
|           | Acc.1    | 0.248        | 0.379        | 0.277       | 0.510        | 0.236       | 0.381               | 0.246               | 0.461                | 0.059                | 0.135                  | 0.022                  | 0.091                | 0.212                | 0.421                 | 0.042                 | <b>0.489</b>                 | 0.041                        |
|           |          | $\pm 0.259$  | $\pm 0.017$  | $\pm 0.034$ | $\pm 0.041$  | $\pm 0.038$ | $\pm 0.024$         | $\pm 0.035$         | $\pm 0.065$          | $\pm 0.012$          | $\pm 0.035$            | $\pm 0.017$            | $\pm 0.022$          | $\pm 0.017$          | $\pm 0.038$           | $\pm 0.015$           | $\pm 0.058$                  | $\pm 0.015$                  |
|           | Acc.2    | 0.356        | 0.539        | 0.427       | 0.646        | 0.353       | 0.539               | 0.370               | 0.612                | 0.107                | 0.214                  | 0.056                  | 0.157                | 0.326                | 0.573                 | 0.074                 | <b>0.633</b>                 | 0.086                        |
|           |          | $\pm 0.315$  | $\pm 0.043$  | $\pm 0.047$ | $\pm 0.041$  | $\pm 0.052$ | $\pm 0.034$         | $\pm 0.035$         | $\pm 0.052$          | $\pm 0.017$          | $\pm 0.034$            | $\pm 0.020$            | $\pm 0.028$          | $\pm 0.019$          | $\pm 0.041$           | $\pm 0.015$           | $\pm 0.049$                  | $\pm 0.020$                  |
| Subject34 | $\kappa$ | 0.435        | 0.408        | 0.299       | 0.386        | 0.220       | 0.162               | 0.108               | <b>0.429</b>         | 0.017                | 0.094                  | 0.024                  | 0.092                | 0.220                | 0.298                 | -0.004                | 0.304                        | 0.028                        |
|           |          | $\pm 0.085$  | $\pm 0.046$  | $\pm 0.051$ | $\pm 0.036$  | $\pm 0.035$ | $\pm 0.033$         | $\pm 0.033$         | $\pm 0.039$          | $\pm 0.008$          | $\pm 0.039$            | $\pm 0.020$            | $\pm 0.025$          | $\pm 0.030$          | $\pm 0.064$           | $\pm 0.010$           | $\pm 0.028$                  | $\pm 0.019$                  |
|           | AUC      | 0.938        | <b>0.918</b> | 0.865       | 0.909        | 0.811       | 0.746               | 0.718               | 0.913                | 0.588                | 0.640                  | 0.567                  | 0.698                | 0.840                | 0.825                 | 0.514                 | 0.814                        | 0.540                        |
|           |          | $\pm 0.027$  | $\pm 0.016$  | $\pm 0.020$ | $\pm 0.019$  | $\pm 0.030$ | $\pm 0.017$         | $\pm 0.039$         | $\pm 0.014$          | $\pm 0.014$          | $\pm 0.031$            | $\pm 0.020$            | $\pm 0.021$          | $\pm 0.019$          | $\pm 0.027$           | $\pm 0.024$           | $\pm 0.020$                  | $\pm 0.033$                  |
|           | BAcc     | 0.450        | 0.423        | 0.316       | 0.402        | 0.239       | 0.183               | 0.130               | <b>0.444</b>         | 0.041                | 0.116                  | 0.049                  | 0.115                | 0.239                | 0.316                 | 0.021                 | 0.322                        | 0.053                        |
|           |          | $\pm 0.083$  | $\pm 0.044$  | $\pm 0.050$ | $\pm 0.035$  | $\pm 0.034$ | $\pm 0.032$         | $\pm 0.032$         | $\pm 0.038$          | $\pm 0.007$          | $\pm 0.038$            | $\pm 0.020$            | $\pm 0.024$          | $\pm 0.029$          | $\pm 0.062$           | $\pm 0.010$           | $\pm 0.027$                  | $\pm 0.019$                  |
|           | Acc.1    | 0.450        | 0.423        | 0.316       | 0.403        | 0.239       | 0.182               | 0.130               | <b>0.442</b>         | 0.041                | 0.120                  | 0.049                  | 0.116                | 0.240                | 0.317                 | 0.021                 | 0.322                        | 0.052                        |
|           |          | $\pm 0.083$  | $\pm 0.044$  | $\pm 0.050$ | $\pm 0.036$  | $\pm 0.034$ | $\pm 0.031$         | $\pm 0.032$         | $\pm 0.038$          | $\pm 0.007$          | $\pm 0.037$            | $\pm 0.020$            | $\pm 0.024$          | $\pm 0.032$          | $\pm 0.062$           | $\pm 0.010$           | $\pm 0.028$                  | $\pm 0.018$                  |
| Subject35 | Acc.2    | <b>0.614</b> | 0.587        | 0.460       | 0.556        | 0.356       | 0.295               | 0.222               | 0.615                | 0.080                | 0.174                  | 0.087                  | 0.194                | 0.366                | 0.450                 | 0.055                 | 0.456                        | 0.090                        |
|           |          | $\pm 0.107$  | $\pm 0.057$  | $\pm 0.045$ | $\pm 0.049$  | $\pm 0.062$ | $\pm 0.046$         | $\pm 0.056$         | $\pm 0.048$          | $\pm 0.014$          | $\pm 0.043$            | $\pm 0.018$            | $\pm 0.019$          | $\pm 0.039$          | $\pm 0.063$           | $\pm 0.017$           | $\pm 0.038$                  | $\pm 0.034$                  |
|           | $\kappa$ | 0.272        | 0.233        | 0.219       | <b>0.279</b> | 0.213       | 0.188               | 0.111               | 0.313                | 0.032                | 0.097                  | 0.034                  | 0.058                | 0.153                | 0.215                 | 0.028                 | 0.236                        | 0.012                        |
|           |          | $\pm 0.080$  | $\pm 0.071$  | $\pm 0.039$ | $\pm 0.049$  | $\pm 0.039$ | $\pm 0.074$         | $\pm 0.045$         | $\pm 0.040$          | $\pm 0.011$          | $\pm 0.043$            | $\pm 0.020$            | $\pm 0.014$          | $\pm 0.052$          | $\pm 0.038$           | $\pm 0.020$           | $\pm 0.072$                  | $\pm 0.021$                  |
|           | AUC      | <b>0.873</b> | 0.862        | 0.834       | 0.880        | 0.812       | 0.746               | 0.729               | 0.865                | 0.628                | 0.697                  | 0.627                  | 0.678                | 0.780                | 0.803                 | 0.570                 | 0.782                        | 0.584                        |
|           |          | $\pm 0.064$  | $\pm 0.045$  | $\pm 0.026$ | $\pm 0.040$  | $\pm 0.042$ | $\pm 0.076$         | $\pm 0.044$         | $\pm 0.035$          | $\pm 0.018$          | $\pm 0.042$            | $\pm 0.024$            | $\pm 0.026$          | $\pm 0.033$          | $\pm 0.043$           | $\pm 0.030$           | $\pm 0.037$                  | $\pm 0.074$                  |
|           | BAcc     | 0.290        | 0.252        | 0.239       | <b>0.297</b> | 0.233       | 0.209               | 0.133               | 0.330                | 0.056                | 0.119                  | 0.058                  | 0.082                | 0.174                | 0.235                 | 0.052                 | 0.255                        | 0.037                        |
|           |          | $\pm 0.078$  | $\pm 0.070$  | $\pm 0.038$ | $\pm 0.048$  | $\pm 0.038$ | $\pm 0.072$         | $\pm 0.044$         | $\pm 0.039$          | $\pm 0.010$          | $\pm 0.042$            | $\pm 0.019$            | $\pm 0.014$          | $\pm 0.051$          | $\pm 0.037$           | $\pm 0.020$           | $\pm 0.070$                  | $\pm 0.020$                  |

Continued on next page

| Subject  | Metric   | DeepConvnet                 | EEGNet               | Conformer            | CTNet                       | SSVEPDNN             | BIOT (f)             | BIOT (l)             | BENDR (f)                   | BENDR (l)            | CBraMod (f)          | CBraMod (l)          | EEGPT (f)            | EEGPT (l)            | LaBraM (f)           | LaBraM (l)           | STEEGformer-s (f)           | STEEGformer-s (l)    |
|----------|----------|-----------------------------|----------------------|----------------------|-----------------------------|----------------------|----------------------|----------------------|-----------------------------|----------------------|----------------------|----------------------|----------------------|----------------------|----------------------|----------------------|-----------------------------|----------------------|
| Subject4 | Acc.1    | 0.290<br>$\pm 0.078$        | 0.252<br>$\pm 0.070$ | 0.238<br>$\pm 0.039$ | <b>0.295</b><br>$\pm 0.048$ | 0.233<br>$\pm 0.038$ | 0.207<br>$\pm 0.071$ | 0.132<br>$\pm 0.043$ | 0.330<br>$\pm 0.039$        | 0.057<br>$\pm 0.011$ | 0.120<br>$\pm 0.042$ | 0.058<br>$\pm 0.020$ | 0.083<br>$\pm 0.014$ | 0.176<br>$\pm 0.052$ | 0.236<br>$\pm 0.039$ | 0.051<br>$\pm 0.020$ | 0.257<br>$\pm 0.073$        | 0.040<br>$\pm 0.020$ |
|          |          | <b>0.447</b><br>$\pm 0.124$ | 0.387<br>$\pm 0.087$ | 0.363<br>$\pm 0.050$ | 0.438<br>$\pm 0.064$        | 0.341<br>$\pm 0.035$ | 0.307<br>$\pm 0.094$ | 0.217<br>$\pm 0.059$ | 0.465<br>$\pm 0.064$        | 0.101<br>$\pm 0.017$ | 0.197<br>$\pm 0.057$ | 0.100<br>$\pm 0.029$ | 0.160<br>$\pm 0.027$ | 0.271<br>$\pm 0.060$ | 0.358<br>$\pm 0.061$ | 0.094<br>$\pm 0.024$ | 0.375<br>$\pm 0.076$        | 0.082<br>$\pm 0.040$ |
|          | $\kappa$ | 0.247<br>$\pm 0.041$        | 0.188<br>$\pm 0.040$ | 0.110<br>$\pm 0.033$ | 0.218<br>$\pm 0.041$        | 0.118<br>$\pm 0.029$ | 0.217<br>$\pm 0.064$ | 0.125<br>$\pm 0.008$ | 0.169<br>$\pm 0.036$        | 0.009<br>$\pm 0.005$ | 0.023<br>$\pm 0.028$ | 0.024<br>$\pm 0.022$ | 0.048<br>$\pm 0.012$ | 0.064<br>$\pm 0.023$ | 0.225<br>$\pm 0.046$ | 0.012<br>$\pm 0.014$ | <b>0.225</b><br>$\pm 0.045$ | 0.012<br>$\pm 0.018$ |
|          |          | 0.846<br>$\pm 0.028$        | 0.801<br>$\pm 0.027$ | 0.752<br>$\pm 0.022$ | <b>0.816</b><br>$\pm 0.025$ | 0.733<br>$\pm 0.023$ | 0.768<br>$\pm 0.041$ | 0.739<br>$\pm 0.023$ | 0.752<br>$\pm 0.035$        | 0.538<br>$\pm 0.018$ | 0.569<br>$\pm 0.039$ | 0.557<br>$\pm 0.016$ | 0.638<br>$\pm 0.023$ | 0.704<br>$\pm 0.006$ | 0.771<br>$\pm 0.027$ | 0.515<br>$\pm 0.021$ | 0.748<br>$\pm 0.040$        | 0.539<br>$\pm 0.017$ |
|          | BAcc     | 0.266<br>$\pm 0.040$        | 0.209<br>$\pm 0.039$ | 0.133<br>$\pm 0.032$ | 0.237<br>$\pm 0.040$        | 0.140<br>$\pm 0.028$ | 0.236<br>$\pm 0.062$ | 0.147<br>$\pm 0.008$ | 0.190<br>$\pm 0.035$        | 0.034<br>$\pm 0.005$ | 0.047<br>$\pm 0.028$ | 0.049<br>$\pm 0.021$ | 0.072<br>$\pm 0.011$ | 0.087<br>$\pm 0.023$ | 0.244<br>$\pm 0.045$ | 0.037<br>$\pm 0.013$ | <b>0.245</b><br>$\pm 0.044$ | 0.036<br>$\pm 0.018$ |
|          | Acc.1    | 0.266<br>$\pm 0.040$        | 0.211<br>$\pm 0.039$ | 0.133<br>$\pm 0.033$ | 0.239<br>$\pm 0.043$        | 0.140<br>$\pm 0.028$ | 0.236<br>$\pm 0.064$ | 0.146<br>$\pm 0.006$ | 0.190<br>$\pm 0.035$        | 0.035<br>$\pm 0.005$ | 0.048<br>$\pm 0.029$ | 0.048<br>$\pm 0.021$ | 0.073<br>$\pm 0.013$ | 0.086<br>$\pm 0.023$ | 0.246<br>$\pm 0.045$ | 0.036<br>$\pm 0.013$ | <b>0.247</b><br>$\pm 0.044$ | 0.037<br>$\pm 0.017$ |
| Subject5 | Acc.2    | 0.386<br>$\pm 0.040$        | 0.328<br>$\pm 0.034$ | 0.231<br>$\pm 0.033$ | <b>0.366</b><br>$\pm 0.061$ | 0.240<br>$\pm 0.026$ | 0.357<br>$\pm 0.073$ | 0.245<br>$\pm 0.022$ | 0.302<br>$\pm 0.046$        | 0.061<br>$\pm 0.012$ | 0.078<br>$\pm 0.033$ | 0.080<br>$\pm 0.024$ | 0.127<br>$\pm 0.021$ | 0.157<br>$\pm 0.019$ | 0.361<br>$\pm 0.047$ | 0.066<br>$\pm 0.018$ | 0.349<br>$\pm 0.061$        | 0.065<br>$\pm 0.033$ |
|          | $\kappa$ | 0.653<br>$\pm 0.222$        | 0.632<br>$\pm 0.079$ | 0.621<br>$\pm 0.042$ | <b>0.755</b><br>$\pm 0.030$ | 0.453<br>$\pm 0.050$ | 0.764<br>$\pm 0.033$ | 0.604<br>$\pm 0.051$ | 0.743<br>$\pm 0.038$        | 0.052<br>$\pm 0.016$ | 0.123<br>$\pm 0.049$ | 0.068<br>$\pm 0.034$ | 0.412<br>$\pm 0.020$ | 0.574<br>$\pm 0.062$ | 0.697<br>$\pm 0.066$ | 0.003<br>$\pm 0.011$ | 0.666<br>$\pm 0.064$        | 0.046<br>$\pm 0.039$ |
|          |          | 0.980<br>$\pm 0.027$        | 0.980<br>$\pm 0.008$ | 0.980<br>$\pm 0.003$ | 0.991<br>$\pm 0.003$        | 0.933<br>$\pm 0.015$ | 0.984<br>$\pm 0.004$ | 0.976<br>$\pm 0.011$ | <b>0.985</b><br>$\pm 0.006$ | 0.662<br>$\pm 0.016$ | 0.750<br>$\pm 0.025$ | 0.681<br>$\pm 0.031$ | 0.911<br>$\pm 0.015$ | 0.971<br>$\pm 0.008$ | 0.972<br>$\pm 0.009$ | 0.562<br>$\pm 0.041$ | 0.959<br>$\pm 0.013$        | 0.619<br>$\pm 0.033$ |
|          | BAcc     | 0.661<br>$\pm 0.217$        | 0.641<br>$\pm 0.077$ | 0.631<br>$\pm 0.041$ | <b>0.761</b><br>$\pm 0.029$ | 0.467<br>$\pm 0.049$ | 0.770<br>$\pm 0.033$ | 0.614<br>$\pm 0.050$ | 0.750<br>$\pm 0.037$        | 0.075<br>$\pm 0.016$ | 0.145<br>$\pm 0.048$ | 0.091<br>$\pm 0.034$ | 0.426<br>$\pm 0.020$ | 0.585<br>$\pm 0.061$ | 0.705<br>$\pm 0.065$ | 0.028<br>$\pm 0.010$ | 0.674<br>$\pm 0.062$        | 0.070<br>$\pm 0.038$ |
|          | Acc.1    | 0.661<br>$\pm 0.217$        | 0.641<br>$\pm 0.077$ | 0.631<br>$\pm 0.041$ | <b>0.761</b><br>$\pm 0.029$ | 0.467<br>$\pm 0.049$ | 0.770<br>$\pm 0.035$ | 0.614<br>$\pm 0.049$ | 0.751<br>$\pm 0.038$        | 0.076<br>$\pm 0.016$ | 0.144<br>$\pm 0.046$ | 0.092<br>$\pm 0.034$ | 0.426<br>$\pm 0.020$ | 0.585<br>$\pm 0.059$ | 0.705<br>$\pm 0.064$ | 0.028<br>$\pm 0.010$ | 0.673<br>$\pm 0.063$        | 0.068<br>$\pm 0.037$ |
|          | Acc.2    | 0.820<br>$\pm 0.194$        | 0.823<br>$\pm 0.054$ | 0.810<br>$\pm 0.023$ | <b>0.910</b><br>$\pm 0.023$ | 0.609<br>$\pm 0.048$ | 0.915<br>$\pm 0.027$ | 0.812<br>$\pm 0.056$ | 0.884<br>$\pm 0.021$        | 0.133<br>$\pm 0.018$ | 0.243<br>$\pm 0.043$ | 0.158<br>$\pm 0.038$ | 0.564<br>$\pm 0.029$ | 0.764<br>$\pm 0.062$ | 0.874<br>$\pm 0.053$ | 0.066<br>$\pm 0.018$ | 0.817<br>$\pm 0.054$        | 0.115<br>$\pm 0.050$ |
| Subject6 | $\kappa$ | 0.665<br>$\pm 0.048$        | 0.483<br>$\pm 0.026$ | 0.538<br>$\pm 0.043$ | <b>0.629</b><br>$\pm 0.025$ | 0.239<br>$\pm 0.139$ | 0.493<br>$\pm 0.049$ | 0.322<br>$\pm 0.045$ | 0.536<br>$\pm 0.043$        | 0.025<br>$\pm 0.015$ | 0.115<br>$\pm 0.040$ | 0.037<br>$\pm 0.017$ | 0.198<br>$\pm 0.020$ | 0.338<br>$\pm 0.030$ | 0.554<br>$\pm 0.040$ | 0.018<br>$\pm 0.009$ | 0.605<br>$\pm 0.027$        | 0.030<br>$\pm 0.015$ |
|          |          | 0.988<br>$\pm 0.004$        | 0.968<br>$\pm 0.006$ | 0.965<br>$\pm 0.008$ | <b>0.979</b><br>$\pm 0.009$ | 0.808<br>$\pm 0.173$ | 0.916<br>$\pm 0.020$ | 0.904<br>$\pm 0.023$ | 0.952<br>$\pm 0.007$        | 0.595<br>$\pm 0.009$ | 0.708<br>$\pm 0.033$ | 0.641<br>$\pm 0.012$ | 0.806<br>$\pm 0.007$ | 0.914<br>$\pm 0.009$ | 0.940<br>$\pm 0.016$ | 0.536<br>$\pm 0.026$ | 0.949<br>$\pm 0.009$        | 0.633<br>$\pm 0.049$ |
|          | BAcc     | 0.673<br>$\pm 0.047$        | 0.496<br>$\pm 0.025$ | 0.550<br>$\pm 0.042$ | <b>0.638</b><br>$\pm 0.024$ | 0.258<br>$\pm 0.135$ | 0.505<br>$\pm 0.047$ | 0.339<br>$\pm 0.044$ | 0.547<br>$\pm 0.042$        | 0.049<br>$\pm 0.015$ | 0.137<br>$\pm 0.039$ | 0.061<br>$\pm 0.016$ | 0.218<br>$\pm 0.020$ | 0.354<br>$\pm 0.029$ | 0.565<br>$\pm 0.039$ | 0.043<br>$\pm 0.009$ | 0.615<br>$\pm 0.026$        | 0.054<br>$\pm 0.015$ |
|          | Acc.1    | 0.673<br>$\pm 0.047$        | 0.496<br>$\pm 0.025$ | 0.550<br>$\pm 0.042$ | <b>0.638</b><br>$\pm 0.024$ | 0.258<br>$\pm 0.135$ | 0.502<br>$\pm 0.048$ | 0.338<br>$\pm 0.044$ | 0.547<br>$\pm 0.042$        | 0.049<br>$\pm 0.015$ | 0.135<br>$\pm 0.038$ | 0.060<br>$\pm 0.016$ | 0.217<br>$\pm 0.018$ | 0.351<br>$\pm 0.028$ | 0.562<br>$\pm 0.040$ | 0.042<br>$\pm 0.009$ | 0.612<br>$\pm 0.027$        | 0.053<br>$\pm 0.014$ |
|          |          |                             |                      |                      |                             |                      |                      |                      |                             |                      |                      |                      |                      |                      |                      |                      |                             |                      |

Continued on next page



| Subject  | Metric   | DeepConvnet                    | EEGNet          | Conformer                      | CTNet                          | SSVEPDNN        | BIOT <sup>(i)</sup> | BIOT <sup>(i)</sup> | BENDR <sup>(f)</sup> | BENDR <sup>(i)</sup> | CBraMod <sup>(f)</sup> | CBraMod <sup>(i)</sup> | EEGPT <sup>(f)</sup> | EEGPT <sup>(i)</sup> | LaBraM <sup>(f)</sup> | LaBraM <sup>(i)</sup> | STEEGformer-s <sup>(i)</sup>   | STEEGformer-s <sup>(i)</sup> |
|----------|----------|--------------------------------|-----------------|--------------------------------|--------------------------------|-----------------|---------------------|---------------------|----------------------|----------------------|------------------------|------------------------|----------------------|----------------------|-----------------------|-----------------------|--------------------------------|------------------------------|
| Subject7 | Acc.2    | 0.838<br>± 0.043               | 0.707<br>±0.035 | 0.720<br>±0.029                | <b>0.805</b><br>± <b>0.012</b> | 0.371<br>±0.182 | 0.682<br>±0.057     | 0.518<br>±0.033     | 0.716<br>±0.024      | 0.091<br>±0.015      | 0.211<br>±0.045        | 0.108<br>±0.021        | 0.341<br>±0.017      | 0.512<br>±0.037      | 0.706<br>±0.045       | 0.074<br>±0.012       | 0.781<br>±0.028                | 0.083<br>±0.018              |
|          | $\kappa$ | 0.196<br>±0.167                | 0.298<br>±0.067 | 0.335<br>±0.043                | 0.430<br>± 0.085               | 0.153<br>±0.037 | 0.346<br>±0.040     | 0.256<br>±0.046     | 0.331<br>±0.035      | 0.011<br>±0.017      | 0.068<br>±0.035        | 0.006<br>±0.017        | 0.083<br>±0.011      | 0.200<br>±0.032      | 0.341<br>±0.056       | 0.017<br>±0.014       | <b>0.358</b><br>± <b>0.078</b> | 0.028<br>±0.014              |
|          | AUC      | 0.844<br>±0.088                | 0.894<br>±0.031 | <b>0.917</b><br>± <b>0.023</b> | 0.945<br>± 0.022               | 0.791<br>±0.028 | 0.862<br>±0.021     | 0.863<br>±0.020     | 0.871<br>±0.034      | 0.575<br>±0.013      | 0.667<br>±0.031        | 0.581<br>±0.021        | 0.706<br>±0.033      | 0.838<br>±0.022      | 0.854<br>±0.032       | 0.576<br>±0.012       | 0.837<br>±0.039                | 0.644<br>±0.045              |
|          | BAcc     | 0.216<br>±0.163                | 0.315<br>±0.065 | 0.352<br>±0.041                | 0.444<br>± 0.083               | 0.174<br>±0.036 | 0.363<br>±0.039     | 0.275<br>±0.045     | 0.348<br>±0.034      | 0.036<br>±0.016      | 0.091<br>±0.034        | 0.031<br>±0.017        | 0.105<br>±0.011      | 0.220<br>±0.032      | 0.358<br>±0.054       | 0.042<br>±0.014       | <b>0.374</b><br>± <b>0.076</b> | 0.052<br>±0.014              |
|          | Acc.1    | 0.216<br>±0.163                | 0.315<br>±0.066 | 0.352<br>±0.041                | 0.445<br>± 0.084               | 0.174<br>±0.036 | 0.366<br>±0.040     | 0.278<br>±0.045     | 0.346<br>±0.032      | 0.035<br>±0.016      | 0.091<br>±0.034        | 0.031<br>±0.017        | 0.106<br>±0.011      | 0.220<br>±0.031      | 0.358<br>±0.051       | 0.042<br>±0.014       | <b>0.374</b><br>± <b>0.074</b> | 0.052<br>±0.013              |
|          | Acc.2    | 0.334<br>±0.239                | 0.464<br>±0.068 | <b>0.537</b><br>± <b>0.056</b> | 0.621<br>± 0.091               | 0.270<br>±0.035 | 0.530<br>±0.027     | 0.434<br>±0.049     | 0.492<br>±0.044      | 0.071<br>±0.019      | 0.159<br>±0.032        | 0.068<br>±0.023        | 0.190<br>±0.026      | 0.341<br>±0.029      | 0.506<br>±0.054       | 0.079<br>±0.014       | 0.527<br>±0.092                | 0.111<br>±0.029              |
|          | $\kappa$ | <b>0.407</b><br>± <b>0.063</b> | 0.354<br>±0.042 | 0.319<br>±0.070                | 0.405<br>±0.071                | 0.187<br>±0.111 | 0.317<br>±0.074     | 0.252<br>±0.044     | 0.436<br>± 0.051     | 0.015<br>±0.021      | 0.053<br>±0.041        | 0.033<br>±0.024        | 0.179<br>±0.017      | 0.307<br>±0.041      | 0.383<br>±0.029       | 0.017<br>±0.015       | 0.379<br>±0.067                | 0.025<br>±0.018              |
| Subject8 | AUC      | 0.942<br>± 0.009               | 0.917<br>±0.022 | 0.894<br>±0.013                | <b>0.935</b><br>± <b>0.021</b> | 0.775<br>±0.154 | 0.834<br>±0.043     | 0.851<br>±0.041     | 0.930<br>±0.016      | 0.572<br>±0.026      | 0.642<br>±0.051        | 0.596<br>±0.033        | 0.790<br>±0.018      | 0.900<br>±0.015      | 0.881<br>±0.013       | 0.569<br>±0.034       | 0.856<br>±0.042                | 0.625<br>±0.043              |
|          | BAcc     | <b>0.422</b><br>± <b>0.061</b> | 0.370<br>±0.041 | 0.336<br>±0.068                | 0.420<br>±0.069                | 0.208<br>±0.109 | 0.334<br>±0.073     | 0.271<br>±0.043     | 0.451<br>± 0.050     | 0.039<br>±0.020      | 0.077<br>±0.040        | 0.057<br>±0.023        | 0.199<br>±0.016      | 0.325<br>±0.040      | 0.398<br>±0.028       | 0.042<br>±0.014       | 0.394<br>±0.065                | 0.050<br>±0.018              |
|          | Acc.1    | <b>0.422</b><br>± <b>0.061</b> | 0.370<br>±0.041 | 0.336<br>±0.068                | 0.420<br>±0.070                | 0.208<br>±0.109 | 0.330<br>±0.072     | 0.268<br>±0.043     | 0.452<br>± 0.049     | 0.041<br>±0.021      | 0.077<br>±0.041        | 0.058<br>±0.023        | 0.201<br>±0.017      | 0.327<br>±0.041      | 0.398<br>±0.028       | 0.041<br>±0.014       | 0.395<br>±0.062                | 0.049<br>±0.018              |
|          | Acc.2    | 0.601<br>±0.067                | 0.525<br>±0.054 | 0.482<br>±0.059                | <b>0.614</b><br>± <b>0.070</b> | 0.305<br>±0.145 | 0.507<br>±0.066     | 0.410<br>±0.053     | 0.636<br>± 0.053     | 0.076<br>±0.028      | 0.140<br>±0.048        | 0.112<br>±0.032        | 0.303<br>±0.016      | 0.489<br>±0.046      | 0.555<br>±0.031       | 0.081<br>±0.031       | 0.540<br>±0.086                | 0.092<br>±0.020              |
|          | $\kappa$ | 0.432<br>± 0.092               | 0.322<br>±0.029 | 0.332<br>±0.067                | <b>0.428</b><br>± <b>0.047</b> | 0.249<br>±0.033 | 0.381<br>±0.024     | 0.195<br>±0.042     | 0.406<br>±0.033      | 0.022<br>±0.011      | 0.085<br>±0.022        | 0.002<br>±0.012        | 0.110<br>±0.015      | 0.180<br>±0.028      | 0.287<br>±0.034       | 0.003<br>±0.008       | 0.379<br>±0.045                | 0.027<br>±0.009              |
|          | AUC      | <b>0.941</b><br>± <b>0.035</b> | 0.911<br>±0.012 | 0.899<br>±0.022                | 0.944<br>± 0.007               | 0.814<br>±0.029 | 0.866<br>±0.010     | 0.841<br>±0.012     | 0.905<br>±0.013      | 0.609<br>±0.019      | 0.690<br>±0.030        | 0.536<br>±0.035        | 0.732<br>±0.007      | 0.800<br>±0.006      | 0.845<br>±0.018       | 0.537<br>±0.018       | 0.853<br>±0.024                | 0.606<br>±0.045              |
| Subject9 | BAcc     | 0.446<br>± 0.089               | 0.339<br>±0.028 | 0.349<br>±0.065                | <b>0.443</b><br>± <b>0.046</b> | 0.268<br>±0.032 | 0.396<br>±0.024     | 0.215<br>±0.041     | 0.421<br>±0.032      | 0.046<br>±0.010      | 0.108<br>±0.021        | 0.027<br>±0.012        | 0.132<br>±0.015      | 0.200<br>±0.027      | 0.305<br>±0.033       | 0.028<br>±0.008       | 0.395<br>±0.044                | 0.051<br>±0.008              |
|          | Acc.1    | 0.446<br>± 0.089               | 0.339<br>±0.028 | 0.349<br>±0.065                | <b>0.443</b><br>± <b>0.047</b> | 0.268<br>±0.032 | 0.398<br>±0.023     | 0.216<br>±0.040     | 0.422<br>±0.033      | 0.047<br>±0.010      | 0.108<br>±0.022        | 0.026<br>±0.012        | 0.133<br>±0.016      | 0.200<br>±0.028      | 0.303<br>±0.030       | 0.028<br>±0.008       | 0.394<br>±0.045                | 0.051<br>±0.008              |
|          | Acc.2    | <b>0.601</b><br>± <b>0.084</b> | 0.496<br>±0.054 | 0.488<br>±0.066                | 0.609<br>± 0.036               | 0.371<br>±0.034 | 0.548<br>±0.033     | 0.354<br>±0.027     | 0.568<br>±0.043      | 0.092<br>±0.018      | 0.180<br>±0.028        | 0.050<br>±0.022        | 0.220<br>±0.028      | 0.306<br>±0.041      | 0.445<br>±0.026       | 0.059<br>±0.018       | 0.531<br>±0.053                | 0.090<br>±0.010              |

9786  
9787  
9788  
9789  
9790  
9791  
9792  
9793  
9794  
9795  
9796  
9797  
9798  
9799  
9800  
9801  
9802  
9803  
9804  
9805  
9806  
9807  
9808  
9809  
9810  
9811  
9812  
9813  
9814  
9815  
9816  
9817  
9818

## Generalization Drop After Fine-Tuning

Table 73: Average Model Performance Drop

| Model (Strategy)         | $\kappa$     | AUC          | BAcc         | Acc.1        | Acc.2        |
|--------------------------|--------------|--------------|--------------|--------------|--------------|
|                          | 0.193        | 0.148        | 0.188        | 0.188        | 0.247        |
| <b>DeepConvnet</b>       | $\pm 0.053$  | $\pm 0.039$  | $\pm 0.051$  | $\pm 0.051$  | $\pm 0.065$  |
|                          | 0.186        | 0.147        | 0.181        | 0.181        | 0.245        |
| <b>EEGNet</b>            | $\pm 0.031$  | $\pm 0.038$  | $\pm 0.030$  | $\pm 0.030$  | $\pm 0.044$  |
|                          | 0.161        | 0.159        | 0.157        | 0.157        | 0.215        |
| <b>Conformer</b>         | $\pm 0.037$  | $\pm 0.047$  | $\pm 0.036$  | $\pm 0.036$  | $\pm 0.051$  |
|                          | 0.270        | 0.163        | 0.263        | 0.263        | 0.338        |
| <b>CTNet</b>             | $\pm 0.032$  | $\pm 0.039$  | $\pm 0.031$  | $\pm 0.031$  | $\pm 0.046$  |
|                          | 0.143        | 0.165        | 0.139        | 0.139        | 0.195        |
| <b>SSVEPDNN</b>          | $\pm 0.025$  | $\pm 0.037$  | $\pm 0.024$  | $\pm 0.024$  | $\pm 0.035$  |
|                          | 0.101        | 0.060        | 0.098        | 0.098        | 0.131        |
| <b>BIOT (f)</b>          | $\pm 0.036$  | $\pm 0.029$  | $\pm 0.035$  | $\pm 0.035$  | $\pm 0.052$  |
|                          | 0.131        | 0.130        | 0.128        | 0.128        | 0.206        |
| <b>BIOT (l)</b>          | $\pm 0.025$  | $\pm 0.035$  | $\pm 0.024$  | $\pm 0.024$  | $\pm 0.037$  |
|                          | 0.072        | 0.048        | 0.070        | 0.070        | 0.084        |
| <b>BENDR (f)</b>         | $\pm 0.038$  | $\pm 0.025$  | $\pm 0.037$  | $\pm 0.037$  | $\pm 0.046$  |
|                          | 0.016        | 0.083        | 0.015        | 0.016        | 0.028        |
| <b>BENDR (l)</b>         | $\pm 0.004$  | $\pm 0.012$  | $\pm 0.004$  | $\pm 0.004$  | $\pm 0.006$  |
|                          | <b>0.010</b> | 0.016        | <b>0.010</b> | <b>0.010</b> | <b>0.017</b> |
| <b>CBraMod (f)</b>       | $\pm 0.005$  | $\pm 0.007$  | $\pm 0.005$  | $\pm 0.005$  | $\pm 0.007$  |
|                          | 0.020        | 0.086        | 0.020        | 0.021        | 0.036        |
| <b>CBraMod (l)</b>       | $\pm 0.004$  | $\pm 0.017$  | $\pm 0.004$  | $\pm 0.004$  | $\pm 0.007$  |
|                          | 0.026        | <b>0.026</b> | 0.026        | 0.026        | 0.034        |
| <b>EEGPT (f)</b>         | $\pm 0.014$  | $\pm 0.018$  | $\pm 0.013$  | $\pm 0.013$  | $\pm 0.019$  |
|                          | 0.155        | 0.162        | 0.151        | 0.152        | 0.216        |
| <b>EEGPT (l)</b>         | $\pm 0.020$  | $\pm 0.038$  | $\pm 0.020$  | $\pm 0.020$  | $\pm 0.030$  |
|                          | 0.099        | 0.044        | 0.097        | 0.097        | 0.111        |
| <b>LaBraM (f)</b>        | $\pm 0.033$  | $\pm 0.019$  | $\pm 0.032$  | $\pm 0.032$  | $\pm 0.039$  |
|                          | 0.006        | 0.029        | 0.006        | 0.006        | 0.010        |
| <b>LaBraM (l)</b>        | $\pm 0.001$  | $\pm 0.005$  | $\pm 0.001$  | $\pm 0.001$  | $\pm 0.002$  |
|                          | 0.118        | 0.061        | 0.115        | 0.115        | 0.136        |
| <b>STEEGformer-s (f)</b> | $\pm 0.038$  | $\pm 0.029$  | $\pm 0.037$  | $\pm 0.037$  | $\pm 0.048$  |
|                          | 0.012        | 0.056        | 0.012        | 0.012        | 0.021        |
| <b>STEEGformer-s (l)</b> | $\pm 0.002$  | $\pm 0.011$  | $\pm 0.002$  | $\pm 0.002$  | $\pm 0.003$  |

Table 74: Per-Subject Average Drop on Seen Subjects (Post-Fine-Tuning).

| Subject   | Metric   | DeepConvnet | EEGNet      | Conformer   | CTNet       | SSVEPDNN    | BIOT <sup>(f)</sup> | BIOT <sup>(l)</sup> | BENDR <sup>(f)</sup> | BENDR <sup>(l)</sup> | CBraMod <sup>(f)</sup> | CBraMod <sup>(l)</sup> | EEGPT <sup>(f)</sup> | EEGPT <sup>(l)</sup> | LaBraM <sup>(f)</sup> | LaBraM <sup>(l)</sup> | STEEGformer-s <sup>(f)</sup> | STEEGformer-s <sup>(l)</sup> |
|-----------|----------|-------------|-------------|-------------|-------------|-------------|---------------------|---------------------|----------------------|----------------------|------------------------|------------------------|----------------------|----------------------|-----------------------|-----------------------|------------------------------|------------------------------|
| Subject1  | $\kappa$ | 0.224       | 0.201       | 0.180       | 0.291       | 0.159       | 0.085               | 0.119               | 0.102                | 0.018                | 0.013                  | 0.023                  | 0.049                | 0.175                | 0.109                 | 0.006                 | 0.144                        | <b>0.012</b>                 |
|           |          | $\pm 0.140$ | $\pm 0.135$ | $\pm 0.110$ | $\pm 0.166$ | $\pm 0.109$ | $\pm 0.053$         | $\pm 0.086$         | $\pm 0.075$          | $\pm 0.007$          | $\pm 0.018$            | $\pm 0.019$            | $\pm 0.047$          | $\pm 0.115$          | $\pm 0.063$           | $\pm 0.005$           | $\pm 0.077$                  | $\pm 0.010$                  |
|           | AUC      | 0.171       | 0.162       | 0.176       | 0.163       | 0.199       | 0.042               | 0.108               | 0.070                | 0.101                | 0.009                  | 0.094                  | 0.056                | 0.216                | 0.040                 | <b>0.029</b>          | 0.077                        | 0.053                        |
|           |          | $\pm 0.067$ | $\pm 0.064$ | $\pm 0.053$ | $\pm 0.059$ | $\pm 0.068$ | $\pm 0.024$         | $\pm 0.042$         | $\pm 0.040$          | $\pm 0.023$          | $\pm 0.022$            | $\pm 0.038$            | $\pm 0.028$          | $\pm 0.058$          | $\pm 0.020$           | $\pm 0.018$           | $\pm 0.029$                  | $\pm 0.027$                  |
|           | BAcc     | 0.219       | 0.196       | 0.175       | 0.283       | 0.155       | 0.083               | 0.116               | 0.100                | 0.017                | 0.013                  | 0.023                  | 0.048                | 0.171                | 0.106                 | 0.005                 | 0.140                        | <b>0.012</b>                 |
|           |          | $\pm 0.136$ | $\pm 0.132$ | $\pm 0.107$ | $\pm 0.161$ | $\pm 0.106$ | $\pm 0.052$         | $\pm 0.084$         | $\pm 0.073$          | $\pm 0.007$          | $\pm 0.018$            | $\pm 0.019$            | $\pm 0.046$          | $\pm 0.112$          | $\pm 0.061$           | $\pm 0.005$           | $\pm 0.075$                  | $\pm 0.010$                  |
| Subject10 | Acc.1    | 0.219       | 0.196       | 0.175       | 0.283       | 0.155       | 0.084               | 0.116               | 0.099                | 0.017                | 0.013                  | 0.024                  | 0.048                | 0.172                | 0.108                 | 0.006                 | 0.142                        | <b>0.012</b>                 |
|           |          | $\pm 0.136$ | $\pm 0.132$ | $\pm 0.107$ | $\pm 0.161$ | $\pm 0.106$ | $\pm 0.052$         | $\pm 0.084$         | $\pm 0.073$          | $\pm 0.007$          | $\pm 0.018$            | $\pm 0.019$            | $\pm 0.046$          | $\pm 0.112$          | $\pm 0.062$           | $\pm 0.005$           | $\pm 0.076$                  | $\pm 0.011$                  |
|           | Acc.2    | 0.283       | 0.263       | 0.240       | 0.361       | 0.221       | 0.109               | 0.186               | 0.119                | 0.034                | 0.021                  | 0.038                  | 0.065                | 0.247                | 0.123                 | 0.011                 | 0.163                        | <b>0.020</b>                 |
|           |          | $\pm 0.156$ | $\pm 0.162$ | $\pm 0.131$ | $\pm 0.185$ | $\pm 0.136$ | $\pm 0.056$         | $\pm 0.120$         | $\pm 0.082$          | $\pm 0.012$          | $\pm 0.025$            | $\pm 0.026$            | $\pm 0.056$          | $\pm 0.144$          | $\pm 0.061$           | $\pm 0.008$           | $\pm 0.079$                  | $\pm 0.017$                  |
| Subject11 | $\kappa$ | 0.247       | 0.235       | 0.209       | 0.318       | 0.178       | 0.108               | 0.148               | 0.137                | 0.016                | <b>0.006</b>           | 0.019                  | 0.047                | 0.173                | 0.133                 | 0.006                 | 0.149                        | 0.010                        |
|           |          | $\pm 0.146$ | $\pm 0.141$ | $\pm 0.137$ | $\pm 0.173$ | $\pm 0.114$ | $\pm 0.063$         | $\pm 0.097$         | $\pm 0.078$          | $\pm 0.008$          | $\pm 0.012$            | $\pm 0.015$            | $\pm 0.040$          | $\pm 0.110$          | $\pm 0.077$           | $\pm 0.008$           | $\pm 0.080$                  | $\pm 0.011$                  |
|           | AUC      | 0.199       | 0.194       | 0.218       | 0.206       | 0.211       | 0.061               | 0.140               | 0.090                | 0.088                | 0.019                  | 0.085                  | 0.054                | 0.196                | 0.064                 | <b>0.025</b>          | 0.089                        | 0.045                        |
|           |          | $\pm 0.063$ | $\pm 0.054$ | $\pm 0.065$ | $\pm 0.059$ | $\pm 0.070$ | $\pm 0.023$         | $\pm 0.051$         | $\pm 0.038$          | $\pm 0.022$          | $\pm 0.012$            | $\pm 0.035$            | $\pm 0.026$          | $\pm 0.058$          | $\pm 0.027$           | $\pm 0.015$           | $\pm 0.033$                  | $\pm 0.022$                  |
|           | BAcc     | 0.241       | 0.229       | 0.204       | 0.310       | 0.174       | 0.106               | 0.144               | 0.134                | 0.016                | <b>0.006</b>           | 0.018                  | 0.046                | 0.169                | 0.130                 | 0.006                 | 0.145                        | 0.010                        |
|           |          | $\pm 0.142$ | $\pm 0.137$ | $\pm 0.133$ | $\pm 0.169$ | $\pm 0.111$ | $\pm 0.062$         | $\pm 0.094$         | $\pm 0.076$          | $\pm 0.008$          | $\pm 0.012$            | $\pm 0.015$            | $\pm 0.039$          | $\pm 0.107$          | $\pm 0.075$           | $\pm 0.008$           | $\pm 0.078$                  | $\pm 0.011$                  |
| Subject11 | Acc.1    | 0.241       | 0.229       | 0.204       | 0.310       | 0.174       | 0.106               | 0.144               | 0.133                | 0.016                | <b>0.006</b>           | 0.018                  | 0.045                | 0.169                | 0.131                 | 0.006                 | 0.146                        | 0.010                        |
|           |          | $\pm 0.142$ | $\pm 0.137$ | $\pm 0.133$ | $\pm 0.169$ | $\pm 0.111$ | $\pm 0.062$         | $\pm 0.095$         | $\pm 0.076$          | $\pm 0.008$          | $\pm 0.011$            | $\pm 0.015$            | $\pm 0.039$          | $\pm 0.107$          | $\pm 0.076$           | $\pm 0.008$           | $\pm 0.078$                  | $\pm 0.011$                  |
|           | Acc.2    | 0.322       | 0.312       | 0.285       | 0.404       | 0.245       | 0.143               | 0.230               | 0.162                | 0.030                | <b>0.014</b>           | 0.033                  | 0.061                | 0.242                | 0.154                 | 0.010                 | 0.172                        | 0.017                        |
|           |          | $\pm 0.169$ | $\pm 0.168$ | $\pm 0.167$ | $\pm 0.199$ | $\pm 0.140$ | $\pm 0.071$         | $\pm 0.141$         | $\pm 0.089$          | $\pm 0.012$          | $\pm 0.016$            | $\pm 0.022$            | $\pm 0.047$          | $\pm 0.138$          | $\pm 0.075$           | $\pm 0.010$           | $\pm 0.079$                  | $\pm 0.016$                  |
| Subject11 | $\kappa$ | 0.218       | 0.194       | 0.190       | 0.278       | 0.155       | 0.094               | 0.129               | 0.062                | 0.019                | <b>0.010</b>           | 0.022                  | 0.030                | 0.162                | 0.100                 | 0.006                 | 0.118                        | 0.011                        |
|           |          | $\pm 0.130$ | $\pm 0.130$ | $\pm 0.116$ | $\pm 0.153$ | $\pm 0.106$ | $\pm 0.057$         | $\pm 0.093$         | $\pm 0.045$          | $\pm 0.008$          | $\pm 0.011$            | $\pm 0.016$            | $\pm 0.031$          | $\pm 0.107$          | $\pm 0.052$           | $\pm 0.006$           | $\pm 0.059$                  | $\pm 0.010$                  |
|           | AUC      | 0.136       | 0.145       | 0.196       | 0.165       | 0.169       | 0.049               | 0.117               | 0.041                | 0.096                | 0.014                  | 0.098                  | 0.029                | 0.189                | 0.045                 | <b>0.027</b>          | 0.056                        | 0.066                        |
|           |          | $\pm 0.049$ | $\pm 0.045$ | $\pm 0.042$ | $\pm 0.046$ | $\pm 0.052$ | $\pm 0.017$         | $\pm 0.044$         | $\pm 0.027$          | $\pm 0.021$          | $\pm 0.013$            | $\pm 0.034$            | $\pm 0.014$          | $\pm 0.048$          | $\pm 0.016$           | $\pm 0.020$           | $\pm 0.024$                  | $\pm 0.031$                  |
|           | BAcc     | 0.213       | 0.189       | 0.185       | 0.271       | 0.151       | 0.091               | 0.125               | 0.061                | 0.019                | <b>0.009</b>           | 0.022                  | 0.029                | 0.158                | 0.098                 | 0.006                 | 0.115                        | 0.010                        |
|           |          | $\pm 0.127$ | $\pm 0.126$ | $\pm 0.113$ | $\pm 0.149$ | $\pm 0.103$ | $\pm 0.055$         | $\pm 0.091$         | $\pm 0.044$          | $\pm 0.008$          | $\pm 0.011$            | $\pm 0.016$            | $\pm 0.030$          | $\pm 0.104$          | $\pm 0.051$           | $\pm 0.006$           | $\pm 0.057$                  | $\pm 0.010$                  |
| Subject11 | Acc.1    | 0.213       | 0.189       | 0.185       | 0.272       | 0.151       | 0.091               | 0.124               | 0.061                | 0.019                | <b>0.009</b>           | 0.023                  | 0.029                | 0.159                | 0.098                 | 0.006                 | 0.116                        | 0.010                        |
|           |          | $\pm 0.127$ | $\pm 0.126$ | $\pm 0.113$ | $\pm 0.150$ | $\pm 0.103$ | $\pm 0.055$         | $\pm 0.090$         | $\pm 0.044$          | $\pm 0.008$          | $\pm 0.011$            | $\pm 0.016$            | $\pm 0.030$          | $\pm 0.104$          | $\pm 0.051$           | $\pm 0.006$           | $\pm 0.058$                  | $\pm 0.009$                  |
|           | Acc.2    | 0.269       | 0.251       | 0.252       | 0.344       | 0.211       | 0.122               | 0.206               | 0.073                | 0.033                | <b>0.016</b>           | 0.042                  | 0.037                | 0.228                | 0.113                 | 0.010                 | 0.138                        | 0.017                        |
|           |          | $\pm 0.137$ | $\pm 0.151$ | $\pm 0.130$ | $\pm 0.171$ | $\pm 0.128$ | $\pm 0.061$         | $\pm 0.138$         | $\pm 0.051$          | $\pm 0.013$          | $\pm 0.015$            | $\pm 0.024$            | $\pm 0.033$          | $\pm 0.131$          | $\pm 0.048$           | $\pm 0.009$           | $\pm 0.060$                  | $\pm 0.014$                  |

Continued on next page

| Subject   | Metric   | DeepConvnet          | EEGNet               | Conformer            | CTNet                | SSVEPDNN             | BIOT (f)             | BIOT (l)             | BENDR (f)            | BENDR (l)            | CBraMod (f)                 | CBraMod (l)          | EEGPT (f)                   | EEGPT (l)            | LaBraM (f)           | LaBraM (l)                  | STEEGformer-s (f)    | STEEGformer-s (l)    |
|-----------|----------|----------------------|----------------------|----------------------|----------------------|----------------------|----------------------|----------------------|----------------------|----------------------|-----------------------------|----------------------|-----------------------------|----------------------|----------------------|-----------------------------|----------------------|----------------------|
| Subject12 | $\kappa$ | 0.264<br>$\pm 0.157$ | 0.249<br>$\pm 0.159$ | 0.210<br>$\pm 0.135$ | 0.329<br>$\pm 0.185$ | 0.174<br>$\pm 0.116$ | 0.197<br>$\pm 0.125$ | 0.196<br>$\pm 0.143$ | 0.153<br>$\pm 0.086$ | 0.016<br>$\pm 0.010$ | <b>0.011</b><br>$\pm 0.011$ | 0.019<br>$\pm 0.015$ | 0.052<br>$\pm 0.047$        | 0.185<br>$\pm 0.123$ | 0.192<br>$\pm 0.106$ | 0.006<br>$\pm 0.005$        | 0.234<br>$\pm 0.136$ | 0.014<br>$\pm 0.011$ |
|           | AUC      | 0.220<br>$\pm 0.057$ | 0.239<br>$\pm 0.068$ | 0.229<br>$\pm 0.062$ | 0.243<br>$\pm 0.064$ | 0.212<br>$\pm 0.068$ | 0.148<br>$\pm 0.059$ | 0.219<br>$\pm 0.086$ | 0.110<br>$\pm 0.034$ | 0.083<br>$\pm 0.022$ | 0.018<br>$\pm 0.012$        | 0.091<br>$\pm 0.032$ | 0.057<br>$\pm 0.033$        | 0.229<br>$\pm 0.075$ | 0.106<br>$\pm 0.029$ | <b>0.033</b><br>$\pm 0.018$ | 0.166<br>$\pm 0.053$ | 0.077<br>$\pm 0.029$ |
|           | BAcc     | 0.257<br>$\pm 0.153$ | 0.243<br>$\pm 0.155$ | 0.205<br>$\pm 0.132$ | 0.321<br>$\pm 0.180$ | 0.170<br>$\pm 0.113$ | 0.192<br>$\pm 0.121$ | 0.191<br>$\pm 0.140$ | 0.149<br>$\pm 0.084$ | 0.016<br>$\pm 0.010$ | <b>0.011</b><br>$\pm 0.011$ | 0.019<br>$\pm 0.015$ | 0.050<br>$\pm 0.046$        | 0.181<br>$\pm 0.120$ | 0.188<br>$\pm 0.103$ | 0.005<br>$\pm 0.005$        | 0.228<br>$\pm 0.133$ | 0.014<br>$\pm 0.011$ |
|           | Acc.1    | 0.258<br>$\pm 0.152$ | 0.243<br>$\pm 0.154$ | 0.206<br>$\pm 0.132$ | 0.321<br>$\pm 0.179$ | 0.170<br>$\pm 0.113$ | 0.192<br>$\pm 0.121$ | 0.191<br>$\pm 0.140$ | 0.149<br>$\pm 0.084$ | 0.016<br>$\pm 0.010$ | <b>0.011</b><br>$\pm 0.011$ | 0.020<br>$\pm 0.016$ | 0.050<br>$\pm 0.046$        | 0.181<br>$\pm 0.119$ | 0.187<br>$\pm 0.102$ | 0.006<br>$\pm 0.005$        | 0.227<br>$\pm 0.132$ | 0.014<br>$\pm 0.011$ |
|           | Acc.2    | 0.341<br>$\pm 0.175$ | 0.334<br>$\pm 0.188$ | 0.288<br>$\pm 0.164$ | 0.423<br>$\pm 0.210$ | 0.241<br>$\pm 0.146$ | 0.270<br>$\pm 0.150$ | 0.301<br>$\pm 0.201$ | 0.186<br>$\pm 0.094$ | 0.027<br>$\pm 0.015$ | <b>0.019</b><br>$\pm 0.016$ | 0.034<br>$\pm 0.022$ | 0.068<br>$\pm 0.058$        | 0.264<br>$\pm 0.155$ | 0.227<br>$\pm 0.103$ | 0.011<br>$\pm 0.010$        | 0.283<br>$\pm 0.140$ | 0.024<br>$\pm 0.017$ |
| Subject13 | $\kappa$ | 0.199<br>$\pm 0.118$ | 0.184<br>$\pm 0.110$ | 0.129<br>$\pm 0.085$ | 0.259<br>$\pm 0.144$ | 0.142<br>$\pm 0.085$ | 0.080<br>$\pm 0.047$ | 0.112<br>$\pm 0.072$ | 0.054<br>$\pm 0.048$ | 0.012<br>$\pm 0.005$ | 0.009<br>$\pm 0.017$        | 0.019<br>$\pm 0.016$ | <b>0.009</b><br>$\pm 0.013$ | 0.117<br>$\pm 0.069$ | 0.068<br>$\pm 0.049$ | 0.008<br>$\pm 0.007$        | 0.099<br>$\pm 0.064$ | 0.009<br>$\pm 0.010$ |
|           | AUC      | 0.129<br>$\pm 0.062$ | 0.148<br>$\pm 0.051$ | 0.121<br>$\pm 0.054$ | 0.162<br>$\pm 0.057$ | 0.164<br>$\pm 0.047$ | 0.048<br>$\pm 0.020$ | 0.100<br>$\pm 0.042$ | 0.039<br>$\pm 0.032$ | 0.075<br>$\pm 0.016$ | <b>0.010</b><br>$\pm 0.020$ | 0.071<br>$\pm 0.029$ | 0.005<br>$\pm 0.009$        | 0.101<br>$\pm 0.035$ | 0.032<br>$\pm 0.018$ | 0.032<br>$\pm 0.022$        | 0.047<br>$\pm 0.031$ | 0.045<br>$\pm 0.027$ |
|           | BAcc     | 0.194<br>$\pm 0.115$ | 0.179<br>$\pm 0.108$ | 0.126<br>$\pm 0.083$ | 0.253<br>$\pm 0.141$ | 0.138<br>$\pm 0.083$ | 0.078<br>$\pm 0.046$ | 0.109<br>$\pm 0.070$ | 0.052<br>$\pm 0.047$ | 0.012<br>$\pm 0.005$ | 0.009<br>$\pm 0.017$        | 0.019<br>$\pm 0.015$ | <b>0.008</b><br>$\pm 0.013$ | 0.114<br>$\pm 0.067$ | 0.066<br>$\pm 0.048$ | 0.007<br>$\pm 0.007$        | 0.096<br>$\pm 0.063$ | 0.009<br>$\pm 0.010$ |
|           | Acc.1    | 0.194<br>$\pm 0.115$ | 0.179<br>$\pm 0.108$ | 0.126<br>$\pm 0.083$ | 0.253<br>$\pm 0.141$ | 0.138<br>$\pm 0.083$ | 0.079<br>$\pm 0.046$ | 0.109<br>$\pm 0.070$ | 0.053<br>$\pm 0.047$ | 0.012<br>$\pm 0.005$ | 0.010<br>$\pm 0.017$        | 0.020<br>$\pm 0.016$ | <b>0.008</b><br>$\pm 0.013$ | 0.114<br>$\pm 0.067$ | 0.067<br>$\pm 0.048$ | 0.008<br>$\pm 0.007$        | 0.097<br>$\pm 0.062$ | 0.009<br>$\pm 0.010$ |
|           | Acc.2    | 0.250<br>$\pm 0.134$ | 0.243<br>$\pm 0.130$ | 0.176<br>$\pm 0.102$ | 0.326<br>$\pm 0.164$ | 0.194<br>$\pm 0.101$ | 0.110<br>$\pm 0.056$ | 0.174<br>$\pm 0.103$ | 0.064<br>$\pm 0.058$ | 0.025<br>$\pm 0.009$ | 0.016<br>$\pm 0.021$        | 0.034<br>$\pm 0.024$ | 0.010<br>$\pm 0.015$        | 0.161<br>$\pm 0.080$ | 0.075<br>$\pm 0.049$ | <b>0.013</b><br>$\pm 0.011$ | 0.113<br>$\pm 0.066$ | 0.016<br>$\pm 0.015$ |
| Subject14 | $\kappa$ | 0.174<br>$\pm 0.124$ | 0.141<br>$\pm 0.087$ | 0.119<br>$\pm 0.091$ | 0.228<br>$\pm 0.128$ | 0.119<br>$\pm 0.080$ | 0.078<br>$\pm 0.061$ | 0.112<br>$\pm 0.080$ | 0.067<br>$\pm 0.062$ | 0.013<br>$\pm 0.009$ | 0.002<br>$\pm 0.011$        | 0.019<br>$\pm 0.015$ | 0.023<br>$\pm 0.029$        | 0.138<br>$\pm 0.094$ | 0.078<br>$\pm 0.051$ | <b>0.006</b><br>$\pm 0.006$ | 0.096<br>$\pm 0.073$ | 0.012<br>$\pm 0.013$ |
|           | AUC      | 0.112<br>$\pm 0.061$ | 0.105<br>$\pm 0.049$ | 0.105<br>$\pm 0.049$ | 0.126<br>$\pm 0.056$ | 0.135<br>$\pm 0.047$ | 0.038<br>$\pm 0.025$ | 0.110<br>$\pm 0.048$ | 0.046<br>$\pm 0.039$ | 0.082<br>$\pm 0.021$ | 0.002<br>$\pm 0.014$        | 0.077<br>$\pm 0.039$ | <b>0.020</b><br>$\pm 0.015$ | 0.124<br>$\pm 0.040$ | 0.042<br>$\pm 0.021$ | 0.022<br>$\pm 0.017$        | 0.043<br>$\pm 0.033$ | 0.050<br>$\pm 0.025$ |
|           | BAcc     | 0.169<br>$\pm 0.121$ | 0.137<br>$\pm 0.085$ | 0.116<br>$\pm 0.089$ | 0.222<br>$\pm 0.125$ | 0.116<br>$\pm 0.078$ | 0.076<br>$\pm 0.060$ | 0.109<br>$\pm 0.078$ | 0.065<br>$\pm 0.061$ | 0.013<br>$\pm 0.008$ | 0.002<br>$\pm 0.011$        | 0.019<br>$\pm 0.015$ | 0.022<br>$\pm 0.028$        | 0.135<br>$\pm 0.092$ | 0.076<br>$\pm 0.049$ | <b>0.006</b><br>$\pm 0.006$ | 0.094<br>$\pm 0.071$ | 0.011<br>$\pm 0.013$ |
|           | Acc.1    | 0.169<br>$\pm 0.121$ | 0.137<br>$\pm 0.085$ | 0.116<br>$\pm 0.089$ | 0.221<br>$\pm 0.124$ | 0.116<br>$\pm 0.078$ | 0.077<br>$\pm 0.060$ | 0.110<br>$\pm 0.078$ | 0.065<br>$\pm 0.060$ | 0.013<br>$\pm 0.009$ | 0.002<br>$\pm 0.011$        | 0.020<br>$\pm 0.015$ | 0.022<br>$\pm 0.028$        | 0.136<br>$\pm 0.091$ | 0.076<br>$\pm 0.049$ | <b>0.006</b><br>$\pm 0.006$ | 0.093<br>$\pm 0.070$ | 0.011<br>$\pm 0.013$ |
|           | Acc.2    | 0.217<br>$\pm 0.139$ | 0.181<br>$\pm 0.103$ | 0.156<br>$\pm 0.107$ | 0.283<br>$\pm 0.149$ | 0.162<br>$\pm 0.097$ | 0.095<br>$\pm 0.064$ | 0.177<br>$\pm 0.115$ | 0.080<br>$\pm 0.074$ | 0.025<br>$\pm 0.010$ | 0.005<br>$\pm 0.017$        | 0.033<br>$\pm 0.019$ | 0.029<br>$\pm 0.034$        | 0.190<br>$\pm 0.113$ | 0.090<br>$\pm 0.045$ | <b>0.009</b><br>$\pm 0.008$ | 0.107<br>$\pm 0.071$ | 0.020<br>$\pm 0.018$ |
| Subject15 | $\kappa$ | 0.159<br>$\pm 0.102$ | 0.150<br>$\pm 0.099$ | 0.143<br>$\pm 0.094$ | 0.245<br>$\pm 0.134$ | 0.127<br>$\pm 0.088$ | 0.091<br>$\pm 0.059$ | 0.122<br>$\pm 0.086$ | 0.049<br>$\pm 0.048$ | 0.013<br>$\pm 0.007$ | <b>0.011</b><br>$\pm 0.011$ | 0.022<br>$\pm 0.019$ | 0.015<br>$\pm 0.023$        | 0.151<br>$\pm 0.108$ | 0.087<br>$\pm 0.055$ | 0.008<br>$\pm 0.007$        | 0.093<br>$\pm 0.051$ | 0.015<br>$\pm 0.012$ |

Continued on next page

| Subject   | Metric   | DeepConvnet | EEGNet | Conformer | CTNet  | SSVEPDNN | BIOT (f) | BIOT (l) | BENDR (f) | BENDR (l) | CBraMod (f)      | CBraMod (l) | EEGPT (f)        | EEGPT (l) | LaBraM (f) | LaBraM (l)       | STEEGformer-s (f) | STEEGformer-s (l) |
|-----------|----------|-------------|--------|-----------|--------|----------|----------|----------|-----------|-----------|------------------|-------------|------------------|-----------|------------|------------------|-------------------|-------------------|
|           | AUC      | 0.110       | 0.105  | 0.135     | 0.138  | 0.150    | 0.050    | 0.121    | 0.035     | 0.077     | 0.016<br>± 0.013 | 0.101       | <b>0.017</b>     | 0.150     | 0.040      | 0.037            | 0.045             | 0.062             |
|           |          | ±0.052      | ±0.041 | ±0.043    | ±0.050 | ±0.049   | ±0.020   | ±0.045   | ±0.033    | ±0.018    | ±0.035           | ±0.035      | ±0.011           | ±0.044    | ±0.013     | ±0.020           | ±0.025            | ±0.030            |
|           | BAcc     | 0.155       | 0.146  | 0.139     | 0.239  | 0.124    | 0.089    | 0.119    | 0.048     | 0.013     | <b>0.011</b>     | 0.022       | 0.015            | 0.148     | 0.085      | 0.008<br>± 0.006 | 0.091             | 0.015             |
|           |          | ±0.099      | ±0.097 | ±0.092    | ±0.130 | ±0.086   | ±0.057   | ±0.084   | ±0.047    | ±0.007    | ±0.011           | ±0.018      | ±0.022           | ±0.105    | ±0.053     | ±0.050           | ±0.050            | ±0.012            |
|           | Acc.1    | 0.155       | 0.146  | 0.139     | 0.239  | 0.124    | 0.088    | 0.118    | 0.047     | 0.013     | <b>0.010</b>     | 0.023       | 0.014            | 0.148     | 0.084      | 0.008<br>± 0.006 | 0.091             | 0.015             |
|           |          | ±0.099      | ±0.097 | ±0.091    | ±0.130 | ±0.086   | ±0.057   | ±0.084   | ±0.047    | ±0.007    | ±0.011           | ±0.018      | ±0.022           | ±0.105    | ±0.053     | ±0.049           | ±0.012            | ±0.012            |
|           | Acc.2    | 0.196       | 0.189  | 0.186     | 0.305  | 0.172    | 0.123    | 0.192    | 0.059     | 0.025     | <b>0.018</b>     | 0.039       | 0.020            | 0.211     | 0.097      | 0.013<br>± 0.010 | 0.107             | 0.026             |
|           |          | ±0.112      | ±0.110 | ±0.107    | ±0.149 | ±0.109   | ±0.072   | ±0.119   | ±0.056    | ±0.009    | ±0.017           | ±0.030      | ±0.024           | ±0.134    | ±0.050     | ±0.054           | ±0.019            | ±0.019            |
|           | $\kappa$ | 0.138       | 0.181  | 0.137     | 0.253  | 0.116    | 0.085    | 0.131    | 0.047     | 0.011     | <b>0.009</b>     | 0.021       | 0.020            | 0.152     | 0.076      | 0.008<br>± 0.007 | 0.097             | 0.013             |
|           |          | ±0.093      | ±0.123 | ±0.095    | ±0.151 | ±0.087   | ±0.063   | ±0.093   | ±0.047    | ±0.009    | ±0.011           | ±0.015      | ±0.024           | ±0.106    | ±0.053     | ±0.060           | ±0.012            | ±0.012            |
| Subject16 | AUC      | 0.111       | 0.121  | 0.119     | 0.133  | 0.136    | 0.050    | 0.095    | 0.029     | 0.078     | 0.008<br>± 0.017 | 0.088       | <b>0.013</b>     | 0.149     | 0.024      | 0.032            | 0.043             | 0.062             |
|           |          | ±0.037      | ±0.040 | ±0.043    | ±0.045 | ±0.047   | ±0.025   | ±0.039   | ±0.032    | ±0.021    | ±0.035           | ±0.035      | ±0.013           | ±0.045    | ±0.016     | ±0.019           | ±0.023            | ±0.026            |
|           | BAcc     | 0.135       | 0.176  | 0.134     | 0.246  | 0.113    | 0.083    | 0.128    | 0.046     | 0.011     | <b>0.008</b>     | 0.021       | 0.020            | 0.148     | 0.074      | 0.008<br>± 0.007 | 0.095             | 0.013             |
|           |          | ±0.090      | ±0.120 | ±0.093    | ±0.147 | ±0.085   | ±0.062   | ±0.090   | ±0.046    | ±0.009    | ±0.011           | ±0.015      | ±0.024           | ±0.104    | ±0.052     | ±0.058           | ±0.011            | ±0.011            |
|           | Acc.1    | 0.135       | 0.176  | 0.134     | 0.246  | 0.113    | 0.083    | 0.127    | 0.045     | 0.011     | <b>0.008</b>     | 0.022       | 0.020            | 0.148     | 0.074      | 0.008<br>± 0.007 | 0.093             | 0.013             |
|           |          | ±0.090      | ±0.120 | ±0.093    | ±0.147 | ±0.085   | ±0.062   | ±0.090   | ±0.046    | ±0.009    | ±0.011           | ±0.015      | ±0.024           | ±0.103    | ±0.051     | ±0.057           | ±0.011            | ±0.011            |
|           | Acc.2    | 0.175       | 0.230  | 0.183     | 0.313  | 0.157    | 0.105    | 0.195    | 0.051     | 0.020     | <b>0.013</b>     | 0.041       | 0.025            | 0.210     | 0.079      | 0.012<br>± 0.010 | 0.107             | 0.023             |
|           |          | ±0.101      | ±0.140 | ±0.109    | ±0.164 | ±0.105   | ±0.067   | ±0.123   | ±0.054    | ±0.013    | ±0.017           | ±0.023      | ±0.029           | ±0.129    | ±0.047     | ±0.059           | ±0.014            | ±0.014            |
|           | $\kappa$ | 0.147       | 0.156  | 0.134     | 0.242  | 0.108    | 0.073    | 0.104    | 0.041     | 0.014     | <b>0.011</b>     | 0.015       | 0.016            | 0.149     | 0.071      | 0.005<br>± 0.006 | 0.078             | 0.013             |
|           |          | ±0.089      | ±0.098 | ±0.091    | ±0.134 | ±0.078   | ±0.049   | ±0.069   | ±0.038    | ±0.010    | ±0.011           | ±0.014      | ±0.021           | ±0.097    | ±0.041     | ±0.049           | ±0.012            | ±0.012            |
| Subject17 | AUC      | 0.143       | 0.112  | 0.123     | 0.131  | 0.123    | 0.045    | 0.099    | 0.029     | 0.077     | <b>0.018</b>     | 0.080       | 0.009<br>± 0.011 | 0.152     | 0.032      | 0.032            | 0.033             | 0.060             |
|           |          | ±0.045      | ±0.045 | ±0.037    | ±0.044 | ±0.041   | ±0.014   | ±0.037   | ±0.024    | ±0.020    | ±0.012           | ±0.034      | ±0.033           | ±0.020    | ±0.021     | ±0.021           | ±0.021            | ±0.031            |
|           | BAcc     | 0.144       | 0.152  | 0.131     | 0.236  | 0.105    | 0.071    | 0.102    | 0.040     | 0.014     | <b>0.011</b>     | 0.015       | 0.015            | 0.145     | 0.069      | 0.005<br>± 0.006 | 0.076             | 0.012             |
|           |          | ±0.086      | ±0.096 | ±0.089    | ±0.131 | ±0.076   | ±0.047   | ±0.068   | ±0.037    | ±0.010    | ±0.010           | ±0.013      | ±0.021           | ±0.094    | ±0.040     | ±0.048           | ±0.011            | ±0.011            |
|           | Acc.1    | 0.144       | 0.152  | 0.131     | 0.235  | 0.105    | 0.070    | 0.101    | 0.041     | 0.014     | <b>0.011</b>     | 0.015       | 0.015            | 0.145     | 0.070      | 0.005<br>± 0.006 | 0.076             | 0.012             |
|           |          | ±0.086      | ±0.096 | ±0.088    | ±0.130 | ±0.076   | ±0.047   | ±0.067   | ±0.037    | ±0.010    | ±0.011           | ±0.013      | ±0.021           | ±0.094    | ±0.040     | ±0.047           | ±0.011            | ±0.011            |
|           | Acc.2    | 0.190       | 0.194  | 0.176     | 0.296  | 0.148    | 0.095    | 0.166    | 0.050     | 0.025     | 0.018            | 0.031       | <b>0.018</b>     | 0.204     | 0.081      | 0.008<br>± 0.009 | 0.091             | 0.019             |
|           |          | ±0.100      | ±0.109 | ±0.098    | ±0.145 | ±0.093   | ±0.054   | ±0.097   | ±0.047    | ±0.014    | ±0.014           | ±0.022      | ±0.022           | ±0.116    | ±0.039     | ±0.051           | ±0.017            | ±0.017            |
|           | $\kappa$ | 0.206       | 0.166  | 0.135     | 0.235  | 0.136    | 0.078    | 0.126    | 0.034     | 0.014     | <b>0.008</b>     | 0.017       | 0.017            | 0.163     | 0.054      | 0.005<br>± 0.007 | 0.093             | 0.013             |
|           |          | ±0.127      | ±0.109 | ±0.095    | ±0.128 | ±0.102   | ±0.048   | ±0.086   | ±0.030    | ±0.006    | ±0.012           | ±0.014      | ±0.023           | ±0.109    | ±0.029     | ±0.053           | ±0.012            | ±0.012            |
| Subject18 | AUC      | 0.114       | 0.115  | 0.114     | 0.120  | 0.164    | 0.045    | 0.128    | 0.022     | 0.080     | 0.016<br>± 0.012 | 0.078       | <b>0.017</b>     | 0.161     | 0.033      | 0.022            | 0.043             | 0.045             |
|           |          | ±0.040      | ±0.033 | ±0.048    | ±0.040 | ±0.058   | ±0.017   | ±0.050   | ±0.017    | ±0.019    | ±0.031           | ±0.031      | ±0.013           | ±0.046    | ±0.014     | ±0.019           | ±0.020            | ±0.022            |

Continued on next page

|           |          |             |             |             |             |             |                     |                     |                      |                      |                        |                        |                      |                      |                       |                       |                              |                              | 9972  |
|-----------|----------|-------------|-------------|-------------|-------------|-------------|---------------------|---------------------|----------------------|----------------------|------------------------|------------------------|----------------------|----------------------|-----------------------|-----------------------|------------------------------|------------------------------|-------|
|           |          |             |             |             |             |             |                     |                     |                      |                      |                        |                        |                      |                      |                       |                       |                              |                              | 9973  |
|           |          |             |             |             |             |             |                     |                     |                      |                      |                        |                        |                      |                      |                       |                       |                              |                              | 9974  |
|           |          |             |             |             |             |             |                     |                     |                      |                      |                        |                        |                      |                      |                       |                       |                              |                              | 9975  |
|           |          |             |             |             |             |             |                     |                     |                      |                      |                        |                        |                      |                      |                       |                       |                              |                              | 9976  |
|           |          |             |             |             |             |             |                     |                     |                      |                      |                        |                        |                      |                      |                       |                       |                              |                              | 9977  |
|           |          |             |             |             |             |             |                     |                     |                      |                      |                        |                        |                      |                      |                       |                       |                              |                              | 9978  |
|           |          |             |             |             |             |             |                     |                     |                      |                      |                        |                        |                      |                      |                       |                       |                              |                              | 9979  |
|           |          |             |             |             |             |             |                     |                     |                      |                      |                        |                        |                      |                      |                       |                       |                              |                              | 9980  |
|           |          |             |             |             |             |             |                     |                     |                      |                      |                        |                        |                      |                      |                       |                       |                              |                              | 9981  |
|           |          |             |             |             |             |             |                     |                     |                      |                      |                        |                        |                      |                      |                       |                       |                              |                              | 9982  |
|           |          |             |             |             |             |             |                     |                     |                      |                      |                        |                        |                      |                      |                       |                       |                              |                              | 9983  |
|           |          |             |             |             |             |             |                     |                     |                      |                      |                        |                        |                      |                      |                       |                       |                              |                              | 9984  |
|           |          |             |             |             |             |             |                     |                     |                      |                      |                        |                        |                      |                      |                       |                       |                              |                              | 9985  |
|           |          |             |             |             |             |             |                     |                     |                      |                      |                        |                        |                      |                      |                       |                       |                              |                              | 9986  |
|           |          |             |             |             |             |             |                     |                     |                      |                      |                        |                        |                      |                      |                       |                       |                              |                              | 9987  |
|           |          |             |             |             |             |             |                     |                     |                      |                      |                        |                        |                      |                      |                       |                       |                              |                              | 9988  |
|           |          |             |             |             |             |             |                     |                     |                      |                      |                        |                        |                      |                      |                       |                       |                              |                              | 9989  |
|           |          |             |             |             |             |             |                     |                     |                      |                      |                        |                        |                      |                      |                       |                       |                              |                              | 9990  |
|           |          |             |             |             |             |             |                     |                     |                      |                      |                        |                        |                      |                      |                       |                       |                              |                              | 9991  |
|           |          |             |             |             |             |             |                     |                     |                      |                      |                        |                        |                      |                      |                       |                       |                              |                              | 9992  |
|           |          |             |             |             |             |             |                     |                     |                      |                      |                        |                        |                      |                      |                       |                       |                              |                              | 9993  |
|           |          |             |             |             |             |             |                     |                     |                      |                      |                        |                        |                      |                      |                       |                       |                              |                              | 9994  |
|           |          |             |             |             |             |             |                     |                     |                      |                      |                        |                        |                      |                      |                       |                       |                              |                              | 9995  |
|           |          |             |             |             |             |             |                     |                     |                      |                      |                        |                        |                      |                      |                       |                       |                              |                              | 9996  |
|           |          |             |             |             |             |             |                     |                     |                      |                      |                        |                        |                      |                      |                       |                       |                              |                              | 9997  |
|           |          |             |             |             |             |             |                     |                     |                      |                      |                        |                        |                      |                      |                       |                       |                              |                              | 9998  |
|           |          |             |             |             |             |             |                     |                     |                      |                      |                        |                        |                      |                      |                       |                       |                              |                              | 9999  |
|           |          |             |             |             |             |             |                     |                     |                      |                      |                        |                        |                      |                      |                       |                       |                              |                              | 10000 |
|           |          |             |             |             |             |             |                     |                     |                      |                      |                        |                        |                      |                      |                       |                       |                              |                              | 10001 |
|           |          |             |             |             |             |             |                     |                     |                      |                      |                        |                        |                      |                      |                       |                       |                              |                              | 10002 |
|           |          |             |             |             |             |             |                     |                     |                      |                      |                        |                        |                      |                      |                       |                       |                              |                              | 10003 |
|           |          |             |             |             |             |             |                     |                     |                      |                      |                        |                        |                      |                      |                       |                       |                              |                              | 10004 |
| Subject   | Metric   | DeepConvnet | EEGNet      | Conformer   | CTNet       | SSVEPDNN    | BIOT <sup>(i)</sup> | BIOT <sup>(i)</sup> | BENDR <sup>(i)</sup> | BENDR <sup>(i)</sup> | CBraMod <sup>(i)</sup> | CBraMod <sup>(i)</sup> | EEGPT <sup>(i)</sup> | EEGPT <sup>(i)</sup> | LaBraM <sup>(i)</sup> | LaBraM <sup>(i)</sup> | STEEGformer-s <sup>(i)</sup> | STEEGformer-s <sup>(i)</sup> |       |
| Subject1  | BAcc     | 0.201       | 0.162       | 0.132       | 0.229       | 0.133       | 0.076               | 0.123               | 0.033                | 0.014                | <b>0.008</b>           | 0.016                  | 0.016                | 0.159                | 0.053                 | 0.005                 | 0.090                        | 0.012                        |       |
|           |          | $\pm 0.123$ | $\pm 0.106$ | $\pm 0.093$ | $\pm 0.125$ | $\pm 0.100$ | $\pm 0.047$         | $\pm 0.084$         | $\pm 0.030$          | $\pm 0.006$          | $\pm 0.011$            | $\pm 0.013$            | $\pm 0.023$          | $\pm 0.106$          | $\pm 0.028$           | $\pm 0.007$           | $\pm 0.051$                  | $\pm 0.011$                  |       |
|           | Acc.1    | 0.201       | 0.162       | 0.132       | 0.229       | 0.133       | 0.075               | 0.121               | 0.032                | 0.014                | <b>0.007</b>           | 0.016                  | 0.016                | 0.158                | 0.051                 | 0.005                 | 0.088                        | 0.011                        |       |
|           |          | $\pm 0.123$ | $\pm 0.106$ | $\pm 0.093$ | $\pm 0.125$ | $\pm 0.100$ | $\pm 0.047$         | $\pm 0.083$         | $\pm 0.029$          | $\pm 0.006$          | $\pm 0.012$            | $\pm 0.013$            | $\pm 0.023$          | $\pm 0.106$          | $\pm 0.028$           | $\pm 0.007$           | $\pm 0.051$                  | $\pm 0.012$                  |       |
|           | Acc.2    | 0.256       | 0.209       | 0.172       | 0.290       | 0.187       | 0.088               | 0.193               | 0.036                | 0.028                | <b>0.011</b>           | 0.029                  | 0.021                | 0.226                | 0.062                 | 0.007                 | 0.102                        | 0.021                        |       |
|           |          | $\pm 0.133$ | $\pm 0.125$ | $\pm 0.101$ | $\pm 0.134$ | $\pm 0.124$ | $\pm 0.045$         | $\pm 0.122$         | $\pm 0.034$          | $\pm 0.010$          | $\pm 0.014$            | $\pm 0.019$            | $\pm 0.024$          | $\pm 0.135$          | $\pm 0.029$           | $\pm 0.010$           | $\pm 0.048$                  | $\pm 0.018$                  |       |
|           | $\kappa$ | 0.161       | 0.174       | 0.198       | 0.262       | 0.160       | 0.138               | 0.135               | 0.098                | 0.023                | 0.015                  | 0.022                  | 0.033                | 0.181                | 0.117                 | 0.006                 | 0.143                        | <b>0.014</b>                 |       |
|           |          | $\pm 0.100$ | $\pm 0.117$ | $\pm 0.131$ | $\pm 0.152$ | $\pm 0.113$ | $\pm 0.097$         | $\pm 0.099$         | $\pm 0.069$          | $\pm 0.014$          | $\pm 0.014$            | $\pm 0.014$            | $\pm 0.034$          | $\pm 0.120$          | $\pm 0.071$           | $\pm 0.005$           | $\pm 0.094$                  | $\pm 0.013$                  |       |
| Subject19 | AUC      | 0.107       | 0.126       | 0.199       | 0.132       | 0.179       | 0.084               | 0.133               | 0.058                | 0.089                | 0.021                  | 0.077                  | 0.035                | 0.207                | 0.058                 | <b>0.027</b>          | 0.077                        | 0.053                        |       |
|           |          | $\pm 0.038$ | $\pm 0.026$ | $\pm 0.049$ | $\pm 0.032$ | $\pm 0.063$ | $\pm 0.038$         | $\pm 0.048$         | $\pm 0.035$          | $\pm 0.024$          | $\pm 0.015$            | $\pm 0.033$            | $\pm 0.018$          | $\pm 0.061$          | $\pm 0.020$           | $\pm 0.019$           | $\pm 0.036$                  | $\pm 0.026$                  |       |
|           | BAcc     | 0.156       | 0.170       | 0.193       | 0.255       | 0.156       | 0.135               | 0.132               | 0.096                | 0.022                | 0.015                  | 0.022                  | 0.033                | 0.177                | 0.114                 | 0.006                 | 0.140                        | <b>0.013</b>                 |       |
|           |          | $\pm 0.098$ | $\pm 0.114$ | $\pm 0.127$ | $\pm 0.149$ | $\pm 0.111$ | $\pm 0.095$         | $\pm 0.096$         | $\pm 0.068$          | $\pm 0.013$          | $\pm 0.014$            | $\pm 0.014$            | $\pm 0.033$          | $\pm 0.117$          | $\pm 0.069$           | $\pm 0.005$           | $\pm 0.091$                  | $\pm 0.012$                  |       |
|           | Acc.1    | 0.156       | 0.170       | 0.193       | 0.255       | 0.156       | 0.134               | 0.131               | 0.096                | 0.023                | 0.015                  | 0.022                  | 0.033                | 0.177                | 0.114                 | 0.004                 | 0.139                        | <b>0.013</b>                 |       |
|           |          | $\pm 0.098$ | $\pm 0.114$ | $\pm 0.127$ | $\pm 0.148$ | $\pm 0.111$ | $\pm 0.094$         | $\pm 0.096$         | $\pm 0.068$          | $\pm 0.014$          | $\pm 0.013$            | $\pm 0.015$            | $\pm 0.033$          | $\pm 0.117$          | $\pm 0.069$           | $\pm 0.006$           | $\pm 0.091$                  | $\pm 0.012$                  |       |
|           | Acc.2    | 0.207       | 0.231       | 0.268       | 0.324       | 0.215       | 0.177               | 0.213               | 0.114                | 0.038                | <b>0.020</b>           | 0.036                  | 0.043                | 0.253                | 0.133                 | 0.006                 | 0.167                        | 0.022                        |       |
|           |          | $\pm 0.107$ | $\pm 0.137$ | $\pm 0.156$ | $\pm 0.164$ | $\pm 0.137$ | $\pm 0.106$         | $\pm 0.142$         | $\pm 0.075$          | $\pm 0.019$          | $\pm 0.018$            | $\pm 0.022$            | $\pm 0.037$          | $\pm 0.150$          | $\pm 0.064$           | $\pm 0.009$           | $\pm 0.095$                  | $\pm 0.019$                  |       |
| Subject2  | $\kappa$ | 0.184       | 0.205       | 0.204       | 0.296       | 0.169       | 0.092               | 0.140               | 0.101                | 0.016                | <b>0.009</b>           | 0.017                  | 0.031                | 0.169                | 0.111                 | 0.005                 | 0.134                        | 0.013                        |       |
|           |          | $\pm 0.109$ | $\pm 0.131$ | $\pm 0.130$ | $\pm 0.167$ | $\pm 0.119$ | $\pm 0.060$         | $\pm 0.103$         | $\pm 0.062$          | $\pm 0.008$          | $\pm 0.013$            | $\pm 0.016$            | $\pm 0.032$          | $\pm 0.108$          | $\pm 0.060$           | $\pm 0.007$           | $\pm 0.074$                  | $\pm 0.012$                  |       |
|           | AUC      | 0.172       | 0.183       | 0.226       | 0.180       | 0.194       | 0.049               | 0.141               | 0.064                | 0.089                | 0.016                  | 0.093                  | <b>0.030</b>         | 0.188                | 0.042                 | 0.031                 | 0.075                        | 0.056                        |       |
|           |          | $\pm 0.042$ | $\pm 0.051$ | $\pm 0.060$ | $\pm 0.050$ | $\pm 0.067$ | $\pm 0.018$         | $\pm 0.053$         | $\pm 0.028$          | $\pm 0.022$          | $\pm 0.019$            | $\pm 0.033$            | $\pm 0.019$          | $\pm 0.054$          | $\pm 0.021$           | $\pm 0.020$           | $\pm 0.032$                  | $\pm 0.027$                  |       |
|           | BAcc     | 0.180       | 0.199       | 0.199       | 0.288       | 0.165       | 0.090               | 0.137               | 0.098                | 0.016                | <b>0.009</b>           | 0.017                  | 0.030                | 0.165                | 0.108                 | 0.005                 | 0.130                        | 0.013                        |       |
|           |          | $\pm 0.106$ | $\pm 0.128$ | $\pm 0.127$ | $\pm 0.163$ | $\pm 0.116$ | $\pm 0.058$         | $\pm 0.101$         | $\pm 0.060$          | $\pm 0.008$          | $\pm 0.013$            | $\pm 0.016$            | $\pm 0.031$          | $\pm 0.105$          | $\pm 0.059$           | $\pm 0.007$           | $\pm 0.072$                  | $\pm 0.012$                  |       |
|           | Acc.1    | 0.180       | 0.199       | 0.199       | 0.288       | 0.165       | 0.090               | 0.137               | 0.098                | 0.016                | <b>0.009</b>           | 0.017                  | 0.030                | 0.164                | 0.108                 | 0.005                 | 0.131                        | 0.012                        |       |
|           |          | $\pm 0.106$ | $\pm 0.128$ | $\pm 0.127$ | $\pm 0.163$ | $\pm 0.116$ | $\pm 0.059$         | $\pm 0.100$         | $\pm 0.060$          | $\pm 0.008$          | $\pm 0.013$            | $\pm 0.016$            | $\pm 0.031$          | $\pm 0.105$          | $\pm 0.059$           | $\pm 0.007$           | $\pm 0.073$                  | $\pm 0.012$                  |       |
| Subject20 | Acc.2    | 0.237       | 0.275       | 0.275       | 0.373       | 0.232       | 0.121               | 0.217               | 0.119                | 0.027                | <b>0.016</b>           | 0.032                  | 0.039                | 0.236                | 0.126                 | 0.008                 | 0.161                        | 0.023                        |       |
|           |          | $\pm 0.123$ | $\pm 0.160$ | $\pm 0.157$ | $\pm 0.189$ | $\pm 0.147$ | $\pm 0.069$         | $\pm 0.143$         | $\pm 0.065$          | $\pm 0.012$          | $\pm 0.018$            | $\pm 0.026$            | $\pm 0.038$          | $\pm 0.136$          | $\pm 0.056$           | $\pm 0.009$           | $\pm 0.078$                  | $\pm 0.018$                  |       |
|           | $\kappa$ | 0.251       | 0.178       | 0.146       | 0.240       | 0.139       | 0.082               | 0.105               | 0.081                | 0.011                | <b>0.011</b>           | 0.019                  | 0.012                | 0.135                | 0.083                 | 0.005                 | 0.118                        | 0.012                        |       |
|           |          | $\pm 0.165$ | $\pm 0.111$ | $\pm 0.093$ | $\pm 0.134$ | $\pm 0.092$ | $\pm 0.052$         | $\pm 0.073$         | $\pm 0.063$          | $\pm 0.006$          | $\pm 0.016$            | $\pm 0.015$            | $\pm 0.017$          | $\pm 0.092$          | $\pm 0.056$           | $\pm 0.006$           | $\pm 0.083$                  | $\pm 0.013$                  |       |
|           | AUC      | 0.151       | 0.142       | 0.134       | 0.126       | 0.154       | 0.048               | 0.095               | 0.059                | 0.072                | <b>0.010</b>           | 0.078                  | 0.004                | 0.113                | 0.024                 | 0.025                 | 0.061                        | 0.046                        |       |
|           |          | $\pm 0.073$ | $\pm 0.051$ | $\pm 0.044$ | $\pm 0.046$ | $\pm 0.054$ | $\pm 0.020$         | $\pm 0.040$         | $\pm 0.036$          | $\pm 0.018$          | $\pm 0.015$            | $\pm 0.034$            | $\pm 0.012$          | $\pm 0.026$          | $\pm 0.021$           | $\pm 0.017$           | $\pm 0.033$                  | $\pm 0.025$                  |       |
|           | BAcc     | 0.244       | 0.173       | 0.142       | 0.234       | 0.136       | 0.080               | 0.102               | 0.079                | 0.011                | <b>0.010</b>           | 0.018                  | 0.012                | 0.131                | 0.081                 | 0.005                 | 0.115                        | 0.012                        |       |
|           |          | $\pm 0.160$ | $\pm 0.108$ | $\pm 0.091$ | $\pm 0.131$ | $\pm 0.089$ | $\pm 0.051$         | $\pm 0.071$         | $\pm 0.061$          | $\pm 0.006$          | $\pm 0.015$            | $\pm 0.015$            | $\pm 0.016$          | $\pm 0.090$          | $\pm 0.055$           | $\pm 0.006$           | $\pm 0.081$                  | $\pm 0.013$                  |       |

Continued on next page

Continued on next page

| Subject   | Metric   | DeepConvnet     | EEGNet          | Conformer       | CTNet           | SSVEPDNN        | BIOT <sup>(j)</sup> | BIOT <sup>(l)</sup> | BENDR <sup>(f)</sup> | BENDR <sup>(l)</sup> | CBraMod <sup>(j)</sup> | CBraMod <sup>(l)</sup> | EEGPT <sup>(f)</sup> | EEGPT <sup>(l)</sup> | LaBraM <sup>(f)</sup> | LaBraM <sup>(l)</sup> | STEEGformer-s <sup>(j)</sup> | STEEGformer-s <sup>(l)</sup> |       |
|-----------|----------|-----------------|-----------------|-----------------|-----------------|-----------------|---------------------|---------------------|----------------------|----------------------|------------------------|------------------------|----------------------|----------------------|-----------------------|-----------------------|------------------------------|------------------------------|-------|
|           |          |                 |                 |                 |                 |                 |                     |                     |                      |                      |                        |                        |                      |                      |                       |                       |                              |                              |       |
| Subject24 | Acc.2    | 0.404<br>±0.222 | 0.342<br>±0.190 | 0.288<br>±0.169 | 0.434<br>±0.217 | 0.240<br>±0.143 | 0.303<br>±0.167     | 0.314<br>±0.209     | 0.217<br>±0.108      | 0.036<br>±0.015      | 0.025<br>±0.019        | 0.045<br>±0.025        | 0.069<br>±0.058      | 0.262<br>±0.158      | 0.214<br>±0.089       | 0.009<br>±0.008       | 0.256<br>±0.115              | 0.021<br>±0.017              | 10038 |
|           | $\kappa$ | 0.241<br>±0.147 | 0.225<br>±0.146 | 0.203<br>±0.134 | 0.315<br>±0.172 | 0.179<br>±0.123 | 0.123<br>±0.078     | 0.144<br>±0.102     | 0.110<br>±0.067      | 0.014<br>±0.007      | 0.014<br>±0.014        | 0.019<br>±0.014        | 0.039<br>±0.037      | 0.172<br>±0.111      | 0.136<br>±0.083       | 0.006<br>±0.005       | 0.168<br>±0.094              | 0.011<br>±0.014              | 10039 |
|           | AUC      | 0.204<br>±0.056 | 0.206<br>±0.057 | 0.222<br>±0.065 | 0.208<br>±0.052 | 0.217<br>±0.071 | 0.066<br>±0.029     | 0.125<br>±0.049     | 0.078<br>±0.028      | 0.085<br>±0.018      | 0.024<br>±0.016        | 0.084<br>±0.034        | 0.039<br>±0.023      | 0.192<br>±0.058      | 0.063<br>±0.023       | 0.026<br>±0.021       | 0.095<br>±0.035              | 0.051<br>±0.028              | 10040 |
|           | BAcc     | 0.235<br>±0.143 | 0.220<br>±0.142 | 0.198<br>±0.131 | 0.307<br>±0.167 | 0.175<br>±0.120 | 0.119<br>±0.076     | 0.140<br>±0.100     | 0.108<br>±0.065      | 0.014<br>±0.007      | 0.014<br>±0.014        | 0.019<br>±0.014        | 0.038<br>±0.036      | 0.168<br>±0.108      | 0.132<br>±0.081       | 0.006<br>±0.005       | 0.164<br>±0.092              | 0.011<br>±0.013              | 10041 |
|           | Acc.1    | 0.235<br>±0.143 | 0.220<br>±0.142 | 0.198<br>±0.131 | 0.304<br>±0.166 | 0.175<br>±0.120 | 0.119<br>±0.076     | 0.139<br>±0.100     | 0.107<br>±0.065      | 0.014<br>±0.007      | 0.012<br>±0.014        | 0.018<br>±0.014        | 0.037<br>±0.036      | 0.167<br>±0.107      | 0.130<br>±0.080       | 0.006<br>±0.006       | 0.160<br>±0.090              | 0.010<br>±0.014              | 10042 |
|           | Acc.2    | 0.312<br>±0.172 | 0.305<br>±0.175 | 0.278<br>±0.165 | 0.397<br>±0.194 | 0.246<br>±0.150 | 0.166<br>±0.094     | 0.226<br>±0.150     | 0.133<br>±0.071      | 0.024<br>±0.011      | 0.019<br>±0.016        | 0.031<br>±0.022        | 0.050<br>±0.042      | 0.238<br>±0.139      | 0.154<br>±0.076       | 0.008<br>±0.009       | 0.188<br>±0.091              | 0.016<br>±0.021              | 10043 |
|           | $\kappa$ | 0.312<br>±0.188 | 0.244<br>±0.146 | 0.228<br>±0.146 | 0.334<br>±0.182 | 0.179<br>±0.115 | 0.176<br>±0.104     | 0.184<br>±0.126     | 0.146<br>±0.083      | 0.030<br>±0.013      | 0.025<br>±0.015        | 0.023<br>±0.014        | 0.051<br>±0.043      | 0.193<br>±0.129      | 0.161<br>±0.079       | 0.006<br>±0.006       | 0.172<br>±0.078              | 0.015<br>±0.013              | 10044 |
| Subject25 | AUC      | 0.253<br>±0.061 | 0.224<br>±0.048 | 0.272<br>±0.077 | 0.258<br>±0.057 | 0.249<br>±0.073 | 0.119<br>±0.045     | 0.215<br>±0.078     | 0.085<br>±0.025      | 0.132<br>±0.032      | 0.036<br>±0.016        | 0.096<br>±0.036        | 0.068<br>±0.027      | 0.248<br>±0.080      | 0.052<br>±0.023       | 0.031<br>±0.020       | 0.088<br>±0.033              | 0.071<br>±0.034              | 10045 |
|           | BAcc     | 0.304<br>±0.183 | 0.238<br>±0.142 | 0.222<br>±0.143 | 0.325<br>±0.177 | 0.175<br>±0.112 | 0.171<br>±0.101     | 0.179<br>±0.123     | 0.143<br>±0.081      | 0.029<br>±0.013      | 0.024<br>±0.015        | 0.023<br>±0.014        | 0.049<br>±0.042      | 0.189<br>±0.125      | 0.157<br>±0.077       | 0.006<br>±0.006       | 0.167<br>±0.076              | 0.014<br>±0.013              | 10046 |
|           | Acc.1    | 0.304<br>±0.183 | 0.238<br>±0.142 | 0.222<br>±0.143 | 0.326<br>±0.177 | 0.175<br>±0.112 | 0.172<br>±0.102     | 0.179<br>±0.123     | 0.143<br>±0.081      | 0.030<br>±0.013      | 0.025<br>±0.015        | 0.024<br>±0.014        | 0.050<br>±0.042      | 0.189<br>±0.125      | 0.159<br>±0.078       | 0.007<br>±0.006       | 0.169<br>±0.076              | 0.015<br>±0.013              | 10047 |
|           | Acc.2    | 0.408<br>±0.216 | 0.327<br>±0.174 | 0.316<br>±0.182 | 0.437<br>±0.209 | 0.250<br>±0.148 | 0.245<br>±0.133     | 0.285<br>±0.181     | 0.169<br>±0.082      | 0.052<br>±0.020      | 0.041<br>±0.021        | 0.040<br>±0.022        | 0.072<br>±0.052      | 0.276<br>±0.161      | 0.185<br>±0.072       | 0.011<br>±0.010       | 0.213<br>±0.085              | 0.026<br>±0.019              | 10048 |
|           | $\kappa$ | 0.195<br>±0.115 | 0.204<br>±0.129 | 0.177<br>±0.110 | 0.271<br>±0.149 | 0.147<br>±0.098 | 0.100<br>±0.059     | 0.143<br>±0.096     | 0.057<br>±0.052      | 0.015<br>±0.007      | 0.011<br>±0.011        | 0.016<br>±0.013        | 0.024<br>±0.022      | 0.162<br>±0.103      | 0.099<br>±0.060       | 0.005<br>±0.006       | 0.111<br>±0.068              | 0.011<br>±0.012              | 10049 |
| Subject26 | AUC      | 0.148<br>±0.044 | 0.149<br>±0.042 | 0.149<br>±0.042 | 0.150<br>±0.047 | 0.156<br>±0.056 | 0.075<br>±0.025     | 0.136<br>±0.055     | 0.038<br>±0.036      | 0.072<br>±0.017      | 0.013<br>±0.012        | 0.060<br>±0.029        | 0.021<br>±0.013      | 0.161<br>±0.042      | 0.037<br>±0.023       | 0.025<br>±0.021       | 0.044<br>±0.028              | 0.054<br>±0.026              | 10050 |
|           | BAcc     | 0.191<br>±0.112 | 0.199<br>±0.125 | 0.173<br>±0.108 | 0.265<br>±0.145 | 0.144<br>±0.096 | 0.098<br>±0.057     | 0.140<br>±0.093     | 0.055<br>±0.051      | 0.015<br>±0.007      | 0.010<br>±0.011        | 0.016<br>±0.012        | 0.024<br>±0.022      | 0.158<br>±0.101      | 0.096<br>±0.059       | 0.005<br>±0.006       | 0.108<br>±0.066              | 0.011<br>±0.012              | 10051 |
|           | Acc.1    | 0.191<br>±0.112 | 0.199<br>±0.125 | 0.173<br>±0.108 | 0.265<br>±0.145 | 0.144<br>±0.096 | 0.099<br>±0.058     | 0.140<br>±0.093     | 0.055<br>±0.051      | 0.015<br>±0.007      | 0.011<br>±0.011        | 0.016<br>±0.013        | 0.024<br>±0.022      | 0.159<br>±0.101      | 0.096<br>±0.059       | 0.006<br>±0.006       | 0.108<br>±0.067              | 0.012<br>±0.011              | 10052 |
|           | Acc.2    | 0.246<br>±0.125 | 0.268<br>±0.153 | 0.235<br>±0.131 | 0.339<br>±0.168 | 0.198<br>±0.119 | 0.136<br>±0.072     | 0.221<br>±0.133     | 0.068<br>±0.064      | 0.025<br>±0.010      | 0.016<br>±0.012        | 0.026<br>±0.017        | 0.033<br>±0.024      | 0.226<br>±0.127      | 0.110<br>±0.059       | 0.009<br>±0.011       | 0.125<br>±0.068              | 0.023<br>±0.019              | 10053 |
|           | $\kappa$ | 0.191<br>±0.112 | 0.199<br>±0.125 | 0.173<br>±0.108 | 0.265<br>±0.145 | 0.144<br>±0.096 | 0.099<br>±0.058     | 0.140<br>±0.093     | 0.055<br>±0.051      | 0.015<br>±0.007      | 0.011<br>±0.011        | 0.016<br>±0.013        | 0.024<br>±0.022      | 0.159<br>±0.101      | 0.096<br>±0.059       | 0.006<br>±0.006       | 0.108<br>±0.067              | 0.012<br>±0.011              | 10054 |

Continued on next page



|           |          | 10071                | 10072                | 10073                | 10074                | 10075                | 10076                | 10077                | 10078                              | 10079                | 10080                                         | 10081                | 10082                              | 10083                | 10084                | 10085                                         | 10086                | 10087                              | 10088                  | 10089 | 10090 | 10091 | 10092 | 10093 | 10094 | 10095 | 10096 | 10097 | 10098 | 10099 | 10100 | 10101 | 10102 | 10103 |  |  |  |  |
|-----------|----------|----------------------|----------------------|----------------------|----------------------|----------------------|----------------------|----------------------|------------------------------------|----------------------|-----------------------------------------------|----------------------|------------------------------------|----------------------|----------------------|-----------------------------------------------|----------------------|------------------------------------|------------------------|-------|-------|-------|-------|-------|-------|-------|-------|-------|-------|-------|-------|-------|-------|-------|--|--|--|--|
| Subject   | Metric   | DeepConvnet          | EEGNet               | Conformer            | CTNet                | SSVEPDNN             | BIOT (f)             | BIOT (l)             | BENDR (f)                          | BENDR (l)            | CBraMod (f)                                   | CBraMod (l)          | EEGPT (f)                          | EEGPT (l)            | LaBraM (f)           | LaBraM (l)                                    | STEEGformer-s (f)    | STEEGformer-s (l)                  |                        |       |       |       |       |       |       |       |       |       |       |       |       |       |       |       |  |  |  |  |
| Subject27 | $\kappa$ | 0.238<br>$\pm 0.150$ | 0.176<br>$\pm 0.114$ | 0.179<br>$\pm 0.115$ | 0.266<br>$\pm 0.149$ | 0.154<br>$\pm 0.106$ | 0.128<br>$\pm 0.079$ | 0.135<br>$\pm 0.095$ | 0.051<br>$\pm 0.047$               | 0.014<br>$\pm 0.007$ | <b>0.010</b><br>$\pm$ <b>0.013</b>            | 0.018<br>$\pm 0.016$ | 0.037<br>$\pm 0.036$               | 0.169<br>$\pm 0.112$ | 0.112<br>$\pm 0.068$ | <span>0.007<br/><math>\pm</math> 0.006</span> | 0.158<br>$\pm 0.094$ | 0.013<br>$\pm 0.013$               |                        |       |       |       |       |       |       |       |       |       |       |       |       |       |       |       |  |  |  |  |
|           | AUC      | 0.135<br>$\pm 0.042$ | 0.134<br>$\pm 0.034$ | 0.161<br>$\pm 0.045$ | 0.154<br>$\pm 0.045$ | 0.171<br>$\pm 0.053$ | 0.071<br>$\pm 0.031$ | 0.133<br>$\pm 0.049$ | <b>0.033</b><br>$\pm$ <b>0.033</b> | 0.078<br>$\pm 0.021$ | <span>0.014<br/><math>\pm</math> 0.017</span> | 0.080<br>$\pm 0.036$ | 0.035<br>$\pm 0.020$               | 0.173<br>$\pm 0.048$ | 0.053<br>$\pm 0.021$ | <span>0.037<br/><math>\pm</math> 0.025</span> | 0.080<br>$\pm 0.033$ | 0.076<br>$\pm 0.035$               |                        |       |       |       |       |       |       |       |       |       |       |       |       |       |       |       |  |  |  |  |
|           | BAcc     | 0.232<br>$\pm 0.146$ | 0.171<br>$\pm 0.111$ | 0.174<br>$\pm 0.112$ | 0.260<br>$\pm 0.145$ | 0.150<br>$\pm 0.103$ | 0.124<br>$\pm 0.077$ | 0.131<br>$\pm 0.093$ | 0.050<br>$\pm 0.045$               | 0.013<br>$\pm 0.007$ | <b>0.009</b><br>$\pm$ <b>0.012</b>            | 0.018<br>$\pm 0.015$ | 0.036<br>$\pm 0.035$               | 0.164<br>$\pm 0.109$ | 0.109<br>$\pm 0.067$ | <span>0.007<br/><math>\pm</math> 0.006</span> | 0.154<br>$\pm 0.092$ | 0.013<br>$\pm 0.012$               |                        |       |       |       |       |       |       |       |       |       |       |       |       |       |       |       |  |  |  |  |
|           | Acc.1    | 0.232<br>$\pm 0.146$ | 0.171<br>$\pm 0.111$ | 0.174<br>$\pm 0.112$ | 0.261<br>$\pm 0.145$ | 0.150<br>$\pm 0.103$ | 0.125<br>$\pm 0.078$ | 0.131<br>$\pm 0.093$ | 0.050<br>$\pm 0.045$               | 0.013<br>$\pm 0.007$ | <b>0.009</b><br>$\pm$ <b>0.012</b>            | 0.019<br>$\pm 0.016$ | 0.036<br>$\pm 0.035$               | 0.165<br>$\pm 0.109$ | 0.108<br>$\pm 0.066$ | <span>0.007<br/><math>\pm</math> 0.006</span> | 0.155<br>$\pm 0.092$ | 0.011<br>$\pm 0.012$               |                        |       |       |       |       |       |       |       |       |       |       |       |       |       |       |       |  |  |  |  |
|           | Acc.2    | 0.287<br>$\pm 0.155$ | 0.231<br>$\pm 0.132$ | 0.240<br>$\pm 0.134$ | 0.327<br>$\pm 0.160$ | 0.209<br>$\pm 0.127$ | 0.171<br>$\pm 0.093$ | 0.209<br>$\pm 0.132$ | 0.056<br>$\pm 0.055$               | 0.024<br>$\pm 0.012$ | <b>0.016</b><br>$\pm$ <b>0.019</b>            | 0.032<br>$\pm 0.025$ | 0.049<br>$\pm 0.040$               | 0.234<br>$\pm 0.138$ | 0.124<br>$\pm 0.062$ | <span>0.013<br/><math>\pm</math> 0.011</span> | 0.183<br>$\pm 0.094$ | 0.020<br>$\pm 0.019$               |                        |       |       |       |       |       |       |       |       |       |       |       |       |       |       |       |  |  |  |  |
| Subject28 | $\kappa$ | 0.204<br>$\pm 0.122$ | 0.225<br>$\pm 0.142$ | 0.209<br>$\pm 0.137$ | 0.308<br>$\pm 0.175$ | 0.173<br>$\pm 0.119$ | 0.133<br>$\pm 0.086$ | 0.157<br>$\pm 0.107$ | 0.100<br>$\pm 0.060$               | 0.018<br>$\pm 0.010$ | <b>0.011</b><br>$\pm$ <b>0.013</b>            | 0.020<br>$\pm 0.013$ | 0.030<br>$\pm 0.031$               | 0.173<br>$\pm 0.112$ | 0.130<br>$\pm 0.073$ | <span>0.007<br/><math>\pm</math> 0.009</span> | 0.154<br>$\pm 0.082$ | 0.016<br>$\pm 0.014$               |                        |       |       |       |       |       |       |       |       |       |       |       |       |       |       |       |  |  |  |  |
|           | AUC      | 0.189<br>$\pm 0.043$ | 0.184<br>$\pm 0.048$ | 0.223<br>$\pm 0.052$ | 0.205<br>$\pm 0.051$ | 0.195<br>$\pm 0.062$ | 0.075<br>$\pm 0.028$ | 0.160<br>$\pm 0.054$ | 0.063<br>$\pm 0.025$               | 0.072<br>$\pm 0.021$ | <span>0.018<br/><math>\pm</math> 0.013</span> | 0.095<br>$\pm 0.023$ | <b>0.027</b><br>$\pm$ <b>0.017</b> | 0.184<br>$\pm 0.048$ | 0.061<br>$\pm 0.021$ | <span>0.031<br/><math>\pm</math> 0.019</span> | 0.089<br>$\pm 0.028$ | 0.056<br>$\pm 0.029$               |                        |       |       |       |       |       |       |       |       |       |       |       |       |       |       |       |  |  |  |  |
|           | BAcc     | 0.199<br>$\pm 0.119$ | 0.220<br>$\pm 0.139$ | 0.204<br>$\pm 0.133$ | 0.301<br>$\pm 0.171$ | 0.169<br>$\pm 0.116$ | 0.129<br>$\pm 0.084$ | 0.153<br>$\pm 0.104$ | 0.098<br>$\pm 0.059$               | 0.017<br>$\pm 0.010$ | <b>0.011</b><br>$\pm$ <b>0.012</b>            | 0.020<br>$\pm 0.012$ | 0.030<br>$\pm 0.030$               | 0.168<br>$\pm 0.109$ | 0.126<br>$\pm 0.071$ | <span>0.007<br/><math>\pm</math> 0.008</span> | 0.151<br>$\pm 0.080$ | 0.015<br>$\pm 0.013$               |                        |       |       |       |       |       |       |       |       |       |       |       |       |       |       |       |  |  |  |  |
|           | Acc.1    | 0.199<br>$\pm 0.119$ | 0.220<br>$\pm 0.139$ | 0.204<br>$\pm 0.133$ | 0.300<br>$\pm 0.170$ | 0.169<br>$\pm 0.116$ | 0.128<br>$\pm 0.083$ | 0.152<br>$\pm 0.104$ | 0.098<br>$\pm 0.058$               | 0.018<br>$\pm 0.010$ | <b>0.010</b><br>$\pm$ <b>0.012</b>            | 0.021<br>$\pm 0.013$ | 0.029<br>$\pm 0.029$               | 0.168<br>$\pm 0.109$ | 0.125<br>$\pm 0.069$ | <span>0.008<br/><math>\pm</math> 0.008</span> | 0.149<br>$\pm 0.079$ | 0.015<br>$\pm 0.014$               |                        |       |       |       |       |       |       |       |       |       |       |       |       |       |       |       |  |  |  |  |
|           | Acc.2    | 0.265<br>$\pm 0.137$ | 0.298<br>$\pm 0.170$ | 0.284<br>$\pm 0.166$ | 0.394<br>$\pm 0.200$ | 0.238<br>$\pm 0.148$ | 0.181<br>$\pm 0.101$ | 0.242<br>$\pm 0.151$ | 0.118<br>$\pm 0.065$               | 0.029<br>$\pm 0.013$ | <b>0.018</b><br>$\pm$ <b>0.015</b>            | 0.042<br>$\pm 0.024$ | 0.038<br>$\pm 0.034$               | 0.240<br>$\pm 0.138$ | 0.150<br>$\pm 0.068$ | <span>0.012<br/><math>\pm</math> 0.010</span> | 0.187<br>$\pm 0.081$ | 0.026<br>$\pm 0.018$               |                        |       |       |       |       |       |       |       |       |       |       |       |       |       |       |       |  |  |  |  |
| Subject29 | $\kappa$ | 0.224<br>$\pm 0.128$ | 0.221<br>$\pm 0.134$ | 0.203<br>$\pm 0.129$ | 0.325<br>$\pm 0.177$ | 0.188<br>$\pm 0.126$ | 0.118<br>$\pm 0.063$ | 0.169<br>$\pm 0.120$ | 0.089<br>$\pm 0.051$               | 0.020<br>$\pm 0.010$ | 0.020<br>$\pm 0.011$                          | 0.018<br>$\pm 0.016$ | 0.044<br>$\pm 0.039$               | 0.177<br>$\pm 0.122$ | 0.110<br>$\pm 0.051$ | <span>0.007<br/><math>\pm</math> 0.007</span> | 0.130<br>$\pm 0.058$ | <b>0.013</b><br>$\pm$ <b>0.013</b> |                        |       |       |       |       |       |       |       |       |       |       |       |       |       |       |       |  |  |  |  |
|           | AUC      | 0.192<br>$\pm 0.042$ | 0.197<br>$\pm 0.042$ | 0.217<br>$\pm 0.054$ | 0.244<br>$\pm 0.060$ | 0.234<br>$\pm 0.066$ | 0.089<br>$\pm 0.025$ | 0.163<br>$\pm 0.056$ | 0.060<br>$\pm 0.021$               | 0.102<br>$\pm 0.026$ | <span>0.027<br/><math>\pm</math> 0.015</span> | 0.095<br>$\pm 0.036$ | 0.050<br>$\pm 0.023$               | 0.201<br>$\pm 0.072$ | 0.036<br>$\pm 0.015$ | <b>0.034</b><br>$\pm$ <b>0.019</b>            | 0.080<br>$\pm 0.020$ | 0.072<br>$\pm 0.036$               |                        |       |       |       |       |       |       |       |       |       |       |       |       |       |       |       |  |  |  |  |
|           | BAcc     | 0.218<br>$\pm 0.125$ | 0.216<br>$\pm 0.131$ | 0.198<br>$\pm 0.125$ | 0.317<br>$\pm 0.172$ | 0.183<br>$\pm 0.123$ | 0.115<br>$\pm 0.061$ | 0.165<br>$\pm 0.117$ | 0.086<br>$\pm 0.050$               | 0.020<br>$\pm 0.009$ | 0.019<br>$\pm 0.011$                          | 0.017<br>$\pm 0.015$ | 0.043<br>$\pm 0.038$               | 0.173<br>$\pm 0.119$ | 0.108<br>$\pm 0.050$ | <span>0.006<br/><math>\pm</math> 0.007</span> | 0.126<br>$\pm 0.057$ | <b>0.013</b><br>$\pm$ <b>0.013</b> |                        |       |       |       |       |       |       |       |       |       |       |       |       |       |       |       |  |  |  |  |
|           | Acc.1    | 0.218<br>$\pm 0.125$ | 0.216<br>$\pm 0.131$ | 0.198<br>$\pm 0.125$ | 0.318<br>$\pm 0.172$ | 0.183<br>$\pm 0.123$ | 0.115<br>$\pm 0.061$ | 0.164<br>$\pm 0.117$ | 0.086<br>$\pm 0.050$               | 0.020<br>$\pm 0.009$ | 0.019<br>$\pm 0.011$                          | 0.018<br>$\pm 0.016$ | 0.043<br>$\pm 0.038$               | 0.172<br>$\pm 0.119$ | 0.106<br>$\pm 0.049$ | <span>0.007<br/><math>\pm</math> 0.007</span> | 0.126<br>$\pm 0.056$ | <b>0.013</b><br>$\pm$ <b>0.013</b> |                        |       |       |       |       |       |       |       |       |       |       |       |       |       |       |       |  |  |  |  |
|           | Acc.2    | 0.291<br>$\pm 0.146$ | 0.298<br>$\pm 0.161$ | 0.277<br>$\pm 0.156$ | 0.422<br>$\pm 0.206$ | 0.259<br>$\pm 0.154$ | 0.164<br>$\pm 0.075$ | 0.262<br>$\pm 0.168$ | 0.103<br>$\pm 0.054$               | 0.036<br>$\pm 0.015$ | 0.028<br>$\pm 0.012$                          | 0.034<br>$\pm 0.021$ | 0.058<br>$\pm 0.047$               | 0.248<br>$\pm 0.153$ | 0.123<br>$\pm 0.045$ | <span>0.011<br/><math>\pm</math> 0.008</span> | 0.153<br>$\pm 0.054$ | <b>0.023</b><br>$\pm$ <b>0.020</b> |                        |       |       |       |       |       |       |       |       |       |       |       |       |       |       |       |  |  |  |  |
| Subject3  | $\kappa$ | 0.130<br>$\pm 0.088$ | 0.169<br>$\pm 0.110$ | 0.099<br>$\pm 0.082$ | 0.234<br>$\pm 0.136$ | 0.139<br>$\pm 0.088$ | 0.073<br>$\pm 0.054$ | 0.111<br>$\pm 0.083$ | 0.041<br>$\pm 0.041$               | 0.014<br>$\pm 0.006$ | <b>0.008</b><br>$\pm$ <b>0.015</b>            | 0.016<br>$\pm 0.012$ | 0.014<br>$\pm 0.022$               | 0.133<br>$\pm 0.106$ | 0.063<br>$\pm 0.039$ | <span>0.003<br/><math>\pm</math> 0.006</span> | 0.073<br>$\pm 0.052$ | 0.014<br>$\pm 0.012$               |                        |       |       |       |       |       |       |       |       |       |       |       |       |       |       |       |  |  |  |  |
|           |          |                      |                      |                      |                      |                      |                      |                      |                                    |                      |                                               |                      |                                    |                      |                      |                                               |                      |                                    | Continued on next page |       |       |       |       |       |       |       |       |       |       |       |       |       |       |       |  |  |  |  |

| Subject   | Metric   | DeepConvnet     | EEGNet          | Conformer       | CTNet           | SSVEPDNN        | BIOT (f)        | BIOT (l)        | BENDR (f)                      | BENDR (l)       | CBraMod (f)                    | CBraMod (l)     | EEGPT (f)                      | EEGPT (l)       | LaBraM (f)      | LaBraM (l)                     | STEEGformer-s (f) | STEEGformer-s (l)              |
|-----------|----------|-----------------|-----------------|-----------------|-----------------|-----------------|-----------------|-----------------|--------------------------------|-----------------|--------------------------------|-----------------|--------------------------------|-----------------|-----------------|--------------------------------|-------------------|--------------------------------|
|           | AUC      | 0.131<br>±0.043 | 0.139<br>±0.048 | 0.101<br>±0.041 | 0.148<br>±0.049 | 0.163<br>±0.046 | 0.051<br>±0.024 | 0.120<br>±0.049 | 0.030<br>±0.018                | 0.080<br>±0.019 | <b>0.019</b><br>± <b>0.017</b> | 0.071<br>±0.029 | 0.016<br>± 0.013               | 0.113<br>±0.029 | 0.021<br>±0.016 | 0.028<br>±0.021                | 0.033<br>±0.022   | 0.067<br>±0.030                |
|           | BACc     | 0.127<br>±0.086 | 0.165<br>±0.107 | 0.096<br>±0.080 | 0.229<br>±0.132 | 0.136<br>±0.086 | 0.071<br>±0.053 | 0.108<br>±0.081 | 0.040<br>±0.040                | 0.013<br>±0.006 | <b>0.008</b><br>± <b>0.014</b> | 0.016<br>±0.012 | 0.014<br>±0.022                | 0.130<br>±0.103 | 0.061<br>±0.038 | 0.003<br>± 0.006               | 0.071<br>±0.051   | 0.013<br>±0.012                |
|           | Acc.1    | 0.127<br>±0.086 | 0.165<br>±0.107 | 0.096<br>±0.080 | 0.228<br>±0.132 | 0.136<br>±0.086 | 0.072<br>±0.053 | 0.108<br>±0.081 | 0.040<br>±0.040                | 0.014<br>±0.006 | <b>0.009</b><br>± <b>0.014</b> | 0.017<br>±0.012 | 0.015<br>±0.021                | 0.131<br>±0.103 | 0.062<br>±0.038 | 0.003<br>± 0.007               | 0.071<br>±0.051   | 0.014<br>±0.012                |
|           | Acc.2    | 0.180<br>±0.104 | 0.228<br>±0.129 | 0.131<br>±0.085 | 0.298<br>±0.154 | 0.191<br>±0.112 | 0.093<br>±0.058 | 0.185<br>±0.117 | 0.052<br>±0.041                | 0.027<br>±0.010 | <b>0.019</b><br>± <b>0.018</b> | 0.029<br>±0.015 | 0.022<br>±0.028                | 0.190<br>±0.126 | 0.068<br>±0.034 | 0.006<br>± 0.010               | 0.080<br>±0.052   | 0.022<br>±0.017                |
|           | $\kappa$ | 0.155<br>±0.089 | 0.177<br>±0.111 | 0.178<br>±0.123 | 0.262<br>±0.142 | 0.139<br>±0.095 | 0.102<br>±0.061 | 0.130<br>±0.091 | 0.047<br>±0.034                | 0.013<br>±0.008 | <b>0.005</b><br>± <b>0.010</b> | 0.022<br>±0.019 | 0.032<br>±0.031                | 0.169<br>±0.115 | 0.104<br>±0.059 | 0.005<br>± 0.007               | 0.115<br>±0.067   | 0.014<br>±0.013                |
|           | AUC      | 0.125<br>±0.027 | 0.130<br>±0.026 | 0.153<br>±0.036 | 0.145<br>±0.046 | 0.174<br>±0.049 | 0.059<br>±0.022 | 0.126<br>±0.051 | <b>0.030</b><br>± <b>0.019</b> | 0.074<br>±0.018 | 0.016<br>± 0.014               | 0.090<br>±0.033 | 0.036<br>±0.018                | 0.186<br>±0.061 | 0.057<br>±0.019 | 0.032<br>±0.022                | 0.055<br>±0.025   | 0.061<br>±0.027                |
|           | BACc     | 0.151<br>±0.087 | 0.173<br>±0.108 | 0.174<br>±0.120 | 0.255<br>±0.139 | 0.136<br>±0.092 | 0.099<br>±0.059 | 0.126<br>±0.089 | 0.046<br>±0.033                | 0.013<br>±0.008 | <b>0.005</b><br>± <b>0.009</b> | 0.022<br>±0.018 | 0.031<br>±0.030                | 0.165<br>±0.113 | 0.101<br>±0.058 | 0.005<br>± 0.006               | 0.112<br>±0.065   | 0.014<br>±0.012                |
|           | Acc.1    | 0.151<br>±0.087 | 0.173<br>±0.108 | 0.174<br>±0.120 | 0.255<br>±0.139 | 0.136<br>±0.092 | 0.099<br>±0.059 | 0.126<br>±0.089 | 0.045<br>±0.033                | 0.013<br>±0.008 | 0.005<br>± 0.009               | 0.024<br>±0.019 | 0.031<br>±0.030                | 0.166<br>±0.112 | 0.102<br>±0.057 | <b>0.005</b><br>± <b>0.006</b> | 0.113<br>±0.065   | 0.014<br>±0.012                |
|           | Acc.2    | 0.201<br>±0.096 | 0.232<br>±0.128 | 0.236<br>±0.138 | 0.319<br>±0.154 | 0.192<br>±0.115 | 0.134<br>±0.070 | 0.204<br>±0.127 | 0.053<br>±0.035                | 0.024<br>±0.010 | <b>0.013</b><br>± <b>0.014</b> | 0.040<br>±0.025 | 0.043<br>±0.036                | 0.238<br>±0.146 | 0.117<br>±0.054 | 0.011<br>± 0.009               | 0.131<br>±0.066   | 0.022<br>±0.016                |
|           | $\kappa$ | 0.202<br>±0.118 | 0.183<br>±0.115 | 0.170<br>±0.110 | 0.276<br>±0.153 | 0.127<br>±0.083 | 0.103<br>±0.064 | 0.142<br>±0.105 | 0.050<br>±0.036                | 0.019<br>±0.010 | 0.012<br>±0.012                | 0.017<br>±0.011 | 0.031<br>±0.033                | 0.165<br>±0.111 | 0.102<br>±0.055 | 0.009<br>± 0.006               | 0.108<br>±0.063   | <b>0.011</b><br>± <b>0.009</b> |
| Subject30 | AUC      | 0.119<br>±0.031 | 0.132<br>±0.034 | 0.163<br>±0.046 | 0.164<br>±0.046 | 0.155<br>±0.038 | 0.047<br>±0.025 | 0.119<br>±0.042 | 0.033<br>±0.015                | 0.086<br>±0.020 | 0.023<br>± 0.013               | 0.070<br>±0.026 | <b>0.026</b><br>± <b>0.016</b> | 0.159<br>±0.041 | 0.051<br>±0.016 | 0.034<br>±0.019                | 0.054<br>±0.023   | 0.049<br>±0.026                |
|           | BACc     | 0.197<br>±0.115 | 0.178<br>±0.112 | 0.165<br>±0.108 | 0.269<br>±0.149 | 0.123<br>±0.081 | 0.100<br>±0.062 | 0.138<br>±0.103 | 0.049<br>±0.035                | 0.019<br>±0.010 | 0.012<br>±0.011                | 0.016<br>±0.011 | 0.030<br>±0.032                | 0.161<br>±0.108 | 0.099<br>±0.053 | 0.009<br>± 0.006               | 0.105<br>±0.062   | <b>0.011</b><br>± <b>0.009</b> |
|           | Acc.1    | 0.197<br>±0.115 | 0.178<br>±0.112 | 0.166<br>±0.107 | 0.270<br>±0.149 | 0.123<br>±0.081 | 0.100<br>±0.062 | 0.138<br>±0.103 | 0.050<br>±0.035                | 0.019<br>±0.010 | 0.012<br>±0.011                | 0.017<br>±0.011 | 0.030<br>±0.032                | 0.161<br>±0.108 | 0.100<br>±0.054 | 0.009<br>± 0.006               | 0.105<br>±0.061   | <b>0.010</b><br>± <b>0.009</b> |
|           | Acc.2    | 0.247<br>±0.124 | 0.237<br>±0.132 | 0.224<br>±0.126 | 0.343<br>±0.167 | 0.172<br>±0.097 | 0.134<br>±0.073 | 0.219<br>±0.146 | 0.058<br>±0.037                | 0.030<br>±0.014 | 0.021<br>±0.015                | 0.029<br>±0.017 | 0.038<br>±0.032                | 0.226<br>±0.132 | 0.117<br>±0.046 | 0.015<br>± 0.009               | 0.123<br>±0.062   | <b>0.019</b><br>± <b>0.015</b> |
|           | $\kappa$ | 0.105<br>±0.057 | 0.155<br>±0.094 | 0.130<br>±0.081 | 0.264<br>±0.146 | 0.116<br>±0.073 | 0.060<br>±0.043 | 0.106<br>±0.067 | 0.019<br>±0.025                | 0.013<br>±0.007 | 0.007<br>±0.011                | 0.018<br>±0.016 | 0.002<br>± 0.014               | 0.118<br>±0.068 | 0.058<br>±0.040 | <b>0.005</b><br>± <b>0.006</b> | 0.064<br>±0.047   | 0.009<br>±0.012                |
| Subject32 | AUC      | 0.137<br>±0.041 | 0.105<br>±0.035 | 0.133<br>±0.047 | 0.153<br>±0.047 | 0.144<br>±0.048 | 0.046<br>±0.020 | 0.110<br>±0.048 | <b>0.012</b><br>± <b>0.018</b> | 0.070<br>±0.017 | 0.015<br>±0.014                | 0.076<br>±0.036 | -0.003<br>± 0.011              | 0.113<br>±0.032 | 0.023<br>±0.017 | 0.014<br>±0.013                | 0.029<br>±0.023   | 0.036<br>±0.023                |

Continued on next page

| Subject   | Metric   | DeepConvnet | EEGNet      | Conformer   | CTNet       | SSVEPDNN    | BIOT (f)    | BIOT (l)    | BENDR (f)   | BENDR (l)   | CBraMod (f)  | CBraMod (l) | EEGPT (f)    | EEGPT (l)   | LaBraM (f)  | LaBraM (l)   | STEEGformer-s (f) | STEEGformer-s (l) |
|-----------|----------|-------------|-------------|-------------|-------------|-------------|-------------|-------------|-------------|-------------|--------------|-------------|--------------|-------------|-------------|--------------|-------------------|-------------------|
| Subject33 | BAcc     | 0.102       | 0.152       | 0.127       | 0.257       | 0.113       | 0.059       | 0.103       | 0.019       | 0.013       | 0.006        | 0.018       | 0.002        | 0.115       | 0.056       | <b>0.005</b> | 0.063             | 0.009             |
|           |          | $\pm 0.056$ | $\pm 0.092$ | $\pm 0.079$ | $\pm 0.143$ | $\pm 0.072$ | $\pm 0.042$ | $\pm 0.065$ | $\pm 0.024$ | $\pm 0.007$ | $\pm 0.011$  | $\pm 0.016$ | $\pm 0.014$  | $\pm 0.066$ | $\pm 0.039$ | $\pm 0.006$  | $\pm 0.046$       | $\pm 0.012$       |
|           |          | 0.102       | 0.152       | 0.128       | 0.258       | 0.113       | 0.059       | 0.103       | 0.019       | 0.013       | 0.007        | 0.018       | 0.002        | 0.116       | 0.057       | <b>0.005</b> | 0.063             | 0.009             |
|           | Acc.1    | $\pm 0.056$ | $\pm 0.092$ | $\pm 0.080$ | $\pm 0.143$ | $\pm 0.072$ | $\pm 0.041$ | $\pm 0.065$ | $\pm 0.024$ | $\pm 0.007$ | $\pm 0.011$  | $\pm 0.016$ | $\pm 0.014$  | $\pm 0.066$ | $\pm 0.039$ | $\pm 0.006$  | $\pm 0.046$       | $\pm 0.012$       |
|           |          | 0.146       | 0.200       | 0.179       | 0.336       | 0.162       | 0.078       | 0.171       | 0.022       | 0.023       | <b>0.008</b> | 0.031       | 0.002        | 0.161       | 0.061       | 0.009        | 0.071             | 0.019             |
|           | Acc.2    | $\pm 0.074$ | $\pm 0.105$ | $\pm 0.099$ | $\pm 0.165$ | $\pm 0.093$ | $\pm 0.045$ | $\pm 0.103$ | $\pm 0.031$ | $\pm 0.010$ | $\pm 0.013$  | $\pm 0.024$ | $\pm 0.018$  | $\pm 0.075$ | $\pm 0.039$ | $\pm 0.009$  | $\pm 0.048$       | $\pm 0.016$       |
|           |          | 0.111       | 0.184       | 0.168       | 0.258       | 0.129       | 0.101       | 0.134       | 0.072       | 0.018       | 0.015        | 0.033       | 0.034        | 0.157       | 0.103       | 0.006        | 0.123             | <b>0.014</b>      |
|           | $\kappa$ | $\pm 0.061$ | $\pm 0.115$ | $\pm 0.109$ | $\pm 0.146$ | $\pm 0.085$ | $\pm 0.070$ | $\pm 0.099$ | $\pm 0.048$ | $\pm 0.011$ | $\pm 0.014$  | $\pm 0.019$ | $\pm 0.031$  | $\pm 0.094$ | $\pm 0.065$ | $\pm 0.007$  | $\pm 0.075$       | $\pm 0.011$       |
|           |          | 0.127       | 0.166       | 0.166       | 0.141       | 0.119       | 0.046       | 0.133       | 0.045       | 0.091       | 0.017        | 0.131       | 0.036        | 0.174       | 0.055       | <b>0.028</b> | 0.049             | 0.057             |
|           | AUC      | $\pm 0.028$ | $\pm 0.041$ | $\pm 0.042$ | $\pm 0.047$ | $\pm 0.042$ | $\pm 0.027$ | $\pm 0.051$ | $\pm 0.027$ | $\pm 0.024$ | $\pm 0.016$  | $\pm 0.054$ | $\pm 0.015$  | $\pm 0.036$ | $\pm 0.021$ | $\pm 0.022$  | $\pm 0.027$       | $\pm 0.023$       |
|           |          | 0.108       | 0.180       | 0.164       | 0.252       | 0.126       | 0.099       | 0.131       | 0.070       | 0.017       | 0.015        | 0.033       | 0.034        | 0.153       | 0.100       | 0.006        | 0.120             | <b>0.014</b>      |
|           | BAcc     | $\pm 0.059$ | $\pm 0.113$ | $\pm 0.106$ | $\pm 0.142$ | $\pm 0.083$ | $\pm 0.068$ | $\pm 0.097$ | $\pm 0.047$ | $\pm 0.010$ | $\pm 0.013$  | $\pm 0.019$ | $\pm 0.030$  | $\pm 0.091$ | $\pm 0.064$ | $\pm 0.006$  | $\pm 0.073$       | $\pm 0.011$       |
|           |          | 0.108       | 0.180       | 0.163       | 0.251       | 0.126       | 0.099       | 0.131       | 0.070       | 0.018       | 0.015        | 0.035       | 0.034        | 0.153       | 0.100       | 0.007        | 0.119             | <b>0.014</b>      |
|           | Acc.1    | $\pm 0.059$ | $\pm 0.113$ | $\pm 0.106$ | $\pm 0.142$ | $\pm 0.083$ | $\pm 0.069$ | $\pm 0.097$ | $\pm 0.046$ | $\pm 0.010$ | $\pm 0.013$  | $\pm 0.019$ | $\pm 0.030$  | $\pm 0.091$ | $\pm 0.063$ | $\pm 0.006$  | $\pm 0.072$       | $\pm 0.011$       |
|           |          | 0.152       | 0.239       | 0.225       | 0.323       | 0.169       | 0.130       | 0.208       | 0.086       | 0.033       | <b>0.025</b> | 0.057       | 0.043        | 0.220       | 0.113       | 0.010        | 0.134             | 0.027             |
|           | Acc.2    | $\pm 0.071$ | $\pm 0.134$ | $\pm 0.128$ | $\pm 0.162$ | $\pm 0.103$ | $\pm 0.083$ | $\pm 0.139$ | $\pm 0.057$ | $\pm 0.015$ | $\pm 0.019$  | $\pm 0.030$ | $\pm 0.035$  | $\pm 0.110$ | $\pm 0.063$ | $\pm 0.009$  | $\pm 0.072$       | $\pm 0.018$       |
| Subject34 | $\kappa$ | 0.191       | 0.174       | 0.132       | 0.251       | 0.138       | 0.096       | 0.124       | 0.071       | 0.017       | 0.015        | 0.026       | 0.023        | 0.137       | 0.104       | 0.008        | 0.095             | <b>0.015</b>      |
|           |          | $\pm 0.118$ | $\pm 0.097$ | $\pm 0.090$ | $\pm 0.137$ | $\pm 0.087$ | $\pm 0.063$ | $\pm 0.084$ | $\pm 0.056$ | $\pm 0.008$ | $\pm 0.014$  | $\pm 0.019$ | $\pm 0.030$  | $\pm 0.084$ | $\pm 0.060$ | $\pm 0.006$  | $\pm 0.051$       | $\pm 0.011$       |
|           | AUC      | 0.121       | 0.147       | 0.126       | 0.155       | 0.157       | 0.054       | 0.102       | 0.047       | 0.089       | 0.020        | 0.109       | <b>0.027</b> | 0.138       | 0.039       | 0.035        | 0.047             | 0.062             |
|           |          | $\pm 0.057$ | $\pm 0.054$ | $\pm 0.049$ | $\pm 0.062$ | $\pm 0.041$ | $\pm 0.025$ | $\pm 0.048$ | $\pm 0.037$ | $\pm 0.021$ | $\pm 0.015$  | $\pm 0.049$ | $\pm 0.015$  | $\pm 0.043$ | $\pm 0.022$ | $\pm 0.022$  | $\pm 0.018$       | $\pm 0.027$       |
|           | BAcc     | 0.187       | 0.170       | 0.129       | 0.245       | 0.134       | 0.093       | 0.120       | 0.069       | 0.016       | 0.015        | 0.026       | 0.023        | 0.133       | 0.101       | 0.008        | 0.093             | <b>0.014</b>      |
|           |          | $\pm 0.115$ | $\pm 0.094$ | $\pm 0.088$ | $\pm 0.133$ | $\pm 0.085$ | $\pm 0.061$ | $\pm 0.082$ | $\pm 0.054$ | $\pm 0.008$ | $\pm 0.014$  | $\pm 0.019$ | $\pm 0.029$  | $\pm 0.082$ | $\pm 0.059$ | $\pm 0.005$  | $\pm 0.050$       | $\pm 0.011$       |
|           | Acc.1    | 0.187       | 0.170       | 0.129       | 0.244       | 0.134       | 0.093       | 0.120       | 0.069       | 0.017       | 0.015        | 0.027       | 0.023        | 0.133       | 0.102       | 0.008        | 0.093             | <b>0.014</b>      |
|           |          | $\pm 0.115$ | $\pm 0.094$ | $\pm 0.088$ | $\pm 0.133$ | $\pm 0.085$ | $\pm 0.061$ | $\pm 0.082$ | $\pm 0.054$ | $\pm 0.008$ | $\pm 0.014$  | $\pm 0.019$ | $\pm 0.029$  | $\pm 0.082$ | $\pm 0.058$ | $\pm 0.006$  | $\pm 0.050$       | $\pm 0.011$       |
|           | Acc.2    | 0.237       | 0.231       | 0.175       | 0.311       | 0.185       | 0.127       | 0.194       | 0.083       | 0.031       | <b>0.024</b> | 0.047       | 0.031        | 0.188       | 0.112       | 0.013        | 0.112             | 0.024             |
|           |          | $\pm 0.125$ | $\pm 0.114$ | $\pm 0.101$ | $\pm 0.149$ | $\pm 0.100$ | $\pm 0.070$ | $\pm 0.122$ | $\pm 0.062$ | $\pm 0.013$ | $\pm 0.019$  | $\pm 0.032$ | $\pm 0.030$  | $\pm 0.102$ | $\pm 0.051$ | $\pm 0.011$  | $\pm 0.048$       | $\pm 0.017$       |
| Subject35 | $\kappa$ | 0.188       | 0.205       | 0.166       | 0.278       | 0.140       | 0.103       | 0.137       | 0.094       | 0.017       | 0.016        | 0.031       | 0.033        | 0.165       | 0.108       | 0.006        | 0.121             | <b>0.014</b>      |
|           |          | $\pm 0.113$ | $\pm 0.126$ | $\pm 0.107$ | $\pm 0.158$ | $\pm 0.096$ | $\pm 0.066$ | $\pm 0.093$ | $\pm 0.069$ | $\pm 0.009$ | $\pm 0.013$  | $\pm 0.018$ | $\pm 0.031$  | $\pm 0.111$ | $\pm 0.057$ | $\pm 0.008$  | $\pm 0.071$       | $\pm 0.011$       |
|           | AUC      | 0.130       | 0.145       | 0.153       | 0.155       | 0.136       | 0.041       | 0.139       | 0.057       | 0.080       | 0.015        | 0.120       | <b>0.029</b> | 0.179       | 0.032       | 0.032        | 0.052             | 0.070             |
|           |          | $\pm 0.044$ | $\pm 0.056$ | $\pm 0.050$ | $\pm 0.055$ | $\pm 0.053$ | $\pm 0.025$ | $\pm 0.059$ | $\pm 0.035$ | $\pm 0.020$ | $\pm 0.014$  | $\pm 0.042$ | $\pm 0.018$  | $\pm 0.043$ | $\pm 0.017$ | $\pm 0.021$  | $\pm 0.025$       | $\pm 0.032$       |
|           | BAcc     | 0.183       | 0.200       | 0.162       | 0.271       | 0.136       | 0.101       | 0.134       | 0.091       | 0.016       | 0.016        | 0.030       | 0.032        | 0.161       | 0.105       | 0.006        | 0.118             | <b>0.013</b>      |
|           |          | $\pm 0.110$ | $\pm 0.123$ | $\pm 0.104$ | $\pm 0.154$ | $\pm 0.094$ | $\pm 0.064$ | $\pm 0.090$ | $\pm 0.068$ | $\pm 0.009$ | $\pm 0.012$  | $\pm 0.017$ | $\pm 0.030$  | $\pm 0.108$ | $\pm 0.055$ | $\pm 0.007$  | $\pm 0.069$       | $\pm 0.010$       |

Continued on next page

| Subject  | Metric   | DeepConvnet | EEGNet      | Conformer   | CTNet       | SSVEPDNN    | BIOT <sup>(i)</sup> | BIOT <sup>(i)</sup> | BENDR <sup>(i)</sup> | BENDR <sup>(i)</sup> | CBraMod <sup>(i)</sup> | CBraMod <sup>(i)</sup> | EEGPT <sup>(i)</sup> | EEGPT <sup>(i)</sup> | LaBraM <sup>(i)</sup> | LaBraM <sup>(i)</sup> | STEEGformer-s <sup>(i)</sup> | STEEGformer-s <sup>(i)</sup> |       |
|----------|----------|-------------|-------------|-------------|-------------|-------------|---------------------|---------------------|----------------------|----------------------|------------------------|------------------------|----------------------|----------------------|-----------------------|-----------------------|------------------------------|------------------------------|-------|
|          |          |             |             |             |             |             |                     |                     |                      |                      |                        |                        |                      |                      |                       |                       |                              |                              |       |
| Subject1 | Acc.1    | 0.183       | 0.200       | 0.162       | 0.271       | 0.136       | 0.100               | 0.134               | 0.091                | 0.017                | 0.016                  | 0.032                  | 0.032                | 0.161                | 0.106                 | 0.006                 | 0.118                        | <b>0.012</b>                 | 10170 |
|          |          | $\pm 0.110$ | $\pm 0.123$ | $\pm 0.104$ | $\pm 0.153$ | $\pm 0.094$ | $\pm 0.064$         | $\pm 0.091$         | $\pm 0.068$          | $\pm 0.009$          | $\pm 0.013$            | $\pm 0.017$            | $\pm 0.030$          | $\pm 0.108$          | $\pm 0.055$           | $\pm 0.008$           | $\pm 0.069$                  | $\pm 0.010$                  | 10171 |
|          | Acc.2    | 0.241       | 0.267       | 0.215       | 0.347       | 0.186       | 0.127               | 0.217               | 0.110                | 0.028                | 0.024                  | 0.054                  | 0.042                | 0.231                | 0.115                 | 0.009                 | 0.134                        | <b>0.022</b>                 | 10172 |
|          |          | $\pm 0.130$ | $\pm 0.152$ | $\pm 0.126$ | $\pm 0.182$ | $\pm 0.117$ | $\pm 0.074$         | $\pm 0.131$         | $\pm 0.080$          | $\pm 0.016$          | $\pm 0.015$            | $\pm 0.026$            | $\pm 0.036$          | $\pm 0.134$          | $\pm 0.050$           | $\pm 0.012$           | $\pm 0.067$                  | $\pm 0.016$                  | 10173 |
|          | $\kappa$ | 0.263       | 0.184       | 0.176       | 0.287       | 0.173       | 0.086               | 0.119               | 0.068                | 0.017                | <b>0.011</b>           | 0.019                  | 0.023                | 0.150                | 0.095                 | 0.007                 | 0.094                        | 0.014                        | 10174 |
|          |          | $\pm 0.156$ | $\pm 0.107$ | $\pm 0.111$ | $\pm 0.156$ | $\pm 0.110$ | $\pm 0.054$         | $\pm 0.073$         | $\pm 0.045$          | $\pm 0.010$          | $\pm 0.013$            | $\pm 0.014$            | $\pm 0.025$          | $\pm 0.098$          | $\pm 0.058$           | $\pm 0.006$           | $\pm 0.056$                  | $\pm 0.012$                  | 10175 |
| Subject4 | AUC      | 0.184       | 0.147       | 0.168       | 0.193       | 0.215       | 0.050               | 0.117               | 0.046                | 0.090                | 0.014                  | 0.089                  | <b>0.023</b>         | 0.152                | 0.044                 | 0.030                 | 0.061                        | 0.058                        | 10176 |
|          |          | $\pm 0.060$ | $\pm 0.041$ | $\pm 0.038$ | $\pm 0.055$ | $\pm 0.054$ | $\pm 0.024$         | $\pm 0.049$         | $\pm 0.023$          | $\pm 0.023$          | $\pm 0.012$            | $\pm 0.038$            | $\pm 0.013$          | $\pm 0.036$          | $\pm 0.017$           | $\pm 0.019$           | $\pm 0.024$                  | $\pm 0.028$                  | 10177 |
|          | BAcc     | 0.257       | 0.179       | 0.172       | 0.280       | 0.169       | 0.084               | 0.116               | 0.066                | 0.016                | <b>0.011</b>           | 0.019                  | 0.022                | 0.147                | 0.092                 | 0.007                 | 0.092                        | 0.014                        | 10178 |
|          |          | $\pm 0.152$ | $\pm 0.104$ | $\pm 0.108$ | $\pm 0.152$ | $\pm 0.107$ | $\pm 0.053$         | $\pm 0.071$         | $\pm 0.044$          | $\pm 0.009$          | $\pm 0.013$            | $\pm 0.014$            | $\pm 0.024$          | $\pm 0.096$          | $\pm 0.056$           | $\pm 0.006$           | $\pm 0.055$                  | $\pm 0.012$                  | 10179 |
|          | Acc.1    | 0.257       | 0.179       | 0.173       | 0.280       | 0.169       | 0.085               | 0.116               | 0.066                | 0.016                | <b>0.011</b>           | 0.020                  | 0.023                | 0.146                | 0.094                 | 0.007                 | 0.093                        | 0.014                        | 10180 |
|          |          | $\pm 0.152$ | $\pm 0.104$ | $\pm 0.108$ | $\pm 0.151$ | $\pm 0.107$ | $\pm 0.053$         | $\pm 0.071$         | $\pm 0.044$          | $\pm 0.009$          | $\pm 0.013$            | $\pm 0.014$            | $\pm 0.024$          | $\pm 0.095$          | $\pm 0.057$           | $\pm 0.006$           | $\pm 0.055$                  | $\pm 0.012$                  | 10181 |
| Subject5 | Acc.2    | 0.329       | 0.241       | 0.238       | 0.364       | 0.237       | 0.113               | 0.185               | 0.080                | 0.031                | <b>0.018</b>           | 0.032                  | 0.031                | 0.210                | 0.106                 | 0.011                 | 0.106                        | 0.024                        | 10182 |
|          |          | $\pm 0.174$ | $\pm 0.125$ | $\pm 0.128$ | $\pm 0.175$ | $\pm 0.136$ | $\pm 0.062$         | $\pm 0.108$         | $\pm 0.050$          | $\pm 0.014$          | $\pm 0.019$            | $\pm 0.023$            | $\pm 0.027$          | $\pm 0.115$          | $\pm 0.050$           | $\pm 0.009$           | $\pm 0.050$                  | $\pm 0.018$                  | 10183 |
|          | $\kappa$ | 0.162       | 0.151       | 0.100       | 0.233       | 0.115       | 0.064               | 0.105               | 0.029                | 0.011                | <b>0.005</b>           | 0.017                  | 0.013                | 0.130                | 0.053                 | 0.003                 | 0.056                        | 0.009                        | 10184 |
|          |          | $\pm 0.118$ | $\pm 0.104$ | $\pm 0.083$ | $\pm 0.145$ | $\pm 0.078$ | $\pm 0.053$         | $\pm 0.076$         | $\pm 0.036$          | $\pm 0.007$          | $\pm 0.014$            | $\pm 0.014$            | $\pm 0.022$          | $\pm 0.103$          | $\pm 0.039$           | $\pm 0.006$           | $\pm 0.042$                  | $\pm 0.012$                  | 10185 |
|          | AUC      | 0.123       | 0.127       | 0.101       | 0.142       | 0.140       | 0.040               | 0.116               | 0.023                | 0.074                | 0.007                  | 0.071                  | <b>0.015</b>         | 0.112                | 0.018                 | 0.027                 | 0.022                        | 0.058                        | 10186 |
|          |          | $\pm 0.051$ | $\pm 0.047$ | $\pm 0.046$ | $\pm 0.054$ | $\pm 0.043$ | $\pm 0.023$         | $\pm 0.044$         | $\pm 0.020$          | $\pm 0.014$          | $\pm 0.019$            | $\pm 0.037$            | $\pm 0.013$          | $\pm 0.030$          | $\pm 0.012$           | $\pm 0.017$           | $\pm 0.020$                  | $\pm 0.028$                  | 10187 |
| Subject6 | BAcc     | 0.158       | 0.147       | 0.098       | 0.227       | 0.112       | 0.062               | 0.102               | 0.028                | 0.011                | <b>0.005</b>           | 0.016                  | 0.013                | 0.127                | 0.051                 | 0.003                 | 0.054                        | 0.008                        | 10188 |
|          |          | $\pm 0.115$ | $\pm 0.102$ | $\pm 0.081$ | $\pm 0.141$ | $\pm 0.076$ | $\pm 0.052$         | $\pm 0.074$         | $\pm 0.036$          | $\pm 0.007$          | $\pm 0.013$            | $\pm 0.013$            | $\pm 0.022$          | $\pm 0.100$          | $\pm 0.038$           | $\pm 0.006$           | $\pm 0.041$                  | $\pm 0.012$                  | 10189 |
|          | Acc.1    | 0.158       | 0.147       | 0.098       | 0.227       | 0.112       | 0.063               | 0.102               | 0.029                | 0.012                | <b>0.005</b>           | 0.018                  | 0.013                | 0.127                | 0.051                 | 0.003                 | 0.055                        | 0.009                        | 10190 |
|          |          | $\pm 0.115$ | $\pm 0.102$ | $\pm 0.081$ | $\pm 0.141$ | $\pm 0.076$ | $\pm 0.052$         | $\pm 0.073$         | $\pm 0.035$          | $\pm 0.007$          | $\pm 0.013$            | $\pm 0.013$            | $\pm 0.022$          | $\pm 0.100$          | $\pm 0.038$           | $\pm 0.006$           | $\pm 0.042$                  | $\pm 0.012$                  | 10191 |
|          | Acc.2    | 0.215       | 0.205       | 0.139       | 0.298       | 0.161       | 0.074               | 0.174               | 0.036                | 0.023                | <b>0.008</b>           | 0.031                  | 0.018                | 0.181                | 0.059                 | 0.007                 | 0.061                        | 0.017                        | 10192 |
|          |          | $\pm 0.136$ | $\pm 0.128$ | $\pm 0.093$ | $\pm 0.161$ | $\pm 0.098$ | $\pm 0.052$         | $\pm 0.108$         | $\pm 0.037$          | $\pm 0.009$          | $\pm 0.019$            | $\pm 0.022$            | $\pm 0.025$          | $\pm 0.122$          | $\pm 0.034$           | $\pm 0.010$           | $\pm 0.043$                  | $\pm 0.016$                  | 10193 |
| Subject7 | $\kappa$ | 0.182       | 0.163       | 0.133       | 0.251       | 0.103       | 0.063               | 0.112               | 0.028                | 0.011                | 0.003                  | 0.015                  | 0.010                | 0.135                | 0.070                 | <b>0.005</b>          | 0.113                        | 0.011                        | 10194 |
|          |          | $\pm 0.107$ | $\pm 0.088$ | $\pm 0.088$ | $\pm 0.137$ | $\pm 0.070$ | $\pm 0.047$         | $\pm 0.082$         | $\pm 0.026$          | $\pm 0.007$          | $\pm 0.012$            | $\pm 0.011$            | $\pm 0.012$          | $\pm 0.084$          | $\pm 0.050$           | $\pm 0.007$           | $\pm 0.072$                  | $\pm 0.010$                  | 10195 |
|          | AUC      | 0.109       | 0.122       | 0.120       | 0.139       | 0.096       | 0.030               | 0.103               | 0.019                | 0.073                | 0.007                  | 0.064                  | <b>0.008</b>         | 0.127                | 0.034                 | 0.023                 | 0.064                        | 0.035                        | 10196 |
|          |          | $\pm 0.052$ | $\pm 0.051$ | $\pm 0.048$ | $\pm 0.057$ | $\pm 0.038$ | $\pm 0.017$         | $\pm 0.044$         | $\pm 0.017$          | $\pm 0.020$          | $\pm 0.018$            | $\pm 0.028$            | $\pm 0.010$          | $\pm 0.034$          | $\pm 0.025$           | $\pm 0.018$           | $\pm 0.032$                  | $\pm 0.022$                  | 10197 |
|          | BAcc     | 0.178       | 0.159       | 0.129       | 0.245       | 0.101       | 0.061               | 0.109               | 0.027                | 0.011                | 0.003                  | 0.014                  | 0.010                | 0.131                | 0.068                 | <b>0.005</b>          | 0.110                        | 0.011                        | 10198 |
|          |          | $\pm 0.104$ | $\pm 0.086$ | $\pm 0.086$ | $\pm 0.134$ | $\pm 0.069$ | $\pm 0.046$         | $\pm 0.080$         | $\pm 0.026$          | $\pm 0.006$          | $\pm 0.012$            | $\pm 0.011$            | $\pm 0.011$          | $\pm 0.082$          | $\pm 0.049$           | $\pm 0.007$           | $\pm 0.070$                  | $\pm 0.010$                  | 10199 |
| Subject8 | Acc.1    | 0.178       | 0.159       | 0.129       | 0.245       | 0.101       | 0.061               | 0.109               | 0.027                | 0.011                | 0.003                  | 0.015                  | 0.009                | 0.131                | 0.068                 | <b>0.005</b>          | 0.110                        | 0.011                        | 10200 |
|          |          | $\pm 0.104$ | $\pm 0.086$ | $\pm 0.086$ | $\pm 0.134$ | $\pm 0.069$ | $\pm 0.046$         | $\pm 0.081$         | $\pm 0.026$          | $\pm 0.006$          | $\pm 0.012$            | $\pm 0.012$            | $\pm 0.011$          | $\pm 0.082$          | $\pm 0.050$           | $\pm 0.007$           | $\pm 0.070$                  | $\pm 0.010$                  | 10201 |

Continued on next page

| Subject  | Metric | DeepConvnet     | EEGNet          | Conformer       | CTNet           | SSVEPDNN        | BIOT <sup>(f)</sup> | BIOT <sup>(l)</sup> | BENDR <sup>(f)</sup> | BENDR <sup>(l)</sup> | CBraMod <sup>(f)</sup> | CBraMod <sup>(l)</sup> | EEGPT <sup>(f)</sup> | EEGPT <sup>(l)</sup> | LaBraM <sup>(f)</sup> | LaBraM <sup>(l)</sup> | STEEGformer-s <sup>(f)</sup> | STEEGformer-s <sup>(l)</sup> |       |
|----------|--------|-----------------|-----------------|-----------------|-----------------|-----------------|---------------------|---------------------|----------------------|----------------------|------------------------|------------------------|----------------------|----------------------|-----------------------|-----------------------|------------------------------|------------------------------|-------|
|          |        |                 |                 |                 |                 |                 |                     |                     |                      |                      |                        |                        |                      |                      |                       |                       |                              |                              |       |
| Subject7 | Acc.2  | 0.232<br>±0.122 | 0.215<br>±0.107 | 0.176<br>±0.108 | 0.313<br>±0.157 | 0.137<br>±0.086 | 0.077<br>±0.048     | 0.176<br>±0.115     | 0.033<br>±0.031      | 0.021<br>±0.011      | 0.002<br>±0.017        | 0.028<br>±0.015        | 0.008<br>±0.014      | 0.185<br>±0.100      | 0.074<br>±0.049       | 0.007<br>±0.010       | 0.128<br>±0.072              | 0.021<br>±0.015              | 10203 |
|          |        | 0.122<br>±0.064 | 0.162<br>±0.096 | 0.153<br>±0.094 | 0.251<br>±0.139 | 0.129<br>±0.085 | 0.097<br>±0.069     | 0.119<br>±0.082     | 0.046<br>±0.038      | 0.012<br>±0.009      | 0.007<br>±0.013        | 0.018<br>±0.012        | 0.018<br>±0.024      | 0.150<br>±0.099      | 0.078<br>±0.050       | 0.004<br>±0.006       | 0.107<br>±0.072              | 0.011<br>±0.014              | 10204 |
|          | AUC    | 0.143<br>±0.039 | 0.117<br>±0.029 | 0.140<br>±0.046 | 0.128<br>±0.040 | 0.128<br>±0.043 | 0.059<br>±0.026     | 0.113<br>±0.042     | 0.032<br>±0.023      | 0.068<br>±0.018      | 0.011<br>±0.018        | 0.064<br>±0.033        | -0.001<br>±0.016     | 0.129<br>±0.038      | 0.026<br>±0.019       | 0.017<br>±0.021       | 0.051<br>±0.023              | 0.039<br>±0.024              | 10205 |
|          |        | 0.119<br>±0.062 | 0.158<br>±0.094 | 0.149<br>±0.092 | 0.244<br>±0.135 | 0.125<br>±0.083 | 0.094<br>±0.067     | 0.116<br>±0.080     | 0.045<br>±0.037      | 0.011<br>±0.009      | 0.006<br>±0.013        | 0.017<br>±0.012        | 0.017<br>±0.024      | 0.146<br>±0.097      | 0.076<br>±0.048       | 0.004<br>±0.006       | 0.104<br>±0.070              | 0.010<br>±0.014              | 10206 |
|          | BAcc   | 0.119<br>±0.062 | 0.149<br>±0.093 | 0.245<br>±0.092 | 0.125<br>±0.136 | 0.096<br>±0.083 | 0.116<br>±0.068     | 0.045<br>±0.080     | 0.011<br>±0.037      | 0.011<br>±0.009      | 0.006<br>±0.013        | 0.018<br>±0.013        | 0.017<br>±0.024      | 0.147<br>±0.097      | 0.076<br>±0.049       | 0.004<br>±0.006       | 0.105<br>±0.070              | 0.011<br>±0.014              | 10207 |
|          |        | 0.170<br>±0.077 | 0.208<br>±0.111 | 0.205<br>±0.108 | 0.308<br>±0.147 | 0.173<br>±0.102 | 0.129<br>±0.079     | 0.189<br>±0.118     | 0.056<br>±0.044      | 0.022<br>±0.011      | 0.011<br>±0.016        | 0.029<br>±0.020        | 0.019<br>±0.027      | 0.206<br>±0.120      | 0.086<br>±0.043       | 0.007<br>±0.008       | 0.122<br>±0.069              | 0.021<br>±0.020              | 10208 |
|          | Acc.1  | 0.185<br>±0.115 | 0.170<br>±0.098 | 0.116<br>±0.072 | 0.253<br>±0.139 | 0.098<br>±0.062 | 0.082<br>±0.051     | 0.114<br>±0.076     | 0.047<br>±0.038      | 0.016<br>±0.007      | 0.010<br>±0.012        | 0.023<br>±0.015        | 0.020<br>±0.022      | 0.128<br>±0.072      | 0.085<br>±0.049       | 0.008<br>±0.008       | 0.091<br>±0.058              | 0.013<br>±0.012              | 10209 |
|          |        | 0.131<br>±0.061 | 0.134<br>±0.050 | 0.119<br>±0.049 | 0.157<br>±0.057 | 0.116<br>±0.032 | 0.043<br>±0.019     | 0.113<br>±0.043     | 0.036<br>±0.026      | 0.088<br>±0.021      | 0.017<br>±0.016        | 0.116<br>±0.040        | 0.025<br>±0.010      | 0.128<br>±0.032      | 0.049<br>±0.015       | 0.029<br>±0.021       | 0.044<br>±0.021              | 0.064<br>±0.032              | 10210 |
|          | BAcc   | 0.180<br>±0.112 | 0.165<br>±0.096 | 0.113<br>±0.071 | 0.247<br>±0.135 | 0.096<br>±0.061 | 0.079<br>±0.050     | 0.111<br>±0.075     | 0.046<br>±0.037      | 0.016<br>±0.007      | 0.009<br>±0.011        | 0.023<br>±0.015        | 0.019<br>±0.021      | 0.125<br>±0.071      | 0.083<br>±0.048       | 0.007<br>±0.007       | 0.089<br>±0.056              | 0.013<br>±0.012              | 10211 |
|          |        | 0.180<br>±0.112 | 0.165<br>±0.096 | 0.113<br>±0.071 | 0.248<br>±0.135 | 0.096<br>±0.061 | 0.080<br>±0.050     | 0.111<br>±0.075     | 0.046<br>±0.037      | 0.016<br>±0.007      | 0.010<br>±0.011        | 0.024<br>±0.015        | 0.020<br>±0.021      | 0.126<br>±0.071      | 0.083<br>±0.048       | 0.008<br>±0.008       | 0.089<br>±0.056              | 0.013<br>±0.012              | 10212 |
| Subject8 | Acc.2  | 0.232<br>±0.131 | 0.226<br>±0.117 | 0.156<br>±0.084 | 0.318<br>±0.154 | 0.134<br>±0.075 | 0.096<br>±0.054     | 0.181<br>±0.111     | 0.055<br>±0.045      | 0.029<br>±0.010      | 0.019<br>±0.016        | 0.041<br>±0.025        | 0.028<br>±0.021      | 0.176<br>±0.084      | 0.099<br>±0.041       | 0.012<br>±0.010       | 0.108<br>±0.055              | 0.026<br>±0.016              | 10213 |
|          |        | 0.209<br>±0.138 | 0.187<br>±0.118 | 0.137<br>±0.090 | 0.262<br>±0.151 | 0.107<br>±0.075 | 0.076<br>±0.052     | 0.122<br>±0.084     | 0.037<br>±0.034      | 0.013<br>±0.006      | 0.009<br>±0.010        | 0.024<br>±0.016        | 0.020<br>±0.023      | 0.154<br>±0.103      | 0.078<br>±0.050       | 0.008<br>±0.005       | 0.096<br>±0.069              | 0.012<br>±0.010              | 10214 |
|          | AUC    | 0.128<br>±0.043 | 0.128<br>±0.038 | 0.128<br>±0.042 | 0.138<br>±0.039 | 0.118<br>±0.036 | 0.043<br>±0.024     | 0.116<br>±0.044     | 0.025<br>±0.017      | 0.070<br>±0.014      | 0.020<br>±0.012        | 0.096<br>±0.028        | 0.013<br>±0.015      | 0.161<br>±0.037      | 0.045<br>±0.015       | 0.036<br>±0.020       | 0.042<br>±0.025              | 0.064<br>±0.020              | 10215 |
|          |        | 0.204<br>±0.135 | 0.182<br>±0.115 | 0.134<br>±0.088 | 0.255<br>±0.148 | 0.104<br>±0.074 | 0.074<br>±0.051     | 0.119<br>±0.082     | 0.036<br>±0.033      | 0.013<br>±0.006      | 0.009<br>±0.010        | 0.024<br>±0.015        | 0.019<br>±0.023      | 0.150<br>±0.100      | 0.076<br>±0.049       | 0.007<br>±0.005       | 0.093<br>±0.067              | 0.012<br>±0.009              | 10216 |
|          | BAcc   | 0.204<br>±0.135 | 0.182<br>±0.115 | 0.134<br>±0.088 | 0.256<br>±0.147 | 0.104<br>±0.074 | 0.075<br>±0.052     | 0.118<br>±0.082     | 0.037<br>±0.033      | 0.013<br>±0.006      | 0.010<br>±0.010        | 0.025<br>±0.015        | 0.020<br>±0.023      | 0.150<br>±0.100      | 0.077<br>±0.049       | 0.004<br>±0.006       | 0.093<br>±0.068              | 0.011<br>±0.010              | 10217 |
|          |        | 0.265<br>±0.154 | 0.242<br>±0.135 | 0.184<br>±0.106 | 0.329<br>±0.167 | 0.143<br>±0.091 | 0.096<br>±0.060     | 0.191<br>±0.116     | 0.041<br>±0.037      | 0.023<br>±0.008      | 0.017<br>±0.012        | 0.044<br>±0.022        | 0.026<br>±0.027      | 0.215<br>±0.124      | 0.091<br>±0.047       | 0.010<br>±0.008       | 0.108<br>±0.066              | 0.022<br>±0.014              | 10218 |
|          | Acc.1  | 0.204<br>±0.135 | 0.182<br>±0.115 | 0.134<br>±0.088 | 0.256<br>±0.147 | 0.104<br>±0.074 | 0.075<br>±0.052     | 0.118<br>±0.082     | 0.037<br>±0.033      | 0.013<br>±0.006      | 0.010<br>±0.010        | 0.025<br>±0.015        | 0.020<br>±0.023      | 0.150<br>±0.100      | 0.077<br>±0.049       | 0.004<br>±0.006       | 0.093<br>±0.068              | 0.011<br>±0.010              | 10219 |
|          |        | 0.265<br>±0.154 | 0.242<br>±0.135 | 0.184<br>±0.106 | 0.329<br>±0.167 | 0.143<br>±0.091 | 0.096<br>±0.060     | 0.191<br>±0.116     | 0.041<br>±0.037      | 0.023<br>±0.008      | 0.017<br>±0.012        | 0.044<br>±0.022        | 0.026<br>±0.027      | 0.215<br>±0.124      | 0.091<br>±0.047       | 0.010<br>±0.008       | 0.108<br>±0.066              | 0.022<br>±0.014              | 10220 |
|          | Acc.2  | 0.209<br>±0.138 | 0.187<br>±0.118 | 0.137<br>±0.090 | 0.262<br>±0.151 | 0.107<br>±0.075 | 0.076<br>±0.052     | 0.122<br>±0.084     | 0.037<br>±0.034      | 0.013<br>±0.006      | 0.009<br>±0.010        | 0.024<br>±0.016        | 0.020<br>±0.023      | 0.154<br>±0.103      | 0.078<br>±0.050       | 0.008<br>±0.005       | 0.096<br>±0.069              | 0.012<br>±0.010              | 10221 |
|          |        | 0.128<br>±0.043 | 0.128<br>±0.038 | 0.128<br>±0.042 | 0.138<br>±0.039 | 0.118<br>±0.036 | 0.043<br>±0.024     | 0.116<br>±0.044     | 0.025<br>±0.017      | 0.070<br>±0.014      | 0.020<br>±0.012        | 0.096<br>±0.028        | 0.013<br>±0.015      | 0.161<br>±0.037      | 0.045<br>±0.015       | 0.036<br>±0.020       | 0.042<br>±0.025              | 0.064<br>±0.020              | 10222 |
| Subject9 | BAcc   | 0.204<br>±0.135 | 0.182<br>±0.115 | 0.134<br>±0.088 | 0.255<br>±0.148 | 0.104<br>±0.074 | 0.074<br>±0.051     | 0.119<br>±0.082     | 0.036<br>±0.033      | 0.013<br>±0.006      | 0.009<br>±0.010        | 0.024<br>±0.015        | 0.019<br>±0.023      | 0.150<br>±0.100      | 0.076<br>±0.049       | 0.007<br>±0.005       | 0.093<br>±0.067              | 0.012<br>±0.009              | 10223 |
|          |        | 0.204<br>±0.135 | 0.182<br>±0.115 | 0.134<br>±0.088 | 0.256<br>±0.147 | 0.104<br>±0.074 | 0.075<br>±0.052     | 0.118<br>±0.082     | 0.037<br>±0.033      | 0.013<br>±0.006      | 0.010<br>±0.010        | 0.025<br>±0.015        | 0.020<br>±0.023      | 0.150<br>±0.100      | 0.077<br>±0.049       | 0.004<br>±0.006       | 0.093<br>±0.068              | 0.011<br>±0.010              | 10224 |
|          | Acc.1  | 0.265<br>±0.154 | 0.242<br>±0.135 | 0.184<br>±0.106 | 0.329<br>±0.167 | 0.143<br>±0.091 | 0.096<br>±0.060     | 0.191<br>±0.116     | 0.041<br>±0.037      | 0.023<br>±0.008      | 0.017<br>±0.012        | 0.044<br>±0.022        | 0.026<br>±0.027      | 0.215<br>±0.124      | 0.091<br>±0.047       | 0.010<br>±0.008       | 0.108<br>±0.066              | 0.022<br>±0.014              | 10225 |
|          |        | 0.209<br>±0.138 | 0.187<br>±0.118 | 0.137<br>±0.090 | 0.262<br>±0.151 | 0.107<br>±0.075 | 0.076<br>±0.052     | 0.122<br>±0.084     | 0.037<br>±0.034      | 0.013<br>±0.006      | 0.009<br>±0.010        | 0.024<br>±0.016        | 0.020<br>±0.023      | 0.154<br>±0.103      | 0.078<br>±0.050       | 0.008<br>±0.005       | 0.096<br>±0.069              | 0.012<br>±0.010              | 10226 |
|          | Acc.2  | 0.128<br>±0.043 | 0.128<br>±0.038 | 0.128<br>±0.042 | 0.138<br>±0.039 | 0.118<br>±0.036 | 0.043<br>±0.024     | 0.116<br>±0.044     | 0.025<br>±0.017      | 0.070<br>±0.014      | 0.020<br>±0.012        | 0.096<br>±0.028        | 0.013<br>±0.015      | 0.161<br>±0.037      | 0.045<br>±0.015       | 0.036<br>±0.020       | 0.042<br>±0.025              | 0.064<br>±0.020              | 10227 |
|          |        | 0.204<br>±0.135 | 0.182<br>±0.115 | 0.134<br>±0.088 | 0.255<br>±0.148 | 0.104<br>±0.074 | 0.074<br>±0.051     | 0.119<br>±0.082     | 0.036<br>±0.033      | 0.013<br>±0.006      | 0.009<br>±0.010        | 0.024<br>±0.015        | 0.019<br>±0.023      | 0.150<br>±0.100      | 0.076<br>±0.049       | 0.007<br>±0.005       | 0.093<br>±0.067              | 0.012<br>±0.009              | 10228 |
|          | BAcc   | 0.204<br>±0.135 | 0.182<br>±0.115 | 0.134<br>±0.088 | 0.256<br>±0.147 | 0.104<br>±0.074 | 0.075<br>±0.052     | 0.118<br>±0.082     | 0.037<br>±0.033      | 0.013<br>±0.006      | 0.010<br>±0.010        | 0.025<br>±0.015        | 0.020<br>±0.023      | 0.150<br>±0.100      | 0.077<br>±0.049       | 0.004<br>±0.006       | 0.093<br>±0.068              | 0.011<br>±0.010              | 10229 |
|          |        | 0.265<br>±0.154 | 0.242<br>±0.135 | 0.184<br>±0.106 | 0.329<br>±0.167 | 0.143<br>±0.091 | 0.096<br>±0.060     | 0.191<br>±0.116     | 0.041<br>±0.037      | 0.023<br>±0.008      | 0.017<br>±0.012        | 0.044<br>±0.022        | 0.026<br>±0.027      | 0.215<br>±0.124      | 0.091<br>±0.047       | 0.010<br>±0.008       | 0.108<br>±0.066              | 0.022<br>±0.014              | 10230 |
|          | Acc.1  | 0.204<br>±0.135 | 0.182<br>±0.115 | 0.134<br>±0.088 | 0.256<br>±0.147 | 0.104<br>±0.074 | 0.075<br>±0.052     | 0.118<br>±0.082     | 0.037<br>±0.033      | 0.013<br>±0.006      | 0.010<br>±0.010        | 0.025<br>±0.015        | 0.020<br>±0.023      | 0.150<br>±0.100      | 0.077<br>±0.049       | 0.004<br>±0.006       | 0.093<br>±0.068              | 0.011<br>±0.010              | 10231 |
|          |        | 0.265<br>±0.154 | 0.242<br>±0.135 | 0.184<br>±0.106 | 0.329<br>±0.167 | 0.143<br>±0.091 | 0.096<br>±0.060     | 0.191<br>±0.116     | 0.041<br>±0.037      | 0.023<br>±0.008      | 0.017<br>±0.012        | 0.044<br>±0.022        | 0.026<br>±0.027      | 0.215<br>±0.124      | 0.091<br>±0.047       | 0.010<br>±0.008       | 0.108<br>±0.066              | 0.022<br>±0.014              | 10232 |
|          | Acc.2  | 0.209<br>±0.138 | 0.187<br>±0.118 | 0.137<br>±0.090 | 0.262<br>±0.151 | 0.107<br>±0.075 | 0.076<br>±0.052     | 0.122<br>±0.084     | 0.037<br>±0.034      | 0.013<br>±0.006      | 0.009<br>±0.010        | 0.024<br>±0.016        | 0.020<br>±0.023      | 0.154<br>±0.103      | 0.078<br>±0.050       | 0.008<br>±0.005       | 0.096<br>±0.069              | 0.012<br>±0.010              | 10233 |

## G DTU AUDITORY EEG REGRESSION RESULTS

## G.1 POPULATION-LEVEL RESULTS

Table 75: Average Performance Metrics Across All Subjects of Population-Trained Models

| Model (Training strategy) | MSE                         | Pearson                     |
|---------------------------|-----------------------------|-----------------------------|
| <b>DeepConvnet</b>        | 0.994<br>$\pm 0.019$        | 0.049<br>$\pm 0.027$        |
| <b>EEGNet</b>             | 0.995<br>$\pm 0.017$        | 0.052<br>$\pm 0.031$        |
| <b>Conformer</b>          | 1.019<br>$\pm 0.019$        | 0.031<br>$\pm 0.021$        |
| <b>CTNet</b>              | 0.992<br>$\pm 0.017$        | <b>0.053</b><br>$\pm 0.034$ |
| <b>BIOT (f)</b>           | 1.292<br>$\pm 0.082$        | -0.000<br>$\pm 0.020$       |
| <b>BIOT (l)</b>           | 0.999<br>$\pm 0.018$        | 0.005<br>$\pm 0.018$        |
| <b>BENDR (f)</b>          | 1.563<br>$\pm 0.062$        | 0.003<br>$\pm 0.014$        |
| <b>BENDR (l)</b>          | 0.994<br>$\pm 0.018$        | 0.042<br>$\pm 0.023$        |
| <b>CBraMod (f)</b>        | 1.431<br>$\pm 0.032$        | 0.011<br>$\pm 0.015$        |
| <b>CBraMod (l)</b>        | 0.994<br>$\pm 0.017$        | 0.042<br>$\pm 0.027$        |
| <b>EEGPT (f)</b>          | 0.993<br>$\pm 0.017$        | 0.046<br>$\pm 0.034$        |
| <b>EEGPT (l)</b>          | <b>0.992</b><br>$\pm 0.017$ | <b>0.058</b><br>$\pm 0.032$ |
| <b>LaBraM (f)</b>         | 1.611<br>$\pm 0.030$        | 0.017<br>$\pm 0.011$        |
| <b>LaBraM (l)</b>         | 0.993<br>$\pm 0.018$        | 0.024<br>$\pm 0.020$        |
| <b>STEEGformer-s (f)</b>  | 1.233<br>$\pm 0.026$        | 0.018<br>$\pm 0.018$        |
| <b>STEEGformer-s (l)</b>  | <b>0.992</b><br>$\pm 0.019$ | 0.020<br>$\pm 0.031$        |

10290  
10291  
10292  
10293  
10294  
10295  
10296  
10297  
10298  
10299  
10300  
10301  
10302  
10303  
10304  
10305  
10306  
10307  
10308  
10309  
10310  
10311  
10312  
10313  
10314  
10315  
10316  
10317  
10318  
10319  
10320  
10321  
10322

Table 76: Per-Subject Performance Metrics of Population-Trained Models

| SubjectMetric          |         | DeepConvnet  | EEGNet       | Conformer | CTNet        | BIOT (f)     | BIOT (l) | BENDR (f) | BENDR (l) | CBraMod (f) | CBraMod (l)  | EEGPT (f)    | EEGPT (l)                       | LaBraM (f) | LaBraM (l)   | STEEGformers (f) | STEEGformers (l) |
|------------------------|---------|--------------|--------------|-----------|--------------|--------------|----------|-----------|-----------|-------------|--------------|--------------|---------------------------------|------------|--------------|------------------|------------------|
| S1                     | MSE     | <b>1.003</b> | 1.006        | 1.033     | 1.003        | 1.342        | 1.018    | 1.624     | 1.011     | 1.401       | 1.003        | 1.009        | 1.005<br>±0.001<br>0.085        | 1.621      | 1.008        | 1.240            | 1.009            |
|                        | Pearson | 0.088        | <b>0.088</b> | 0.052     | 0.091        | -0.022       | -0.018   | 0.004     | 0.046     | 0.051       | 0.084        | 0.053        | ±0.006                          | 0.021      | 0.062        | 0.024            | 0.007            |
| S10                    | MSE     | 0.985        | 0.990        | 0.996     | 0.986        | 1.236        | 0.991    | 1.583     | 0.983     | 1.435       | 0.987        | 0.979        | 0.984<br>±0.001<br>0.023        | 1.597      | <b>0.982</b> | 1.232            | 0.982            |
|                        | Pearson | 0.012        | 0.020        | 0.052     | 0.015        | 0.008        | -0.017   | 0.007     | 0.028     | 0.010       | -0.008       | <b>0.032</b> | ±0.008                          | 0.012      | 0.005        | 0.014            | -0.037           |
| S11                    | MSE     | 0.983        | 0.990        | 0.994     | 0.983        | 1.050        | 0.993    | 1.361     | 0.989     | 1.347       | 0.982        | 0.984        | 0.984<br>±0.003<br>0.016        | 1.515      | <b>0.980</b> | 1.231            | 0.976            |
|                        | Pearson | 0.001        | -0.002       | 0.022     | -0.015       | <b>0.028</b> | 0.002    | 0.001     | -0.021    | 0.005       | -0.006       | 0.012        | ±0.019                          | 0.021      | 0.012        | 0.006            | 0.052            |
| S12                    | MSE     | 0.961        | 0.967        | 1.001     | 0.965        | 1.209        | 0.972    | 1.545     | 0.968     | 1.368       | 0.965        | 0.967        | 0.965<br>±0.001<br>0.055        | 1.589      | 0.967        | 1.191            | <b>0.962</b>     |
|                        | Pearson | <b>0.060</b> | 0.059        | 0.010     | 0.047        | 0.039        | 0.000    | 0.006     | 0.028     | 0.032       | 0.052        | 0.040        | ±0.005                          | 0.016      | 0.017        | 0.019            | 0.076            |
| S13                    | MSE     | 0.976        | 0.981        | 1.005     | 0.981        | 1.248        | 0.988    | 1.516     | 0.983     | 1.444       | 0.984        | 0.979        | <b>0.976</b><br>±0.000          | 1.574      | 0.983        | 1.217            | 0.981            |
|                        | Pearson | <b>0.086</b> | 0.079        | 0.046     | 0.065        | 0.002        | 0.008    | 0.030     | 0.053     | -0.004      | 0.040        | 0.077        | 0.096<br>±0.002                 | 0.029      | 0.026        | 0.019            | 0.033            |
| S14                    | MSE     | 1.022        | 1.013        | 1.036     | 1.010        | 1.349        | 1.015    | 1.617     | 1.012     | 1.473       | <b>1.011</b> | 1.012        | 1.014<br>±0.000<br>0.053        | 1.619      | 1.014        | 1.283            | 1.013            |
|                        | Pearson | 0.034        | <b>0.062</b> | 0.034     | 0.069        | -0.016       | 0.014    | 0.013     | 0.059     | 0.010       | 0.057        | 0.059        | ±0.001                          | 0.016      | 0.011        | -0.023           | -0.006           |
| S15                    | MSE     | 1.008        | 1.010        | 1.035     | 1.006        | 1.309        | 1.015    | 1.635     | 1.009     | 1.453       | 1.003        | 1.006        | <b>1.005</b><br>±0.001<br>0.085 | 1.595      | 1.007        | 1.217            | 1.007            |
|                        | Pearson | 0.067        | 0.061        | 0.034     | 0.075        | 0.035        | 0.001    | -0.027    | 0.058     | 0.010       | 0.086        | 0.075        | ±0.008                          | 0.039      | 0.066        | 0.049            | 0.070            |
| S16                    | MSE     | 0.963        | 0.967        | 0.984     | <b>0.963</b> | 1.240        | 0.975    | 1.490     | 0.968     | 1.422       | 0.971        | 0.969        | 0.966<br>±0.001                 | 1.601      | 0.971        | 1.229            | 0.969            |
| Continued on next page |         |              |              |           |              |              |          |           |           |             |              |              |                                 |            |              |                  |                  |

|                        |         |              |              |        |              |        |        |        |              |        |              |       |                                                |        |              |        |              |       |
|------------------------|---------|--------------|--------------|--------|--------------|--------|--------|--------|--------------|--------|--------------|-------|------------------------------------------------|--------|--------------|--------|--------------|-------|
|                        |         |              |              |        |              |        |        |        |              |        |              |       |                                                |        |              |        |              | 10323 |
|                        |         |              |              |        |              |        |        |        |              |        |              |       |                                                |        |              |        |              | 10324 |
|                        |         |              |              |        |              |        |        |        |              |        |              |       |                                                |        |              |        |              | 10325 |
|                        |         |              |              |        |              |        |        |        |              |        |              |       |                                                |        |              |        |              | 10326 |
|                        |         |              |              |        |              |        |        |        |              |        |              |       |                                                |        |              |        |              | 10327 |
|                        |         |              |              |        |              |        |        |        |              |        |              |       |                                                |        |              |        |              | 10328 |
|                        |         |              |              |        |              |        |        |        |              |        |              |       |                                                |        |              |        |              | 10329 |
|                        |         |              |              |        |              |        |        |        |              |        |              |       |                                                |        |              |        |              | 10330 |
|                        |         |              |              |        |              |        |        |        |              |        |              |       |                                                |        |              |        |              | 10331 |
|                        |         |              |              |        |              |        |        |        |              |        |              |       |                                                |        |              |        |              | 10332 |
|                        |         |              |              |        |              |        |        |        |              |        |              |       |                                                |        |              |        |              | 10333 |
|                        |         |              |              |        |              |        |        |        |              |        |              |       |                                                |        |              |        |              | 10334 |
|                        |         |              |              |        |              |        |        |        |              |        |              |       |                                                |        |              |        |              | 10335 |
|                        |         |              |              |        |              |        |        |        |              |        |              |       |                                                |        |              |        |              | 10336 |
|                        |         |              |              |        |              |        |        |        |              |        |              |       |                                                |        |              |        |              | 10337 |
|                        |         |              |              |        |              |        |        |        |              |        |              |       |                                                |        |              |        |              | 10338 |
|                        |         |              |              |        |              |        |        |        |              |        |              |       |                                                |        |              |        |              | 10339 |
|                        |         |              |              |        |              |        |        |        |              |        |              |       |                                                |        |              |        |              | 10340 |
|                        |         |              |              |        |              |        |        |        |              |        |              |       |                                                |        |              |        |              | 10341 |
|                        |         |              |              |        |              |        |        |        |              |        |              |       |                                                |        |              |        |              | 10342 |
|                        |         |              |              |        |              |        |        |        |              |        |              |       |                                                |        |              |        |              | 10343 |
|                        |         |              |              |        |              |        |        |        |              |        |              |       |                                                |        |              |        |              | 10344 |
|                        |         |              |              |        |              |        |        |        |              |        |              |       |                                                |        |              |        |              | 10345 |
|                        |         |              |              |        |              |        |        |        |              |        |              |       |                                                |        |              |        |              | 10346 |
|                        |         |              |              |        |              |        |        |        |              |        |              |       |                                                |        |              |        |              | 10347 |
|                        |         |              |              |        |              |        |        |        |              |        |              |       |                                                |        |              |        |              | 10348 |
|                        |         |              |              |        |              |        |        |        |              |        |              |       |                                                |        |              |        |              | 10349 |
|                        |         |              |              |        |              |        |        |        |              |        |              |       |                                                |        |              |        |              | 10350 |
|                        |         |              |              |        |              |        |        |        |              |        |              |       |                                                |        |              |        |              | 10351 |
|                        |         |              |              |        |              |        |        |        |              |        |              |       |                                                |        |              |        |              | 10352 |
|                        |         |              |              |        |              |        |        |        |              |        |              |       |                                                |        |              |        |              | 10353 |
|                        |         |              |              |        |              |        |        |        |              |        |              |       |                                                |        |              |        |              | 10354 |
|                        |         |              |              |        |              |        |        |        |              |        |              |       |                                                |        |              |        |              | 10355 |
| S17                    | Pearson | 0.067        | <b>0.077</b> | 0.065  | 0.081        | 0.008  | 0.009  | 0.004  | 0.048        | 0.004  | 0.034        | 0.032 | 0.065<br>±0.004                                | 0.011  | 0.005        | -0.002 | 0.009        |       |
|                        | MSE     | 1.006        | 1.007        | 1.035  | 1.004        | 1.373  | 1.009  | 1.553  | 1.005        | 1.418  | 1.006        | 1.005 | 1.002<br>± 0.000                               | 1.626  | 1.005        | 1.247  | <b>1.003</b> |       |
|                        | Pearson | 0.046        | 0.045        | 0.017  | 0.047        | -0.017 | 0.029  | -0.028 | <b>0.048</b> | 0.011  | 0.037        | 0.039 | 0.061<br>± 0.001                               | 0.025  | 0.022        | 0.027  | 0.038        |       |
| S18                    | MSE     | 0.976        | 0.974        | 1.017  | 0.973        | 1.210  | 0.971  | 1.605  | <b>0.969</b> | 1.449  | 0.975        | 0.971 | 0.973<br>±0.000<br>0.014                       | 1.626  | 0.970        | 1.185  | 0.967        |       |
|                        | Pearson | 0.014        | 0.016        | -0.016 | 0.008        | -0.014 | 0.003  | -0.001 | <b>0.045</b> | -0.005 | -0.002       | 0.012 | ±0.004                                         | 0.005  | 0.003        | 0.035  | 0.047        |       |
| S2                     | MSE     | 1.020        | <b>1.015</b> | 1.044  | 1.015        | 1.273  | 1.023  | 1.644  | 1.019        | 1.444  | 1.017        | 1.017 | 1.017<br>±0.000<br>0.063                       | 1.638  | 1.017        | 1.255  | 1.019        |       |
|                        | Pearson | 0.055        | 0.081        | 0.023  | <b>0.080</b> | -0.001 | 0.002  | -0.010 | 0.052        | 0.013  | 0.054        | 0.067 | ±0.003                                         | 0.017  | 0.052        | 0.013  | -0.004       |       |
| S3                     | MSE     | 1.013        | 1.009        | 1.029  | 1.007        | 1.398  | 1.007  | 1.561  | 1.006        | 1.425  | 1.010        | 1.006 | <b>1.005</b><br>± <b>0.001</b><br><b>0.061</b> | 1.628  | 1.007        | 1.248  | 1.004        |       |
|                        | Pearson | 0.055        | 0.049        | 0.045  | 0.050        | -0.019 | 0.041  | 0.008  | 0.055        | 0.025  | 0.035        | 0.056 | ± <b>0.008</b>                                 | 0.016  | 0.009        | 0.001  | 0.063        |       |
| S4                     | MSE     | 1.005        | 1.003        | 1.019  | <b>1.001</b> | 1.299  | 1.015  | 1.590  | 1.009        | 1.439  | 1.005        | 1.002 | 0.999<br>± 0.001                               | 1.639  | 1.005        | 1.231  | 1.003        |       |
|                        | Pearson | 0.056        | <b>0.073</b> | 0.063  | 0.071        | -0.010 | -0.032 | 0.003  | 0.022        | 0.016  | 0.051        | 0.063 | 0.082<br>± 0.005                               | 0.006  | 0.038        | 0.019  | 0.032        |       |
| S5                     | MSE     | 0.979        | 0.978        | 0.995  | 0.978        | 1.271  | 0.980  | 1.564  | 0.981        | 1.462  | 0.978        | 0.979 | 0.978<br>±0.000<br>0.034                       | 1.642  | <b>0.977</b> | 1.204  | 0.975        |       |
|                        | Pearson | <b>0.041</b> | 0.050        | 0.039  | 0.038        | 0.004  | 0.009  | 0.006  | 0.026        | -0.024 | 0.033        | 0.017 | ±0.002                                         | -0.012 | 0.005        | 0.023  | 0.002        |       |
| S6                     | MSE     | 1.019        | 1.016        | 1.039  | 1.015        | 1.323  | 1.012  | 1.581  | 1.013        | 1.447  | 1.012        | 1.012 | 1.013<br>±0.000<br>0.020                       | 1.642  | 1.006        | 1.266  | <b>1.008</b> |       |
|                        | Pearson | 0.007        | 0.005        | 0.013  | 0.001        | 0.004  | -0.014 | 0.023  | 0.013        | 0.018  | <b>0.025</b> | 0.004 | ±0.001                                         | 0.007  | 0.043        | -0.002 | -0.017       |       |
| S7                     | MSE     | 1.013        | 1.017        | 1.055  | <b>1.010</b> | 1.335  | 1.030  | 1.589  | 1.018        | 1.481  | 1.017        | 1.013 | 1.008<br>± 0.000                               | 1.635  | 1.024        | 1.266  | 1.023        |       |
| Continued on next page |         |              |              |        |              |        |        |        |              |        |              |       |                                                |        |              |        |              |       |



|               |         |             |        |           |       |          |          |           |           |             |             |                  |                           |                  |            |                   |                   |       |
|---------------|---------|-------------|--------|-----------|-------|----------|----------|-----------|-----------|-------------|-------------|------------------|---------------------------|------------------|------------|-------------------|-------------------|-------|
|               |         |             |        |           |       |          |          |           |           |             |             |                  |                           |                  |            |                   |                   | 10356 |
|               |         |             |        |           |       |          |          |           |           |             |             |                  |                           |                  |            |                   |                   | 10357 |
|               |         |             |        |           |       |          |          |           |           |             |             |                  |                           |                  |            |                   |                   | 10358 |
|               |         |             |        |           |       |          |          |           |           |             |             |                  |                           |                  |            |                   |                   | 10359 |
|               |         |             |        |           |       |          |          |           |           |             |             |                  |                           |                  |            |                   |                   | 10360 |
|               |         |             |        |           |       |          |          |           |           |             |             |                  |                           |                  |            |                   |                   | 10361 |
|               |         |             |        |           |       |          |          |           |           |             |             |                  |                           |                  |            |                   |                   | 10362 |
|               |         |             |        |           |       |          |          |           |           |             |             |                  |                           |                  |            |                   |                   | 10363 |
|               |         |             |        |           |       |          |          |           |           |             |             |                  |                           |                  |            |                   |                   | 10364 |
|               |         |             |        |           |       |          |          |           |           |             |             |                  |                           |                  |            |                   |                   | 10365 |
|               |         |             |        |           |       |          |          |           |           |             |             |                  |                           |                  |            |                   |                   | 10366 |
|               |         |             |        |           |       |          |          |           |           |             |             |                  |                           |                  |            |                   |                   | 10367 |
|               |         |             |        |           |       |          |          |           |           |             |             |                  |                           |                  |            |                   |                   | 10368 |
|               |         |             |        |           |       |          |          |           |           |             |             |                  |                           |                  |            |                   |                   | 10369 |
|               |         |             |        |           |       |          |          |           |           |             |             |                  |                           |                  |            |                   |                   | 10370 |
|               |         |             |        |           |       |          |          |           |           |             |             |                  |                           |                  |            |                   |                   | 10371 |
|               |         |             |        |           |       |          |          |           |           |             |             |                  |                           |                  |            |                   |                   | 10372 |
|               |         |             |        |           |       |          |          |           |           |             |             |                  |                           |                  |            |                   |                   | 10373 |
|               |         |             |        |           |       |          |          |           |           |             |             |                  |                           |                  |            |                   |                   | 10374 |
|               |         |             |        |           |       |          |          |           |           |             |             |                  |                           |                  |            |                   |                   | 10375 |
|               |         |             |        |           |       |          |          |           |           |             |             |                  |                           |                  |            |                   |                   | 10376 |
|               |         |             |        |           |       |          |          |           |           |             |             |                  |                           |                  |            |                   |                   | 10377 |
|               |         |             |        |           |       |          |          |           |           |             |             |                  |                           |                  |            |                   |                   | 10378 |
|               |         |             |        |           |       |          |          |           |           |             |             |                  |                           |                  |            |                   |                   | 10379 |
|               |         |             |        |           |       |          |          |           |           |             |             |                  |                           |                  |            |                   |                   | 10380 |
|               |         |             |        |           |       |          |          |           |           |             |             |                  |                           |                  |            |                   |                   | 10381 |
|               |         |             |        |           |       |          |          |           |           |             |             |                  |                           |                  |            |                   |                   | 10382 |
|               |         |             |        |           |       |          |          |           |           |             |             |                  |                           |                  |            |                   |                   | 10383 |
|               |         |             |        |           |       |          |          |           |           |             |             |                  |                           |                  |            |                   |                   | 10384 |
|               |         |             |        |           |       |          |          |           |           |             |             |                  |                           |                  |            |                   |                   | 10385 |
|               |         |             |        |           |       |          |          |           |           |             |             |                  |                           |                  |            |                   |                   | 10386 |
|               |         |             |        |           |       |          |          |           |           |             |             |                  |                           |                  |            |                   |                   | 10387 |
|               |         |             |        |           |       |          |          |           |           |             |             |                  |                           |                  |            |                   |                   | 10388 |
|               |         |             |        |           |       |          |          |           |           |             |             |                  |                           |                  |            |                   |                   |       |
| SubjectMetric |         | DeepConvnet | EEGNet | Conformer | CTNet | BIOT (f) | BIOT (l) | BENDR (f) | BENDR (l) | CBraMod (f) | CBraMod (l) | EEGPT (f)        | EEGPT (l)                 | LaBraM (f)       | LaBraM (l) | STEEGformer-s (f) | STEEGformer-s (l) |       |
|               |         | Pearson     | 0.103  | 0.119     | 0.024 | 0.136    | -0.026   | 0.006     | -0.004    | 0.091       | 0.006       | 0.093            | 0.147                     | 0.144<br>± 0.000 | 0.030      | 0.045             | 0.028             | 0.001 |
| S8            | MSE     | 0.974       | 0.977  | 1.015     | 0.973 | 1.409    | 0.979    | 1.520     | 0.974     | 1.415       | 0.974       | 0.972<br>± 0.000 | 0.972<br>± 0.000          | 1.607            | 0.975      | 1.196             | 0.974             |       |
|               | Pearson | 0.058       | 0.032  | -0.009    | 0.047 | -0.032   | 0.007    | 0.016     | 0.049     | -0.005      | 0.044       | 0.050            | 0.062<br>± 0.002          | 0.023            | -0.004     | 0.055             | -0.021            |       |
| S9            | MSE     | 0.987       | 0.992  | 1.012     | 0.984 | 1.373    | 0.988    | 1.549     | 0.981     | 1.433       | 0.983       | 0.989            | 0.986<br>± 0.000<br>0.026 | 1.608            | 0.982      | 1.247             | 0.981             |       |
|               | Pearson | 0.036       | 0.017  | 0.036     | 0.040 | 0.025    | 0.038    | 0.001     | 0.059     | 0.019       | 0.044       | -0.011           | ± 0.002                   | 0.024            | 0.025      | 0.017             | 0.021             |       |

## G.2 PER-SUBJECT RESULTS

## G.2.1 WITHIN-SUBJECT EVALUATION

Table 77: Average "Self" Performance Across All Subjects

| Model (Training strategy) | MSE                         | Pearson                     |
|---------------------------|-----------------------------|-----------------------------|
| <b>DeepConvnet</b>        | 2.687<br>$\pm 1.220$        | 0.041<br>$\pm 0.033$        |
| <b>EEGNet</b>             | 1.002<br>$\pm 0.021$        | <b>0.062</b><br>$\pm 0.039$ |
| <b>Conformer</b>          | 1.663<br>$\pm 0.210$        | 0.014<br>$\pm 0.029$        |
| <b>CTNet</b>              | 0.996<br>$\pm 0.020$        | <b>0.059</b><br>$\pm 0.038$ |
| <b>BIOT (f)</b>           | 1.406<br>$\pm 0.050$        | -0.006<br>$\pm 0.014$       |
| <b>BIOT (l)</b>           | 1.029<br>$\pm 0.029$        | -0.003<br>$\pm 0.027$       |
| <b>BENDR (f)</b>          | 1.600<br>$\pm 0.129$        | 0.003<br>$\pm 0.022$        |
| <b>BENDR (l)</b>          | 1.025<br>$\pm 0.018$        | 0.025<br>$\pm 0.018$        |
| <b>CBraMod (f)</b>        | 1.280<br>$\pm 0.027$        | 0.020<br>$\pm 0.029$        |
| <b>CBraMod (l)</b>        | 1.023<br>$\pm 0.022$        | 0.041<br>$\pm 0.023$        |
| <b>EEGPT (f)</b>          | 1.251<br>$\pm 0.028$        | 0.015<br>$\pm 0.013$        |
| <b>EEGPT (l)</b>          | 1.013<br>$\pm 0.021$        | 0.050<br>$\pm 0.032$        |
| <b>LaBraM (f)</b>         | 1.472<br>$\pm 0.059$        | 0.019<br>$\pm 0.019$        |
| <b>LaBraM (l)</b>         | <b>0.994</b><br>$\pm 0.018$ | 0.017<br>$\pm 0.022$        |
| <b>STEEGformer-s (f)</b>  | 1.320<br>$\pm 0.131$        | 0.027<br>$\pm 0.023$        |
| <b>STEEGformer-s (l)</b>  | <b>0.995</b><br>$\pm 0.019$ | 0.007<br>$\pm 0.033$        |

10443  
10444  
10445  
10446  
10447  
10448  
10449  
10450  
10451  
10452  
10453  
10454  
10455  
10456  
10457  
10458  
10459  
10460  
10461  
10462  
10463  
10464  
10465  
10466  
10467  
10468  
10469  
10470  
10471  
10472  
10473  
10474  
10475

Table 78: Per-Subject "Self" Performance (trained+tested on same subject)

| SubjectMetric          |         | DeepConvnet | EEGNet       | Conformer    | CTNet        | BIOT (f) | BIOT (l) | BENDR (f) | BENDR (l)    | CBraMod (f) | CBraMod (l)  | EEGPT (f) | EEGPT (l)    | LaBraM (f) | LaBraM (l)   | STEEGformers-s (f) | STEEGformers-s (l) |
|------------------------|---------|-------------|--------------|--------------|--------------|----------|----------|-----------|--------------|-------------|--------------|-----------|--------------|------------|--------------|--------------------|--------------------|
| S1                     | MSE     | 1.698       | 1.023        | 1.585        | 1.009        | 1.419    | 1.052    | 1.709     | 1.050        | 1.272       | 1.055        | 1.282     | 1.044        | 1.502      | <b>1.014</b> | 1.231              | 1.017              |
|                        | Pearson | 0.079       | 0.070        | 0.021        | <b>0.077</b> | -0.011   | -0.010   | 0.014     | 0.024        | 0.050       | 0.071        | 0.002     | 0.034        | 0.009      | -0.017       | 0.051              | -0.074             |
| S10                    | MSE     | 3.973       | 1.003        | 1.775        | 0.988        | 1.441    | 1.014    | 1.603     | 1.015        | 1.313       | 0.995        | 1.283     | 1.011        | 1.593      | <b>0.983</b> | 1.425              | 0.982              |
|                        | Pearson | -0.029      | -0.005       | -0.022       | 0.009        | -0.021   | 0.003    | 0.003     | 0.017        | -0.049      | <b>0.019</b> | 0.006     | 0.018        | -0.021     | 0.013        | -0.016             | 0.024              |
| S11                    | MSE     | 1.017       | 0.993        | 1.094        | 0.981        | 1.230    | 0.994    | 1.171     | 1.010        | 1.322       | <b>0.978</b> | 1.238     | 0.997        | 1.534      | 0.981        | 1.406              | 0.975              |
|                        | Pearson | 0.018       | 0.012        | <b>0.046</b> | 0.020        | -0.009   | 0.010    | -0.019    | -0.004       | -0.013      | 0.029        | 0.009     | 0.023        | 0.008      | 0.019        | 0.022              | 0.052              |
| S12                    | MSE     | 2.905       | 0.968        | 1.626        | 0.969        | 1.382    | 0.992    | 1.482     | 1.000        | 1.287       | 1.016        | 1.219     | 0.991        | 1.385      | <b>0.967</b> | 1.389              | 0.964              |
|                        | Pearson | 0.017       | 0.057        | 0.012        | 0.029        | 0.014    | 0.002    | 0.017     | 0.015        | 0.022       | 0.030        | -0.001    | 0.025        | 0.020      | 0.015        | 0.020              | <b>0.034</b>       |
| S13                    | MSE     | 2.210       | 0.985        | 1.734        | 0.976        | 1.428    | 1.009    | 1.508     | 1.012        | 1.272       | 1.018        | 1.240     | 0.992        | 1.434      | <b>0.983</b> | 1.359              | 0.986              |
|                        | Pearson | 0.074       | 0.079        | 0.025        | 0.094        | -0.025   | 0.025    | 0.054     | 0.028        | 0.016       | 0.024        | 0.026     | <b>0.081</b> | 0.034      | 0.029        | 0.044              | 0.013              |
| S14                    | MSE     | 4.320       | 1.045        | 1.911        | 1.031        | 1.435    | 1.082    | 1.707     | 1.041        | 1.281       | 1.051        | 1.284     | 1.062        | 1.498      | 1.016        | 1.447              | <b>1.017</b>       |
|                        | Pearson | 0.024       | 0.028        | 0.016        | 0.035        | -0.006   | 0.008    | -0.006    | <b>0.041</b> | 0.019       | 0.051        | -0.003    | -0.001       | -0.010     | -0.006       | 0.010              | -0.037             |
| S15                    | MSE     | 2.479       | 1.026        | 1.636        | <b>1.009</b> | 1.457    | 1.058    | 1.694     | 1.042        | 1.270       | 1.060        | 1.252     | 1.025        | 1.465      | 1.008        | 1.345              | 1.010              |
|                        | Pearson | 0.061       | 0.082        | 0.054        | 0.092        | -0.038   | 0.040    | 0.008     | 0.045        | 0.046       | 0.066        | 0.032     | <b>0.082</b> | 0.044      | 0.047        | 0.034              | 0.029              |
| S16                    | MSE     | 4.320       | 0.974        | 1.562        | <b>0.970</b> | 1.400    | 0.994    | 1.641     | 1.000        | 1.204       | 0.992        | 1.229     | 0.982        | 1.391      | 0.969        | 1.392              | 0.971              |
|                        | Pearson | 0.073       | <b>0.074</b> | 0.027        | 0.067        | 0.009    | -0.012   | -0.016    | 0.024        | 0.056       | 0.057        | 0.008     | 0.076        | 0.031      | 0.018        | 0.030              | -0.006             |
| S17                    | MSE     | 1.060       | 1.000        | 1.422        | <b>1.003</b> | 1.414    | 1.035    | 1.500     | 1.030        | 1.243       | 1.020        | 1.282     | 1.014        | 1.387      | 1.004        | 1.295              | 1.007              |
|                        | Pearson | 0.060       | 0.103        | 0.003        | <b>0.091</b> | -0.003   | 0.013    | 0.015     | 0.027        | 0.068       | 0.034        | 0.014     | 0.069        | 0.061      | 0.048        | 0.058              | 0.015              |
| S18                    | MSE     | 4.464       | 0.994        | 1.852        | 0.982        | 1.379    | 1.007    | 1.573     | 0.998        | 1.304       | 1.022        | 1.232     | 0.998        | 1.443      | <b>0.973</b> | 1.284              | 0.972              |
|                        | Pearson | 0.004       | 0.022        | -0.046       | 0.016        | 0.004    | -0.057   | 0.039     | <b>0.030</b> | -0.020      | -0.020       | 0.017     | 0.025        | 0.006      | -0.009       | 0.018              | -0.023             |
| S2                     | MSE     | 2.696       | 1.013        | 1.721        | 1.026        | 1.467    | 1.077    | 1.622     | 1.050        | 1.266       | 1.029        | 1.295     | 1.032        | 1.463      | <b>1.019</b> | 1.399              | 1.021              |
| Continued on next page |         |             |              |              |              |          |          |           |              |             |              |           |              |            |              |                    |                    |

|               |         |              |              |           |              |          |                          |              |           |             |             |                          |              |            |              |                   | 10476             |
|---------------|---------|--------------|--------------|-----------|--------------|----------|--------------------------|--------------|-----------|-------------|-------------|--------------------------|--------------|------------|--------------|-------------------|-------------------|
|               |         |              |              |           |              |          |                          |              |           |             |             |                          |              |            |              |                   | 10477             |
|               |         |              |              |           |              |          |                          |              |           |             |             |                          |              |            |              |                   | 10478             |
|               |         |              |              |           |              |          |                          |              |           |             |             |                          |              |            |              |                   | 10479             |
|               |         |              |              |           |              |          |                          |              |           |             |             |                          |              |            |              |                   | 10480             |
|               |         |              |              |           |              |          |                          |              |           |             |             |                          |              |            |              |                   | 10481             |
|               |         |              |              |           |              |          |                          |              |           |             |             |                          |              |            |              |                   | 10482             |
|               |         |              |              |           |              |          |                          |              |           |             |             |                          |              |            |              |                   | 10483             |
|               |         |              |              |           |              |          |                          |              |           |             |             |                          |              |            |              |                   | 10484             |
|               |         |              |              |           |              |          |                          |              |           |             |             |                          |              |            |              |                   | 10485             |
|               |         |              |              |           |              |          |                          |              |           |             |             |                          |              |            |              |                   | 10486             |
|               |         |              |              |           |              |          |                          |              |           |             |             |                          |              |            |              |                   | 10487             |
|               |         |              |              |           |              |          |                          |              |           |             |             |                          |              |            |              |                   | 10488             |
|               |         |              |              |           |              |          |                          |              |           |             |             |                          |              |            |              |                   | 10489             |
|               |         |              |              |           |              |          |                          |              |           |             |             |                          |              |            |              |                   | 10490             |
|               |         |              |              |           |              |          |                          |              |           |             |             |                          |              |            |              |                   | 10491             |
|               |         |              |              |           |              |          |                          |              |           |             |             |                          |              |            |              |                   | 10492             |
|               |         |              |              |           |              |          |                          |              |           |             |             |                          |              |            |              |                   | 10493             |
|               |         |              |              |           |              |          |                          |              |           |             |             |                          |              |            |              |                   | 10494             |
|               |         |              |              |           |              |          |                          |              |           |             |             |                          |              |            |              |                   | 10495             |
|               |         |              |              |           |              |          |                          |              |           |             |             |                          |              |            |              |                   | 10496             |
|               |         |              |              |           |              |          |                          |              |           |             |             |                          |              |            |              |                   | 10497             |
|               |         |              |              |           |              |          |                          |              |           |             |             |                          |              |            |              |                   | 10498             |
|               |         |              |              |           |              |          |                          |              |           |             |             |                          |              |            |              |                   | 10499             |
|               |         |              |              |           |              |          |                          |              |           |             |             |                          |              |            |              |                   | 10500             |
|               |         |              |              |           |              |          |                          |              |           |             |             |                          |              |            |              |                   | 10501             |
|               |         |              |              |           |              |          |                          |              |           |             |             |                          |              |            |              |                   | 10502             |
|               |         |              |              |           |              |          |                          |              |           |             |             |                          |              |            |              |                   | 10503             |
|               |         |              |              |           |              |          |                          |              |           |             |             |                          |              |            |              |                   | 10504             |
|               |         |              |              |           |              |          |                          |              |           |             |             |                          |              |            |              |                   | 10505             |
|               |         |              |              |           |              |          |                          |              |           |             |             |                          |              |            |              |                   | 10506             |
|               |         |              |              |           |              |          |                          |              |           |             |             |                          |              |            |              |                   | 10507             |
|               |         |              |              |           |              |          |                          |              |           |             |             |                          |              |            |              |                   | 10508             |
|               |         |              |              |           |              |          |                          |              |           |             |             |                          |              |            |              |                   |                   |
| SubjectMetric |         | DeepConvnet  | EEGNet       | Conformer | CTNet        | BIOT (f) | BIOT (l)                 | BENDR (f)    | BENDR (l) | CBraMod (f) | CBraMod (l) | EEGPT (f)                | EEGPT (l)    | LaBraM (l) | LaBraM (l)   | STEEGformer-s (f) | STEEGformer-s (l) |
| S3            | Pearson | <b>0.095</b> | 0.106        | 0.000     | 0.074        | -0.012   | -0.027                   | 0.001        | 0.024     | 0.043       | 0.070       | 0.017                    | 0.058        | 0.017      | 0.020        | 0.014             | -0.008            |
|               | MSE     | 1.840        | 1.020        | 1.540     | 1.023        | 1.377    | 1.045                    | 1.686        | 1.032     | 1.271       | 1.025       | 1.285                    | 1.028        | 1.472      | <b>1.009</b> | 1.432             | 1.009             |
|               | Pearson | 0.027        | 0.059        | -0.020    | 0.034        | 0.020    | -0.017                   | -0.022       | 0.038     | 0.029       | 0.035       | -0.001                   | <b>0.043</b> | 0.024      | -0.002       | -0.011            | -0.005            |
| S4            | MSE     | 2.190        | <b>0.995</b> | 1.618     | 0.993        | 1.430    | 1.050                    | 1.720        | 1.039     | 1.306       | 1.032       | 1.223                    | 1.005        | 1.489      | 1.002        | 1.277             | 1.002             |
|               | Pearson | 0.032        | <b>0.112</b> | 0.056     | 0.118        | 0.006    | -0.001                   | -0.007       | 0.008     | 0.016       | 0.070       | 0.043                    | 0.098        | 0.021      | 0.057        | 0.054             | 0.045             |
| S5            | MSE     | 2.461        | 0.984        | 1.797     | 0.982        | 1.408    | 0.998                    | 1.588        | 1.015     | 1.310       | 0.999       | 1.235                    | 0.996        | 1.492      | 0.978        | <b>0.975</b>      | 0.975             |
|               | Pearson | <b>0.032</b> | 0.041        | -0.008    | 0.028        | -0.018   | 0.020                    | -0.017       | -0.003    | -0.016      | 0.022       | 0.005                    | 0.031        | 0.007      | 0.005        | 0.012             | 0.029             |
| S6            | MSE     | 1.553        | 1.029        | 1.647     | 1.022        | 1.400    | 1.042                    | 1.596        | 1.040     | 1.295       | 1.040       | 1.265                    | 1.030        | 1.601      | 1.006        | <b>1.009</b>      | 1.010             |
|               | Pearson | -0.013       | -0.004       | 0.019     | 0.018        | 0.004    | -0.037                   | <b>0.033</b> | 0.009     | 0.017       | 0.031       | 0.014                    | 0.018        | 0.009      | 0.036        | 0.006             | -0.011            |
| S7            | MSE     | 1.160        | <b>1.018</b> | 1.767     | 1.008        | 1.455    | 1.063                    | 1.762        | 1.045     | 1.293       | 1.042       | 1.260                    | 1.023        | 1.462      | 1.025        | 1.387             | 1.022             |
|               | Pearson | 0.054        | <b>0.118</b> | 0.024     | 0.128        | -0.006   | -0.018                   | -0.023       | 0.061     | 0.029       | 0.072       | 0.031                    | 0.116        | 0.040      | 0.032        | 0.070             | 0.044             |
| S8            | MSE     | 3.051        | <b>0.975</b> | 1.530     | 0.972        | 1.387    | 1.021                    | 1.597        | 1.001     | 1.273       | 1.014       | 1.204                    | 0.992        | 1.448      | 0.977        | 1.288             | 0.979             |
|               | Pearson | 0.080        | 0.112        | 0.062     | <b>0.103</b> | -0.010   | -0.046                   | 0.004        | 0.056     | 0.025       | 0.043       | 0.031                    | 0.080        | 0.028      | -0.023       | 0.049             | -0.029            |
| S9            | MSE     | 4.961        | 0.995        | 2.123     | 0.991        | 1.396    | 0.998<br>±0.003<br>0.041 | 1.650        | 1.022     | 1.264       | 1.035       | 1.215<br>±0.003<br>0.016 | 1.019        | 1.445      | 0.983        | 1.421             | <b>0.985</b>      |
|               | Pearson | 0.050        | <b>0.044</b> | -0.024    | 0.031        | -0.002   | ±0.009                   | -0.024       | 0.011     | 0.015       | 0.038       | ±0.001                   | 0.029        | 0.015      | 0.032        | 0.017             | 0.038             |

## G.2.2 PER-SUBJECT ZERO-SHOT TRANSFER

Table 79: Average Zero-Shot Transfer Performance Across All Subjects

| Model (Training strategy) | MSE                         | Pearson                     |
|---------------------------|-----------------------------|-----------------------------|
| <b>DeepConvnet</b>        | 2.524<br>$\pm 1.118$        | 0.010<br>$\pm 0.008$        |
| <b>EEGNet</b>             | 1.035<br>$\pm 0.019$        | <b>0.024</b><br>$\pm 0.007$ |
| <b>Conformer</b>          | 1.661<br>$\pm 0.192$        | 0.003<br>$\pm 0.007$        |
| <b>CTNet</b>              | 1.020<br>$\pm 0.013$        | 0.029<br>$\pm 0.008$        |
| <b>BIOT (f)</b>           | 1.436<br>$\pm 0.058$        | 0.002<br>$\pm 0.005$        |
| <b>BIOT (l)</b>           | 1.068<br>$\pm 0.026$        | -0.001<br>$\pm 0.007$       |
| <b>BENDR (f)</b>          | 1.633<br>$\pm 0.087$        | 0.002<br>$\pm 0.007$        |
| <b>BENDR (l)</b>          | 1.031<br>$\pm 0.005$        | 0.012<br>$\pm 0.007$        |
| <b>CBraMod (f)</b>        | 1.317<br>$\pm 0.037$        | 0.005<br>$\pm 0.005$        |
| <b>CBraMod (l)</b>        | 1.029<br>$\pm 0.018$        | 0.020<br>$\pm 0.011$        |
| <b>EEGPT (f)</b>          | 1.266<br>$\pm 0.030$        | 0.007<br>$\pm 0.004$        |
| <b>EEGPT (l)</b>          | 1.053<br>$\pm 0.014$        | 0.018<br>$\pm 0.006$        |
| <b>LaBraM (f)</b>         | 1.501<br>$\pm 0.047$        | 0.011<br>$\pm 0.005$        |
| <b>LaBraM (l)</b>         | 0.996<br>$\pm 0.003$        | 0.010<br>$\pm 0.007$        |
| <b>STEEGformer-s (f)</b>  | 1.373<br>$\pm 0.148$        | 0.009<br>$\pm 0.008$        |
| <b>STEEGformer-s (l)</b>  | <b>0.996</b><br>$\pm 0.003$ | 0.004<br>$\pm 0.006$        |

Table 80: Per-Subject Zero-Shot Transfer Performance

| SubjectMetric |         | DeepConvnet            | EEGNet                 | Conformer        | CTNet                  | BIOT (f)         | BIOT (l)         | BENDR (f)        | BENDR (l)        | CBraMod (f)      | CBraMod (l)            | EEGPT (f)       | EEGPT (l)              | LaBraM (f)      | LaBraM (l)             | STEEGformers (f) | STEEGformers (l)       |
|---------------|---------|------------------------|------------------------|------------------|------------------------|------------------|------------------|------------------|------------------|------------------|------------------------|-----------------|------------------------|-----------------|------------------------|------------------|------------------------|
| S1            | MSE     | 1.660<br>±0.092        | 1.049<br>±0.037        | 1.718<br>±0.089  | 1.008<br>±0.020        | 1.399<br>±0.040  | 1.057<br>±0.038  | 1.668<br>±0.063  | 1.035<br>±0.022  | 1.298<br>±0.057  | 1.058<br>±0.028        | 1.263<br>±0.018 | 1.063<br>±0.034        | 1.501<br>±0.054 | 0.994<br>±0.018        | 1.231<br>±0.044  | <b>0.995</b><br>±0.020 |
|               | Pearson | 0.018<br>±0.034        | 0.022<br>±0.037        | -0.008<br>±0.035 | 0.035<br>±0.025        | 0.005<br>±0.017  | 0.001<br>±0.025  | 0.011<br>±0.011  | 0.021<br>±0.017  | 0.008<br>±0.026  | <b>0.024</b><br>±0.028 | 0.009<br>±0.009 | 0.019<br>±0.023        | 0.014<br>±0.019 | 0.015<br>±0.018        | 0.018<br>±0.025  | 0.004<br>±0.033        |
| S10           | MSE     | 3.898<br>±0.222        | 1.011<br>±0.023        | 1.862<br>±0.116  | 1.017<br>±0.018        | 1.456<br>±0.068  | 1.037<br>±0.037  | 1.644<br>±0.050  | 1.031<br>±0.019  | 1.292<br>±0.047  | 1.005<br>±0.019        | 1.350<br>±0.028 | 1.052<br>±0.023        | 1.606<br>±0.047 | <b>0.997</b><br>±0.018 | 1.493<br>±0.150  | 0.994<br>±0.019        |
|               | Pearson | 0.009<br>±0.023        | 0.015<br>±0.026        | -0.007<br>±0.025 | 0.027<br>±0.022        | 0.003<br>±0.016  | -0.006<br>±0.025 | -0.002<br>±0.022 | 0.011<br>±0.012  | 0.012<br>±0.024  | <b>0.024</b><br>±0.025 | 0.005<br>±0.008 | 0.018<br>±0.018        | 0.012<br>±0.014 | 0.006<br>±0.017        | 0.013<br>±0.026  | 0.016<br>±0.018        |
| S11           | MSE     | 1.118<br>±0.035        | 1.076<br>±0.034        | 1.220<br>±0.050  | 1.042<br>±0.019        | 1.610<br>±0.215  | 1.135<br>±0.076  | 1.349<br>±0.055  | 1.031<br>±0.021  | 1.435<br>±0.051  | 1.008<br>±0.022        | 1.300<br>±0.021 | 1.025<br>±0.029        | 1.612<br>±0.057 | <b>1.001</b><br>±0.020 | 1.387<br>±0.047  | 0.994<br>±0.019        |
|               | Pearson | <b>0.019</b><br>±0.031 | 0.021<br>±0.033        | 0.009<br>±0.028  | 0.007<br>±0.021        | 0.001<br>±0.019  | 0.010<br>±0.019  | -0.002<br>±0.025 | -0.002<br>±0.005 | 0.004<br>±0.021  | -0.015<br>±0.024       | 0.005<br>±0.008 | 0.015<br>±0.018        | 0.005<br>±0.015 | 0.005<br>±0.019        | -0.010<br>±0.022 | 0.007<br>±0.024        |
| S12           | MSE     | 2.640<br>±0.191        | 1.032<br>±0.061        | 1.704<br>±0.122  | 1.012<br>±0.030        | 1.390<br>±0.046  | 1.051<br>±0.023  | 1.523<br>±0.049  | 1.032<br>±0.016  | 1.352<br>±0.047  | 1.054<br>±0.031        | 1.237<br>±0.019 | 1.061<br>±0.089        | 1.515<br>±0.194 | 0.996<br>±0.017        | 1.476<br>±0.082  | <b>1.000</b><br>±0.021 |
|               | Pearson | 0.012<br>±0.028        | 0.023<br>±0.030        | 0.006<br>±0.023  | <b>0.018</b><br>±0.036 | 0.001<br>±0.021  | -0.002<br>±0.025 | 0.005<br>±0.023  | 0.011<br>±0.013  | -0.003<br>±0.020 | 0.004<br>±0.022        | 0.006<br>±0.010 | 0.011<br>±0.032        | 0.003<br>±0.022 | 0.009<br>±0.024        | 0.007<br>±0.022  | -0.002<br>±0.027       |
| S13           | MSE     | 2.191<br>±0.116        | 1.026<br>±0.020        | 1.653<br>±0.099  | 1.012<br>±0.022        | 1.383<br>±0.097  | 1.043<br>±0.029  | 1.598<br>±0.035  | 1.029<br>±0.019  | 1.294<br>±0.058  | 1.020<br>±0.019        | 1.262<br>±0.034 | 1.055<br>±0.041        | 1.454<br>±0.036 | 0.996<br>±0.019        | 1.413<br>±0.047  | <b>1.000</b><br>±0.022 |
|               | Pearson | 0.009<br>±0.037        | 0.017<br>±0.033        | 0.001<br>±0.026  | 0.028<br>±0.028        | 0.004<br>±0.022  | 0.001<br>±0.022  | 0.014<br>±0.018  | 0.020<br>±0.015  | 0.011<br>±0.024  | 0.019<br>±0.020        | 0.009<br>±0.008 | <b>0.023</b><br>±0.018 | 0.012<br>±0.014 | 0.016<br>±0.018        | 0.008<br>±0.026  | 0.008<br>±0.032        |
| S14           | MSE     | 4.237<br>±0.165        | 1.027<br>±0.028        | 1.986<br>±0.120  | 1.009<br>±0.020        | 1.513<br>±0.177  | 1.102<br>±0.060  | 1.668<br>±0.062  | 1.030<br>±0.019  | 1.314<br>±0.053  | 1.031<br>±0.021        | 1.264<br>±0.037 | 1.052<br>±0.028        | 1.482<br>±0.070 | 0.993<br>±0.018        | 1.356<br>±0.059  | <b>0.999</b><br>±0.021 |
|               | Pearson | 0.015<br>±0.024        | 0.031<br>±0.025        | -0.005<br>±0.024 | <b>0.031</b><br>±0.021 | 0.000<br>±0.018  | -0.001<br>±0.023 | -0.007<br>±0.015 | 0.015<br>±0.013  | 0.004<br>±0.020  | 0.035<br>±0.019        | 0.007<br>±0.008 | 0.015<br>±0.022        | 0.017<br>±0.012 | 0.017<br>±0.030        | 0.013<br>±0.019  | 0.002<br>±0.019        |
| S15           | MSE     | 2.369<br>±0.194        | 1.044<br>±0.028        | 1.620<br>±0.056  | 1.013<br>±0.022        | 1.414<br>±0.048  | 1.087<br>±0.053  | 1.748<br>±0.066  | 1.040<br>±0.019  | 1.295<br>±0.059  | 1.053<br>±0.030        | 1.244<br>±0.032 | 1.057<br>±0.034        | 1.472<br>±0.074 | 0.993<br>±0.019        | 1.399<br>±0.064  | <b>0.997</b><br>±0.022 |
|               | Pearson | 0.020<br>±0.023        | <b>0.037</b><br>±0.023 | 0.012<br>±0.019  | 0.046<br>±0.026        | -0.001<br>±0.020 | 0.009<br>±0.028  | 0.001<br>±0.015  | 0.019<br>±0.015  | 0.002<br>±0.031  | 0.034<br>±0.032        | 0.013<br>±0.011 | 0.031<br>±0.022        | 0.015<br>±0.012 | 0.017<br>±0.023        | 0.024<br>±0.037  | 0.004<br>±0.025        |

Continued on next page

| SubjectMetric |         | DeepConvnet      | EEGNet                         | Conformer        | CTNet                          | BIOT (f)         | BIOT (l)         | BENDR (f)        | BENDR (l)        | CBraMod (f)      | CBraMod (l)      | EEGPT (f)       | EEGPT (l)                      | LaBraM (l)      | LaBraM (l)                     | STEEGformer-s (f) | STEEGformer-s (l)              |
|---------------|---------|------------------|--------------------------------|------------------|--------------------------------|------------------|------------------|------------------|------------------|------------------|------------------|-----------------|--------------------------------|-----------------|--------------------------------|-------------------|--------------------------------|
| S16           | MSE     | 3.523<br>±0.252  | 1.048<br>±0.024                | 1.578<br>±0.078  | 1.046<br>±0.023                | 1.409<br>±0.071  | 1.041<br>±0.033  | 1.675<br>±0.042  | 1.037<br>±0.019  | 1.330<br>±0.059  | 1.046<br>±0.026  | 1.267<br>±0.052 | 1.057<br>±0.022                | 1.433<br>±0.036 | <b>0.998</b><br>± <b>0.018</b> | 1.439<br>±0.047   | 0.996<br>± 0.020               |
|               | Pearson | 0.013<br>±0.027  | <b>0.015</b><br>± <b>0.031</b> | -0.000<br>±0.028 | 0.023<br>± 0.025               | 0.008<br>±0.026  | -0.009<br>±0.021 | 0.003<br>±0.021  | -0.000<br>±0.012 | -0.003<br>±0.018 | 0.012<br>±0.022  | 0.000<br>±0.010 | 0.011<br>±0.019                | 0.007<br>±0.013 | 0.001<br>±0.018                | 0.006<br>±0.022   | -0.004<br>±0.020               |
| S17           | MSE     | 1.205<br>±0.045  | 1.045<br>±0.031                | 1.334<br>±0.045  | 1.035<br>±0.023                | 1.396<br>±0.098  | 1.053<br>±0.023  | 1.647<br>±0.039  | 1.024<br>±0.018  | 1.316<br>±0.042  | 1.007<br>±0.019  | 1.285<br>±0.025 | 1.040<br>±0.042                | 1.462<br>±0.053 | <b>0.996</b><br>± <b>0.019</b> | 1.453<br>±0.075   | 0.994<br>± 0.019               |
|               | Pearson | 0.010<br>±0.025  | 0.025<br>±0.025                | 0.002<br>±0.024  | <b>0.032</b><br>± <b>0.016</b> | -0.006<br>±0.019 | -0.000<br>±0.016 | 0.007<br>±0.019  | 0.006<br>±0.011  | 0.008<br>±0.025  | 0.033<br>± 0.021 | 0.012<br>±0.008 | 0.025<br>±0.031                | 0.012<br>±0.014 | 0.002<br>±0.021                | 0.007<br>±0.023   | 0.001<br>±0.031                |
| S18           | MSE     | 3.682<br>±0.240  | 1.053<br>±0.029                | 1.694<br>±0.076  | 1.033<br>±0.025                | 1.401<br>±0.070  | 1.085<br>±0.055  | 1.603<br>±0.039  | 1.030<br>±0.019  | 1.339<br>±0.051  | 1.030<br>±0.025  | 1.276<br>±0.031 | 1.055<br>±0.031                | 1.501<br>±0.075 | 0.998<br>± 0.019               | 1.391<br>±0.062   | <b>0.999</b><br>± <b>0.020</b> |
|               | Pearson | 0.002<br>±0.027  | <b>0.023</b><br>± <b>0.024</b> | 0.003<br>±0.026  | 0.028<br>± 0.024               | -0.006<br>±0.022 | -0.003<br>±0.023 | 0.010<br>±0.017  | 0.014<br>±0.012  | -0.000<br>±0.021 | 0.014<br>±0.025  | 0.005<br>±0.010 | 0.014<br>±0.024                | 0.006<br>±0.015 | 0.007<br>±0.026                | 0.002<br>±0.023   | -0.010<br>±0.022               |
| S2            | MSE     | 2.323<br>±0.187  | 1.015<br>±0.024                | 1.639<br>±0.081  | 1.025<br>±0.023                | 1.413<br>±0.052  | 1.058<br>±0.029  | 1.626<br>±0.043  | 1.026<br>±0.018  | 1.343<br>±0.043  | 1.012<br>±0.023  | 1.292<br>±0.020 | 1.055<br>±0.023                | 1.530<br>±0.082 | 0.993<br>± 0.019               | 1.386<br>±0.037   | <b>0.993</b><br>± <b>0.019</b> |
|               | Pearson | 0.009<br>±0.027  | 0.033<br>± 0.025               | 0.000<br>±0.023  | <b>0.026</b><br>± <b>0.025</b> | 0.009<br>±0.018  | 0.007<br>±0.017  | -0.013<br>±0.023 | 0.014<br>±0.015  | 0.005<br>±0.027  | 0.021<br>±0.029  | 0.005<br>±0.009 | 0.018<br>±0.022                | 0.008<br>±0.016 | 0.014<br>±0.023                | 0.005<br>±0.024   | 0.002<br>±0.016                |
| S3            | MSE     | 1.682<br>±0.168  | 1.030<br>±0.028                | 1.476<br>±0.054  | 1.011<br>±0.020                | 1.488<br>±0.131  | 1.039<br>±0.025  | 1.713<br>±0.044  | 1.031<br>±0.018  | 1.303<br>±0.039  | 1.013<br>±0.024  | 1.301<br>±0.024 | 1.071<br>±0.044                | 1.517<br>±0.033 | <b>0.994</b><br>± <b>0.019</b> | 1.492<br>±0.049   | 0.993<br>± 0.019               |
|               | Pearson | 0.011<br>±0.028  | <b>0.028</b><br>± <b>0.023</b> | 0.008<br>±0.018  | 0.034<br>± 0.030               | -0.006<br>±0.025 | 0.009<br>±0.018  | 0.002<br>±0.019  | 0.010<br>±0.020  | 0.011<br>±0.023  | 0.020<br>±0.030  | 0.002<br>±0.009 | 0.017<br>±0.016                | 0.011<br>±0.015 | 0.017<br>±0.022                | 0.019<br>±0.017   | 0.004<br>±0.029                |
| S4            | MSE     | 2.074<br>±0.104  | 1.020<br>±0.026                | 1.689<br>±0.125  | 1.018<br>±0.025                | 1.419<br>±0.070  | 1.087<br>±0.040  | 1.721<br>±0.055  | 1.027<br>±0.019  | 1.276<br>±0.037  | 1.041<br>±0.040  | 1.244<br>±0.037 | 1.032<br>±0.025                | 1.476<br>±0.072 | 0.993<br>± 0.018               | 1.426<br>±0.110   | <b>0.995</b><br>± <b>0.019</b> |
|               | Pearson | -0.004<br>±0.030 | 0.012<br>±0.035                | -0.004<br>±0.027 | 0.025<br>± 0.027               | 0.005<br>±0.016  | -0.010<br>±0.022 | -0.005<br>±0.021 | 0.009<br>±0.013  | 0.006<br>±0.016  | 0.018<br>±0.031  | 0.007<br>±0.011 | <b>0.022</b><br>± <b>0.029</b> | 0.002<br>±0.011 | 0.017<br>±0.031                | 0.007<br>±0.020   | 0.010<br>±0.030                |
| S5            | MSE     | 2.327<br>±0.095  | 1.011<br>±0.021                | 1.711<br>±0.130  | 1.004<br>±0.020                | 1.485<br>±0.168  | 1.088<br>±0.105  | 1.593<br>±0.045  | 1.028<br>±0.019  | 1.330<br>±0.038  | 1.010<br>±0.021  | 1.241<br>±0.036 | 1.032<br>±0.029                | 1.490<br>±0.030 | 0.996<br>±0.018                | 0.993<br>± 0.020  | <b>0.995</b><br>± <b>0.020</b> |
|               | Pearson | 0.000<br>±0.024  | <b>0.024</b><br>± <b>0.027</b> | 0.016<br>±0.024  | 0.032<br>± 0.025               | 0.004<br>±0.019  | -0.004<br>±0.016 | 0.001<br>±0.021  | 0.008<br>±0.012  | 0.006<br>±0.017  | 0.021<br>±0.022  | 0.003<br>±0.008 | 0.020<br>±0.017                | 0.019<br>±0.014 | 0.006<br>±0.020                | 0.009<br>±0.022   | 0.002<br>±0.029                |
| S6            | MSE     | 1.465<br>±0.091  | 1.014<br>±0.023                | 1.692<br>±0.089  | 1.007<br>±0.021                | 1.373<br>±0.061  | 1.097<br>±0.103  | 1.654<br>±0.071  | 1.026<br>±0.019  | 1.271<br>±0.037  | 1.017<br>±0.018  | 1.252<br>±0.042 | 1.040<br>±0.019                | 1.545<br>±0.061 | <b>0.993</b><br>± <b>0.019</b> | 0.991<br>± 0.020  | 0.994<br>±0.020                |

Continued on next page

297



## G.3 LEAVE-ONE-OUT RESULTS

## G.3.1 LEAVE-ONE-OUT ZERO-SHOT EVALUATION

Table 81: Average Leave-One-Out Zero-Shot Performance Across All Subjects.

| Model (Training strategy) | MSE                         | Pearson                     |
|---------------------------|-----------------------------|-----------------------------|
| <b>DeepConvnet</b>        | 0.999<br>$\pm 0.020$        | 0.039<br>$\pm 0.033$        |
| <b>EEGNet</b>             | 0.994<br>$\pm 0.018$        | 0.042<br>$\pm 0.029$        |
| <b>Conformer</b>          | 1.024<br>$\pm 0.028$        | 0.017<br>$\pm 0.025$        |
| <b>CTNet</b>              | <b>0.993</b><br>$\pm 0.017$ | 0.048<br>$\pm 0.032$        |
| <b>BIOT (f)</b>           | 1.315<br>$\pm 0.052$        | 0.006<br>$\pm 0.015$        |
| <b>BIOT (l)</b>           | 1.000<br>$\pm 0.019$        | -0.000<br>$\pm 0.018$       |
| <b>BENDR (f)</b>          | 1.616<br>$\pm 0.055$        | 0.010<br>$\pm 0.021$        |
| <b>BENDR (l)</b>          | 0.995<br>$\pm 0.018$        | 0.039<br>$\pm 0.019$        |
| <b>CBraMod (f)</b>        | 1.431<br>$\pm 0.065$        | 0.005<br>$\pm 0.024$        |
| <b>CBraMod (l)</b>        | 0.996<br>$\pm 0.018$        | 0.039<br>$\pm 0.024$        |
| <b>EEGPT (f)</b>          | 0.994<br>$\pm 0.017$        | 0.043<br>$\pm 0.032$        |
| <b>EEGPT (l)</b>          | 0.994<br>$\pm 0.017$        | <b>0.047</b><br>$\pm 0.033$ |
| <b>LaBraM (f)</b>         | 1.638<br>$\pm 0.055$        | 0.011<br>$\pm 0.013$        |
| <b>LaBraM (l)</b>         | 0.993<br>$\pm 0.018$        | 0.024<br>$\pm 0.021$        |
| <b>STEEGformer-s (f)</b>  | 1.237<br>$\pm 0.039$        | 0.010<br>$\pm 0.020$        |
| <b>STEEGformer-s (l)</b>  | <b>0.993</b><br>$\pm 0.019$ | 0.016<br>$\pm 0.031$        |

10716  
10717  
10718  
10719  
10720  
10721  
10722  
10723  
10724  
10725  
10726  
10727  
10728  
10729  
10730  
10731  
10732  
10733  
10734  
10735  
10736  
10737  
10738  
10739  
10740  
10741  
10742  
10743  
10744  
10745  
10746  
10747  
10748

Table 82: Per-Subject Leave-One-Out Zero-Shot Performance.

| SubjectMetric          |         | DeepConvnet  | EEGNet       | Conformer                | CTNet                                          | BIOT (f)                 | BIOT (f)                 | BENDR (f)    | BENDR (f) | CBraMod (f) | CBraMod (f) | EEGPT (f)                                      | EEGPT (f) | LaBraM (f) | LaBraM (f)   | STEEGformer-s (f) | STEEGformer-s (f) |
|------------------------|---------|--------------|--------------|--------------------------|------------------------------------------------|--------------------------|--------------------------|--------------|-----------|-------------|-------------|------------------------------------------------|-----------|------------|--------------|-------------------|-------------------|
| S1                     | MSE     | <b>1.004</b> | 1.004        | 1.023                    | 1.003                                          | 1.338                    | 1.021                    | 1.668        | 1.009     | 1.504       | 1.005       | 1.011                                          | 1.008     | 1.652      | 1.007        | 1.199             | 1.009             |
|                        | Pearson | <b>0.089</b> | 0.083        | 0.056                    | 0.090                                          | 0.011                    | -0.040                   | 0.026        | 0.055     | -0.004      | 0.074       | 0.044                                          | 0.069     | 0.028      | 0.067        | 0.062             | 0.023             |
| S10                    | MSE     | 0.988        | 0.986        | 1.000                    | 0.986                                          | 1.287                    | 0.991                    | 1.633        | 0.983     | 1.453       | 0.988       | 0.981                                          | 0.985     | 1.597      | <b>0.982</b> | 1.204             | 0.983             |
|                        | Pearson | 0.007        | 0.011        | 0.012                    | 0.012                                          | -0.003                   | -0.012                   | 0.006        | 0.030     | -0.006      | -0.008      | <b>0.024</b>                                   | 0.022     | 0.009      | 0.007        | 0.015             | -0.046            |
| S11                    | MSE     | 1.037        | 0.983        | 1.029                    | 0.981                                          | 1.231                    | 0.993                    | 1.744        | 0.983     | 1.217       | 0.996       | 0.993                                          | 1.001     | 1.469      | 0.978        | 1.228             | <b>0.980</b>      |
|                        | Pearson | -0.045       | 0.009        | 0.000                    | 0.028                                          | 0.003                    | -0.012                   | <b>0.028</b> | 0.011     | 0.011       | -0.007      | 0.021                                          | -0.012    | -0.013     | 0.014        | 0.018             | 0.033             |
| S12                    | MSE     | 0.967        | <b>0.964</b> | 0.983                    | 0.966                                          | 1.314                    | 0.974                    | 1.621        | 0.969     | 1.411       | 0.966       | 0.969                                          | 0.965     | 1.633      | 0.966        | 1.217             | 0.960             |
|                        | Pearson | 0.040        | 0.048        | 0.028                    | <b>0.053</b>                                   | -0.015                   | -0.016                   | 0.005        | 0.026     | -0.003      | 0.034       | 0.030                                          | 0.051     | 0.019      | 0.022        | -0.001            | 0.076             |
| S13                    | MSE     | 0.980        | 0.981        | 1.002                    | 0.981                                          | 1.288<br>±0.014<br>0.024 | 0.988<br>±0.004<br>0.003 | 1.608        | 0.982     | 1.437       | 0.984       | <b>0.979</b>                                   | 0.978     | 1.591      | 0.982        | 1.243             | 0.981             |
|                        | Pearson | 0.069        | 0.069        | <b>0.077</b>             | 0.072                                          | ±0.004                   | ±0.020                   | 0.009        | 0.057     | -0.000      | 0.049       | 0.071                                          | 0.084     | 0.029      | 0.031        | -0.004            | 0.028             |
| S14                    | MSE     | 1.019        | 1.013        | 1.036                    | <b>1.013</b><br>± <b>0.000</b><br><b>0.055</b> | 1.338                    | 1.018                    | 1.627        | 1.012     | 1.473       | 1.015       | 1.013                                          | 1.015     | 1.634      | 1.014        | 1.302             | 1.013             |
|                        | Pearson | 0.041        | 0.054        | 0.025                    | ± <b>0.000</b>                                 | -0.018                   | -0.003                   | 0.023        | 0.063     | 0.015       | 0.042       | 0.051                                          | 0.048     | 0.014      | 0.009        | -0.008            | -0.002            |
| S15                    | MSE     | 1.012        | 1.013        | 1.047                    | 1.009                                          | 1.425                    | 1.016                    | 1.618        | 1.008     | 1.562       | 1.004       | <b>1.006</b><br>± <b>0.001</b><br><b>0.080</b> | 1.006     | 1.651      | 1.007        | 1.217             | 1.008             |
|                        | Pearson | 0.055        | 0.038        | 0.009                    | 0.057                                          | -0.001                   | 0.009                    | -0.026       | 0.063     | -0.071      | 0.085       | ± <b>0.008</b>                                 | 0.074     | 0.019      | 0.065        | 0.025             | 0.059             |
| S16                    | MSE     | <b>0.968</b> | 0.966        | 0.987<br>±0.000<br>0.039 | 0.968                                          | 1.334                    | 0.974                    | 1.475        | 0.971     | 1.418       | 0.972       | 0.969                                          | 0.968     | 1.611      | 0.972        | 1.188             | 0.969             |
|                        | Pearson | 0.045        | 0.058        | ±0.000                   | <b>0.055</b>                                   | -0.010                   | 0.009                    | 0.050        | 0.029     | -0.000      | 0.027       | 0.033                                          | 0.048     | 0.014      | 0.008        | 0.007             | 0.018             |
| S17                    | MSE     | 1.007        | 1.006        | 1.030                    | 1.004                                          | 1.357<br>±0.033<br>0.003 | 1.013<br>±0.000<br>0.027 | 1.647        | 1.008     | 1.410       | 1.007       | 1.005                                          | 1.003     | 1.642      | 1.006        | 1.292             | <b>1.004</b>      |
|                        | Pearson | 0.041        | 0.035        | 0.011                    | <b>0.044</b>                                   | ±0.006                   | ±0.008                   | -0.021       | 0.036     | -0.004      | 0.041       | 0.039                                          | 0.053     | 0.004      | 0.003        | -0.012            | 0.027             |
| Continued on next page |         |              |              |                          |                                                |                          |                          |              |           |             |             |                                                |           |            |              |                   |                   |

|               |         |                   |                          |                           |              |        |        |        |       |                           |              |                           |                          |                          |                          |                          |              |       |
|---------------|---------|-------------------|--------------------------|---------------------------|--------------|--------|--------|--------|-------|---------------------------|--------------|---------------------------|--------------------------|--------------------------|--------------------------|--------------------------|--------------|-------|
|               |         |                   |                          |                           |              |        |        |        |       |                           |              |                           |                          |                          |                          |                          |              | 10749 |
|               |         |                   |                          |                           |              |        |        |        |       |                           |              |                           |                          |                          |                          |                          |              | 10750 |
|               |         |                   |                          |                           |              |        |        |        |       |                           |              |                           |                          |                          |                          |                          |              | 10751 |
|               |         |                   |                          |                           |              |        |        |        |       |                           |              |                           |                          |                          |                          |                          |              | 10752 |
|               |         |                   |                          |                           |              |        |        |        |       |                           |              |                           |                          |                          |                          |                          |              | 10753 |
|               |         |                   |                          |                           |              |        |        |        |       |                           |              |                           |                          |                          |                          |                          |              | 10754 |
|               |         |                   |                          |                           |              |        |        |        |       |                           |              |                           |                          |                          |                          |                          |              | 10755 |
|               |         |                   |                          |                           |              |        |        |        |       |                           |              |                           |                          |                          |                          |                          |              | 10756 |
|               |         |                   |                          |                           |              |        |        |        |       |                           |              |                           |                          |                          |                          |                          |              | 10757 |
|               |         |                   |                          |                           |              |        |        |        |       |                           |              |                           |                          |                          |                          |                          |              | 10758 |
|               |         |                   |                          |                           |              |        |        |        |       |                           |              |                           |                          |                          |                          |                          |              | 10759 |
|               |         |                   |                          |                           |              |        |        |        |       |                           |              |                           |                          |                          |                          |                          |              | 10760 |
|               |         |                   |                          |                           |              |        |        |        |       |                           |              |                           |                          |                          |                          |                          |              | 10761 |
|               |         |                   |                          |                           |              |        |        |        |       |                           |              |                           |                          |                          |                          |                          |              | 10762 |
|               |         |                   |                          |                           |              |        |        |        |       |                           |              |                           |                          |                          |                          |                          |              | 10763 |
|               |         |                   |                          |                           |              |        |        |        |       |                           |              |                           |                          |                          |                          |                          |              | 10764 |
|               |         |                   |                          |                           |              |        |        |        |       |                           |              |                           |                          |                          |                          |                          |              | 10765 |
|               |         |                   |                          |                           |              |        |        |        |       |                           |              |                           |                          |                          |                          |                          |              | 10766 |
|               |         |                   |                          |                           |              |        |        |        |       |                           |              |                           |                          |                          |                          |                          |              | 10767 |
|               |         |                   |                          |                           |              |        |        |        |       |                           |              |                           |                          |                          |                          |                          |              | 10768 |
|               |         |                   |                          |                           |              |        |        |        |       |                           |              |                           |                          |                          |                          |                          |              | 10769 |
|               |         |                   |                          |                           |              |        |        |        |       |                           |              |                           |                          |                          |                          |                          |              | 10770 |
|               |         |                   |                          |                           |              |        |        |        |       |                           |              |                           |                          |                          |                          |                          |              | 10771 |
|               |         |                   |                          |                           |              |        |        |        |       |                           |              |                           |                          |                          |                          |                          |              | 10772 |
|               |         |                   |                          |                           |              |        |        |        |       |                           |              |                           |                          |                          |                          |                          |              | 10773 |
|               |         |                   |                          |                           |              |        |        |        |       |                           |              |                           |                          |                          |                          |                          |              | 10774 |
|               |         |                   |                          |                           |              |        |        |        |       |                           |              |                           |                          |                          |                          |                          |              | 10775 |
|               |         |                   |                          |                           |              |        |        |        |       |                           |              |                           |                          |                          |                          |                          |              | 10776 |
|               |         |                   |                          |                           |              |        |        |        |       |                           |              |                           |                          |                          |                          |                          |              | 10777 |
|               |         |                   |                          |                           |              |        |        |        |       |                           |              |                           |                          |                          |                          |                          |              | 10778 |
|               |         |                   |                          |                           |              |        |        |        |       |                           |              |                           |                          |                          |                          |                          |              | 10779 |
|               |         |                   |                          |                           |              |        |        |        |       |                           |              |                           |                          |                          |                          |                          |              | 10780 |
|               |         |                   |                          |                           |              |        |        |        |       |                           |              |                           |                          |                          |                          |                          |              | 10781 |
| SubjectMetric |         | DeepConvnet       |                          |                           |              |        |        |        |       |                           |              |                           |                          |                          |                          |                          |              |       |
|               |         | EEGNet            |                          |                           |              |        |        |        |       |                           |              |                           |                          |                          |                          |                          |              |       |
|               |         | Conformer         |                          |                           |              |        |        |        |       |                           |              |                           |                          |                          |                          |                          |              |       |
|               |         | CTNet             |                          |                           |              |        |        |        |       |                           |              |                           |                          |                          |                          |                          |              |       |
|               |         | BIOT (f)          |                          |                           |              |        |        |        |       |                           |              |                           |                          |                          |                          |                          |              |       |
|               |         | BIOT (l)          |                          |                           |              |        |        |        |       |                           |              |                           |                          |                          |                          |                          |              |       |
|               |         | BENDR (f)         |                          |                           |              |        |        |        |       |                           |              |                           |                          |                          |                          |                          |              |       |
|               |         | BENDR (l)         |                          |                           |              |        |        |        |       |                           |              |                           |                          |                          |                          |                          |              |       |
|               |         | CBraMod (f)       |                          |                           |              |        |        |        |       |                           |              |                           |                          |                          |                          |                          |              |       |
|               |         | CBraMod (l)       |                          |                           |              |        |        |        |       |                           |              |                           |                          |                          |                          |                          |              |       |
|               |         | EEGPT (f)         |                          |                           |              |        |        |        |       |                           |              |                           |                          |                          |                          |                          |              |       |
|               |         | EEGPT (l)         |                          |                           |              |        |        |        |       |                           |              |                           |                          |                          |                          |                          |              |       |
|               |         | LaBraM (f)        |                          |                           |              |        |        |        |       |                           |              |                           |                          |                          |                          |                          |              |       |
|               |         | LaBraM (l)        |                          |                           |              |        |        |        |       |                           |              |                           |                          |                          |                          |                          |              |       |
|               |         | STEEGformer-s (f) |                          |                           |              |        |        |        |       |                           |              |                           |                          |                          |                          |                          |              |       |
|               |         | STEEGformer-s (l) |                          |                           |              |        |        |        |       |                           |              |                           |                          |                          |                          |                          |              |       |
| S18           | MSE     | 0.973             | 0.973<br>±0.000<br>0.017 | 1.012                     | 0.973        | 1.252  | 0.973  | 1.575  | 0.972 | 1.406                     | <b>0.970</b> | 0.971                     | 0.974                    | 1.725                    | 0.970                    | 1.186                    | 0.966        |       |
|               | Pearson | 0.023             | ±0.000                   | -0.022                    | 0.011        | -0.003 | -0.000 | 0.018  | 0.030 | 0.025                     | <b>0.035</b> | 0.013                     | 0.013                    | -0.022                   | -0.001                   | 0.012                    | 0.042        |       |
| S2            | MSE     | 1.023             | 1.018                    | 1.054                     | 1.017        | 1.286  | 1.025  | 1.668  | 1.021 | 1.472                     | 1.021        | 1.018                     | 1.021                    | 1.688                    | <b>1.017</b>             | 1.254                    | 1.019        |       |
|               | Pearson | 0.039             | 0.058                    | -0.010                    | 0.065        | -0.001 | -0.016 | -0.019 | 0.043 | -0.012                    | 0.038        | <b>0.060</b>              | 0.042                    | 0.016                    | 0.049                    | 0.001                    | 0.018        |       |
| S3            | MSE     | 1.009             | 1.010                    | 1.022<br>±0.009<br>0.039  | 1.010        | 1.382  | 1.010  | 1.524  | 1.007 | 1.418                     | 1.013        | 1.006                     | <b>1.005</b>             | 1.632                    | 1.008                    | 1.317                    | 1.004        |       |
|               | Pearson | 0.045             | 0.035                    | ±0.029                    | 0.034        | 0.002  | 0.024  | 0.034  | 0.050 | 0.029                     | 0.029        | 0.053                     | <b>0.062</b>             | 0.021                    | 0.007                    | -0.016                   | 0.064        |       |
| S4            | MSE     | 1.006             | 1.005                    | 1.046                     | 1.005        | 1.254  | 1.012  | 1.632  | 1.010 | 1.451<br>±0.039<br>-0.004 | 1.004        | <b>1.003</b>              | 1.003                    | 1.714                    | 1.005<br>±0.000<br>0.036 | 1.244                    | 1.004        |       |
|               | Pearson | 0.048             | 0.047                    | 0.014                     | 0.049        | 0.001  | -0.010 | 0.006  | 0.022 | ±0.027                    | <b>0.060</b> | 0.055                     | 0.065                    | -0.002                   | ±0.000                   | 0.001                    | 0.019        |       |
| S5            | MSE     | 0.979             | 0.977                    | 0.985                     | 0.976        | 1.257  | 0.979  | 1.625  | 0.982 | 1.410                     | <b>0.976</b> | 0.980                     | 0.981                    | 1.632                    | 0.977                    | 1.197                    | 0.976        |       |
|               | Pearson | 0.050             | 0.046                    | 0.046                     | 0.045        | 0.036  | 0.010  | -0.014 | 0.018 | 0.029                     | <b>0.047</b> | 0.015                     | 0.019                    | 0.020                    | 0.008                    | 0.027                    | -0.009       |       |
| S6            | MSE     | 1.021             | 1.019                    | 1.057                     | 1.016        | 1.300  | 1.014  | 1.581  | 1.015 | 1.417                     | 1.016        | 1.012                     | 1.016<br>±0.000<br>0.008 | 1.709<br>±0.018<br>0.005 | 1.006                    | 1.238<br>±0.011<br>0.029 | <b>1.009</b> |       |
|               | Pearson | 0.001             | -0.006                   | -0.005                    | 0.001        | 0.038  | -0.027 | 0.037  | 0.004 | 0.041                     | 0.008        | 0.009                     | ±0.004                   | ±0.004                   | <b>0.040</b>             | ±0.021                   | -0.024       |       |
| S7            | MSE     | 1.011             | 1.014                    | 1.091                     | 1.009        | 1.326  | 1.031  | 1.624  | 1.020 | 1.446                     | 1.024        | 1.013                     | <b>1.010</b>             | 1.640                    | 1.024                    | 1.280                    | 1.024        |       |
|               | Pearson | 0.114             | 0.120                    | 0.006                     | 0.143        | 0.009  | 0.004  | 0.009  | 0.079 | 0.024                     | 0.070        | <b>0.139</b>              | 0.137                    | 0.023                    | 0.045                    | 0.016                    | -0.008       |       |
| S8            | MSE     | 0.977             | 0.976                    | 1.002<br>±0.001<br>-0.012 | <b>0.974</b> | 1.309  | 0.978  | 1.621  | 0.976 | 1.438                     | 0.977        | 0.973                     | 0.976                    | 1.652                    | 0.975                    | 1.202                    | 0.975        |       |
|               | Pearson | 0.028             | 0.025                    | ±0.005                    | 0.037        | 0.025  | 0.013  | -0.007 | 0.038 | -0.002                    | 0.031        | 0.046                     | <b>0.041</b>             | -0.003                   | -0.001                   | 0.027                    | -0.014       |       |
| S9            | MSE     | 0.995             | 0.991                    | 1.034                     | 0.987        | 1.399  | 0.985  | 1.601  | 0.983 | 1.418                     | <b>0.982</b> | 0.990<br>±0.000<br>-0.011 | 0.986<br>±0.000<br>0.027 | 1.619                    | 0.982                    | 1.259                    | 0.982        |       |
|               | Pearson | 0.019             | 0.012                    | 0.000                     | 0.019        | 0.007  | 0.029  | 0.013  | 0.051 | 0.031                     | <b>0.047</b> | ±0.002                    | ±0.003                   | 0.009                    | 0.026                    | -0.022                   | -0.007       |       |

## G.3.2 LEAVE-ONE-OUT FINE-TUNING RESULTS

Table 83: Average Leave-One-Out Fine-Tuned Performance Across All Subjects.

| Model (Training strategy) | MSE                         | Pearson                     |
|---------------------------|-----------------------------|-----------------------------|
| <b>DeepConvnet</b>        | 1.086<br>$\pm 0.036$        | 0.025<br>$\pm 0.030$        |
| <b>EEGNet</b>             | 1.017<br>$\pm 0.029$        | 0.031<br>$\pm 0.032$        |
| <b>Conformer</b>          | 1.230<br>$\pm 0.065$        | 0.015<br>$\pm 0.025$        |
| <b>CTNet</b>              | 1.021<br>$\pm 0.028$        | <b>0.033</b><br>$\pm 0.035$ |
| <b>BIOT (f)</b>           | 1.438<br>$\pm 0.038$        | -0.000<br>$\pm 0.012$       |
| <b>BIOT (l)</b>           | 1.045<br>$\pm 0.036$        | 0.000<br>$\pm 0.025$        |
| <b>BENDR (f)</b>          | 1.507<br>$\pm 0.076$        | -0.003<br>$\pm 0.017$       |
| <b>BENDR (l)</b>          | 1.024<br>$\pm 0.025$        | 0.018<br>$\pm 0.013$        |
| <b>CBraMod (f)</b>        | 1.277<br>$\pm 0.029$        | 0.009<br>$\pm 0.015$        |
| <b>CBraMod (l)</b>        | 1.017<br>$\pm 0.031$        | <b>0.032</b><br>$\pm 0.031$ |
| <b>EEGPT (f)</b>          | <b>1.005</b><br>$\pm 0.027$ | 0.032<br>$\pm 0.025$        |
| <b>EEGPT (l)</b>          | 1.028<br>$\pm 0.030$        | 0.023<br>$\pm 0.034$        |
| <b>LaBraM (f)</b>         | 1.345<br>$\pm 0.043$        | 0.013<br>$\pm 0.008$        |
| <b>LaBraM (l)</b>         | <b>0.998</b><br>$\pm 0.025$ | 0.017<br>$\pm 0.033$        |
| <b>STEEGformer-s (f)</b>  | 1.110<br>$\pm 0.031$        | 0.013<br>$\pm 0.017$        |
| <b>STEEGformer-s (l)</b>  | 1.027<br>$\pm 0.063$        | 0.015<br>$\pm 0.026$        |

Table 84: Per-Subject Leave-One-Out Fine-Tuned Performance.

| SubjectMetric          |         | DeepConvnet | EEGNet          | Conformer                 | CTNet                    | BIOT (f) | BIOT (l) | BENDR (f) | BENDR (l) | CBraMod (f)  | CBraMod (l)  | EEGPT (f)    | EEGPT (l)    | LaBraM (f) | LaBraM (l)   | STEEGformer-s (f) | STEEGformer-s (l) |
|------------------------|---------|-------------|-----------------|---------------------------|--------------------------|----------|----------|-----------|-----------|--------------|--------------|--------------|--------------|------------|--------------|-------------------|-------------------|
| S1                     | MSE     | 1.101       | 1.001           | 1.258                     | 1.011                    | 1.422    | 1.031    | 1.461     | 1.009     | 1.271        | 1.014        | <b>0.994</b> | 1.017        | 1.323      | 0.989        | 1.084             | 0.996             |
|                        | Pearson | 0.012       | 0.057           | 0.015                     | 0.048                    | 0.010    | 0.019    | -0.011    | 0.047     | 0.012        | 0.042        | 0.066        | <b>0.061</b> | 0.012      | 0.038        | 0.034             | 0.043             |
| S10                    | MSE     | 1.075       | 0.993           | 1.305                     | 1.004                    | 1.391    | 1.031    | 1.446     | 1.016     | 1.269        | 1.014        | 0.988        | 1.006        | 1.333      | 0.982        | 1.104             | <b>0.984</b>      |
|                        | Pearson | -0.017      | 0.020           | -0.040                    | -0.012                   | 0.005    | -0.020   | -0.012    | 0.011     | 0.007        | -0.007       | 0.026        | <b>0.034</b> | 0.022      | 0.042        | -0.001            | -0.004            |
| S11                    | MSE     | 1.160       | 1.047           | 1.113                     | 1.042                    | 1.507    | 1.036    | 1.759     | 1.040     | 1.247        | <b>1.006</b> | 1.004        | 1.013        | 1.466      | 1.025        | 1.146             | 1.256             |
|                        | Pearson | 0.030       | <b>0.045</b>    | 0.003                     | 0.041                    | -0.011   | -0.057   | -0.015    | 0.013     | -0.005       | 0.013        | 0.051        | 0.004        | -0.007     | 0.016        | 0.030             | 0.004             |
| S12                    | MSE     | 1.032       | <b>0.976</b>    | 1.154                     | 0.988                    | 1.482    | 1.031    | 1.456     | 1.005     | 1.271        | 0.993        | 0.975        | 0.999        | 1.276      | 0.984        | 1.085             | 1.012             |
|                        | Pearson | 0.039       | 0.071           | 0.054                     | 0.049                    | -0.022   | -0.021   | -0.003    | 0.012     | 0.011        | 0.058        | <b>0.058</b> | 0.029        | 0.019      | -0.028       | 0.026             | 0.001             |
| S13                    | MSE     | 1.111       | 1.055           | 1.254                     | 1.046                    | 1.462    | 1.090    | 1.510     | 1.053     | 1.312        | 1.038        | <b>1.035</b> | 1.038        | 1.384      | 1.022        | 1.145             | 1.035             |
|                        | Pearson | 0.038       | 0.039           | 0.025                     | 0.042                    | 0.002    | -0.021   | 0.006     | 0.019     | -0.004       | 0.030        | <b>0.043</b> | 0.049        | 0.011      | 0.007        | -0.002            | -0.013            |
| S14                    | MSE     | 1.108       | 1.022           | 1.261                     | 1.020<br>±0.000<br>0.030 | 1.497    | 1.094    | 1.456     | 1.033     | 1.298        | 1.021        | 1.007        | 1.045        | 1.323      | 0.996        | 1.133             | <b>1.005</b>      |
|                        | Pearson | 0.018       | 0.017           | 0.037                     | ±0.000                   | -0.014   | 0.040    | 0.000     | 0.016     | 0.016        | 0.059        | 0.028        | 0.005        | 0.026      | <b>0.059</b> | 0.014             | 0.077             |
| S15                    | MSE     | 1.115       | 1.007           | 1.268                     | 1.006                    | 1.435    | 1.006    | 1.431     | 1.001     | 1.263        | 0.990        | 0.992        | 0.994        | 1.361      | 0.971        | 1.060             | <b>0.979</b>      |
|                        | Pearson | 0.033       | 0.061           | 0.024                     | 0.080                    | -0.006   | 0.012    | 0.046     | 0.038     | 0.002        | <b>0.098</b> | 0.084        | 0.107        | 0.011      | 0.060        | 0.046             | 0.023             |
| S16                    | MSE     | 1.053       | 1.011           | 1.317<br>±0.000<br>-0.017 | 1.011                    | 1.427    | 1.001    | 1.496     | 1.005     | 1.283        | 1.010        | 0.983        | 1.009        | 1.312      | 0.985        | 1.092             | <b>0.984</b>      |
|                        | Pearson | 0.043       | 0.015           | ±0.000                    | 0.033                    | 0.015    | 0.035    | -0.007    | 0.027     | 0.014        | 0.012        | <b>0.036</b> | 0.023        | 0.005      | -0.000       | 0.003             | -0.021            |
| S17                    | MSE     | 1.113       | 1.042           | 1.164                     | 1.048                    | 1.427    | 1.037    | 1.577     | 1.042     | 1.279        | 1.013        | 1.034        | 1.065        | 1.354      | 1.015        | 1.144             | <b>1.015</b>      |
|                        | Pearson | 0.016       | 0.023           | 0.009                     | 0.023                    | -0.001   | 0.017    | -0.006    | 0.012     | <b>0.031</b> | 0.060        | 0.013        | 0.003        | 0.013      | -0.019       | -0.014            | -0.010            |
| S18                    | MSE     | 1.097       | 1.010<br>±0.000 | 1.215                     | 1.012                    | 1.462    | 1.062    | 1.504     | 1.001     | 1.268        | 0.991        | <b>0.987</b> | 1.028        | 1.302      | 0.972        | 1.100             | 1.066             |
| Continued on next page |         |             |                 |                           |                          |          |          |           |           |              |              |              |              |            |              |                   |                   |

| SubjectMetric |         | DeepConvnet | EEGNet       | Conformer | CTNet  | BIOT (f) | BIOT (l) | BENDR (f) | BENDR (l) | CBraMod (f) | CBraMod (l) | EEGPT (f)     | EEGPT (l)     | LaBraM (f) | LaBraM (l) | STEEGformer-s (f) | STEEGformer-s (l) |
|---------------|---------|-------------|--------------|-----------|--------|----------|----------|-----------|-----------|-------------|-------------|---------------|---------------|------------|------------|-------------------|-------------------|
| S2            | Pearson | 0.006       | 0.003 ±0.000 | 0.021     | 0.011  | -0.023   | -0.048   | 0.005     | 0.014     | 0.007       | 0.018       | -0.008        | -0.017        | 0.022      | 0.039      | -0.013            | 0.022             |
|               | MSE     | 1.086       | 0.978        | 1.162     | 1.002  | 1.371    | 1.023    | 1.483     | 0.989     | 1.252       | 1.000       | 0.964         | 0.999         | 1.347      | 0.973      | 1.092             | 1.030             |
|               | Pearson | 0.004       | 0.001        | 0.002     | -0.001 | -0.003   | -0.005   | 0.007     | 0.023     | -0.006      | -0.001      | 0.041         | 0.007         | 0.015      | -0.037     | 0.000             | 0.003             |
| S3            | MSE     | 1.036       | 1.010        | 1.192     | 1.029  | 1.499    | 1.073    | 1.553     | 1.041     | 1.341       | 1.022       | 1.021         | 1.045         | 1.371      | 1.014      | 1.135             | 1.044             |
|               | Pearson | 0.091       | 0.088        | 0.013     | 0.074  | 0.014    | 0.017    | 0.009     | 0.025     | 0.003       | 0.062       | 0.042         | 0.040         | 0.020      | 0.040      | 0.010             | 0.055             |
| S4            | MSE     | 1.105       | 1.034        | 1.336     | 1.053  | 1.438    | 1.040    | 1.460     | 1.049     | 1.293       | 1.035       | 1.022         | 1.052         | 1.356      | 1.018      | 1.113             | 1.014             |
|               | Pearson | -0.002      | -0.014       | 0.018     | -0.018 | -0.003   | 0.023    | -0.005    | -0.002    | -0.013      | 0.013       | 0.022         | -0.033        | 0.002      | -0.001     | 0.009             | 0.011             |
| S5            | MSE     | 1.019       | 0.984        | 1.126     | 0.979  | 1.416    | 1.039    | 1.479     | 1.012     | 1.241       | 0.987       | 0.993         | 0.993         | 1.330      | 0.996      | 1.126             | 0.988             |
|               | Pearson | 0.093       | 0.087        | 0.062     | 0.110  | 0.015    | 0.009    | 0.003     | 0.033     | 0.037       | 0.080       | 0.040         | 0.076         | 0.016      | 0.031      | 0.013             | 0.042             |
| S6            | MSE     | 1.094       | 1.062        | 1.263     | 1.056  | 1.431    | 1.108    | 1.541     | 1.064     | 1.309       | 1.072       | 1.053         | 1.065         | 1.372      | 1.030      | 1.138 ±0.012      | 1.037             |
|               | Pearson | 0.002       | -0.024       | -0.014    | -0.024 | 0.013    | -0.000   | -0.026    | -0.004    | -0.004      | -0.005      | -0.015        | 0.011         | 0.011      | 0.051      | 0.006 ±0.012      | -0.014            |
| S7            | MSE     | 1.033       | 0.971        | 1.237     | 0.966  | 1.381    | 0.977    | 1.411     | 0.973     | 1.230       | 0.966       | 0.960         | 0.980         | 1.276      | 0.942      | 1.036             | 0.943             |
|               | Pearson | 0.049       | 0.051        | 0.049     | 0.071  | -0.012   | 0.007    | 0.008     | 0.028     | 0.008       | 0.046       | 0.033         | 0.031         | 0.021      | 0.048      | 0.037             | 0.011             |
| S8            | MSE     | 1.107       | 1.046        | 1.209     | 1.044  | 1.416    | 1.029    | 1.538     | 1.034     | 1.253       | 1.024       | 1.048         | 1.065         | 1.361      | 0.999      | 1.102             | 1.042             |
|               | Pearson | -0.014      | 0.012        | 0.008     | 0.018  | 0.003    | -0.004   | -0.025    | 0.010     | 0.041       | 0.004       | -0.005        | -0.004        | 0.003      | 0.003      | 0.029             | 0.036             |
| S9            | MSE     | 1.107       | 1.054        | 1.308     | 1.070  | 1.426    | 1.107    | 1.555     | 1.062     | 1.317       | 1.100       | 1.034 ± 0.002 | 1.087 ±0.003  | 1.369      | 1.044      | 1.151             | 1.054             |
|               | Pearson | 0.010       | 0.007        | -0.006    | 0.017  | 0.016    | 0.001    | -0.028    | 0.004     | -0.001      | 0.003       | 0.022 ± 0.004 | -0.010 ±0.004 | 0.015      | -0.048     | 0.012             | -0.002            |

## G.3.3 GENERALIZATION DROP AFTER FINE-TUNING

Table 85: Average Model Performance Drop

| Model (Strategy)         | MSE                                           | Pearson                                       |
|--------------------------|-----------------------------------------------|-----------------------------------------------|
| <b>DeepConvnet</b>       | -0.092<br>$\pm 0.027$                         | 0.027<br>$\pm 0.008$                          |
| <b>EEGNet</b>            | -0.024<br>$\pm 0.013$                         | 0.018<br>$\pm 0.007$                          |
| <b>Conformer</b>         | -0.224<br>$\pm 0.064$                         | 0.020<br>$\pm 0.008$                          |
| <b>CTNet</b>             | -0.032<br>$\pm 0.013$                         | 0.025<br>$\pm 0.007$                          |
| <b>BIOT (f)</b>          | -0.122<br>$\pm 0.030$                         | 0.003<br>$\pm 0.006$                          |
| <b>BIOT (l)</b>          | -0.045<br>$\pm 0.016$                         | 0.003<br>$\pm 0.005$                          |
| <b>BENDR (f)</b>         | 0.105<br>$\pm 0.068$                          | -0.002<br>$\pm 0.005$                         |
| <b>BENDR (l)</b>         | -0.029<br>$\pm 0.003$                         | 0.023<br>$\pm 0.007$                          |
| <b>CBraMod (f)</b>       | <b>0.152</b><br><b><math>\pm 0.016</math></b> | <b>0.002</b><br><b><math>\pm 0.006</math></b> |
| <b>CBraMod (l)</b>       | -0.024<br>$\pm 0.014$                         | 0.015<br>$\pm 0.007$                          |
| <b>EEGPT (f)</b>         | -0.012<br>$\pm 0.010$                         | 0.018<br>$\pm 0.008$                          |
| <b>EEGPT (l)</b>         | -0.035<br>$\pm 0.012$                         | 0.034<br>$\pm 0.010$                          |
| <b>LaBraM (f)</b>        | <b>0.289</b><br><b><math>\pm 0.026</math></b> | 0.003<br>$\pm 0.003$                          |
| <b>LaBraM (l)</b>        | -0.005<br>$\pm 0.004$                         | 0.014<br>$\pm 0.009$                          |
| <b>STEEGformer-s (f)</b> | 0.118<br>$\pm 0.013$                          | 0.003<br>$\pm 0.004$                          |
| <b>STEEGformer-s (l)</b> | -0.042<br>$\pm 0.065$                         | 0.014<br>$\pm 0.011$                          |

Table 86: Per-Subject Average Drop on Seen Subjects (Post-Fine-Tuning).

| SubjectMetric |         | DeepConvnet      | EEGNet           | Conformer        | CTNet            | BIOT (f)                 | BIOT (l)                 | BENDR (f)                      | BENDR (l)        | CBraMod (f)                    | CBraMod (l)              | EEGPT (f)        | EEGPT (l)        | LaBraM (f)       | LaBraM (l)       | STEEGformers (f)         | STEEGformers (l)  |
|---------------|---------|------------------|------------------|------------------|------------------|--------------------------|--------------------------|--------------------------------|------------------|--------------------------------|--------------------------|------------------|------------------|------------------|------------------|--------------------------|-------------------|
| S1            | MSE     | -0.108<br>±0.036 | -0.027<br>±0.032 | -0.264<br>±0.045 | -0.037<br>±0.030 | -0.109<br>±0.099         | -0.043<br>±0.039         | <b>0.185</b><br>± <b>0.067</b> | -0.030<br>±0.031 | 0.144<br>±0.049                | -0.034<br>±0.032         | -0.019<br>±0.030 | -0.051<br>±0.036 | 0.306<br>± 0.045 | -0.006<br>±0.033 | 0.125<br>±0.039          | -0.027<br>±0.029  |
|               | Pearson | 0.034<br>±0.036  | 0.019<br>±0.038  | 0.023<br>±0.026  | 0.028<br>±0.041  | -0.001<br>±0.023         | -0.003<br>±0.039         | -0.011<br>± 0.020              | 0.011<br>±0.023  | 0.003<br>±0.027                | 0.012<br>±0.035          | 0.012<br>±0.038  | 0.037<br>±0.030  | -0.000<br>±0.009 | 0.006<br>±0.027  | -0.004<br>± <b>0.028</b> | 0.021<br>±0.051   |
| S10           | MSE     | -0.080<br>±0.033 | -0.010<br>±0.030 | -0.256<br>±0.058 | -0.015<br>±0.030 | -0.061<br>±0.080         | -0.042<br>±0.037         | <b>0.157</b><br>± <b>0.068</b> | -0.031<br>±0.031 | 0.133<br>±0.051                | -0.017<br>±0.031         | -0.004<br>±0.030 | -0.033<br>±0.027 | 0.279<br>± 0.035 | -0.003<br>±0.033 | 0.125<br>±0.040          | -0.003<br>±0.032  |
|               | Pearson | 0.037<br>±0.036  | 0.025<br>±0.048  | 0.026<br>±0.042  | 0.034<br>±0.045  | 0.001<br>±0.021          | 0.002<br>±0.031          | -0.001<br>± 0.025              | 0.029<br>±0.018  | 0.006<br>±0.034                | 0.015<br>±0.036          | 0.015<br>±0.044  | 0.040<br>±0.042  | 0.001<br>±0.016  | 0.017<br>±0.026  | -0.000<br>± <b>0.023</b> | 0.018<br>±0.042   |
| S11           | MSE     | -0.157<br>±0.040 | -0.046<br>±0.030 | -0.079<br>±0.048 | -0.046<br>±0.032 | -0.146<br>±0.060         | -0.009<br>±0.030         | -0.065<br>±0.049               | -0.036<br>±0.030 | <b>0.198</b><br>± <b>0.045</b> | 0.002<br>±0.029          | 0.002<br>±0.029  | -0.007<br>±0.027 | 0.201<br>± 0.031 | -0.018<br>±0.036 | 0.078<br>±0.035          | -0.261<br>±0.057  |
|               | Pearson | 0.027<br>±0.030  | 0.021<br>±0.034  | 0.012<br>±0.041  | 0.026<br>±0.046  | -0.003<br>± <b>0.025</b> | 0.005<br>±0.027          | -0.003<br>± 0.024              | 0.042<br>±0.017  | 0.009<br>±0.024                | 0.015<br>±0.040          | 0.012<br>±0.041  | 0.047<br>±0.037  | 0.004<br>±0.013  | 0.013<br>±0.025  | 0.005<br>±0.021          | 0.021<br>±0.041   |
| S12           | MSE     | -0.059<br>±0.034 | -0.009<br>±0.028 | -0.191<br>±0.040 | -0.020<br>±0.030 | -0.121<br>±0.095         | -0.036<br>±0.032         | <b>0.178</b><br>± <b>0.089</b> | -0.024<br>±0.031 | 0.132<br>±0.060                | -0.033<br>±0.032         | -0.002<br>±0.030 | -0.035<br>±0.030 | 0.323<br>± 0.044 | -0.001<br>±0.030 | 0.129<br>±0.037          | -0.045<br>±0.033  |
|               | Pearson | 0.035<br>±0.036  | 0.022<br>±0.047  | 0.019<br>±0.036  | 0.031<br>±0.039  | -0.007<br>± 0.028        | 0.001<br>±0.026          | -0.001<br>± <b>0.022</b>       | 0.026<br>±0.020  | 0.014<br>±0.023                | 0.027<br>±0.039          | 0.022<br>±0.039  | 0.050<br>±0.040  | 0.006<br>±0.017  | 0.006<br>±0.035  | 0.004<br>±0.029          | 0.023<br>±0.061   |
| S13           | MSE     | -0.084<br>±0.033 | -0.027<br>±0.033 | -0.222<br>±0.040 | -0.023<br>±0.033 | -0.081<br>±0.097         | -0.053<br>±0.040         | 0.139<br>±0.074                | -0.026<br>±0.031 | <b>0.160</b><br>± <b>0.041</b> | -0.014<br>±0.030         | -0.016<br>±0.030 | -0.028<br>±0.031 | 0.292<br>± 0.046 | -0.001<br>±0.032 | 0.135<br>±0.042          | -0.005<br>±0.032  |
|               | Pearson | 0.024<br>±0.032  | 0.018<br>±0.038  | 0.012<br>±0.033  | 0.023<br>±0.039  | 0.005<br>±0.031          | -0.000<br>± <b>0.023</b> | 0.001<br>±0.022                | 0.018<br>±0.016  | 0.001<br>±0.018                | 0.013<br>±0.036          | 0.007<br>±0.043  | 0.020<br>±0.039  | 0.005<br>±0.012  | 0.012<br>±0.030  | 0.005<br>±0.029          | -0.001<br>± 0.035 |
| S14           | MSE     | -0.115<br>±0.032 | -0.016<br>±0.028 | -0.301<br>±0.040 | -0.021<br>±0.028 | -0.166<br>±0.094         | -0.079<br>±0.037         | <b>0.177</b><br>± <b>0.073</b> | -0.032<br>±0.031 | 0.147<br>±0.042                | -0.036<br>±0.029         | -0.008<br>±0.030 | -0.042<br>±0.030 | 0.294<br>± 0.036 | -0.004<br>±0.029 | 0.107<br>±0.043          | -0.009<br>±0.032  |
|               | Pearson | 0.020<br>±0.046  | 0.013<br>±0.052  | 0.011<br>±0.030  | 0.022<br>±0.059  | 0.006<br>±0.028          | 0.008<br>±0.036          | -0.006<br>± 0.019              | 0.026<br>±0.021  | 0.009<br>±0.029                | -0.000<br>± <b>0.044</b> | 0.029<br>±0.050  | 0.039<br>±0.049  | 0.006<br>±0.018  | 0.008<br>±0.036  | 0.008<br>±0.033          | 0.010<br>±0.046   |
| S15           | MSE     | -0.130<br>±0.035 | -0.045<br>±0.034 | -0.306<br>±0.052 | -0.054<br>±0.031 | -0.108<br>±0.068         | -0.038<br>±0.037         | 0.029<br>±0.092                | -0.029<br>±0.030 | <b>0.142</b><br>± <b>0.064</b> | -0.038<br>±0.030         | -0.033<br>±0.031 | -0.041<br>±0.033 | 0.283<br>± 0.041 | -0.005<br>±0.031 | 0.120<br>±0.040          | -0.007<br>±0.032  |
|               | Pearson | 0.024<br>±0.026  | 0.009<br>±0.035  | 0.008<br>±0.044  | 0.013<br>±0.034  | 0.017<br>±0.030          | 0.009<br>±0.038          | 0.003<br>±0.029                | 0.010<br>±0.018  | -0.000<br>±0.039               | 0.005<br>±0.038          | 0.008<br>±0.040  | 0.016<br>±0.035  | -0.005<br>±0.015 | 0.004<br>±0.036  | -0.006<br>± <b>0.021</b> | -0.007<br>± 0.033 |

Continued on next page



| SubjectMetric |         | DeepConvnet      | EEGNet           | Conformer        | CTNet            | BIOT (f)                       | BIOT (f)          | BENDR (f)                      | BENDR (f)        | CBraMod (f)                    | CBraMod (f)      | EEGPT (f)        | EEGPT (f)        | LaBraM (f)               | LaBraM (f)       | STEEGformer-s (f) | STEEGformer-s (f) |
|---------------|---------|------------------|------------------|------------------|------------------|--------------------------------|-------------------|--------------------------------|------------------|--------------------------------|------------------|------------------|------------------|--------------------------|------------------|-------------------|-------------------|
| S16           | MSE     | -0.092<br>±0.035 | -0.027<br>±0.034 | -0.303<br>±0.059 | -0.039<br>±0.032 | -0.140<br>±0.072               | -0.037<br>±0.031  | 0.097<br>±0.075                | -0.028<br>±0.031 | <b>0.142</b><br>± <b>0.055</b> | -0.029<br>±0.032 | -0.009<br>±0.031 | -0.031<br>±0.030 | 0.315<br>± 0.047         | -0.006<br>±0.033 | 0.122<br>±0.034   | -0.002<br>±0.033  |
|               | Pearson | 0.035<br>±0.042  | 0.031<br>±0.041  | 0.038<br>±0.036  | 0.037<br>±0.047  | <b>0.005</b><br>± <b>0.024</b> | 0.016<br>±0.032   | -0.004<br>± 0.023              | 0.028<br>±0.024  | 0.005<br>±0.031                | 0.024<br>±0.033  | 0.034<br>±0.041  | 0.038<br>±0.040  | 0.007<br>±0.015          | 0.021<br>±0.035  | 0.007<br>±0.025   | 0.024<br>±0.036   |
| S17           | MSE     | -0.100<br>±0.035 | -0.028<br>±0.029 | -0.139<br>±0.038 | -0.038<br>±0.030 | -0.094<br>±0.082               | -0.025<br>±0.037  | 0.078<br>±0.070                | -0.028<br>±0.030 | <b>0.147</b><br>± <b>0.056</b> | -0.009<br>±0.026 | -0.018<br>±0.027 | -0.051<br>±0.027 | 0.273<br>± 0.044         | -0.004<br>±0.031 | 0.113<br>±0.040   | -0.004<br>±0.031  |
|               | Pearson | 0.022<br>±0.042  | 0.011<br>±0.042  | 0.015<br>±0.034  | 0.020<br>±0.046  | 0.010<br>±0.019                | -0.007<br>± 0.041 | -0.006<br>± <b>0.025</b>       | 0.025<br>±0.024  | -0.004<br>±0.023               | 0.011<br>±0.039  | 0.015<br>±0.057  | 0.032<br>±0.045  | 0.004<br>±0.014          | 0.019<br>±0.026  | -0.000<br>±0.026  | 0.017<br>±0.054   |
| S18           | MSE     | -0.114<br>±0.036 | -0.031<br>±0.031 | -0.224<br>±0.049 | -0.036<br>±0.031 | -0.167<br>±0.084               | -0.051<br>±0.036  | 0.030<br>±0.091                | -0.027<br>±0.032 | <b>0.133</b><br>± <b>0.040</b> | -0.021<br>±0.033 | -0.007<br>±0.031 | -0.038<br>±0.033 | 0.284<br>± 0.051         | -0.006<br>±0.033 | 0.118<br>±0.043   | -0.148<br>±0.075  |
|               | Pearson | 0.041<br>±0.031  | 0.030<br>±0.043  | 0.030<br>±0.044  | 0.035<br>±0.042  | 0.010<br>±0.027                | 0.005<br>±0.027   | 0.004<br>±0.024                | 0.023<br>±0.019  | <b>0.003</b><br>± <b>0.028</b> | 0.024<br>±0.035  | 0.014<br>±0.037  | 0.040<br>±0.036  | 0.003<br>±0.018          | 0.019<br>±0.029  | 0.003<br>± 0.031  | 0.027<br>±0.043   |
| S2            | MSE     | -0.103<br>±0.032 | -0.010<br>±0.028 | -0.187<br>±0.026 | -0.026<br>±0.028 | -0.102<br>±0.079               | -0.058<br>±0.035  | 0.017<br>±0.068                | -0.031<br>±0.029 | <b>0.162</b><br>± <b>0.058</b> | -0.027<br>±0.026 | -0.008<br>±0.026 | -0.031<br>±0.028 | 0.266<br>± 0.037         | -0.006<br>±0.029 | 0.104<br>±0.040   | -0.064<br>±0.027  |
|               | Pearson | 0.014<br>±0.036  | 0.005<br>±0.045  | 0.021<br>±0.029  | 0.012<br>±0.045  | 0.000<br>±0.024                | -0.000<br>±0.024  | -0.000<br>±0.023               | 0.023<br>±0.017  | -0.003<br>± 0.032              | 0.021<br>±0.036  | 0.019<br>±0.041  | 0.025<br>±0.044  | -0.001<br>± <b>0.018</b> | 0.011<br>±0.031  | 0.001<br>±0.033   | 0.009<br>±0.042   |
| S3            | MSE     | -0.062<br>±0.030 | -0.015<br>±0.027 | -0.168<br>±0.037 | -0.036<br>±0.030 | -0.163<br>±0.078               | -0.055<br>±0.035  | 0.055<br>±0.087                | -0.028<br>±0.031 | <b>0.140</b><br>± <b>0.063</b> | -0.015<br>±0.032 | -0.011<br>±0.030 | -0.037<br>±0.029 | 0.278<br>± 0.051         | -0.001<br>±0.032 | 0.113<br>±0.035   | -0.072<br>±0.049  |
|               | Pearson | 0.039<br>±0.045  | 0.024<br>±0.048  | 0.026<br>±0.037  | 0.032<br>±0.052  | 0.002<br>±0.024                | -0.003<br>± 0.030 | -0.001<br>± <b>0.026</b>       | 0.026<br>±0.026  | 0.001<br>±0.025                | 0.016<br>±0.034  | 0.025<br>±0.036  | 0.042<br>±0.034  | 0.002<br>±0.013          | 0.010<br>±0.031  | 0.003<br>±0.025   | 0.014<br>±0.047   |
| S4            | MSE     | -0.073<br>±0.029 | -0.015<br>±0.030 | -0.299<br>±0.055 | -0.031<br>±0.030 | -0.160<br>±0.093               | -0.031<br>±0.035  | <b>0.188</b><br>± <b>0.057</b> | -0.030<br>±0.031 | 0.157<br>±0.049                | -0.021<br>±0.030 | -0.013<br>±0.029 | -0.018<br>±0.028 | 0.297<br>± 0.039         | -0.001<br>±0.030 | 0.128<br>±0.041   | -0.005<br>±0.032  |
|               | Pearson | 0.024<br>±0.044  | 0.018<br>±0.041  | 0.009<br>±0.039  | 0.019<br>±0.050  | 0.004<br>±0.022                | 0.008<br>±0.028   | <b>0.001</b><br>± <b>0.021</b> | 0.025<br>±0.020  | -0.000<br>± 0.034              | 0.008<br>±0.037  | 0.016<br>±0.040  | 0.018<br>±0.043  | 0.004<br>±0.013          | 0.004<br>±0.036  | 0.006<br>±0.028   | 0.015<br>±0.048   |
| S5            | MSE     | -0.062<br>±0.031 | -0.006<br>±0.028 | -0.177<br>±0.030 | -0.013<br>±0.028 | -0.134<br>±0.072               | -0.066<br>±0.050  | 0.110<br>±0.082                | -0.027<br>±0.030 | <b>0.166</b><br>± <b>0.046</b> | -0.009<br>±0.030 | -0.006<br>±0.030 | -0.021<br>±0.030 | 0.301<br>± 0.040         | -0.005<br>±0.035 | 0.112<br>±0.035   | -0.001<br>±0.033  |
|               | Pearson | 0.028<br>±0.040  | 0.016<br>±0.038  | 0.028<br>±0.041  | 0.028<br>±0.044  | <b>0.001</b><br>± <b>0.022</b> | 0.003<br>±0.039   | 0.004<br>±0.022                | 0.029<br>±0.017  | -0.007<br>± 0.020              | 0.020<br>±0.033  | 0.023<br>±0.046  | 0.030<br>±0.039  | 0.007<br>±0.013          | 0.018<br>±0.034  | 0.002<br>±0.023   | 0.009<br>±0.029   |
| S6            | MSE     | -0.053<br>±0.034 | -0.014<br>±0.030 | -0.168<br>±0.045 | -0.012<br>±0.028 | -0.116<br>±0.083               | -0.058<br>±0.038  | 0.147<br>±0.089                | -0.024<br>±0.032 | <b>0.174</b><br>± <b>0.056</b> | -0.027<br>±0.030 | -0.011<br>±0.030 | -0.032<br>±0.028 | 0.305<br>± 0.042         | -0.002<br>±0.029 | 0.130<br>±0.034   | -0.002<br>±0.030  |

Continued on next page

| SubjectMetric |         | DeepConvnet      | EEGNet           | Conformer        | CTNet            | BIOT (f)         | BIOT (l)         | BENDR (f)         | BENDR (l)        | CBraMod (f)       | CBraMod (l)      | EEGPT (f)        | EEGPT (l)        | LaBraM (f)        | LaBraM (l)       | STEEGformer-s (f) | STEEGformer-s (l) |
|---------------|---------|------------------|------------------|------------------|------------------|------------------|------------------|-------------------|------------------|-------------------|------------------|------------------|------------------|-------------------|------------------|-------------------|-------------------|
| S7            | Pearson | 0.030<br>±0.037  | 0.020<br>±0.035  | 0.012<br>±0.030  | 0.026<br>±0.040  | 0.007<br>±0.025  | 0.001<br>±0.038  | -0.008<br>± 0.029 | 0.026<br>±0.019  | -0.004<br>± 0.026 | 0.020<br>±0.031  | 0.024<br>±0.039  | 0.045<br>±0.039  | 0.004<br>±0.014   | 0.017<br>±0.036  | 0.010<br>±0.026   | 0.012<br>±0.050   |
|               | MSE     | -0.109<br>±0.036 | -0.047<br>±0.028 | -0.293<br>±0.042 | -0.052<br>±0.028 | -0.128<br>±0.085 | -0.042<br>±0.030 | 0.121<br>±0.094   | -0.035<br>±0.025 | 0.155<br>± 0.047  | -0.029<br>±0.026 | -0.022<br>±0.025 | -0.050<br>±0.029 | 0.290<br>± 0.031  | -0.009<br>±0.025 | 0.122<br>±0.031   | -0.006<br>±0.027  |
|               | Pearson | 0.009<br>±0.035  | 0.011<br>±0.030  | 0.016<br>±0.035  | 0.017<br>±0.027  | 0.008<br>±0.033  | 0.004<br>±0.037  | -0.013<br>± 0.025 | 0.011<br>±0.021  | -0.008<br>± 0.030 | 0.010<br>±0.032  | 0.004<br>±0.030  | 0.024<br>±0.035  | -0.002<br>±0.015  | 0.012<br>±0.029  | -0.000<br>±0.027  | 0.010<br>±0.047   |
| S8            | MSE     | -0.093<br>±0.040 | -0.038<br>±0.032 | -0.199<br>±0.047 | -0.045<br>±0.034 | -0.101<br>±0.077 | -0.036<br>±0.038 | 0.100<br>±0.081   | -0.029<br>±0.030 | 0.157<br>± 0.061  | -0.020<br>±0.032 | -0.035<br>±0.029 | -0.048<br>±0.031 | 0.301<br>± 0.038  | -0.008<br>±0.033 | 0.112<br>±0.043   | -0.076<br>±0.043  |
|               | Pearson | 0.029<br>±0.040  | 0.018<br>±0.041  | 0.017<br>±0.033  | 0.027<br>±0.034  | -0.002<br>±0.021 | 0.002<br>±0.035  | -0.003<br>± 0.023 | 0.019<br>±0.019  | -0.002<br>± 0.030 | 0.013<br>±0.026  | 0.022<br>±0.040  | 0.031<br>±0.034  | 0.004<br>±0.012   | 0.042<br>±0.024  | 0.004<br>±0.034   | 0.037<br>±0.037   |
|               | MSE     | -0.065<br>±0.027 | -0.013<br>±0.030 | -0.263<br>±0.042 | -0.033<br>±0.030 | -0.100<br>±0.071 | -0.053<br>±0.031 | 0.152<br>± 0.064  | -0.026<br>±0.029 | 0.147<br>±0.049   | -0.062<br>±0.035 | -0.002<br>±0.028 | -0.042<br>±0.033 | 0.314<br>± 0.041  | -0.001<br>±0.030 | 0.123<br>±0.029   | -0.012<br>±0.032  |
| S9            | Pearson | 0.021<br>±0.037  | 0.016<br>±0.048  | 0.028<br>±0.029  | 0.025<br>±0.046  | 0.000<br>±0.015  | -0.002<br>±0.027 | 0.003<br>±0.022   | 0.026<br>±0.024  | 0.006<br>±0.018   | 0.012<br>±0.043  | 0.021<br>±0.042  | 0.040<br>±0.042  | -0.003<br>± 0.018 | 0.008<br>±0.027  | 0.001<br>±0.021   | -0.004<br>± 0.039 |

## H SEED-VIG EEG REGRESSION RESULTS

### H.1 POPULATION-LEVEL RESULTS

Table 87: Average Performance Metrics Across All Subjects of Population-Trained Models

| Model (Training strategy) | MSE                         | Pearson                     |
|---------------------------|-----------------------------|-----------------------------|
| <b>DeepConvnet</b>        | 0.022<br>$\pm 0.015$        | 0.498<br>$\pm 0.330$        |
| <b>EEGNet</b>             | 0.078<br>$\pm 0.056$        | 0.478<br>$\pm 0.317$        |
| <b>Conformer</b>          | 0.017<br>$\pm 0.013$        | 0.510<br>$\pm 0.348$        |
| <b>CTNet</b>              | 0.034<br>$\pm 0.027$        | 0.465<br>$\pm 0.344$        |
| <b>BIOT (f)</b>           | 0.018<br>$\pm 0.013$        | 0.503<br>$\pm 0.341$        |
| <b>BIOT (l)</b>           | 0.025<br>$\pm 0.013$        | 0.457<br>$\pm 0.317$        |
| <b>BENDR (f)</b>          | 0.027<br>$\pm 0.017$        | 0.423<br>$\pm 0.336$        |
| <b>BENDR (l)</b>          | 0.095<br>$\pm 0.070$        | 0.089<br>$\pm 0.140$        |
| <b>CBraMod (f)</b>        | <b>0.015</b><br>$\pm 0.014$ | <b>0.551</b><br>$\pm 0.340$ |
| <b>CBraMod (l)</b>        | 2.446<br>$\pm 2.242$        | 0.154<br>$\pm 0.313$        |
| <b>EEGPT (f)</b>          | 0.019<br>$\pm 0.015$        | 0.500<br>$\pm 0.346$        |
| <b>EEGPT (l)</b>          | 0.025<br>$\pm 0.016$        | 0.462<br>$\pm 0.325$        |
| <b>LaBraM (f)</b>         | <b>0.014</b><br>$\pm 0.014$ | <b>0.561</b><br>$\pm 0.328$ |
| <b>LaBraM (l)</b>         | 0.049<br>$\pm 0.043$        | 0.439<br>$\pm 0.296$        |
| <b>STEEGformer-s (f)</b>  | 0.016<br>$\pm 0.018$        | 0.539<br>$\pm 0.350$        |
| <b>STEEGformer-s (l)</b>  | 0.055<br>$\pm 0.049$        | 0.388<br>$\pm 0.360$        |
| <b>STEEGformer-b (f)</b>  | 0.017<br>$\pm 0.021$        | 0.549<br>$\pm 0.340$        |
| <b>STEEGformer-b (l)</b>  | 0.040<br>$\pm 0.034$        | 0.407<br>$\pm 0.339$        |
| <b>STEEGformer-l (f)</b>  | 0.024<br>$\pm 0.021$        | 0.514<br>$\pm 0.347$        |
| <b>STEEGformer-l (l)</b>  | 0.034<br>$\pm 0.028$        | 0.472<br>$\pm 0.347$        |

Table 88: Per-Subject Performance Metrics of Population-Trained Models

| Subject    | Metric  | DeepConvnet | EEGNet | Conformer | CTNet | BIOT (f) | BIOT (l) | BENDR (f) | BENDR (l) | CBraMod (f) | CBraMod (l) | EEGPT (f) | EEGPT (l) | LaBraM (f) | LaBraM (l) | STEEGformer-s (f) | STEEGformer-s (l) | STEEGformer-b (f) | STEEGformer-b (l) | STEEGformer-l (f) | STEEGformer-l (l) |
|------------|---------|-------------|--------|-----------|-------|----------|----------|-----------|-----------|-------------|-------------|-----------|-----------|------------|------------|-------------------|-------------------|-------------------|-------------------|-------------------|-------------------|
| subject_1  | MSE     | 0.028       | 0.211  | 0.002     | 0.099 | 0.003    | 0.020    | 0.009     | 0.246     | 0.002       | 5.789       | 0.005     | 0.005     | 0.003      | 0.045      | 0.005             | 0.053             | 0.004             | 0.022             | 0.011             | 0.005             |
|            | Pearson | 0.938       | 0.946  | 0.984     | 0.856 | 0.976    | 0.837    | 0.923     | 0.063     | 0.982       | -0.640      | 0.955     | 0.947     | 0.976      | 0.913      | 0.980             | 0.933             | 0.977             | 0.941             | 0.976             | 0.955             |
| subject_10 | MSE     | 0.027       | 0.067  | 0.021     | 0.025 | 0.024    | 0.033    | 0.029     | 0.043     | 0.018       | 1.735       | 0.025     | 0.024     | 0.019      | 0.026      | 0.020             | 0.028             | 0.018             | 0.027             | 0.026             | 0.027             |
|            | Pearson | 0.377       | 0.402  | 0.471     | 0.389 | 0.445    | 0.461    | 0.281     | -0.000    | 0.536       | 0.437       | 0.492     | 0.426     | 0.512      | 0.164      | 0.443             | 0.127             | 0.493             | 0.197             | 0.373             | 0.247             |
| subject_11 | MSE     | 0.018       | 0.074  | 0.014     | 0.013 | 0.016    | 0.015    | 0.018     | 0.033     | 0.008       | 0.439       | 0.009     | 0.016     | 0.008      | 0.015      | 0.006             | 0.022             | 0.011             | 0.016             | 0.010             | 0.012             |
|            | Pearson | 0.508       | 0.387  | 0.483     | 0.522 | 0.459    | 0.532    | 0.346     | 0.157     | 0.693       | 0.270       | 0.645     | 0.460     | 0.704      | 0.419      | 0.791             | 0.326             | 0.600             | 0.347             | 0.680             | 0.490             |
| subject_12 | MSE     | 0.029       | 0.078  | 0.023     | 0.044 | 0.030    | 0.031    | 0.032     | 0.125     | 0.018       | 9.043       | 0.022     | 0.037     | 0.019      | 0.064      | 0.016             | 0.079             | 0.020             | 0.054             | 0.027             | 0.043             |
|            | Pearson | 0.910       | 0.859  | 0.912     | 0.825 | 0.892    | 0.886    | 0.877     | 0.288     | 0.933       | 0.743       | 0.919     | 0.855     | 0.936      | 0.814      | 0.937             | 0.815             | 0.925             | 0.861             | 0.909             | 0.898             |
| subject_13 | MSE     | 0.020       | 0.192  | 0.003     | 0.049 | 0.006    | 0.026    | 0.024     | 0.229     | 0.011       | 2.608       | 0.015     | 0.012     | 0.004      | 0.057      | 0.010             | 0.092             | 0.006             | 0.036             | 0.023             | 0.041             |
|            | Pearson | 0.880       | 0.829  | 0.973     | 0.780 | 0.942    | 0.780    | 0.759     | 0.227     | 0.940       | -0.334      | 0.882     | 0.907     | 0.964      | 0.830      | 0.973             | 0.804             | 0.980             | 0.856             | 0.888             | 0.908             |
| subject_14 | MSE     | 0.021       | 0.052  | 0.028     | 0.023 | 0.024    | 0.020    | 0.022     | 0.040     | 0.021       | 0.843       | 0.020     | 0.027     | 0.026      | 0.015      | 0.029             | 0.023             | 0.033             | 0.018             | 0.017             | 0.016             |
|            | Pearson | 0.670       | 0.425  | 0.397     | 0.555 | 0.556    | 0.675    | 0.642     | 0.323     | 0.615       | 0.437       | 0.641     | 0.514     | 0.498      | 0.739      | 0.394             | 0.670             | 0.289             | 0.692             | 0.714             | 0.728             |
| subject_15 | MSE     | 0.005       | 0.014  | 0.014     | 0.018 | 0.013    | 0.024    | 0.013     | 0.039     | 0.006       | 0.817       | 0.010     | 0.026     | 0.006      | 0.019      | 0.007             | 0.012             | 0.009             | 0.022             | 0.014             | 0.029             |
|            | Pearson | 0.168       | 0.233  | 0.114     | 0.024 | 0.158    | 0.089    | -0.164    | 0.178     | 0.178       | 0.267       | 0.073     | 0.107     | 0.142      | 0.000      | 0.136             | -0.070            | 0.262             | -0.058            | 0.085             | 0.133             |
| subject_16 | MSE     | 0.040       | 0.185  | 0.005     | 0.047 | 0.007    | 0.048    | 0.035     | 0.229     | 0.005       | 3.585       | 0.032     | 0.036     | 0.005      | 0.126      | 0.007             | 0.154             | 0.008             | 0.108             | 0.041             | 0.048             |
|            | Pearson | 0.951       | 0.930  | 0.987     | 0.888 | 0.978    | 0.817    | 0.821     | -0.053    | 0.987       | 0.437       | 0.905     | 0.865     | 0.983      | 0.575      | 0.989             | 0.641             | 0.991             | 0.799             | 0.951             | 0.889             |
| subject_17 | MSE     | 0.008       | 0.041  | 0.002     | 0.004 | 0.004    | 0.014    | 0.008     | 0.032     | 0.002       | 1.361       | 0.004     | 0.004     | 0.003      | 0.005      | 0.003             | 0.004             | 0.003             | 0.006             | 0.011             | 0.005             |
|            | Pearson | 0.115       | 0.144  | 0.289     | 0.249 | 0.043    | 0.275    | 0.133     | -0.057    | 0.270       | 0.192       | 0.327     | 0.406     | 0.312      | 0.208      | 0.141             | 0.393             | 0.061             | 0.276             | 0.177             | 0.379             |
| subject_18 | MSE     | 0.005       | 0.049  | 0.009     | 0.018 | 0.009    | 0.008    | 0.016     | 0.076     | 0.005       | 4.278       | 0.009     | 0.018     | 0.005      | 0.021      | 0.006             | 0.018             | 0.007             | 0.009             | 0.010             | 0.011             |
|            | Pearson | 0.130       | 0.102  | 0.290     | 0.011 | 0.095    | 0.006    | 0.226     | -0.074    | 0.050       | 0.221       | 0.083     | 0.303     | 0.215      | 0.048      | 0.077             | -0.167            | 0.235             | -0.066            | -0.155            | -0.153            |
| subject_19 | MSE     | 0.009       | 0.052  | 0.007     | 0.009 | 0.009    | 0.015    | 0.015     | 0.034     | 0.006       | 0.642       | 0.010     | 0.013     | 0.005      | 0.022      | 0.009             | 0.012             | 0.006             | 0.013             | 0.012             | 0.015             |

Continued on next page

|            |         | 11142       | 11143  | 11144     | 11145  | 11146    | 11147    | 11148     | 11149     | 11150       | 11151       | 11152     | 11153     | 11154      | 11155      | 11156             | 11157             | 11158             | 11159             | 11160             | 11161             | 11162 | 11163 | 11164 | 11165 | 11166 | 11167 | 11168 | 11169 | 11170 | 11171 | 11172 | 11173 | 11174 |
|------------|---------|-------------|--------|-----------|--------|----------|----------|-----------|-----------|-------------|-------------|-----------|-----------|------------|------------|-------------------|-------------------|-------------------|-------------------|-------------------|-------------------|-------|-------|-------|-------|-------|-------|-------|-------|-------|-------|-------|-------|-------|
| Subject    | Metric  | DeepConvnet | EEGNet | Conformer | CTNet  | BIOT (f) | BIOT (l) | BENDR (f) | BENDR (l) | CBraMod (f) | CBraMod (l) | EEGPT (f) | EEGPT (l) | LaBraM (f) | LaBraM (l) | STEEGformer-s (f) | STEEGformer-s (l) | STEEGformer-b (f) | STEEGformer-b (l) | STEEGformer-s (f) | STEEGformer-s (l) |       |       |       |       |       |       |       |       |       |       |       |       |       |
| subject_2  | Pearson | 0.479       | 0.466  | 0.570     | 0.440  | 0.530    | 0.334    | 0.434     | 0.122     | 0.622       | 0.165       | 0.395     | 0.272     | 0.661      | 0.402      | 0.367             | 0.405             | 0.621             | 0.412             | 0.478             | 0.401             |       |       |       |       |       |       |       |       |       |       |       |       |       |
|            | MSE     | 0.005       | 0.052  | 0.013     | 0.025  | 0.015    | 0.020    | 0.015     | 0.081     | 0.006       | 1.592       | 0.008     | 0.011     | 0.005      | 0.018      | 0.011             | 0.008             | 0.011             | 0.016             | 0.019             | 0.027             |       |       |       |       |       |       |       |       |       |       |       |       |       |
|            | Pearson | -0.035      | -0.101 | -0.154    | -0.351 | -0.117   | -0.176   | 0.259     | -0.027    | 0.005       | 0.223       | -0.208    | -0.160    | -0.008     | 0.226      | 0.059             | 0.096             | -0.133            | -0.095            | 0.075             | -0.060            |       |       |       |       |       |       |       |       |       |       |       |       |       |
| subject_20 | MSE     | 0.023       | 0.069  | 0.035     | 0.051  | 0.025    | 0.031    | 0.045     | 0.155     | 0.025       | 3.119       | 0.028     | 0.054     | 0.017      | 0.152      | 0.021             | 0.177             | 0.023             | 0.081             | 0.018             | 0.088             |       |       |       |       |       |       |       |       |       |       |       |       |       |
|            | Pearson | -0.097      | 0.045  | -0.011    | 0.027  | -0.034   | 0.034    | 0.129     | 0.248     | 0.034       | 0.147       | 0.187     | 0.172     | 0.114      | 0.198      | -0.001            | 0.069             | -0.034            | 0.105             | 0.061             | 0.074             |       |       |       |       |       |       |       |       |       |       |       |       |       |
| subject_21 | MSE     | 0.051       | 0.028  | 0.033     | 0.106  | 0.047    | 0.046    | 0.073     | 0.154     | 0.042       | 0.836       | 0.030     | 0.061     | 0.060      | 0.135      | 0.091             | 0.127             | 0.107             | 0.102             | 0.109             | 0.099             |       |       |       |       |       |       |       |       |       |       |       |       |       |
|            | Pearson | 0.556       | 0.510  | 0.491     | 0.616  | 0.448    | 0.505    | 0.553     | 0.176     | 0.587       | 0.067       | 0.668     | 0.588     | 0.386      | 0.688      | 0.358             | 0.672             | 0.371             | 0.647             | 0.596             | 0.665             |       |       |       |       |       |       |       |       |       |       |       |       |       |
| subject_3  | MSE     | 0.010       | 0.116  | 0.004     | 0.011  | 0.008    | 0.014    | 0.015     | 0.023     | 0.005       | 1.588       | 0.007     | 0.017     | 0.004      | 0.021      | 0.003             | 0.037             | 0.005             | 0.030             | 0.014             | 0.009             |       |       |       |       |       |       |       |       |       |       |       |       |       |
|            | Pearson | 0.529       | 0.647  | 0.735     | 0.746  | 0.548    | 0.310    | 0.295     | 0.153     | 0.642       | -0.102      | 0.407     | 0.257     | 0.654      | 0.224      | 0.658             | 0.359             | 0.646             | 0.189             | 0.438             | 0.327             |       |       |       |       |       |       |       |       |       |       |       |       |       |
| subject_4  | MSE     | 0.020       | 0.028  | 0.041     | 0.029  | 0.030    | 0.025    | 0.040     | 0.088     | 0.040       | 2.756       | 0.027     | 0.028     | 0.030      | 0.073      | 0.028             | 0.072             | 0.022             | 0.058             | 0.036             | 0.066             |       |       |       |       |       |       |       |       |       |       |       |       |       |
|            | Pearson | 0.107       | 0.240  | 0.239     | 0.445  | 0.188    | 0.289    | 0.016     | 0.122     | 0.052       | -0.329      | 0.078     | 0.147     | 0.124      | 0.322      | 0.079             | 0.257             | 0.404             | 0.239             | 0.405             | 0.462             |       |       |       |       |       |       |       |       |       |       |       |       |       |
| subject_5  | MSE     | 0.066       | 0.154  | 0.046     | 0.069  | 0.055    | 0.061    | 0.066     | 0.155     | 0.052       | 7.041       | 0.073     | 0.064     | 0.034      | 0.109      | 0.033             | 0.123             | 0.031             | 0.128             | 0.045             | 0.086             |       |       |       |       |       |       |       |       |       |       |       |       |       |
|            | Pearson | 0.822       | 0.805  | 0.854     | 0.794  | 0.815    | 0.802    | 0.787     | 0.251     | 0.835       | 0.657       | 0.820     | 0.840     | 0.894      | 0.797      | 0.897             | 0.738             | 0.904             | 0.611             | 0.919             | 0.813             |       |       |       |       |       |       |       |       |       |       |       |       |       |
| subject_6  | MSE     | 0.026       | 0.050  | 0.021     | 0.016  | 0.016    | 0.028    | 0.024     | 0.049     | 0.014       | 0.712       | 0.015     | 0.024     | 0.013      | 0.021      | 0.008             | 0.026             | 0.011             | 0.026             | 0.021             | 0.023             |       |       |       |       |       |       |       |       |       |       |       |       |       |
|            | Pearson | 0.425       | 0.725  | 0.447     | 0.539  | 0.576    | 0.478    | 0.302     | -0.045    | 0.661       | 0.187       | 0.606     | 0.229     | 0.699      | 0.351      | 0.812             | 0.089             | 0.718             | 0.276             | 0.444             | 0.346             |       |       |       |       |       |       |       |       |       |       |       |       |       |
| subject_7  | MSE     | 0.016       | 0.048  | 0.005     | 0.008  | 0.005    | 0.009    | 0.014     | 0.021     | 0.003       | 0.578       | 0.006     | 0.008     | 0.003      | 0.013      | 0.004             | 0.027             | 0.003             | 0.021             | 0.005             | 0.006             |       |       |       |       |       |       |       |       |       |       |       |       |       |
|            | Pearson | 0.314       | 0.180  | 0.343     | 0.047  | 0.487    | 0.231    | 0.074     | -0.130    | 0.589       | 0.243       | 0.329     | 0.306     | 0.604      | -0.001     | 0.534             | -0.429            | 0.632             | -0.019            | 0.496             | 0.228             |       |       |       |       |       |       |       |       |       |       |       |       |       |
| subject_8  | MSE     | 0.016       | 0.043  | 0.020     | 0.032  | 0.016    | 0.030    | 0.037     | 0.120     | 0.018       | 0.894       | 0.024     | 0.027     | 0.013      | 0.061      | 0.012             | 0.050             | 0.017             | 0.044             | 0.029             | 0.043             |       |       |       |       |       |       |       |       |       |       |       |       |       |
|            | Pearson | 0.914       | 0.833  | 0.923     | 0.868  | 0.935    | 0.892    | 0.893     | 0.119     | 0.925       | -0.155      | 0.919     | 0.901     | 0.932      | 0.887      | 0.945             | 0.907             | 0.930             | 0.898             | 0.937             | 0.919             |       |       |       |       |       |       |       |       |       |       |       |       |       |
| subject_9  | MSE     | 0.010       | 0.030  | 0.011     | 0.009  | 0.010    | 0.011    | 0.014     | 0.030     | 0.006       | 0.903       | 0.011     | 0.014     | 0.008      | 0.016      | 0.006             | 0.005             | 0.005             | 0.007             | 0.007             | 0.009             |       |       |       |       |       |       |       |       |       |       |       |       |       |
|            | Pearson | 0.427       | 0.133  | -0.008    | 0.194  | 0.277    | 0.163    | -0.096    | -0.195    | 0.101       | 0.104       | 0.011     | 0.005     | 0.139      | 0.236      | 0.388             | 0.347             | 0.322             | 0.159             | 0.024             | -0.037            |       |       |       |       |       |       |       |       |       |       |       |       |       |

## H.2 PER-SUBJECT RESULTS

## H.2.1 WITHIN-SUBJECT EVALUATION

Table 89: Average "Self" Performance Across All Subjects

| Model (Training strategy) | MSE                         | Pearson                     |
|---------------------------|-----------------------------|-----------------------------|
| <b>DeepConvnet</b>        | 0.152<br>$\pm 0.153$        | 0.346<br>$\pm 0.411$        |
| <b>EEGNet</b>             | 0.088<br>$\pm 0.063$        | 0.434<br>$\pm 0.350$        |
| <b>Conformer</b>          | 0.036<br>$\pm 0.039$        | 0.389<br>$\pm 0.386$        |
| <b>CTNet</b>              | 0.030<br>$\pm 0.025$        | 0.375<br>$\pm 0.356$        |
| <b>BIOT (f)</b>           | <b>0.016</b><br>$\pm 0.011$ | 0.510<br>$\pm 0.324$        |
| <b>BIOT (l)</b>           | 0.025<br>$\pm 0.013$        | 0.389<br>$\pm 0.337$        |
| <b>BENDR (f)</b>          | 0.057<br>$\pm 0.039$        | 0.178<br>$\pm 0.204$        |
| <b>BENDR (l)</b>          | 0.095<br>$\pm 0.068$        | 0.012<br>$\pm 0.071$        |
| <b>CBraMod (f)</b>        | 0.019<br>$\pm 0.014$        | 0.498<br>$\pm 0.332$        |
| <b>CBraMod (l)</b>        | 0.161<br>$\pm 0.242$        | 0.373<br>$\pm 0.305$        |
| <b>EEGPT (f)</b>          | 0.027<br>$\pm 0.023$        | 0.372<br>$\pm 0.292$        |
| <b>EEGPT (l)</b>          | 0.029<br>$\pm 0.021$        | 0.367<br>$\pm 0.309$        |
| <b>LaBraM (f)</b>         | <b>0.015</b><br>$\pm 0.016$ | 0.534<br>$\pm 0.362$        |
| <b>LaBraM (l)</b>         | 0.031<br>$\pm 0.029$        | 0.399<br>$\pm 0.363$        |
| <b>STEEGformer-s (f)</b>  | 0.018<br>$\pm 0.023$        | 0.503<br>$\pm 0.326$        |
| <b>STEEGformer-s (l)</b>  | 0.029<br>$\pm 0.028$        | 0.391<br>$\pm 0.362$        |
| <b>STEEGformer-b (f)</b>  | 0.016<br>$\pm 0.018$        | <b>0.535</b><br>$\pm 0.321$ |
| <b>STEEGformer-b (l)</b>  | 0.022<br>$\pm 0.020$        | 0.425<br>$\pm 0.383$        |
| <b>STEEGformer-l (f)</b>  | 0.018<br>$\pm 0.026$        | <b>0.547</b><br>$\pm 0.341$ |
| <b>STEEGformer-l (l)</b>  | 0.022<br>$\pm 0.021$        | 0.460<br>$\pm 0.392$        |

Table 90: Per-Subject "Self" Performance (trained+tested on same subject)

| Subject                | Metric  | DeepConvnet | EEGNet | Conformer | CTNet  | BIOT (f) | BIOT (l) | BENDR (f) | BENDR (l) | CBraMod (f) | CBraMod (l) | EEGPT (f) | EEGPT (l) | LaBraM (f) | LaBraM (l) | STEEGformer-s (f) | STEEGformer-s (l) | STEEGformer-b (f) | STEEGformer-b (l) | STEEGformer-l (f) | STEEGformer-l (l) |
|------------------------|---------|-------------|--------|-----------|--------|----------|----------|-----------|-----------|-------------|-------------|-----------|-----------|------------|------------|-------------------|-------------------|-------------------|-------------------|-------------------|-------------------|
| subject_1              | MSE     | 0.104       | 0.146  | 0.016     | 0.045  | 0.003    | 0.021    | 0.053     | 0.155     | 0.018       | 0.043       | 0.009     | 0.009     | 0.003      | 0.007      | 0.003             | 0.007             | 0.002             | 0.007             | 0.002             | 0.002             |
|                        | Pearson | 0.920       | 0.940  | 0.978     | 0.887  | 0.959    | 0.822    | 0.552     | -0.030    | 0.978       | 0.847       | 0.886     | 0.899     | 0.963      | 0.941      | 0.973             | 0.943             | 0.980             | 0.973             | 0.984             | 0.977             |
| subject_10             | MSE     | 0.191       | 0.074  | 0.033     | 0.025  | 0.020    | 0.028    | 0.034     | 0.031     | 0.024       | 0.106       | 0.023     | 0.026     | 0.019      | 0.021      | 0.022             | 0.030             | 0.021             | 0.023             | 0.019             | 0.021             |
|                        | Pearson | 0.048       | 0.381  | 0.118     | 0.152  | 0.532    | 0.280    | 0.095     | 0.186     | 0.347       | 0.200       | 0.306     | 0.301     | 0.475      | 0.390      | 0.423             | 0.096             | 0.443             | 0.343             | 0.533             | 0.397             |
| subject_11             | MSE     | 0.093       | 0.052  | 0.021     | 0.012  | 0.009    | 0.015    | 0.024     | 0.037     | 0.009       | 0.047       | 0.016     | 0.013     | 0.007      | 0.010      | 0.008             | 0.012             | 0.010             | 0.011             | 0.010             | 0.009             |
|                        | Pearson | 0.547       | 0.570  | 0.561     | 0.560  | 0.685    | 0.597    | 0.022     | 0.036     | 0.681       | 0.583       | 0.331     | 0.484     | 0.763      | 0.608      | 0.704             | 0.496             | 0.636             | 0.588             | 0.691             | 0.703             |
| subject_12             | MSE     | 0.332       | 0.150  | 0.025     | 0.050  | 0.027    | 0.042    | 0.105     | 0.228     | 0.035       | 0.281       | 0.056     | 0.067     | 0.024      | 0.074      | 0.024             | 0.050             | 0.021             | 0.038             | 0.021             | 0.028             |
|                        | Pearson | 0.863       | 0.828  | 0.910     | 0.800  | 0.908    | 0.857    | 0.543     | 0.027     | 0.913       | 0.848       | 0.814     | 0.765     | 0.917      | 0.844      | 0.911             | 0.854             | 0.925             | 0.887             | 0.921             | 0.904             |
| subject_13             | MSE     | 0.222       | 0.286  | 0.081     | 0.015  | 0.029    | 0.037    | 0.089     | 0.111     | 0.012       | 0.220       | 0.041     | 0.027     | 0.003      | 0.034      | 0.003             | 0.052             | 0.003             | 0.012             | 0.008             | 0.016             |
|                        | Pearson | 0.782       | 0.812  | 0.615     | 0.825  | 0.766    | 0.646    | 0.307     | -0.010    | 0.932       | 0.665       | 0.662     | 0.741     | 0.966      | 0.833      | 0.978             | 0.815             | 0.973             | 0.935             | 0.964             | 0.955             |
| subject_14             | MSE     | 0.041       | 0.135  | 0.039     | 0.034  | 0.033    | 0.033    | 0.070     | 0.069     | 0.030       | 0.215       | 0.026     | 0.037     | 0.027      | 0.027      | 0.027             | 0.023             | 0.034             | 0.028             | 0.037             | 0.024             |
|                        | Pearson | 0.380       | 0.147  | 0.389     | 0.478  | 0.282    | 0.409    | -0.068    | 0.016     | 0.473       | 0.357       | 0.489     | 0.374     | 0.453      | 0.546      | 0.462             | 0.578             | 0.298             | 0.440             | 0.185             | 0.640             |
| subject_15             | MSE     | 0.139       | 0.050  | 0.027     | 0.021  | 0.007    | 0.016    | 0.018     | 0.034     | 0.006       | 0.085       | 0.009     | 0.012     | 0.007      | 0.010      | 0.004             | 0.006             | 0.004             | 0.005             | 0.005             | 0.005             |
|                        | Pearson | -0.184      | 0.040  | -0.050    | -0.104 | 0.239    | 0.000    | 0.097     | -0.083    | 0.072       | 0.150       | 0.008     | -0.019    | 0.280      | 0.080      | 0.178             | 0.049             | 0.234             | 0.096             | 0.266             | 0.083             |
| subject_16             | MSE     | 0.010       | 0.171  | 0.008     | 0.061  | 0.007    | 0.027    | 0.141     | 0.183     | 0.013       | 0.085       | 0.052     | 0.054     | 0.006      | 0.063      | 0.007             | 0.095             | 0.005             | 0.046             | 0.003             | 0.047             |
|                        | Pearson | 0.956       | 0.948  | 0.969     | 0.799  | 0.971    | 0.891    | 0.168     | -0.005    | 0.956       | 0.709       | 0.740     | 0.720     | 0.975      | 0.773      | 0.984             | 0.790             | 0.986             | 0.901             | 0.994             | 0.918             |
| subject_17             | MSE     | 0.026       | 0.058  | 0.015     | 0.003  | 0.003    | 0.012    | 0.015     | 0.050     | 0.004       | 0.064       | 0.005     | 0.006     | 0.003      | 0.008      | 0.002             | 0.004             | 0.002             | 0.004             | 0.002             | 0.004             |
|                        | Pearson | -0.005      | 0.102  | 0.036     | 0.100  | 0.225    | -0.074   | -0.019    | -0.033    | 0.222       | 0.230       | 0.115     | 0.112     | 0.028      | -0.031     | 0.328             | 0.075             | 0.265             | 0.200             | 0.285             | 0.117             |
| subject_18             | MSE     | 0.064       | 0.078  | 0.010     | 0.020  | 0.012    | 0.017    | 0.070     | 0.191     | 0.009       | 0.037       | 0.019     | 0.021     | 0.007      | 0.037      | 0.008             | 0.025             | 0.007             | 0.015             | 0.012             | 0.017             |
|                        | Pearson | -0.067      | -0.047 | -0.094    | 0.014  | 0.183    | 0.074    | 0.123     | -0.051    | 0.315       | 0.059       | 0.258     | 0.230     | 0.203      | -0.176     | 0.229             | -0.155            | 0.218             | -0.232            | 0.157             | -0.143            |
| subject_19             | MSE     | 0.174       | 0.031  | 0.026     | 0.010  | 0.007    | 0.015    | 0.018     | 0.025     | 0.011       | 0.057       | 0.011     | 0.012     | 0.005      | 0.007      | 0.007             | 0.007             | 0.008             | 0.006             | 0.007             | 0.004             |
| Continued on next page |         |             |        |           |        |          |          |           |           |             |             |           |           |            |            |                   |                   |                   |                   |                   |                   |

11229  
11230  
11231  
11232  
11233  
11234  
11235  
11236  
11237  
11238  
11239  
11240  
11241  
11242  
11243  
11244  
11245  
11246  
11247  
11248  
11249  
11250  
11251  
11252  
11253  
11254  
11255  
11256  
11257  
11258  
11259  
11260  
11261

|            |         | 11262       | 11263  | 11264     | 11265  | 11266    | 11267    | 11268     | 11269     | 11270       | 11271       | 11272     | 11273     | 11274      | 11275      | 11276             | 11277             | 11278             | 11279             | 11280             | 11281             | 11282 | 11283 | 11284 | 11285 | 11286 | 11287 | 11288 | 11289 | 11290 | 11291 | 11292 | 11293 | 11294 |
|------------|---------|-------------|--------|-----------|--------|----------|----------|-----------|-----------|-------------|-------------|-----------|-----------|------------|------------|-------------------|-------------------|-------------------|-------------------|-------------------|-------------------|-------|-------|-------|-------|-------|-------|-------|-------|-------|-------|-------|-------|-------|
| Subject    | Metric  | DeepConvnet | EEGNet | Conformer | CTNet  | BIOT (f) | BIOT (l) | BENDR (f) | BENDR (l) | CBraMod (f) | CBraMod (l) | EEGPT (f) | EEGPT (l) | LaBraM (f) | LaBraM (l) | STEEGformer-s (f) | STEEGformer-s (l) | STEEGformer-b (f) | STEEGformer-b (l) | STEEGformer-l (f) | STEEGformer-l (l) |       |       |       |       |       |       |       |       |       |       |       |       |       |
|            | Pearson | 0.602       | 0.578  | 0.711     | 0.487  | 0.620    | 0.488    | 0.183     | 0.107     | 0.574       | 0.406       | 0.250     | 0.361     | 0.754      | 0.541      | 0.500             | 0.516             | 0.550             | 0.569             | 0.606             | 0.636             |       |       |       |       |       |       |       |       |       |       |       |       |       |
| subject_2  | MSE     | 0.046       | 0.025  | 0.015     | 0.008  | 0.019    | 0.023    | 0.024     | 0.035     | 0.012       | 0.145       | 0.011     | 0.013     | 0.005      | 0.010      | 0.005             | 0.007             | 0.006             | 0.010             | 0.004             | 0.008             |       |       |       |       |       |       |       |       |       |       |       |       |       |
|            | Pearson | -0.329      | -0.209 | -0.243    | -0.203 | -0.245   | -0.101   | 0.024     | 0.067     | -0.097      | -0.268      | 0.130     | 0.048     | -0.092     | 0.006      | -0.060            | -0.105            | -0.063            | -0.241            | 0.008             | -0.214            |       |       |       |       |       |       |       |       |       |       |       |       |       |
| subject_20 | MSE     | 0.088       | 0.079  | 0.018     | 0.039  | 0.014    | 0.029    | 0.122     | 0.133     | 0.013       | 0.057       | 0.047     | 0.048     | 0.019      | 0.060      | 0.018             | 0.037             | 0.014             | 0.035             | 0.022             | 0.045             |       |       |       |       |       |       |       |       |       |       |       |       |       |
|            | Pearson | -0.049      | 0.114  | -0.024    | 0.261  | 0.125    | 0.006    | 0.064     | -0.093    | 0.070       | 0.160       | 0.312     | 0.336     | -0.008     | -0.215     | -0.010            | 0.131             | 0.034             | -0.039            | -0.007            | -0.115            |       |       |       |       |       |       |       |       |       |       |       |       |       |
| subject_21 | MSE     | 0.522       | 0.027  | 0.192     | 0.034  | 0.023    | 0.031    | 0.079     | 0.130     | 0.038       | 1.204       | 0.034     | 0.047     | 0.074      | 0.046      | 0.108             | 0.046             | 0.084             | 0.036             | 0.126             | 0.050             |       |       |       |       |       |       |       |       |       |       |       |       |       |
|            | Pearson | 0.618       | 0.629  | 0.347     | 0.613  | 0.629    | 0.536    | 0.252     | -0.091    | 0.563       | 0.387       | 0.544     | 0.466     | 0.470      | 0.640      | 0.383             | 0.711             | 0.467             | 0.660             | 0.450             | 0.674             |       |       |       |       |       |       |       |       |       |       |       |       |       |
| subject_3  | MSE     | 0.021       | 0.084  | 0.016     | 0.008  | 0.008    | 0.009    | 0.017     | 0.025     | 0.008       | 0.065       | 0.009     | 0.013     | 0.004      | 0.005      | 0.012             | 0.006             | 0.006             | 0.005             | 0.004             | 0.005             |       |       |       |       |       |       |       |       |       |       |       |       |       |
|            | Pearson | 0.285       | 0.468  | 0.288     | 0.385  | 0.328    | 0.336    | 0.091     | 0.139     | 0.441       | 0.177       | 0.154     | 0.190     | 0.586      | 0.260      | 0.263             | 0.372             | 0.543             | 0.360             | 0.720             | 0.403             |       |       |       |       |       |       |       |       |       |       |       |       |       |
| subject_4  | MSE     | 0.101       | 0.039  | 0.054     | 0.040  | 0.029    | 0.032    | 0.068     | 0.109     | 0.038       | 0.167       | 0.037     | 0.045     | 0.034      | 0.048      | 0.025             | 0.031             | 0.030             | 0.037             | 0.028             | 0.036             |       |       |       |       |       |       |       |       |       |       |       |       |       |
|            | Pearson | 0.022       | -0.037 | 0.050     | -0.209 | 0.228    | 0.264    | -0.027    | 0.036     | 0.092       | -0.108      | 0.033     | -0.104    | 0.067      | 0.089      | 0.161             | 0.060             | 0.239             | -0.058            | 0.149             | -0.022            |       |       |       |       |       |       |       |       |       |       |       |       |       |
| subject_5  | MSE     | 0.537       | 0.159  | 0.054     | 0.112  | 0.043    | 0.070    | 0.110     | 0.219     | 0.059       | 0.158       | 0.105     | 0.085     | 0.030      | 0.121      | 0.053             | 0.111             | 0.038             | 0.089             | 0.023             | 0.091             |       |       |       |       |       |       |       |       |       |       |       |       |       |
|            | Pearson | 0.842       | 0.778  | 0.865     | 0.699  | 0.857    | 0.779    | 0.558     | -0.026    | 0.807       | 0.726       | 0.609     | 0.709     | 0.905      | 0.673      | 0.820             | 0.705             | 0.878             | 0.784             | 0.926             | 0.790             |       |       |       |       |       |       |       |       |       |       |       |       |       |
| subject_6  | MSE     | 0.025       | 0.070  | 0.021     | 0.021  | 0.014    | 0.024    | 0.032     | 0.040     | 0.016       | 0.090       | 0.028     | 0.029     | 0.008      | 0.019      | 0.014             | 0.022             | 0.011             | 0.019             | 0.009             | 0.017             |       |       |       |       |       |       |       |       |       |       |       |       |       |
|            | Pearson | 0.124       | 0.588  | 0.513     | 0.400  | 0.611    | 0.388    | 0.083     | 0.069     | 0.577       | 0.283       | 0.110     | 0.081     | 0.809      | 0.516      | 0.676             | 0.387             | 0.744             | 0.501             | 0.787             | 0.631             |       |       |       |       |       |       |       |       |       |       |       |       |       |
| subject_7  | MSE     | 0.101       | 0.050  | 0.016     | 0.009  | 0.003    | 0.010    | 0.010     | 0.021     | 0.004       | 0.092       | 0.007     | 0.008     | 0.003      | 0.006      | 0.005             | 0.008             | 0.003             | 0.006             | 0.003             | 0.006             |       |       |       |       |       |       |       |       |       |       |       |       |       |
|            | Pearson | -0.013      | 0.309  | 0.262     | -0.066 | 0.585    | -0.017   | 0.112     | -0.016    | 0.512       | 0.536       | 0.098     | 0.063     | 0.670      | 0.102      | 0.451             | -0.146            | 0.650             | 0.170             | 0.721             | 0.145             |       |       |       |       |       |       |       |       |       |       |       |       |       |
| subject_8  | MSE     | 0.337       | 0.057  | 0.055     | 0.052  | 0.014    | 0.023    | 0.071     | 0.133     | 0.025       | 0.100       | 0.015     | 0.017     | 0.013      | 0.030      | 0.015             | 0.025             | 0.016             | 0.021             | 0.018             | 0.017             |       |       |       |       |       |       |       |       |       |       |       |       |       |
|            | Pearson | 0.887       | 0.865  | 0.930     | 0.832  | 0.934    | 0.920    | 0.574     | -0.011    | 0.940       | 0.731       | 0.920     | 0.909     | 0.939      | 0.899      | 0.928             | 0.898             | 0.926             | 0.901             | 0.931             | 0.918             |       |       |       |       |       |       |       |       |       |       |       |       |       |
| subject_9  | MSE     | 0.020       | 0.030  | 0.016     | 0.005  | 0.006    | 0.016    | 0.016     | 0.036     | 0.009       | 0.057       | 0.010     | 0.012     | 0.008      | 0.009      | 0.005             | 0.005             | 0.005             | 0.006             | 0.008             | 0.004             |       |       |       |       |       |       |       |       |       |       |       |       |       |
|            | Pearson | 0.028       | 0.306  | 0.048     | 0.167  | 0.283    | 0.062    | -0.007    | 0.010     | 0.100       | 0.146       | 0.033     | 0.046     | 0.099      | 0.066      | 0.282             | 0.137             | 0.307             | 0.186             | 0.215             | 0.257             |       |       |       |       |       |       |       |       |       |       |       |       |       |



## H.2.2 PER-SUBJECT ZERO-SHOT TRANSFER

Table 91: Average Zero-Shot Transfer Performance Across All Subjects

| Model (Training strategy) | MSE                         | Pearson                     |
|---------------------------|-----------------------------|-----------------------------|
| <b>DeepConvnet</b>        | 0.244<br>$\pm 0.215$        | 0.157<br>$\pm 0.119$        |
| <b>EEGNet</b>             | 0.148<br>$\pm 0.046$        | 0.223<br>$\pm 0.080$        |
| <b>Conformer</b>          | 0.147<br>$\pm 0.044$        | 0.158<br>$\pm 0.074$        |
| <b>CTNet</b>              | 0.108<br>$\pm 0.040$        | 0.210<br>$\pm 0.064$        |
| <b>BIOT (f)</b>           | 0.145<br>$\pm 0.086$        | 0.150<br>$\pm 0.136$        |
| <b>BIOT (l)</b>           | 0.124<br>$\pm 0.039$        | 0.111<br>$\pm 0.123$        |
| <b>BENDR (f)</b>          | 0.117<br>$\pm 0.028$        | 0.032<br>$\pm 0.040$        |
| <b>BENDR (l)</b>          | 0.135<br>$\pm 0.031$        | 0.001<br>$\pm 0.012$        |
| <b>CBraMod (f)</b>        | 0.098<br>$\pm 0.029$        | 0.251<br>$\pm 0.087$        |
| <b>CBraMod (l)</b>        | 0.173<br>$\pm 0.125$        | 0.263<br>$\pm 0.059$        |
| <b>EEGPT (f)</b>          | 0.095<br>$\pm 0.021$        | 0.241<br>$\pm 0.091$        |
| <b>EEGPT (l)</b>          | 0.103<br>$\pm 0.025$        | 0.247<br>$\pm 0.093$        |
| <b>LaBraM (f)</b>         | 0.104<br>$\pm 0.042$        | 0.269<br>$\pm 0.102$        |
| <b>LaBraM (l)</b>         | 0.084<br>$\pm 0.019$        | 0.285<br>$\pm 0.077$        |
| <b>STEEGformer-s (f)</b>  | 0.100<br>$\pm 0.040$        | 0.257<br>$\pm 0.076$        |
| <b>STEEGformer-s (l)</b>  | 0.083<br>$\pm 0.013$        | 0.270<br>$\pm 0.104$        |
| <b>STEEGformer-b (f)</b>  | 0.106<br>$\pm 0.046$        | 0.263<br>$\pm 0.075$        |
| <b>STEEGformer-b (l)</b>  | <b>0.083</b><br>$\pm 0.019$ | 0.281<br>$\pm 0.055$        |
| <b>STEEGformer-l (f)</b>  | 0.095<br>$\pm 0.032$        | <b>0.303</b><br>$\pm 0.088$ |
| <b>STEEGformer-l (l)</b>  | <b>0.075</b><br>$\pm 0.019$ | <b>0.327</b><br>$\pm 0.075$ |

Table 92: Per-Subject Zero-Shot Transfer Performance

|            |         | DeepConvnet      | EEGNet          | Conformer       | CTNet           | BIOT (f)         | BIOT (l)         | BENDR (f)        | BENDR (l)        | CBraMod (f)     | CBraMod (l)     | EEGPT (f)       | EEGPT (l)       | LaBraM (f)       | LaBraM (l)      | STEEGformer-s (f) | STEEGformer-s (l) | STEEGformer-b (f) | STEEGformer-b (l) | STEEGformer-l (f) | STEEGformer-l (l) |
|------------|---------|------------------|-----------------|-----------------|-----------------|------------------|------------------|------------------|------------------|-----------------|-----------------|-----------------|-----------------|------------------|-----------------|-------------------|-------------------|-------------------|-------------------|-------------------|-------------------|
| subject_1  | MSE     | 0.078<br>±0.066  | 0.137<br>±0.116 | 0.148<br>±0.169 | 0.078<br>±0.063 | 0.073<br>±0.067  | 0.077<br>±0.069  | 0.099<br>±0.060  | 0.161<br>±0.072  | 0.064<br>±0.070 | 0.127<br>±0.095 | 0.065<br>±0.076 | 0.071<br>±0.086 | 0.063<br>±0.063  | 0.076<br>±0.071 | 0.064<br>±0.067   | 0.068<br>±0.061   | 0.074<br>±0.069   | 0.071<br>±0.065   | 0.067<br>±0.064   | 0.064<br>±0.059   |
|            | Pearson | 0.147<br>±0.300  | 0.231<br>±0.313 | 0.217<br>±0.345 | 0.200<br>±0.325 | 0.068<br>±0.416  | 0.140<br>±0.317  | 0.078<br>±0.181  | -0.000<br>±0.064 | 0.321<br>±0.307 | 0.312<br>±0.236 | 0.352<br>±0.289 | 0.344<br>±0.308 | 0.326<br>±0.290  | 0.262<br>±0.329 | 0.295<br>±0.341   | 0.288<br>±0.331   | 0.214<br>±0.354   | 0.266<br>±0.340   | 0.244<br>±0.364   | 0.226<br>±0.361   |
| subject_10 | MSE     | 0.241<br>±0.224  | 0.124<br>±0.129 | 0.090<br>±0.073 | 0.078<br>±0.079 | 0.073<br>±0.059  | 0.091<br>±0.082  | 0.097<br>±0.091  | 0.103<br>±0.086  | 0.080<br>±0.056 | 0.170<br>±0.127 | 0.072<br>±0.058 | 0.077<br>±0.057 | 0.071<br>±0.058  | 0.073<br>±0.074 | 0.064<br>±0.050   | 0.069<br>±0.070   | 0.064<br>±0.046   | 0.065<br>±0.061   | 0.057<br>±0.048   | 0.058<br>±0.054   |
|            | Pearson | 0.029<br>±0.168  | 0.230<br>±0.244 | 0.041<br>±0.127 | 0.136<br>±0.229 | 0.239<br>±0.336  | -0.021<br>±0.297 | -0.002<br>±0.070 | -0.012<br>±0.064 | 0.200<br>±0.244 | 0.174<br>±0.277 | 0.207<br>±0.242 | 0.167<br>±0.266 | 0.319<br>±0.300  | 0.344<br>±0.299 | 0.237<br>±0.341   | 0.332<br>±0.320   | 0.287<br>±0.366   | 0.240<br>±0.400   | 0.405<br>±0.346   | 0.384<br>±0.350   |
| subject_11 | MSE     | 0.224<br>±0.239  | 0.141<br>±0.157 | 0.121<br>±0.109 | 0.078<br>±0.083 | 0.127<br>±0.121  | 0.100<br>±0.071  | 0.094<br>±0.098  | 0.104<br>±0.100  | 0.087<br>±0.096 | 0.087<br>±0.070 | 0.078<br>±0.080 | 0.080<br>±0.077 | 0.096<br>±0.100  | 0.072<br>±0.075 | 0.087<br>±0.090   | 0.079<br>±0.080   | 0.084<br>±0.081   | 0.079<br>±0.079   | 0.071<br>±0.064   | 0.074<br>±0.078   |
|            | Pearson | 0.075<br>±0.283  | 0.112<br>±0.205 | 0.143<br>±0.236 | 0.149<br>±0.312 | -0.046<br>±0.331 | 0.099<br>±0.328  | 0.019<br>±0.112  | -0.012<br>±0.063 | 0.131<br>±0.225 | 0.209<br>±0.295 | 0.215<br>±0.251 | 0.167<br>±0.246 | -0.050<br>±0.321 | 0.303<br>±0.369 | 0.152<br>±0.225   | 0.210<br>±0.367   | 0.118<br>±0.295   | 0.181<br>±0.325   | 0.284<br>±0.331   | 0.271<br>±0.351   |
| subject_12 | MSE     | 0.260<br>±0.171  | 0.239<br>±0.207 | 0.101<br>±0.089 | 0.086<br>±0.059 | 0.130<br>±0.116  | 0.173<br>±0.128  | 0.152<br>±0.078  | 0.197<br>±0.070  | 0.179<br>±0.149 | 0.216<br>±0.171 | 0.103<br>±0.113 | 0.114<br>±0.115 | 0.179<br>±0.140  | 0.100<br>±0.091 | 0.181<br>±0.135   | 0.082<br>±0.096   | 0.172<br>±0.144   | 0.106<br>±0.103   | 0.130<br>±0.114   | 0.106<br>±0.109   |
|            | Pearson | 0.250<br>±0.292  | 0.259<br>±0.288 | 0.225<br>±0.278 | 0.196<br>±0.262 | 0.226<br>±0.303  | 0.157<br>±0.279  | 0.006<br>±0.118  | 0.003<br>±0.113  | 0.205<br>±0.276 | 0.254<br>±0.198 | 0.262<br>±0.274 | 0.265<br>±0.265 | 0.141<br>±0.325  | 0.226<br>±0.270 | 0.110<br>±0.256   | 0.332<br>±0.358   | 0.199<br>±0.281   | 0.273<br>±0.353   | 0.270<br>±0.304   | 0.283<br>±0.370   |
| subject_13 | MSE     | 0.072<br>±0.067  | 0.081<br>±0.083 | 0.272<br>±0.150 | 0.210<br>±0.147 | 0.164<br>±0.126  | 0.181<br>±0.130  | 0.208<br>±0.111  | 0.201<br>±0.096  | 0.157<br>±0.117 | 0.076<br>±0.077 | 0.167<br>±0.124 | 0.158<br>±0.131 | 0.239<br>±0.150  | 0.142<br>±0.104 | 0.225<br>±0.151   | 0.104<br>±0.094   | 0.263<br>±0.152   | 0.122<br>±0.107   | 0.204<br>±0.145   | 0.130<br>±0.110   |
|            | Pearson | 0.059<br>±0.207  | 0.271<br>±0.268 | 0.070<br>±0.217 | 0.225<br>±0.301 | 0.134<br>±0.292  | 0.034<br>±0.251  | 0.017<br>±0.129  | -0.000<br>±0.099 | 0.219<br>±0.311 | 0.245<br>±0.244 | 0.156<br>±0.310 | 0.181<br>±0.275 | 0.259<br>±0.266  | 0.174<br>±0.280 | 0.180<br>±0.291   | 0.220<br>±0.345   | 0.150<br>±0.270   | 0.268<br>±0.346   | 0.235<br>±0.306   | 0.265<br>±0.343   |
| subject_14 | MSE     | 0.092<br>±0.105  | 0.135<br>±0.121 | 0.186<br>±0.174 | 0.105<br>±0.082 | 0.100<br>±0.099  | 0.094<br>±0.074  | 0.133<br>±0.073  | 0.127<br>±0.067  | 0.071<br>±0.068 | 0.268<br>±0.198 | 0.087<br>±0.098 | 0.105<br>±0.145 | 0.094<br>±0.098  | 0.075<br>±0.066 | 0.082<br>±0.093   | 0.067<br>±0.063   | 0.083<br>±0.090   | 0.063<br>±0.062   | 0.105<br>±0.121   | 0.061<br>±0.063   |
|            | Pearson | -0.012<br>±0.174 | 0.170<br>±0.286 | 0.083<br>±0.320 | 0.155<br>±0.311 | 0.231<br>±0.297  | 0.066<br>±0.261  | -0.015<br>±0.090 | -0.002<br>±0.085 | 0.309<br>±0.334 | 0.261<br>±0.355 | 0.310<br>±0.294 | 0.316<br>±0.292 | 0.260<br>±0.376  | 0.346<br>±0.305 | 0.298<br>±0.389   | 0.324<br>±0.375   | 0.312<br>±0.356   | 0.322<br>±0.365   | 0.356<br>±0.353   | 0.397<br>±0.358   |
| subject_15 | MSE     | 0.268<br>±0.219  | 0.166<br>±0.164 | 0.193<br>±0.159 | 0.083<br>±0.073 | 0.093<br>±0.114  | 0.101<br>±0.093  | 0.090<br>±0.070  | 0.108<br>±0.085  | 0.058<br>±0.053 | 0.141<br>±0.150 | 0.069<br>±0.063 | 0.076<br>±0.070 | 0.068<br>±0.071  | 0.072<br>±0.066 | 0.063<br>±0.065   | 0.073<br>±0.071   | 0.055<br>±0.049   | 0.066<br>±0.059   | 0.056<br>±0.053   | 0.059<br>±0.053   |

Continued on next page

| Subject               | Metric  | DeepConvnet     | EEGNet          | Conformer       | CTNet           | BIOT (f)         | BIOT (l)         | BENDR (f)        | BENDR (l)        | CBraMod (f)                    | CBraMod (l)     | EEGPT (f)       | EEGPT (l)       | LaBraM (f)                     | LaBraM (l)                     | STEEGformer-s (f) | STEEGformer-s (l)              | STEEGformer-h (f) | STEEGformer-h (l)              | STEEGformer-l (f)              | STEEGformer-l (l)              |
|-----------------------|---------|-----------------|-----------------|-----------------|-----------------|------------------|------------------|------------------|------------------|--------------------------------|-----------------|-----------------|-----------------|--------------------------------|--------------------------------|-------------------|--------------------------------|-------------------|--------------------------------|--------------------------------|--------------------------------|
| subject <sub>16</sub> | Pearson | 0.203<br>±0.244 | 0.164<br>±0.273 | 0.084<br>±0.349 | 0.125<br>±0.235 | 0.283<br>±0.252  | 0.161<br>±0.313  | 0.030<br>±0.128  | -0.004<br>±0.069 | 0.326<br>±0.356                | 0.334<br>±0.331 | 0.323<br>±0.281 | 0.317<br>±0.312 | 0.239<br>±0.369                | 0.340<br>±0.289                | 0.285<br>±0.336   | <b>0.346</b><br>± <b>0.321</b> | 0.275<br>±0.338   | 0.278<br>±0.405                | 0.316<br>±0.356                | 0.400<br>± 0.344               |
|                       | MSE     | 0.126<br>±0.091 | 0.132<br>±0.119 | 0.154<br>±0.120 | 0.104<br>±0.077 | 0.131<br>±0.141  | 0.143<br>±0.167  | 0.139<br>±0.076  | 0.184<br>±0.075  | 0.122<br>±0.109                | 0.270<br>±0.163 | 0.094<br>±0.094 | 0.098<br>±0.106 | 0.089<br>±0.087                | 0.105<br>±0.097                | 0.114<br>±0.133   | <b>0.073</b><br>± <b>0.073</b> | 0.105<br>±0.120   | 0.092<br>±0.090                | 0.086<br>±0.092                | 0.059<br>± 0.061               |
|                       | Pearson | 0.238<br>±0.301 | 0.178<br>±0.324 | 0.195<br>±0.287 | 0.150<br>±0.343 | 0.274<br>±0.358  | 0.210<br>±0.302  | 0.014<br>±0.119  | 0.021<br>±0.065  | 0.301<br>±0.288                | 0.230<br>±0.258 | 0.316<br>±0.272 | 0.288<br>±0.281 | <b>0.390</b><br>± <b>0.316</b> | 0.329<br>±0.317                | 0.344<br>±0.331   | 0.235<br>±0.331                | 0.349<br>±0.358   | 0.219<br>±0.362                | 0.424<br>± 0.314               | 0.314<br>±0.342                |
| subject <sub>17</sub> | MSE     | 0.097<br>±0.123 | 0.141<br>±0.182 | 0.157<br>±0.169 | 0.079<br>±0.079 | 0.089<br>±0.084  | 0.100<br>±0.097  | 0.109<br>±0.080  | 0.127<br>±0.065  | 0.098<br>±0.092                | 0.100<br>±0.092 | 0.092<br>±0.080 | 0.098<br>±0.089 | 0.086<br>±0.078                | 0.081<br>±0.061                | 0.085<br>±0.076   | 0.094<br>±0.096                | 0.075<br>± 0.067  | <b>0.079</b><br>± <b>0.073</b> | 0.103<br>±0.089                | 0.089<br>±0.082                |
|                       | Pearson | 0.160<br>±0.304 | 0.114<br>±0.352 | 0.124<br>±0.301 | 0.247<br>±0.271 | 0.182<br>±0.336  | 0.022<br>±0.285  | 0.120<br>±0.283  | -0.015<br>±0.075 | 0.173<br>±0.291                | 0.247<br>±0.273 | 0.173<br>±0.286 | 0.095<br>±0.316 | 0.252<br>±0.302                | <b>0.316</b><br>± <b>0.304</b> | 0.220<br>±0.326   | 0.264<br>±0.367                | 0.343<br>± 0.291  | 0.293<br>±0.384                | 0.272<br>±0.320                | 0.250<br>±0.354                |
|                       | MSE     | 0.151<br>±0.108 | 0.130<br>±0.113 | 0.108<br>±0.086 | 0.096<br>±0.068 | 0.106<br>±0.120  | 0.097<br>±0.123  | 0.141<br>±0.091  | 0.165<br>±0.069  | <b>0.071</b><br>± <b>0.075</b> | 0.132<br>±0.128 | 0.090<br>±0.109 | 0.098<br>±0.126 | 0.127<br>±0.151                | 0.073<br>±0.076                | 0.087<br>±0.111   | 0.072<br>±0.076                | 0.107<br>±0.129   | 0.075<br>±0.067                | 0.116<br>±0.136                | 0.066<br>± 0.084               |
| subject <sub>18</sub> | Pearson | 0.368<br>±0.343 | 0.346<br>±0.308 | 0.273<br>±0.290 | 0.317<br>±0.326 | 0.284<br>±0.275  | 0.276<br>±0.297  | 0.095<br>±0.171  | 0.007<br>±0.096  | <b>0.425</b><br>± <b>0.339</b> | 0.348<br>±0.284 | 0.394<br>±0.321 | 0.402<br>±0.309 | 0.357<br>±0.344                | 0.392<br>±0.324                | 0.352<br>±0.361   | 0.395<br>±0.330                | 0.372<br>±0.323   | 0.386<br>±0.350                | 0.383<br>±0.359                | 0.448<br>± 0.349               |
|                       | MSE     | 0.311<br>±0.260 | 0.146<br>±0.161 | 0.094<br>±0.068 | 0.075<br>±0.076 | 0.084<br>±0.093  | 0.099<br>±0.070  | 0.095<br>±0.087  | 0.103<br>±0.085  | 0.078<br>±0.068                | 0.110<br>±0.085 | 0.081<br>±0.077 | 0.075<br>±0.066 | 0.073<br>±0.065                | 0.070<br>±0.069                | 0.073<br>±0.063   | 0.079<br>±0.081                | 0.069<br>±0.054   | 0.067<br>± 0.063               | 0.072<br>±0.057                | <b>0.068</b><br>± <b>0.064</b> |
|                       | Pearson | 0.140<br>±0.252 | 0.080<br>±0.270 | 0.092<br>±0.198 | 0.237<br>±0.270 | 0.170<br>±0.248  | 0.173<br>±0.265  | 0.024<br>±0.116  | -0.003<br>±0.105 | 0.162<br>±0.295                | 0.255<br>±0.291 | 0.224<br>±0.245 | 0.287<br>±0.254 | 0.210<br>±0.313                | 0.316<br>±0.316                | 0.172<br>±0.217   | 0.283<br>±0.371                | 0.268<br>±0.331   | <b>0.347</b><br>± <b>0.344</b> | 0.306<br>±0.332                | 0.370<br>± 0.379               |
| subject <sub>2</sub>  | MSE     | 0.303<br>±0.271 | 0.172<br>±0.168 | 0.119<br>±0.138 | 0.114<br>±0.125 | 0.248<br>±0.355  | 0.182<br>±0.188  | 0.113<br>±0.130  | 0.125<br>±0.133  | 0.108<br>±0.131                | 0.088<br>±0.074 | 0.109<br>±0.129 | 0.101<br>±0.093 | 0.099<br>±0.107                | 0.094<br>±0.121                | 0.077<br>± 0.059  | 0.095<br>±0.116                | 0.100<br>±0.109   | <b>0.081</b><br>± <b>0.085</b> | 0.095<br>±0.112                | 0.092<br>±0.105                |
|                       | Pearson | 0.081<br>±0.180 | 0.199<br>±0.226 | 0.215<br>±0.250 | 0.229<br>±0.238 | -0.237<br>±0.359 | -0.039<br>±0.339 | -0.005<br>±0.106 | 0.013<br>±0.088  | 0.103<br>±0.218                | 0.148<br>±0.282 | 0.136<br>±0.181 | 0.273<br>±0.260 | 0.275<br>±0.335                | 0.295<br>±0.357                | 0.287<br>±0.296   | 0.239<br>±0.342                | 0.265<br>±0.301   | <b>0.298</b><br>± <b>0.375</b> | 0.220<br>±0.305                | 0.387<br>± 0.350               |
|                       | MSE     | 0.109<br>±0.081 | 0.120<br>±0.110 | 0.151<br>±0.070 | 0.122<br>±0.120 | 0.142<br>±0.133  | 0.118<br>±0.072  | 0.141<br>±0.110  | 0.151<br>±0.098  | 0.097<br>±0.090                | 0.125<br>±0.107 | 0.106<br>±0.081 | 0.161<br>±0.109 | 0.155<br>±0.153                | 0.062<br>±0.063                | 0.105<br>±0.072   | 0.071<br>±0.073                | 0.164<br>±0.150   | <b>0.058</b><br>± <b>0.055</b> | 0.126<br>±0.128                | 0.047<br>± 0.044               |
| subject <sub>20</sub> | Pearson | 0.311<br>±0.303 | 0.212<br>±0.393 | 0.156<br>±0.261 | 0.194<br>±0.418 | 0.240<br>±0.264  | 0.211<br>±0.325  | -0.002<br>±0.079 | -0.006<br>±0.066 | 0.345<br>±0.318                | 0.317<br>±0.249 | 0.093<br>±0.349 | 0.059<br>±0.347 | 0.412<br>± 0.304               | 0.160<br>±0.330                | 0.271<br>±0.311   | 0.167<br>±0.368                | 0.327<br>±0.337   | 0.216<br>±0.402                | <b>0.388</b><br>± <b>0.328</b> | 0.281<br>±0.389                |
|                       | MSE     | 1.016<br>±0.468 | 0.287<br>±0.158 | 0.141<br>±0.106 | 0.197<br>±0.125 | 0.218<br>±0.222  | 0.155<br>±0.103  | 0.137<br>±0.135  | 0.140<br>±0.119  | 0.102<br>±0.066                | 0.660<br>±0.364 | 0.099<br>±0.089 | 0.127<br>±0.108 | <b>0.093</b><br>± <b>0.065</b> | 0.094<br>±0.072                | 0.107<br>±0.067   | 0.096<br>±0.063                | 0.127<br>±0.083   | 0.127<br>±0.092                | 0.099<br>±0.069                | 0.070<br>± 0.057               |
|                       | Pearson | 0.182<br>±0.324 | 0.316<br>±0.300 | 0.185<br>±0.275 | 0.299<br>±0.305 | 0.229<br>±0.281  | 0.244<br>±0.315  | 0.060<br>±0.101  | -0.011<br>±0.094 | 0.340<br>±0.307                | 0.290<br>±0.281 | 0.322<br>±0.320 | 0.315<br>±0.303 | 0.333<br>±0.349                | <b>0.376</b><br>± <b>0.348</b> | 0.314<br>±0.358   | 0.330<br>±0.393                | 0.313<br>±0.337   | 0.357<br>±0.384                | 0.364<br>±0.333                | 0.377<br>± 0.412               |

Continued on next page

| Subject   | Metric  | DeepConvnet                                       | EEGNet                                           | Conformer                                        | CTNet                                            | BIOT <sup>(j)</sup>                                                | BIOT <sup>(i)</sup>                               | BENDR <sup>(j)</sup>                              | BENDR <sup>(i)</sup>                              | CBraMod <sup>(j)</sup>                           | CBraMod <sup>(i)</sup>                           | EEGPT <sup>(j)</sup>                             | EEGPT <sup>(i)</sup>                             | LaBraM <sup>(i)</sup>                                              | LaBraM <sup>(j)</sup>                                              | STEEGformer-s <sup>(j)</sup>                                       | STEEGformer-s <sup>(i)</sup>                                       | STEEGformer-s <sup>(j)</sup>                     | STEEGformer-s <sup>(i)</sup>                                       | STEEGformer-l <sup>(j)</sup>                                       | STEEGformer-l <sup>(i)</sup>                                       |
|-----------|---------|---------------------------------------------------|--------------------------------------------------|--------------------------------------------------|--------------------------------------------------|--------------------------------------------------------------------|---------------------------------------------------|---------------------------------------------------|---------------------------------------------------|--------------------------------------------------|--------------------------------------------------|--------------------------------------------------|--------------------------------------------------|--------------------------------------------------------------------|--------------------------------------------------------------------|--------------------------------------------------------------------|--------------------------------------------------------------------|--------------------------------------------------|--------------------------------------------------------------------|--------------------------------------------------------------------|--------------------------------------------------------------------|
| subject.3 | MSE     | $\begin{matrix} 0.071 \\ \pm 0.043 \end{matrix}$  | $\begin{matrix} 0.084 \\ \pm 0.102 \end{matrix}$ | $\begin{matrix} 0.166 \\ \pm 0.189 \end{matrix}$ | $\begin{matrix} 0.109 \\ \pm 0.123 \end{matrix}$ | $\begin{matrix} 0.436 \\ \pm 0.676 \end{matrix}$                   | $\begin{matrix} 0.197 \\ \pm 0.169 \end{matrix}$  | $\begin{matrix} 0.112 \\ \pm 0.070 \end{matrix}$  | $\begin{matrix} 0.112 \\ \pm 0.076 \end{matrix}$  | $\begin{matrix} 0.095 \\ \pm 0.065 \end{matrix}$ | $\begin{matrix} 0.115 \\ \pm 0.138 \end{matrix}$ | $\begin{matrix} 0.119 \\ \pm 0.079 \end{matrix}$ | $\begin{matrix} 0.120 \\ \pm 0.094 \end{matrix}$ | $\begin{matrix} 0.121 \\ \pm 0.105 \end{matrix}$                   | $\begin{matrix} 0.112 \\ \pm 0.083 \end{matrix}$                   | $\begin{matrix} 0.136 \\ \pm 0.093 \end{matrix}$                   | $\begin{matrix} 0.084 \\ \pm 0.076 \end{matrix}$                   | $\begin{matrix} 0.106 \\ \pm 0.082 \end{matrix}$ | $\begin{matrix} 0.100 \\ \pm 0.071 \end{matrix}$                   | $\begin{matrix} \mathbf{0.077} \\ \pm \mathbf{0.073} \end{matrix}$ | $\begin{matrix} 0.087 \\ \pm 0.064 \end{matrix}$                   |
|           | Pearson | $\begin{matrix} 0.278 \\ \pm 0.281 \end{matrix}$  | $\begin{matrix} 0.288 \\ \pm 0.357 \end{matrix}$ | $\begin{matrix} 0.191 \\ \pm 0.349 \end{matrix}$ | $\begin{matrix} 0.310 \\ \pm 0.318 \end{matrix}$ | $\begin{matrix} -0.093 \\ \pm 0.434 \end{matrix}$                  | $\begin{matrix} 0.030 \\ \pm 0.337 \end{matrix}$  | $\begin{matrix} 0.018 \\ \pm 0.135 \end{matrix}$  | $\begin{matrix} -0.011 \\ \pm 0.064 \end{matrix}$ | $\begin{matrix} 0.248 \\ \pm 0.324 \end{matrix}$ | $\begin{matrix} 0.173 \\ \pm 0.282 \end{matrix}$ | $\begin{matrix} 0.228 \\ \pm 0.261 \end{matrix}$ | $\begin{matrix} 0.275 \\ \pm 0.282 \end{matrix}$ | $\begin{matrix} \mathbf{0.345} \\ \pm \mathbf{0.301} \end{matrix}$ | $\begin{matrix} 0.176 \\ \pm 0.319 \end{matrix}$                   | $\begin{matrix} 0.302 \\ \pm 0.334 \end{matrix}$                   | $\begin{matrix} 0.323 \\ \pm 0.372 \end{matrix}$                   | $\begin{matrix} 0.280 \\ \pm 0.341 \end{matrix}$ | $\begin{matrix} 0.255 \\ \pm 0.353 \end{matrix}$                   | $\begin{matrix} 0.394 \\ \pm 0.341 \end{matrix}$                   | $\begin{matrix} 0.277 \\ \pm 0.355 \end{matrix}$                   |
| subject.4 | MSE     | $\begin{matrix} 0.272 \\ \pm 0.192 \end{matrix}$  | $\begin{matrix} 0.137 \\ \pm 0.132 \end{matrix}$ | $\begin{matrix} 0.090 \\ \pm 0.084 \end{matrix}$ | $\begin{matrix} 0.100 \\ \pm 0.097 \end{matrix}$ | $\begin{matrix} 0.107 \\ \pm 0.148 \end{matrix}$                   | $\begin{matrix} 0.062 \\ \pm 0.056 \end{matrix}$  | $\begin{matrix} 0.096 \\ \pm 0.088 \end{matrix}$  | $\begin{matrix} 0.132 \\ \pm 0.086 \end{matrix}$  | $\begin{matrix} 0.080 \\ \pm 0.073 \end{matrix}$ | $\begin{matrix} 0.104 \\ \pm 0.084 \end{matrix}$ | $\begin{matrix} 0.080 \\ \pm 0.074 \end{matrix}$ | $\begin{matrix} 0.081 \\ \pm 0.072 \end{matrix}$ | $\begin{matrix} 0.072 \\ \pm 0.088 \end{matrix}$                   | $\begin{matrix} \mathbf{0.066} \\ \pm \mathbf{0.066} \end{matrix}$ | $\begin{matrix} 0.078 \\ \pm 0.080 \end{matrix}$                   | $\begin{matrix} 0.089 \\ \pm 0.067 \end{matrix}$                   | $\begin{matrix} 0.084 \\ \pm 0.092 \end{matrix}$ | $\begin{matrix} 0.076 \\ \pm 0.069 \end{matrix}$                   | $\begin{matrix} 0.079 \\ \pm 0.081 \end{matrix}$                   | $\begin{matrix} 0.069 \\ \pm 0.065 \end{matrix}$                   |
|           | Pearson | $\begin{matrix} 0.277 \\ \pm 0.286 \end{matrix}$  | $\begin{matrix} 0.290 \\ \pm 0.278 \end{matrix}$ | $\begin{matrix} 0.150 \\ \pm 0.283 \end{matrix}$ | $\begin{matrix} 0.201 \\ \pm 0.300 \end{matrix}$ | $\begin{matrix} 0.169 \\ \pm 0.262 \end{matrix}$                   | $\begin{matrix} 0.270 \\ \pm 0.329 \end{matrix}$  | $\begin{matrix} 0.052 \\ \pm 0.126 \end{matrix}$  | $\begin{matrix} 0.017 \\ \pm 0.087 \end{matrix}$  | $\begin{matrix} 0.330 \\ \pm 0.272 \end{matrix}$ | $\begin{matrix} 0.315 \\ \pm 0.275 \end{matrix}$ | $\begin{matrix} 0.316 \\ \pm 0.283 \end{matrix}$ | $\begin{matrix} 0.252 \\ \pm 0.288 \end{matrix}$ | $\begin{matrix} 0.203 \\ \pm 0.283 \end{matrix}$                   | $\begin{matrix} 0.352 \\ \pm 0.334 \end{matrix}$                   | $\begin{matrix} 0.212 \\ \pm 0.357 \end{matrix}$                   | $\begin{matrix} \mathbf{0.377} \\ \pm \mathbf{0.357} \end{matrix}$ | $\begin{matrix} 0.217 \\ \pm 0.330 \end{matrix}$ | $\begin{matrix} 0.331 \\ \pm 0.322 \end{matrix}$                   | $\begin{matrix} 0.232 \\ \pm 0.309 \end{matrix}$                   | $\begin{matrix} 0.406 \\ \pm 0.334 \end{matrix}$                   |
| subject.5 | MSE     | $\begin{matrix} 0.503 \\ \pm 0.278 \end{matrix}$  | $\begin{matrix} 0.112 \\ \pm 0.110 \end{matrix}$ | $\begin{matrix} 0.177 \\ \pm 0.191 \end{matrix}$ | $\begin{matrix} 0.089 \\ \pm 0.112 \end{matrix}$ | $\begin{matrix} 0.253 \\ \pm 0.485 \end{matrix}$                   | $\begin{matrix} 0.085 \\ \pm 0.121 \end{matrix}$  | $\begin{matrix} 0.096 \\ \pm 0.077 \end{matrix}$  | $\begin{matrix} 0.138 \\ \pm 0.088 \end{matrix}$  | $\begin{matrix} 0.094 \\ \pm 0.094 \end{matrix}$ | $\begin{matrix} 0.110 \\ \pm 0.059 \end{matrix}$ | $\begin{matrix} 0.104 \\ \pm 0.133 \end{matrix}$ | $\begin{matrix} 0.117 \\ \pm 0.151 \end{matrix}$ | $\begin{matrix} 0.085 \\ \pm 0.072 \end{matrix}$                   | $\begin{matrix} \mathbf{0.060} \\ \pm \mathbf{0.060} \end{matrix}$ | $\begin{matrix} 0.076 \\ \pm 0.095 \end{matrix}$                   | $\begin{matrix} 0.073 \\ \pm 0.077 \end{matrix}$                   | $\begin{matrix} 0.095 \\ \pm 0.101 \end{matrix}$ | $\begin{matrix} 0.064 \\ \pm 0.064 \end{matrix}$                   | $\begin{matrix} 0.074 \\ \pm 0.107 \end{matrix}$                   | $\begin{matrix} 0.054 \\ \pm 0.056 \end{matrix}$                   |
|           | Pearson | $\begin{matrix} 0.311 \\ \pm 0.398 \end{matrix}$  | $\begin{matrix} 0.382 \\ \pm 0.280 \end{matrix}$ | $\begin{matrix} 0.285 \\ \pm 0.308 \end{matrix}$ | $\begin{matrix} 0.296 \\ \pm 0.338 \end{matrix}$ | $\begin{matrix} 0.144 \\ \pm 0.368 \end{matrix}$                   | $\begin{matrix} 0.306 \\ \pm 0.276 \end{matrix}$  | $\begin{matrix} 0.107 \\ \pm 0.197 \end{matrix}$  | $\begin{matrix} 0.006 \\ \pm 0.064 \end{matrix}$  | $\begin{matrix} 0.320 \\ \pm 0.353 \end{matrix}$ | $\begin{matrix} 0.329 \\ \pm 0.274 \end{matrix}$ | $\begin{matrix} 0.278 \\ \pm 0.310 \end{matrix}$ | $\begin{matrix} 0.318 \\ \pm 0.295 \end{matrix}$ | $\begin{matrix} 0.346 \\ \pm 0.335 \end{matrix}$                   | $\begin{matrix} 0.378 \\ \pm 0.307 \end{matrix}$                   | $\begin{matrix} 0.393 \\ \pm 0.359 \end{matrix}$                   | $\begin{matrix} 0.296 \\ \pm 0.367 \end{matrix}$                   | $\begin{matrix} 0.335 \\ \pm 0.350 \end{matrix}$ | $\begin{matrix} 0.345 \\ \pm 0.391 \end{matrix}$                   | $\begin{matrix} \mathbf{0.396} \\ \pm \mathbf{0.395} \end{matrix}$ | $\begin{matrix} 0.445 \\ \pm 0.347 \end{matrix}$                   |
| subject.6 | MSE     | $\begin{matrix} 0.088 \\ \pm 0.093 \end{matrix}$  | $\begin{matrix} 0.162 \\ \pm 0.166 \end{matrix}$ | $\begin{matrix} 0.113 \\ \pm 0.102 \end{matrix}$ | $\begin{matrix} 0.096 \\ \pm 0.114 \end{matrix}$ | $\begin{matrix} 0.092 \\ \pm 0.109 \end{matrix}$                   | $\begin{matrix} 0.131 \\ \pm 0.144 \end{matrix}$  | $\begin{matrix} 0.098 \\ \pm 0.102 \end{matrix}$  | $\begin{matrix} 0.107 \\ \pm 0.113 \end{matrix}$  | $\begin{matrix} 0.085 \\ \pm 0.105 \end{matrix}$ | $\begin{matrix} 0.190 \\ \pm 0.190 \end{matrix}$ | $\begin{matrix} 0.091 \\ \pm 0.106 \end{matrix}$ | $\begin{matrix} 0.086 \\ \pm 0.100 \end{matrix}$ | $\begin{matrix} 0.073 \\ \pm 0.064 \end{matrix}$                   | $\begin{matrix} 0.079 \\ \pm 0.097 \end{matrix}$                   | $\begin{matrix} \mathbf{0.077} \\ \pm \mathbf{0.077} \end{matrix}$ | $\begin{matrix} 0.109 \\ \pm 0.137 \end{matrix}$                   | $\begin{matrix} 0.083 \\ \pm 0.086 \end{matrix}$ | $\begin{matrix} 0.084 \\ \pm 0.099 \end{matrix}$                   | $\begin{matrix} 0.086 \\ \pm 0.105 \end{matrix}$                   | $\begin{matrix} 0.078 \\ \pm 0.089 \end{matrix}$                   |
|           | Pearson | $\begin{matrix} -0.075 \\ \pm 0.205 \end{matrix}$ | $\begin{matrix} 0.216 \\ \pm 0.259 \end{matrix}$ | $\begin{matrix} 0.010 \\ \pm 0.214 \end{matrix}$ | $\begin{matrix} 0.081 \\ \pm 0.162 \end{matrix}$ | $\begin{matrix} 0.136 \\ \pm 0.313 \end{matrix}$                   | $\begin{matrix} -0.171 \\ \pm 0.244 \end{matrix}$ | $\begin{matrix} -0.018 \\ \pm 0.092 \end{matrix}$ | $\begin{matrix} 0.016 \\ \pm 0.074 \end{matrix}$  | $\begin{matrix} 0.153 \\ \pm 0.237 \end{matrix}$ | $\begin{matrix} 0.333 \\ \pm 0.228 \end{matrix}$ | $\begin{matrix} 0.058 \\ \pm 0.094 \end{matrix}$ | $\begin{matrix} 0.101 \\ \pm 0.188 \end{matrix}$ | $\begin{matrix} 0.205 \\ \pm 0.310 \end{matrix}$                   | $\begin{matrix} 0.132 \\ \pm 0.258 \end{matrix}$                   | $\begin{matrix} 0.216 \\ \pm 0.273 \end{matrix}$                   | $\begin{matrix} -0.116 \\ \pm 0.350 \end{matrix}$                  | $\begin{matrix} 0.157 \\ \pm 0.254 \end{matrix}$ | $\begin{matrix} 0.192 \\ \pm 0.281 \end{matrix}$                   | $\begin{matrix} 0.120 \\ \pm 0.301 \end{matrix}$                   | $\begin{matrix} \mathbf{0.238} \\ \pm \mathbf{0.318} \end{matrix}$ |
| subject.7 | MSE     | $\begin{matrix} 0.213 \\ \pm 0.232 \end{matrix}$  | $\begin{matrix} 0.124 \\ \pm 0.149 \end{matrix}$ | $\begin{matrix} 0.206 \\ \pm 0.255 \end{matrix}$ | $\begin{matrix} 0.090 \\ \pm 0.090 \end{matrix}$ | $\begin{matrix} 0.219 \\ \pm 0.238 \end{matrix}$                   | $\begin{matrix} 0.162 \\ \pm 0.152 \end{matrix}$  | $\begin{matrix} 0.092 \\ \pm 0.096 \end{matrix}$  | $\begin{matrix} 0.102 \\ \pm 0.087 \end{matrix}$  | $\begin{matrix} 0.133 \\ \pm 0.128 \end{matrix}$ | $\begin{matrix} 0.250 \\ \pm 0.244 \end{matrix}$ | $\begin{matrix} 0.086 \\ \pm 0.079 \end{matrix}$ | $\begin{matrix} 0.101 \\ \pm 0.087 \end{matrix}$ | $\begin{matrix} 0.120 \\ \pm 0.120 \end{matrix}$                   | $\begin{matrix} 0.085 \\ \pm 0.073 \end{matrix}$                   | $\begin{matrix} 0.138 \\ \pm 0.148 \end{matrix}$                   | $\begin{matrix} 0.078 \\ \pm 0.067 \end{matrix}$                   | $\begin{matrix} 0.144 \\ \pm 0.135 \end{matrix}$ | $\begin{matrix} \mathbf{0.080} \\ \pm \mathbf{0.064} \end{matrix}$ | $\begin{matrix} 0.115 \\ \pm 0.111 \end{matrix}$                   | $\begin{matrix} 0.081 \\ \pm 0.070 \end{matrix}$                   |
|           | Pearson | $\begin{matrix} -0.002 \\ \pm 0.174 \end{matrix}$ | $\begin{matrix} 0.231 \\ \pm 0.370 \end{matrix}$ | $\begin{matrix} 0.191 \\ \pm 0.300 \end{matrix}$ | $\begin{matrix} 0.275 \\ \pm 0.279 \end{matrix}$ | $\begin{matrix} 0.019 \\ \pm 0.397 \end{matrix}$                   | $\begin{matrix} 0.166 \\ \pm 0.240 \end{matrix}$  | $\begin{matrix} 0.012 \\ \pm 0.114 \end{matrix}$  | $\begin{matrix} -0.009 \\ \pm 0.098 \end{matrix}$ | $\begin{matrix} 0.223 \\ \pm 0.316 \end{matrix}$ | $\begin{matrix} 0.178 \\ \pm 0.257 \end{matrix}$ | $\begin{matrix} 0.182 \\ \pm 0.218 \end{matrix}$ | $\begin{matrix} 0.266 \\ \pm 0.256 \end{matrix}$ | $\begin{matrix} 0.286 \\ \pm 0.332 \end{matrix}$                   | $\begin{matrix} 0.230 \\ \pm 0.315 \end{matrix}$                   | $\begin{matrix} 0.275 \\ \pm 0.355 \end{matrix}$                   | $\begin{matrix} 0.306 \\ \pm 0.301 \end{matrix}$                   | $\begin{matrix} 0.229 \\ \pm 0.321 \end{matrix}$ | $\begin{matrix} 0.265 \\ \pm 0.324 \end{matrix}$                   | $\begin{matrix} 0.279 \\ \pm 0.288 \end{matrix}$                   | $\begin{matrix} \mathbf{0.287} \\ \pm \mathbf{0.326} \end{matrix}$ |
| subject.8 | MSE     | $\begin{matrix} 0.526 \\ \pm 0.269 \end{matrix}$  | $\begin{matrix} 0.203 \\ \pm 0.143 \end{matrix}$ | $\begin{matrix} 0.181 \\ \pm 0.184 \end{matrix}$ | $\begin{matrix} 0.197 \\ \pm 0.137 \end{matrix}$ | $\begin{matrix} 0.090 \\ \pm 0.069 \end{matrix}$                   | $\begin{matrix} 0.153 \\ \pm 0.126 \end{matrix}$  | $\begin{matrix} 0.113 \\ \pm 0.112 \end{matrix}$  | $\begin{matrix} 0.143 \\ \pm 0.140 \end{matrix}$  | $\begin{matrix} 0.115 \\ \pm 0.082 \end{matrix}$ | $\begin{matrix} 0.072 \\ \pm 0.071 \end{matrix}$ | $\begin{matrix} 0.114 \\ \pm 0.096 \end{matrix}$ | $\begin{matrix} 0.127 \\ \pm 0.092 \end{matrix}$ | $\begin{matrix} 0.089 \\ \pm 0.063 \end{matrix}$                   | $\begin{matrix} 0.092 \\ \pm 0.075 \end{matrix}$                   | $\begin{matrix} 0.089 \\ \pm 0.056 \end{matrix}$                   | $\begin{matrix} 0.104 \\ \pm 0.070 \end{matrix}$                   | $\begin{matrix} 0.092 \\ \pm 0.062 \end{matrix}$ | $\begin{matrix} 0.109 \\ \pm 0.078 \end{matrix}$                   | $\begin{matrix} 0.090 \\ \pm 0.063 \end{matrix}$                   | $\begin{matrix} \mathbf{0.084} \\ \pm \mathbf{0.060} \end{matrix}$ |
|           | Pearson | $\begin{matrix} 0.209 \\ \pm 0.321 \end{matrix}$  | $\begin{matrix} 0.295 \\ \pm 0.272 \end{matrix}$ | $\begin{matrix} 0.259 \\ \pm 0.284 \end{matrix}$ | $\begin{matrix} 0.229 \\ \pm 0.293 \end{matrix}$ | $\begin{matrix} 0.329 \\ \pm 0.280 \end{matrix}$                   | $\begin{matrix} -0.070 \\ \pm 0.280 \end{matrix}$ | $\begin{matrix} 0.059 \\ \pm 0.143 \end{matrix}$  | $\begin{matrix} 0.001 \\ \pm 0.114 \end{matrix}$  | $\begin{matrix} 0.308 \\ \pm 0.283 \end{matrix}$ | $\begin{matrix} 0.315 \\ \pm 0.316 \end{matrix}$ | $\begin{matrix} 0.358 \\ \pm 0.295 \end{matrix}$ | $\begin{matrix} 0.369 \\ \pm 0.313 \end{matrix}$ | $\begin{matrix} 0.381 \\ \pm 0.322 \end{matrix}$                   | $\begin{matrix} 0.320 \\ \pm 0.351 \end{matrix}$                   | $\begin{matrix} 0.361 \\ \pm 0.307 \end{matrix}$                   | $\begin{matrix} 0.319 \\ \pm 0.368 \end{matrix}$                   | $\begin{matrix} 0.366 \\ \pm 0.295 \end{matrix}$ | $\begin{matrix} 0.332 \\ \pm 0.350 \end{matrix}$                   | $\begin{matrix} \mathbf{0.374} \\ \pm \mathbf{0.315} \end{matrix}$ | $\begin{matrix} 0.373 \\ \pm 0.354 \end{matrix}$                   |
| subject.9 | MSE     | $\begin{matrix} 0.100 \\ \pm 0.099 \end{matrix}$  | $\begin{matrix} 0.139 \\ \pm 0.181 \end{matrix}$ | $\begin{matrix} 0.126 \\ \pm 0.121 \end{matrix}$ | $\begin{matrix} 0.088 \\ \pm 0.106 \end{matrix}$ | $\begin{matrix} \mathbf{0.077} \\ \pm \mathbf{0.084} \end{matrix}$ | $\begin{matrix} 0.092 \\ \pm 0.076 \end{matrix}$  | $\begin{matrix} 0.098 \\ \pm 0.090 \end{matrix}$  | $\begin{matrix} 0.106 \\ \pm 0.084 \end{matrix}$  | $\begin{matrix} 0.090 \\ \pm 0.110 \end{matrix}$ | $\begin{matrix} 0.222 \\ \pm 0.230 \end{matrix}$ | $\begin{matrix} 0.085 \\ \pm 0.092 \end{matrix}$ | $\begin{matrix} 0.090 \\ \pm 0.097 \end{matrix}$ | $\begin{matrix} 0.087 \\ \pm 0.099 \end{matrix}$                   | $\begin{matrix} 0.084 \\ \pm 0.096 \end{matrix}$                   | $\begin{matrix} 0.089 \\ \pm 0.101 \end{matrix}$                   | $\begin{matrix} 0.085 \\ \pm 0.096 \end{matrix}$                   | $\begin{matrix} 0.087 \\ \pm 0.100 \end{matrix}$ | $\begin{matrix} 0.077 \\ \pm 0.079 \end{matrix}$                   | $\begin{matrix} 0.091 \\ \pm 0.102 \end{matrix}$                   | $\begin{matrix} 0.088 \\ \pm 0.099 \end{matrix}$                   |
|           | Pearson | $\begin{matrix} 0.068 \\ \pm 0.370 \end{matrix}$  | $\begin{matrix} 0.100 \\ \pm 0.336 \end{matrix}$ | $\begin{matrix} 0.137 \\ \pm 0.308 \end{matrix}$ | $\begin{matrix} 0.154 \\ \pm 0.312 \end{matrix}$ | $\begin{matrix} 0.164 \\ \pm 0.304 \end{matrix}$                   | $\begin{matrix} 0.074 \\ \pm 0.229 \end{matrix}$  | $\begin{matrix} 0.000 \\ \pm 0.103 \end{matrix}$  | $\begin{matrix} 0.031 \\ \pm 0.109 \end{matrix}$  | $\begin{matrix} 0.130 \\ \pm 0.249 \end{matrix}$ | $\begin{matrix} 0.266 \\ \pm 0.253 \end{matrix}$ | $\begin{matrix} 0.148 \\ \pm 0.257 \end{matrix}$ | $\begin{matrix} 0.131 \\ \pm 0.274 \end{matrix}$ | $\begin{matrix} 0.160 \\ \pm 0.355 \end{matrix}$                   | $\begin{matrix} 0.215 \\ \pm 0.375 \end{matrix}$                   | $\begin{matrix} 0.133 \\ \pm 0.357 \end{matrix}$                   | $\begin{matrix} 0.198 \\ \pm 0.357 \end{matrix}$                   | $\begin{matrix} 0.153 \\ \pm 0.351 \end{matrix}$ | $\begin{matrix} \mathbf{0.236} \\ \pm \mathbf{0.325} \end{matrix}$ | $\begin{matrix} 0.106 \\ \pm 0.373 \end{matrix}$                   | $\begin{matrix} 0.183 \\ \pm 0.370 \end{matrix}$                   |

## H.3 LEAVE-ONE-OUT RESULTS

## H.3.1 LEAVE-ONE-OUT ZERO-SHOT EVALUATION

Table 93: Average Leave-One-Out Zero-Shot Performance Across All Subjects.

| Model (Training strategy) | MSE                         | Pearson                     |
|---------------------------|-----------------------------|-----------------------------|
| <b>DeepConvnet</b>        | 0.055<br>$\pm 0.035$        | 0.452<br>$\pm 0.352$        |
| <b>EEGNet</b>             | 0.095<br>$\pm 0.077$        | <b>0.471</b><br>$\pm 0.296$ |
| <b>Conformer</b>          | 0.056<br>$\pm 0.060$        | 0.398<br>$\pm 0.338$        |
| <b>CTNet</b>              | 0.065<br>$\pm 0.052$        | 0.435<br>$\pm 0.313$        |
| <b>BIOT (f)</b>           | 0.065<br>$\pm 0.060$        | 0.360<br>$\pm 0.342$        |
| <b>BIOT (l)</b>           | 0.056<br>$\pm 0.042$        | 0.440<br>$\pm 0.283$        |
| <b>BENDR (f)</b>          | 0.050<br>$\pm 0.037$        | 0.347<br>$\pm 0.330$        |
| <b>BENDR (l)</b>          | 0.104<br>$\pm 0.077$        | 0.037<br>$\pm 0.141$        |
| <b>CBraMod (f)</b>        | 0.062<br>$\pm 0.067$        | 0.408<br>$\pm 0.361$        |
| <b>CBraMod (l)</b>        | 2.951<br>$\pm 2.877$        | 0.232<br>$\pm 0.262$        |
| <b>EEGPT (f)</b>          | 0.051<br>$\pm 0.040$        | 0.413<br>$\pm 0.343$        |
| <b>EEGPT (l)</b>          | 0.063<br>$\pm 0.059$        | 0.443<br>$\pm 0.332$        |
| <b>LaBraM (f)</b>         | 0.057<br>$\pm 0.061$        | 0.421<br>$\pm 0.319$        |
| <b>LaBraM (l)</b>         | 0.061<br>$\pm 0.057$        | 0.418<br>$\pm 0.305$        |
| <b>STEEGformer-s (f)</b>  | 0.055<br>$\pm 0.061$        | 0.441<br>$\pm 0.370$        |
| <b>STEEGformer-s (l)</b>  | 0.064<br>$\pm 0.062$        | 0.372<br>$\pm 0.367$        |
| <b>STEEGformer-b (f)</b>  | 0.058<br>$\pm 0.055$        | 0.403<br>$\pm 0.374$        |
| <b>STEEGformer-b (l)</b>  | 0.057<br>$\pm 0.050$        | 0.379<br>$\pm 0.338$        |
| <b>STEEGformer-l (f)</b>  | <b>0.050</b><br>$\pm 0.053$ | 0.445<br>$\pm 0.367$        |
| <b>STEEGformer-l (l)</b>  | 0.048<br>$\pm 0.045$        | <b>0.454</b><br>$\pm 0.358$ |

Table 94: Per-Subject Leave-One-Out Zero-Shot Performance.

| Subject    | Metric  | DeepConvNet | EEGNet | Conformer    | CTNet        | BIOT (f) | BIOT (l)     | BENDR (f) | BENDR (l) | CBraMod (f)  | CBraMod (l) | EEGPT (f)    | EEGPT (l) | LaBraM (f)   | LaBraM (l) | STEEGformer-s (f) | STEEGformer-s (l) | STEEGformer-b (f) | STEEGformer-b (l) | STEEGformer-l (f) | STEEGformer-l (l) |
|------------|---------|-------------|--------|--------------|--------------|----------|--------------|-----------|-----------|--------------|-------------|--------------|-----------|--------------|------------|-------------------|-------------------|-------------------|-------------------|-------------------|-------------------|
| subject_1  | MSE     | 0.036       | 0.282  | 0.013        | 0.113        | 0.021    | 0.081        | 0.038     | 0.262     | 0.008        | 4.065       | 0.039        | 0.008     | 0.011        | 0.068      | 0.007             | 0.080             | <b>0.006</b>      | 0.039             | 0.004             | 0.009             |
|            | Pearson | 0.922       | 0.887  | 0.914        | 0.769        | 0.911    | 0.632        | 0.787     | 0.095     | 0.954        | -0.291      | 0.907        | 0.944     | 0.877        | 0.901      | 0.969             | 0.922             | 0.961             | 0.926             | <b>0.965</b>      | 0.948             |
| subject_10 | MSE     | 0.035       | 0.058  | 0.071        | <b>0.028</b> | 0.066    | 0.050        | 0.047     | 0.044     | 0.058        | 6.811       | 0.046        | 0.034     | 0.069        | 0.026      | 0.069             | 0.030             | 0.063             | 0.029             | 0.058             | 0.029             |
|            | Pearson | 0.300       | 0.355  | 0.432        | 0.394        | 0.322    | 0.394        | 0.285     | 0.025     | 0.317        | 0.391       | <b>0.430</b> | 0.397     | 0.379        | 0.150      | 0.350             | 0.122             | 0.359             | 0.189             | 0.421             | 0.224             |
| subject_11 | MSE     | 0.071       | 0.115  | 0.043        | 0.022        | 0.021    | 0.024        | 0.018     | 0.054     | <b>0.016</b> | 0.723       | 0.023        | 0.018     | 0.025        | 0.016      | 0.017             | 0.025             | 0.017             | 0.019             | 0.023             | 0.013             |
|            | Pearson | 0.232       | 0.262  | 0.401        | 0.281        | 0.320    | 0.364        | 0.358     | 0.136     | 0.327        | 0.248       | 0.219        | 0.472     | 0.252        | 0.395      | 0.623             | 0.313             | <b>0.571</b>      | 0.257             | 0.545             | 0.459             |
| subject_12 | MSE     | 0.066       | 0.123  | 0.054        | 0.066        | 0.098    | <b>0.052</b> | 0.047     | 0.145     | 0.098        | 12.937      | 0.087        | 0.141     | 0.108        | 0.072      | 0.063             | 0.093             | 0.131             | 0.083             | 0.135             | 0.067             |
|            | Pearson | 0.865       | 0.813  | 0.787        | 0.739        | 0.716    | 0.862        | 0.858     | 0.164     | 0.861        | 0.642       | 0.819        | 0.766     | <b>0.886</b> | 0.790      | 0.881             | 0.819             | 0.703             | 0.845             | 0.755             | 0.901             |
| subject_13 | MSE     | 0.078       | 0.188  | 0.011        | 0.088        | 0.019    | 0.044        | 0.082     | 0.230     | 0.063        | 3.250       | 0.052        | 0.065     | 0.024        | 0.068      | 0.025             | 0.104             | <b>0.012</b>      | 0.049             | 0.013             | 0.058             |
|            | Pearson | 0.898       | 0.840  | 0.917        | 0.841        | 0.941    | 0.790        | 0.673     | 0.196     | 0.859        | 0.074       | 0.905        | 0.912     | 0.935        | 0.819      | 0.937             | 0.788             | <b>0.948</b>      | 0.869             | 0.949             | 0.916             |
| subject_14 | MSE     | 0.037       | 0.038  | 0.031        | 0.026        | 0.026    | 0.026        | 0.027     | 0.049     | 0.023        | 0.748       | 0.020        | 0.023     | 0.025        | 0.015      | 0.022             | 0.024             | 0.028             | 0.018             | 0.026             | <b>0.015</b>      |
|            | Pearson | 0.723       | 0.617  | 0.505        | 0.623        | 0.698    | 0.710        | 0.653     | 0.269     | 0.599        | 0.514       | 0.661        | 0.678     | 0.553        | 0.747      | 0.642             | 0.679             | 0.466             | 0.716             | 0.629             | <b>0.740</b>      |
| subject_15 | MSE     | 0.013       | 0.005  | 0.029        | 0.055        | 0.075    | 0.071        | 0.017     | 0.044     | 0.061        | 1.107       | 0.047        | 0.095     | 0.019        | 0.025      | 0.069             | <b>0.013</b>      | 0.080             | 0.030             | 0.076             | 0.041             |
|            | Pearson | 0.102       | 0.182  | <b>0.191</b> | -0.116       | 0.052    | 0.021        | -0.101    | -0.156    | -0.011       | 0.283       | 0.077        | 0.132     | 0.102        | -0.015     | -0.026            | -0.078            | 0.010             | -0.060            | 0.027             | 0.095             |
| subject_16 | MSE     | 0.053       | 0.206  | <b>0.008</b> | 0.059        | 0.028    | 0.067        | 0.077     | 0.248     | 0.012        | 2.835       | 0.116        | 0.074     | 0.073        | 0.147      | 0.038             | 0.166             | 0.043             | 0.130             | 0.008             | 0.057             |
|            | Pearson | 0.951       | 0.895  | 0.973        | 0.864        | 0.878    | 0.714        | 0.611     | -0.137    | 0.963        | 0.605       | 0.750        | 0.831     | 0.720        | 0.523      | 0.873             | 0.603             | 0.848             | 0.713             | <b>0.972</b>      | 0.876             |
| subject_17 | MSE     | 0.049       | 0.072  | 0.006        | 0.011        | 0.015    | 0.028        | 0.021     | 0.034     | 0.007        | 3.757       | 0.005        | 0.014     | 0.003        | 0.007      | <b>0.004</b>      | 0.007             | 0.012             | 0.009             | 0.012             | 0.009             |
|            | Pearson | 0.233       | 0.255  | 0.180        | 0.338        | 0.076    | 0.280        | -0.027    | 0.021     | 0.214        | 0.197       | 0.338        | 0.448     | 0.149        | 0.222      | -0.019            | <b>0.414</b>      | 0.314             | 0.298             | 0.142             | 0.385             |
| subject_18 | MSE     | 0.014       | 0.050  | 0.009        | 0.018        | 0.011    | 0.007        | 0.023     | 0.053     | 0.023        | 5.696       | <b>0.008</b> | 0.010     | 0.018        | 0.020      | 0.013             | 0.015             | 0.013             | 0.009             | 0.008             | 0.010             |
|            | Pearson | 0.343       | 0.161  | <b>0.241</b> | 0.051        | -0.064   | 0.141        | 0.027     | -0.019    | -0.047       | 0.239       | 0.069        | 0.213     | 0.149        | 0.073      | -0.056            | -0.164            | -0.036            | -0.004            | -0.055            | -0.115            |
| subject_19 | MSE     | 0.024       | 0.053  | 0.017        | 0.018        | 0.041    | 0.023        | 0.019     | 0.025     | 0.021        | 2.203       | 0.038        | 0.024     | 0.024        | 0.028      | 0.016             | 0.013             | 0.033             | <b>0.015</b>      | 0.021             | 0.023             |

Continued on next page

| Subject    | Metric  | DeepConvnet | EEGNet | Conformer | CTNet  | BIOT (f) | BIOT (l) | BENDR (f) | BENDR (l) | CBraMod (f) | CBraMod (l) | EEGPT (f) | EEGPT (l) | LaBraM (f) | LaBraM (l) | STEEGformer-s (j) | STEEGformer-s (l) | STEEGformer-b (j) | STEEGformer-b (l) | STEEGformer-l (j) | STEEGformer-l (l) |
|------------|---------|-------------|--------|-----------|--------|----------|----------|-----------|-----------|-------------|-------------|-----------|-----------|------------|------------|-------------------|-------------------|-------------------|-------------------|-------------------|-------------------|
| subject.2  | Pearson | 0.369       | 0.474  | 0.409     | 0.449  | 0.155    | 0.430    | 0.453     | 0.145     | 0.208       | 0.232       | 0.207     | 0.194     | 0.190      | 0.386      | 0.393             | 0.401             | 0.188             | 0.414             | 0.456             | 0.436             |
|            | MSE     | 0.009       | 0.105  | 0.039     | 0.067  | 0.062    | 0.029    | 0.015     | 0.092     | 0.030       | 1.523       | 0.010     | 0.045     | 0.005      | 0.022      | 0.021             | 0.009             | 0.040             | 0.022             | 0.010             | 0.038             |
|            | Pearson | -0.311      | 0.101  | -0.051    | 0.047  | -0.214   | 0.066    | 0.214     | -0.151    | 0.074       | 0.204       | -0.210    | -0.108    | 0.264      | 0.210      | 0.221             | 0.064             | -0.024            | -0.138            | 0.302             | -0.105            |
| subject.20 | MSE     | 0.091       | 0.037  | 0.147     | 0.186  | 0.217    | 0.177    | 0.134     | 0.199     | 0.268       | 0.071       | 0.162     | 0.238     | 0.200      | 0.222      | 0.174             | 0.249             | 0.128             | 0.189             | 0.126             | 0.182             |
|            | Pearson | -0.096      | 0.060  | -0.060    | -0.002 | -0.107   | -0.059   | 0.019     | -0.036    | 0.011       | 0.183       | 0.100     | -0.003    | 0.096      | 0.105      | 0.104             | 0.034             | -0.180            | 0.039             | -0.187            | 0.070             |
| subject.21 | MSE     | 0.119       | 0.049  | 0.121     | 0.173  | 0.159    | 0.122    | 0.134     | 0.159     | 0.187       | 0.394       | 0.092     | 0.123     | 0.141      | 0.161      | 0.172             | 0.140             | 0.145             | 0.130             | 0.145             | 0.128             |
|            | Pearson | 0.373       | 0.422  | 0.256     | 0.582  | 0.209    | 0.404    | 0.515     | 0.264     | 0.471       | 0.077       | 0.590     | 0.485     | 0.274      | 0.672      | 0.169             | 0.651             | 0.344             | 0.639             | 0.355             | 0.652             |
| subject.3  | MSE     | 0.130       | 0.228  | 0.065     | 0.132  | 0.041    | 0.041    | 0.041     | 0.026     | 0.028       | 4.337       | 0.049     | 0.142     | 0.026      | 0.031      | 0.023             | 0.048             | 0.045             | 0.058             | 0.033             | 0.024             |
|            | Pearson | 0.475       | 0.491  | 0.222     | 0.457  | 0.325    | 0.348    | 0.134     | 0.046     | 0.159       | -0.050      | 0.120     | 0.337     | 0.114      | 0.231      | -0.319            | 0.372             | -0.209            | 0.254             | 0.388             | 0.345             |
| subject.4  | MSE     | 0.033       | 0.010  | 0.267     | 0.127  | 0.182    | 0.120    | 0.076     | 0.092     | 0.172       | 2.989       | 0.034     | 0.019     | 0.217      | 0.097      | 0.227             | 0.083             | 0.223             | 0.086             | 0.190             | 0.116             |
|            | Pearson | 0.582       | 0.554  | 0.481     | 0.641  | 0.483    | 0.628    | 0.320     | 0.060     | 0.551       | -0.345      | 0.396     | 0.508     | 0.516      | 0.412      | 0.521             | 0.292             | 0.400             | 0.308             | 0.449             | 0.546             |
| subject.5  | MSE     | 0.109       | 0.194  | 0.097     | 0.077  | 0.147    | 0.066    | 0.083     | 0.158     | 0.074       | 3.875       | 0.085     | 0.064     | 0.060      | 0.105      | 0.078             | 0.124             | 0.078             | 0.136             | 0.068             | 0.081             |
|            | Pearson | 0.859       | 0.784  | 0.648     | 0.819  | 0.341    | 0.846    | 0.749     | 0.260     | 0.834       | 0.714       | 0.791     | 0.885     | 0.859      | 0.822      | 0.820             | 0.735             | 0.828             | 0.537             | 0.848             | 0.854             |
| subject.6  | MSE     | 0.030       | 0.071  | 0.055     | 0.023  | 0.029    | 0.032    | 0.031     | 0.052     | 0.019       | 0.527       | 0.019     | 0.028     | 0.023      | 0.021      | 0.024             | 0.027             | 0.014             | 0.028             | 0.023             | 0.025             |
|            | Pearson | 0.428       | 0.713  | 0.235     | 0.304  | 0.205    | 0.400    | 0.197     | -0.153    | 0.424       | 0.224       | 0.501     | 0.054     | 0.450      | 0.324      | 0.506             | 0.055             | 0.685             | 0.233             | 0.436             | 0.309             |
| subject.7  | MSE     | 0.082       | 0.054  | 0.016     | 0.007  | 0.012    | 0.012    | 0.021     | 0.028     | 0.021       | 1.491       | 0.017     | 0.023     | 0.022      | 0.018      | 0.007             | 0.033             | 0.022             | 0.029             | 0.006             | 0.009             |
|            | Pearson | 0.043       | 0.105  | -0.042    | 0.076  | 0.316    | 0.290    | -0.177    | -0.126    | -0.035      | 0.275       | 0.130     | 0.266     | 0.336      | -0.086     | 0.341             | -0.427            | -0.017            | -0.077            | -0.259            | 0.143             |
| subject.8  | MSE     | 0.056       | 0.034  | 0.061     | 0.058  | 0.075    | 0.100    | 0.093     | 0.150     | 0.088       | 0.126       | 0.097     | 0.127     | 0.094      | 0.095      | 0.075             | 0.063             | 0.067             | 0.075             | 0.055             | 0.070             |
|            | Pearson | 0.872       | 0.859  | 0.856     | 0.862  | 0.861    | 0.855    | 0.844     | -0.026    | 0.909       | 0.378       | 0.926     | 0.907     | 0.892      | 0.853      | 0.929             | 0.894             | 0.922             | 0.870             | 0.946             | 0.911             |
| subject.9  | MSE     | 0.014       | 0.024  | 0.021     | 0.011  | 0.015    | 0.013    | 0.014     | 0.039     | 0.022       | 2.497       | 0.021     | 0.019     | 0.011      | 0.019      | 0.008             | 0.005             | 0.008             | 0.009             | 0.017             | 0.009             |
|            | Pearson | 0.326       | 0.059  | -0.146    | 0.111  | 0.147    | 0.127    | -0.105    | -0.095    | -0.067      | 0.068       | -0.064    | -0.009    | -0.158     | 0.252      | 0.408             | 0.317             | 0.375             | 0.137             | 0.258             | -0.051            |

11535  
11536  
11537  
11538  
11539  
11540  
11541  
11542  
11543  
11544  
11545  
11546  
11547  
11548  
11549  
11550  
11551  
11552  
11553  
11554  
11555  
11556  
11557  
11558  
11559  
11560  
11561  
11562  
11563  
11564  
11565  
11566  
11567

## H.3.2 LEAVE-ONE-OUT FINE-TUNING RESULTS

Table 95: Average Leave-One-Out Fine-Tuned Performance Across All Subjects.

| Model (Training strategy) | MSE                         | Pearson                     |
|---------------------------|-----------------------------|-----------------------------|
| <b>DeepConvnet</b>        | 0.086<br>$\pm 0.058$        | 0.472<br>$\pm 0.246$        |
| <b>EEGNet</b>             | 0.102<br>$\pm 0.063$        | 0.412<br>$\pm 0.198$        |
| <b>Conformer</b>          | 0.081<br>$\pm 0.067$        | 0.527<br>$\pm 0.218$        |
| <b>CTNet</b>              | 0.102<br>$\pm 0.064$        | 0.333<br>$\pm 0.250$        |
| <b>BIOT (f)</b>           | 0.074<br>$\pm 0.056$        | 0.526<br>$\pm 0.222$        |
| <b>BIOT (l)</b>           | 0.078<br>$\pm 0.059$        | 0.538<br>$\pm 0.291$        |
| <b>BENDR (f)</b>          | 0.075<br>$\pm 0.063$        | 0.513<br>$\pm 0.212$        |
| <b>BENDR (l)</b>          | 0.144<br>$\pm 0.055$        | 0.032<br>$\pm 0.089$        |
| <b>CBraMod (f)</b>        | <b>0.057</b><br>$\pm 0.036$ | 0.654<br>$\pm 0.167$        |
| <b>CBraMod (l)</b>        | 2.222<br>$\pm 5.281$        | 0.097<br>$\pm 0.329$        |
| <b>EEGPT (f)</b>          | 0.060<br>$\pm 0.050$        | 0.606<br>$\pm 0.269$        |
| <b>EEGPT (l)</b>          | 0.082<br>$\pm 0.060$        | 0.490<br>$\pm 0.251$        |
| <b>LaBraM (f)</b>         | <b>0.044</b><br>$\pm 0.042$ | <b>0.747</b><br>$\pm 0.163$ |
| <b>LaBraM (l)</b>         | 0.082<br>$\pm 0.048$        | 0.455<br>$\pm 0.212$        |
| <b>STEEGformer-s (f)</b>  | 0.057<br>$\pm 0.064$        | <b>0.727</b><br>$\pm 0.155$ |
| <b>STEEGformer-s (l)</b>  | 0.089<br>$\pm 0.047$        | 0.393<br>$\pm 0.236$        |
| <b>STEEGformer-b (f)</b>  | 0.057<br>$\pm 0.047$        | 0.708<br>$\pm 0.170$        |
| <b>STEEGformer-b (l)</b>  | 0.083<br>$\pm 0.055$        | 0.474<br>$\pm 0.236$        |
| <b>STEEGformer-l (f)</b>  | 0.058<br>$\pm 0.040$        | 0.621<br>$\pm 0.229$        |
| <b>STEEGformer-l (l)</b>  | 0.075<br>$\pm 0.058$        | 0.536<br>$\pm 0.242$        |



Table 96: Per-Subject Leave-One-Out Fine-Tuned Performance.

| Subject                | Metric  | DeepConvnet | EEGNet | Conformer | CTNet  | BIOT (f) | BIOT (l) | BENDR (f) | BENDR (l) | CBraMod (f) | CBraMod (l) | EEGPT (f) | EEGPT (l) | LaBraM (f) | LaBraM (l) | STEEGformer-s (f) | STEEGformer-s (l) | STEEGformer-b (f) | STEEGformer-b (l) | STEEGformer-l (f) | STEEGformer-l (l) |
|------------------------|---------|-------------|--------|-----------|--------|----------|----------|-----------|-----------|-------------|-------------|-----------|-----------|------------|------------|-------------------|-------------------|-------------------|-------------------|-------------------|-------------------|
| subject_1              | MSE     | 0.036       | 0.028  | 0.034     | 0.081  | 0.040    | 0.033    | 0.051     | 0.162     | 0.064       | 1.465       | 0.024     | 0.059     | 0.008      | 0.094      | 0.019             | 0.123             | 0.062             | 0.062             | 0.065             | 0.065             |
|                        | Pearson | 0.422       | 0.485  | 0.358     | 0.167  | 0.376    | 0.221    | 0.108     | 0.057     | 0.617       | -0.254      | 0.488     | 0.026     | 0.758      | 0.221      | 0.574             | 0.087             | 0.631             | 0.319             | 0.609             | 0.346             |
| subject_10             | MSE     | 0.021       | 0.019  | 0.024     | 0.026  | 0.022    | 0.038    | 0.028     | 0.082     | 0.042       | 1.506       | 0.029     | 0.040     | 0.013      | 0.063      | 0.014             | 0.037             | 0.006             | 0.028             | 0.027             | 0.037             |
|                        | Pearson | 0.524       | 0.266  | 0.423     | 0.545  | 0.379    | 0.146    | 0.285     | 0.090     | 0.898       | 0.458       | 0.378     | 0.319     | 0.666      | 0.152      | 0.622             | 0.085             | 0.811             | 0.218             | 0.476             | 0.519             |
| subject_11             | MSE     | 0.051       | 0.090  | 0.040     | 0.084  | 0.060    | 0.042    | 0.049     | 0.121     | 0.044       | 4.835       | 0.042     | 0.047     | 0.043      | 0.048      | 0.027             | 0.057             | 0.042             | 0.056             | 0.035             | 0.057             |
|                        | Pearson | 0.425       | 0.255  | 0.596     | 0.099  | 0.264    | 0.662    | 0.506     | -0.187    | 0.404       | 0.419       | 0.580     | 0.480     | 0.572      | 0.512      | 0.818             | 0.263             | 0.567             | 0.302             | 0.600             | 0.285             |
| subject_12             | MSE     | 0.089       | 0.105  | 0.082     | 0.106  | 0.050    | 0.044    | 0.040     | 0.152     | 0.074       | 1.303       | 0.019     | 0.060     | 0.076      | 0.035      | 0.074             | 0.039             | 0.080             | 0.047             | 0.060             | 0.041             |
|                        | Pearson | 0.885       | 0.691  | 0.618     | 0.448  | 0.758    | 0.848    | 0.812     | 0.102     | 0.704       | -0.382      | 0.922     | 0.729     | 0.561      | 0.841      | 0.669             | 0.843             | 0.588             | 0.852             | 0.708             | 0.810             |
| subject_13             | MSE     | 0.187       | 0.168  | 0.333     | 0.356  | 0.297    | 0.241    | 0.319     | 0.330     | 0.200       | 0.127       | 0.212     | 0.277     | 0.179      | 0.253      | 0.294             | 0.213             | 0.210             | 0.273             | 0.214             | 0.299             |
|                        | Pearson | -0.124      | 0.080  | 0.175     | -0.353 | 0.271    | 0.546    | 0.351     | 0.024     | 0.450       | 0.253       | 0.559     | 0.350     | 0.487      | 0.320      | 0.544             | 0.396             | 0.492             | 0.136             | 0.403             | 0.033             |
| subject_14             | MSE     | 0.080       | 0.087  | 0.041     | 0.090  | 0.043    | 0.042    | 0.051     | 0.121     | 0.072       | 0.350       | 0.059     | 0.076     | 0.018      | 0.048      | 0.024             | 0.041             | 0.017             | 0.067             | 0.017             | 0.035             |
|                        | Pearson | 0.676       | 0.576  | 0.740     | 0.579  | 0.723    | 0.742    | 0.637     | 0.079     | 0.638       | -0.029      | 0.576     | 0.513     | 0.896      | 0.664      | 0.859             | 0.724             | 0.894             | 0.656             | 0.892             | 0.799             |
| subject_15             | MSE     | 0.042       | 0.052  | 0.046     | 0.070  | 0.072    | 0.028    | 0.042     | 0.081     | 0.043       | 25.191      | 0.052     | 0.051     | 0.036      | 0.065      | 0.024             | 0.044             | 0.046             | 0.052             | 0.068             | 0.047             |
|                        | Pearson | 0.099       | -0.107 | 0.077     | -0.069 | -0.096   | 0.456    | 0.166     | -0.124    | 0.639       | 0.503       | -0.235    | -0.130    | 0.426      | -0.092     | 0.622             | -0.027            | 0.603             | -0.078            | 0.336             | 0.013             |
| subject_16             | MSE     | 0.057       | 0.060  | 0.068     | 0.072  | 0.028    | 0.034    | 0.023     | 0.111     | 0.034       | 0.146       | 0.032     | 0.037     | 0.016      | 0.049      | 0.028             | 0.050             | 0.030             | 0.040             | 0.017             | 0.029             |
|                        | Pearson | 0.649       | 0.574  | 0.616     | 0.575  | 0.805    | 0.791    | 0.828     | 0.180     | 0.810       | 0.092       | 0.803     | 0.714     | 0.884      | 0.650      | 0.781             | 0.682             | 0.794             | 0.745             | 0.871             | 0.834             |
| subject_17             | MSE     | 0.043       | 0.054  | 0.086     | 0.072  | 0.091    | 0.076    | 0.117     | 0.195     | 0.033       | 0.369       | 0.074     | 0.075     | 0.069      | 0.128      | 0.132             | 0.163             | 0.042             | 0.150             | 0.044             | 0.142             |
|                        | Pearson | 0.626       | 0.574  | 0.622     | 0.616  | 0.531    | 0.601    | 0.584     | -0.043    | 0.600       | 0.193       | 0.754     | 0.703     | 0.759      | 0.509      | 0.647             | 0.454             | 0.777             | 0.457             | 0.642             | 0.485             |
| subject_18             | MSE     | 0.047       | 0.080  | 0.054     | 0.106  | 0.108    | 0.046    | 0.054     | 0.136     | 0.066       | 0.841       | 0.030     | 0.051     | 0.020      | 0.083      | 0.031             | 0.087             | 0.016             | 0.087             | 0.037             | 0.064             |
|                        | Pearson | 0.686       | 0.403  | 0.689     | 0.319  | 0.647    | 0.787    | 0.652     | 0.113     | 0.629       | -0.379      | 0.834     | 0.702     | 0.881      | 0.559      | 0.906             | 0.492             | 0.932             | 0.555             | 0.784             | 0.677             |
| subject_19             | MSE     | 0.065       | 0.080  | 0.084     | 0.067  | 0.062    | 0.054    | 0.067     | 0.100     | 0.022       | 0.087       | 0.048     | 0.053     | 0.029      | 0.060      | 0.077             | 0.063             | 0.056             | 0.060             | 0.028             | 0.070             |
| Continued on next page |         |             |        |           |        |          |          |           |           |             |             |           |           |            |            |                   |                   |                   |                   |                   |                   |

|            |         | 11655       |        |           |       |          |          |           |           |             |             |           |           |            |            |                   |                   |                   |                   |                   |                   |
|------------|---------|-------------|--------|-----------|-------|----------|----------|-----------|-----------|-------------|-------------|-----------|-----------|------------|------------|-------------------|-------------------|-------------------|-------------------|-------------------|-------------------|
|            |         | 11656       |        |           |       |          |          |           |           |             |             |           |           |            |            |                   |                   |                   |                   |                   |                   |
|            |         | 11657       |        |           |       |          |          |           |           |             |             |           |           |            |            |                   |                   |                   |                   |                   |                   |
|            |         | 11658       |        |           |       |          |          |           |           |             |             |           |           |            |            |                   |                   |                   |                   |                   |                   |
|            |         | 11659       |        |           |       |          |          |           |           |             |             |           |           |            |            |                   |                   |                   |                   |                   |                   |
|            |         | 11660       |        |           |       |          |          |           |           |             |             |           |           |            |            |                   |                   |                   |                   |                   |                   |
|            |         | 11661       |        |           |       |          |          |           |           |             |             |           |           |            |            |                   |                   |                   |                   |                   |                   |
|            |         | 11662       |        |           |       |          |          |           |           |             |             |           |           |            |            |                   |                   |                   |                   |                   |                   |
|            |         | 11663       |        |           |       |          |          |           |           |             |             |           |           |            |            |                   |                   |                   |                   |                   |                   |
|            |         | 11664       |        |           |       |          |          |           |           |             |             |           |           |            |            |                   |                   |                   |                   |                   |                   |
|            |         | 11665       |        |           |       |          |          |           |           |             |             |           |           |            |            |                   |                   |                   |                   |                   |                   |
|            |         | 11666       |        |           |       |          |          |           |           |             |             |           |           |            |            |                   |                   |                   |                   |                   |                   |
|            |         | 11667       |        |           |       |          |          |           |           |             |             |           |           |            |            |                   |                   |                   |                   |                   |                   |
|            |         | 11668       |        |           |       |          |          |           |           |             |             |           |           |            |            |                   |                   |                   |                   |                   |                   |
|            |         | 11669       |        |           |       |          |          |           |           |             |             |           |           |            |            |                   |                   |                   |                   |                   |                   |
|            |         | 11670       |        |           |       |          |          |           |           |             |             |           |           |            |            |                   |                   |                   |                   |                   |                   |
|            |         | 11671       |        |           |       |          |          |           |           |             |             |           |           |            |            |                   |                   |                   |                   |                   |                   |
|            |         | 11672       |        |           |       |          |          |           |           |             |             |           |           |            |            |                   |                   |                   |                   |                   |                   |
|            |         | 11673       |        |           |       |          |          |           |           |             |             |           |           |            |            |                   |                   |                   |                   |                   |                   |
|            |         | 11674       |        |           |       |          |          |           |           |             |             |           |           |            |            |                   |                   |                   |                   |                   |                   |
|            |         | 11675       |        |           |       |          |          |           |           |             |             |           |           |            |            |                   |                   |                   |                   |                   |                   |
|            |         | 11676       |        |           |       |          |          |           |           |             |             |           |           |            |            |                   |                   |                   |                   |                   |                   |
|            |         | 11677       |        |           |       |          |          |           |           |             |             |           |           |            |            |                   |                   |                   |                   |                   |                   |
|            |         | 11678       |        |           |       |          |          |           |           |             |             |           |           |            |            |                   |                   |                   |                   |                   |                   |
|            |         | 11679       |        |           |       |          |          |           |           |             |             |           |           |            |            |                   |                   |                   |                   |                   |                   |
|            |         | 11680       |        |           |       |          |          |           |           |             |             |           |           |            |            |                   |                   |                   |                   |                   |                   |
|            |         | 11681       |        |           |       |          |          |           |           |             |             |           |           |            |            |                   |                   |                   |                   |                   |                   |
|            |         | 11682       |        |           |       |          |          |           |           |             |             |           |           |            |            |                   |                   |                   |                   |                   |                   |
|            |         | 11683       |        |           |       |          |          |           |           |             |             |           |           |            |            |                   |                   |                   |                   |                   |                   |
|            |         | 11684       |        |           |       |          |          |           |           |             |             |           |           |            |            |                   |                   |                   |                   |                   |                   |
|            |         | 11685       |        |           |       |          |          |           |           |             |             |           |           |            |            |                   |                   |                   |                   |                   |                   |
|            |         | 11686       |        |           |       |          |          |           |           |             |             |           |           |            |            |                   |                   |                   |                   |                   |                   |
|            |         | 11687       |        |           |       |          |          |           |           |             |             |           |           |            |            |                   |                   |                   |                   |                   |                   |
| Subject    | Metric  | DeepConvNet | EEGNet | Conformer | CTNet | BIOT (f) | BIOT (l) | BENDR (f) | BENDR (l) | CBraMod (f) | CBraMod (l) | EEGPT (f) | EEGPT (l) | LaBraM (f) | LaBraM (l) | STEEGformer-s (f) | STEEGformer-s (l) | STEEGformer-b (f) | STEEGformer-b (l) | STEEGformer-l (f) | STEEGformer-l (l) |
| subject_2  | Pearson | 0.383       | 0.285  | 0.467     | 0.348 | 0.689    | 0.585    | 0.447     | 0.072     | 0.695       | 0.372       | 0.681     | 0.638     | 0.873      | 0.483      | 0.476             | 0.430             | 0.683             | 0.562             | 0.693             | 0.570             |
|            | MSE     | 0.245       | 0.208  | 0.078     | 0.080 | 0.055    | 0.099    | 0.120     | 0.223     | 0.049       | 1.235       | 0.037     | 0.038     | 0.021      | 0.068      | 0.024             | 0.098             | 0.040             | 0.053             | 0.053             | 0.082             |
|            | Pearson | 0.739       | 0.638  | 0.696     | 0.613 | 0.804    | 0.507    | 0.501     | 0.038     | 0.805       | 0.414       | 0.831     | 0.790     | 0.848      | 0.676      | 0.857             | 0.567             | 0.883             | 0.676             | 0.802             | 0.777             |
| subject_20 | MSE     | 0.143       | 0.131  | 0.059     | 0.100 | 0.089    | 0.236    | 0.040     | 0.150     | 0.019       | 4.153       | 0.056     | 0.087     | 0.024      | 0.084      | 0.021             | 0.102             | 0.021             | 0.058             | 0.035             | 0.039             |
|            | Pearson | 0.024       | 0.484  | 0.736     | 0.102 | 0.388    | -0.387   | 0.765     | 0.122     | 0.531       | 0.386       | 0.592     | 0.399     | 0.856      | 0.309      | 0.917             | 0.253             | 0.902             | 0.635             | 0.581             | 0.800             |
| subject_21 | MSE     | 0.074       | 0.220  | 0.043     | 0.129 | 0.085    | 0.058    | 0.046     | 0.157     | 0.078       | 0.448       | 0.032     | 0.098     | 0.031      | 0.065      | 0.035             | 0.084             | 0.082             | 0.087             | 0.081             | 0.051             |
|            | Pearson | 0.837       | 0.723  | 0.834     | 0.630 | 0.673    | 0.844    | 0.716     | -0.103    | 0.836       | 0.373       | 0.824     | 0.637     | 0.913      | 0.719      | 0.857             | 0.711             | 0.836             | 0.854             | 0.825             | 0.803             |
| subject_3  | MSE     | 0.081       | 0.073  | 0.107     | 0.146 | 0.060    | 0.097    | 0.055     | 0.160     | 0.066       | 0.138       | 0.056     | 0.083     | 0.030      | 0.114      | 0.042             | 0.086             | 0.106             | 0.088             | 0.075             | 0.073             |
|            | Pearson | 0.514       | 0.486  | 0.342     | 0.399 | 0.774    | 0.845    | 0.784     | -0.032    | 0.637       | -0.161      | 0.849     | 0.743     | 0.944      | 0.497      | 0.836             | 0.513             | 0.326             | 0.692             | 0.549             | 0.673             |
| subject_4  | MSE     | 0.085       | 0.086  | 0.061     | 0.070 | 0.056    | 0.071    | 0.054     | 0.154     | 0.033       | 0.719       | 0.055     | 0.074     | 0.041      | 0.075      | 0.044             | 0.103             | 0.050             | 0.082             | 0.046             | 0.071             |
|            | Pearson | 0.476       | 0.407  | 0.648     | 0.432 | 0.668    | 0.641    | 0.649     | 0.038     | 0.331       | 0.151       | 0.718     | 0.610     | 0.772      | 0.496      | 0.754             | 0.444             | 0.690             | 0.472             | 0.188             | 0.627             |
| subject_5  | MSE     | 0.088       | 0.074  | 0.155     | 0.136 | 0.075    | 0.082    | 0.093     | 0.118     | 0.034       | 1.678       | 0.110     | 0.150     | 0.061      | 0.112      | 0.141             | 0.114             | 0.118             | 0.107             | 0.033             | 0.098             |
|            | Pearson | 0.371       | 0.293  | 0.134     | 0.085 | 0.470    | 0.242    | 0.255     | -0.012    | 0.759       | 0.032       | 0.492     | 0.350     | 0.607      | 0.215      | 0.345             | -0.028            | 0.399             | 0.234             | 0.790             | 0.344             |
| subject_6  | MSE     | 0.091       | 0.153  | 0.083     | 0.131 | 0.090    | 0.058    | 0.099     | 0.133     | 0.056       | 0.489       | 0.043     | 0.055     | 0.034      | 0.063      | 0.026             | 0.110             | 0.036             | 0.098             | 0.070             | 0.061             |
|            | Pearson | 0.470       | 0.439  | 0.769     | 0.246 | 0.313    | 0.795    | 0.592     | 0.033     | 0.711       | -0.646      | 0.837     | 0.781     | 0.937      | 0.585      | 0.931             | 0.375             | 0.909             | 0.416             | 0.713             | 0.678             |
| subject_7  | MSE     | 0.048       | 0.098  | 0.038     | 0.082 | 0.038    | 0.088    | 0.065     | 0.112     | 0.057       | 1.293       | 0.038     | 0.084     | 0.023      | 0.053      | 0.027             | 0.062             | 0.021             | 0.059             | 0.072             | 0.056             |
|            | Pearson | 0.510       | 0.444  | 0.763     | 0.310 | 0.621    | 0.399    | 0.503     | 0.064     | 0.851       | -0.265      | 0.621     | 0.250     | 0.824      | 0.431      | 0.840             | 0.254             | 0.818             | 0.418             | 0.738             | 0.392             |
| subject_8  | MSE     | 0.198       | 0.252  | 0.154     | 0.105 | 0.117    | 0.143    | 0.138     | 0.156     | 0.065       | 0.098       | 0.188     | 0.211     | 0.139      | 0.142      | 0.087             | 0.164             | 0.113             | 0.173             | 0.066             | 0.136             |
|            | Pearson | 0.300       | 0.201  | 0.374     | 0.498 | 0.486    | 0.483    | 0.300     | 0.012     | 0.872       | 0.481       | 0.074     | 0.177     | 0.444      | 0.336      | 0.641             | 0.311             | 0.563             | 0.281             | 0.851             | 0.321             |
| subject_9  | MSE     | 0.027       | 0.024  | 0.025     | 0.029 | 0.021    | 0.031    | 0.026     | 0.068     | 0.054       | 0.190       | 0.021     | 0.022     | 0.011      | 0.023      | 0.013             | 0.025             | 0.013             | 0.020             | 0.069             | 0.022             |
|            | Pearson | 0.413       | 0.446  | 0.393     | 0.398 | 0.508    | 0.544    | 0.337     | 0.151     | 0.323       | 0.028       | 0.548     | 0.518     | 0.784      | 0.467      | 0.774             | 0.427             | 0.765             | 0.542             | -0.011            | 0.481             |

11655  
11656  
11657  
11658  
11659  
11660  
11661  
11662  
11663  
11664  
11665  
11666  
11667  
11668  
11669  
11670  
11671  
11672  
11673  
11674  
11675  
11676  
11677  
11678  
11679  
11680  
11681  
11682  
11683  
11684  
11685  
11686  
11687

## H.3.3 GENERALIZATION DROP AFTER FINE-TUNING

Table 97: Average Model Performance Drop

| Model (Strategy)         | MSE                          | Pearson                      |
|--------------------------|------------------------------|------------------------------|
| <b>DeepConvnet</b>       | -0.062<br>$\pm 0.030$        | 0.015<br>$\pm 0.072$         |
| <b>EEGNet</b>            | <b>-0.027</b><br>$\pm 0.044$ | 0.004<br>$\pm 0.087$         |
| <b>Conformer</b>         | -0.056<br>$\pm 0.026$        | -0.030<br>$\pm 0.080$        |
| <b>CTNet</b>             | -0.063<br>$\pm 0.034$        | 0.063<br>$\pm 0.093$         |
| <b>BIOT (f)</b>          | -0.058<br>$\pm 0.023$        | -0.015<br>$\pm 0.079$        |
| <b>BIOT (l)</b>          | -0.049<br>$\pm 0.030$        | -0.134<br>$\pm 0.078$        |
| <b>BENDR (f)</b>         | -0.039<br>$\pm 0.024$        | -0.112<br>$\pm 0.083$        |
| <b>BENDR (l)</b>         | -0.039<br>$\pm 0.027$        | 0.003<br>$\pm 0.025$         |
| <b>CBraMod (f)</b>       | -0.050<br>$\pm 0.026$        | -0.082<br>$\pm 0.096$        |
| <b>CBraMod (l)</b>       | 0.468<br>$\pm 2.013$         | 0.027<br>$\pm 0.131$         |
| <b>EEGPT (f)</b>         | -0.038<br>$\pm 0.016$        | -0.159<br>$\pm 0.058$        |
| <b>EEGPT (l)</b>         | -0.059<br>$\pm 0.023$        | -0.020<br>$\pm 0.084$        |
| <b>LaBraM (f)</b>        | -0.032<br>$\pm 0.021$        | <b>-0.188</b><br>$\pm 0.082$ |
| <b>LaBraM (l)</b>        | -0.032<br>$\pm 0.022$        | -0.010<br>$\pm 0.064$        |
| <b>STEEGformer-s (f)</b> | -0.035<br>$\pm 0.031$        | <b>-0.184</b><br>$\pm 0.071$ |
| <b>STEEGformer-s (l)</b> | -0.035<br>$\pm 0.019$        | 0.005<br>$\pm 0.092$         |
| <b>STEEGformer-b (f)</b> | -0.035<br>$\pm 0.027$        | -0.181<br>$\pm 0.063$        |
| <b>STEEGformer-b (l)</b> | -0.046<br>$\pm 0.028$        | -0.056<br>$\pm 0.064$        |
| <b>STEEGformer-l (f)</b> | -0.041<br>$\pm 0.027$        | -0.138<br>$\pm 0.074$        |
| <b>STEEGformer-l (l)</b> | -0.043<br>$\pm 0.022$        | -0.032<br>$\pm 0.089$        |

Table 98: Per-Subject Average Drop on Seen Subjects (Post-Fine-Tuning).

| Subject    | Metric  | DeepConvnet      | EEGNet            | Conformer        | CTNet            | BIOT (f)         | BIOT (l)          | BENDR (f)         | BENDR (l)        | CBraMod (f)       | CBraMod (l)       | EEGPT (f)         | EEGPT (l)        | LaBraM (f)        | LaBraM (l)        | STEEGformer-s (f) | STEEGformer-s (l) | STEEGformer-b (f) | STEEGformer-b (l) | STEEGformer-l (f) | STEEGformer-l (l) |
|------------|---------|------------------|-------------------|------------------|------------------|------------------|-------------------|-------------------|------------------|-------------------|-------------------|-------------------|------------------|-------------------|-------------------|-------------------|-------------------|-------------------|-------------------|-------------------|-------------------|
| subject_1  | MSE     | -0.034<br>±0.028 | 0.003<br>± 0.066  | -0.026<br>±0.019 | -0.045<br>±0.038 | -0.034<br>±0.029 | -0.023<br>±0.022  | -0.014<br>±0.024  | -0.059<br>±0.079 | -0.025<br>±0.030  | -3.729<br>±14.777 | -0.016<br>±0.024  | -0.029<br>±0.024 | -0.010<br>± 0.019 | -0.020<br>±0.053  | -0.015<br>±0.023  | -0.025<br>±0.061  | -0.021<br>±0.031  | -0.027<br>±0.049  | -0.025<br>±0.039  | -0.032<br>±0.040  |
|            | Pearson | -0.075<br>±0.349 | -0.079<br>±0.341  | -0.182<br>±0.358 | -0.041<br>±0.382 | -0.125<br>±0.369 | -0.201<br>±0.343  | -0.255<br>±0.321  | 0.045<br>±0.149  | -0.190<br>±0.277  | 0.053<br>±0.330   | -0.261<br>± 0.401 | -0.147<br>±0.393 | -0.262<br>± 0.343 | -0.077<br>±0.310  | -0.253<br>±0.363  | -0.103<br>±0.374  | -0.178<br>±0.267  | -0.129<br>±0.361  | -0.159<br>±0.295  | -0.072<br>±0.368  |
| subject_10 | MSE     | -0.047<br>±0.036 | -0.008<br>± 0.072 | -0.038<br>±0.022 | -0.036<br>±0.038 | -0.038<br>±0.024 | -0.021<br>±0.019  | -0.041<br>±0.028  | -0.028<br>±0.078 | -0.046<br>±0.028  | 4.667<br>± 7.986  | -0.030<br>±0.022  | -0.031<br>±0.023 | -0.027<br>±0.019  | -0.012<br>±0.046  | -0.030<br>±0.030  | -0.013<br>±0.055  | -0.022<br>±0.022  | -0.022<br>±0.046  | -0.039<br>±0.024  | -0.020<br>±0.034  |
|            | Pearson | 0.023<br>±0.408  | -0.010<br>±0.412  | -0.052<br>±0.385 | 0.075<br>±0.427  | -0.060<br>±0.403 | -0.159<br>±0.419  | -0.054<br>±0.333  | 0.035<br>±0.177  | -0.038<br>±0.316  | 0.005<br>±0.336   | -0.181<br>±0.421  | -0.050<br>±0.447 | -0.189<br>± 0.339 | -0.050<br>±0.394  | -0.126<br>±0.350  | -0.037<br>±0.397  | -0.215<br>± 0.353 | -0.061<br>±0.417  | -0.171<br>±0.389  | -0.093<br>±0.415  |
| subject_11 | MSE     | -0.057<br>±0.046 | -0.058<br>±0.083  | -0.040<br>±0.018 | -0.087<br>±0.053 | -0.048<br>±0.021 | -0.021<br>±0.025  | -0.039<br>±0.026  | -0.017<br>±0.087 | -0.045<br>±0.029  | 1.094<br>± 5.385  | -0.027<br>±0.021  | -0.033<br>±0.028 | -0.020<br>±0.019  | -0.014<br>± 0.047 | -0.023<br>±0.019  | -0.019<br>±0.051  | -0.026<br>±0.025  | -0.024<br>±0.038  | -0.028<br>±0.028  | -0.026<br>±0.031  |
|            | Pearson | 0.152<br>±0.486  | 0.133<br>±0.447   | -0.032<br>±0.460 | 0.200<br>±0.481  | 0.006<br>±0.419  | -0.223<br>±0.352  | -0.109<br>±0.385  | -0.004<br>±0.154 | -0.014<br>±0.340  | 0.100<br>±0.349   | -0.204<br>±0.378  | -0.048<br>±0.468 | -0.249<br>± 0.346 | -0.031<br>±0.413  | -0.228<br>± 0.395 | 0.043<br>±0.475   | -0.201<br>±0.376  | -0.027<br>±0.393  | -0.186<br>±0.301  | -0.027<br>±0.404  |
| subject_12 | MSE     | -0.077<br>±0.044 | -0.013<br>± 0.067 | -0.083<br>±0.035 | -0.093<br>±0.049 | -0.086<br>±0.034 | -0.068<br>±0.041  | -0.042<br>±0.028  | -0.092<br>±0.074 | -0.106<br>±0.043  | 0.454<br>± 7.666  | -0.031<br>±0.021  | -0.084<br>±0.056 | -0.077<br>±0.049  | -0.060<br>±0.058  | -0.062<br>±0.040  | -0.055<br>±0.063  | -0.059<br>±0.048  | -0.085<br>±0.064  | -0.079<br>±0.039  | -0.064<br>±0.047  |
|            | Pearson | -0.009<br>±0.392 | 0.012<br>±0.377   | 0.073<br>±0.419  | 0.070<br>±0.461  | 0.075<br>±0.396  | -0.026<br>±0.362  | -0.161<br>± 0.362 | 0.002<br>±0.143  | 0.050<br>±0.387   | 0.069<br>±0.414   | -0.185<br>± 0.405 | -0.051<br>±0.377 | 0.067<br>±0.444   | 0.053<br>±0.320   | -0.046<br>±0.413  | -0.040<br>±0.409  | -0.057<br>±0.456  | -0.071<br>±0.389  | -0.009<br>±0.394  | -0.028<br>±0.360  |
| subject_13 | MSE     | -0.113<br>±0.046 | -0.039<br>± 0.045 | -0.154<br>±0.057 | -0.173<br>±0.058 | -0.125<br>±0.061 | -0.130<br>±0.057  | -0.129<br>±0.054  | -0.095<br>±0.098 | -0.132<br>±0.046  | -2.438<br>±13.922 | -0.087<br>±0.038  | -0.117<br>±0.056 | -0.086<br>±0.042  | -0.076<br>±0.067  | -0.154<br>±0.057  | -0.053<br>± 0.069 | -0.142<br>±0.051  | -0.105<br>±0.072  | -0.143<br>±0.056  | -0.123<br>±0.068  |
|            | Pearson | 0.046<br>±0.376  | -0.104<br>±0.357  | 0.054<br>±0.350  | 0.039<br>±0.466  | -0.006<br>±0.345 | -0.162<br>± 0.349 | 0.017<br>±0.318   | -0.001<br>±0.156 | -0.044<br>±0.300  | -0.102<br>±0.330  | -0.235<br>± 0.352 | -0.108<br>±0.399 | -0.125<br>±0.344  | 0.027<br>±0.321   | -0.082<br>±0.343  | -0.017<br>±0.409  | -0.074<br>±0.334  | -0.119<br>±0.351  | -0.039<br>±0.343  | -0.034<br>±0.374  |
| subject_14 | MSE     | -0.037<br>±0.040 | -0.012<br>± 0.063 | -0.071<br>±0.039 | -0.088<br>±0.050 | -0.056<br>±0.043 | -0.030<br>±0.024  | -0.032<br>±0.024  | -0.041<br>±0.075 | -0.035<br>±0.037  | -1.549<br>±6.792  | -0.037<br>±0.029  | -0.057<br>±0.046 | -0.041<br>±0.047  | -0.030<br>±0.058  | -0.025<br>±0.039  | -0.014<br>± 0.057 | -0.027<br>±0.030  | -0.025<br>±0.047  | -0.031<br>±0.040  | -0.040<br>±0.045  |
|            | Pearson | -0.008<br>±0.354 | 0.083<br>±0.416   | 0.053<br>±0.497  | 0.071<br>±0.424  | 0.042<br>±0.424  | -0.187<br>±0.325  | -0.124<br>±0.342  | 0.019<br>±0.190  | -0.190<br>± 0.284 | -0.036<br>±0.297  | -0.145<br>±0.466  | -0.016<br>±0.451 | -0.124<br>±0.385  | -0.009<br>±0.388  | -0.229<br>± 0.410 | -0.096<br>±0.438  | -0.176<br>±0.402  | -0.132<br>±0.382  | -0.148<br>±0.438  | -0.119<br>±0.393  |
| subject_15 | MSE     | -0.032<br>±0.027 | -0.015<br>±0.058  | -0.034<br>±0.021 | -0.041<br>±0.029 | -0.038<br>±0.020 | -0.024<br>±0.025  | -0.025<br>±0.021  | -0.012<br>±0.078 | -0.024<br>±0.033  | 0.054<br>± 6.150  | -0.029<br>±0.021  | -0.043<br>±0.030 | -0.024<br>±0.017  | -0.013<br>±0.048  | -0.010<br>± 0.026 | -0.014<br>±0.055  | -0.024<br>±0.026  | -0.022<br>±0.043  | -0.027<br>±0.029  | -0.020<br>±0.035  |

Continued on next page

| Subject    | Metric  | DeepConvnet      | EEGNet                         | Conformer        | CTNet            | BIOT (f)         | BIOT (l)                        | BENDR (f)        | BENDR (l)                       | CBraMod (f)      | CBraMod (l)       | EEGPT (f)                       | EEGPT (l)        | LaBraM (f)        | LaBraM (l)       | STEEGformer-s (f)               | STEEGformer-s (l)               | STEEGformer-b (f)               | STEEGformer-b (l) | STEEGformer-l (f) | STEEGformer-l (l) |
|------------|---------|------------------|--------------------------------|------------------|------------------|------------------|---------------------------------|------------------|---------------------------------|------------------|-------------------|---------------------------------|------------------|-------------------|------------------|---------------------------------|---------------------------------|---------------------------------|-------------------|-------------------|-------------------|
|            | Pearson | -0.020<br>±0.432 | 0.069<br>±0.499                | -0.033<br>±0.506 | 0.112<br>±0.422  | -0.005<br>±0.481 | <b>-0.147</b><br>± <b>0.354</b> | -0.129<br>±0.417 | 0.011<br>±0.164                 | -0.140<br>±0.301 | -0.031<br>±0.356  | -0.108<br>±0.520                | -0.073<br>±0.500 | -0.131<br>±0.393  | -0.015<br>±0.400 | -0.254<br>± 0.407               | -0.043<br>±0.443                | -0.141<br>±0.293                | -0.038<br>±0.436  | -0.082<br>±0.298  | -0.071<br>±0.487  |
| subject_16 | MSE     | -0.054<br>±0.037 | <b>0.005</b><br>± <b>0.075</b> | -0.044<br>±0.024 | -0.072<br>±0.047 | -0.036<br>±0.030 | -0.023<br>±0.015                | -0.014<br>±0.023 | -0.085<br>±0.068                | -0.035<br>±0.031 | 0.062<br>± 4.955  | -0.037<br>±0.027                | -0.042<br>±0.034 | -0.014<br>±0.018  | -0.050<br>±0.053 | -0.019<br>±0.034                | -0.042<br>±0.054                | -0.020<br>±0.028                | -0.043<br>±0.047  | -0.006<br>±0.020  | -0.039<br>±0.041  |
|            | Pearson | -0.036<br>±0.385 | -0.052<br>±0.355               | -0.078<br>±0.346 | 0.021<br>±0.373  | -0.150<br>±0.394 | <b>-0.259</b><br>± <b>0.403</b> | -0.227<br>±0.372 | 0.033<br>±0.129                 | -0.153<br>±0.298 | -0.026<br>±0.325  | -0.154<br>±0.438                | -0.103<br>±0.444 | -0.237<br>±0.374  | -0.037<br>±0.388 | -0.225<br>±0.385                | -0.037<br>±0.416                | -0.224<br>±0.440                | -0.119<br>±0.406  | -0.297<br>± 0.399 | -0.125<br>±0.421  |
| subject_17 | MSE     | -0.035<br>±0.028 | <b>0.008</b><br>± <b>0.060</b> | -0.040<br>±0.018 | -0.038<br>±0.034 | -0.046<br>±0.019 | -0.028<br>±0.022                | -0.047<br>±0.026 | -0.021<br>±0.070                | -0.030<br>±0.027 | 0.741<br>± 6.147  | -0.033<br>±0.020                | -0.055<br>±0.017 | -0.019<br>±0.022  | -0.033<br>±0.055 | -0.044<br>±0.035                | -0.050<br>±0.065                | -0.031<br>±0.027                | -0.045<br>±0.049  | -0.036<br>±0.030  | -0.051<br>±0.037  |
|            | Pearson | -0.013<br>±0.295 | 0.011<br>±0.313                | -0.021<br>±0.395 | 0.135<br>±0.327  | 0.045<br>±0.368  | -0.150<br>±0.331                | -0.027<br>±0.381 | -0.005<br>±0.152                | -0.203<br>±0.317 | 0.259<br>±0.415   | -0.151<br>±0.384                | 0.215<br>±0.365  | -0.245<br>± 0.338 | -0.001<br>±0.349 | -0.142<br>±0.377                | 0.065<br>±0.418                 | <b>-0.215</b><br>± <b>0.340</b> | -0.017<br>±0.389  | -0.174<br>±0.294  | 0.122<br>±0.397   |
| subject_18 | MSE     | -0.047<br>±0.037 | <b>0.013</b><br>± <b>0.071</b> | -0.034<br>±0.020 | -0.043<br>±0.036 | -0.090<br>±0.061 | -0.037<br>±0.021                | -0.019<br>±0.023 | -0.064<br>±0.079                | -0.026<br>±0.026 | 3.223<br>± 5.978  | -0.030<br>±0.027                | -0.049<br>±0.032 | -0.012<br>±0.016  | -0.031<br>±0.054 | -0.021<br>±0.020                | -0.047<br>±0.064                | -0.021<br>±0.026                | -0.047<br>±0.054  | -0.033<br>±0.039  | -0.042<br>±0.048  |
|            | Pearson | -0.030<br>±0.369 | -0.007<br>±0.347               | -0.118<br>±0.423 | 0.039<br>±0.415  | 0.007<br>±0.404  | -0.131<br>±0.377                | -0.182<br>±0.350 | -0.006<br>±0.161                | -0.144<br>±0.292 | 0.091<br>±0.353   | -0.096<br>±0.469                | -0.041<br>±0.463 | -0.190<br>±0.370  | -0.021<br>±0.326 | <b>-0.210</b><br>± <b>0.341</b> | -0.006<br>±0.389                | -0.220<br>± 0.382               | -0.070<br>±0.381  | -0.156<br>±0.381  | -0.042<br>±0.399  |
| subject_19 | MSE     | -0.044<br>±0.035 | -0.015<br>±0.077               | -0.052<br>±0.026 | -0.039<br>±0.048 | -0.044<br>±0.019 | -0.030<br>±0.027                | -0.034<br>±0.021 | <b>-0.005</b><br>± <b>0.072</b> | -0.045<br>±0.028 | 2.112<br>± 3.820  | -0.031<br>±0.024                | -0.038<br>±0.020 | -0.021<br>±0.019  | -0.011<br>±0.045 | -0.034<br>±0.032                | -0.014<br>±0.051                | -0.017<br>±0.020                | -0.025<br>±0.038  | -0.039<br>±0.027  | -0.029<br>±0.029  |
|            | Pearson | 0.037<br>±0.419  | 0.035<br>±0.357                | 0.069<br>±0.471  | 0.064<br>±0.441  | -0.006<br>±0.386 | -0.105<br>±0.342                | -0.111<br>±0.352 | -0.027<br>±0.165                | -0.088<br>±0.323 | -0.046<br>±0.317  | -0.216<br>±0.395                | -0.003<br>±0.435 | -0.267<br>± 0.355 | -0.023<br>±0.367 | -0.127<br>±0.359                | -0.011<br>±0.429                | <b>-0.248</b><br>± <b>0.368</b> | -0.007<br>±0.369  | -0.122<br>±0.317  | -0.020<br>±0.462  |
| subject_2  | MSE     | -0.101<br>±0.061 | -0.050<br>±0.090               | -0.041<br>±0.021 | -0.041<br>±0.028 | -0.053<br>±0.034 | -0.042<br>±0.028                | -0.041<br>±0.032 | -0.023<br>±0.091                | -0.035<br>±0.030 | 1.718<br>± 4.427  | -0.027<br>±0.022                | -0.053<br>±0.040 | -0.018<br>±0.021  | -0.018<br>±0.048 | -0.015<br>±0.025                | <b>-0.013</b><br>± <b>0.051</b> | -0.017<br>±0.025                | -0.019<br>±0.040  | -0.033<br>±0.025  | -0.025<br>±0.033  |
|            | Pearson | 0.107<br>±0.401  | 0.062<br>±0.373                | 0.029<br>±0.441  | 0.153<br>±0.395  | 0.142<br>±0.486  | -0.025<br>±0.378                | 0.008<br>±0.367  | -0.024<br>±0.174                | -0.035<br>±0.268 | -0.098<br>±0.340  | -0.045<br>±0.481                | 0.069<br>±0.459  | -0.156<br>± 0.372 | 0.070<br>±0.407  | -0.114<br>±0.378                | -0.003<br>±0.415                | <b>-0.146</b><br>± <b>0.365</b> | -0.061<br>±0.367  | -0.086<br>±0.262  | -0.049<br>±0.385  |
| subject_20 | MSE     | -0.049<br>±0.048 | -0.076<br>±0.083               | -0.045<br>±0.032 | -0.063<br>±0.053 | -0.067<br>±0.045 | -0.105<br>±0.072                | -0.012<br>±0.022 | -0.056<br>±0.094                | -0.069<br>±0.046 | 0.631<br>± 1.631  | -0.034<br>±0.030                | -0.077<br>±0.050 | -0.037<br>±0.029  | -0.011<br>±0.048 | <b>-0.002</b><br>± <b>0.027</b> | -0.034<br>±0.065                | -0.034<br>±0.042                | -0.027<br>±0.045  | -0.065<br>±0.054  | -0.039<br>±0.038  |
|            | Pearson | -0.032<br>±0.387 | -0.004<br>±0.351               | -0.060<br>±0.382 | 0.191<br>±0.477  | -0.040<br>±0.397 | -0.015<br>±0.424                | -0.209<br>±0.378 | 0.027<br>±0.158                 | 0.005<br>±0.376  | -0.257<br>± 0.393 | -0.098<br>±0.384                | 0.051<br>±0.453  | -0.161<br>±0.357  | -0.061<br>±0.370 | <b>-0.252</b><br>± <b>0.367</b> | 0.057<br>±0.395                 | -0.136<br>±0.416                | -0.055<br>±0.493  | -0.069<br>±0.384  | -0.089<br>±0.486  |
| subject_21 | MSE     | -0.151<br>±0.072 | -0.167<br>±0.098               | -0.065<br>±0.025 | -0.109<br>±0.043 | -0.092<br>±0.040 | -0.082<br>±0.039                | -0.036<br>±0.018 | -0.043<br>±0.080                | -0.041<br>±0.035 | 0.649<br>± 3.899  | <b>-0.028</b><br>± <b>0.019</b> | -0.086<br>±0.039 | -0.032<br>±0.022  | -0.069<br>±0.048 | -0.045<br>±0.021                | -0.089<br>±0.059                | -0.052<br>±0.035                | -0.125<br>±0.063  | -0.056<br>±0.037  | -0.064<br>±0.032  |
|            | Pearson | 0.055<br>±0.406  | -0.096<br>±0.433               | -0.078<br>±0.483 | -0.044<br>±0.468 | 0.012<br>±0.451  | -0.163<br>±0.394                | -0.157<br>±0.392 | -0.023<br>±0.213                | -0.179<br>±0.315 | -0.061<br>±0.332  | <b>-0.212</b><br>± <b>0.453</b> | -0.033<br>±0.471 | -0.257<br>± 0.358 | -0.056<br>±0.383 | -0.158<br>±0.402                | -0.058<br>±0.429                | -0.158<br>±0.292                | -0.088<br>±0.399  | -0.112<br>±0.306  | -0.051<br>±0.427  |

Continued on next page

| Subject   | Metric  | DeepConvnet      | EEGNet                          | Conformer        | CTNet            | BIOT (f)         | BIOT (l)          | BENDR (f)                       | BENDR (l)                       | CBraMod (f)      | CBraMod (l)       | EEGPT (f)        | EEGPT (l)        | LaBraM (f)                      | LaBraM (l)        | STEEGformer-s (f)               | STEEGformer-s (l) | STEEGformer-b (f)               | STEEGformer-b (l) | STEEGformer-l (f)               | STEEGformer-l (l) |
|-----------|---------|------------------|---------------------------------|------------------|------------------|------------------|-------------------|---------------------------------|---------------------------------|------------------|-------------------|------------------|------------------|---------------------------------|-------------------|---------------------------------|-------------------|---------------------------------|-------------------|---------------------------------|-------------------|
| subject_3 | MSE     | -0.066<br>±0.041 | <b>-0.011</b><br>± <b>0.037</b> | -0.059<br>±0.036 | -0.094<br>±0.051 | -0.065<br>±0.035 | -0.083<br>±0.032  | -0.057<br>±0.039                | -0.028<br>±0.078                | -0.054<br>±0.030 | 1.144<br>± 4.973  | -0.055<br>±0.033 | -0.073<br>±0.043 | -0.028<br>±0.030                | -0.084<br>±0.073  | -0.041<br>±0.033                | -0.047<br>±0.068  | -0.042<br>±0.027                | -0.077<br>±0.069  | -0.032<br>±0.029                | -0.060<br>±0.054  |
|           | Pearson | -0.013<br>±0.384 | -0.071<br>±0.376                | -0.046<br>±0.452 | -0.023<br>±0.410 | -0.071<br>±0.378 | -0.142<br>±0.336  | -0.107<br>±0.320                | 0.014<br>±0.208                 | -0.073<br>±0.337 | 0.088<br>±0.372   | -0.190<br>±0.390 | -0.083<br>±0.370 | -0.213<br>± 0.356               | 0.076<br>±0.367   | -0.191<br>±0.360                | -0.011<br>±0.404  | -0.134<br>±0.350                | -0.087<br>±0.374  | <b>-0.202</b><br>± <b>0.307</b> | -0.048<br>±0.398  |
| subject_4 | MSE     | -0.045<br>±0.043 | <b>-0.001</b><br>± <b>0.062</b> | -0.043<br>±0.035 | -0.023<br>±0.036 | -0.046<br>±0.034 | -0.040<br>±0.035  | -0.026<br>±0.027                | -0.033<br>±0.083                | -0.031<br>±0.033 | 1.065<br>± 4.849  | -0.029<br>±0.028 | -0.050<br>±0.036 | -0.029<br>±0.032                | -0.017<br>±0.054  | -0.028<br>±0.034                | -0.037<br>±0.063  | -0.023<br>±0.037                | -0.037<br>±0.053  | -0.041<br>±0.037                | -0.035<br>±0.043  |
|           | Pearson | 0.035<br>±0.386  | -0.049<br>±0.342                | -0.058<br>±0.410 | -0.020<br>±0.401 | 0.004<br>±0.357  | -0.028<br>±0.395  | <b>-0.141</b><br>± <b>0.376</b> | -0.047<br>±0.141                | -0.129<br>±0.336 | 0.068<br>±0.355   | -0.122<br>±0.410 | 0.033<br>±0.444  | -0.136<br>±0.358                | -0.010<br>±0.323  | -0.103<br>±0.357                | -0.037<br>±0.415  | -0.178<br>± 0.386               | -0.020<br>±0.374  | -0.010<br>±0.329                | -0.054<br>±0.422  |
| subject_5 | MSE     | -0.065<br>±0.036 | -0.005<br>± 0.074               | -0.054<br>±0.037 | -0.040<br>±0.040 | -0.027<br>±0.022 | -0.037<br>±0.025  | -0.033<br>±0.027                | -0.043<br>±0.076                | -0.039<br>±0.025 | -1.620<br>±2.747  | -0.046<br>±0.034 | -0.064<br>±0.051 | <b>-0.016</b><br>± <b>0.020</b> | -0.027<br>±0.058  | -0.037<br>±0.039                | -0.029<br>±0.052  | -0.021<br>±0.030                | -0.032<br>±0.042  | -0.024<br>±0.017                | -0.027<br>±0.041  |
|           | Pearson | -0.068<br>±0.426 | -0.077<br>±0.388                | -0.075<br>±0.476 | -0.082<br>±0.452 | -0.159<br>±0.447 | -0.163<br>±0.439  | -0.153<br>±0.387                | -0.024<br>±0.176                | -0.108<br>±0.324 | -0.088<br>±0.331  | -0.142<br>±0.483 | -0.055<br>±0.461 | -0.234<br>± 0.382               | -0.091<br>±0.375  | -0.104<br>±0.436                | -0.030<br>±0.423  | <b>-0.187</b><br>± <b>0.442</b> | -0.102<br>±0.409  | -0.132<br>±0.333                | -0.095<br>±0.482  |
| subject_6 | MSE     | -0.054<br>±0.043 | -0.009<br>±0.092                | -0.064<br>±0.049 | -0.048<br>±0.039 | -0.053<br>±0.028 | -0.029<br>±0.029  | -0.049<br>±0.042                | <b>-0.008</b><br>± <b>0.081</b> | -0.046<br>±0.038 | -3.346<br>±10.389 | -0.026<br>±0.027 | -0.036<br>±0.029 | -0.022<br>±0.020                | -0.008<br>± 0.045 | -0.017<br>±0.021                | -0.027<br>±0.062  | -0.022<br>±0.026                | -0.029<br>±0.043  | -0.030<br>±0.033                | -0.028<br>±0.035  |
|           | Pearson | 0.163<br>±0.376  | 0.127<br>±0.343                 | 0.112<br>±0.383  | 0.087<br>±0.331  | 0.120<br>±0.338  | -0.140<br>±0.334  | 0.006<br>±0.318                 | 0.001<br>±0.225                 | -0.135<br>±0.326 | 0.240<br>±0.416   | -0.243<br>±0.368 | 0.036<br>±0.359  | <b>-0.266</b><br>± <b>0.343</b> | -0.051<br>±0.337  | -0.272<br>± 0.380               | 0.240<br>±0.349   | -0.219<br>±0.364                | 0.022<br>±0.399   | -0.193<br>±0.423                | 0.009<br>±0.417   |
| subject_7 | MSE     | -0.053<br>±0.028 | <b>0.001</b><br>± <b>0.061</b>  | -0.071<br>±0.047 | -0.067<br>±0.043 | -0.072<br>±0.046 | -0.082<br>±0.059  | -0.033<br>±0.018                | -0.004<br>±0.074                | -0.071<br>±0.040 | 1.895<br>± 5.323  | -0.053<br>±0.028 | -0.093<br>±0.050 | -0.065<br>±0.044                | -0.038<br>±0.053  | -0.066<br>±0.051                | -0.045<br>±0.060  | -0.050<br>±0.038                | -0.061<br>±0.056  | -0.022<br>±0.050                | -0.055<br>±0.045  |
|           | Pearson | 0.138<br>±0.373  | 0.055<br>±0.440                 | -0.081<br>±0.447 | 0.115<br>±0.360  | 0.006<br>±0.360  | -0.072<br>±0.373  | -0.101<br>±0.345                | 0.035<br>±0.177                 | 0.127<br>±0.361  | 0.243<br>±0.418   | -0.118<br>±0.377 | 0.093<br>±0.398  | -0.056<br>±0.400                | 0.075<br>±0.325   | -0.169<br>± 0.426               | 0.087<br>±0.340   | -0.094<br>±0.439                | 0.023<br>±0.385   | <b>-0.134</b><br>± <b>0.361</b> | 0.074<br>±0.402   |
| subject_8 | MSE     | -0.095<br>±0.066 | -0.118<br>±0.090                | -0.056<br>±0.035 | -0.041<br>±0.039 | -0.050<br>±0.032 | -0.054<br>±0.046  | -0.059<br>±0.048                | -0.040<br>±0.098                | -0.057<br>±0.050 | 0.899<br>± 3.249  | -0.070<br>±0.052 | -0.086<br>±0.042 | -0.050<br>±0.038                | -0.028<br>±0.059  | <b>-0.025</b><br>± <b>0.034</b> | -0.044<br>±0.063  | -0.044<br>±0.035                | -0.051<br>±0.058  | -0.043<br>±0.029                | -0.039<br>±0.045  |
|           | Pearson | -0.104<br>±0.371 | -0.154<br>±0.401                | -0.179<br>±0.406 | -0.104<br>±0.425 | -0.132<br>±0.413 | -0.301<br>± 0.305 | -0.186<br>±0.367                | -0.019<br>±0.120                | -0.157<br>±0.292 | -0.108<br>±0.289  | -0.174<br>±0.454 | -0.144<br>±0.457 | -0.244<br>±0.357                | -0.126<br>±0.369  | <b>-0.300</b><br>± <b>0.355</b> | -0.104<br>±0.421  | -0.264<br>±0.351                | -0.153<br>±0.404  | -0.286<br>±0.325                | -0.127<br>±0.441  |
| subject_9 | MSE     | -0.039<br>±0.031 | <b>-0.008</b><br>± <b>0.070</b> | -0.054<br>±0.020 | -0.047<br>±0.032 | -0.046<br>±0.020 | -0.043<br>±0.019  | -0.044<br>±0.021                | -0.012<br>±0.072                | -0.050<br>±0.044 | 2.091<br>± 6.168  | -0.045<br>±0.020 | -0.045<br>±0.019 | -0.014<br>±0.017                | -0.027<br>±0.045  | -0.026<br>±0.019                | -0.030<br>±0.048  | -0.015<br>±0.016                | -0.037<br>±0.035  | -0.039<br>±0.024                | -0.048<br>±0.029  |
|           | Pearson | -0.036<br>±0.351 | 0.200<br>±0.422                 | 0.083<br>±0.419  | 0.259<br>±0.387  | -0.032<br>±0.408 | -0.018<br>±0.365  | 0.051<br>±0.299                 | 0.028<br>±0.194                 | 0.125<br>±0.428  | 0.201<br>±0.404   | -0.053<br>±0.378 | 0.050<br>±0.389  | -0.267<br>±0.348                | 0.153<br>±0.345   | <b>-0.270</b><br>± <b>0.387</b> | 0.243<br>±0.434   | -0.330<br>± 0.402               | 0.128<br>±0.401   | -0.141<br>±0.383                | 0.267<br>±0.410   |
